# Supplementary material for: Extrachromosomal circular DNA harboring targeted tumor suppressor gene mutations supports intratumor heterogeneity in mouse liver cancer induced by multiplexed CRISPR/Cas9
Source: Research Square preprint supplement (doi:10.21203/rs.3.rs-1333557/v1), 2022-02-10
Supplement: Supplementary file 1 [file 23fb6e07bc83864740a0ed26.xlsx]

## Sheet: Reads
Target Gene	Mutation Type	1T1	1T2	1T3	1T4	1T5	1T6	1T7	1T8	1T9	1T10	1T11	2T1	2T2	2T3	2T4	2T5	2T6	2T7	3T1	3T2	3T3	4T5	P1	P2	P3	P4	Reference
Apc	WT	8677	17535	16212	7996	17822	11880	20842	18741	9423	15372	24568	10058	6875	15692	16796	5768	5592	10419	13756	12948	13499	17483	29067	26687	17550	7977	CATGGCATAAAGCAGTTACTACATAAGAACTTGTTTCTGTTTAGAATTTAACTTAGATAGTAATTTCCCCGGAGTGAAACTACGCTCAAAAATGTCCCTTCGCTCCTACG|GAAGTCGGGAAGGATCTGTATCCAGCCGTTCAGGAGAATGCAGTCCTGTCCCCATGGGGTCATTCCCAAGAAGAACATTTGTAAATGGAAGCAGAGAGAGTACTGGGTATC
Apc	Del 1|0	22566	2633	0	0	1818	5682	2731	5621	6478	7443	0	16311	0	9474	4334	8909	7889	4978	0	1202	6707	4571	1691	1414	636	584	CATGGCATAAAGCAGTTACTACATAAGAACTTGTTTCTGTTTAGAATTTAACTTAGATAGTAATTTCCCCGGAGTGAAACTACGCTCAAAAATGTCCCTTCGCTCCTAC-|GAAGTCGGGAAGGATCTGTATCCAGCCGTTCAGGAGAATGCAGTCCTGTCCCCATGGGGTCATTCCCAAGAAGAACATTTGTAAATGGAAGCAGAGAGAGTACTGGGTATC
Apc	Del 0|4	0	2491	8396	0	0	0	0	0	0	0	0	0	0	0	0	0	0	0	0	0	1766	0	0	0	0	0	CATGGCATAAAGCAGTTACTACATAAGAACTTGTTTCTGTTTAGAATTTAACTTAGATAGTAATTTCCCCGGAGTGAAACTACGCTCAAAAATGTCCCTTCGCTCCTACG|----TCGGGAAGGATCTGTATCCAGCCGTTCAGGAGAATGCAGTCCTGTCCCCATGGGGTCATTCCCAAGAAGAACATTTGTAAATGGAAGCAGAGAGAGTACTGGGTATC
Apc	Del 0|1 Ins 2 AA	0	2489	0	0	0	0	0	0	0	0	0	0	0	0	0	0	0	0	0	0	0	0	0	0	0	0	CATGGCATAAAGCAGTTACTACATAAGAACTTGTTTCTGTTTAGAATTTAACTTAGATAGTAATTTCCCCGGAGTGAAACTACGCTCAAAAATGTCCCTTCGCTCCTACG|-{AA}AAGTCGGGAAGGATCTGTATCCAGCCGTTCAGGAGAATGCAGTCCTGTCCCCATGGGGTCATTCCCAAGAAGAACATTTGTAAATGGAAGCAGAGAGAGTACTGGGTATC
Apc	Del 11|2	0	0	0	10117	0	0	0	0	0	0	0	0	0	0	0	0	0	0	0	0	0	0	0	0	0	0	CATGGCATAAAGCAGTTACTACATAAGAACTTGTTTCTGTTTAGAATTTAACTTAGATAGTAATTTCCCCGGAGTGAAACTACGCTCAAAAATGTCCCT-----------|--AGTCGGGAAGGATCTGTATCCAGCCGTTCAGGAGAATGCAGTCCTGTCCCCATGGGGTCATTCCCAAGAAGAACATTTGTAAATGGAAGCAGAGAGAGTACTGGGTATC
Apc	Del 6|9	0	0	0	9673	0	0	0	0	0	0	0	0	0	0	0	0	0	0	0	0	0	0	0	0	0	0	CATGGCATAAAGCAGTTACTACATAAGAACTTGTTTCTGTTTAGAATTTAACTTAGATAGTAATTTCCCCGGAGTGAAACTACGCTCAAAAATGTCCCTTCGCT------|---------AAGGATCTGTATCCAGCCGTTCAGGAGAATGCAGTCCTGTCCCCATGGGGTCATTCCCAAGAAGAACATTTGTAAATGGAAGCAGAGAGAGTACTGGGTATC
Apc	Del 22|24	0	0	0	0	2309	0	0	0	0	0	0	0	0	0	0	0	0	0	0	0	0	0	0	0	0	0	CATGGCATAAAGCAGTTACTACATAAGAACTTGTTTCTGTTTAGAATTTAACTTAGATAGTAATTTCCCCGGAGTGAAACTACGCTCA----------------------|------------------------GCCGTTCAGGAGAATGCAGTCCTGTCCCCATGGGGTCATTCCCAAGAAGAACATTTGTAAATGGAAGCAGAGAGAGTACTGGGTATC
Apc	Del 0|5	0	0	0	0	0	5616	0	0	5374	0	0	0	0	0	0	0	0	0	0	0	0	0	0	0	0	0	CATGGCATAAAGCAGTTACTACATAAGAACTTGTTTCTGTTTAGAATTTAACTTAGATAGTAATTTCCCCGGAGTGAAACTACGCTCAAAAATGTCCCTTCGCTCCTACG|-----CGGGAAGGATCTGTATCCAGCCGTTCAGGAGAATGCAGTCCTGTCCCCATGGGGTCATTCCCAAGAAGAACATTTGTAAATGGAAGCAGAGAGAGTACTGGGTATC
Apc	Del 0|7	0	0	0	0	0	0	2392	0	0	7199	0	0	0	0	0	9057	0	0	0	0	0	0	0	0	0	0	CATGGCATAAAGCAGTTACTACATAAGAACTTGTTTCTGTTTAGAATTTAACTTAGATAGTAATTTCCCCGGAGTGAAACTACGCTCAAAAATGTCCCTTCGCTCCTACG|-------GGAAGGATCTGTATCCAGCCGTTCAGGAGAATGCAGTCCTGTCCCCATGGGGTCATTCCCAAGAAGAACATTTGTAAATGGAAGCAGAGAGAGTACTGGGTATC
Apc	Del 5|6	0	0	0	0	0	0	2064	0	0	0	0	0	0	0	0	0	0	0	0	0	0	0	0	0	0	0	CATGGCATAAAGCAGTTACTACATAAGAACTTGTTTCTGTTTAGAATTTAACTTAGATAGTAATTTCCCCGGAGTGAAACTACGCTCAAAAATGTCCCTTCGCTC-----|------GGGAAGGATCTGTATCCAGCCGTTCAGGAGAATGCAGTCCTGTCCCCATGGGGTCATTCCCAAGAAGAACATTTGTAAATGGAAGCAGAGAGAGTACTGGGTATC
Apc	Del 4|3	0	0	0	0	0	0	0	4473	0	0	0	0	0	0	0	0	0	0	0	0	0	0	0	0	0	0	CATGGCATAAAGCAGTTACTACATAAGAACTTGTTTCTGTTTAGAATTTAACTTAGATAGTAATTTCCCCGGAGTGAAACTACGCTCAAAAATGTCCCTTCGCTCC----|---GTCGGGAAGGATCTGTATCCAGCCGTTCAGGAGAATGCAGTCCTGTCCCCATGGGGTCATTCCCAAGAAGAACATTTGTAAATGGAAGCAGAGAGAGTACTGGGTATC
Apc	Del 0|2	0	0	0	0	0	0	0	0	0	0	4506	0	17231	0	0	0	0	0	0	0	0	0	0	0	0	0	CATGGCATAAAGCAGTTACTACATAAGAACTTGTTTCTGTTTAGAATTTAACTTAGATAGTAATTTCCCCGGAGTGAAACTACGCTCAAAAATGTCCCTTCGCTCCTACG|--AGTCGGGAAGGATCTGTATCCAGCCGTTCAGGAGAATGCAGTCCTGTCCCCATGGGGTCATTCCCAAGAAGAACATTTGTAAATGGAAGCAGAGAGAGTACTGGGTATC
Apc	Ins 1 A	0	0	0	0	0	0	0	0	0	0	0	0	0	0	3519	0	0	0	0	0	0	0	0	0	0	0	CATGGCATAAAGCAGTTACTACATAAGAACTTGTTTCTGTTTAGAATTTAACTTAGATAGTAATTTCCCCGGAGTGAAACTACGCTCAAAAATGTCCCTTCGCTCCTACG|{A}GAAGTCGGGAAGGATCTGTATCCAGCCGTTCAGGAGAATGCAGTCCTGTCCCCATGGGGTCATTCCCAAGAAGAACATTTGTAAATGGAAGCAGAGAGAGTACTGGGTATC
Apc	Del 6|1	0	0	0	0	0	0	0	0	0	0	0	0	0	0	0	0	7814	0	0	0	0	0	0	0	0	0	CATGGCATAAAGCAGTTACTACATAAGAACTTGTTTCTGTTTAGAATTTAACTTAGATAGTAATTTCCCCGGAGTGAAACTACGCTCAAAAATGTCCCTTCGCT------|-AAGTCGGGAAGGATCTGTATCCAGCCGTTCAGGAGAATGCAGTCCTGTCCCCATGGGGTCATTCCCAAGAAGAACATTTGTAAATGGAAGCAGAGAGAGTACTGGGTATC
Apc	Del 0|8	0	0	0	0	0	0	0	0	0	0	0	0	0	0	0	0	0	4693	0	0	0	0	0	0	0	0	CATGGCATAAAGCAGTTACTACATAAGAACTTGTTTCTGTTTAGAATTTAACTTAGATAGTAATTTCCCCGGAGTGAAACTACGCTCAAAAATGTCCCTTCGCTCCTACG|--------GAAGGATCTGTATCCAGCCGTTCAGGAGAATGCAGTCCTGTCCCCATGGGGTCATTCCCAAGAAGAACATTTGTAAATGGAAGCAGAGAGAGTACTGGGTATC
Apc	Del 5|16	0	0	0	0	0	0	0	0	0	0	0	0	0	0	0	0	0	0	2373	0	0	0	0	0	0	0	CATGGCATAAAGCAGTTACTACATAAGAACTTGTTTCTGTTTAGAATTTAACTTAGATAGTAATTTCCCCGGAGTGAAACTACGCTCAAAAATGTCCCTTCGCTC-----|----------------TGTATCCAGCCGTTCAGGAGAATGCAGTCCTGTCCCCATGGGGTCATTCCCAAGAAGAACATTTGTAAATGGAAGCAGAGAGAGTACTGGGTATC
Apc	Del 0|13	0	0	0	0	0	0	0	0	0	0	0	0	0	0	0	0	0	0	2371	0	0	0	0	0	0	0	CATGGCATAAAGCAGTTACTACATAAGAACTTGTTTCTGTTTAGAATTTAACTTAGATAGTAATTTCCCCGGAGTGAAACTACGCTCAAAAATGTCCCTTCGCTCCTACG|-------------ATCTGTATCCAGCCGTTCAGGAGAATGCAGTCCTGTCCCCATGGGGTCATTCCCAAGAAGAACATTTGTAAATGGAAGCAGAGAGAGTACTGGGTATC
Apc	Ins 1 T	0	0	0	0	0	0	0	0	0	0	0	0	0	0	0	0	0	0	0	3677	0	0	0	0	0	0	CATGGCATAAAGCAGTTACTACATAAGAACTTGTTTCTGTTTAGAATTTAACTTAGATAGTAATTTCCCCGGAGTGAAACTACGCTCAAAAATGTCCCTTCGCTCCTACG|{T}GAAGTCGGGAAGGATCTGTATCCAGCCGTTCAGGAGAATGCAGTCCTGTCCCCATGGGGTCATTCCCAAGAAGAACATTTGTAAATGGAAGCAGAGAGAGTACTGGGTATC
Apc	Del 2|0	0	0	0	0	0	0	0	0	0	0	0	0	0	0	0	0	0	0	0	3510	0	4305	7544	4856	4371	2118	CATGGCATAAAGCAGTTACTACATAAGAACTTGTTTCTGTTTAGAATTTAACTTAGATAGTAATTTCCCCGGAGTGAAACTACGCTCAAAAATGTCCCTTCGCTCCTA--|GAAGTCGGGAAGGATCTGTATCCAGCCGTTCAGGAGAATGCAGTCCTGTCCCCATGGGGTCATTCCCAAGAAGAACATTTGTAAATGGAAGCAGAGAGAGTACTGGGTATC
Apc	Del 5|0	0	0	0	0	0	0	0	0	0	0	0	0	0	0	0	0	0	0	0	0	0	0	8141	4381	3482	1609	CATGGCATAAAGCAGTTACTACATAAGAACTTGTTTCTGTTTAGAATTTAACTTAGATAGTAATTTCCCCGGAGTGAAACTACGCTCAAAAATGTCCCTTCGCTC-----|GAAGTCGGGAAGGATCTGTATCCAGCCGTTCAGGAGAATGCAGTCCTGTCCCCATGGGGTCATTCCCAAGAAGAACATTTGTAAATGGAAGCAGAGAGAGTACTGGGTATC
Apc	Del 3|0	0	0	0	0	0	0	0	0	0	0	0	0	0	0	0	0	0	0	0	0	0	0	7660	4500	4020	1834	CATGGCATAAAGCAGTTACTACATAAGAACTTGTTTCTGTTTAGAATTTAACTTAGATAGTAATTTCCCCGGAGTGAAACTACGCTCAAAAATGTCCCTTCGCTCCT---|GAAGTCGGGAAGGATCTGTATCCAGCCGTTCAGGAGAATGCAGTCCTGTCCCCATGGGGTCATTCCCAAGAAGAACATTTGTAAATGGAAGCAGAGAGAGTACTGGGTATC
Apob	WT	2741	15763	12593	7968	22172	12016	12032	17366	9640	13392	16894	6807	2477	11536	12790	5037	5420	9605	18218	23362	17377	18444	96925	110417	66457	70522	TCCGAAGACCCTGTAGAGCAAGCAGCAGGGGCTAGGCCCGTGGCCAGGCCACAGCCAGGAAGCCACCCCACCATCCATCCGCCATGGGCCCACGAAAGCCTGCCCTGC|GGACGCCGTTACTGCTGCTGTTCCTGCTACTGTTCTTGGACACCAGCGTCTGGGCTCGTGAGTTAGGGTGGAAGCCTGGGAGAAAGCCA
Apob	Del 0|1	9191	11049	6251	10137	2373	0	1165	3336	14488	13044	4759	12887	16186	7447	6155	15193	8100	20480	0	11328	7327	4520	37051	23050	26389	57899	TCCGAAGACCCTGTAGAGCAAGCAGCAGGGGCTAGGCCCGTGGCCAGGCCACAGCCAGGAAGCCACCCCACCATCCATCCGCCATGGGCCCACGAAAGCCTGCCCTGC|-GACGCCGTTACTGCTGCTGTTCCTGCTACTGTTCTTGGACACCAGCGTCTGGGCTCGTGAGTTAGGGTGGAAGCCTGGGAGAAAGCCA
Apob	Del 1|0	0	2348	0	0	0	0	0	0	0	0	0	0	0	0	0	0	0	0	0	0	0	0	0	0	0	0	TCCGAAGACCCTGTAGAGCAAGCAGCAGGGGCTAGGCCCGTGGCCAGGCCACAGCCAGGAAGCCACCCCACCATCCATCCGCCATGGGCCCACGAAAGCCTGCCCTG-|GGACGCCGTTACTGCTGCTGTTCCTGCTACTGTTCTTGGACACCAGCGTCTGGGCTCGTGAGTTAGGGTGGAAGCCTGGGAGAAAGCCA
Apob	Del 0|9	0	0	7204	0	0	0	0	0	0	0	0	0	0	0	0	0	0	0	0	0	0	0	0	0	0	0	TCCGAAGACCCTGTAGAGCAAGCAGCAGGGGCTAGGCCCGTGGCCAGGCCACAGCCAGGAAGCCACCCCACCATCCATCCGCCATGGGCCCACGAAAGCCTGCCCTGC|G---------ACTGCTGCTGTTCCTGCTACTGTTCTTGGACACCAGCGTCTGGGCTCGTGAGTTAGGGTGGAAGCCTGGGAGAAAGCCA
Apob	Del 2|0	0	0	0	9575	0	0	0	0	0	0	0	0	0	0	0	0	0	0	0	0	0	0	0	0	0	0	TCCGAAGACCCTGTAGAGCAAGCAGCAGGGGCTAGGCCCGTGGCCAGGCCACAGCCAGGAAGCCACCCCACCATCCATCCGCCATGGGCCCACGAAAGCCTGCCCT--|GGACGCCGTTACTGCTGCTGTTCCTGCTACTGTTCTTGGACACCAGCGTCTGGGCTCGTGAGTTAGGGTGGAAGCCTGGGAGAAAGCCA
Apob	Del 0|5	0	0	0	0	0	5763	0	0	0	0	0	0	0	0	0	0	0	0	0	0	0	4981	0	0	0	0	TCCGAAGACCCTGTAGAGCAAGCAGCAGGGGCTAGGCCCGTGGCCAGGCCACAGCCAGGAAGCCACCCCACCATCCATCCGCCATGGGCCCACGAAAGCCTGCCCTGC|G-----CGTTACTGCTGCTGTTCCTGCTACTGTTCTTGGACACCAGCGTCTGGGCTCGTGAGTTAGGGTGGAAGCCTGGGAGAAAGCCA
Apob	Del 0|4	0	0	0	0	0	5733	0	0	0	0	0	0	0	0	0	0	0	0	0	0	0	0	0	0	0	0	TCCGAAGACCCTGTAGAGCAAGCAGCAGGGGCTAGGCCCGTGGCCAGGCCACAGCCAGGAAGCCACCCCACCATCCATCCGCCATGGGCCCACGAAAGCCTGCCCTGC|----GCCGTTACTGCTGCTGTTCCTGCTACTGTTCTTGGACACCAGCGTCTGGGCTCGTGAGTTAGGGTGGAAGCCTGGGAGAAAGCCA
Apob	Del 3|41	0	0	0	0	0	0	2237	0	0	0	0	0	0	0	0	0	0	0	0	0	0	0	0	0	0	0	TCCGAAGACCCTGTAGAGCAAGCAGCAGGGGCTAGGCCCGTGGCCAGGCCACAGCCAGGAAGCCACCCCACCATCCATCCGCCATGGGCCCACGAAAGCCTGCCC--- | -----------------------------------------ACCAGCGTCTGGGCTCGTGAGTTAGGGTGGAAGCCTGGGAGAAAGCCA
Apob	Del 0|15	0	0	0	0	0	0	2303	0	0	0	0	0	0	0	0	0	0	0	0	0	0	0	0	0	0	0	TCCGAAGACCCTGTAGAGCAAGCAGCAGGGGCTAGGCCCGTGGCCAGGCCACAGCCAGGAAGCCACCCCACCATCCATCCGCCATGGGCCCACGAAAGCCTGCCCTGC|---------------TGCTGTTCCTGCTACTGTTCTTGGACACCAGCGTCTGGGCTCGTGAGTTAGGGTGGAAGCCTGGGAGAAAGCCA
Apob	Ins 1 G	0	0	0	0	0	0	0	3044	0	0	0	0	0	0	0	0	0	0	0	0	0	0	0	0	0	0	TCCGAAGACCCTGTAGAGCAAGCAGCAGGGGCTAGGCCCGTGGCCAGGCCACAGCCAGGAAGCCACCCCACCATCCATCCGCCATGGGCCCACGAAAGCCTGCCCTGC|{G}GGACGCCGTTACTGCTGCTGTTCCTGCTACTGTTCTTGGACACCAGCGTCTGGGCTCGTGAGTTAGGGTGGAAGCCTGGGAGAAAGCCA
Apob	Del 0|16	0	0	0	0	0	0	0	0	0	0	3989	0	0	0	0	0	0	0	0	0	0	0	0	0	0	0	TCCGAAGACCCTGTAGAGCAAGCAGCAGGGGCTAGGCCCGTGGCCAGGCCACAGCCAGGAAGCCACCCCACCATCCATCCGCCATGGGCCCACGAAAGCCTGCCCTGC|----------------GCTGTTCCTGCTACTGTTCTTGGACACCAGCGTCTGGGCTCGTGAGTTAGGGTGGAAGCCTGGGAGAAAGCCA
Apob	Del 4|0	0	0	0	0	0	0	0	0	0	0	0	0	0	0	0	0	8060	0	0	0	0	0	0	0	0	0	TCCGAAGACCCTGTAGAGCAAGCAGCAGGGGCTAGGCCCGTGGCCAGGCCACAGCCAGGAAGCCACCCCACCATCCATCCGCCATGGGCCCACGAAAGCCTGCC----|GGACGCCGTTACTGCTGCTGTTCCTGCTACTGTTCTTGGACACCAGCGTCTGGGCTCGTGAGTTAGGGTGGAAGCCTGGGAGAAAGCCA
Apob	Del 0|11	0	0	0	0	0	0	0	0	0	0	0	0	0	0	0	0	0	0	3870	0	0	0	517	406	9323	714	TCCGAAGACCCTGTAGAGCAAGCAGCAGGGGCTAGGCCCGTGGCCAGGCCACAGCCAGGAAGCCACCCCACCATCCATCCGCCATGGGCCCACGAAAGCCTGCCCTGC|G-----------TGCTGCTGTTCCTGCTACTGTTCTTGGACACCAGCGTCTGGGCTCGTGAGTTAGGGTGGAAGCCTGGGAGAAAGCCA
Apob	Del 0|28	0	0	0	0	0	0	0	0	0	0	0	0	0	0	0	0	0	0	3334	0	0	0	0	0	0	0	TCCGAAGACCCTGTAGAGCAAGCAGCAGGGGCTAGGCCCGTGGCCAGGCCACAGCCAGGAAGCCACCCCACCATCCATCCGCCATGGGCCCACGAAAGCCTGCCCTGC|G----------------------------CTGTTCCTGCTACTGTTCTTGGACACCAGCGTCTGGGCTCGTGAGTTAGGGTGGAAGCCTGGGAGAAAGCCA
Apob	Del 0|28	0	0	0	0	0	0	0	0	0	0	0	0	0	0	0	0	0	0	1321	0	0	0	0	0	0	0	TCCGAAGACCCTGTAGAGCAAGCAGCAGGGGCTAGGCCCGTGGCCAGGCCACAGCCAGGAAGCCACCCCACCATCCATCCGCCATGGGCCCACGAAAGCCTGCCCTGC|GGACGCCGTTACTGCTGCTGTTCCTGCTACTGTTCTTGGACACCAGCGTCTGGGCTCGTGAGTTAGGGTGGAAGCCTGGGAGAAAGCCA
Apob	Del 0|2	0	0	0	0	0	0	0	0	0	0	0	0	0	0	0	0	0	0	0	2492	0	0	0	0	0	0	TCCGAAGACCCTGTAGAGCAAGCAGCAGGGGCTAGGCCCGTGGCCAGGCCACAGCCAGGAAGCCACCCCACCATCCATCCGCCATGGGCCCACGAAAGCCTGCCCTGC|--ACGCCGTTACTGCTGCTGTTCCTGCTACTGTTCTTGGACACCAGCGTCTGGGCTCGTGAGTTAGGGTGGAAGCCTGGGAGAAAGCCA
Apob	Del 4|4	0	0	0	0	0	0	0	0	0	0	0	0	0	0	0	0	0	0	0	0	0	0	372	261	7124	497	TCCGAAGACCCTGTAGAGCAAGCAGCAGGGGCTAGGCCCGTGGCCAGGCCACAGCCAGGAAGCCACCCCACCATCCATCCGCCATGGGCCCACGAAAGCCTGCC---- | ----GCCGTTACTGCTGCTGTTCCTGCTACTGTTCTTGGACACCAGCGTCTGGGCTCGTGAGTTAGGGTGGAAGCCTGGGAGAAAGCCA
Arid1a	WT	6531	28186	19825	9393	26918	14333	2721	13293	5863	14275	32017	17831	6228	29183	13765	7383	5478	39959	17589	31543	6972	26101	46792	45281	12076	16268	TATGCAGAGGAACCCCCAGATGCCCCAGTACACTTCCCCTCAGCCTGGCTCGGCCTTATCCCCACGTCAGCCGTCTGGAGGACAGATGCACTCGGG|CGTGGGCTCCTACCAGCAGAACTCCATTAGGGGAGCTACGGCCCCCAGGGCAGTCAGTATGGCCCACAAGGTAAGTGTGCTACCCCTTTAGAAGGAAAGAGAGGTACTGTGTTAACGGCTG
Arid1a	Del 37|14	9736	0	0	0	0	0	0	1058	0	0	0	0	0	0	0	0	0	0	0	0	0	0	0	0	0	0	TATGCAGAGGAACCCCCAGATGCCCCAGTACACTTCCCCTCAGCCTGGCTCGGCCTTAT-------------------------------------|--------------AGCAGAACTCCATTAGGGGAGCTACGGCCCCCAGGGCAGTCAGTATGGCCCACAAGGTAAGTGTGCTACCCCTTTAGAAGGAAAGAGAGGTACTGTGTTAACGGCTG
Arid1a	Del 13|2	1806	0	0	0	0	0	0	0	0	0	0	0	0	0	0	0	0	0	0	0	0	0	0	0	0	0	TATGCAGAGGAACCCCCAGATGCCCCAGTACACTTCCCCTCAGCCTGGCTCGGCCTTATCCCCACGTCAGCCGTCTGGAGGAC-------------|--TGGGCTCCTACCAGCAGAACTCCATTAGGGGAGCTACGGCCCCCAGGGCAGTCAGTATGGCCCACAAGGTAAGTGTGCTACCCCTTTAGAAGGAAAGAGAGGTACTGTGTTAACGGCTG
Arid1a	Del 1|0	1556	0	0	0	0	0	0	0	0	0	0	18380	0	0	0	0	0	0	0	0	1634	7298	1254	702	185	198	TATGCAGAGGAACCCCCAGATGCCCCAGTACACTTCCCCTCAGCCTGGCTCGGCCTTATCCCCACGTCAGCCGTCTGGAGGACAGATGCACTCGG-|CGTGGGCTCCTACCAGCAGAACTCCATTAGGGGAGCTACGGCCCCCAGGGCAGTCAGTATGGCCCACAAGGTAAGTGTGCTACCCCTTTAGAAGGAAAGAGAGGTACTGTGTTAACGGCTG
Arid1a	Del 1|2	0	6527	0	0	0	0	571	0	0	0	0	0	0	0	0	0	0	0	0	0	0	0	0	0	0	0	TATGCAGAGGAACCCCCAGATGCCCCAGTACACTTCCCCTCAGCCTGGCTCGGCCTTATCCCCACGTCAGCCGTCTGGAGGACAGATGCACTCGG-|--TGGGCTCCTACCAGCAGAACTCCATTAGGGGAGCTACGGCCCCCAGGGCAGTCAGTATGGCCCACAAGGTAAGTGTGCTACCCCTTTAGAAGGAAAGAGAGGTACTGTGTTAACGGCTG
Arid1a	Del 0|2	0	4849	0	0	3848	0	0	0	0	0	0	0	21559	0	4185	0	8594	0	3404	6945	1745	0	650	400	1140	1691	TATGCAGAGGAACCCCCAGATGCCCCAGTACACTTCCCCTCAGCCTGGCTCGGCCTTATCCCCACGTCAGCCGTCTGGAGGACAGATGCACTCGGG|--TGGGCTCCTACCAGCAGAACTCCATTAGGGGAGCTACGGCCCCCAGGGCAGTCAGTATGGCCCACAAGGTAAGTGTGCTACCCCTTTAGAAGGAAAGAGAGGTACTGTGTTAACGGCTG
Arid1a	Del 2|0	0	4714	0	0	0	0	0	0	0	0	0	0	0	0	0	0	0	0	0	0	0	8148	0	0	0	0	TATGCAGAGGAACCCCCAGATGCCCCAGTACACTTCCCCTCAGCCTGGCTCGGCCTTATCCCCACGTCAGCCGTCTGGAGGACAGATGCACTCG--|CGTGGGCTCCTACCAGCAGAACTCCATTAGGGGAGCTACGGCCCCCAGGGCAGTCAGTATGGCCCACAAGGTAAGTGTGCTACCCCTTTAGAAGGAAAGAGAGGTACTGTGTTAACGGCTG
Arid1a	Del 0|6	0	4146	0	0	0	0	455	0	0	0	0	0	0	0	3443	0	0	0	0	0	0	0	0	0	0	0	TATGCAGAGGAACCCCCAGATGCCCCAGTACACTTCCCCTCAGCCTGGCTCGGCCTTATCCCCACGTCAGCCGTCTGGAGGACAGATGCACTCGGG|------CTCCTACCAGCAGAACTCCATTAGGGGAGCTACGGCCCCCAGGGCAGTCAGTATGGCCCACAAGGTAAGTGTGCTACCCCTTTAGAAGGAAAGAGAGGTACTGTGTTAACGGCTG
Arid1a	Del 8|1	0	0	10813	0	0	0	0	0	0	0	0	0	0	0	0	0	0	0	0	0	0	0	0	0	0	0	TATGCAGAGGAACCCCCAGATGCCCCAGTACACTTCCCCTCAGCCTGGCTCGGCCTTATCCCCACGTCAGCCGTCTGGAGGACAGATG--------|-GTGGGCTCCTACCAGCAGAACTCCATTAGGGGAGCTACGGCCCCCAGGGCAGTCAGTATGGCCCACAAGGTAAGTGTGCTACCCCTTTAGAAGGAAAGAGAGGTACTGTGTTAACGGCTG
Arid1a	Del 0|1	0	0	9816	0	3806	7343	0	0	4974	0	0	0	0	9756	0	12126	0	0	0	4199	0	0	20076	12304	7003	8688	TATGCAGAGGAACCCCCAGATGCCCCAGTACACTTCCCCTCAGCCTGGCTCGGCCTTATCCCCACGTCAGCCGTCTGGAGGACAGATGCACTCGGG|-GTGGGCTCCTACCAGCAGAACTCCATTAGGGGAGCTACGGCCCCCAGGGCAGTCAGTATGGCCCACAAGGTAAGTGTGCTACCCCTTTAGAAGGAAAGAGAGGTACTGTGTTAACGGCTG
Arid1a	Del 21|9	0	0	0	12896	0	0	0	0	0	0	0	0	0	0	0	0	0	0	0	0	0	0	0	0	0	0	TATGCAGAGGAACCCCCAGATGCCCCAGTACACTTCCCCTCAGCCTGGCTCGGCCTTATCCCCACGTCAGCCGTCT---------------------|---------CTACCAGCAGAACTCCATTAGGGGAGCTACGGCCCCCAGGGCAGTCAGTATGGCCCACAAGGTAAGTGTGCTACCCCTTTAGAAGGAAAGAGAGGTACTGTGTTAACGGCTG
Arid1a	Del 8|0	0	0	0	12882	0	0	0	0	0	0	0	0	0	0	0	0	0	0	0	0	0	0	0	0	0	0	TATGCAGAGGAACCCCCAGATGCCCCAGTACACTTCCCCTCAGCCTGGCTCGGCCTTATCCCCACGTCAGCCGTCTGGAGGACAGATG--------|CGTGGGCTCCTACCAGCAGAACTCCATTAGGGGAGCTACGGCCCCCAGGGCAGTCAGTATGGCCCACAAGGTAAGTGTGCTACCCCTTTAGAAGGAAAGAGAGGTACTGTGTTAACGGCTG
Arid1a	Del 5|0	0	0	0	0	0	7886	0	0	0	0	0	0	0	0	0	0	0	0	0	0	0	0	0	0	0	0	TATGCAGAGGAACCCCCAGATGCCCCAGTACACTTCCCCTCAGCCTGGCTCGGCCTTATCCCCACGTCAGCCGTCTGGAGGACAGATGCAC-----|CGTGGGCTCCTACCAGCAGAACTCCATTAGGGGAGCTACGGCCCCCAGGGCAGTCAGTATGGCCCACAAGGTAAGTGTGCTACCCCTTTAGAAGGAAAGAGAGGTACTGTGTTAACGGCTG
Arid1a	Del 3|0	0	0	0	0	0	0	0	3350	0	0	0	0	0	0	0	0	0	0	0	0	0	0	0	0	0	0	TATGCAGAGGAACCCCCAGATGCCCCAGTACACTTCCCCTCAGCCTGGCTCGGCCTTATCCCCACGTCAGCCGTCTGGAGGACAGATGCACTC---|CGTGGGCTCCTACCAGCAGAACTCCATTAGGGGAGCTACGGCCCCCAGGGCAGTCAGTATGGCCCACAAGGTAAGTGTGCTACCCCTTTAGAAGGAAAGAGAGGTACTGTGTTAACGGCTG
Arid1a	Del 0|5	0	0	0	0	0	0	0	3279	0	0	0	0	0	0	0	0	0	0	0	0	0	0	0	0	0	0	TATGCAGAGGAACCCCCAGATGCCCCAGTACACTTCCCCTCAGCCTGGCTCGGCCTTATCCCCACGTCAGCCGTCTGGAGGACAGATGCACTCGGG|-----GCTCCTACCAGCAGAACTCCATTAGGGGAGCTACGGCCCCCAGGGCAGTCAGTATGGCCCACAAGGTAAGTGTGCTACCCCTTTAGAAGGAAAGAGAGGTACTGTGTTAACGGCTG
Arid1a	Del 0|4	0	0	0	0	0	0	0	0	4648	0	0	0	0	0	0	0	0	0	0	0	0	0	0	0	0	0	TATGCAGAGGAACCCCCAGATGCCCCAGTACACTTCCCCTCAGCCTGGCTCGGCCTTATCCCCACGTCAGCCGTCTGGAGGACAGATGCACTCGGG|----GGCTCCTACCAGCAGAACTCCATTAGGGGAGCTACGGCCCCCAGGGCAGTCAGTATGGCCCACAAGGTAAGTGTGCTACCCCTTTAGAAGGAAAGAGAGGTACTGTGTTAACGGCTG
Arid1a	Del 4|0	0	0	0	0	0	0	0	0	0	7146	0	0	0	0	0	0	8515	0	0	0	0	0	0	0	0	0	TATGCAGAGGAACCCCCAGATGCCCCAGTACACTTCCCCTCAGCCTGGCTCGGCCTTATCCCCACGTCAGCCGTCTGGAGGACAGATGCACT----|CGTGGGCTCCTACCAGCAGAACTCCATTAGGGGAGCTACGGCCCCCAGGGCAGTCAGTATGGCCCACAAGGTAAGTGTGCTACCCCTTTAGAAGGAAAGAGAGGTACTGTGTTAACGGCTG
Arid1a	Del 30|0	0	0	0	0	0	0	0	0	0	6532	0	0	0	0	0	0	0	0	0	0	0	0	0	0	0	0	TATGCAGAGGAACCCCCAGATGCCCCAGTACACTTCCCCTCAGCCTGGCTCGGCCTTATCCCCACG------------------------------|CGTGGGCTCCTACCAGCAGAACTCCATTAGGGGAGCTACGGCCCCCAGGGCAGTCAGTATGGCCCACAAGGTAAGTGTGCTACCCCTTTAGAAGGAAAGAGAGGTACTGTGTTAACGGCTG
Arid1a	Del 18|0	0	0	0	0	0	0	0	0	0	0	7081	0	0	0	0	0	0	0	0	0	0	0	0	0	0	0	TATGCAGAGGAACCCCCAGATGCCCCAGTACACTTCCCCTCAGCCTGGCTCGGCCTTATCCCCACGTCAGCCGTCTGG------------------|CGTGGGCTCCTACCAGCAGAACTCCATTAGGGGAGCTACGGCCCCCAGGGCAGTCAGTATGGCCCACAAGGTAAGTGTGCTACCCCTTTAGAAGGAAAGAGAGGTACTGTGTTAACGGCTG
Arid1a	Del 12|0	0	0	0	0	0	0	0	0	0	0	0	0	0	0	0	12774	0	0	0	0	0	0	0	0	0	0	TATGCAGAGGAACCCCCAGATGCCCCAGTACACTTCCCCTCAGCCTGGCTCGGCCTTATCCCCACGTCAGCCGTCTGGAGGACA------------|CGTGGGCTCCTACCAGCAGAACTCCATTAGGGGAGCTACGGCCCCCAGGGCAGTCAGTATGGCCCACAAGGTAAGTGTGCTACCCCTTTAGAAGGAAAGAGAGGTACTGTGTTAACGGCTG
Arid1a	Del 18|0	0	0	0	0	0	0	0	0	0	0	0	0	0	0	0	0	0	0	2839	0	0	0	0	0	0	0	TATGCAGAGGAACCCCCAGATGCCCCAGTACACTTCCCCTCAGCCTGGCTCGGCCTTATCCCCACGTCAGCCGTCTG------------------A|CGTGGGCTCCTACCAGCAGAACTCCATTAGGGGAGCTACGGCCCCCAGGGCAGTCAGTATGGCCCACAAGGTAAGTGTGCTACCCCTTTAGAAGGAAAGAGAGGTACTGTGTTAACGGCTG
Arid1a	Del 8|4	0	0	0	0	0	0	0	0	0	0	0	0	0	0	0	0	0	0	0	0	0	0	7057	3893	1263	1742	TATGCAGAGGAACCCCCAGATGCCCCAGTACACTTCCCCTCAGCCTGGCTCGGCCTTATCCCCACGTCAGCCGTCTGGAGGACAGATG--------|----GGCTCCTACCAGCAGAACTCCATTAGGGGAGCTACGGCCCCCAGGGCAGTCAGTATGGCCCACAAGGTAAGTGTGCTACCCCTTTAGAAGGAAAGAGAGGTACTGTGTTAACGGCTG
Arid1b	WT	1988	6936	3132	3082	8477	8681	7169	5366	4952	3776	7137	10331	6813	7585	5094	1845	6475	3044	3529	12226	4598	10217	27194	29080	24108	31328	CTTGGGCAAGGACCTAGGCGCCCAGTACGCCGCTGCCAGCCCGGCCTGGGCGGCCGCGCAACAAAGGAGTCACCCGGCGATGAGCCCCGGCACCCCCG|GACCGACCATGGGCAGATCCCAGGTAACCCCCGCGCCCGGCCGGGCCTGCTTCCGCCCGGGCCTCGCGCCGCGAGCCCGACTTTCTTTCTTCGCCGGGTACTTTTCCCGGCGGTTG
Arid1b	Del 1|0	6657	5215	0	6730	0	0	2666	5279	10629	5292	2851	0	629	2759	2523	2763	4310	1183	1150	6182	1464	0	11395	11028	13894	17928	CTTGGGCAAGGACCTAGGCGCCCAGTACGCCGCTGCCAGCCCGGCCTGGGCGGCCGCGCAACAAAGGAGTCACCCGGCGATGAGCCCCGGCACCCCC-|GACCGACCATGGGCAGATCCCAGGTAACCCCCGCGCCCGGCCGGGCCTGCTTCCGCCCGGGCCTCGCGCCGCGAGCCCGACTTTCTTTCTTCGCCGGGTACTTTTCCCGGCGGTTG
Arid1b	Del 2|4	0	0	1527	0	0	0	0	0	0	0	0	0	0	0	0	0	0	0	0	0	0	0	0	0	0	0	CTTGGGCAAGGACCTAGGCGCCCAGTACGCCGCTGCCAGCCCGGCCTGGGCGGCCGCGCAACAAAGGAGTCACCCGGCGATGAGCCCCGGCACCCC--|----GACCATGGGCAGATCCCAGGTAACCCCCGCGCCCGGCCGGGCCTGCTTCCGCCCGGGCCTCGCGCCGCGAGCCCGACTTTCTTTCTTCGCCGGGTACTTTTCCCGGCGGTTG
Arid1b	Del 0|5	0	0	1521	0	0	4764	1357	0	0	0	0	0	0	0	0	0	0	0	0	0	895	0	0	0	0	0	CTTGGGCAAGGACCTAGGCGCCCAGTACGCCGCTGCCAGCCCGGCCTGGGCGGCCGCGCAACAAAGGAGTCACCCGGCGATGAGCCCCGGCACCCCCG|-----ACCATGGGCAGATCCCAGGTAACCCCCGCGCCCGGCCGGGCCTGCTTCCGCCCGGGCCTCGCGCCGCGAGCCCGACTTTCTTTCTTCGCCGGGTACTTTTCCCGGCGGTTG
Arid1b	Del 5|0	0	0	0	7833	0	0	0	0	0	0	0	0	0	0	0	0	0	0	0	0	0	0	0	0	0	0	CTTGGGCAAGGACCTAGGCGCCCAGTACGCCGCTGCCAGCCCGGCCTGGGCGGCCGCGCAACAAAGGAGTCACCCGGCGATGAGCCCCGGCAC-----|GACCGACCATGGGCAGATCCCAGGTAACCCCCGCGCCCGGCCGGGCCTGCTTCCGCCCGGGCCTCGCGCCGCGAGCCCGACTTTCTTTCTTCGCCGGGTACTTTTCCCGGCGGTTG
Arid1b	Del 4|4	0	0	0	0	927	0	0	0	0	0	0	0	0	0	0	0	0	0	0	0	0	0	0	0	0	0	CTTGGGCAAGGACCTAGGCGCCCAGTACGCCGCTGCCAGCCCGGCCTGGGCGGCCGCGCAACAAAGGAGTCACCCGGCGATGAGCCCCGGCACC----|----GACCATGGGCAGATCCCAGGTAACCCCCGCGCCCGGCCGGGCCTGCTTCCGCCCGGGCCTCGCGCCGCGAGCCCGACTTTCTTTCTTCGCCGGGTACTTTTCCCGGCGGTTG
Arid1b	Del 16|11	0	0	0	0	798	0	0	0	0	0	0	0	0	0	0	0	0	0	0	0	0	0	0	0	0	0	CTTGGGCAAGGACCTAGGCGCCCAGTACGCCGCTGCCAGCCCGGCCTGGGCGGCCGCGCAACAAAGGAGTCACCCGGCGATG----------------|-----------GGCAGATCCCAGGTAACCCCCGCGCCCGGCCGGGCCTGCTTCCGCCCGGGCCTCGCGCCGCGAGCCCGACTTTCTTTCTTCGCCGGGTACTTTTCCCGGCGGTTG
Arid1b	Del 1|8	0	0	0	0	0	0	904	0	0	0	0	0	0	0	0	0	0	0	0	0	0	0	0	0	0	0	CTTGGGCAAGGACCTAGGCGCCCAGTACGCCGCTGCCAGCCCGGCCTGGGCGGCCGCGCAACAAAGGAGTCACCCGGCGATGAGCCCCGGCACCCCC-|--------ATGGGCAGATCCCAGGTAACCCCCGCGCCCGGCCGGGCCTGCTTCCGCCCGGGCCTCGCGCCGCGAGCCCGACTTTCTTTCTTCGCCGGGTACTTTTCCCGGCGGTTG
Arid1b	Del 0|2	0	0	0	0	0	0	0	0	0	3308	0	0	0	0	0	0	0	0	0	0	0	0	0	0	0	0	CTTGGGCAAGGACCTAGGCGCCCAGTACGCCGCTGCCAGCCCGGCCTGGGCGGCCGCGCAACAAAGGAGTCACCCGGCGATGAGCCCCGGCACCCCCG|--CCGACCATGGGCAGATCCCAGGTAACCCCCGCGCCCGGCCGGGCCTGCTTCCGCCCGGGCCTCGCGCCGCGAGCCCGACTTTCTTTCTTCGCCGGGTACTTTTCCCGGCGGTTG
Arid1b	Del 4|21	0	0	0	0	0	0	0	0	0	0	940	0	0	0	0	0	0	0	0	0	0	0	0	0	0	0	CTTGGGCAAGGACCTAGGCGCCCAGTACGCCGCTGCCAGCCCGGCCTGGGCGGCCGCGCAACAAAGGAGTCACCCGGCGATGAGCCCCGGCACCCCC-|---------------------AGGTAACCCCCGCGCCCGGCCGGGCCTGCTTCCGCCCGGGCCTCGCGCCGCGAGCCCGACTTTCTTTCTTCGCCGGGTACTTTTCCCGGCGGTTG
Arid1b	Del 1|20	0	0	0	0	0	0	0	0	0	0	0	0	0	0	0	1108	0	0	0	0	0	0	0	0	0	0	CTTGGGCAAGGACCTAGGCGCCCAGTACGCCGCTGCCAGCCCGGCCTGGGCGGCCGCGCAACAAAGGAGTCACCCGGCGATGAGCCCCGGCACCCCCG|--------------------AGGTAACCCCCGCGCCCGGCCGGGCCTGCTTCCGCCCGGGCCTCGCGCCGCGAGCCCGACTTTCTTTCTTCGCCGGGTACTTTTCCCGGCGGTTG
Arid1b	Del 44|4	0	0	0	0	0	0	0	0	0	0	0	0	0	0	0	0	0	772	0	0	0	0	0	0	0	0	CTTGGGCAAGGACCTAGGCGCCCAGTACGCCGCTGCCAGCCCGGCCTGGGCGGC--------------------------------------------|----GACCATGGGCAGATCCCAGGTAACCCCCGCGCCCGGCCGGGCCTGCTTCCGCCCGGGCCTCGCGCCGCGAGCCCGACTTTCTTTCTTCGCCGGGTACTTTTCCCGGCGGTTG
Arid1b	Del 3|0	0	0	0	0	0	0	0	0	0	0	0	0	0	0	0	0	0	600	0	0	0	0	0	0	0	0	CTTGGGCAAGGACCTAGGCGCCCAGTACGCCGCTGCCAGCCCGGCCTGGGCGGCCGCGCAACAAAGGAGTCACCCGGCGATGAGCCCCGGCACCC---|GACCGACCATGGGCAGATCCCAGGTAACCCCCGCGCCCGGCCGGGCCTGCTTCCGCCCGGGCCTCGCGCCGCGAGCCCGACTTTCTTTCTTCGCCGGGTACTTTTCCCGGCGGTTG
Arid1b	Del 10|8	0	0	0	0	0	0	0	0	0	0	0	0	0	0	0	0	0	0	629	0	0	0	0	0	0	0	CTTGGGCAAGGACCTAGGCGCCCAGTACGCCGCTGCCAGCCCGGCCTGGGCGGCCGCGCAACAAAGGAGTCACCCGGCGATGAGCCCC----------|--------ATGGGCAGATCCCAGGTAACCCCCGCGCCCGGCCGGGCCTGCTTCCGCCCGGGCCTCGCGCCGCGAGCCCGACTTTCTTTCTTCGCCGGGTACTTTTCCCGGCGGTTG
Arid1b	Del 20|14	0	0	0	0	0	0	0	0	0	0	0	0	0	0	0	0	0	0	0	1899	0	0	0	0	0	0	CTTGGGCAAGGACCTAGGCGCCCAGTACGCCGCTGCCAGCCCGGCCTGGGCGGCCGCGCAACAAAGGAGTCACCCGGC--------------------|--------------AGATCCCAGGTAACCCCCGCGCCCGGCCGGGCCTGCTTCCGCCCGGGCCTCGCGCCGCGAGCCCGACTTTCTTTCTTCGCCGGGTACTTTTCCCGGCGGTTG
Arid1b	Del 0|4	0	0	0	0	0	0	0	0	0	0	0	0	0	0	0	0	0	0	0	0	678	0	0	0	0	0	CTTGGGCAAGGACCTAGGCGCCCAGTACGCCGCTGCCAGCCCGGCCTGGGCGGCCGCGCAACAAAGGAGTCACCCGGCGATGAGCCCCGGCACCCCCG|----GACCATGGGCAGATCCCAGGTAACCCCCGCGCCCGGCCGGGCCTGCTTCCGCCCGGGCCTCGCGCCGCGAGCCCGACTTTCTTTCTTCGCCGGGTACTTTTCCCGGCGGTTG
Arid1b	Del 1|2	0	0	0	0	0	0	0	0	0	0	0	0	0	0	0	0	0	0	0	0	417	0	0	0	0	0	CTTGGGCAAGGACCTAGGCGCCCAGTACGCCGCTGCCAGCCCGGCCTGGGCGGCCGCGCAACAAAGGAGTCACCCGGCGATGAGCCCCGGCACCCCC-|--CCGACCATGGGCAGATCCCAGGTAACCCCCGCGCCCGGCCGGGCCTGCTTCCGCCCGGGCCTCGCGCCGCGAGCCCGACTTTCTTTCTTCGCCGGGTACTTTTCCCGGCGGTTG
Arid2	WT	6599	17361	18090	21534	20517	31509	22796	24120	25209	13877	28296	40439	13034	19053	22441	31159	8174	36884	31012	32700	22225	21914	23162	59788	48386	57140	CAGCTTAACATAGGGCTTCCTGTGGTATATAATGTCTTTATTCCTCTCTCTCTCTCTTTTAGGCTAAATGCTCATTTTGAAGTAAATCCAGAC|TGTTCCGTCTCTCGGGCAGAAATGTATTCAGAGTACCTCTCAACTTGCAGTAAATTAGCTCGCGGTGGCATCCTCACATCAACTGGGTTTTATAAGTGTCTTAGGTAACTCGCACAGCTC
Arid2	Del 2|24	9206	0	0	0	0	0	0	0	0	0	0	0	0	0	0	0	0	0	0	0	0	0	0	0	0	0	CAGCTTAACATAGGGCTTCCTGTGGTATATAATGTCTTTATTCCTCTCTCTCTCTCTTTTAGGCTAAATGCTCATTTTGAAGTAAATCCAG-- | ------------------------TATTCAGAGTACCTCTCAACTTGCAGTAAATTAGCTCGCGGTGGCATCCTCACATCAACTGGGTTTTATAAGTGTCTTAGGTAACTCGCACAGCTC
Arid2	Del 2|11	8922	0	0	0	0	0	0	0	0	0	0	0	0	0	0	0	0	0	0	0	0	0	0	0	0	0	CAGCTTAACATAGGGCTTCCTGTGGTATATAATGTCTTTATTCCTCTCTCTCTCTCTTTTAGGCTAAATGCTCATTTTGAAGTAAATCCAG-- | -----------TCGGGCAGAAATGTATTCAGAGTACCTCTCAACTTGCAGTAAATTAGCTCGCGGTGGCATCCTCACATCAACTGGGTTTTATAAGTGTCTTAGGTAACTCGCACAGCTC
Arid2	Del 0|4 (D5 I1T)	2102	0	0	0	0	0	0	0	0	0	0	0	0	0	0	0	0	0	0	0	0	0	0	0	0	0	CAGCTTAACATAGGGCTTCCTGTGGTATATAATGTCTTTATTCCTCTCTCTCTCTCTTTTAGGCTAAATGCTCATTTTGAAGTAAATCCAGAC|T----CGTCTCTCGGGCAGAAATGTATTCAGAGTACCTCTCAACTTGCAGTAAATTAGCTCGCGGTGGCATCCTCACATCAACTGGGTTTTATAAGTGTCTTAGGTAACTCGCACAGCTC
Arid2	Ins 1 T	0	1809	9688	0	0	0	4485	0	0	7359	4960	0	0	5820	0	0	12869	0	3512	0	0	0	0	0	0	0	CAGCTTAACATAGGGCTTCCTGTGGTATATAATGTCTTTATTCCTCTCTCTCTCTCTTTTAGGCTAAATGCTCATTTTGAAGTAAATCCAGAC|{T}TGTTCCGTCTCTCGGGCAGAAATGTATTCAGAGTACCTCTCAACTTGCAGTAAATTAGCTCGCGGTGGCATCCTCACATCAACTGGGTTTTATAAGTGTCTTAGGTAACTCGCACAGCTC
Arid2	Del 20|11	0	1321	0	0	0	0	0	0	0	0	0	0	0	0	0	0	0	0	0	0	0	0	0	0	0	0	CAGCTTAACATAGGGCTTCCTGTGGTATATAATGTCTTTATTCCTCTCTCTCTCTCTTTTAGGCTAAATGCTC--------------------|-----------TCGGGCAGAAATGTATTCAGAGTACCTCTCAACTTGCAGTAAATTAGCTCGCGGTGGCATCCTCACATCAACTGGGTTTTATAAGTGTCTTAGGTAACTCGCACAGCTC
Arid2	Del 0|1	0	0	10514	12346	0	0	0	0	0	0	0	0	0	0	0	0	0	0	0	0	0	0	0	0	0	0	CAGCTTAACATAGGGCTTCCTGTGGTATATAATGTCTTTATTCCTCTCTCTCTCTCTTTTAGGCTAAATGCTCATTTTGAAGTAAATCCAGAC|-GTTCCGTCTCTCGGGCAGAAATGTATTCAGAGTACCTCTCAACTTGCAGTAAATTAGCTCGCGGTGGCATCCTCACATCAACTGGGTTTTATAAGTGTCTTAGGTAACTCGCACAGCTC
Arid2	Del 0|2	0	0	0	0	3115	0	0	0	0	0	0	0	15995	0	5828	0	0	0	0	0	5621	5933	2528	5544	5937	7752	CAGCTTAACATAGGGCTTCCTGTGGTATATAATGTCTTTATTCCTCTCTCTCTCTCTTTTAGGCTAAATGCTCATTTTGAAGTAAATCCAGAC|--TTCCGTCTCTCGGGCAGAAATGTATTCAGAGTACCTCTCAACTTGCAGTAAATTAGCTCGCGGTGGCATCCTCACATCAACTGGGTTTTATAAGTGTCTTAGGTAACTCGCACAGCTC
Arid2	Del 0|7	0	0	0	0	2949	0	0	0	0	0	0	0	0	0	0	0	0	0	0	0	0	0	0	0	0	0	CAGCTTAACATAGGGCTTCCTGTGGTATATAATGTCTTTATTCCTCTCTCTCTCTCTTTTAGGCTAAATGCTCATTTTGAAGTAAATCCAGAC|-------TCTCTCGGGCAGAAATGTATTCAGAGTACCTCTCAACTTGCAGTAAATTAGCTCGCGGTGGCATCCTCACATCAACTGGGTTTTATAAGTGTCTTAGGTAACTCGCACAGCTC
Arid2	Del 0|4	0	0	0	0	0	0	0	3744	0	0	0	0	0	0	0	0	0	0	0	0	0	0	0	0	0	0	CAGCTTAACATAGGGCTTCCTGTGGTATATAATGTCTTTATTCCTCTCTCTCTCTCTTTTAGGCTAAATGCTCATTTTGAAGTAAATCCAGAC|----CCGTCTCTCGGGCAGAAATGTATTCAGAGTACCTCTCAACTTGCAGTAAATTAGCTCGCGGTGGCATCCTCACATCAACTGGGTTTTATAAGTGTCTTAGGTAACTCGCACAGCTC
Arid2	Del 17|10	0	0	0	0	0	0	0	0	8524	0	0	0	0	0	0	0	0	0	0	0	0	0	0	0	0	0	CAGCTTAACATAGGGCTTCCTGTGGTATATAATGTCTTTATTCCTCTCTCTCTCTCTTTTAGGCTAAATGCTCATT-----------------|----------CTCGGGCAGAAATGTATTCAGAGTACCTCTCAACTTGCAGTAAATTAGCTCGCGGTGGCATCCTCACATCAACTGGGTTTTATAAGTGTCTTAGGTAACTCGCACAGCTC
Arid2	Del 2|2	0	0	0	0	0	0	0	0	0	6982	0	0	0	0	8792	0	0	0	0	0	0	0	0	0	0	0	CAGCTTAACATAGGGCTTCCTGTGGTATATAATGTCTTTATTCCTCTCTCTCTCTCTTTTAGGCTAAATGCTCATTTTGAAGTAAATCCAG--|--TTCCGTCTCTCGGGCAGAAATGTATTCAGAGTACCTCTCAACTTGCAGTAAATTAGCTCGCGGTGGCATCCTCACATCAACTGGGTTTTATAAGTGTCTTAGGTAACTCGCACAGCTC
Arid2	Del 6|3	0	0	0	0	0	0	0	0	0	0	0	0	5562	0	0	0	0	0	0	0	0	0	0	0	0	0	CAGCTTAACATAGGGCTTCCTGTGGTATATAATGTCTTTATTCCTCTCTCTCTCTCTTTTAGGCTAAATGCTCATTTTGAAGTAAAT------|---TCCGTCTCTCGGGCAGAAATGTATTCAGAGTACCTCTCAACTTGCAGTAAATTAGCTCGCGGTGGCATCCTCACATCAACTGGGTTTTATAAGTGTCTTAGGTAACTCGCACAGCTC
Arid2	Ins 1 G	0	0	0	0	0	0	0	0	0	0	0	0	0	7019	0	0	0	0	0	0	0	0	0	0	0	0	CAGCTTAACATAGGGCTTCCTGTGGTATATAATGTCTTTATTCCTCTCTCTCTCTCTTTTAGGCTAAATGCTCATTTTGAAGTAAATCCAGAC|{G}TGTTCCGTCTCTCGGGCAGAAATGTATTCAGAGTACCTCTCAACTTGCAGTAAATTAGCTCGCGGTGGCATCCTCACATCAACTGGGTTTTATAAGTGTCTTAGGTAACTCGCACAGCTC
Arid2	Del 2|0	0	0	0	0	0	0	0	0	0	0	0	0	0	0	0	0	12918	0	0	0	0	0	0	0	0	0	CAGCTTAACATAGGGCTTCCTGTGGTATATAATGTCTTTATTCCTCTCTCTCTCTCTTTTAGGCTAAATGCTCATTTTGAAGTAAATCCAG--|TGTTCCGTCTCTCGGGCAGAAATGTATTCAGAGTACCTCTCAACTTGCAGTAAATTAGCTCGCGGTGGCATCCTCACATCAACTGGGTTTTATAAGTGTCTTAGGTAACTCGCACAGCTC
Arid2	Del 0|5	0	0	0	0	0	0	0	0	0	0	0	0	0	0	0	0	0	0	0	0	4753	0	0	0	0	0	CAGCTTAACATAGGGCTTCCTGTGGTATATAATGTCTTTATTCCTCTCTCTCTCTCTTTTAGGCTAAATGCTCATTTTGAAGTAAATCCAGAC|-----CGTCTCTCGGGCAGAAATGTATTCAGAGTACCTCTCAACTTGCAGTAAATTAGCTCGCGGTGGCATCCTCACATCAACTGGGTTTTATAAGTGTCTTAGGTAACTCGCACAGCTC
Atm	WT	30170	29323	46688	45857	40916	47965	32003	45482	38449	45895	30328	32340	51776	54460	43008	32923	36326	40263	41902	29430	28249	43476	40631	34227	46977	54349	TCTGTCATTCATTGGTGAAGAAATCAAAGTAGAAAAACATTGAGCGACTGCTCTAAAGTCCTATTATTCCCATTTTCTTAAACATCATGTTTTTCCTTTCTGCAGGTTTTAGAGAAAGTCTCCGAATC|GTTTGGATGTAGAAGTTTAGAAGACTTCATGATTTCTCACCTAGACTACCTGGTTTTGGAATGGCTGAACCTTCAAGATACTG
Atm	Ins 1 C	44835	0	0	0	0	0	0	0	0	0	0	0	0	0	0	0	0	0	0	0	0	0	0	0	0	0	TCTGTCATTCATTGGTGAAGAAATCAAAGTAGAAAAACATTGAGCGACTGCTCTAAAGTCCTATTATTCCCATTTTCTTAAACATCATGTTTTTCCTTTCTGCAGGTTTTAGAGAAAGTCTCCGAATC{C}|GTTTGGATGTAGAAGTTTAGAAGACTTCATGATTTCTCACCTAGACTACCTGGTTTTGGAATGGCTGAACCTTCAAGATACTG
Atm	Del 4|0 Ins 1G	0	3418	0	0	0	0	0	0	0	0	0	0	0	0	0	0	0	0	0	0	0	0	0	0	0	0	TCTGTCATTCATTGGTGAAGAAATCAAAGTAGAAAAACATTGAGCGACTGCTCTAAAGTCCTATTATTCCCATTTTCTTAAACATCATGTTTTTCCTTTCTGCAGGTTTTAGAGAAAGTCTCCG----{G}|GTTTGGATGTAGAAGTTTAGAAGACTTCATGATTTCTCACCTAGACTACCTGGTTTTGGAATGGCTGAACCTTCAAGATACTG
Atm	Del 1|0	0	0	0	0	0	0	7331	0	18549	0	6984	0	0	0	0	0	0	0	0	0	0	0	0	0	0	0	TCTGTCATTCATTGGTGAAGAAATCAAAGTAGAAAAACATTGAGCGACTGCTCTAAAGTCCTATTATTCCCATTTTCTTAAACATCATGTTTTTCCTTTCTGCAGGTTTTAGAGAAAGTCTCCGAAT-|GTTTGGATGTAGAAGTTTAGAAGACTTCATGATTTCTCACCTAGACTACCTGGTTTTGGAATGGCTGAACCTTCAAGATACTG
Atm	Del 15|21	0	0	0	0	0	0	6996	0	0	0	0	0	0	0	0	0	0	0	0	0	0	0	0	0	0	0	TCTGTCATTCATTGGTGAAGAAATCAAAGTAGAAAAACATTGAGCGACTGCTCTAAAGTCCTATTATTCCCATTTTCTTAAACATCATGTTTTTCCTTTCTGCAGGTTTTAGA---------------|---------------------AGACTTCATGATTTCTCACCTAGACTACCTGGTTTTGGAATGGCTGAACCTTCAAGATACTG
Atm	Del 0|3	0	0	0	0	0	0	0	6437	0	0	0	0	0	0	0	0	0	0	0	0	6763	0	0	0	0	0	TCTGTCATTCATTGGTGAAGAAATCAAAGTAGAAAAACATTGAGCGACTGCTCTAAAGTCCTATTATTCCCATTTTCTTAAACATCATGTTTTTCCTTTCTGCAGGTTTTAGAGAAAGTCTCCGAATC|---TGGATGTAGAAGTTTAGAAGACTTCATGATTTCTCACCTAGACTACCTGGTTTTGGAATGGCTGAACCTTCAAGATACTG
Atm	Del 5|0	0	0	0	0	0	0	0	0	0	0	6971	0	0	0	0	0	0	0	0	0	0	0	0	0	0	0	TCTGTCATTCATTGGTGAAGAAATCAAAGTAGAAAAACATTGAGCGACTGCTCTAAAGTCCTATTATTCCCATTTTCTTAAACATCATGTTTTTCCTTTCTGCAGGTTTTAGAGAAAGTCTCC-----|GTTTGGATGTAGAAGTTTAGAAGACTTCATGATTTCTCACCTAGACTACCTGGTTTTGGAATGGCTGAACCTTCAAGATACTG
Atm	Del 4|0	0	0	0	0	0	0	0	0	0	0	0	16542	0	0	10330	0	0	0	0	0	0	0	0	0	0	0	TCTGTCATTCATTGGTGAAGAAATCAAAGTAGAAAAACATTGAGCGACTGCTCTAAAGTCCTATTATTCCCATTTTCTTAAACATCATGTTTTTCCTTTCTGCAGGTTTTAGAGAAAGTCTCCG----|GTTTGGATGTAGAAGTTTAGAAGACTTCATGATTTCTCACCTAGACTACCTGGTTTTGGAATGGCTGAACCTTCAAGATACTG
Atm	Del 0|6	0	0	0	0	0	0	0	0	0	0	0	0	0	7782	0	0	0	0	0	0	0	0	0	0	0	0	TCTGTCATTCATTGGTGAAGAAATCAAAGTAGAAAAACATTGAGCGACTGCTCTAAAGTCCTATTATTCCCATTTTCTTAAACATCATGTTTTTCCTTTCTGCAGGTTTTAGAGAAAGTCTCCGAATC|------ATGTAGAAGTTTAGAAGACTTCATGATTTCTCACCTAGACTACCTGGTTTTGGAATGGCTGAACCTTCAAGATACTG
Atm	Del 9|4	0	0	0	0	0	0	0	0	0	0	0	0	0	0	0	19578	0	0	0	0	0	0	0	0	0	0	TCTGTCATTCATTGGTGAAGAAATCAAAGTAGAAAAACATTGAGCGACTGCTCTAAAGTCCTATTATTCCCATTTTCTTAAACATCATGTTTTTCCTTTCTGCAGGTTTTAGAGAAAGT---------|----GGATGTAGAAGTTTAGAAGACTTCATGATTTCTCACCTAGACTACCTGGTTTTGGAATGGCTGAACCTTCAAGATACTG
Atm	Del 0|4	0	0	0	0	0	0	0	0	0	0	0	0	0	0	0	0	21581	0	0	0	5937	0	0	0	0	0	TCTGTCATTCATTGGTGAAGAAATCAAAGTAGAAAAACATTGAGCGACTGCTCTAAAGTCCTATTATTCCCATTTTCTTAAACATCATGTTTTTCCTTTCTGCAGGTTTTAGAGAAAGTCTCCGAATC|----GGATGTAGAAGTTTAGAAGACTTCATGATTTCTCACCTAGACTACCTGGTTTTGGAATGGCTGAACCTTCAAGATACTG
Axin1	WT	1577	6339	3136	4460	9444	4829	4656	8418	13920	16324	9570	7733	1637	13159	11182	2787	18956	3098	10639	15754	4543	8611	29006	37158	86903	74025	GTTCTGAGGCCCGTCATCTGGTCCCTGCCTCAGCCAATAGGCGGCAGGAGCCCGAGCTGCAGCCTAGAGTCACGCTTCTGCCTCCCAGCCACACAGTGGCCAAGAGCAGG|GACCGGCTTCCTAGAGTGGCTGAAAGTGCTCGGACGGACAGCCAAGCCCATCATGGCGGACAGCGGGACAGTGGGTCGTGATCAGGCACTTGGAGCCAGGCAGGTGAGGTAA
Axin1	Del 54|5	2765	0	0	0	0	0	0	0	0	0	0	0	0	0	0	0	0	0	0	0	0	0	0	0	0	0	GTTCTGAGGCCCGTCATCTGGTCCCTGCCTCAGCCAATAGGCGGCAGGAGCCCGAG------------------------------------------------------|-----GCTTCCTAGAGTGGCTGAAAGTGCTCGGACGGACAGCCAAGCCCATCATGGCGGACAGCGGGACAGTGGGTCGTGATCAGGCACTTGGAGCCAGGCAGGTGAGGTAA
Axin1	Del 1|0	0	3730	1637	0	0	0	0	2447	6693	0	0	4132	12323	0	6366	0	0	4548	0	8393	1367	2647	18040	14641	57216	54083	GTTCTGAGGCCCGTCATCTGGTCCCTGCCTCAGCCAATAGGCGGCAGGAGCCCGAGCTGCAGCCTAGAGTCACGCTTCTGCCTCCCAGCCACACAGTGGCCAAGAGCAG-|GACCGGCTTCCTAGAGTGGCTGAAAGTGCTCGGACGGACAGCCAAGCCCATCATGGCGGACAGCGGGACAGTGGGTCGTGATCAGGCACTTGGAGCCAGGCAGGTGAGGTAA
Axin1	Del 4|0	0	1034	0	0	0	2522	0	0	0	0	0	0	0	0	0	0	0	0	0	0	0	0	5103	4142	14651	16767	GTTCTGAGGCCCGTCATCTGGTCCCTGCCTCAGCCAATAGGCGGCAGGAGCCCGAGCTGCAGCCTAGAGTCACGCTTCTGCCTCCCAGCCACACAGTGGCCAAGAG----|GACCGGCTTCCTAGAGTGGCTGAAAGTGCTCGGACGGACAGCCAAGCCCATCATGGCGGACAGCGGGACAGTGGGTCGTGATCAGGCACTTGGAGCCAGGCAGGTGAGGTAA
Axin1	Del 6|0	0	1008	0	0	0	0	0	0	0	0	0	0	0	0	0	0	0	0	0	0	0	0	0	0	0	0	GTTCTGAGGCCCGTCATCTGGTCCCTGCCTCAGCCAATAGGCGGCAGGAGCCCGAGCTGCAGCCTAGAGTCACGCTTCTGCCTCCCAGCCACACAGTGGCCAAG------|GACCGGCTTCCTAGAGTGGCTGAAAGTGCTCGGACGGACAGCCAAGCCCATCATGGCGGACAGCGGGACAGTGGGTCGTGATCAGGCACTTGGAGCCAGGCAGGTGAGGTAA
Axin1	Del 2|1	0	0	1505	0	0	0	0	0	0	0	0	0	0	0	0	0	0	0	0	0	0	0	0	0	0	0	GTTCTGAGGCCCGTCATCTGGTCCCTGCCTCAGCCAATAGGCGGCAGGAGCCCGAGCTGCAGCCTAGAGTCACGCTTCTGCCTCCCAGCCACACAGTGGCCAAGAGCA--|-ACCGGCTTCCTAGAGTGGCTGAAAGTGCTCGGACGGACAGCCAAGCCCATCATGGCGGACAGCGGGACAGTGGGTCGTGATCAGGCACTTGGAGCCAGGCAGGTGAGGTAA
Axin1	Del 5|0	0	0	0	6385	0	0	0	0	0	0	1955	0	0	0	0	0	0	0	0	0	0	0	0	0	0	0	GTTCTGAGGCCCGTCATCTGGTCCCTGCCTCAGCCAATAGGCGGCAGGAGCCCGAGCTGCAGCCTAGAGTCACGCTTCTGCCTCCCAGCCACACAGTGGCCAAGA-----|GACCGGCTTCCTAGAGTGGCTGAAAGTGCTCGGACGGACAGCCAAGCCCATCATGGCGGACAGCGGGACAGTGGGTCGTGATCAGGCACTTGGAGCCAGGCAGGTGAGGTAA
Axin1	Del 2|0	0	0	0	0	0	2734	0	2346	0	0	0	0	0	0	0	5089	0	0	0	3434	0	0	0	0	0	0	GTTCTGAGGCCCGTCATCTGGTCCCTGCCTCAGCCAATAGGCGGCAGGAGCCCGAGCTGCAGCCTAGAGTCACGCTTCTGCCTCCCAGCCACACAGTGGCCAAGAGCA--|GACCGGCTTCCTAGAGTGGCTGAAAGTGCTCGGACGGACAGCCAAGCCCATCATGGCGGACAGCGGGACAGTGGGTCGTGATCAGGCACTTGGAGCCAGGCAGGTGAGGTAA
Axin1	Del 11|0	0	0	0	0	0	0	1089	0	0	0	0	0	0	0	0	0	0	0	0	0	0	0	0	0	0	0	GTTCTGAGGCCCGTCATCTGGTCCCTGCCTCAGCCAATAGGCGGCAGGAGCCCGAGCTGCAGCCTAGAGTCACGCTTCTGCCTCCCAGCCACACAGTGG-----------|GACCGGCTTCCTAGAGTGGCTGAAAGTGCTCGGACGGACAGCCAAGCCCATCATGGCGGACAGCGGGACAGTGGGTCGTGATCAGGCACTTGGAGCCAGGCAGGTGAGGTAA
Axin1	Del 8|0	0	0	0	0	0	0	0	0	0	0	0	0	0	2996	0	0	0	0	0	0	0	0	0	0	0	0	GTTCTGAGGCCCGTCATCTGGTCCCTGCCTCAGCCAATAGGCGGCAGGAGCCCGAGCTGCAGCCTAGAGTCACGCTTCTGCCTCCCAGCCACACAGTGGCCA--------|GACCGGCTTCCTAGAGTGGCTGAAAGTGCTCGGACGGACAGCCAAGCCCATCATGGCGGACAGCGGGACAGTGGGTCGTGATCAGGCACTTGGAGCCAGGCAGGTGAGGTAA
Axin1	Del 16|0	0	0	0	0	0	0	0	0	0	0	0	0	0	0	0	4867	0	0	0	0	0	0	0	0	0	0	GTTCTGAGGCCCGTCATCTGGTCCCTGCCTCAGCCAATAGGCGGCAGGAGCCCGAGCTGCAGCCTAGAGTCACGCTTCTGCCTCCCAGCCACAC---------------|GACCGGCTTCCTAGAGTGGCTGAAAGTGCTCGGACGGACAGCCAAGCCCATCATGGCGGACAGCGGGACAGTGGGTCGTGATCAGGCACTTGGAGCCAGGCAGGTGAGGTAA
Axin1	Del 3|0	0	0	0	0	0	0	0	0	0	0	0	0	0	0	0	0	0	1420	0	0	0	0	0	0	0	0	GTTCTGAGGCCCGTCATCTGGTCCCTGCCTCAGCCAATAGGCGGCAGGAGCCCGAGCTGCAGCCTAGAGTCACGCTTCTGCCTCCCAGCCACACAGTGGCCAAGAGC---|GACCGGCTTCCTAGAGTGGCTGAAAGTGCTCGGACGGACAGCCAAGCCCATCATGGCGGACAGCGGGACAGTGGGTCGTGATCAGGCACTTGGAGCCAGGCAGGTGAGGTAA
Axin1	Del 25|11	0	0	0	0	0	0	0	0	0	0	0	0	0	0	0	0	0	0	0	0	843	0	0	0	0	0	GTTCTGAGGCCCGTCATCTGGTCCCTGCCTCAGCCAATAGGCGGCAGGAGCCCGAGCTGCAGCCTAGAGTCACGCTTCTGCCTCC-------------------------|-----------TAGAGTGGCTGAAAGTGCTCGGACGGACAGCCAAGCCCATCATGGCGGACAGCGGGACAGTGGGTCGTGATCAGGCACTTGGAGCCAGGCAGGTGAGGTAA
Cdkn2a	WT	7735	12732	13680	6287	16955	10637	14667	16014	6034	8494	10237	22527	2028	11060	12907	6036	5735	9646	17814	11592	15988	23215	63425	46636	53579	33412	CAGGTGATGATGATGGGCAACGTTCACGTAGCAGCTCTTCTGCTCAACTACGGTGCAGATTCGAACTGCGAGGACCCCACTACCTTCTCCCGCCC|GGTGCACGACGCAGCGCGGGAAGGCTTCCTGGACACGCTGGTGGTGCTGCACGGGTCAGGGGCTCGGCTGGATGTGCGCGATGCCTGGGGTCGCCTGCCGCTCGACTTGGCCCAAGA
Cdkn2a	Del 0|15	9750	0	0	0	0	0	0	0	0	0	0	0	0	0	0	0	0	0	0	0	0	0	0	0	0	0	CAGGTGATGATGATGGGCAACGTTCACGTAGCAGCTCTTCTGCTCAACTACGGTGCAGATTCGAACTGCGAGGACCCCACTACCTTCTCCCGCCC|G---------------CGGGAAGGCTTCCTGGACACGCTGGTGGTGCTGCACGGGTCAGGGGCTCGGCTGGATGTGCGCGATGCCTGGGGTCGCCTGCCGCTCGACTTGGCCCAAGA
Cdkn2a	Del 0|7	9409	0	0	0	0	0	1520	0	0	0	1217	0	0	0	0	0	0	0	3761	0	0	0	10451	3183	6483	4359	CAGGTGATGATGATGGGCAACGTTCACGTAGCAGCTCTTCTGCTCAACTACGGTGCAGATTCGAACTGCGAGGACCCCACTACCTTCTCCCGCCC|-------GACGCAGCGCGGGAAGGCTTCCTGGACACGCTGGTGGTGCTGCACGGGTCAGGGGCTCGGCTGGATGTGCGCGATGCCTGGGGTCGCCTGCCGCTCGACTTGGCCCAAGA
Cdkn2a	Del 0|1	0	7214	0	0	0	0	4893	4791	5851	0	2290	0	0	4470	0	0	0	4808	0	9753	0	0	34044	17699	28806	21234	CAGGTGATGATGATGGGCAACGTTCACGTAGCAGCTCTTCTGCTCAACTACGGTGCAGATTCGAACTGCGAGGACCCCACTACCTTCTCCCGCCC|-GTGCACGACGCAGCGCGGGAAGGCTTCCTGGACACGCTGGTGGTGCTGCACGGGTCAGGGGCTCGGCTGGATGTGCGCGATGCCTGGGGTCGCCTGCCGCTCGACTTGGCCCAAGA
Cdkn2a	Ins 1 C	0	2040	0	0	0	0	0	0	0	0	0	0	0	0	0	0	0	0	0	0	0	0	0	0	0	0	CAGGTGATGATGATGGGCAACGTTCACGTAGCAGCTCTTCTGCTCAACTACGGTGCAGATTCGAACTGCGAGGACCCCACTACCTTCTCCCGCCC|{C}GGTGCACGACGCAGCGCGGGAAGGCTTCCTGGACACGCTGGTGGTGCTGCACGGGTCAGGGGCTCGGCTGGATGTGCGCGATGCCTGGGGTCGCCTGCCGCTCGACTTGGCCCAAGA
Cdkn2a	Del 1|0	0	0	7232	0	3101	0	0	0	0	4005	0	0	0	4332	4172	4169	10010	14556	0	0	0	0	0	0	0	0	CAGGTGATGATGATGGGCAACGTTCACGTAGCAGCTCTTCTGCTCAACTACGGTGCAGATTCGAACTGCGAGGACCCCACTACCTTCTCCCGCC-|GGTGCACGACGCAGCGCGGGAAGGCTTCCTGGACACGCTGGTGGTGCTGCACGGGTCAGGGGCTCGGCTGGATGTGCGCGATGCCTGGGGTCGCCTGCCGCTCGACTTGGCCCAAGA
Cdkn2a	Del 17|29	0	0	0	9977	0	0	0	0	0	0	0	0	0	0	0	0	0	0	0	0	0	0	0	0	0	0	CAGGTGATGATGATGGGCAACGTTCACGTAGCAGCTCTTCTGCTCAACTACGGTGCAGATTCGAACTGCGAGGACCCC-----------------|-----------------------------CTGGACACGCTGGTGGTGCTGCACGGGTCAGGGGCTCGGCTGGATGTGCGCGATGCCTGGGGTCGCCTGCCGCTCGACTTGGCCCAAGA
Cdkn2a	Del 9|23	0	0	0	8916	0	0	0	0	0	0	0	0	0	0	0	0	0	0	0	0	0	0	0	0	0	0	CAGGTGATGATGATGGGCAACGTTCACGTAGCAGCTCTTCTGCTCAACTACGGTGCAGATTCGAACTGCGAGGACCCCACTACCTT---------|-----------------------GGCTTCCTGGACACGCTGGTGGTGCTGCACGGGTCAGGGGCTCGGCTGGATGTGCGCGATGCCTGGGGTCGCCTGCCGCTCGACTTGGCCCAAGA
Cdkn2a	Del 0|4	0	0	0	0	0	6263	0	0	0	0	0	0	0	0	0	0	0	0	0	0	0	0	6187	3029	4335	1915	CAGGTGATGATGATGGGCAACGTTCACGTAGCAGCTCTTCTGCTCAACTACGGTGCAGATTCGAACTGCGAGGACCCCACTACCTTCTCCCGCCC|G----ACGACGCAGCGCGGGAAGGCTTCCTGGACACGCTGGTGGTGCTGCACGGGTCAGGGGCTCGGCTGGATGTGCGCGATGCCTGGGGTCGCCTGCCGCTCGACTTGGCCCAAGA
Cdkn2a	Ins 1 G	0	0	0	0	0	5567	0	0	0	0	0	0	0	0	0	0	0	0	3588	0	0	0	0	0	0	0	CAGGTGATGATGATGGGCAACGTTCACGTAGCAGCTCTTCTGCTCAACTACGGTGCAGATTCGAACTGCGAGGACCCCACTACCTTCTCCCGCCC|{G}GGTGCACGACGCAGCGCGGGAAGGCTTCCTGGACACGCTGGTGGTGCTGCACGGGTCAGGGGCTCGGCTGGATGTGCGCGATGCCTGGGGTCGCCTGCCGCTCGACTTGGCCCAAGA
Cdkn2a	Del 0|10	0	0	0	0	0	0	1942	0	0	0	0	0	0	0	0	0	0	0	0	0	0	0	0	0	0	0	CAGGTGATGATGATGGGCAACGTTCACGTAGCAGCTCTTCTGCTCAACTACGGTGCAGATTCGAACTGCGAGGACCCCACTACCTTCTCCCGCCC|----------GCAGCGCGGGAAGGCTTCCTGGACACGCTGGTGGTGCTGCACGGGTCAGGGGCTCGGCTGGATGTGCGCGATGCCTGGGGTCGCCTGCCGCTCGACTTGGCCCAAGA
Cdkn2a	Del 0|16	0	0	0	0	0	0	1343	0	0	0	1240	0	0	0	0	0	0	0	0	0	808	0	0	0	0	0	CAGGTGATGATGATGGGCAACGTTCACGTAGCAGCTCTTCTGCTCAACTACGGTGCAGATTCGAACTGCGAGGACCCCACTACCTTCTCCCGCCC|G----------------CGGGAAGGCTTCCTGGACACGCTGGTGGTGCTGCACGGGTCAGGGGCTCGGCTGGATGTGCGCGATGCCTGGGGTCGCCTGCCGCTCGACTTGGCCCAAGA
Cdkn2a	Del 0|3	0	0	0	0	0	0	0	3481	0	0	0	0	0	0	0	0	0	0	0	0	2127	0	0	0	0	0	CAGGTGATGATGATGGGCAACGTTCACGTAGCAGCTCTTCTGCTCAACTACGGTGCAGATTCGAACTGCGAGGACCCCACTACCTTCTCCCGCCC|---GCACGACGCAGCGCGGGAAGGCTTCCTGGACACGCTGGTGGTGCTGCACGGGTCAGGGGCTCGGCTGGATGTGCGCGATGCCTGGGGTCGCCTGCCGCTCGACTTGGCCCAAGA
Cdkn2a	Del 4|0	0	0	0	0	0	0	0	0	4585	0	0	0	0	0	0	0	0	0	0	0	0	0	0	0	0	0	CAGGTGATGATGATGGGCAACGTTCACGTAGCAGCTCTTCTGCTCAACTACGGTGCAGATTCGAACTGCGAGGACCCCACTACCTTCTCCC----|GGTGCACGACGCAGCGCGGGAAGGCTTCCTGGACACGCTGGTGGTGCTGCACGGGTCAGGGGCTCGGCTGGATGTGCGCGATGCCTGGGGTCGCCTGCCGCTCGACTTGGCCCAAGA
Cdkn2a	Del 1|2	0	0	0	0	0	0	0	0	0	4114	0	0	0	0	0	0	0	0	0	0	0	0	0	0	0	0	CAGGTGATGATGATGGGCAACGTTCACGTAGCAGCTCTTCTGCTCAACTACGGTGCAGATTCGAACTGCGAGGACCCCACTACCTTCTCCCGCC-|--TGCACGACGCAGCGCGGGAAGGCTTCCTGGACACGCTGGTGGTGCTGCACGGGTCAGGGGCTCGGCTGGATGTGCGCGATGCCTGGGGTCGCCTGCCGCTCGACTTGGCCCAAGA
Cdkn2a	Del 2|2	0	0	0	0	0	0	0	0	0	0	0	0	9382	0	0	0	0	0	0	0	0	0	0	0	0	0	CAGGTGATGATGATGGGCAACGTTCACGTAGCAGCTCTTCTGCTCAACTACGGTGCAGATTCGAACTGCGAGGACCCCACTACCTTCTCCCGC--|--TGCACGACGCAGCGCGGGAAGGCTTCCTGGACACGCTGGTGGTGCTGCACGGGTCAGGGGCTCGGCTGGATGTGCGCGATGCCTGGGGTCGCCTGCCGCTCGACTTGGCCCAAGA
Cdkn2a	Del 0|5	0	0	0	0	0	0	0	0	0	0	0	0	9194	0	0	0	0	0	0	0	0	0	0	0	0	0	CAGGTGATGATGATGGGCAACGTTCACGTAGCAGCTCTTCTGCTCAACTACGGTGCAGATTCGAACTGCGAGGACCCCACTACCTTCTCCCGCCC|-----ACGACGCAGCGCGGGAAGGCTTCCTGGACACGCTGGTGGTGCTGCACGGGTCAGGGGCTCGGCTGGATGTGCGCGATGCCTGGGGTCGCCTGCCGCTCGACTTGGCCCAAGA
Cdkn2a	Del 1|1	0	0	0	0	0	0	0	0	0	0	0	0	0	0	4419	0	0	0	0	0	0	0	0	0	0	0	CAGGTGATGATGATGGGCAACGTTCACGTAGCAGCTCTTCTGCTCAACTACGGTGCAGATTCGAACTGCGAGGACCCCACTACCTTCTCCCGCC-|-GTGCACGACGCAGCGCGGGAAGGCTTCCTGGACACGCTGGTGGTGCTGCACGGGTCAGGGGCTCGGCTGGATGTGCGCGATGCCTGGGGTCGCCTGCCGCTCGACTTGGCCCAAGA
Cdkn2a	Del 0|17	0	0	0	0	0	0	0	0	0	0	0	0	0	0	0	7081	0	0	0	0	0	0	0	0	0	0	CAGGTGATGATGATGGGCAACGTTCACGTAGCAGCTCTTCTGCTCAACTACGGTGCAGATTCGAACTGCGAGGACCCCACTACCTTCTCCCGCCC|-----------------CGCGGGAAGGCTTCCTGGACACGCTGGTGGTGCTGCACGGGTCAGGGGCTCGGCTGGATGTGCGCGATGCCTGGGGTCGCCTGCCGCTCGACTTGGCCCAAGA
Cdkn2a	Del 4|5	0	0	0	0	0	0	0	0	0	0	0	0	0	0	0	0	10495	0	0	0	0	0	0	0	0	0	CAGGTGATGATGATGGGCAACGTTCACGTAGCAGCTCTTCTGCTCAACTACGGTGCAGATTCGAACTGCGAGGACCCCACTACCTTCTCCC----|-----ACGACGCAGCGCGGGAAGGCTTCCTGGACACGCTGGTGGTGCTGCACGGGTCAGGGGCTCGGCTGGATGTGCGCGATGCCTGGGGTCGCCTGCCGCTCGACTTGGCCCAAGA
Cdkn2a	Del 2|15	0	0	0	0	0	0	0	0	0	0	0	0	0	0	0	0	0	0	0	0	1897	0	0	0	0	0	CAGGTGATGATGATGGGCAACGTTCACGTAGCAGCTCTTCTGCTCAACTACGGTGCAGATTCGAACTGCGAGGACCCCACTACCTTCTCCCGC--|---------------GCGGGAAGGCTTCCTGGACACGCTGGTGGTGCTGCACGGGTCAGGGGCTCGGCTGGATGTGCGCGATGCCTGGGGTCGCCTGCCGCTCGACTTGGCCCAAGA
Cdkn2a	Del 2|0	0	0	0	0	0	0	0	0	0	0	0	0	0	0	0	0	0	0	0	2188	0	0	12177	5245	9435	6971	CAGGTGATGATGATGGGCAACGTTCACGTAGCAGCTCTTCTGCTCAACTACGGTGCAGATTCGAACTGCGAGGACCCCACTACCTTCTCCCGC--|GGTGCACGACGCAGCGCGGGAAGGCTTCCTGGACACGCTGGTGGTGCTGCACGGGTCAGGGGCTCGGCTGGATGTGCGCGATGCCTGGGGTCGCCTGCCGCTCGACTTGGCCCAAGA
Chd1	WT	3297	15710	13439	6755	24065	24190	14263	15214	9306	11401	15221	14725	2356	19016	16608	4656	8973	8991	20120	16593	22819	23971	38304	29404	26347	18931	AGCGACTCTGATTCTGGCTCTGACTCAGGAAGTCAATCAGAGTCTGAATCAGACACATCCCGAGAGAACAAGGTTCAAGCAAAACCACCAAAAGT|CGACGGAGCCGAGGTAAGTTAGTGCAATTGAACTGGCTTAAGACAGAAGTTAAATCTTATAACTGACTGGACAGTGTCATGGCCTGGGCATATAGCGCAGCAGTACAGCAC
Chd1	Del 2|0	6368	0	0	0	0	0	0	0	0	0	0	0	0	0	0	0	0	0	0	0	0	0	0	0	0	0	AGCGACTCTGATTCTGGCTCTGACTCAGGAAGTCAATCAGAGTCTGAATCAGACACATCCCGAGAGAACAAGGTTCAAGCAAAACCACCAA--GT|CGACGGAGCCGAGGTAAGTTAGTGCAATTGAACTGGCTTAAGACAGAAGTTAAATCTTATAACTGACTGGACAGTGTCATGGCCTGGGCATATAGCGCAGCAGTACAGCAC
Chd1	Del 2|0	6288	0	7662	0	0	0	0	0	0	0	0	0	0	0	0	0	0	4695	0	0	0	0	0	0	0	0	AGCGACTCTGATTCTGGCTCTGACTCAGGAAGTCAATCAGAGTCTGAATCAGACACATCCCGAGAGAACAAGGTTCAAGCAAAACCACCAAAA--|CGACGGAGCCGAGGTAAGTTAGTGCAATTGAACTGGCTTAAGACAGAAGTTAAATCTTATAACTGACTGGACAGTGTCATGGCCTGGGCATATAGCGCAGCAGTACAGCAC
Chd1	Del 0|4	926	0	0	8393	0	0	0	0	0	0	0	0	0	0	0	0	0	0	0	0	0	0	0	0	0	0	AGCGACTCTGATTCTGGCTCTGACTCAGGAAGTCAATCAGAGTCTGAATCAGACACATCCCGAGAGAACAAGGTTCAAGCAAAACCACCAAAAGT|----GGAGCCGAGGTAAGTTAGTGCAATTGAACTGGCTTAAGACAGAAGTTAAATCTTATAACTGACTGGACAGTGTCATGGCCTGGGCATATAGCGCAGCAGTACAGCAC
Chd1	Del 0|1	0	3714	6032	0	0	0	0	0	0	0	0	0	0	0	4495	0	0	0	0	0	0	0	483	437	1935	3043	AGCGACTCTGATTCTGGCTCTGACTCAGGAAGTCAATCAGAGTCTGAATCAGACACATCCCGAGAGAACAAGGTTCAAGCAAAACCACCAAAAGT|-GACGGAGCCGAGGTAAGTTAGTGCAATTGAACTGGCTTAAGACAGAAGTTAAATCTTATAACTGACTGGACAGTGTCATGGCCTGGGCATATAGCGCAGCAGTACAGCAC
Chd1	Ins 1 T	0	3434	0	0	0	0	0	3782	0	0	0	0	17367	0	4430	0	2181	8639	0	3011	0	0	24156	12082	14535	7045	AGCGACTCTGATTCTGGCTCTGACTCAGGAAGTCAATCAGAGTCTGAATCAGACACATCCCGAGAGAACAAGGTTCAAGCAAAACCACCAAAAGT{T}|CGACGGAGCCGAGGTAAGTTAGTGCAATTGAACTGGCTTAAGACAGAAGTTAAATCTTATAACTGACTGGACAGTGTCATGGCCTGGGCATATAGCGCAGCAGTACAGCAC
Chd1	Del 0|3	0	2484	0	0	0	0	0	0	0	0	0	0	0	0	0	0	0	0	0	0	0	0	0	0	0	0	AGCGACTCTGATTCTGGCTCTGACTCAGGAAGTCAATCAGAGTCTGAATCAGACACATCCCGAGAGAACAAGGTTCAAGCAAAACCACCAAAAGT|---CGGAGCCGAGGTAAGTTAGTGCAATTGAACTGGCTTAAGACAGAAGTTAAATCTTATAACTGACTGGACAGTGTCATGGCCTGGGCATATAGCGCAGCAGTACAGCAC
Chd1	Del 1|2	0	2465	0	0	0	0	0	0	0	0	0	0	0	0	0	0	0	0	0	0	0	0	0	0	0	0	AGCGACTCTGATTCTGGCTCTGACTCAGGAAGTCAATCAGAGTCTGAATCAGACACATCCCGAGAGAACAAGGTTCAAGCAAAACCACCAAAAG-|--ACGGAGCCGAGGTAAGTTAGTGCAATTGAACTGGCTTAAGACAGAAGTTAAATCTTATAACTGACTGGACAGTGTCATGGCCTGGGCATATAGCGCAGCAGTACAGCAC
Chd1	Del 1|0	0	0	0	8192	0	0	0	0	0	6288	0	0	0	0	0	0	0	0	0	0	4507	0	0	0	0	0	AGCGACTCTGATTCTGGCTCTGACTCAGGAAGTCAATCAGAGTCTGAATCAGACACATCCCGAGAGAACAAGGTTCAAGCAAAACCACCAAAAG-|CGACGGAGCCGAGGTAAGTTAGTGCAATTGAACTGGCTTAAGACAGAAGTTAAATCTTATAACTGACTGGACAGTGTCATGGCCTGGGCATATAGCGCAGCAGTACAGCAC
Chd1	Del 20|0	0	0	0	0	4289	0	0	0	0	0	0	0	0	0	0	0	0	0	0	0	0	0	0	0	0	0	AGCGACTCTGATTCTGGCTCTGACTCAGGAAGTCAATCAGAGTCTGAATCAGACACATCCCGAGAGAACAAGGTT--------------------|CGACGGAGCCGAGGTAAGTTAGTGCAATTGAACTGGCTTAAGACAGAAGTTAAATCTTATAACTGACTGGACAGTGTCATGGCCTGGGCATATAGCGCAGCAGTACAGCAC
Chd1	Del 7|0	0	0	0	0	3638	0	0	0	0	0	0	0	0	0	0	0	0	0	0	0	0	0	0	0	0	0	AGCGACTCTGATTCTGGCTCTGACTCAGGAAGTCAATCAGAGTCTGAATCAGACACATCCCGAGAGAACAAGGTTCAAGCAAAACCAC-------|CGACGGAGCCGAGGTAAGTTAGTGCAATTGAACTGGCTTAAGACAGAAGTTAAATCTTATAACTGACTGGACAGTGTCATGGCCTGGGCATATAGCGCAGCAGTACAGCAC
Chd1	Del 5|3	0	0	0	0	0	0	2610	0	0	0	0	0	0	0	0	0	0	0	0	0	0	0	0	0	0	0	AGCGACTCTGATTCTGGCTCTGACTCAGGAAGTCAATCAGAGTCTGAATCAGACACATCCCGAGAGAACAAGGTTCAAGCAAAACCACCA-----|--ACGGAGCCGAGGTAAGTTAGTGCAATTGAACTGGCTTAAGACAGAAGTTAAATCTTATAACTGACTGGACAGTGTCATGGCCTGGGCATATAGCGCAGCAGTACAGCAC
Chd1	Del 3|0	0	0	0	0	0	0	2678	0	0	0	0	0	0	0	0	0	0	0	0	0	0	0	0	0	0	0	AGCGACTCTGATTCTGGCTCTGACTCAGGAAGTCAATCAGAGTCTGAATCAGACACATCCCGAGAGAACAAGGTTCAAGCAAAACCACCAA---T|CGACGGAGCCGAGGTAAGTTAGTGCAATTGAACTGGCTTAAGACAGAAGTTAAATCTTATAACTGACTGGACAGTGTCATGGCCTGGGCATATAGCGCAGCAGTACAGCAC
Chd1	Del 2|3	0	0	0	0	0	0	0	3529	7485	5976	0	0	0	0	0	0	2054	0	0	0	0	0	0	0	0	0	AGCGACTCTGATTCTGGCTCTGACTCAGGAAGTCAATCAGAGTCTGAATCAGACACATCCCGAGAGAACAAGGTTCAAGCAAAACCACCAAAA--|---CGGAGCCGAGGTAAGTTAGTGCAATTGAACTGGCTTAAGACAGAAGTTAAATCTTATAACTGACTGGACAGTGTCATGGCCTGGGCATATAGCGCAGCAGTACAGCAC
Chd1	Del 63|21	0	0	0	0	0	0	0	0	2893	0	0	0	0	0	0	0	0	0	0	0	0	0	0	0	0	0	AGCGACTCTGATTCTGGCTCTGACTCAGGAAG---------------------------------------------------------------|---------------------GTGCAATTGAACTGGCTTAAGACAGAAGTTAAATCTTATAACTGACTGGACAGTGTCATGGCCTGGGCATATAGCGCAGCAGTACAGCAC
Chd1	Del 16|0	0	0	0	0	0	0	0	0	0	0	3035	0	0	0	0	0	0	0	0	0	0	0	0	0	0	0	AGCGACTCTGATTCTGGCTCTGACTCAGGAAGTCAATCAGAGTCTGAATCAGACACATCCCGAGAGAACAAGGTTCAAG----------------|CGACGGAGCCGAGGTAAGTTAGTGCAATTGAACTGGCTTAAGACAGAAGTTAAATCTTATAACTGACTGGACAGTGTCATGGCCTGGGCATATAGCGCAGCAGTACAGCAC
Chd1	Del 45|55	0	0	0	0	0	0	0	0	0	0	1046	0	0	0	0	0	0	0	0	0	0	0	0	0	0	0	AGCGACTCTGATTCTGGCTCTGACTCAGGAAGTCAATCAGAGTCTGAATC---------------------------------------------|-------------------------------------------------------CTTATAACTGACTGGACAGTGTCATGGCCTGGGCATATAGCGCAGCAGTACAGCAC
Chd1	Del 1|2	0	0	0	0	0	0	0	0	0	0	0	0	0	0	0	7679	0	0	0	0	0	0	0	0	0	0	AGCGACTCTGATTCTGGCTCTGACTCAGGAAGTCAATCAGAGTCTGAATCAGACACATCCCGAGAGAACAAGGTTCAAGCAAAACCACCAAAAG-|--ACGGAGCCGAGGTAAGTTAGTGCAATTGAACTGGCTTAAGACAGAAGTTAAATCTTATAACTGACTGGACAGTGTCATGGCCTGGGCATATAGCGCAGCAGTACAGCAC
Chd1	Del 4|0	0	0	0	0	0	0	0	0	0	0	0	7058	0	0	0	0	0	0	0	0	0	0	0	0	0	0	AGCGACTCTGATTCTGGCTCTGACTCAGGAAGTCAATCAGAGTCTGAATCAGACACATCCCGAGAGAACAAGGTTCAAGCAAAACCACCAA----|CGACGGAGCCGAGGTAAGTTAGTGCAATTGAACTGGCTTAAGACAGAAGTTAAATCTTATAACTGACTGGACAGTGTCATGGCCTGGGCATATAGCGCAGCAGTACAGCAC
Chd1	Del 13|0	0	0	0	0	0	0	0	0	0	0	0	0	0	0	0	7944	0	0	0	0	0	0	0	0	0	0	AGCGACTCTGATTCTGGCTCTGACTCAGGAAGTCAATCAGAGTCTGAATCAGACACATCCCGAGAGAACAAGGTTCAAGCA-------------T|CGACGGAGCCGAGGTAAGTTAGTGCAATTGAACTGGCTTAAGACAGAAGTTAAATCTTATAACTGACTGGACAGTGTCATGGCCTGGGCATATAGCGCAGCAGTACAGCAC
Chd1	Del 0|2	0	0	0	0	0	0	0	0	0	0	0	0	0	0	0	0	0	4722	0	0	0	0	0	0	0	0	AGCGACTCTGATTCTGGCTCTGACTCAGGAAGTCAATCAGAGTCTGAATCAGACACATCCCGAGAGAACAAGGTTCAAGCAAAACCACCAAAAGT|--ACGGAGCCGAGGTAAGTTAGTGCAATTGAACTGGCTTAAGACAGAAGTTAAATCTTATAACTGACTGGACAGTGTCATGGCCTGGGCATATAGCGCAGCAGTACAGCAC
Chd1	Del 6|0	0	0	0	0	0	0	0	0	0	0	0	0	0	0	0	0	0	4401	0	0	0	0	0	0	0	0	AGCGACTCTGATTCTGGCTCTGACTCAGGAAGTCAATCAGAGTCTGAATCAGACACATCCCGAGAGAACAAGGTTCAAGCAAAACCACC------|CGACGGAGCCGAGGTAAGTTAGTGCAATTGAACTGGCTTAAGACAGAAGTTAAATCTTATAACTGACTGGACAGTGTCATGGCCTGGGCATATAGCGCAGCAGTACAGCAC
Chd1	Del 19|29	0	0	0	0	0	0	0	0	0	0	0	0	0	0	0	0	0	0	3448	0	0	0	0	0	0	0	AGCGACTCTGATTCTGGCTCTGACTCAGGAAGTCAATCAGAGTCTGAATCAGACACATCCCGAGAGAACAAGGTTC-------------------|-----------------------------GAACTGGCTTAAGACAGAAGTTAAATCTTATAACTGACTGGACAGTGTCATGGCCTGGGCATATAGCGCAGCAGTACAGCAC
Chd1	Del 11|7	0	0	0	0	0	0	0	0	0	0	0	0	0	0	0	0	0	0	0	2154	0	0	0	0	0	0	AGCGACTCTGATTCTGGCTCTGACTCAGGAAGTCAATCAGAGTCTGAATCAGACACATCCCGAGAGAACAAGGTTCAAGCAAAA-----------|-------GCCGAGGTAAGTTAGTGCAATTGAACTGGCTTAAGACAGAAGTTAAATCTTATAACTGACTGGACAGTGTCATGGCCTGGGCATATAGCGCAGCAGTACAGCAC
Chd1	Del 0|10	0	0	0	0	0	0	0	0	0	0	0	0	0	0	0	0	0	0	0	0	0	0	5847	1904	2389	1190	AGCGACTCTGATTCTGGCTCTGACTCAGGAAGTCAATCAGAGTCTGAATCAGACACATCCCGAGAGAACAAGGTTCAAGCAAAACCACCAAAAGT|----------GAGGTAAGTTAGTGCAATTGAACTGGCTTAAGACAGAAGTTAAATCTTATAACTGACTGGACAGTGTCATGGCCTGGGCATATAGCGCAGCAGTACAGCAC
Col1a1	WT	6131	20633	16757	5703	19030	8103	14616	18319	29736	11733	27726	17325	29565	13976	15900	6835	4979	19171	19990	36318	13221	34199	87471	65292	88800	81935	AGTCCAAGACCTTCTCCCAGCATGAAGAGGATGCTAAACCCGTGGTAATAAGGCCAAGGCTGTGGCCCTGATGCGTCTGTGACTTCTCTCCACTTAGGGTCCTTCCGGTGA|ACGTGGTGCTCCCGGACCTGCTGGTCCCAAAGGTTCTCCTGGTGAAGCTGGTCGCCCCGGTGAAGCTGGTCTCCCTGGTGCCAAGGTGAGAAGATCCTCTGTCCTGTATGG
Col1a1	Del 1|0	13637	5218	0	9319	0	0	3792	11398	0	7196	0	10222	0	0	5232	13163	0	4695	0	0	0	0	672	698	5375	439	AGTCCAAGACCTTCTCCCAGCATGAAGAGGATGCTAAACCCGTGGTAATAAGGCCAAGGCTGTGGCCCTGATGCGTCTGTGACTTCTCTCCACTTAGGGTCCTTCCGGTG-|ACGTGGTGCTCCCGGACCTGCTGGTCCCAAAGGTTCTCCTGGTGAAGCTGGTCGCCCCGGTGAAGCTGGTCTCCCTGGTGCCAAGGTGAGAAGATCCTCTGTCCTGTATGG
Col1a1	Del 0|6	1458	0	0	0	0	0	0	0	0	0	0	0	0	0	0	0	0	0	0	0	0	0	0	0	0	0	AGTCCAAGACCTTCTCCCAGCATGAAGAGGATGCTAAACCCGTGGTAATAAGGCCAAGGCTGTGGCCCTGATGCGTCTGTGACTTCTCTCCACTTAGGGTCCTTCCGGTGA|------TGCTCCCGGACCTGCTGGTCCCAAAGGTTCTCCTGGTGAAGCTGGTCGCCCCGGTGAAGCTGGTCTCCCTGGTGCCAAGGTGAGAAGATCCTCTGTCCTGTATGG
Col1a1	Ins 1 A	0	2529	0	0	0	0	0	0	0	0	0	0	0	5793	0	0	7878	0	0	0	0	0	0	0	0	0	AGTCCAAGACCTTCTCCCAGCATGAAGAGGATGCTAAACCCGTGGTAATAAGGCCAAGGCTGTGGCCCTGATGCGTCTGTGACTTCTCTCCACTTAGGGTCCTTCCGGTGA{A}|ACGTGGTGCTCCCGGACCTGCTGGTCCCAAAGGTTCTCCTGGTGAAGCTGGTCGCCCCGGTGAAGCTGGTCTCCCTGGTGCCAAGGTGAGAAGATCCTCTGTCCTGTATGG
Col1a1	Del 11|7	0	0	0	10071	0	0	0	0	0	0	0	0	0	0	0	0	0	0	0	0	0	0	0	0	0	0	AGTCCAAGACCTTCTCCCAGCATGAAGAGGATGCTAAACCCGTGGTAATAAGGCCAAGGCTGTGGCCCTGATGCGTCTGTGACTTCTCTCCACTTAGGGT-----------|-------GCTCCCGGACCTGCTGGTCCCAAAGGTTCTCCTGGTGAAGCTGGTCGCCCCGGTGAAGCTGGTCTCCCTGGTGCCAAGGTGAGAAGATCCTCTGTCCTGTATGG
Col1a1	Del 0|2	0	0	0	0	2989	0	0	0	0	0	0	0	0	0	5014	0	0	0	0	0	0	0	0	0	0	0	AGTCCAAGACCTTCTCCCAGCATGAAGAGGATGCTAAACCCGTGGTAATAAGGCCAAGGCTGTGGCCCTGATGCGTCTGTGACTTCTCTCCACTTAGGGTCCTTCCGGTGA|--GTGGTGCTCCCGGACCTGCTGGTCCCAAAGGTTCTCCTGGTGAAGCTGGTCGCCCCGGTGAAGCTGGTCTCCCTGGTGCCAAGGTGAGAAGATCCTCTGTCCTGTATGG
Col1a1	Del 17|0	0	0	0	0	0	5510	0	0	0	0	0	0	0	0	0	0	0	0	0	0	0	0	0	0	0	0	AGTCCAAGACCTTCTCCCAGCATGAAGAGGATGCTAAACCCGTGGTAATAAGGCCAAGGCTGTGGCCCTGATGCGTCTGTGACTTCTCTCCAC-----------------A|ACGTGGTGCTCCCGGACCTGCTGGTCCCAAAGGTTCTCCTGGTGAAGCTGGTCGCCCCGGTGAAGCTGGTCTCCCTGGTGCCAAGGTGAGAAGATCCTCTGTCCTGTATGG
Col1a1	Del 19|0	0	0	0	0	0	5298	0	0	0	0	0	0	0	0	0	0	0	0	0	0	0	0	0	0	0	0	AGTCCAAGACCTTCTCCCAGCATGAAGAGGATGCTAAACCCGTGGTAATAAGGCCAAGGCTGTGGCCCTGATGCGTCTGTGACTTCTCTCCA-------------------|ACGTGGTGCTCCCGGACCTGCTGGTCCCAAAGGTTCTCCTGGTGAAGCTGGTCGCCCCGGTGAAGCTGGTCTCCCTGGTGCCAAGGTGAGAAGATCCTCTGTCCTGTATGG
Col1a1	Del 1|0	0	0	0	0	0	0	0	0	0	6740	0	0	0	0	0	0	0	0	0	2464	0	0	0	0	0	0	AGTCCAAGACCTTCTCCCAGCATGAAGAGGATGCTAAACCCGTGGTAATAAGGCCAAGGCTGTGGCCCTGATGCGTCTGTGACTTCTCTCCACTTAGGGTCCTTCCGGT-A|ACGTGGTGCTCCCGGACCTGCTGGTCCCAAAGGTTCTCCTGGTGAAGCTGGTCGCCCCGGTGAAGCTGGTCTCCCTGGTGCCAAGGTGAGAAGATCCTCTGTCCTGTATGG
Col1a1	Del 4|0	0	0	0	0	0	0	0	0	0	0	0	0	0	5874	0	12591	0	0	0	0	0	0	0	0	0	0	AGTCCAAGACCTTCTCCCAGCATGAAGAGGATGCTAAACCCGTGGTAATAAGGCCAAGGCTGTGGCCCTGATGCGTCTGTGACTTCTCTCCACTTAGGGTCCTTCCG----|ACGTGGTGCTCCCGGACCTGCTGGTCCCAAAGGTTCTCCTGGTGAAGCTGGTCGCCCCGGTGAAGCTGGTCTCCCTGGTGCCAAGGTGAGAAGATCCTCTGTCCTGTATGG
Col1a1	Del 0|5	0	0	0	0	0	0	0	0	0	0	0	0	0	0	0	0	8073	0	0	0	0	0	0	0	0	0	AGTCCAAGACCTTCTCCCAGCATGAAGAGGATGCTAAACCCGTGGTAATAAGGCCAAGGCTGTGGCCCTGATGCGTCTGTGACTTCTCTCCACTTAGGGTCCTTCCGGTGA|-----GTGCTCCCGGACCTGCTGGTCCCAAAGGTTCTCCTGGTGAAGCTGGTCGCCCCGGTGAAGCTGGTCTCCCTGGTGCCAAGGTGAGAAGATCCTCTGTCCTGTATGG
Col1a1	Del 37|81	0	0	0	0	0	0	0	0	0	0	0	0	0	0	0	0	0	1587	0	0	0	0	0	0	0	0	AGTCCAAGACCTTCTCCAAGACCTTCTCCCAGCATGAAGAGGATGCTAAACCCGTGGTAATAAGGCCAAGGCTGTGGCCCTGATGC------------------------------------- | ---------------------------------------------------------------------------------CAAGGTGAGAAGATCCTCTGTCCTGTATGGG
Col1a1	Del 6|0	0	0	0	0	0	0	0	0	0	0	0	0	0	0	0	0	0	0	0	0	3607	0	0	0	0	0	AGTCCAAGACCTTCTCCCAGCATGAAGAGGATGCTAAACCCGTGGTAATAAGGCCAAGGCTGTGGCCCTGATGCGTCTGTGACTTCTCTCCACTTAGGGTCCTTC------|ACGTGGTGCTCCCGGACCTGCTGGTCCCAAAGGTTCTCCTGGTGAAGCTGGTCGCCCCGGTGAAGCTGGTCTCCCTGGTGCCAAGGTGAGAAGATCCTCTGTCCTGTATGG
Col1a1	Del 1|8	0	0	0	0	0	0	0	0	0	0	0	0	0	0	0	0	0	0	0	0	3488	0	0	0	0	0	AGTCCAAGACCTTCTCCCAGCATGAAGAGGATGCTAAACCCGTGGTAATAAGGCCAAGGCTGTGGCCCTGATGCGTCTGTGACTTCTCTCCACTTAGGGTCCTTCCGGTG-|--------CTCCCGGACCTGCTGGTCCCAAAGGTTCTCCTGGTGAAGCTGGTCGCCCCGGTGAAGCTGGTCTCCCTGGTGCCAAGGTGAGAAGATCCTCTGTCCTGTATGG
Col1a1	Del 0|1	0	0	0	0	0	0	0	0	0	0	0	0	0	0	0	0	0	0	0	0	0	0	10330	5798	10751	12024	AGTCCAAGACCTTCTCCCAGCATGAAGAGGATGCTAAACCCGTGGTAATAAGGCCAAGGCTGTGGCCCTGATGCGTCTGTGACTTCTCTCCACTTAGGGTCCTTCCGGTGA|A-GTGGTGCTCCCGGACCTGCTGGTCCCAAAGGTTCTCCTGGTGAAGCTGGTCGCCCCGGTGAAGCTGGTCTCCCTGGTGCCAAGGTGAGAAGATCCTCTGTCCTGTATGG
Col1a1	Del 10|4	0	0	0	0	0	0	0	0	0	0	0	0	0	0	0	0	0	0	0	0	0	0	675	353	3915	423	AGTCCAAGACCTTCTCCCAGCATGAAGAGGATGCTAAACCCGTGGTAATAAGGCCAAGGCTGTGGCCCTGATGCGTCTGTGACTTCTCTCCACTTAGGGTC----------|----GGTGCTCCCGGACCTGCTGGTCCCAAAGGTTCTCCTGGTGAAGCTGGTCGCCCCGGTGAAGCTGGTCTCCCTGGTGCCAAGGTGAGAAGATCCTCTGTCCTGTATGG
Dlc1	WT	3354	22624	28808	9893	29512	15430	12896	19675	13756	17690	34378	9216	3141	18532	19025	5499	13134	26746	24405	34491	20995	36911	45359	56325	57451	60142	ACGAAAGCATGCTGACAGACCTCAGCGAGCACCAGGAGGTGGCCTCTGTCCGAAGCCTCAGCAGCACCAGCAGCAGCGTCCCCACCCACGCAGCCCACAGTGGAGATGCCACTACGCCCCGAAC|CAATTCCGTCATCAGCGTCTGCTCCTCCGGACACTTTGTAGGCAATGATGACTCTTTTTCCAGCCTGCCGTCTCCCAAGGAACTGTCCAGCTTCAGT
Dlc1	Del 0|3	6671	0	0	0	0	0	0	0	0	0	0	0	0	0	0	0	0	0	0	0	0	0	0	0	0	0	ACGAAAGCATGCTGACAGACCTCAGCGAGCACCAGGAGGTGGCCTCTGTCCGAAGCCTCAGCAGCACCAGCAGCAGCGTCCCCACCCACGCAGCCCACAGTGGAGATGCCACTACGCCCCGAAC|---TTCCGTCATCAGCGTCTGCTCCTCCGGACACTTTGTAGGCAATGATGACTCTTTTTCCAGCCTGCCGTCTCCCAAGGAACTGTCCAGCTTCAGT
Dlc1	Del 1|0	6554	7768	0	12945	0	16028	3040	5433	11781	18228	5992	9725	24308	0	5302	8944	3412	7329	5177	0	10624	0	39116	33097	42472	30467	ACGAAAGCATGCTGACAGACCTCAGCGAGCACCAGGAGGTGGCCTCTGTCCGAAGCCTCAGCAGCACCAGCAGCAGCGTCCCCACCCACGCAGCCCACAGTGGAGATGCCACTACGCCCCGAA-|CAATTCCGTCATCAGCGTCTGCTCCTCCGGACACTTTGTAGGCAATGATGACTCTTTTTCCAGCCTGCCGTCTCCCAAGGAACTGTCCAGCTTCAGT
Dlc1	Del 17|4	0	3095	0	0	0	0	0	0	0	0	0	0	0	0	0	0	0	0	0	0	0	0	0	0	0	0	ACGAAAGCATGCTGACAGACCTCAGCGAGCACCAGGAGGTGGCCTCTGTCCGAAGCCTCAGCAGCACCAGCAGCAGCGTCCCCACCCACGCAGCCCACAGTGGAGAT-----------------|----TCCGTCATCAGCGTCTGCTCCTCCGGACACTTTGTAGGCAATGATGACTCTTTTTCCAGCCTGCCGTCTCCCAAGGAACTGTCCAGCTTCAGT
Dlc1	Del 5|2	0	0	0	13986	0	0	0	0	0	0	0	0	0	0	0	0	0	0	0	0	0	0	0	0	0	0	ACGAAAGCATGCTGACAGACCTCAGCGAGCACCAGGAGGTGGCCTCTGTCCGAAGCCTCAGCAGCACCAGCAGCAGCGTCCCCACCCACGCAGCCCACAGTGGAGATGCCACTACGCCC-----|--ATTCCGTCATCAGCGTCTGCTCCTCCGGACACTTTGTAGGCAATGATGACTCTTTTTCCAGCCTGCCGTCTCCCAAGGAACTGTCCAGCTTCAGT
Dlc1	Del 5|0	0	0	0	0	4022	0	0	0	0	0	0	0	0	0	0	0	0	0	0	0	0	0	0	0	0	0	ACGAAAGCATGCTGACAGACCTCAGCGAGCACCAGGAGGTGGCCTCTGTCCGAAGCCTCAGCAGCACCAGCAGCAGCGTCCCCACCCACGCAGCCCACAGTGGAGATGCCACTACGCCC-----|CAATTCCGTCATCAGCGTCTGCTCCTCCGGACACTTTGTAGGCAATGATGACTCTTTTTCCAGCCTGCCGTCTCCCAAGGAACTGTCCAGCTTCAGT
Dlc1	Del 0|4	0	0	0	0	0	0	2068	4048	0	0	0	0	0	0	5182	0	2463	0	0	0	0	0	12343	8177	9195	4597	ACGAAAGCATGCTGACAGACCTCAGCGAGCACCAGGAGGTGGCCTCTGTCCGAAGCCTCAGCAGCACCAGCAGCAGCGTCCCCACCCACGCAGCCCACAGTGGAGATGCCACTACGCCCCGAAC|----TCCGTCATCAGCGTCTGCTCCTCCGGACACTTTGTAGGCAATGATGACTCTTTTTCCAGCCTGCCGTCTCCCAAGGAACTGTCCAGCTTCAGT
Dlc1	Del 19|21	0	0	0	0	0	0	0	0	9088	0	0	0	0	0	0	0	0	0	0	0	0	0	0	0	0	0	ACGAAAGCATGCTGACAGACCTCAGCGAGCACCAGGAGGTGGCCTCTGTCCGAAGCCTCAGCAGCACCAGCAGCAGCGTCCCCACCCACGCAGCCCACAGTGGAG-------------------|---------------------CTCCTCCGGACACTTTGTAGGCAATGATGACTCTTTTTCCAGCCTGCCGTCTCCCAAGGAACTGTCCAGCTTCAGT
Dlc1	Del 28|25	0	0	0	0	0	0	0	0	0	0	0	0	0	6514	0	0	0	0	0	0	0	0	0	0	0	0	ACGAAAGCATGCTGACAGACCTCAGCGAGCACCAGGAGGTGGCCTCTGTCCGAAGCCTCAGCAGCACCAGCAGCAGCGTCCCCACCCACGCAGCCC----------------------------|-------------------------TCCGGACACTTTGTAGGCAATGATGACTCTTTTTCCAGCCTGCCGTCTCCCAAGGAACTGTCCAGCTTCAGT
Dlc1	Del 3|21	0	0	0	0	0	0	0	0	0	0	0	0	0	0	0	9426	0	0	0	0	0	0	0	0	0	0	ACGAAAGCATGCTGACAGACCTCAGCGAGCACCAGGAGGTGGCCTCTGTCCGAAGCCTCAGCAGCACCAGCAGCAGCGTCCCCACCCACGCAGCCCACAGTGGAGATGCCACTACGCCCCG---|---------------------CTCCTCCGGACACTTTGTAGGCAATGATGACTCTTTTTCCAGCCTGCCGTCTCCCAAGGAACTGTCCAGCTTCAGT
Dlc1	Del 29|25	0	0	0	0	0	0	0	0	0	0	0	0	0	0	0	0	0	8072	0	0	0	0	0	0	0	0	ACGAAAGCATGCTGACAGACCTCAGCGAGCACCAGGAGGTGGCCTCTGTCCGAAGCCTCAGCAGCACCAGCAGCAGCGTCCCCACCCACGCAGCC-----------------------------|-------------------------TCCGGACACTTTGTAGGCAATGATGACTCTTTTTCCAGCCTGCCGTCTCCCAAGGAACTGTCCAGCTTCAGT
Dlc1	Del 0|9	0	0	0	0	0	0	0	0	0	0	0	9906	0	0	0	0	0	0	0	0	0	0	0	0	0	0	ACGAAAGCATGCTGACAGACCTCAGCGAGCACCAGGAGGTGGCCTCTGTCCGAAGCCTCAGCAGCACCAGCAGCAGCGTCCCCACCCACGCAGCCCACAGTGGAGATGCCACTACGCCCCGAAC|---------CATCAGCGTCTGCTCCTCCGGACACTTTGTAGGCAATGATGACTCTTTTTCCAGCCTGCCGTCTCCCAAGGAACTGTCCAGCTTCAGT
Dlc1	Del 0|6	0	0	0	0	0	0	0	0	0	0	0	0	0	0	0	0	0	0	4548	0	0	0	0	0	0	0	ACGAAAGCATGCTGACAGACCTCAGCGAGCACCAGGAGGTGGCCTCTGTCCGAAGCCTCAGCAGCACCAGCAGCAGCGTCCCCACCCACGCAGCCCACAGTGGAGATGCCACTACGCCCCGAAC|------CGTCATCAGCGTCTGCTCCTCCGGACACTTTGTAGGCAATGATGACTCTTTTTCCAGCCTGCCGTCTCCCAAGGAACTGTCCAGCTTCAGT
Dlc1	Del 30|3	0	0	0	0	0	0	0	0	0	0	0	0	0	0	0	0	0	0	0	6824	0	0	0	0	0	0	ACGAAAGCATGCTGACAGACCTCAGCGAGCACCAGGAGGTGGCCTCTGTCCGAAGCCTCAGCAGCACCAGCAGCAGCGTCCCCACCCACGCAGC------------------------------|---TTCCGTCATCAGCGTCTGCTCCTCCGGACACTTTGTAGGCAATGATGACTCTTTTTCCAGCCTGCCGTCTCCCAAGGAACTGTCCAGCTTCAGT
Fbxw7	WT	13838	46628	56652	30904	46485	38639	32287	40426	99713	47725	67432	22659	55085	30502	35823	49898	28315	54387	45913	50419	41533	59851	75011	96906	49582	49219	GTGTGAGTATGCCTTCCCTATTTCCTTTTCCATAGTTGGCACTCTATGTGCTTTCATTCCTGGAACCCAAAGACCTGCTGCAAGCGGCTCAGACTTGTCGA|TACTGGAGAATTTTGGCTGAGGATAACCTTCTCTGGAGAGAGAAATGTAAAGAAGAGGGTAAGTTCAGAATCACACACAGATGTGTTTCTACTCTGGAAACAAGTTAACAGAATAACTTGGCTGTGAGTGAGAGT
Fbxw7	Del 12|18	19700	0	0	0	0	0	0	0	0	0	0	0	0	0	0	0	0	0	0	0	0	0	0	0	0	0	GTGTGAGTATGCCTTCCCTATTTCCTTTTCCATAGTTGGCACTCTATGTGCTTTCATTCCTGGAACCCAAAGACCTGCTGCAAGCGGCT------------|------------------GAGGATAACCTTCTCTGGAGAGAGAAATGTAAAGAAGAGGGTAAGTTCAGAATCACACACAGATGTGTTTCTACTCTGGAAACAAGTTAACAGAATAACTTGGCTGTGAGTGAGAGT
Fbxw7	Del 6|0	18795	0	0	0	0	0	0	0	0	0	0	0	0	0	0	0	0	0	0	0	0	0	0	0	0	0	GTGTGAGTATGCCTTCCCTATTTCCTTTTCCATAGTTGGCACTCTATGTGCTTTCATTCCTGGAACCCAAAGACCTGCTGCAAGCGGCTCAGACT------|TACTGGAGAATTTTGGCTGAGGATAACCTTCTCTGGAGAGAGAAATGTAAAGAAGAGGGTAAGTTCAGAATCACACACAGATGTGTTTCTACTCTGGAAACAAGTTAACAGAATAACTTGGCTGTGAGTGAGAGT
Fbxw7	Del 16|8	3060	0	0	0	0	0	0	0	0	0	0	0	0	0	0	0	0	0	0	0	0	0	0	0	0	0	GTGTGAGTATGCCTTCCCTATTTCCTTTTCCATAGTTGGCACTCTATGTGCTTTCATTCCTGGAACCCAAAGACCTGCTGCAAGC----------------|--------AATTTTGGCTGAGGATAACCTTCTCTGGAGAGAGAAATGTAAAGAAGAGGGTAAGTTCAGAATCACACACAGATGTGTTTCTACTCTGGAAACAAGTTAACAGAATAACTTGGCTGTGAGTGAGAGT
Fbxw7	Del 2|0	0	4659	0	0	0	0	6810	0	0	0	0	0	0	0	0	0	15580	0	0	0	0	0	0	0	0	0	GTGTGAGTATGCCTTCCCTATTTCCTTTTCCATAGTTGGCACTCTATGTGCTTTCATTCCTGGAACCCAAAGACCTGCTGCAAGCGGCTCAGACTTGTC--|TACTGGAGAATTTTGGCTGAGGATAACCTTCTCTGGAGAGAGAAATGTAAAGAAGAGGGTAAGTTCAGAATCACACACAGATGTGTTTCTACTCTGGAAACAAGTTAACAGAATAACTTGGCTGTGAGTGAGAGT
Fbxw7	Del 0|2	0	1935	0	15942	0	0	0	0	0	0	0	0	0	0	0	0	0	0	0	0	16617	0	0	0	0	0	GTGTGAGTATGCCTTCCCTATTTCCTTTTCCATAGTTGGCACTCTATGTGCTTTCATTCCTGGAACCCAAAGACCTGCTGCAAGCGGCTCAGACTTGTCGA|--CTGGAGAATTTTGGCTGAGGATAACCTTCTCTGGAGAGAGAAATGTAAAGAAGAGGGTAAGTTCAGAATCACACACAGATGTGTTTCTACTCTGGAAACAAGTTAACAGAATAACTTGGCTGTGAGTGAGAGT
Fbxw7	Ins 3 AAA	0	1774	0	0	0	0	0	0	0	0	0	0	0	0	0	0	0	0	0	0	0	0	0	0	0	0	GTGTGAGTATGCCTTCCCTATTTCCTTTTCCATAGTTGGCACTCTATGTGCTTTCATTCCTGGAACCCAAAGACCTGCTGCAAGCGGCTCAGACTTGTCGA{AAA}|TACTGGAGAATTTTGGCTGAGGATAACCTTCTCTGGAGAGAGAAATGTAAAGAAGAGGGTAAGTTCAGAATCACACACAGATGTGTTTCTACTCTGGAAACAAGTTAACAGAATAACTTGGCTGTGAGTGAGAGT
Fbxw7	Del 0|1	0	0	0	0	0	13459	0	5893	0	0	0	21440	0	9775	0	0	0	0	7489	0	0	0	0	0	0	0	GTGTGAGTATGCCTTCCCTATTTCCTTTTCCATAGTTGGCACTCTATGTGCTTTCATTCCTGGAACCCAAAGACCTGCTGCAAGCGGCTCAGACTTGTCGA|-ACTGGAGAATTTTGGCTGAGGATAACCTTCTCTGGAGAGAGAAATGTAAAGAAGAGGGTAAGTTCAGAATCACACACAGATGTGTTTCTACTCTGGAAACAAGTTAACAGAATAACTTGGCTGTGAGTGAGAGT
Fbxw7	Del 5|0 Ins 1T	0	0	0	0	0	0	6108	0	0	0	0	0	0	0	0	0	0	0	0	0	0	0	0	0	0	0	GTGTGAGTATGCCTTCCCTATTTCCTTTTCCATAGTTGGCACTCTATGTGCTTTCATTCCTGGAACCCAAAGACCTGCTGCAAGCGGCTCAGACTT-----{T}|TACTGGAGAATTTTGGCTGAGGATAACCTTCTCTGGAGAGAGAAATGTAAAGAAGAGGGTAAGTTCAGAATCACACACAGATGTGTTTCTACTCTGGAAACAAGTTAACAGAATAACTTGGCTGTGAGTGAGAGT
Fbxw7	Del 1|0	0	0	0	0	0	0	0	0	0	15799	0	0	0	0	0	0	0	0	0	0	0	0	0	0	0	0	GTGTGAGTATGCCTTCCCTATTTCCTTTTCCATAGTTGGCACTCTATGTGCTTTCATTCCTGGAACCCAAAGACCTGCTGCAAGCGGCTCAGACTTGTCG-|TACTGGAGAATTTTGGCTGAGGATAACCTTCTCTGGAGAGAGAAATGTAAAGAAGAGGGTAAGTTCAGAATCACACACAGATGTGTTTCTACTCTGGAAACAAGTTAACAGAATAACTTGGCTGTGAGTGAGAGT
Fbxw7	Del 2|2	0	0	0	0	0	0	0	0	0	0	0	21761	0	0	0	0	0	0	0	0	0	0	0	0	0	0	GTGTGAGTATGCCTTCCCTATTTCCTTTTCCATAGTTGGCACTCTATGTGCTTTCATTCCTGGAACCCAAAGACCTGCTGCAAGCGGCTCAGACTTGTC--|--CTGGAGAATTTTGGCTGAGGATAACCTTCTCTGGAGAGAGAAATGTAAAGAAGAGGGTAAGTTCAGAATCACACACAGATGTGTTTCTACTCTGGAAACAAGTTAACAGAATAACTTGGCTGTGAGTGAGAGT
Fbxw7	Del 2|8	0	0	0	0	0	0	0	0	0	0	0	0	0	9610	0	0	0	0	0	0	0	0	0	0	0	0	GTGTGAGTATGCCTTCCCTATTTCCTTTTCCATAGTTGGCACTCTATGTGCTTTCATTCCTGGAACCCAAAGACCTGCTGCAAGCGGCTCAGACTTGTC--|--------AATTTTGGCTGAGGATAACCTTCTCTGGAGAGAGAAATGTAAAGAAGAGGGTAAGTTCAGAATCACACACAGATGTGTTTCTACTCTGGAAACAAGTTAACAGAATAACTTGGCTGTGAGTGAGAGT
Fbxw7	Del 14|0	0	0	0	0	0	0	0	0	0	0	0	0	0	0	10055	0	0	0	0	0	0	0	0	0	0	0	GTGTGAGTATGCCTTCCCTATTTCCTTTTCCATAGTTGGCACTCTATGTGCTTTCATTCCTGGAACCCAAAGACCTGCTGCAAGCGG--------------|TACTGGAGAATTTTGGCTGAGGATAACCTTCTCTGGAGAGAGAAATGTAAAGAAGAGGGTAAGTTCAGAATCACACACAGATGTGTTTCTACTCTGGAAACAAGTTAACAGAATAACTTGGCTGTGAGTGAGAGT
Fbxw7	Del 3|7	0	0	0	0	0	0	0	0	0	0	0	0	0	0	0	0	0	0	0	0	0	0	4294	4030	7829	167	GTGTGAGTATGCCTTCCCTATTTCCTTTTCCATAGTTGGCACTCTATGTGCTTTCATTCCTGGAACCCAAAGACCTGCTGCAAGCGGCTCAGACTTGT---|-------GAATTTTGGCTGAGGATAACCTTCTCTGGAGAGAGAAATGTAAAGAAGAGGGTAAGTTCAGAATCACACACAGATGTGTTTCTACTCTGGAAACAAGTTAACAGAATAACTTGGCTGTGAGTGAGAGT
Hic1	WT	161	771	331	520	802	474	141	585	902	668	530	421	163	1124	821	156	304	194	435	2225	424	1064	24972	46837	84813	93799	CTACGCTCCTTACGGGCGGCCCGGCCGGGGCTTGAGGGCTGCCACGCCCGTCATCCAGGCTTGCTACTCGTCCCCGGCCGGGCCACCGCCGCCGCCTGCCGCCGAGCCGCCGTCG|GGCCCCGATGCAGCCGTCAACACCCACTGCGCTGAGCTATATGCTTCAGGCCCGGGCCCAGCAGCCTCACTCTGCGCCCCGGAGCGTCGCTGCTCCCCGCTTTG
Hic1	Del 23|11	83	0	0	0	0	0	0	0	0	0	0	0	0	0	0	0	0	0	0	0	0	0	0	0	0	0	CTACGCTCCTTACGGGCGGCCCGGCCGGGGCTTGAGGGCTGCCACGCCCGTCATCCAGGCTTGCTACTCGTCCCCGGCCGGGCCACCGCCGC----------------------- | -----------AGCCGTCAACACCCACTGCGCTGAGCTATATGCTTCAGGCCCGGGCCCAGCAGCCTCACTCTGCGCCCCGGAGCGTCGCTGCTCCCCGCTTTG
Hic1	Del 1|0	35	530	121	651	100	0	35	304	581	842	150	276	347	543	293	227	318	173	83	511	157	414	17625	27739	50100	55894	CTACGCTCCTTACGGGCGGCCCGGCCGGGGCTTGAGGGCTGCCACGCCCGTCATCCAGGCTTGCTACTCGTCCCCGGCCGGGCCACCGCCGCCGCCTGCCGCCGAGCCGCCGTC-|GGCCCCGATGCAGCCGTCAACACCCACTGCGCTGAGCTATATGCTTCAGGCCCGGGCCCAGCAGCCTCACTCTGCGCCCCGGAGCGTCGCTGCTCCCCGCTTTG
Hic1	Del 0|19	15	0	0	0	0	0	0	0	0	0	0	0	0	0	0	0	0	0	0	0	0	0	0	0	0	0	CTACGCTCCTTACGGGCGGCCCGGCCGGGGCTTGAGGGCTGCCACGCCCGTCATCCAGGCTTGCTACTCGTCCCCGGCCGGGCCACCGCCGCCGCCTGCCGCCGAGCCGCCGTCG|G-------------------CACCCACTGCGCTGAGCTATATGCTTCAGGCCCGGGCCCAGCAGCCTCACTCTGCGCCCCGGAGCGTCGCTGCTCCCCGCTTTG
Hic1	Del 0|2	0	0	183	0	0	0	0	0	0	0	0	0	0	0	0	0	0	0	0	0	0	0	0	0	0	0	CTACGCTCCTTACGGGCGGCCCGGCCGGGGCTTGAGGGCTGCCACGCCCGTCATCCAGGCTTGCTACTCGTCCCCGGCCGGGCCACCGCCGCCGCCTGCCGCCGAGCCGCCGTCG|G--CCCGATGCAGCCGTCAACACCCACTGCGCTGAGCTATATGCTTCAGGCCCGGGCCCAGCAGCCTCACTCTGCGCCCCGGAGCGTCGCTGCTCCCCGCTTTG
Hic1	Del 1|4	0	0	0	499	0	0	0	0	0	0	0	0	0	0	0	0	0	0	0	0	0	0	0	0	0	0	CTACGCTCCTTACGGGCGGCCCGGCCGGGGCTTGAGGGCTGCCACGCCCGTCATCCAGGCTTGCTACTCGTCCCCGGCCGGGCCACCGCCGCCGCCTGCCGCCGAGCCGCCGTC- | ----CCGATGCAGCCGTCAACACCCACTGCGCTGAGCTATATGCTTCAGGCCCGGGCCCAGCAGCCTCACTCTGCGCCCCGGAGCGTCGCTGCTCCCCGCTTTG
Hic1	Del 4|0	0	0	0	0	71	0	0	0	0	0	0	0	0	0	0	0	0	0	0	0	0	0	0	0	0	0	CTACGCTCCTTACGGGCGGCCCGGCCGGGGCTTGAGGGCTGCCACGCCCGTCATCCAGGCTTGCTACTCGTCCCCGGCCGGGCCACCGCCGCCGCCTGCCGCCGAGCCGCC----|GGCCCCGATGCAGCCGTCAACACCCACTGCGCTGAGCTATATGCTTCAGGCCCGGGCCCAGCAGCCTCACTCTGCGCCCCGGAGCGTCGCTGCTCCCCGCTTTG
Hic1	Del 0|7	0	0	0	0	0	132	0	0	0	0	0	0	260	0	0	0	0	0	0	0	0	0	0	0	0	0	CTACGCTCCTTACGGGCGGCCCGGCCGGGGCTTGAGGGCTGCCACGCCCGTCATCCAGGCTTGCTACTCGTCCCCGGCCGGGCCACCGCCGCCGCCTGCCGCCGAGCCGCCGTCG|-------ATGCAGCCGTCAACACCCACTGCGCTGAGCTATATGCTTCAGGCCCGGGCCCAGCAGCCTCACTCTGCGCCCCGGAGCGTCGCTGCTCCCCGCTTTG
Hic1	Del 1|11	0	0	0	0	0	119	0	0	0	0	0	0	0	0	0	0	0	0	0	0	0	0	0	0	0	0	CTACGCTCCTTACGGGCGGCCCGGCCGGGGCTTGAGGGCTGCCACGCCCGTCATCCAGGCTTGCTACTCGTCCCCGGCCGGGCCACCGCCGCCGCCTGCCGCCGAGCCGCCGTC- | -----------AGCCGTCAACACCCACTGCGCTGAGCTATATGCTTCAGGCCCGGGCCCAGCAGCCTCACTCTGCGCCCCGGAGCGTCGCTGCTCCCCGCTTTG
Hic1	Del 0|9	0	0	0	0	0	0	0	0	529	0	0	0	0	0	0	0	0	0	0	0	0	0	0	0	0	0	CTACGCTCCTTACGGGCGGCCCGGCCGGGGCTTGAGGGCTGCCACGCCCGTCATCCAGGCTTGCTACTCGTCCCCGGCCGGGCCACCGCCGCCGCCTGCCGCCGAGCCGCCGTCG|---------GCAGCCGTCAACACCCACTGCGCTGAGCTATATGCTTCAGGCCCGGGCCCAGCAGCCTCACTCTGCGCCCCGGAGCGTCGCTGCTCCCCGCTTTG
Hic1	Del 0|2	0	0	0	0	0	0	0	0	0	0	0	0	0	0	0	204	0	0	0	0	0	0	0	0	0	0	CTACGCTCCTTACGGGCGGCCCGGCCGGGGCTTGAGGGCTGCCACGCCCGTCATCCAGGCTTGCTACTCGTCCCCGGCCGGGCCACCGCCGCCGCCTGCCGCCGAGCCGCCGTCG|--CCCCGATGCAGCCGTCAACACCCACTGCGCTGAGCTATATGCTTCAGGCCCGGGCCCAGCAGCCTCACTCTGCGCCCCGGAGCGTCGCTGCTCCCCGCTTTG
Hic1	Ins 1C	0	0	0	0	0	0	0	0	0	0	0	0	0	0	0	0	68	0	0	0	0	0	0	0	0	0	CTACGCTCCTTACGGGCGGCCCGGCCGGGGCTTGAGGGCTGCCACGCCCGTCATCCAGGCTTGCTACTCGTCCCCGGCCGGGCCACCGCCGCCGCCTGCCGCCGAGCCGCCGTCG|{C}GGCCCCGATGCAGCCGTCAACACCCACTGCGCTGAGCTATATGCTTCAGGCCCGGGCCCAGCAGCCTCACTCTGCGCCCCGGAGCGTCGCTGCTCCCCGCTTTG
Hic1	Del 2|0	0	0	0	0	0	0	0	0	0	0	0	0	0	0	0	0	0	0	0	0	0	0	2247	3893	4493	4811	CTACGCTCCTTACGGGCGGCCCGGCCGGGGCTTGAGGGCTGCCACGCCCGTCATCCAGGCTTGCTACTCGTCCCCGGCCGGGCCACCGCCGCCGCCTGCCGCCGAGCCGCCGT--|GGCCCCGATGCAGCCGTCAACACCCACTGCGCTGAGCTATATGCTTCAGGCCCGGGCCCAGCAGCCTCACTCTGCGCCCCGGAGCGTCGCTGCTCCCCGCTTTG
Hnf1a	WT	4186	12806	12352	19695	21414	24019	11218	12282	10130	23104	10799	21099	7996	15815	12404	8797	21940	10577	17776	25538	24593	21152	95280	55441	67106	73088	GCCCTACCTGATGGTTGGAGAGGGTCCCCTGGACAAGGGGGAGTCCTGCGGTGGGAGTCGAGGGGACCTGACCGAGTTGCCTAATGGCCTTGG|AGAAACGCGTGGCTCTGAAGATGACACGGATGACGATGGGGAAGACTTCGCGCCACCCATTCTGAAAGAGCTGGAGAACCTCAGCCCAGAGGAGGCAGCCCACCAGAAAGCCGTGGTGGAGTCA
Hnf1a	Del 0|13	5148	0	0	0	0	0	0	0	0	0	0	0	0	0	0	0	0	0	0	0	0	0	0	0	0	0	GCCCTACCTGATGGTTGGAGAGGGTCCCCTGGACAAGGGGGAGTCCTGCGGTGGGAGTCGAGGGGACCTGACCGAGTTGCCTAATGGCCTTGG|A-------------CTGAAGATGACACGGATGACGATGGGGAAGACTTCGCGCCACCCATTCTGAAAGAGCTGGAGAACCTCAGCCCAGAGGAGGCAGCCCACCAGAAAGCCGTGGTGGAGTCA
Hnf1a	Del 0|6	1103	0	0	0	0	0	0	0	0	0	0	0	0	0	0	0	0	0	0	0	0	0	0	0	0	0	GCCCTACCTGATGGTTGGAGAGGGTCCCCTGGACAAGGGGGAGTCCTGCGGTGGGAGTCGAGGGGACCTGACCGAGTTGCCTAATGGCCTTGG|A------CGTGGCTCTGAAGATGACACGGATGACGATGGGGAAGACTTCGCGCCACCCATTCTGAAAGAGCTGGAGAACCTCAGCCCAGAGGAGGCAGCCCACCAGAAAGCCGTGGTGGAGTCA
Hnf1a	Del 0|2	1052	6311	0	0	0	0	0	0	0	0	0	0	0	0	3629	0	0	0	0	0	0	0	0	0	0	0	GCCCTACCTGATGGTTGGAGAGGGTCCCCTGGACAAGGGGGAGTCCTGCGGTGGGAGTCGAGGGGACCTGACCGAGTTGCCTAATGGCCTTGG|--AAACGCGTGGCTCTGAAGATGACACGGATGACGATGGGGAAGACTTCGCGCCACCCATTCTGAAAGAGCTGGAGAACCTCAGCCCAGAGGAGGCAGCCCACCAGAAAGCCGTGGTGGAGTCA
Hnf1a	Ins 1 A	0	2901	0	0	0	0	0	3218	8647	0	0	0	13519	0	0	0	0	16852	0	0	0	0	0	0	0	0	GCCCTACCTGATGGTTGGAGAGGGTCCCCTGGACAAGGGGGAGTCCTGCGGTGGGAGTCGAGGGGACCTGACCGAGTTGCCTAATGGCCTTGG|{A}AGAAACGCGTGGCTCTGAAGATGACACGGATGACGATGGGGAAGACTTCGCGCCACCCATTCTGAAAGAGCTGGAGAACCTCAGCCCAGAGGAGGCAGCCCACCAGAAAGCCGTGGTGGAGTCA
Hnf1a	Del 0|3	0	2050	0	0	0	0	0	3149	0	0	0	0	0	0	0	0	0	0	0	0	0	0	0	0	0	0	GCCCTACCTGATGGTTGGAGAGGGTCCCCTGGACAAGGGGGAGTCCTGCGGTGGGAGTCGAGGGGACCTGACCGAGTTGCCTAATGGCCTTGG|---AACGCGTGGCTCTGAAGATGACACGGATGACGATGGGGAAGACTTCGCGCCACCCATTCTGAAAGAGCTGGAGAACCTCAGCCCAGAGGAGGCAGCCCACCAGAAAGCCGTGGTGGAGTCA
Hnf1a	Del 0|12	0	0	7339	0	0	0	0	0	0	0	0	0	0	0	3128	0	0	0	0	0	0	0	0	0	0	0	GCCCTACCTGATGGTTGGAGAGGGTCCCCTGGACAAGGGGGAGTCCTGCGGTGGGAGTCGAGGGGACCTGACCGAGTTGCCTAATGGCCTTGG|------------CTCTGAAGATGACACGGATGACGATGGGGAAGACTTCGCGCCACCCATTCTGAAAGAGCTGGAGAACCTCAGCCCAGAGGAGGCAGCCCACCAGAAAGCCGTGGTGGAGTCA
Hnf1a	Del 0|5	0	0	0	0	0	0	2311	0	0	0	0	0	0	0	0	0	0	0	3487	0	0	0	0	0	0	0	GCCCTACCTGATGGTTGGAGAGGGTCCCCTGGACAAGGGGGAGTCCTGCGGTGGGAGTCGAGGGGACCTGACCGAGTTGCCTAATGGCCTTGG|A-----GCGTGGCTCTGAAGATGACACGGATGACGATGGGGAAGACTTCGCGCCACCCATTCTGAAAGAGCTGGAGAACCTCAGCCCAGAGGAGGCAGCCCACCAGAAAGCCGTGGTGGAGTCA
Hnf1a	Del 5|14	0	0	0	0	0	0	2207	0	0	0	0	0	0	0	0	0	0	0	0	0	0	0	0	0	0	0	GCCCTACCTGATGGTTGGAGAGGGTCCCCTGGACAAGGGGGAGTCCTGCGGTGGGAGTCGAGGGGACCTGACCGAGTTGCCTAATGGC-----|--------------CTGAAGATGACACGGATGACGATGGGGAAGACTTCGCGCCACCCATTCTGAAAGAGCTGGAGAACCTCAGCCCAGAGGAGGCAGCCCACCAGAAAGCCGTGGTGGAGTCA
Hnf1a	Del 1|2	0	0	0	0	0	0	0	0	8469	0	0	0	0	0	0	0	0	0	0	0	0	0	0	0	0	0	GCCCTACCTGATGGTTGGAGAGGGTCCCCTGGACAAGGGGGAGTCCTGCGGTGGGAGTCGAGGGGACCTGACCGAGTTGCCTAATGGCCTTG-|--AAACGCGTGGCTCTGAAGATGACACGGATGACGATGGGGAAGACTTCGCGCCACCCATTCTGAAAGAGCTGGAGAACCTCAGCCCAGAGGAGGCAGCCCACCAGAAAGCCGTGGTGGAGTCA
Hnf1a	Del 22|69	0	0	0	0	0	0	0	0	0	0	1414	0	0	0	0	0	0	0	0	0	0	0	0	0	0	0	GCCCTACCTGATGGTTGGAGAGGGTCCCCTGGACAAGGGGGAGTCCTGCGGTGGGAGTCGAGGGGACCTGA----------------------|---------------------------------------------------------------------GCTGGAGAACCTCAGCCCAGAGGAGGCAGCCCACCAGAAAGCCGTGGTGGAGTCA
Hnf1a	Del 4|1	0	0	0	0	0	0	0	0	0	0	0	0	0	0	0	16578	0	0	0	0	0	0	0	0	0	0	GCCCTACCTGATGGTTGGAGAGGGTCCCCTGGACAAGGGGGAGTCCTGCGGTGGGAGTCGAGGGGACCTGACCGAGTTGCCTAATGGCC----|-GAAACGCGTGGCTCTGAAGATGACACGGATGACGATGGGGAAGACTTCGCGCCACCCATTCTGAAAGAGCTGGAGAACCTCAGCCCAGAGGAGGCAGCCCACCAGAAAGCCGTGGTGGAGTCA
Hnf1a	Del 0|30 (D31 I1A)	0	0	0	0	0	0	0	0	0	0	0	0	0	0	0	0	0	0	4068	0	0	0	0	0	0	0	GCCCTACCTGATGGTTGGAGAGGGTCCCCTGGACAAGGGGGAGTCCTGCGGTGGGAGTCGAGGGGACCTGACCGAGTTGCCTAATGGCCTTGG|------------------------------ATGACGATGGGGAAGACTTCGCGCCACCCATTCTGAAAGAGCTGGAGAACCTCAGCCCAGAGGAGGCAGCCCACCAGAAAGCCGTGGTGGAGTCA
Hnf1a	Ins 2 AG	0	0	0	0	0	0	0	0	0	0	0	0	0	0	0	0	0	0	0	6893	0	0	0	0	0	0	GCCCTACCTGATGGTTGGAGAGGGTCCCCTGGACAAGGGGGAGTCCTGCGGTGGGAGTCGAGGGGACCTGACCGAGTTGCCTAATGGCCTTGG|{AG}AGAAACGCGTGGCTCTGAAGATGACACGGATGACGATGGGGAAGACTTCGCGCCACCCATTCTGAAAGAGCTGGAGAACCTCAGCCCAGAGGAGGCAGCCCACCAGAAAGCCGTGGTGGAGTCA
Hnf1a	Del 0|1 (D2 I1A)	0	0	0	0	0	0	0	0	0	0	0	0	0	0	0	0	0	0	0	5189	0	0	0	0	0	0	GCCCTACCTGATGGTTGGAGAGGGTCCCCTGGACAAGGGGGAGTCCTGCGGTGGGAGTCGAGGGGACCTGACCGAGTTGCCTAATGGCCTTGG|A-AAACGCGTGGCTCTGAAGATGACACGGATGACGATGGGGAAGACTTCGCGCCACCCATTCTGAAAGAGCTGGAGAACCTCAGCCCAGAGGAGGCAGCCCACCAGAAAGCCGTGGTGGAGTCA
Hnf1a	Del 3|0	0	0	0	0	0	0	0	0	0	0	0	0	0	0	0	0	0	0	0	4866	0	0	0	0	0	0	GCCCTACCTGATGGTTGGAGAGGGTCCCCTGGACAAGGGGGAGTCCTGCGGTGGGAGTCGAGGGGACCTGACCGAGTTGCCTAATGGCCT---|AGAAACGCGTGGCTCTGAAGATGACACGGATGACGATGGGGAAGACTTCGCGCCACCCATTCTGAAAGAGCTGGAGAACCTCAGCCCAGAGGAGGCAGCCCACCAGAAAGCCGTGGTGGAGTCA
Keap1	WT	6783	27120	18813	9514	32247	21103	22704	23570	16138	32008	36883	10453	27146	23233	21355	5393	13109	32755	37446	41629	27730	31263	102256	135956	77856	118420	CTTCTACGTGCAGGCACTGCTGCGGGCCGTGCGCTGCCATGCGCTCACGCCGCGCTTCCTGCAGACGCAGCTGCAGAAGTGTGAGATCCTGCAGGCCGACG|CGCGCTGCAAGGACTACCTGGTGCAGATATTCCAGGAGCTCACGCTGCACAAGCCCACGCAGGCAGTGCCCTGCCGCGCGCCCAAAGTGGGCCGCCTCATCTACACAGCGGGCGGTTACTTCCGACAGTCGCT
Keap1	Del 2|0	13859	7949	0	13218	5090	12199	0	13851	15098	12390	8971	10791	0	0	12785	0	7805	0	0	14233	6774	0	34057	26710	36238	48626	CTTCTACGTGCAGGCACTGCTGCGGGCCGTGCGCTGCCATGCGCTCACGCCGCGCTTCCTGCAGACGCAGCTGCAGAAGTGTGAGATCCTGCAGGCCGA--|CGCGCTGCAAGGACTACCTGGTGCAGATATTCCAGGAGCTCACGCTGCACAAGCCCACGCAGGCAGTGCCCTGCCGCGCGCCCAAAGTGGGCCGCCTCATCTACACAGCGGGCGGTTACTTCCGACAGTCGCT
Keap1	Del 2|8	1761	0	0	0	0	0	0	0	0	0	0	0	0	0	0	0	0	0	0	0	0	0	0	0	0	0	CTTCTACGTGCAGGCACTGCTGCGGGCCGTGCGCTGCCATGCGCTCACGCCGCGCTTCCTGCAGACGCAGCTGCAGAAGTGTGAGATCCTGCAGGCCGA--|--------AAGGACTACCTGGTGCAGATATTCCAGGAGCTCACGCTGCACAAGCCCACGCAGGCAGTGCCCTGCCGCGCGCCCAAAGTGGGCCGCCTCATCTACACAGCGGGCGGTTACTTCCGACAGTCGCT
Keap1	Del 0|4	1721	0	0	0	5032	0	0	0	0	0	0	0	0	0	0	0	0	0	0	0	0	0	845	774	5370	27912	CTTCTACGTGCAGGCACTGCTGCGGGCCGTGCGCTGCCATGCGCTCACGCCGCGCTTCCTGCAGACGCAGCTGCAGAAGTGTGAGATCCTGCAGGCCGACG|----CTGCAAGGACTACCTGGTGCAGATATTCCAGGAGCTCACGCTGCACAAGCCCACGCAGGCAGTGCCCTGCCGCGCGCCCAAAGTGGGCCGCCTCATCTACACAGCGGGCGGTTACTTCCGACAGTCGCT
Keap1	Del 0|1	0	4535	0	0	0	0	5208	0	0	0	0	0	0	0	0	0	0	0	0	0	0	0	0	0	0	0	CTTCTACGTGCAGGCACTGCTGCGGGCCGTGCGCTGCCATGCGCTCACGCCGCGCTTCCTGCAGACGCAGCTGCAGAAGTGTGAGATCCTGCAGGCCGACG|-GCGCTGCAAGGACTACCTGGTGCAGATATTCCAGGAGCTCACGCTGCACAAGCCCACGCAGGCAGTGCCCTGCCGCGCGCCCAAAGTGGGCCGCCTCATCTACACAGCGGGCGGTTACTTCCGACAGTCGCT
Keap1	Del 0|10 (D11 I1C)	0	0	10552	0	0	0	0	0	0	0	0	0	0	0	0	0	0	0	0	0	0	0	0	0	0	0	CTTCTACGTGCAGGCACTGCTGCGGGCCGTGCGCTGCCATGCGCTCACGCCGCGCTTCCTGCAGACGCAGCTGCAGAAGTGTGAGATCCTGCAGGCCGACG|C-----------GACTACCTGGTGCAGATATTCCAGGAGCTCACGCTGCACAAGCCCACGCAGGCAGTGCCCTGCCGCGCGCCCAAAGTGGGCCGCCTCATCTACACAGCGGGCGGTTACTTCCGACAGTCGCT
Keap1	Del 0|3	0	0	10322	0	0	0	0	0	0	0	0	11242	0	0	0	0	0	0	0	0	0	0	15184	12235	14440	9193	CTTCTACGTGCAGGCACTGCTGCGGGCCGTGCGCTGCCATGCGCTCACGCCGCGCTTCCTGCAGACGCAGCTGCAGAAGTGTGAGATCCTGCAGGCCGACG|---GCTGCAAGGACTACCTGGTGCAGATATTCCAGGAGCTCACGCTGCACAAGCCCACGCAGGCAGTGCCCTGCCGCGCGCCCAAAGTGGGCCGCCTCATCTACACAGCGGGCGGTTACTTCCGACAGTCGCT
Keap1	Del 18|20	0	0	0	17064	0	0	0	0	0	0	0	0	0	0	0	0	0	0	0	0	0	0	0	0	0	0	CTTCTACGTGCAGGCACTGCTGCGGGCCGTGCGCTGCCATGCGCTCACGCCGCGCTTCCTGCAGACGCAGCTGCAGAAGTGTG------------------|--------------------GTGCAGATATTCCAGGAGCTCACGCTGCACAAGCCCACGCAGGCAGTGCCCTGCCGCGCGCCCAAAGTGGGCCGCCTCATCTACACAGCGGGCGGTTACTTCCGACAGTCGCT
Keap1	Del 0|10	0	0	0	0	0	12193	0	0	0	0	0	0	0	0	0	0	0	0	0	0	0	0	0	0	0	0	CTTCTACGTGCAGGCACTGCTGCGGGCCGTGCGCTGCCATGCGCTCACGCCGCGCTTCCTGCAGACGCAGCTGCAGAAGTGTGAGATCCTGCAGGCCGACG|----------GGACTACCTGGTGCAGATATTCCAGGAGCTCACGCTGCACAAGCCCACGCAGGCAGTGCCCTGCCGCGCGCCCAAAGTGGGCCGCCTCATCTACACAGCGGGCGGTTACTTCCGACAGTCGCT
Keap1	Del 0|17	0	0	0	0	0	0	3891	0	0	0	0	0	0	0	0	0	0	0	0	0	0	0	0	0	0	0	CTTCTACGTGCAGGCACTGCTGCGGGCCGTGCGCTGCCATGCGCTCACGCCGCGCTTCCTGCAGACGCAGCTGCAGAAGTGTGAGATCCTGCAGGCCGACG|-----------------CTGGTGCAGATATTCCAGGAGCTCACGCTGCACAAGCCCACGCAGGCAGTGCCCTGCCGCGCGCCCAAAGTGGGCCGCCTCATCTACACAGCGGGCGGTTACTTCCGACAGTCGCT
Keap1	Del 3|4	0	0	0	0	0	0	0	0	11558	0	0	0	0	0	0	0	0	0	0	0	0	0	0	0	0	0	CTTCTACGTGCAGGCACTGCTGCGGGCCGTGCGCTGCCATGCGCTCACGCCGCGCTTCCTGCAGACGCAGCTGCAGAAGTGTGAGATCCTGCAGGCCG---|----CTGCAAGGACTACCTGGTGCAGATATTCCAGGAGCTCACGCTGCACAAGCCCACGCAGGCAGTGCCCTGCCGCGCGCCCAAAGTGGGCCGCCTCATCTACACAGCGGGCGGTTACTTCCGACAGTCGCT
Keap1	Del 1|0	0	0	0	0	0	0	0	0	0	0	0	0	0	6141	0	0	0	0	0	0	0	0	0	0	0	0	CTTCTACGTGCAGGCACTGCTGCGGGCCGTGCGCTGCCATGCGCTCACGCCGCGCTTCCTGCAGACGCAGCTGCAGAAGTGTGAGATCCTGCAGGCCGAC-|CGCGCTGCAAGGACTACCTGGTGCAGATATTCCAGGAGCTCACGCTGCACAAGCCCACGCAGGCAGTGCCCTGCCGCGCGCCCAAAGTGGGCCGCCTCATCTACACAGCGGGCGGTTACTTCCGACAGTCGCT
Keap1	Del 0|12	0	0	0	0	0	0	0	0	0	0	0	0	0	0	0	9358	0	0	0	0	0	0	0	0	0	0	CTTCTACGTGCAGGCACTGCTGCGGGCCGTGCGCTGCCATGCGCTCACGCCGCGCTTCCTGCAGACGCAGCTGCAGAAGTGTGAGATCCTGCAGGCCGACG|------------ACTACCTGGTGCAGATATTCCAGGAGCTCACGCTGCACAAGCCCACGCAGGCAGTGCCCTGCCGCGCGCCCAAAGTGGGCCGCCTCATCTACACAGCGGGCGGTTACTTCCGACAGTCGCT
Keap1	Del 0|9	0	0	0	0	0	0	0	0	0	0	0	0	0	0	0	9129	0	0	0	0	0	0	0	0	0	0	CTTCTACGTGCAGGCACTGCTGCGGGCCGTGCGCTGCCATGCGCTCACGCCGCGCTTCCTGCAGACGCAGCTGCAGAAGTGTGAGATCCTGCAGGCCGACG|---------AGGACTACCTGGTGCAGATATTCCAGGAGCTCACGCTGCACAAGCCCACGCAGGCAGTGCCCTGCCGCGCGCCCAAAGTGGGCCGCCTCATCTACACAGCGGGCGGTTACTTCCGACAGTCGCT
Keap1	Del 9|10	0	0	0	0	0	0	0	0	0	0	0	0	0	0	0	0	0	0	8760	0	0	0	0	0	0	0	CTTCTACGTGCAGGCACTGCTGCGGGCCGTGCGCTGCCATGCGCTCACGCCGCGCTTCCTGCAGACGCAGCTGCAGAAGTGTGAGATCCTGC---------|----------GGACTACCTGGTGCAGATATTCCAGGAGCTCACGCTGCACAAGCCCACGCAGGCAGTGCCCTGCCGCGCGCCCAAAGTGGGCCGCCTCATCTACACAGCGGGCGGTTACTTCCGACAGTCGCT
Keap1	Del 0|6	0	0	0	0	0	0	0	0	0	0	0	0	0	0	0	0	0	0	0	0	6842	0	0	0	0	0	CTTCTACGTGCAGGCACTGCTGCGGGCCGTGCGCTGCCATGCGCTCACGCCGCGCTTCCTGCAGACGCAGCTGCAGAAGTGTGAGATCCTGCAGGCCGACG|------GCAAGGACTACCTGGTGCAGATATTCCAGGAGCTCACGCTGCACAAGCCCACGCAGGCAGTGCCCTGCCGCGCGCCCAAAGTGGGCCGCCTCATCTACACAGCGGGCGGTTACTTCCGACAGTCGCT
Keap1	Ins 1 C	0	0	0	0	0	0	0	0	0	0	0	0	0	0	0	0	0	0	0	0	0	10224	0	0	0	0	CTTCTACGTGCAGGCACTGCTGCGGGCCGTGCGCTGCCATGCGCTCACGCCGCGCTTCCTGCAGACGCAGCTGCAGAAGTGTGAGATCCTGCAGGCCGACG|{C}CGCGCTGCAAGGACTACCTGGTGCAGATATTCCAGGAGCTCACGCTGCACAAGCCCACGCAGGCAGTGCCCTGCCGCGCGCCCAAAGTGGGCCGCCTCATCTACACAGCGGGCGGTTACTTCCGACAGTCGCT
Kmt2a	WT	13198	26630	17146	10884	28474	35569	16368	11854	3934	16889	32776	45471	43063	24251	28954	8771	8264	14872	30695	50509	27853	34902	36444	55330	21998	19507	AGTTGCTGGCTCAGAAGATGCCGAGCCTCTTGCTCCTCCCATCAAACCAATTAAGCCTGTCACCAGAAACAAGGCACCTCAGGAGCCTCCGGTGAAGAAAGGGCGGCGATCA|AGGCGGTGCGGACAATGTCCTGGCTGCCAGGTGCCTGAGGACTGTGGCATTTGCACTAATTGCCTGGACAAGCCCAAGTTTGGTGGCCGCAATATA
Kmt2a	Del 18|0	29168	0	0	0	0	0	0	0	0	0	0	0	0	0	0	0	0	0	0	0	0	0	0	0	0	0	AGTTGCTGGCTCAGAAGATGCCGAGCCTCTTGCTCCTCCCATCAAACCAATTAAGCCTGTCACCAGAAACAAGGCACCTCAGGAGCCTCCGGTG------------------|AGGCGGTGCGGACAATGTCCTGGCTGCCAGGTGCCTGAGGACTGTGGCATTTGCACTAATTGCCTGGACAAGCCCAAGTTTGGTGGCCGCAATATA
Kmt2a	Del 33|65	2410	0	0	0	0	0	0	0	0	0	0	0	0	0	0	0	0	0	0	0	0	0	0	0	0	0	AGTTGCTGGCTCAGAAGATGCCGAGCCTCTTGCTCCTCCCATCAAACCAATTAAGCCTGTCACCAGAAACAAGGCACCT--------------------------------- | -----------------------------------------------------------------GGACAAGCCCAAGTTTGGTGGCCGCAATATA
Kmt2a	Ins 1 A	0	12059	0	0	0	0	0	0	0	18194	0	0	0	0	0	0	0	28235	0	0	0	10073	9777	11855	4766	5494	AGTTGCTGGCTCAGAAGATGCCGAGCCTCTTGCTCCTCCCATCAAACCAATTAAGCCTGTCACCAGAAACAAGGCACCTCAGGAGCCTCCGGTGAAGAAAGGGCGGCGATCA{A}|AGGCGGTGCGGACAATGTCCTGGCTGCCAGGTGCCTGAGGACTGTGGCATTTGCACTAATTGCCTGGACAAGCCCAAGTTTGGTGGCCGCAATATA
Kmt2a	Del 0|3	0	4806	0	0	0	0	0	3182	0	0	0	0	0	0	0	0	0	0	0	0	0	0	0	0	0	0	AGTTGCTGGCTCAGAAGATGCCGAGCCTCTTGCTCCTCCCATCAAACCAATTAAGCCTGTCACCAGAAACAAGGCACCTCAGGAGCCTCCGGTGAAGAAAGGGCGGCGATCA|---CGGTGCGGACAATGTCCTGGCTGCCAGGTGCCTGAGGACTGTGGCATTTGCACTAATTGCCTGGACAAGCCCAAGTTTGGTGGCCGCAATATA
Kmt2a	Del 17|0	0	0	9836	0	0	0	0	0	0	0	0	0	0	0	0	0	0	0	0	0	0	0	0	0	0	0	AGTTGCTGGCTCAGAAGATGCCGAGCCTCTTGCTCCTCCCATCAAACCAATTAAGCCTGTCACCAGAAACAAGGCACCTCAGGAGCCTCCGGTGA-----------------|AGGCGGTGCGGACAATGTCCTGGCTGCCAGGTGCCTGAGGACTGTGGCATTTGCACTAATTGCCTGGACAAGCCCAAGTTTGGTGGCCGCAATATA
Kmt2a	Del 7|0	0	0	9149	0	0	0	0	0	0	0	0	0	0	0	0	0	0	0	0	0	0	0	0	0	0	0	AGTTGCTGGCTCAGAAGATGCCGAGCCTCTTGCTCCTCCCATCAAACCAATTAAGCCTGTCACCAGAAACAAGGCACCTCAGGAGCCTCCGGTGAAGAAAGGGCG-------|AGGCGGTGCGGACAATGTCCTGGCTGCCAGGTGCCTGAGGACTGTGGCATTTGCACTAATTGCCTGGACAAGCCCAAGTTTGGTGGCCGCAATATA
Kmt2a	Del 1|0	0	0	0	13970	0	11875	0	0	3163	0	7106	0	0	0	0	14735	0	0	0	0	8008	0	3336	1077	2727	1952	AGTTGCTGGCTCAGAAGATGCCGAGCCTCTTGCTCCTCCCATCAAACCAATTAAGCCTGTCACCAGAAACAAGGCACCTCAGGAGCCTCCGGTGAAGAAAGGGCGGCGATC-|AGGCGGTGCGGACAATGTCCTGGCTGCCAGGTGCCTGAGGACTGTGGCATTTGCACTAATTGCCTGGACAAGCCCAAGTTTGGTGGCCGCAATATA
Kmt2a	Del 4|2	0	0	0	13052	0	0	0	0	0	0	0	0	0	0	0	0	0	0	0	0	0	0	0	0	0	0	AGTTGCTGGCTCAGAAGATGCCGAGCCTCTTGCTCCTCCCATCAAACCAATTAAGCCTGTCACCAGAAACAAGGCACCTCAGGAGCCTCCGGTGAAGAAAGGGCGGCG---- | --GCGGTGCGGACAATGTCCTGGCTGCCAGGTGCCTGAGGACTGTGGCATTTGCACTAATTGCCTGGACAAGCCCAAGTTTGGTGGCCGCAATATA
Kmt2a	Del 8|0	0	0	0	0	5258	0	0	0	0	0	0	0	0	0	0	0	0	0	0	0	0	0	0	0	0	0	AGTTGCTGGCTCAGAAGATGCCGAGCCTCTTGCTCCTCCCATCAAACCAATTAAGCCTGTCACCAGAAACAAGGCACCTCAGGAGCCTCCGGTGAAGAAAGGG--------A|AGGCGGTGCGGACAATGTCCTGGCTGCCAGGTGCCTGAGGACTGTGGCATTTGCACTAATTGCCTGGACAAGCCCAAGTTTGGTGGCCGCAATATA
Kmt2a	Del 4|0	0	0	0	0	4824	11531	3033	2273	0	0	0	0	0	0	0	15254	0	0	0	0	0	0	0	0	0	0	AGTTGCTGGCTCAGAAGATGCCGAGCCTCTTGCTCCTCCCATCAAACCAATTAAGCCTGTCACCAGAAACAAGGCACCTCAGGAGCCTCCGGTGAAGAAAGGGCGGCG----|AGGCGGTGCGGACAATGTCCTGGCTGCCAGGTGCCTGAGGACTGTGGCATTTGCACTAATTGCCTGGACAAGCCCAAGTTTGGTGGCCGCAATATA
Kmt2a	Del 2|0	0	0	0	0	0	12050	0	0	3237	0	0	0	0	0	0	0	0	0	0	0	0	0	0	0	0	0	AGTTGCTGGCTCAGAAGATGCCGAGCCTCTTGCTCCTCCCATCAAACCAATTAAGCCTGTCACCAGAAACAAGGCACCTCAGGAGCCTCCGGTGAAGAAAGGGCGGCGA--A|AGGCGGTGCGGACAATGTCCTGGCTGCCAGGTGCCTGAGGACTGTGGCATTTGCACTAATTGCCTGGACAAGCCCAAGTTTGGTGGCCGCAATATA
Kmt2a	Del 13|0	0	0	0	0	0	0	3184	0	0	0	0	0	0	0	0	0	0	0	0	0	0	0	0	0	0	0	AGTTGCTGGCTCAGAAGATGCCGAGCCTCTTGCTCCTCCCATCAAACCAATTAAGCCTGTCACCAGAAACAAGGCACCTCAGGAGCCTCCGGTGAAGAA-------------|AGGCGGTGCGGACAATGTCCTGGCTGCCAGGTGCCTGAGGACTGTGGCATTTGCACTAATTGCCTGGACAAGCCCAAGTTTGGTGGCCGCAATATA
Kmt2a	Del 4|4	0	0	0	0	0	0	0	0	0	0	6873	0	0	0	0	0	0	0	0	0	0	0	0	0	0	0	AGTTGCTGGCTCAGAAGATGCCGAGCCTCTTGCTCCTCCCATCAAACCAATTAAGCCTGTCACCAGAAACAAGGCACCTCAGGAGCCTCCGGTGAAGAAAGGGCGGCG---- | ----CGGTGCGGACAATGTCCTGGCTGCCAGGTGCCTGAGGACTGTGGCATTTGCACTAATTGCCTGGACAAGCCCAAGTTTGGTGGCCGCAATATA
Kmt2a	Del 3|0	0	0	0	0	0	0	0	0	0	0	0	0	0	8210	8772	0	0	0	6900	0	0	0	12823	12905	5751	5332	AGTTGCTGGCTCAGAAGATGCCGAGCCTCTTGCTCCTCCCATCAAACCAATTAAGCCTGTCACCAGAAACAAGGCACCTCAGGAGCCTCCGGTGAAGAAAGGGCGGCGA---|AGGCGGTGCGGACAATGTCCTGGCTGCCAGGTGCCTGAGGACTGTGGCATTTGCACTAATTGCCTGGACAAGCCCAAGTTTGGTGGCCGCAATATA
Kmt2a	Del 4|5	0	0	0	0	0	0	0	0	0	0	0	0	0	7732	0	0	0	0	0	0	0	0	0	0	0	0	AGTTGCTGGCTCAGAAGATGCCGAGCCTCTTGCTCCTCCCATCAAACCAATTAAGCCTGTCACCAGAAACAAGGCACCTCAGGAGCCTCCGGTGAAGAAAGGGCGGCG---- | -----GTGCGGACAATGTCCTGGCTGCCAGGTGCCTGAGGACTGTGGCATTTGCACTAATTGCCTGGACAAGCCCAAGTTTGGTGGCCGCAATATA
Kmt2a	Del 3|0	0	0	0	0	0	0	0	0	0	0	0	0	0	0	0	0	13334	0	0	0	0	0	0	0	0	0	AGTTGCTGGCTCAGAAGATGCCGAGCCTCTTGCTCCTCCCATCAAACCAATTAAGCCTGTCACCAGAAACAAGGCACCTCAGGAGCCTCCGGTGAAGAAAGGGCGG---TCA|AGGCGGTGCGGACAATGTCCTGGCTGCCAGGTGCCTGAGGACTGTGGCATTTGCACTAATTGCCTGGACAAGCCCAAGTTTGGTGGCCGCAATATA
Kmt2a	Del 4|0	0	0	0	0	0	0	0	0	0	0	0	0	0	0	0	0	13239	0	0	0	0	0	0	0	0	0	AGTTGCTGGCTCAGAAGATGCCGAGCCTCTTGCTCCTCCCATCAAACCAATTAAGCCTGTCACCAGAAACAAGGCACCTCAGGAGCCTCCGGTGAAGAAAGGGCGGC----A|AGGCGGTGCGGACAATGTCCTGGCTGCCAGGTGCCTGAGGACTGTGGCATTTGCACTAATTGCCTGGACAAGCCCAAGTTTGGTGGCCGCAATATA
Kmt2a	Del 24|25	0	0	0	0	0	0	0	0	0	0	0	0	0	0	0	0	0	0	7192	0	0	0	0	0	0	0	AGTTGCTGGCTCAGAAGATGCCGAGCCTCTTGCTCCTCCCATCAAACCAATTAAGCCTGTCACCAGAAACAAGGCACCTCAGGAGCCT------------------------ | -------------------------GCCAGGTGCCTGAGGACTGTGGCATTTGCACTAATTGCCTGGACAAGCCCAAGTTTGGTGGCCGCAATATA
Kmt2a	Del 22|27	0	0	0	0	0	0	0	0	0	0	0	0	0	0	0	0	0	0	3161	0	0	0	0	0	0	0	AGTTGCTGGCTCAGAAGATGCCGAGCCTCTTGCTCCTCCCATCAAACCAATTAAGCCTGTCACCAGAAACAAGGCACCTCAGGAGCCTCC---------------------- | ---------------------------CAGGTGCCTGAGGACTGTGGCATTTGCACTAATTGCCTGGACAAGCCCAAGTTTGGTGGCCGCAATATA
Kmt2a	Del 5|0	0	0	0	0	0	0	0	0	0	0	0	0	0	0	0	0	0	0	0	0	7120	0	0	0	0	0	AGTTGCTGGCTCAGAAGATGCCGAGCCTCTTGCTCCTCCCATCAAACCAATTAAGCCTGTCACCAGAAACAAGGCACCTCAGGAGCCTCCGGTGAAGAAAGGGCGGC-----|AGGCGGTGCGGACAATGTCCTGGCTGCCAGGTGCCTGAGGACTGTGGCATTTGCACTAATTGCCTGGACAAGCCCAAGTTTGGTGGCCGCAATATA
Kmt2c	WT	50988	39072	33888	35000	42597	39094	46823	59422	9113	31473	60099	21752	58191	46848	40903	13321	12539	57527	60169	22838	39946	49710	92126	141015	63691	49778	CTCATGCCAAACCAGGATCCTTTTTTGCAAGCAGCACAAAACCGAGTACCAGGTTTACCTGGCCCTTTGATAAGGCCACCTGATACATGCTCCCAGACTCCCAGGCCACCTGGGCCTGGC|CGTATAGACACATTCACTCATGCTTCCTCATCTGCTGTTCGTGATCCATATGATCAGCCTCCAGTGACTCCCAGGCCTCATTCTGAGTCTTTCG
Kmt2c	Del 0|7 (D9 I2CG)	41833	0	0	0	0	0	3521	2104	0	0	0	0	0	0	0	0	0	0	0	0	0	0	0	0	0	0	CTCATGCCAAACCAGGATCCTTTTTTGCAAGCAGCACAAAACCGAGTACCAGGTTTACCTGGCCCTTTGATAAGGCCACCTGATACATGCTCCCAGACTCCCAGGCCACCTGGGCCTGGC|CG-------ACATTCACTCATGCTTCCTCATCTGCTGTTCGTGATCCATATGATCAGCCTCCAGTGACTCCCAGGCCTCATTCTGAGTCTTTCG
Kmt2c	Del 1|0	6068	5168	0	0	0	13806	8554	0	0	0	0	20368	0	0	10314	18006	17664	0	0	0	8013	0	5740	1624	4015	4338	CTCATGCCAAACCAGGATCCTTTTTTGCAAGCAGCACAAAACCGAGTACCAGGTTTACCTGGCCCTTTGATAAGGCCACCTGATACATGCTCCCAGACTCCCAGGCCACCTGGGCCTGG-|CGTATAGACACATTCACTCATGCTTCCTCATCTGCTGTTCGTGATCCATATGATCAGCCTCCAGTGACTCCCAGGCCTCATTCTGAGTCTTTCG
Kmt2c	Del 0|2	0	5381	0	0	0	0	0	0	0	0	0	0	0	0	0	0	0	0	0	0	0	0	0	0	0	0	CTCATGCCAAACCAGGATCCTTTTTTGCAAGCAGCACAAAACCGAGTACCAGGTTTACCTGGCCCTTTGATAAGGCCACCTGATACATGCTCCCAGACTCCCAGGCCACCTGGGCCTGGC|--TATAGACACATTCACTCATGCTTCCTCATCTGCTGTTCGTGATCCATATGATCAGCCTCCAGTGACTCCCAGGCCTCATTCTGAGTCTTTCG
Kmt2c	Del 2|0	0	5332	0	0	0	0	0	0	0	0	0	0	0	0	0	0	0	0	0	0	0	0	0	0	0	0	CTCATGCCAAACCAGGATCCTTTTTTGCAAGCAGCACAAAACCGAGTACCAGGTTTACCTGGCCCTTTGATAAGGCCACCTGATACATGCTCCCAGACTCCCAGGCCACCTGGGCCTG--|CGTATAGACACATTCACTCATGCTTCCTCATCTGCTGTTCGTGATCCATATGATCAGCCTCCAGTGACTCCCAGGCCTCATTCTGAGTCTTTCG
Kmt2c	Del 0|13	0	4906	0	0	0	0	0	0	0	0	0	0	0	0	0	0	0	0	0	0	0	0	0	0	0	0	CTCATGCCAAACCAGGATCCTTTTTTGCAAGCAGCACAAAACCGAGTACCAGGTTTACCTGGCCCTTTGATAAGGCCACCTGATACATGCTCCCAGACTCCCAGGCCACCTGGGCCTGGC|-------------TCACTCATGCTTCCTCATCTGCTGTTCGTGATCCATATGATCAGCCTCCAGTGACTCCCAGGCCTCATTCTGAGTCTTTCG
Kmt2c	Del 1|2	0	0	17601	0	0	0	0	0	0	0	0	0	0	0	0	0	0	0	0	0	0	0	0	0	0	0	CTCATGCCAAACCAGGATCCTTTTTTGCAAGCAGCACAAAACCGAGTACCAGGTTTACCTGGCCCTTTGATAAGGCCACCTGATACATGCTCCCAGACTCCCAGGCCACCTGGGCCTGG-|--TATAGACACATTCACTCATGCTTCCTCATCTGCTGTTCGTGATCCATATGATCAGCCTCCAGTGACTCCCAGGCCTCATTCTGAGTCTTTCG
Kmt2c	Del 0|3	0	0	17048	0	5752	0	0	0	0	0	0	0	0	0	0	0	0	0	0	0	0	0	0	0	0	0	CTCATGCCAAACCAGGATCCTTTTTTGCAAGCAGCACAAAACCGAGTACCAGGTTTACCTGGCCCTTTGATAAGGCCACCTGATACATGCTCCCAGACTCCCAGGCCACCTGGGCCTGGC|---ATAGACACATTCACTCATGCTTCCTCATCTGCTGTTCGTGATCCATATGATCAGCCTCCAGTGACTCCCAGGCCTCATTCTGAGTCTTTCG
Kmt2c	Del 0|21	0	0	0	21024	0	0	0	0	0	0	0	0	0	0	0	0	0	0	0	0	0	0	0	0	0	0	CTCATGCCAAACCAGGATCCTTTTTTGCAAGCAGCACAAAACCGAGTACCAGGTTTACCTGGCCCTTTGATAAGGCCACCTGATACATGCTCCCAGACTCCCAGGCCACCTGGGCCTGGC|---------------------GCTTCCTCATCTGCTGTTCGTGATCCATATGATCAGCCTCCAGTGACTCCCAGGCCTCATTCTGAGTCTTTCG
Kmt2c	Del 3|5	0	0	0	0	5934	0	0	0	0	0	0	19713	0	0	0	0	0	0	0	0	0	0	0	0	0	0	CTCATGCCAAACCAGGATCCTTTTTTGCAAGCAGCACAAAACCGAGTACCAGGTTTACCTGGCCCTTTGATAAGGCCACCTGATACATGCTCCCAGACTCCCAGGCCACCTGGGCCT--- | -----AGACACATTCACTCATGCTTCCTCATCTGCTGTTCGTGATCCATATGATCAGCCTCCAGTGACTCCCAGGCCTCATTCTGAGTCTTTCG
Kmt2c	Del 3|14	0	0	0	0	0	0	0	19407	2366	0	0	0	0	0	0	0	0	0	0	0	0	0	0	0	0	0	CTCATGCCAAACCAGGATCCTTTTTTGCAAGCAGCACAAAACCGAGTACCAGGTTTACCTGGCCCTTTGATAAGGCCACCTGATACATGCTCCCAGACTCCCAGGCCACCTGGGCCT--- | --------------CACTCATGCTTCCTCATCTGCTGTTCGTGATCCATATGATCAGCCTCCAGTGACTCCCAGGCCTCATTCTGAGTCTTTCG
Kmt2c	Del 5|3	0	0	0	0	0	0	0	0	0	13087	0	0	0	0	0	0	0	0	0	0	0	0	0	0	0	0	CTCATGCCAAACCAGGATCCTTTTTTGCAAGCAGCACAAAACCGAGTACCAGGTTTACCTGGCCCTTTGATAAGGCCACCTGATACATGCTCCCAGACTCCCAGGCCACCTGGGC----- | ---ATAGACACATTCACTCATGCTTCCTCATCTGCTGTTCGTGATCCATATGATCAGCCTCCAGTGACTCCCAGGCCTCATTCTGAGTCTTTCG
Kmt2c	Del 0|14	0	0	0	0	0	0	0	0	0	0	0	0	0	0	0	18584	0	0	0	0	0	0	0	0	0	0	CTCATGCCAAACCAGGATCCTTTTTTGCAAGCAGCACAAAACCGAGTACCAGGTTTACCTGGCCCTTTGATAAGGCCACCTGATACATGCTCCCAGACTCCCAGGCCACCTGGGCCTGGC|--------------CACTCATGCTTCCTCATCTGCTGTTCGTGATCCATATGATCAGCCTCCAGTGACTCCCAGGCCTCATTCTGAGTCTTTCG
Kmt2c	Del 3|0 Ins 17bp	0	0	0	0	0	0	0	0	0	0	0	0	0	0	0	0	14634	0	0	0	0	0	0	0	0	0	CTCATGCCAAACCAGGATCCTTTTTTGCAAGCAGCACAAAACCGAGTACCAGGTTTACCTGGCCCTTTGATAAGGCCACCTGATACATGCTCCCAGACTCCCAGGCCACCTGGGCCT---{CAGTGAGCGAGCGAGCG}|CGTATAGACACATTCACTCATGCTTCCTCATCTGCTGTTCGTGATCCATATGATCAGCCTCCAGTGACTCCCAGGCCTCATTCTGAGTCTTTCG
Kmt2c	Del 29|36	0	0	0	0	0	0	0	0	0	0	0	0	0	0	0	0	0	0	0	4665	0	0	0	0	0	0	CTCATGCCAAACCAGGATCCTTTTTTGCAAGCAGCACAAAACCGAGTACCAGGTTTACCTGGCCCTTTGATAAGGCCACCTGATACATGCT----------------------------- | ------------------------------------GTTCGTGATCCATATGATCAGCCTCCAGTGACTCCCAGGCCTCATTCTGAGTCTTTCG
Kmt2c	Del 20|19	0	0	0	0	0	0	0	0	0	0	0	0	0	0	0	0	0	0	0	3847	0	0	0	0	0	0	CTCATGCCAAACCAGGATCCTTTTTTGCAAGCAGCACAAAACCGAGTACCAGGTTTACCTGGCCCTTTGATAAGGCCACCTGATACATGCTCCCAGACTC-------------------- | -------------------ATGCTTCCTCATCTGCTGTTCGTGATCCATATGATCAGCCTCCAGTGACTCCCAGGCCTCATTCTGAGTCTTTCG
Kmt2c	Del 55|47	0	0	0	0	0	0	0	0	0	0	0	0	0	0	0	0	0	0	0	3592	0	0	0	0	0	0	CTCATGCCAAACCAGGATCCTTTTTTGCAAGCAGCACAAAACCGAGTACCAGGTTTACCTGGCCC------------------------------------------------------- | -----------------------------------------------ATATGATCAGCCTCCAGTGACTCCCAGGCCTCATTCTGAGTCTTTCG
Kmt2c	Del 39|28	0	0	0	0	0	0	0	0	0	0	0	0	0	0	0	0	0	0	0	2240	0	0	0	0	0	0	CTCATGCCAAACCAGGATCCTTTTTTGCAAGCAGCACAAAACCGAGTACCAGGTTTACCTGGCCCTTTGATAAGGCCACCT--------------------------------------- | ----------------------------CATCTGCTGTTCGTGATCCATATGATCAGCCTCCAGTGACTCCCAGGCCTCATTCTGAGTCTTTCG
Kmt2c	Del 0|10	0	0	0	0	0	0	0	0	0	0	0	0	0	0	0	0	0	0	0	0	7619	0	0	0	0	0	CTCATGCCAAACCAGGATCCTTTTTTGCAAGCAGCACAAAACCGAGTACCAGGTTTACCTGGCCCTTTGATAAGGCCACCTGATACATGCTCCCAGACTCCCAGGCCACCTGGGCCTGGC|----------CATTCACTCATGCTTCCTCATCTGCTGTTCGTGATCCATATGATCAGCCTCCAGTGACTCCCAGGCCTCATTCTGAGTCTTTCG
Kmt2c	Del 0|6	0	0	0	0	0	0	0	0	0	0	0	0	0	0	0	0	0	0	0	0	0	0	5303	1079	2002	2680	CTCATGCCAAACCAGGATCCTTTTTTGCAAGCAGCACAAAACCGAGTACCAGGTTTACCTGGCCCTTTGATAAGGCCACCTGATACATGCTCCCAGACTCCCAGGCCACCTGGGCCTGGC|C------ACACATTCACTCATGCTTCCTCATCTGCTGTTCGTGATCCATATGATCAGCCTCCAGTGACTCCCAGGCCTCATTCTGAGTCTTTCG
Lkb1	WT	5331	28779	30631	13338	42350	18704	23066	26749	11709	20547	28698	12297	4330	20316	22697	7780	8514	19156	33288	31647	29337	28166	67506	39490	47938	49980	ATCGACTCCACCGAGGTAATCTACCAGCCGCGCCGCAAACGCGCCAAGCTCATCGGCAAGTACCTGATGGGGGACCTGCTCGGGGAGGGCTCGTACG|GCAAGGTGAAGGAGGTGCTGGACTCCGAGACCTTATGCCGCAGGGCGGTCAAGATCCTCAAGAAGAAAAAGCTGCGCAGGATCCCCAATGGAGAGGCCAACGTCAAGAAGTA
Lkb1	Del 63|0	15296	0	0	0	0	0	2096	0	0	0	0	0	0	0	0	0	0	0	0	0	0	0	0	0	0	0	ATCGACTCCACCGAGGTAATCTACCAGCCGCGCCGCAAACGCGCC---------------------------------------------------------------|GCAAGGTGAAGGAGGTGCTGGACTCCGAGACCTTATGCCGCAGGGCGGTCAAGATCCTCAAGAAGAAAAAGCTGCGCAGGATCCCCAATGGAGAGGCCAACGTCAAGAAGTA
Lkb1	Del 1|0	6607	9158	0	0	0	0	0	0	0	0	0	0	0	0	0	0	0	9165	0	0	0	0	0	0	0	0	ATCGACTCCACCGAGGTAATCTACCAGCCGCGCCGCAAACGCGCCAAGCTCATCGGCAAGTACCTGATGGGGGACCTGCTCGGGGAGGGCTCGTA-G|GCAAGGTGAAGGAGGTGCTGGACTCCGAGACCTTATGCCGCAGGGCGGTCAAGATCCTCAAGAAGAAAAAGCTGCGCAGGATCCCCAATGGAGAGGCCAACGTCAAGAAGTA
Lkb1	Del 4|0	0	6105	14981	15573	5041	0	0	7522	20435	26005	0	0	15873	0	0	24465	0	0	6364	4397	6771	0	4343	1583	6376	9844	ATCGACTCCACCGAGGTAATCTACCAGCCGCGCCGCAAACGCGCCAAGCTCATCGGCAAGTACCTGATGGGGGACCTGCTCGGGGAGGGCTCG----|GCAAGGTGAAGGAGGTGCTGGACTCCGAGACCTTATGCCGCAGGGCGGTCAAGATCCTCAAGAAGAAAAAGCTGCGCAGGATCCCCAATGGAGAGGCCAACGTCAAGAAGTA
Lkb1	Del 2|0	0	4624	0	16513	0	0	0	0	0	0	0	0	0	0	5638	0	0	0	0	0	0	0	0	0	0	0	ATCGACTCCACCGAGGTAATCTACCAGCCGCGCCGCAAACGCGCCAAGCTCATCGGCAAGTACCTGATGGGGGACCTGCTCGGGGAGGGCTCGT--G|GCAAGGTGAAGGAGGTGCTGGACTCCGAGACCTTATGCCGCAGGGCGGTCAAGATCCTCAAGAAGAAAAAGCTGCGCAGGATCCCCAATGGAGAGGCCAACGTCAAGAAGTA
Lkb1	Del 15|0	0	0	18278	0	0	0	0	0	0	0	0	0	0	0	0	0	0	0	0	0	0	0	0	0	0	0	ATCGACTCCACCGAGGTAATCTACCAGCCGCGCCGCAAACGCGCCAAGCTCATCGGCAAGTACCTGATGGGGGACCTGCTCG---------------|GCAAGGTGAAGGAGGTGCTGGACTCCGAGACCTTATGCCGCAGGGCGGTCAAGATCCTCAAGAAGAAAAAGCTGCGCAGGATCCCCAATGGAGAGGCCAACGTCAAGAAGTA
Lkb1	Del 19|0	0	0	0	0	0	11869	0	0	0	0	0	0	0	0	0	0	0	0	0	0	0	0	0	0	0	0	ATCGACTCCACCGAGGTAATCTACCAGCCGCGCCGCAAACGCGCCAAGCTCATCGGCAAGTACCTGATGGGGGACC--------------------G|GCAAGGTGAAGGAGGTGCTGGACTCCGAGACCTTATGCCGCAGGGCGGTCAAGATCCTCAAGAAGAAAAAGCTGCGCAGGATCCCCAATGGAGAGGCCAACGTCAAGAAGTA
Lkb1	Del 6|0	0	0	0	0	0	8833	0	0	0	0	0	0	0	0	0	0	0	0	0	0	0	0	0	0	0	0	ATCGACTCCACCGAGGTAATCTACCAGCCGCGCCGCAAACGCGCCAAGCTCATCGGCAAGTACCTGATGGGGGACCTGCTCGGGGAGGGC------G|GCAAGGTGAAGGAGGTGCTGGACTCCGAGACCTTATGCCGCAGGGCGGTCAAGATCCTCAAGAAGAAAAAGCTGCGCAGGATCCCCAATGGAGAGGCCAACGTCAAGAAGTA
Lkb1	Del 19|8	0	0	0	0	0	0	4839	0	0	0	0	0	0	0	0	0	0	0	0	0	0	0	0	0	0	0	ATCGACTCCACCGAGGTAATCTACCAGCCGCGCCGCAAACGCGCCAAGCTCATCGGCAAGTACCTGATGGGGGACCTG------------------- | --------AAGGAGGTGCTGGACTCCGAGACCTTATGCCGCAGGGCGGTCAAGATCCTCAAGAAGAAAAAGCTGCGCAGGATCCCCAATGGAGAGGCCAACGTCAAGAAGTA
Lkb1	Del 11|9	0	0	0	0	0	0	4270	0	0	0	0	0	0	0	0	0	0	0	0	0	0	0	0	0	0	0	ATCGACTCCACCGAGGTAATCTACCAGCCGCGCCGCAAACGCGCCAAGCTCATCGGCAAGTACCTGATGGGGGACCTGCTCGGGGA----------- | ---------AGGAGGTGCTGGACTCCGAGACCTTATGCCGCAGGGCGGTCAAGATCCTCAAGAAGAAAAAGCTGCGCAGGATCCCCAATGGAGAGGCCAACGTCAAGAAGTA
Lkb1	Del 3|0	0	0	0	0	0	0	0	6266	0	0	0	0	0	0	0	0	0	0	0	0	0	0	0	0	0	0	ATCGACTCCACCGAGGTAATCTACCAGCCGCGCCGCAAACGCGCCAAGCTCATCGGCAAGTACCTGATGGGGGACCTGCTCGGGGAGGGCTCGT---|GCAAGGTGAAGGAGGTGCTGGACTCCGAGACCTTATGCCGCAGGGCGGTCAAGATCCTCAAGAAGAAAAAGCTGCGCAGGATCCCCAATGGAGAGGCCAACGTCAAGAAGTA
Lkb1	Del 10|12	0	0	0	0	0	0	0	0	0	0	6259	0	0	0	0	0	0	0	0	0	0	0	0	0	0	0	ATCGACTCCACCGAGGTAATCTACCAGCCGCGCCGCAAACGCGCCAAGCTCATCGGCAAGTACCTGATGGGGGACCTGCTCGGGGAG---------- | ------------AGGTGCTGGACTCCGAGACCTTATGCCGCAGGGCGGTCAAGATCCTCAAGAAGAAAAAGCTGCGCAGGATCCCCAATGGAGAGGCCAACGTCAAGAAGTA
Lkb1	Del 10|0	0	0	0	0	0	0	0	0	0	0	5918	0	0	0	0	0	0	0	0	0	0	0	0	0	0	0	ATCGACTCCACCGAGGTAATCTACCAGCCGCGCCGCAAACGCGCCAAGCTCATCGGCAAGTACCTGATGGGGGACCTGCTCGGGGAG----------|GCAAGGTGAAGGAGGTGCTGGACTCCGAGACCTTATGCCGCAGGGCGGTCAAGATCCTCAAGAAGAAAAAGCTGCGCAGGATCCCCAATGGAGAGGCCAACGTCAAGAAGTA
Lkb1	Del 0|8	0	0	0	0	0	0	0	0	0	0	0	12782	0	0	0	0	0	9233	0	0	0	0	0	0	0	0	ATCGACTCCACCGAGGTAATCTACCAGCCGCGCCGCAAACGCGCCAAGCTCATCGGCAAGTACCTGATGGGGGACCTGCTCGGGGAGGGCTCGTACG|--------AAGGAGGTGCTGGACTCCGAGACCTTATGCCGCAGGGCGGTCAAGATCCTCAAGAAGAAAAAGCTGCGCAGGATCCCCAATGGAGAGGCCAACGTCAAGAAGTA
Lkb1	Del 8|0	0	0	0	0	0	0	0	0	0	0	0	13080	0	0	0	0	0	0	0	0	0	0	0	0	0	0	ATCGACTCCACCGAGGTAATCTACCAGCCGCGCCGCAAACGCGCCAAGCTCATCGGCAAGTACCTGATGGGGGACCTGCTCGGGGAGGG--------|GCAAGGTGAAGGAGGTGCTGGACTCCGAGACCTTATGCCGCAGGGCGGTCAAGATCCTCAAGAAGAAAAAGCTGCGCAGGATCCCCAATGGAGAGGCCAACGTCAAGAAGTA
Lkb1	Del 1|0	0	0	0	0	0	0	0	0	0	0	0	0	15306	7004	0	0	0	0	0	7352	0	0	0	0	0	0	ATCGACTCCACCGAGGTAATCTACCAGCCGCGCCGCAAACGCGCCAAGCTCATCGGCAAGTACCTGATGGGGGACCTGCTCGGGGAGGGCTCGTAC-|GCAAGGTGAAGGAGGTGCTGGACTCCGAGACCTTATGCCGCAGGGCGGTCAAGATCCTCAAGAAGAAAAAGCTGCGCAGGATCCCCAATGGAGAGGCCAACGTCAAGAAGTA
Lkb1	Del 21|2	0	0	0	0	0	0	0	0	0	0	0	0	0	9203	0	0	0	0	0	0	0	0	0	0	0	0	ATCGACTCCACCGAGGTAATCTACCAGCCGCGCCGCAAACGCGCCAAGCTCATCGGCAAGTACCTGATGGGGGACC--------------------- | --AAGGTGAAGGAGGTGCTGGACTCCGAGACCTTATGCCGCAGGGCGGTCAAGATCCTCAAGAAGAAAAAGCTGCGCAGGATCCCCAATGGAGAGGCCAACGTCAAGAAGTA
Lkb1	Del 9|0	0	0	0	0	0	0	0	0	0	0	0	0	0	0	4425	0	0	0	0	8050	0	0	3260	69	3875	271	ATCGACTCCACCGAGGTAATCTACCAGCCGCGCCGCAAACGCGCCAAGCTCATCGGCAAGTACCTGATGGGGGACCTGCTCGGGGAGG---------|GCAAGGTGAAGGAGGTGCTGGACTCCGAGACCTTATGCCGCAGGGCGGTCAAGATCCTCAAGAAGAAAAAGCTGCGCAGGATCCCCAATGGAGAGGCCAACGTCAAGAAGTA
Lkb1	Del 13|0	0	0	0	0	0	0	0	0	0	0	0	0	0	0	0	0	13435	0	0	0	0	0	0	0	0	0	ATCGACTCCACCGAGGTAATCTACCAGCCGCGCCGCAAACGCGCCAAGCTCATCGGCAAGTACCTGATGGGGGACCTGCTCGGG-------------|GCAAGGTGAAGGAGGTGCTGGACTCCGAGACCTTATGCCGCAGGGCGGTCAAGATCCTCAAGAAGAAAAAGCTGCGCAGGATCCCCAATGGAGAGGCCAACGTCAAGAAGTA
Lkb1	Del 2|0	0	0	0	0	0	0	0	0	0	0	0	0	0	0	0	0	12085	0	0	0	0	0	0	0	0	0	ATCGACTCCACCGAGGTAATCTACCAGCCGCGCCGCAAACGCGCCAAGCTCATCGGCAAGTACCTGATGGGGGACCTGCTCGGGGAGGGCTCG--CG|GCAAGGTGAAGGAGGTGCTGGACTCCGAGACCTTATGCCGCAGGGCGGTCAAGATCCTCAAGAAGAAAAAGCTGCGCAGGATCCCCAATGGAGAGGCCAACGTCAAGAAGTA
Lkb1	Del 0|2	0	0	0	0	0	0	0	0	0	0	0	0	0	0	0	0	0	9495	0	0	0	0	0	0	0	0	ATCGACTCCACCGAGGTAATCTACCAGCCGCGCCGCAAACGCGCCAAGCTCATCGGCAAGTACCTGATGGGGGACCTGCTCGGGGAGGGCTCGTACG|--AAGGTGAAGGAGGTGCTGGACTCCGAGACCTTATGCCGCAGGGCGGTCAAGATCCTCAAGAAGAAAAAGCTGCGCAGGATCCCCAATGGAGAGGCCAACGTCAAGAAGTA
Lkb1	Del 4|5	0	0	0	0	0	0	0	0	0	0	0	0	0	0	0	0	0	0	6159	0	0	0	0	0	0	0	ATCGACTCCACCGAGGTAATCTACCAGCCGCGCCGCAAACGCGCCAAGCTCATCGGCAAGTACCTGATGGGGGACCTGCTCGGGGAGGGCTCG---- | -----GTGAAGGAGGTGCTGGACTCCGAGACCTTATGCCGCAGGGCGGTCAAGATCCTCAAGAAGAAAAAGCTGCGCAGGATCCCCAATGGAGAGGCCAACGTCAAGAAGTA
Lkb1	Del 0|5	0	0	0	0	0	0	0	0	0	0	0	0	0	0	0	0	0	0	0	3292	0	0	0	0	0	0	ATCGACTCCACCGAGGTAATCTACCAGCCGCGCCGCAAACGCGCCAAGCTCATCGGCAAGTACCTGATGGGGGACCTGCTCGGGGAGGGCTCGTACG|-----GTGAAGGAGGTGCTGGACTCCGAGACCTTATGCCGCAGGGCGGTCAAGATCCTCAAGAAGAAAAAGCTGCGCAGGATCCCCAATGGAGAGGCCAACGTCAAGAAGTA
Lkb1	Del 3|0	0	0	0	0	0	0	0	0	0	0	0	0	0	0	0	0	0	0	0	0	6997	0	0	0	0	0	ATCGACTCCACCGAGGTAATCTACCAGCCGCGCCGCAAACGCGCCAAGCTCATCGGCAAGTACCTGATGGGGGACCTGCTCGGGGAGGGCTCG---G|GCAAGGTGAAGGAGGTGCTGGACTCCGAGACCTTATGCCGCAGGGCGGTCAAGATCCTCAAGAAGAAAAAGCTGCGCAGGATCCCCAATGGAGAGGCCAACGTCAAGAAGTA
Lkb1	Del 3|0	0	0	0	0	0	0	0	0	0	0	0	0	0	0	0	0	0	0	0	0	0	7879	0	0	0	0	ATCGACTCCACCGAGGTAATCTACCAGCCGCGCCGCAAACGCGCCAAGCTCATCGGCAAGTACCTGATGGGGGACCTGCTCGGGGAGGGCTC---CG|GCAAGGTGAAGGAGGTGCTGGACTCCGAGACCTTATGCCGCAGGGCGGTCAAGATCCTCAAGAAGAAAAAGCTGCGCAGGATCCCCAATGGAGAGGCCAACGTCAAGAAGTA
Lkb1	Ins 1 G	0	0	0	0	0	0	0	0	0	0	0	0	0	0	0	0	0	0	0	0	0	0	4899	2108	7641	11861	ATCGACTCCACCGAGGTAATCTACCAGCCGCGCCGCAAACGCGCCAAGCTCATCGGCAAGTACCTGATGGGGGACCTGCTCGGGGAGGGCTCGTACG{G}|GCAAGGTGAAGGAGGTGCTGGACTCCGAGACCTTATGCCGCAGGGCGGTCAAGATCCTCAAGAAGAAAAAGCTGCGCAGGATCCCCAATGGAGAGGCCAACGTCAAGAAGTA
Lkb1	Del 2|0	0	0	0	0	0	0	0	0	0	0	0	0	0	0	0	0	0	0	0	0	0	0	4349	1541	7162	11053	ATCGACTCCACCGAGGTAATCTACCAGCCGCGCCGCAAACGCGCCAAGCTCATCGGCAAGTACCTGATGGGGGACCTGCTCGGGGAGGGCTCGTA--|GCAAGGTGAAGGAGGTGCTGGACTCCGAGACCTTATGCCGCAGGGCGGTCAAGATCCTCAAGAAGAAAAAGCTGCGCAGGATCCCCAATGGAGAGGCCAACGTCAAGAAGTA
Lkb1	Del 0|3	0	0	0	0	0	0	0	0	0	0	0	0	0	0	0	0	0	0	0	0	0	0	3163	66	3836	289	ATCGACTCCACCGAGGTAATCTACCAGCCGCGCCGCAAACGCGCCAAGCTCATCGGCAAGTACCTGATGGGGGACCTGCTCGGGGAGGGCTCGTACG|---AGGTGAAGGAGGTGCTGGACTCCGAGACCTTATGCCGCAGGGCGGTCAAGATCCTCAAGAAGAAAAAGCTGCGCAGGATCCCCAATGGAGAGGCCAACGTCAAGAAGTA
Mlh1	WT	9646	24388	20281	8829	22917	17430	26999	28061	20422	26811	48788	49920	41261	23420	25466	7635	30871	16083	41203	31611	28725	41768	52950	101429	47212	71195	ATGTGCTAAAACCTGGCCTTTTTTACTCTTTTCTCTCTTGAAACAGACCTTGCTTCCAGGACTTGCTGGGCCTTCTGGGGAGGCAGCTAGACCCACGA|CAGGGGTGGCTTCCTCATCCACTAGTGGAAGTGGCGACAAGGTCTACGCTTACCAGATGGTCCGTACGGACTCCCGGGAGCAGAAGCTTGACGCCTTTCTGCAGCCTGTAAG
Mlh1	Del 3|0	24961	6064	0	0	0	0	0	0	0	13680	0	0	0	7488	7071	0	765	0	0	0	7170	0	11823	4033	10052	437	ATGTGCTAAAACCTGGCCTTTTTTACTCTTTTCTCTCTTGAAACAGACCTTGCTTCCAGGACTTGCTGGGCCTTCTGGGGAGGCAGCTAGACCCA---|CAGGGGTGGCTTCCTCATCCACTAGTGGAAGTGGCGACAAGGTCTACGCTTACCAGATGGTCCGTACGGACTCCCGGGAGCAGAAGCTTGACGCCTTTCTGCAGCCTGTAAG
Mlh1	Del 5|0	19023	0	0	0	3326	0	0	0	32483	13491	0	0	0	0	0	0	679	0	0	2985	0	0	0	0	0	0	ATGTGCTAAAACCTGGCCTTTTTTACTCTTTTCTCTCTTGAAACAGACCTTGCTTCCAGGACTTGCTGGGCCTTCTGGGGAGGCAGCTAGACC-----|CAGGGGTGGCTTCCTCATCCACTAGTGGAAGTGGCGACAAGGTCTACGCTTACCAGATGGTCCGTACGGACTCCCGGGAGCAGAAGCTTGACGCCTTTCTGCAGCCTGTAAG
Mlh1	Del 2|0	0	4496	0	11402	0	0	0	7743	0	0	0	0	0	0	0	0	0	0	0	0	0	0	0	0	0	0	ATGTGCTAAAACCTGGCCTTTTTTACTCTTTTCTCTCTTGAAACAGACCTTGCTTCCAGGACTTGCTGGGCCTTCTGGGGAGGCAGCTAGACCCAC--|CAGGGGTGGCTTCCTCATCCACTAGTGGAAGTGGCGACAAGGTCTACGCTTACCAGATGGTCCGTACGGACTCCCGGGAGCAGAAGCTTGACGCCTTTCTGCAGCCTGTAAG
Mlh1	Del 0|1	0	4159	0	0	0	0	0	0	0	0	0	0	0	0	0	0	0	0	0	0	0	0	0	0	0	0	ATGTGCTAAAACCTGGCCTTTTTTACTCTTTTCTCTCTTGAAACAGACCTTGCTTCCAGGACTTGCTGGGCCTTCTGGGGAGGCAGCTAGACCCACGA|-AGGGGTGGCTTCCTCATCCACTAGTGGAAGTGGCGACAAGGTCTACGCTTACCAGATGGTCCGTACGGACTCCCGGGAGCAGAAGCTTGACGCCTTTCTGCAGCCTGTAAG
Mlh1	Del 10|2	0	0	10881	0	0	0	0	0	0	0	0	0	0	0	0	0	0	0	0	0	0	0	0	0	0	0	ATGTGCTAAAACCTGGCCTTTTTTACTCTTTTCTCTCTTGAAACAGACCTTGCTTCCAGGACTTGCTGGGCCTTCTGGGGAGGCAGCT----------|--GGGGTGGCTTCCTCATCCACTAGTGGAAGTGGCGACAAGGTCTACGCTTACCAGATGGTCCGTACGGACTCCCGGGAGCAGAAGCTTGACGCCTTTCTGCAGCCTGTAAG
Mlh1	Del 30|9	0	0	0	14908	0	0	0	0	0	0	0	0	0	0	0	0	186	0	0	0	0	0	0	0	0	0	ATGTGCTAAAACCTGGCCTTTTTTACTCTTTTCTCTCTTGAAACAGACCTTGCTTCCAGGACTTGCTG------------------------------|---------CTTCCTCATCCACTAGTGGAAGTGGCGACAAGGTCTACGCTTACCAGATGGTCCGTACGGACTCCCGGGAGCAGAAGCTTGACGCCTTTCTGCAGCCTGTAAG
Mlh1	Del 14|10	0	0	0	0	4149	0	0	0	0	0	0	0	0	0	0	0	0	0	0	0	0	0	0	0	0	0	ATGTGCTAAAACCTGGCCTTTTTTACTCTTTTCTCTCTTGAAACAGACCTTGCTTCCAGGACTTGCTGGGCCTTCTGGGGAGGC--------------|----------TTCCTCATCCACTAGTGGAAGTGGCGACAAGGTCTACGCTTACCAGATGGTCCGTACGGACTCCCGGGAGCAGAAGCTTGACGCCTTTCTGCAGCCTGTAAG
Mlh1	Del 1|0	0	0	0	0	0	9359	0	0	0	0	0	0	0	0	0	0	0	0	0	0	0	0	0	0	0	0	ATGTGCTAAAACCTGGCCTTTTTTACTCTTTTCTCTCTTGAAACAGACCTTGCTTCCAGGACTTGCTGGGCCTTCTGGGGAGGCAGCTAGACCCACG-|CAGGGGTGGCTTCCTCATCCACTAGTGGAAGTGGCGACAAGGTCTACGCTTACCAGATGGTCCGTACGGACTCCCGGGAGCAGAAGCTTGACGCCTTTCTGCAGCCTGTAAG
Mlh1	Del 0|2	0	0	0	0	0	9350	0	7051	0	0	0	0	0	0	0	0	0	0	0	0	0	0	0	0	0	0	ATGTGCTAAAACCTGGCCTTTTTTACTCTTTTCTCTCTTGAAACAGACCTTGCTTCCAGGACTTGCTGGGCCTTCTGGGGAGGCAGCTAGACCCACGA|--GGGGTGGCTTCCTCATCCACTAGTGGAAGTGGCGACAAGGTCTACGCTTACCAGATGGTCCGTACGGACTCCCGGGAGCAGAAGCTTGACGCCTTTCTGCAGCCTGTAAG
Mlh1	Del 0|2	0	0	0	0	0	0	5985	0	0	0	0	0	0	0	0	0	0	0	0	0	0	0	0	0	0	0	ATGTGCTAAAACCTGGCCTTTTTTACTCTTTTCTCTCTTGAAACAGACCTTGCTTCCAGGACTTGCTGGGCCTTCTGGGGAGGCAGCTAGACCCACGA|C--GGGTGGCTTCCTCATCCACTAGTGGAAGTGGCGACAAGGTCTACGCTTACCAGATGGTCCGTACGGACTCCCGGGAGCAGAAGCTTGACGCCTTTCTGCAGCCTGTAAG
Mlh1	Del 0|3	0	0	0	0	0	0	5697	0	0	0	0	0	0	8579	0	0	0	8657	0	0	0	0	0	0	0	0	ATGTGCTAAAACCTGGCCTTTTTTACTCTTTTCTCTCTTGAAACAGACCTTGCTTCCAGGACTTGCTGGGCCTTCTGGGGAGGCAGCTAGACCCACGA|---GGGTGGCTTCCTCATCCACTAGTGGAAGTGGCGACAAGGTCTACGCTTACCAGATGGTCCGTACGGACTCCCGGGAGCAGAAGCTTGACGCCTTTCTGCAGCCTGTAAG
Mlh1	Del 4|14	0	0	0	0	0	0	0	0	0	0	0	0	0	0	6786	0	0	0	0	0	0	0	0	0	0	0	ATGTGCTAAAACCTGGCCTTTTTTACTCTTTTCTCTCTTGAAACAGACCTTGCTTCCAGGACTTGCTGGGCCTTCTGGGGAGGCAGCTAGACCC---- | --------------TCATCCACTAGTGGAAGTGGCGACAAGGTCTACGCTTACCAGATGGTCCGTACGGACTCCCGGGAGCAGAAGCTTGACGCCTTTCTGCAGCCTGTAAG
Mlh1	Del 6|0	0	0	0	0	0	0	0	0	0	0	0	0	0	0	0	12272	0	0	0	0	0	0	0	0	0	0	ATGTGCTAAAACCTGGCCTTTTTTACTCTTTTCTCTCTTGAAACAGACCTTGCTTCCAGGACTTGCTGGGCCTTCTGGGGAGGCAGCTAGAC------|CAGGGGTGGCTTCCTCATCCACTAGTGGAAGTGGCGACAAGGTCTACGCTTACCAGATGGTCCGTACGGACTCCCGGGAGCAGAAGCTTGACGCCTTTCTGCAGCCTGTAAG
Mlh1	Del 4|0	0	0	0	0	0	0	0	0	0	0	0	0	0	0	0	11413	0	0	0	0	0	0	0	0	0	0	ATGTGCTAAAACCTGGCCTTTTTTACTCTTTTCTCTCTTGAAACAGACCTTGCTTCCAGGACTTGCTGGGCCTTCTGGGGAGGCAGCTAGACCC----|CAGGGGTGGCTTCCTCATCCACTAGTGGAAGTGGCGACAAGGTCTACGCTTACCAGATGGTCCGTACGGACTCCCGGGAGCAGAAGCTTGACGCCTTTCTGCAGCCTGTAAG
Mlh1	Del 16|0	0	0	0	0	0	0	0	0	0	0	0	0	0	0	0	0	0	8884	0	0	0	0	0	0	0	0	ATGTGCTAAAACCTGGCCTTTTTTACTCTTTTCTCTCTTGAAACAGACCTTGCTTCCAGGACTTGCTGGGCCTTCTGGGGAGG------------------|CAGGGGTGGCTTCCTCATCCACTAGTGGAAGTGGCGACAAGGTCTACGCTTACCAGATGGTCCGTACGGACTCCCGGGAGCAGAAGCTTGACGCCTTTCTGCAGCCTGTAAG
Mlh1	Del 0|12	0	0	0	0	0	0	0	0	0	0	0	0	0	0	0	0	0	7702	0	0	0	0	0	0	0	0	ATGTGCTAAAACCTGGCCTTTTTTACTCTTTTCTCTCTTGAAACAGACCTTGCTTCCAGGACTTGCTGGGCCTTCTGGGGAGGCAGCTAGACCCACGA|------------CCTCATCCACTAGTGGAAGTGGCGACAAGGTCTACGCTTACCAGATGGTCCGTACGGACTCCCGGGAGCAGAAGCTTGACGCCTTTCTGCAGCCTGTAAG
Mlh1	Ins 1 A	0	0	0	0	0	0	0	0	0	0	0	0	0	0	0	0	0	0	0	0	0	0	0	0	0	0	ATGTGCTAAAACCTGGCCTTTTTTACTCTTTTCTCTCTTGAAACAGACCTTGCTTCCAGGACTTGCTGGGCCTTCTGGGGAGGCAGCTAGACCCACGA{A}|CAGGGGTGGCTTCCTCATCCACTAGTGGAAGTGGCGACAAGGTCTACGCTTACCAGATGGTCCGTACGGACTCCCGGGAGCAGAAGCTTGACGCCTTTCTGCAGCCTGTAAG
Mlh1	Del 8|0	0	0	0	0	0	0	0	0	0	0	0	0	0	0	0	0	0	0	0	0	6764	0	0	0	0	0	ATGTGCTAAAACCTGGCCTTTTTTACTCTTTTCTCTCTTGAAACAGACCTTGCTTCCAGGACTTGCTGGGCCTTCTGGGGAGGCAGCTAG--------|CAGGGGTGGCTTCCTCATCCACTAGTGGAAGTGGCGACAAGGTCTACGCTTACCAGATGGTCCGTACGGACTCCCGGGAGCAGAAGCTTGACGCCTTTCTGCAGCCTGTAAG
Mlh1	Del 7|0	0	0	0	0	0	0	0	0	0	0	0	0	0	0	0	0	0	0	0	2625	0	0	0	0	0	0	ATGTGCTAAAACCTGGCCTTTTTTACTCTTTTCTCTCTTGAAACAGACCTTGCTTCCAGGACTTGCTGGGCCTTCTGGGGAGGCAGCTAGA-------|CAGGGGTGGCTTCCTCATCCACTAGTGGAAGTGGCGACAAGGTCTACGCTTACCAGATGGTCCGTACGGACTCCCGGGAGCAGAAGCTTGACGCCTTTCTGCAGCCTGTAAG
Mlh1	Del 20|9	0	0	0	0	0	0	0	0	0	0	0	0	0	0	0	0	0	0	0	3800	0	0	0	0	0	0	ATGTGCTAAAACCTGGCCTTTTTTACTCTTTTCTCTCTTGAAACAGACCTTGCTTCCAGGACTTGCTGGGCCTTCTGGG----------------------|---------CTTCCTCATCCACTAGTGGAAGTGGCGACAAGGTCTACGCTTACCAGATGGTCCGTACGGACTCCCGGGAGCAGAAGCTTGACGCCTTTCTGCAGCCTGTAAG
Mlh1	Del 1|9	0	0	0	0	0	0	0	0	0	0	0	0	0	0	0	0	0	0	0	0	0	0	12523	4020	9334	310	ATGTGCTAAAACCTGGCCTTTTTTACTCTTTTCTCTCTTGAAACAGACCTTGCTTCCAGGACTTGCTGGGCCTTCTGGGGAGGCAGCTAGACCCACG-|--------CTTCCTCATCCACTAGTGGAAGTGGCGACAAGGTCTACGCTTACCAGATGGTCCGTACGGACTCCCGGGAGCAGAAGCTTGACGCCTTTCTGCAGCCTGTAAG
Mst1	WT	7555	15850	16095	10286	17852	20042	17511	20795	17824	16457	23354	15770	19811	19823	29542	7570	33217	32994	23804	21773	11871	31741	29073	41811	20098	24886	TGGGGTCAATCAAGCCTAAGGAGGGAGTGATAGGCCTGCCCCCACTTAGAAGTGCATTGGCCCTGTTTCCAGCTGTTTGTGTTCTGTGCAACGGTGAGGATTA|CCGTGGCGAGGTAGACGTTACAGAGTCAGGGCGGGAGTGTCAACGCTGGGACCTGCAGCACCCCCACTCGCACCCTTTCCAGCCTGAAAAGTATGTAGGCA
Mst1	Del 1|0	10794	3319	0	0	210	0	0	10468	12773	7759	4448	0	8593	6328	0	11955	0	0	4777	12437	4505	0	7920	7309	6793	10411	TGGGGTCAATCAAGCCTAAGGAGGGAGTGATAGGCCTGCCCCCACTTAGAAGTGCATTGGCCCTGTTTCCAGCTGTTTGTGTTCTGTGCAACGGTGAGGATT-|CCGTGGCGAGGTAGACGTTACAGAGTCAGGGCGGGAGTGTCAACGCTGGGACCTGCAGCACCCCCACTCGCACCCTTTCCAGCCTGAAAAGTATGTAGGCA
Mst1	Ins 1A	0	5888	0	0	0	0	0	0	0	0	0	0	0	0	0	0	0	0	0	0	0	0	0	0	0	0	TGGGGTCAATCAAGCCTAAGGAGGGAGTGATAGGCCTGCCCCCACTTAGAAGTGCATTGGCCCTGTTTCCAGCTGTTTGTGTTCTGTGCAACGGTGAGGATTA{A}|CCGTGGCGAGGTAGACGTTACAGAGTCAGGGCGGGAGTGTCAACGCTGGGACCTGCAGCACCCCCACTCGCACCCTTTCCAGCCTGAAAAGTATGTAGGCA
Mst1	Del 4|0	0	0	4999	0	0	0	0	0	0	0	0	0	0	0	0	0	0	0	0	0	0	0	0	0	0	0	TGGGGTCAATCAAGCCTAAGGAGGGAGTGATAGGCCTGCCCCCACTTAGAAGTGCATTGGCCCTGTTTCCAGCTGTTTGTGTTCTGTGCAACGGTGAG----A|CCGTGGCGAGGTAGACGTTACAGAGTCAGGGCGGGAGTGTCAACGCTGGGACCTGCAGCACCCCCACTCGCACCCTTTCCAGCCTGAAAAGTATGTAGGCA
Mst1	Del 40|8	0	0	0	11317	0	0	0	0	0	0	0	0	0	0	0	0	0	0	0	0	0	0	0	0	0	0	TGGGGTCAATCAAGCCTAAGGAGGGAGTGATAGGCCTGCCCCCACTTAGAAGTGCATTGGCCC---------------------------------------- | --------AGGTAGACGTTACAGAGTCAGGGCGGGAGTGTCAACGCTGGGACCTGCAGCACCCCCACTCGCACCCTTTCCAGCCTGAAAAGTATGTAGGCA
Mst1	Del 31|23	0	0	0	11306	0	0	0	0	0	0	0	0	0	0	0	0	0	0	0	0	0	0	0	0	0	0	TGGGGTCAATCAAGCCTAAGGAGGGAGTGATAGGCCTGCCCCCACTTAGAAGTGCATTGGCCCTGTTTCCAG------------------------------- | -----------------------AGTCAGGGCGGGAGTGTCAACGCTGGGACCTGCAGCACCCCCACTCGCACCCTTTCCAGCCTGAAAAGTATGTAGGCA
Mst1	Del 11|27	0	0	0	0	1876	0	0	0	0	0	0	0	0	0	0	0	0	0	0	0	0	0	0	0	0	0	TGGGGTCAATCAAGCCTAAGGAGGGAGTGATAGGCCTGCCCCCACTTAGAAGTGCATTGGCCCTGTTTCCAGCTGTTTGTGTTCTGTGCAAC----------- | ---------------------------AGGGCGGGAGTGTCAACGCTGGGACCTGCAGCACCCCCACTCGCACCCTTTCCAGCCTGAAAAGTATGTAGGCA
Mst1	Del 2|0	0	0	0	0	1824	0	2685	0	0	0	0	0	0	0	0	0	0	0	0	0	0	0	0	0	0	0	TGGGGTCAATCAAGCCTAAGGAGGGAGTGATAGGCCTGCCCCCACTTAGAAGTGCATTGGCCCTGTTTCCAGCTGTTTGTGTTCTGTGCAACGGTGAGGAT--|CCGTGGCGAGGTAGACGTTACAGAGTCAGGGCGGGAGTGTCAACGCTGGGACCTGCAGCACCCCCACTCGCACCCTTTCCAGCCTGAAAAGTATGTAGGCA
Mst1	Del 4|11	0	0	0	0	495	0	0	0	0	0	0	0	0	0	0	0	0	0	0	2644	0	0	0	0	0	0	TGGGGTCAATCAAGCCTAAGGAGGGAGTGATAGGCCTGCCCCCACTTAGAAGTGCATTGGCCCTGTTTCCAGCTGTTTGTGTTCTGTGCAACGGTGAGG---- | -----------TAGACGTTACAGAGTCAGGGCGGGAGTGTCAACGCTGGGACCTGCAGCACCCCCACTCGCACCCTTTCCAGCCTGAAAAGTATGTAGGCA
Mst1	Del 7|0	0	0	0	0	0	9003	0	0	0	0	0	0	0	0	0	0	0	0	0	0	0	0	0	0	0	0	TGGGGTCAATCAAGCCTAAGGAGGGAGTGATAGGCCTGCCCCCACTTAGAAGTGCATTGGCCCTGTTTCCAGCTGTTTGTGTTCTGTGCAACGGT-------A|CCGTGGCGAGGTAGACGTTACAGAGTCAGGGCGGGAGTGTCAACGCTGGGACCTGCAGCACCCCCACTCGCACCCTTTCCAGCCTGAAAAGTATGTAGGCA
Mst1	Del 7|5	0	0	0	0	0	0	2770	0	0	0	0	0	0	0	7380	0	0	0	0	0	0	0	0	0	0	0	TGGGGTCAATCAAGCCTAAGGAGGGAGTGATAGGCCTGCCCCCACTTAGAAGTGCATTGGCCCTGTTTCCAGCTGTTTGTGTTCTGTGCAACGGTG-------|-----GCGAGGTAGACGTTACAGAGTCAGGGCGGGAGTGTCAACGCTGGGACCTGCAGCACCCCCACTCGCACCCTTTCCAGCCTGAAAAGTATGTAGGCA
Mst1	Del 9|0	0	0	0	0	0	0	0	0	0	0	4928	0	0	0	0	0	0	0	0	0	0	0	0	0	0	0	TGGGGTCAATCAAGCCTAAGGAGGGAGTGATAGGCCTGCCCCCACTTAGAAGTGCATTGGCCCTGTTTCCAGCTGTTTGTGTTCTGTGCAACG---------A|CCGTGGCGAGGTAGACGTTACAGAGTCAGGGCGGGAGTGTCAACGCTGGGACCTGCAGCACCCCCACTCGCACCCTTTCCAGCCTGAAAAGTATGTAGGCA
Mst1	Del 3|5	0	0	0	0	0	0	0	0	0	0	0	14330	0	0	0	0	0	0	0	0	0	0	0	0	0	0	TGGGGTCAATCAAGCCTAAGGAGGGAGTGATAGGCCTGCCCCCACTTAGAAGTGCATTGGCCCTGTTTCCAGCTGTTTGTGTTCTGTGCAACGGTGAGGA--- | -----GCGAGGTAGACGTTACAGAGTCAGGGCGGGAGTGTCAACGCTGGGACCTGCAGCACCCCCACTCGCACCCTTTCCAGCCTGAAAAGTATGTAGGCA
Mst1	Del 1|0	0	0	0	0	0	0	0	0	0	0	0	0	6437	0	0	0	0	0	0	0	0	0	0	0	0	0	TGGGGTCAATCAAGCCTAAGGAGGGAGTGATAGGCCTGCCCCCACTTAGAAGTGCATTGGCCCTGTTTCCAGCTGTTTGTGTTCTGTGCAACGGTGAGGAT-A|CCGTGGCGAGGTAGACGTTACAGAGTCAGGGCGGGAGTGTCAACGCTGGGACCTGCAGCACCCCCACTCGCACCCTTTCCAGCCTGAAAAGTATGTAGGCA
Mst1	Del 9|0	0	0	0	0	0	0	0	0	0	0	0	0	0	6567	0	0	0	0	0	0	0	0	0	0	0	0	TGGGGTCAATCAAGCCTAAGGAGGGAGTGATAGGCCTGCCCCCACTTAGAAGTGCATTGGCCCTGTTTCCAGCTGTTTGTGTTCTGTGCAACGG---------|CCGTGGCGAGGTAGACGTTACAGAGTCAGGGCGGGAGTGTCAACGCTGGGACCTGCAGCACCCCCACTCGCACCCTTTCCAGCCTGAAAAGTATGTAGGCA
Mst1	Del 42|0	0	0	0	0	0	0	0	0	0	0	0	0	0	0	0	13021	0	0	0	0	0	0	0	0	0	0	TGGGGTCAATCAAGCCTAAGGAGGGAGTGATAGGCCTGCCCCCACTTAGAAGTGCATTGGC------------------------------------------|CCGTGGCGAGGTAGACGTTACAGAGTCAGGGCGGGAGTGTCAACGCTGGGACCTGCAGCACCCCCACTCGCACCCTTTCCAGCCTGAAAAGTATGTAGGCA
Mst1	Del 14|2	0	0	0	0	0	0	0	0	0	0	0	0	0	0	0	0	0	0	4746	0	0	0	0	0	0	0	TGGGGTCAATCAAGCCTAAGGAGGGAGTGATAGGCCTGCCCCCACTTAGAAGTGCATTGGCCCTGTTTCCAGCTGTTTGTGTTCTGTGC-------------- | --GTGGCGAGGTAGACGTTACAGAGTCAGGGCGGGAGTGTCAACGCTGGGACCTGCAGCACCCCCACTCGCACCCTTTCCAGCCTGAAAAGTATGTAGGCA
Mst1	Del 7|3	0	0	0	0	0	0	0	0	0	0	0	0	0	0	0	0	0	0	0	0	0	0	2275	1937	1545	2466	TGGGGTCAATCAAGCCTAAGGAGGGAGTGATAGGCCTGCCCCCACTTAGAAGTGCATTGGCCCTGTTTCCAGCTGTTTGTGTTCTGTGCAACGGTG------- | ---TGGCGAGGTAGACGTTACAGAGTCAGGGCGGGAGTGTCAACGCTGGGACCTGCAGCACCCCCACTCGCACCCTTTCCAGCCTGAAAAGTATGTAGGCA
Msx1	WT	5789	34590	22987	12997	45320	23988	24421	32805	24289	34170	33780	13125	40138	22717	23878	7996	7355	19785	43815	48312	29896	64949	78073	92283	105494	119577	TCATGGCCGATCACAGGAAGCCCGGGGCCAAGGAGAGCGTCCTGGTGGCCTCCGAAGGGGCTCAGGCAGCGGGTGGCTCGGTGCAGCACTTGGGCACCCGGCCCGGGT|CTCTGGGCGCCCCGGATGCGCCCTCCTCGCCGCGGCCTCTCGGCCATTTCTCAGTCGGAGGACTCCTCAAGCTGCCAGAAGATGCTCTGGTGAAGGCCGAAAGCCCCGAGAAACTAGA
Msx1	Del 0|2	11246	14375	0	0	0	0	2397	8833	0	2383	0	13633	0	8282	0	14812	0	10614	0	0	0	0	3366	3135	13595	8292	TCATGGCCGATCACAGGAAGCCCGGGGCCAAGGAGAGCGTCCTGGTGGCCTCCGAAGGGGCTCAGGCAGCGGGTGGCTCGGTGCAGCACTTGGGCACCCGGCCCGGGT|--CTGGGCGCCCCGGATGCGCCCTCCTCGCCGCGGCCTCTCGGCCATTTCTCAGTCGGAGGACTCCTCAAGCTGCCAGAAGATGCTCTGGTGAAGGCCGAAAGCCCCGAGAAACTAGA
Msx1	Del 0|4	7074	0	0	0	0	0	0	0	0	1476	0	13072	0	0	0	0	0	0	0	0	0	0	0	0	0	0	TCATGGCCGATCACAGGAAGCCCGGGGCCAAGGAGAGCGTCCTGGTGGCCTCCGAAGGGGCTCAGGCAGCGGGTGGCTCGGTGCAGCACTTGGGCACCCGGCCCGGGT|----GGGCGCCCCGGATGCGCCCTCCTCGCCGCGGCCTCTCGGCCATTTCTCAGTCGGAGGACTCCTCAAGCTGCCAGAAGATGCTCTGGTGAAGGCCGAAAGCCCCGAGAAACTAGA
Msx1	Del 28|7	1667	0	0	0	0	0	0	0	0	0	0	0	0	0	0	0	0	0	0	0	0	0	0	0	0	0	TCATGGCCGATCACAGGAAGCCCGGGGCCAAGGAGAGCGTCCTGGTGGCCTCCGAAGGGGCTCAGGCAGCGGGTGGCTCG---------------------------- | -------CGCCCCGGATGCGCCCTCCTCGCCGCGGCCTCTCGGCCATTTCTCAGTCGGAGGACTCCTCAAGCTGCCAGAAGATGCTCTGGTGAAGGCCGAAAGCCCCGAGAAACTAGA
Msx1	Del 1|6	1614	0	0	0	0	0	0	0	0	0	0	0	0	0	7892	0	8766	0	0	0	0	0	0	0	0	0	TCATGGCCGATCACAGGAAGCCCGGGGCCAAGGAGAGCGTCCTGGTGGCCTCCGAAGGGGCTCAGGCAGCGGGTGGCTCGGTGCAGCACTTGGGCACCCGGCCCGGG- | ------GCGCCCCGGATGCGCCCTCCTCGCCGCGGCCTCTCGGCCATTTCTCAGTCGGAGGACTCCTCAAGCTGCCAGAAGATGCTCTGGTGAAGGCCGAAAGCCCCGAGAAACTAGA
Msx1	Del 0|9	0	0	12992	0	0	0	0	0	0	0	0	0	0	0	0	0	0	0	0	0	0	0	0	0	0	0	TCATGGCCGATCACAGGAAGCCCGGGGCCAAGGAGAGCGTCCTGGTGGCCTCCGAAGGGGCTCAGGCAGCGGGTGGCTCGGTGCAGCACTTGGGCACCCGGCCCGGGT|---------CCCCGGATGCGCCCTCCTCGCCGCGGCCTCTCGGCCATTTCTCAGTCGGAGGACTCCTCAAGCTGCCAGAAGATGCTCTGGTGAAGGCCGAAAGCCCCGAGAAACTAGA
Msx1	Del 1|7	0	0	12477	0	0	0	0	0	0	0	0	0	0	0	0	0	0	0	0	0	0	0	0	0	0	0	TCATGGCCGATCACAGGAAGCCCGGGGCCAAGGAGAGCGTCCTGGTGGCCTCCGAAGGGGCTCAGGCAGCGGGTGGCTCGGTGCAGCACTTGGGCACCCGGCCCGGG- | -------CGCCCCGGATGCGCCCTCCTCGCCGCGGCCTCTCGGCCATTTCTCAGTCGGAGGACTCCTCAAGCTGCCAGAAGATGCTCTGGTGAAGGCCGAAAGCCCCGAGAAACTAGA
Msx1	Del 4|23	0	0	0	16549	0	0	0	0	0	0	0	0	0	0	0	0	0	0	0	0	0	0	0	0	0	0	TCATGGCCGATCACAGGAAGCCCGGGGCCAAGGAGAGCGTCCTGGTGGCCTCCGAAGGGGCTCAGGCAGCGGGTGGCTCGGTGCAGCACTTGGGCACCCGGCCC---- | -----------------------TCCTCGCCGCGGCCTCTCGGCCATTTCTCAGTCGGAGGACTCCTCAAGCTGCCAGAAGATGCTCTGGTGAAGGCCGAAAGCCCCGAGAAACTAGA
Msx1	Del 5|3	0	0	0	0	5327	0	0	0	0	0	0	0	0	0	0	0	0	0	0	0	0	0	0	0	0	0	TCATGGCCGATCACAGGAAGCCCGGGGCCAAGGAGAGCGTCCTGGTGGCCTCCGAAGGGGCTCAGGCAGCGGGTGGCTCGGTGCAGCACTTGGGCACCCGGCC----- | ---TGGGCGCCCCGGATGCGCCCTCCTCGCCGCGGCCTCTCGGCCATTTCTCAGTCGGAGGACTCCTCAAGCTGCCAGAAGATGCTCTGGTGAAGGCCGAAAGCCCCGAGAAACTAGA
Msx1	Del 0|18	0	0	0	0	0	14284	0	0	0	0	0	0	0	0	0	0	0	0	0	0	0	0	0	0	0	0	TCATGGCCGATCACAGGAAGCCCGGGGCCAAGGAGAGCGTCCTGGTGGCCTCCGAAGGGGCTCAGGCAGCGGGTGGCTCGGTGCAGCACTTGGGCACCCGGCCCGGGT|------------------CGCCCTCCTCGCCGCGGCCTCTCGGCCATTTCTCAGTCGGAGGACTCCTCAAGCTGCCAGAAGATGCTCTGGTGAAGGCCGAAAGCCCCGAGAAACTAGA
Msx1	Del 0|8	0	0	0	0	0	13897	0	0	0	0	0	0	0	0	0	0	0	0	0	0	0	0	0	0	0	0	TCATGGCCGATCACAGGAAGCCCGGGGCCAAGGAGAGCGTCCTGGTGGCCTCCGAAGGGGCTCAGGCAGCGGGTGGCTCGGTGCAGCACTTGGGCACCCGGCCCGGGT|--------GCCCCGGATGCGCCCTCCTCGCCGCGGCCTCTCGGCCATTTCTCAGTCGGAGGACTCCTCAAGCTGCCAGAAGATGCTCTGGTGAAGGCCGAAAGCCCCGAGAAACTAGA
Msx1	Del 9|10	0	0	0	0	0	0	5656	0	0	0	0	0	0	0	0	0	0	0	0	0	0	0	0	0	0	0	TCATGGCCGATCACAGGAAGCCCGGGGCCAAGGAGAGCGTCCTGGTGGCCTCCGAAGGGGCTCAGGCAGCGGGTGGCTCGGTGCAGCACTTGGGCACCC--------- | ----------CCCGGATGCGCCCTCCTCGCCGCGGCCTCTCGGCCATTTCTCAGTCGGAGGACTCCTCAAGCTGCCAGAAGATGCTCTGGTGAAGGCCGAAAGCCCCGAGAAACTAGA
Msx1	Del 7|6	0	0	0	0	0	0	5332	0	0	0	0	0	0	0	0	0	0	0	0	0	0	0	0	0	0	0	TCATGGCCGATCACAGGAAGCCCGGGGCCAAGGAGAGCGTCCTGGTGGCCTCCGAAGGGGCTCAGGCAGCGGGTGGCTCGGTGCAGCACTTGGGCACCCGG------- | ------GCGCCCCGGATGCGCCCTCCTCGCCGCGGCCTCTCGGCCATTTCTCAGTCGGAGGACTCCTCAAGCTGCCAGAAGATGCTCTGGTGAAGGCCGAAAGCCCCGAGAAACTAGA
Msx1	Del 2|0	0	0	0	0	0	0	0	8784	0	0	0	0	0	0	0	0	0	0	0	0	0	0	0	0	0	0	TCATGGCCGATCACAGGAAGCCCGGGGCCAAGGAGAGCGTCCTGGTGGCCTCCGAAGGGGCTCAGGCAGCGGGTGGCTCGGTGCAGCACTTGGGCACCCGGCCCGG--|CTCTGGGCGCCCCGGATGCGCCCTCCTCGCCGCGGCCTCTCGGCCATTTCTCAGTCGGAGGACTCCTCAAGCTGCCAGAAGATGCTCTGGTGAAGGCCGAAAGCCCCGAGAAACTAGA
Msx1	Del 0|1	0	0	0	0	0	0	0	0	18184	0	0	0	0	0	7215	0	0	0	0	0	0	0	0	0	0	0	TCATGGCCGATCACAGGAAGCCCGGGGCCAAGGAGAGCGTCCTGGTGGCCTCCGAAGGGGCTCAGGCAGCGGGTGGCTCGGTGCAGCACTTGGGCACCCGGCCCGGGT|-TCTGGGCGCCCCGGATGCGCCCTCCTCGCCGCGGCCTCTCGGCCATTTCTCAGTCGGAGGACTCCTCAAGCTGCCAGAAGATGCTCTGGTGAAGGCCGAAAGCCCCGAGAAACTAGA
Msx1	Del 10|3	0	0	0	0	0	0	0	0	0	0	8999	0	0	0	0	0	0	0	0	0	0	0	0	0	0	0	TCATGGCCGATCACAGGAAGCCCGGGGCCAAGGAGAGCGTCCTGGTGGCCTCCGAAGGGGCTCAGGCAGCGGGTGGCTCGGTGCAGCACTTGGGCACC---------- | ---TGGGCGCCCCGGATGCGCCCTCCTCGCCGCGGCCTCTCGGCCATTTCTCAGTCGGAGGACTCCTCAAGCTGCCAGAAGATGCTCTGGTGAAGGCCGAAAGCCCCGAGAAACTAGA
Msx1	Del 1|12	0	0	0	0	0	0	0	0	0	0	8880	0	0	0	0	0	0	0	0	0	0	0	0	0	0	0	TCATGGCCGATCACAGGAAGCCCGGGGCCAAGGAGAGCGTCCTGGTGGCCTCCGAAGGGGCTCAGGCAGCGGGTGGCTCGGTGCAGCACTTGGGCACCCGGCCCGGG- | ------------CGGATGCGCCCTCCTCGCCGCGGCCTCTCGGCCATTTCTCAGTCGGAGGACTCCTCAAGCTGCCAGAAGATGCTCTGGTGAAGGCCGAAAGCCCCGAGAAACTAGA
Msx1	Del 1|5	0	0	0	0	0	0	0	0	0	0	0	0	0	8108	0	0	0	0	0	0	7082	0	0	0	0	0	TCATGGCCGATCACAGGAAGCCCGGGGCCAAGGAGAGCGTCCTGGTGGCCTCCGAAGGGGCTCAGGCAGCGGGTGGCTCGGTGCAGCACTTGGGCACCCGGCCCGGG- | -----GGCGCCCCGGATGCGCCCTCCTCGCCGCGGCCTCTCGGCCATTTCTCAGTCGGAGGACTCCTCAAGCTGCCAGAAGATGCTCTGGTGAAGGCCGAAAGCCCCGAGAAACTAGA
Msx1	Del 2|7	0	0	0	0	0	0	0	0	0	0	0	0	0	0	0	14241	0	0	0	0	0	0	0	0	0	0	TCATGGCCGATCACAGGAAGCCCGGGGCCAAGGAGAGCGTCCTGGTGGCCTCCGAAGGGGCTCAGGCAGCGGGTGGCTCGGTGCAGCACTTGGGCACCCGGCCCGG-- | -------CGCCCCGGATGCGCCCTCCTCGCCGCGGCCTCTCGGCCATTTCTCAGTCGGAGGACTCCTCAAGCTGCCAGAAGATGCTCTGGTGAAGGCCGAAAGCCCCGAGAAACTAGA
Msx1	Del 0|12	0	0	0	0	0	0	0	0	0	0	0	0	0	0	0	0	9507	0	0	0	0	0	0	0	0	0	TCATGGCCGATCACAGGAAGCCCGGGGCCAAGGAGAGCGTCCTGGTGGCCTCCGAAGGGGCTCAGGCAGCGGGTGGCTCGGTGCAGCACTTGGGCACCCGGCCCGGGT|------------CGGATGCGCCCTCCTCGCCGCGGCCTCTCGGCCATTTCTCAGTCGGAGGACTCCTCAAGCTGCCAGAAGATGCTCTGGTGAAGGCCGAAAGCCCCGAGAAACTAGA
Msx1	Del 33|18	0	0	0	0	0	0	0	0	0	0	0	0	0	0	0	0	0	11707	0	0	0	0	0	0	0	0	TCATGGCCGATCACAGGAAGCCCGGGGCCAAGGAGAGCGTCCTGGTGGCCTCCGAAGGGGCTCAGGCAGCGGGTG--------------------------------- | ------------------CGCCCTCCTCGCCGCGGCCTCTCGGCCATTTCTCAGTCGGAGGACTCCTCAAGCTGCCAGAAGATGCTCTGGTGAAGGCCGAAAGCCCCGAGAAACTAGA
Msx1	Del 1|0	0	0	0	0	0	0	0	0	0	0	0	0	0	0	0	0	0	9636	0	0	0	0	0	0	0	0	TCATGGCCGATCACAGGAAGCCCGGGGCCAAGGAGAGCGTCCTGGTGGCCTCCGAAGGGGCTCAGGCAGCGGGTGGCTCGGTGCAGCACTTGGGCACCCGGCCCGGG-|CTCTGGGCGCCCCGGATGCGCCCTCCTCGCCGCGGCCTCTCGGCCATTTCTCAGTCGGAGGACTCCTCAAGCTGCCAGAAGATGCTCTGGTGAAGGCCGAAAGCCCCGAGAAACTAGA
Msx1	Del 10|19	0	0	0	0	0	0	0	0	0	0	0	0	0	0	0	0	0	0	10474	0	0	0	0	0	0	0	TCATGGCCGATCACAGGAAGCCCGGGGCCAAGGAGAGCGTCCTGGTGGCCTCCGAAGGGGCTCAGGCAGCGGGTGGCTCGGTGCAGCACTTGGGCACC----------------------------GCCCTCCTCGCCGCGGCCTCTCGGCCATTTCTCAGTCGGAGGACTCCTCAAGCTGCCAGAAGATGCTCTGGTGAAGGCCGAAAGCCCCGAGAAACTAGA
Msx1	Del 3|1	0	0	0	0	0	0	0	0	0	0	0	0	0	0	0	0	0	0	0	0	7516	0	0	0	0	0	TCATGGCCGATCACAGGAAGCCCGGGGCCAAGGAGAGCGTCCTGGTGGCCTCCGAAGGGGCTCAGGCAGCGGGTGGCTCGGTGCAGCACTTGGGCACCCGGCCCG---|-TCTGGGCGCCCCGGATGCGCCCTCCTCGCCGCGGCCTCTCGGCCATTTCTCAGTCGGAGGACTCCTCAAGCTGCCAGAAGATGCTCTGGTGAAGGCCGAAAGCCCCGAGAAACTAGA
Msx1	Ins 1 C	0	0	0	0	0	0	0	0	0	0	0	0	0	0	0	0	0	0	0	0	0	0	8019	6922	12813	17547	TCATGGCCGATCACAGGAAGCCCGGGGCCAAGGAGAGCGTCCTGGTGGCCTCCGAAGGGGCTCAGGCAGCGGGTGGCTCGGTGCAGCACTTGGGCACCCGGCCCGGGT|{C}CTCTGGGCGCCCCGGATGCGCCCTCCTCGCCGCGGCCTCTCGGCCATTTCTCAGTCGGAGGACTCCTCAAGCTGCCAGAAGATGCTCTGGTGAAGGCCGAAAGCCCCGAGAAACTAGA
Nf1	WT	18080	19025	0	10720	22356	14714	22675	20895	15444	15346	17255	16483	11446	15220	18028	4704	22304	27676	26932	24091	25291	29985	29387	51474	39677	24791	GACTGTGTGGAGGGATTATGTTTTAAATGTAGGATGTGTGGCTGTGGCTATTGGCCTGACTGTGTGTTTCTTTAGGTGTATGGTGCTACTTACCTACAAAAGCTCTTGGACCCTTT|ATTACGAGTCATCATCACATCTTCGGATTGGCAACATGTTAGCTTTGAAGTGGATCCTACCAGGTTTGTCATCTTGTCACAGTTGCTCCCTCACTC
Nf1	Del 4|5	1736	0	0	0	0	0	0	0	0	0	0	0	0	0	0	0	0	0	0	0	0	0	0	0	0	0	GACTGTGTGGAGGGATTATGTTTTAAATGTAGGATGTGTGGCTGTGGCTATTGGCCTGACTGTGTGTTTCTTTAGGTGTATGGTGCTACTTACCTACAAAAGCTCTTGGACC----|-----GAGTCATCATCACATCTTCGGATTGGCAACATGTTAGCTTTGAAGTGGATCCTACCAGGTTTGTCATCTTGTCACAGTTGCTCCCTCACTC
Nf1	Ins 1 A	0	9309	0	13812	0	0	0	5519	1127	8103	4877	0	0	0	0	0	0	6708	0	4795	0	0	10727	14775	17056	14835	GACTGTGTGGAGGGATTATGTTTTAAATGTAGGATGTGTGGCTGTGGCTATTGGCCTGACTGTGTGTTTCTTTAGGTGTATGGTGCTACTTACCTACAAAAGCTCTTGGACCCTTT|{A}ATTACGAGTCATCATCACATCTTCGGATTGGCAACATGTTAGCTTTGAAGTGGATCCTACCAGGTTTGTCATCTTGTCACAGTTGCTCCCTCACTC
Nf1	Ins 1 T	0	2509	0	0	0	0	0	0	0	0	0	0	0	0	0	0	0	0	0	0	0	0	0	0	0	0	GACTGTGTGGAGGGATTATGTTTTAAATGTAGGATGTGTGGCTGTGGCTATTGGCCTGACTGTGTGTTTCTTTAGGTGTATGGTGCTACTTACCTACAAAAGCTCTTGGACCCTTT|{T}ATTACGAGTCATCATCACATCTTCGGATTGGCAACATGTTAGCTTTGAAGTGGATCCTACCAGGTTTGTCATCTTGTCACAGTTGCTCCCTCACTC
Nf1	Del 0|3	0	2440	0	0	0	0	4602	0	0	0	0	8080	0	0	0	0	0	0	0	0	0	0	0	0	0	0	GACTGTGTGGAGGGATTATGTTTTAAATGTAGGATGTGTGGCTGTGGCTATTGGCCTGACTGTGTGTTTCTTTAGGTGTATGGTGCTACTTACCTACAAAAGCTCTTGGACCCTTT|---ACGAGTCATCATCACATCTTCGGATTGGCAACATGTTAGCTTTGAAGTGGATCCTACCAGGTTTGTCATCTTGTCACAGTTGCTCCCTCACTC
Nf1	Del 1|0	0	0	0	0	6800	0	0	0	4996	0	0	0	0	0	0	0	0	0	0	0	6523	0	0	0	0	0	GACTGTGTGGAGGGATTATGTTTTAAATGTAGGATGTGTGGCTGTGGCTATTGGCCTGACTGTGTGTTTCTTTAGGTGTATGGTGCTACTTACCTACAAAAGCTCTTGGACCCTT-|ATTACGAGTCATCATCACATCTTCGGATTGGCAACATGTTAGCTTTGAAGTGGATCCTACCAGGTTTGTCATCTTGTCACAGTTGCTCCCTCACTC
Nf1	Del 0|2	0	0	0	0	0	7804	0	0	0	8270	0	0	8941	0	0	0	0	0	0	0	0	0	0	0	0	0	GACTGTGTGGAGGGATTATGTTTTAAATGTAGGATGTGTGGCTGTGGCTATTGGCCTGACTGTGTGTTTCTTTAGGTGTATGGTGCTACTTACCTACAAAAGCTCTTGGACCCTTT|--TACGAGTCATCATCACATCTTCGGATTGGCAACATGTTAGCTTTGAAGTGGATCCTACCAGGTTTGTCATCTTGTCACAGTTGCTCCCTCACTC
Nf1	Del 0|2	0	0	0	0	0	7666	0	0	0	0	0	0	0	0	0	0	0	0	0	0	0	0	0	0	0	0	GACTGTGTGGAGGGATTATGTTTTAAATGTAGGATGTGTGGCTGTGGCTATTGGCCTGACTGTGTGTTTCTTTAGGTGTATGGTGCTACTTACCTACAAAAGCTCTTGGACCCTTT|A--ACGAGTCATCATCACATCTTCGGATTGGCAACATGTTAGCTTTGAAGTGGATCCTACCAGGTTTGTCATCTTGTCACAGTTGCTCCCTCACTC
Nf1	Del 2|0 Ins 1C	0	0	0	0	0	0	4444	0	0	0	0	0	0	0	0	0	0	0	0	0	0	0	0	0	0	0	GACTGTGTGGAGGGATTATGTTTTAAATGTAGGATGTGTGGCTGTGGCTATTGGCCTGACTGTGTGTTTCTTTAGGTGTATGGTGCTACTTACCTACAAAAGCTCTTGGACCCT--{C}|ATTACGAGTCATCATCACATCTTCGGATTGGCAACATGTTAGCTTTGAAGTGGATCCTACCAGGTTTGTCATCTTGTCACAGTTGCTCCCTCACTC
Nf1	Del 3|5	0	0	0	0	0	0	0	5528	0	0	0	0	0	0	0	0	0	0	0	0	0	0	0	0	0	0	GACTGTGTGGAGGGATTATGTTTTAAATGTAGGATGTGTGGCTGTGGCTATTGGCCTGACTGTGTGTTTCTTTAGGTGTATGGTGCTACTTACCTACAAAAGCTCTTGGACCC---|-----GAGTCATCATCACATCTTCGGATTGGCAACATGTTAGCTTTGAAGTGGATCCTACCAGGTTTGTCATCTTGTCACAGTTGCTCCCTCACTC
Nf1	Del 17|2	0	0	0	0	0	0	0	0	4863	0	0	0	0	0	0	0	0	0	0	0	0	0	0	0	0	0	GACTGTGTGGAGGGATTATGTTTTAAATGTAGGATGTGTGGCTGTGGCTATTGGCCTGACTGTGTGTTTCTTTAGGTGTATGGTGCTACTTACCTACAA-----------------|--TACGAGTCATCATCACATCTTCGGATTGGCAACATGTTAGCTTTGAAGTGGATCCTACCAGGTTTGTCATCTTGTCACAGTTGCTCCCTCACTC
Nf1	Del 0|1	0	0	0	0	0	0	0	0	0	0	1876	0	0	0	0	0	0	0	0	0	0	0	0	0	0	0	GACTGTGTGGAGGGATTATGTTTTAAATGTAGGATGTGTGGCTGTGGCTATTGGCCTGACTGTGTGTTTCTTTAGGTGTATGGTGCTACTTACCTACAAAAGCTCTTGGACCCTTT|-TTACGAGTCATCATCACATCTTCGGATTGGCAACATGTTAGCTTTGAAGTGGATCCTACCAGGTTTGTCATCTTGTCACAGTTGCTCCCTCACTC
Nf1	Del 10|0	0	0	0	0	0	0	0	0	0	0	0	0	0	3945	0	0	0	0	0	0	0	0	0	0	0	0	GACTGTGTGGAGGGATTATGTTTTAAATGTAGGATGTGTGGCTGTGGCTATTGGCCTGACTGTGTGTTTCTTTAGGTGTATGGTGCTACTTACCTACAAAAGCTCT----------|ATTACGAGTCATCATCACATCTTCGGATTGGCAACATGTTAGCTTTGAAGTGGATCCTACCAGGTTTGTCATCTTGTCACAGTTGCTCCCTCACTC
Nf1	Del 1|5	0	0	0	0	0	0	0	0	0	0	0	0	0	0	4909	0	0	0	0	0	0	0	0	0	0	0	GACTGTGTGGAGGGATTATGTTTTAAATGTAGGATGTGTGGCTGTGGCTATTGGCCTGACTGTGTGTTTCTTTAGGTGTATGGTGCTACTTACCTACAAAAGCTCTTGGACCCTT-|-----GAGTCATCATCACATCTTCGGATTGGCAACATGTTAGCTTTGAAGTGGATCCTACCAGGTTTGTCATCTTGTCACAGTTGCTCCCTCACTC
Nf1	Del 3|0	0	0	0	0	0	0	0	0	0	0	0	0	0	0	4859	0	0	0	5090	0	0	0	0	0	0	0	GACTGTGTGGAGGGATTATGTTTTAAATGTAGGATGTGTGGCTGTGGCTATTGGCCTGACTGTGTGTTTCTTTAGGTGTATGGTGCTACTTACCTACAAAAGCTCTTGGACCC---|ATTACGAGTCATCATCACATCTTCGGATTGGCAACATGTTAGCTTTGAAGTGGATCCTACCAGGTTTGTCATCTTGTCACAGTTGCTCCCTCACTC
Nf1	Del 0|22 (D23 I1 A)	0	0	0	0	0	0	0	0	0	0	0	0	0	0	0	7836	0	0	0	0	0	0	0	0	0	0	GACTGTGTGGAGGGATTATGTTTTAAATGTAGGATGTGTGGCTGTGGCTATTGGCCTGACTGTGTGTTTCTTTAGGTGTATGGTGCTACTTACCTACAAAAGCTCTTGGACCCTTT|A----------------------CGGATTGGCAACATGTTAGCTTTGAAGTGGATCCTACCAGGTTTGTCATCTTGTCACAGTTGCTCCCTCACTC
Nf1	Del 2|20	0	0	0	0	0	0	0	0	0	0	0	0	0	0	0	7756	0	0	0	0	0	0	0	0	0	0	GACTGTGTGGAGGGATTATGTTTTAAATGTAGGATGTGTGGCTGTGGCTATTGGCCTGACTGTGTGTTTCTTTAGGTGTATGGTGCTACTTACCTACAAAAGCTCTTGGACCCT--|--------------------CATCTTCGGATTGGCAACATGTTAGCTTTGAAGTGGATCCTACCAGGTTTGTCATCTTGTCACAGTTGCTCCCTCACTC
Nf1	Del 0|1 (D2 I1A)	0	0	0	0	0	0	0	0	0	0	0	0	0	0	0	0	0	0	0	2813	0	0	0	0	0	0	GACTGTGTGGAGGGATTATGTTTTAAATGTAGGATGTGTGGCTGTGGCTATTGGCCTGACTGTGTGTTTCTTTAGGTGTATGGTGCTACTTACCTACAAAAGCTCTTGGACCCTTT|A-TACGAGTCATCATCACATCTTCGGATTGGCAACATGTTAGCTTTGAAGTGGATCCTACCAGGTTTGTCATCTTGTCACAGTTGCTCCCTCACTC
Notch3	WT	6509	34506	18365	13838	37065	50046	24653	54626	13937	31240	34126	14595	8441	25689	28273	27547	12750	58513	38438	33909	17354	58459	72525	71658	53856	58360	CATACGCTGTGAGAGCCAGGTGGATGAGTGCCGCAGCCAGCCCTGTCGATATGGGGGCAAATGTCTAGACTTGGTGGACAAGTACCTCTGCCGTTGTCC|TCCCGGAACCACAGGTGGGGCCTGGGGCTGGGCTATAACAGTACGTGGGGGTGTGTGGGGGTCTGTGATGAATTTGTAACTGGTGCTTGACAATAGTAGGTACTCTTGCCATACTTCTTCCCTCCCT
Notch3	Del 1|0	9519	5187	11500	0	0	0	9691	0	0	11327	0	0	0	0	8380	29991	0	0	0	0	0	0	1128	889	128	432	CATACGCTGTGAGAGCCAGGTGGATGAGTGCCGCAGCCAGCCCTGTCGATATGGGGGCAAATGTCTAGACTTGGTGGACAAGTACCTCTGCCGTTGTC-|TCCCGGAACCACAGGTGGGGCCTGGGGCTGGGCTATAACAGTACGTGGGGGTGTGTGGGGGTCTGTGATGAATTTGTAACTGGTGCTTGACAATAGTAGGTACTCTTGCCATACTTCTTCCCTCCCT
Notch3	Del 3|0	1631	5426	7770	0	5695	0	0	0	11720	0	0	0	0	0	0	0	0	0	7543	0	4400	0	0	0	0	0	CATACGCTGTGAGAGCCAGGTGGATGAGTGCCGCAGCCAGCCCTGTCGATATGGGGGCAAATGTCTAGACTTGGTGGACAAGTACCTCTGCCGTTG---|TCCCGGAACCACAGGTGGGGCCTGGGGCTGGGCTATAACAGTACGTGGGGGTGTGTGGGGGTCTGTGATGAATTTGTAACTGGTGCTTGACAATAGTAGGTACTCTTGCCATACTTCTTCCCTCCCT
Notch3	Del 0|1	0	5322	0	0	0	0	0	13834	0	0	8509	0	0	8728	8234	18039	0	0	0	5184	0	0	714	1201	1463	907	CATACGCTGTGAGAGCCAGGTGGATGAGTGCCGCAGCCAGCCCTGTCGATATGGGGGCAAATGTCTAGACTTGGTGGACAAGTACCTCTGCCGTTGTCC|-CCCGGAACCACAGGTGGGGCCTGGGGCTGGGCTATAACAGTACGTGGGGGTGTGTGGGGGTCTGTGATGAATTTGTAACTGGTGCTTGACAATAGTAGGTACTCTTGCCATACTTCTTCCCTCCCT
Notch3	Ins 44 bp	0	4338	0	0	0	0	0	0	0	0	0	0	0	0	0	0	0	0	0	0	0	0	0	0	0	0	CATACGCTGTGAGAGCCAGGTGGATGAGTGCCGCAGCCAGCCCTGTCGATATGGGGGCAAATGTCTAGACTTGGTGGACAAGTACCTCTGCCGTTGTCC|{GCTGCTTGCAAACAAAAAAACCACCGCTACCAGCGGTGGTTTGT}TCCCGGAACCACAGGTGGGGCCTGGGGCTGGGCTATAACAGTACGTGGGGGTGTGTGGGGGTCTGTGATGAATTTGTAACTGGTGCTTGACAATAGTAGGTACTCTTGCCATACTTCTTCCCTCCCT
Notch3	Del 15|0	0	0	0	19923	0	0	0	0	0	0	0	0	0	0	0	0	0	0	0	0	0	0	0	0	0	0	CATACGCTGTGAGAGCCAGGTGGATGAGTGCCGCAGCCAGCCCTGTCGATATGGGGGCAAATGTCTAGACTTGGTGGACAAGT---------------C|TCCCGGAACCACAGGTGGGGCCTGGGGCTGGGCTATAACAGTACGTGGGGGTGTGTGGGGGTCTGTGATGAATTTGTAACTGGTGCTTGACAATAGTAGGTACTCTTGCCATACTTCTTCCCTCCCT
Notch3	Del 6|5	0	0	0	19217	5471	0	0	0	0	0	0	0	0	0	0	0	0	0	0	0	0	0	0	0	0	0	CATACGCTGTGAGAGCCAGGTGGATGAGTGCCGCAGCCAGCCCTGTCGATATGGGGGCAAATGTCTAGACTTGGTGGACAAGTACCTCTGCCG------|-----GAACCACAGGTGGGGCCTGGGGCTGGGCTATAACAGTACGTGGGGGTGTGTGGGGGTCTGTGATGAATTTGTAACTGGTGCTTGACAATAGTAGGTACTCTTGCCATACTTCTTCCCTCCCT
Notch3	Del 6|0	0	0	0	0	0	0	0	9145	0	0	0	0	0	0	0	0	0	0	0	0	0	0	0	0	0	0	CATACGCTGTGAGAGCCAGGTGGATGAGTGCCGCAGCCAGCCCTGTCGATATGGGGGCAAATGTCTAGACTTGGTGGACAAGTACCTCTGCCG------|TCCCGGAACCACAGGTGGGGCCTGGGGCTGGGCTATAACAGTACGTGGGGGTGTGTGGGGGTCTGTGATGAATTTGTAACTGGTGCTTGACAATAGTAGGTACTCTTGCCATACTTCTTCCCTCCCT
Notch3	Del 2|0	0	0	0	0	0	0	0	0	12054	0	0	0	0	0	0	0	0	0	0	0	0	0	0	0	0	0	CATACGCTGTGAGAGCCAGGTGGATGAGTGCCGCAGCCAGCCCTGTCGATATGGGGGCAAATGTCTAGACTTGGTGGACAAGTACCTCTGCCGTTGT--|TCCCGGAACCACAGGTGGGGCCTGGGGCTGGGCTATAACAGTACGTGGGGGTGTGTGGGGGTCTGTGATGAATTTGTAACTGGTGCTTGACAATAGTAGGTACTCTTGCCATACTTCTTCCCTCCCT
Notch3	Del 0|2	0	0	0	0	0	0	0	0	0	0	8180	15081	0	0	0	0	0	0	0	2730	0	0	0	0	0	0	CATACGCTGTGAGAGCCAGGTGGATGAGTGCCGCAGCCAGCCCTGTCGATATGGGGGCAAATGTCTAGACTTGGTGGACAAGTACCTCTGCCGTTGTCC|--CCGGAACCACAGGTGGGGCCTGGGGCTGGGCTATAACAGTACGTGGGGGTGTGTGGGGGTCTGTGATGAATTTGTAACTGGTGCTTGACAATAGTAGGTACTCTTGCCATACTTCTTCCCTCCCT
Notch3	Del 8|0	0	0	0	0	0	0	0	0	0	0	0	14303	0	0	0	0	0	0	0	0	0	0	0	0	0	0	CATACGCTGTGAGAGCCAGGTGGATGAGTGCCGCAGCCAGCCCTGTCGATATGGGGGCAAATGTCTAGACTTGGTGGACAAGTACCTCTGC--------|TCCCGGAACCACAGGTGGGGCCTGGGGCTGGGCTATAACAGTACGTGGGGGTGTGTGGGGGTCTGTGATGAATTTGTAACTGGTGCTTGACAATAGTAGGTACTCTTGCCATACTTCTTCCCTCCCT
Notch3	Del 5|0	0	0	0	0	0	0	0	0	0	0	0	0	29047	0	0	0	0	0	0	0	0	0	0	0	0	0	CATACGCTGTGAGAGCCAGGTGGATGAGTGCCGCAGCCAGCCCTGTCGATATGGGGGCAAATGTCTAGACTTGGTGGACAAGTACCTCTGCCG-----C|TCCCGGAACCACAGGTGGGGCCTGGGGCTGGGCTATAACAGTACGTGGGGGTGTGTGGGGGTCTGTGATGAATTTGTAACTGGTGCTTGACAATAGTAGGTACTCTTGCCATACTTCTTCCCTCCCT
Notch3	Del 4|0	0	0	0	0	0	0	0	0	0	0	0	0	0	8622	0	0	0	0	0	0	0	0	0	0	0	0	CATACGCTGTGAGAGCCAGGTGGATGAGTGCCGCAGCCAGCCCTGTCGATATGGGGGCAAATGTCTAGACTTGGTGGACAAGTACCTCTGCCGT----C|TCCCGGAACCACAGGTGGGGCCTGGGGCTGGGCTATAACAGTACGTGGGGGTGTGTGGGGGTCTGTGATGAATTTGTAACTGGTGCTTGACAATAGTAGGTACTCTTGCCATACTTCTTCCCTCCCT
Notch3	Del 14|44	0	0	0	0	0	0	0	0	0	0	0	0	0	0	0	0	22928	0	0	0	0	0	0	0	0	0	CATACGCTGTGAGAGCCAGGTGGATGAGTGCCGCAGCCAGCCCTGTCGATATGGGGGCAAATGTCTAGACTTGGTGGACAAGTAC--------------|--------------------------------------------GTGGGGGTGTGTGGGGGTCTGTGATGAATTTGTAACTGGTGCTTGACAATAGTAGGTACTCTTGCCATACTTCTTCCCTCCCT
Notch3	Del 29|12	0	0	0	0	0	0	0	0	0	0	0	0	0	0	0	0	19498	0	0	0	0	0	0	0	0	0	CATACGCTGTGAGAGCCAGGTGGATGAGTGCCGCAGCCAGCCCTGTCGATATGGGGGCAAATGTCTAGAC-----------------------------|------------AGGTGGGGCCTGGGGCTGGGCTATAACAGTACGTGGGGGTGTGTGGGGGTCTGTGATGAATTTGTAACTGGTGCTTGACAATAGTAGGTACTCTTGCCATACTTCTTCCCTCCCT
Notch3	Del 16|0	0	0	0	0	0	0	0	0	0	0	0	0	0	0	0	0	0	0	7703	0	0	0	0	0	0	0	CATACGCTGTGAGAGCCAGGTGGATGAGTGCCGCAGCCAGCCCTGTCGATATGGGGGCAAATGTCTAGACTTGGTGGACAAG----------------C|TCCCGGAACCACAGGTGGGGCCTGGGGCTGGGCTATAACAGTACGTGGGGGTGTGTGGGGGTCTGTGATGAATTTGTAACTGGTGCTTGACAATAGTAGGTACTCTTGCCATACTTCTTCCCTCCCT
Notch3	Del 14|0	0	0	0	0	0	0	0	0	0	0	0	0	0	0	0	0	0	0	0	0	3418	0	0	0	0	0	CATACGCTGTGAGAGCCAGGTGGATGAGTGCCGCAGCCAGCCCTGTCGATATGGGGGCAAATGTCTAGACTTGGTGGACAAGTAC--------------|TCCCGGAACCACAGGTGGGGCCTGGGGCTGGGCTATAACAGTACGTGGGGGTGTGTGGGGGTCTGTGATGAATTTGTAACTGGTGCTTGACAATAGTAGGTACTCTTGCCATACTTCTTCCCTCCCT
Notch3	Ins 1 C	0	0	0	0	0	0	0	0	0	0	0	0	0	0	0	0	0	0	0	0	0	0	500	1079	1451	537	CATACGCTGTGAGAGCCAGGTGGATGAGTGCCGCAGCCAGCCCTGTCGATATGGGGGCAAATGTCTAGACTTGGTGGACAAGTACCTCTGCCGTTGTCC|{C}TCCCGGAACCACAGGTGGGGCCTGGGGCTGGGCTATAACAGTACGTGGGGGTGTGTGGGGGTCTGTGATGAATTTGTAACTGGTGCTTGACAATAGTAGGTACTCTTGCCATACTTCTTCCCTCCCT
P53	WT	6139	17468	23533	16231	23532	15412	25069	25265	18339	19268	28961	13688	4943	24070	31763	11134	21233	25784	23853	33195	18426	18382	57409	63202	77759	33172	AGCCATAGGGGTTTGTTTGTTTGTATGTTTTTTAATTGACAAGTTATGCATCCATACAGTACACAATCTCTTCTCTCTACAGATGACTGCCATGGAGGAGTCACAGTCGGATATCAGCCTCGAGCTCCCTCTGA|GCCAGGAGACATTTTCAGGCTTATGGAAACTGTGAGTGGATCTTTTTGGGGCCCTTAAGATACATCCCGCCATACCTGTATCCTCCCCTTGCCTGAGAGAA
P53	Del 1|0	20239	10253	0	0	3470	0	11044	13726	0	10066	0	13716	34738	8132	17185	36100	33553	0	4806	7128	9545	5180	1238	729	964	613	AGCCATAGGGGTTTGTTTGTTTGTATGTTTTTTAATTGACAAGTTATGCATCCATACAGTACACAATCTCTTCTCTCTACAGATGACTGCCATGGAGGAGTCACAGTCGGATATCAGCCTCGAGCTCCCTCTG-|GCCAGGAGACATTTTCAGGCTTATGGAAACTGTGAGTGGATCTTTTTGGGGCCCTTAAGATACATCCCGCCATACCTGTATCCTCCCCTTGCCTGAGAGAA
P53	Del 23|27	2076	0	0	0	0	0	0	0	0	0	0	0	0	0	0	0	0	0	0	0	0	0	0	0	0	0	AGCCATAGGGGTTTGTTTGTTTGTATGTTTTTTAATTGACAAGTTATGCATCCATACAGTACACAATCTCTTCTCTCTACAGATGACTGCCATGGAGGAGTCACAGTCGGA-----------------------|---------------------------AACTGTGAGTGGATCTTTTTGGGGCCCTTAAGATACATCCCGCCATACCTGTATCCTCCCCTTGCCTGAGAGAA
P53	Del 4|0	0	2965	0	0	0	0	0	0	0	0	0	0	0	0	0	0	0	0	0	0	0	0	0	0	0	0	AGCCATAGGGGTTTGTTTGTTTGTATGTTTTTTAATTGACAAGTTATGCATCCATACAGTACACAATCTCTTCTCTCTACAGATGACTGCCATGGAGGAGTCACAGTCGGATATCAGCCTCGAGCTCCCT----|GCCAGGAGACATTTTCAGGCTTATGGAAACTGTGAGTGGATCTTTTTGGGGCCCTTAAGATACATCCCGCCATACCTGTATCCTCCCCTTGCCTGAGAGAA
P53	Del 0|1	0	0	0	19618	0	0	0	0	0	0	0	0	0	0	0	0	0	0	0	0	0	0	0	0	0	0	AGCCATAGGGGTTTGTTTGTTTGTATGTTTTTTAATTGACAAGTTATGCATCCATACAGTACACAATCTCTTCTCTCTACAGATGACTGCCATGGAGGAGTCACAGTCGGATATCAGCCTCGAGCTCCCTCTGA|-CCAGGAGACATTTTCAGGCTTATGGAAACTGTGAGTGGATCTTTTTGGGGCCCTTAAGATACATCCCGCCATACCTGTATCCTCCCCTTGCCTGAGAGAA
P53	Del 6|10	0	0	0	0	0	8787	0	0	0	0	0	0	0	0	0	0	0	0	0	0	0	0	0	0	0	0	AGCCATAGGGGTTTGTTTGTTTGTATGTTTTTTAATTGACAAGTTATGCATCCATACAGTACACAATCTCTTCTCTCTACAGATGACTGCCATGGAGGAGTCACAGTCGGATATCAGCCTCGAGCTCC------|----------ATTTTCAGGCTTATGGAAACTGTGAGTGGATCTTTTTGGGGCCCTTAAGATACATCCCGCCATACCTGTATCCTCCCCTTGCCTGAGAGAA
P53	Del 2|0	0	0	0	0	0	8410	0	0	16101	10499	6927	0	0	0	0	0	0	0	0	0	0	0	0	0	0	0	AGCCATAGGGGTTTGTTTGTTTGTATGTTTTTTAATTGACAAGTTATGCATCCATACAGTACACAATCTCTTCTCTCTACAGATGACTGCCATGGAGGAGTCACAGTCGGATATCAGCCTCGAGCTCCCTCT--|GCCAGGAGACATTTTCAGGCTTATGGAAACTGTGAGTGGATCTTTTTGGGGCCCTTAAGATACATCCCGCCATACCTGTATCCTCCCCTTGCCTGAGAGAA
P53	Del 5|9	0	0	0	0	0	0	0	0	16306	0	0	0	0	0	0	0	0	0	0	0	0	0	0	0	0	0	AGCCATAGGGGTTTGTTTGTTTGTATGTTTTTTAATTGACAAGTTATGCATCCATACAGTACACAATCTCTTCTCTCTACAGATGACTGCCATGGAGGAGTCACAGTCGGATATCAGCCTCGAGCTCCC-----|---------CATTTTCAGGCTTATGGAAACTGTGAGTGGATCTTTTTGGGGCCCTTAAGATACATCCCGCCATACCTGTATCCTCCCCTTGCCTGAGAGAA
P53	Ins 1 A	0	0	0	0	0	0	0	0	0	0	6499	0	0	0	0	0	0	0	0	6468	0	5383	456	332	814	238	AGCCATAGGGGTTTGTTTGTTTGTATGTTTTTTAATTGACAAGTTATGCATCCATACAGTACACAATCTCTTCTCTCTACAGATGACTGCCATGGAGGAGTCACAGTCGGATATCAGCCTCGAGCTCCCTCTGA{T}|GCCAGGAGACATTTTCAGGCTTATGGAAACTGTGAGTGGATCTTTTTGGGGCCCTTAAGATACATCCCGCCATACCTGTATCCTCCCCTTGCCTGAGAGAA
P53	Del 8|21	0	0	0	0	0	0	0	0	0	0	0	0	0	9166	0	0	0	0	0	0	0	0	0	0	0	0	AGCCATAGGGGTTTGTTTGTTTGTATGTTTTTTAATTGACAAGTTATGCATCCATACAGTACACAATCTCTTCTCTCTACAGATGACTGCCATGGAGGAGTCACAGTCGGATATCAGCCTCGAGCT--------|---------------------TATGGAAACTGTGAGTGGATCTTTTTGGGGCCCTTAAGATACATCCCGCCATACCTGTATCCTCCCCTTGCCTGAGAGAA
P53	Ins 1 T	0	0	0	0	0	0	0	0	0	0	0	0	0	0	0	0	0	6227	0	0	0	0	0	0	0	0	AGCCATAGGGGTTTGTTTGTTTGTATGTTTTTTAATTGACAAGTTATGCATCCATACAGTACACAATCTCTTCTCTCTACAGATGACTGCCATGGAGGAGTCACAGTCGGATATCAGCCTCGAGCTCCCTCTGA|GCCAGGAGACATTTTCAGGCTTATGGAAACTGTGAGTGGATCTTTTTGGGGCCCTTAAGATACATCCCGCCATACCTGTATCCTCCCCTTGCCTGAGAGAA
P53	Del 4|0	0	0	0	0	0	0	0	0	0	0	0	14659	0	0	0	0	0	0	0	0	0	0	0	0	0	0	AGCCATAGGGGTTTGTTTGTTTGTATGTTTTTTAATTGACAAGTTATGCATCCATACAGTACACAATCTCTTCTCTCTACAGATGACTGCCATGGAGGAGTCACAGTCGGATATCAGCCTCGAGCTCCC----A|GCCAGGAGACATTTTCAGGCTTATGGAAACTGTGAGTGGATCTTTTTGGGGCCCTTAAGATACATCCCGCCATACCTGTATCCTCCCCTTGCCTGAGAGAA
P53	Del 5|3	0	0	0	0	0	0	0	0	0	0	0	0	0	0	0	0	0	0	3511	0	0	0	0	0	0	0	AGCCATAGGGGTTTGTTTGTTTGTATGTTTTTTAATTGACAAGTTATGCATCCATACAGTACACAATCTCTTCTCTCTACAGATGACTGCCATGGAGGAGTCACAGTCGGATATCAGCCTCGAGCTCCC-----|---AGGAGACATTTTCAGGCTTATGGAAACTGTGAGTGGATCTTTTTGGGGCCCTTAAGATACATCCCGCCATACCTGTATCCTCCCCTTGCCTGAGAGAA
P53	Del 8|0	0	0	0	0	0	0	0	0	0	0	0	0	0	0	0	0	0	0	0	0	0	0	1834	278	1676	856	AGCCATAGGGGTTTGTTTGTTTGTATGTTTTTTAATTGACAAGTTATGCATCCATACAGTACACAATCTCTTCTCTCTACAGATGACTGCCATGGAGGAGTCACAGTCGGATATCAGCCTCGAGCT--------|GCCAGGAGACATTTTCAGGCTTATGGAAACTGTGAGTGGATCTTTTTGGGGCCCTTAAGATACATCCCGCCATACCTGTATCCTCCCCTTGCCTGAGAGAA
Pik3r1	WT	33756	43212	26554	11263	36559	20578	55595	38142	14083	17927	44315	47766	44767	30842	29252	45618	46703	34260	41193	40601	35217	34616	77904	44630	40344	44952	AGTGTGTGGTTACTCAAAGTTGAAAAGTAAGTATGGTCTTATACTGTGTTCATTTTAGGGAAGAAGTGAATGAAAAACTCCGAGACACTGCTGATGGGACCTTTT|TGGTACGAGACGCATCTACTAAAATGCACGGCGATTACACTCTTACACTAAGGTGAGCCAGGAAGTCAGCTGTAATTGCGATGTCTCAGTTGTCATGA
Pik3r1	Del 1|0	2835	0	10074	0	0	0	0	0	0	0	0	0	0	0	0	0	0	0	2140	0	0	0	1313	1846	930	207	AGTGTGTGGTTACTCAAAGTTGAAAAGTAAGTATGGTCTTATACTGTGTTCATTTTAGGGAAGAAGTGAATGAAAAACTCCGAGACACTGCTGATGGGACCTTT-|TGGTACGAGACGCATCTACTAAAATGCACGGCGATTACACTCTTACACTAAGGTGAGCCAGGAAGTCAGCTGTAATTGCGATGTCTCAGTTGTCATGA
Pik3r1	Del 8|0	0	0	0	16222	0	0	0	0	0	0	0	0	0	0	0	0	0	0	0	0	0	0	0	0	0	0	AGTGTGTGGTTACTCAAAGTTGAAAAGTAAGTATGGTCTTATACTGTGTTCATTTTAGGGAAGAAGTGAATGAAAAACTCCGAGACACTGCTGATGG--------|TGGTACGAGACGCATCTACTAAAATGCACGGCGATTACACTCTTACACTAAGGTGAGCCAGGAAGTCAGCTGTAATTGCGATGTCTCAGTTGTCATGA
Pik3r1	Del 0|4	0	0	0	15326	0	0	0	0	0	0	0	0	0	0	0	0	0	0	0	0	0	0	0	0	0	0	AGTGTGTGGTTACTCAAAGTTGAAAAGTAAGTATGGTCTTATACTGTGTTCATTTTAGGGAAGAAGTGAATGAAAAACTCCGAGACACTGCTGATGGGACCTTTT|----ACGAGACGCATCTACTAAAATGCACGGCGATTACACTCTTACACTAAGGTGAGCCAGGAAGTCAGCTGTAATTGCGATGTCTCAGTTGTCATGA
Pik3r1	Del 4|11	0	0	0	0	5709	0	0	0	0	0	0	0	0	0	0	0	0	0	0	0	0	0	0	0	0	0	AGTGTGTGGTTACTCAAAGTTGAAAAGTAAGTATGGTCTTATACTGTGTTCATTTTAGGGAAGAAGTGAATGAAAAACTCCGAGACACTGCTGATGGGACC----|-----------GCATCTACTAAAATGCACGGCGATTACACTCTTACACTAAGGTGAGCCAGGAAGTCAGCTGTAATTGCGATGTCTCAGTTGTCATGA
Pik3r1	Del 2|2	0	0	0	0	0	11796	0	0	0	0	0	0	0	0	0	0	0	0	0	0	0	0	0	0	0	0	AGTGTGTGGTTACTCAAAGTTGAAAAGTAAGTATGGTCTTATACTGTGTTCATTTTAGGGAAGAAGTGAATGAAAAACTCCGAGACACTGCTGATGGGACCTT--|--GTACGAGACGCATCTACTAAAATGCACGGCGATTACACTCTTACACTAAGGTGAGCCAGGAAGTCAGCTGTAATTGCGATGTCTCAGTTGTCATGA
Pik3r1	Del 0|7 (D8 I1T)	0	0	0	0	0	11064	0	0	0	0	0	0	0	0	0	0	0	0	0	0	0	0	0	0	0	0	AGTGTGTGGTTACTCAAAGTTGAAAAGTAAGTATGGTCTTATACTGTGTTCATTTTAGGGAAGAAGTGAATGAAAAACTCCGAGACACTGCTGATGGGACCTTTT|T-------GACGCATCTACTAAAATGCACGGCGATTACACTCTTACACTAAGGTGAGCCAGGAAGTCAGCTGTAATTGCGATGTCTCAGTTGTCATGA
Pik3r1	Del 0|8 (D9 I1T)	0	0	0	0	0	0	9510	0	0	0	0	0	0	0	0	0	0	0	0	0	0	0	0	0	0	0	AGTGTGTGGTTACTCAAAGTTGAAAAGTAAGTATGGTCTTATACTGTGTTCATTTTAGGGAAGAAGTGAATGAAAAACTCCGAGACACTGCTGATGGGACCTTTT|T--------ACGCATCTACTAAAATGCACGGCGATTACACTCTTACACTAAGGTGAGCCAGGAAGTCAGCTGTAATTGCGATGTCTCAGTTGTCATGA
Pik3r1	Del 4|0	0	0	0	0	0	0	0	11740	13388	0	0	0	0	0	0	0	0	0	0	0	0	0	0	0	0	0	AGTGTGTGGTTACTCAAAGTTGAAAAGTAAGTATGGTCTTATACTGTGTTCATTTTAGGGAAGAAGTGAATGAAAAACTCCGAGACACTGCTGATGGGACC----|TGGTACGAGACGCATCTACTAAAATGCACGGCGATTACACTCTTACACTAAGGTGAGCCAGGAAGTCAGCTGTAATTGCGATGTCTCAGTTGTCATGA
Pik3r1	Del 3|0	0	0	0	0	0	0	0	0	13394	10073	0	0	0	0	0	0	0	0	0	0	0	0	0	0	0	0	AGTGTGTGGTTACTCAAAGTTGAAAAGTAAGTATGGTCTTATACTGTGTTCATTTTAGGGAAGAAGTGAATGAAAAACTCCGAGACACTGCTGATGGGACCT---|TGGTACGAGACGCATCTACTAAAATGCACGGCGATTACACTCTTACACTAAGGTGAGCCAGGAAGTCAGCTGTAATTGCGATGTCTCAGTTGTCATGA
Pik3r1	Del 0|3	0	0	0	0	0	0	0	0	0	9557	0	0	0	0	0	0	0	0	0	0	0	0	0	0	0	0	AGTGTGTGGTTACTCAAAGTTGAAAAGTAAGTATGGTCTTATACTGTGTTCATTTTAGGGAAGAAGTGAATGAAAAACTCCGAGACACTGCTGATGGGACCTTTT|---TACGAGACGCATCTACTAAAATGCACGGCGATTACACTCTTACACTAAGGTGAGCCAGGAAGTCAGCTGTAATTGCGATGTCTCAGTTGTCATGA
Pik3r1	Ins 1 T	0	0	0	0	0	0	0	0	0	0	9128	0	0	0	0	0	0	6482	0	0	7691	0	0	0	0	0	AGTGTGTGGTTACTCAAAGTTGAAAAGTAAGTATGGTCTTATACTGTGTTCATTTTAGGGAAGAAGTGAATGAAAAACTCCGAGACACTGCTGATGGGACCTTTT|{T}TGGTACGAGACGCATCTACTAAAATGCACGGCGATTACACTCTTACACTAAGGTGAGCCAGGAAGTCAGCTGTAATTGCGATGTCTCAGTTGTCATGA
Pik3r1	Del 3|2	0	0	0	0	0	0	0	0	0	0	0	0	0	0	8313	0	0	0	0	0	0	0	0	0	0	0	AGTGTGTGGTTACTCAAAGTTGAAAAGTAAGTATGGTCTTATACTGTGTTCATTTTAGGGAAGAAGTGAATGAAAAACTCCGAGACACTGCTGATGGGACCT---|--GTACGAGACGCATCTACTAAAATGCACGGCGATTACACTCTTACACTAAGGTGAGCCAGGAAGTCAGCTGTAATTGCGATGTCTCAGTTGTCATGA
Pik3r1	Del 2|6	0	0	0	0	0	0	0	0	0	0	0	0	0	0	0	0	0	0	0	0	0	0	1362	1210	431	86	AGTGTGTGGTTACTCAAAGTTGAAAAGTAAGTATGGTCTTATACTGTGTTCATTTTAGGGAAGAAGTGAATGAAAAACTCCGAGACACTGCTGATGGGACCTT--|------GAGACGCATCTACTAAAATGCACGGCGATTACACTCTTACACTAAGGTGAGCCAGGAAGTCAGCTGTAATTGCGATGTCTCAGTTGTCATGA
Pten	WT	1640	7850	4504	4215	7254	6191	3908	8373	7362	8248	9884	4652	1535	9984	9838	2381	4039	5041	7962	14887	2990	10059	15406	27748	36520	23039	CTTTTGTCTCCCTCCTCCCTCTGCCCCCTGGGCCTATCAGGGAGTCACAATTCCCAGTCAGAGGCGCTATGTATATTATTATAGCTACCTGCTAAAAAATCACCTGGATTACAGAC|CCGTGGCACTGCTGTTTCACAAGATGATGTTTGAAACTATTCCAATGTTCAGTGGCGGAACTTGCAGTAAGTGCTCTAAATTCTTAGCTGTCTGTGTGTCGGA
Pten	Del 4|0	2977	0	0	5965	0	0	0	4489	5998	0	0	5029	6689	0	0	4312	6506	0	0	0	0	0	3123	3520	2469	619	CTTTTGTCTCCCTCCTCCCTCTGCCCCCTGGGCCTATCAGGGAGTCACAATTCCCAGTCAGAGGCGCTATGTATATTATTATAGCTACCTGCTAAAAAATCACCTGGATTAC----|CCGTGGCACTGCTGTTTCACAAGATGATGTTTGAAACTATTCCAATGTTCAGTGGCGGAACTTGCAGTAAGTGCTCTAAATTCTTAGCTGTCTGTGTGTCGGA
Pten	Del 5|0	1711	1087	0	0	0	0	0	0	0	0	0	0	0	0	0	0	0	0	0	0	0	0	0	0	0	0	CTTTTGTCTCCCTCCTCCCTCTGCCCCCTGGGCCTATCAGGGAGTCACAATTCCCAGTCAGAGGCGCTATGTATATTATTATAGCTACCTGCTAAAAAATCACCTGGATTA-----|CCGTGGCACTGCTGTTTCACAAGATGATGTTTGAAACTATTCCAATGTTCAGTGGCGGAACTTGCAGTAAGTGCTCTAAATTCTTAGCTGTCTGTGTGTCGGA
Pten	Del 22|5	499	0	0	0	0	0	0	0	0	0	0	0	0	0	0	0	0	0	0	0	0	0	0	0	0	0	CTTTTGTCTCCCTCCTCCCTCTGCCCCCTGGGCCTATCAGGGAGTCACAATTCCCAGTCAGAGGCGCTATGTATATTATTATAGCTACCTGCTA----------------------|-----GCACTGCTGTTTCACAAGATGATGTTTGAAACTATTCCAATGTTCAGTGGCGGAACTTGCAGTAAGTGCTCTAAATTCTTAGCTGTCTGTGTGTCGGA
Pten	Del 12|0	407	0	0	0	0	0	0	0	0	0	0	0	0	0	0	0	0	0	0	0	0	0	0	0	0	0	CTTTTGTCTCCCTCCTCCCTCTGCCCCCTGGGCCTATCAGGGAGTCACAATTCCCAGTCAGAGGCGCTATGTATATTATTATAGCTACCTGCTAAAAAATCACC------------|CCGTGGCACTGCTGTTTCACAAGATGATGTTTGAAACTATTCCAATGTTCAGTGGCGGAACTTGCAGTAAGTGCTCTAAATTCTTAGCTGTCTGTGTGTCGGA
Pten	Del 9|0	0	1272	0	0	0	0	0	0	0	0	0	0	0	0	0	0	0	0	0	0	0	0	0	0	0	0	CTTTTGTCTCCCTCCTCCCTCTGCCCCCTGGGCCTATCAGGGAGTCACAATTCCCAGTCAGAGGCGCTATGTATATTATTATAGCTACCTGCTAAAAAATCACCTGG---------|CCGTGGCACTGCTGTTTCACAAGATGATGTTTGAAACTATTCCAATGTTCAGTGGCGGAACTTGCAGTAAGTGCTCTAAATTCTTAGCTGTCTGTGTGTCGGA
Pten	Del 7|0	0	1203	0	0	0	0	0	0	0	0	0	0	0	0	0	0	0	0	0	0	0	0	0	0	0	0	CTTTTGTCTCCCTCCTCCCTCTGCCCCCTGGGCCTATCAGGGAGTCACAATTCCCAGTCAGAGGCGCTATGTATATTATTATAGCTACCTGCTAAAAAATCACCTGGAT-------|CCGTGGCACTGCTGTTTCACAAGATGATGTTTGAAACTATTCCAATGTTCAGTGGCGGAACTTGCAGTAAGTGCTCTAAATTCTTAGCTGTCTGTGTGTCGGA
Pten	Del 0|2	0	1162	0	0	0	0	0	0	0	0	0	0	0	0	0	0	0	2500	0	0	0	2803	0	0	0	0	CTTTTGTCTCCCTCCTCCCTCTGCCCCCTGGGCCTATCAGGGAGTCACAATTCCCAGTCAGAGGCGCTATGTATATTATTATAGCTACCTGCTAAAAAATCACCTGGATTACAGAC|--GTGGCACTGCTGTTTCACAAGATGATGTTTGAAACTATTCCAATGTTCAGTGGCGGAACTTGCAGTAAGTGCTCTAAATTCTTAGCTGTCTGTGTGTCGGA
Pten	Del 1|0	0	1153	0	0	0	0	0	0	0	0	0	0	0	0	0	0	0	0	0	0	0	0	340	628	7519	6216	CTTTTGTCTCCCTCCTCCCTCTGCCCCCTGGGCCTATCAGGGAGTCACAATTCCCAGTCAGAGGCGCTATGTATATTATTATAGCTACCTGCTAAAAAATCACCTGGATTACAG-C|CCGTGGCACTGCTGTTTCACAAGATGATGTTTGAAACTATTCCAATGTTCAGTGGCGGAACTTGCAGTAAGTGCTCTAAATTCTTAGCTGTCTGTGTGTCGGA
Pten	Ins 2 AC	0	1134	0	0	0	0	0	0	0	0	0	0	0	0	0	0	0	0	0	0	0	0	0	0	0	0	CTTTTGTCTCCCTCCTCCCTCTGCCCCCTGGGCCTATCAGGGAGTCACAATTCCCAGTCAGAGGCGCTATGTATATTATTATAGCTACCTGCTAAAAAATCACCTGGATTACAGAC{AC}|CCGTGGCACTGCTGTTTCACAAGATGATGTTTGAAACTATTCCAATGTTCAGTGGCGGAACTTGCAGTAAGTGCTCTAAATTCTTAGCTGTCTGTGTGTCGGA
Pten	Ins 1 A	0	1081	0	0	0	0	0	0	0	0	0	0	0	0	0	0	0	0	0	2742	0	0	0	0	0	0	CTTTTGTCTCCCTCCTCCCTCTGCCCCCTGGGCCTATCAGGGAGTCACAATTCCCAGTCAGAGGCGCTATGTATATTATTATAGCTACCTGCTAAAAAATCACCTGGATTACAGAC{A}|CCGTGGCACTGCTGTTTCACAAGATGATGTTTGAAACTATTCCAATGTTCAGTGGCGGAACTTGCAGTAAGTGCTCTAAATTCTTAGCTGTCTGTGTGTCGGA
Pten	Del 1|0	0	0	4653	0	0	0	920	0	0	9514	0	5152	0	2958	5714	0	6759	2635	0	4886	727	0	576	837	442	183	CTTTTGTCTCCCTCCTCCCTCTGCCCCCTGGGCCTATCAGGGAGTCACAATTCCCAGTCAGAGGCGCTATGTATATTATTATAGCTACCTGCTAAAAAATCACCTGGATTACAGA-|CCGTGGCACTGCTGTTTCACAAGATGATGTTTGAAACTATTCCAATGTTCAGTGGCGGAACTTGCAGTAAGTGCTCTAAATTCTTAGCTGTCTGTGTGTCGGA
Pten	Del 15|4	0	0	0	6840	0	0	0	0	0	0	0	0	0	0	0	0	0	0	0	0	0	0	0	0	0	0	CTTTTGTCTCCCTCCTCCCTCTGCCCCCTGGGCCTATCAGGGAGTCACAATTCCCAGTCAGAGGCGCTATGTATATTATTATAGCTACCTGCTAAAAAATC---------------|----GGCACTGCTGTTTCACAAGATGATGTTTGAAACTATTCCAATGTTCAGTGGCGGAACTTGCAGTAAGTGCTCTAAATTCTTAGCTGTCTGTGTGTCGGA
Pten	Del 2|0	0	0	0	0	1187	0	0	0	0	0	0	0	0	0	0	0	0	0	0	0	0	0	3500	4156	3120	851	CTTTTGTCTCCCTCCTCCCTCTGCCCCCTGGGCCTATCAGGGAGTCACAATTCCCAGTCAGAGGCGCTATGTATATTATTATAGCTACCTGCTAAAAAATCACCTGGATTACAG--|CCGTGGCACTGCTGTTTCACAAGATGATGTTTGAAACTATTCCAATGTTCAGTGGCGGAACTTGCAGTAAGTGCTCTAAATTCTTAGCTGTCTGTGTGTCGGA
Pten	Del 5|2	0	0	0	0	995	0	0	0	0	0	0	0	0	0	0	0	0	0	0	0	0	0	0	0	0	0	CTTTTGTCTCCCTCCTCCCTCTGCCCCCTGGGCCTATCAGGGAGTCACAATTCCCAGTCAGAGGCGCTATGTATATTATTATAGCTACCTGCTAAAAAATCACCTGGATTA-----|--GTGGCACTGCTGTTTCACAAGATGATGTTTGAAACTATTCCAATGTTCAGTGGCGGAACTTGCAGTAAGTGCTCTAAATTCTTAGCTGTCTGTGTGTCGGA
Pten	Del 25|3	0	0	0	0	0	3778	0	0	0	0	0	0	0	0	0	0	0	0	0	0	0	0	0	0	0	0	CTTTTGTCTCCCTCCTCCCTCTGCCCCCTGGGCCTATCAGGGAGTCACAATTCCCAGTCAGAGGCGCTATGTATATTATTATAGCTACCTG-------------------------|---TGGCACTGCTGTTTCACAAGATGATGTTTGAAACTATTCCAATGTTCAGTGGCGGAACTTGCAGTAAGTGCTCTAAATTCTTAGCTGTCTGTGTGTCGGA
Pten	Del 8|0	0	0	0	0	0	3338	0	0	0	0	0	0	0	0	0	0	0	0	0	0	0	0	0	0	0	0	CTTTTGTCTCCCTCCTCCCTCTGCCCCCTGGGCCTATCAGGGAGTCACAATTCCCAGTCAGAGGCGCTATGTATATTATTATAGCTACCTGCTAAAAAATCACCTGGA--------|CCGTGGCACTGCTGTTTCACAAGATGATGTTTGAAACTATTCCAATGTTCAGTGGCGGAACTTGCAGTAAGTGCTCTAAATTCTTAGCTGTCTGTGTGTCGGA
Pten	Del 17|0	0	0	0	0	0	0	760	0	0	0	0	0	0	0	0	0	0	0	0	0	0	0	0	0	0	0	CTTTTGTCTCCCTCCTCCCTCTGCCCCCTGGGCCTATCAGGGAGTCACAATTCCCAGTCAGAGGCGCTATGTATATTATTATAGCTACCTGCTAAAAA-----------------C|CCGTGGCACTGCTGTTTCACAAGATGATGTTTGAAACTATTCCAATGTTCAGTGGCGGAACTTGCAGTAAGTGCTCTAAATTCTTAGCTGTCTGTGTGTCGGA
Pten	Del 2|0	0	0	0	0	0	0	0	0	5960	0	0	0	0	0	0	0	0	0	0	0	0	0	0	0	0	0	CTTTTGTCTCCCTCCTCCCTCTGCCCCCTGGGCCTATCAGGGAGTCACAATTCCCAGTCAGAGGCGCTATGTATATTATTATAGCTACCTGCTAAAAAATCACCTGGATTACA--C|CCGTGGCACTGCTGTTTCACAAGATGATGTTTGAAACTATTCCAATGTTCAGTGGCGGAACTTGCAGTAAGTGCTCTAAATTCTTAGCTGTCTGTGTGTCGGA
Pten	Del 19|21	0	0	0	0	0	0	0	0	0	0	1949	0	0	0	0	0	0	0	0	0	0	0	0	0	0	0	CTTTTGTCTCCCTCCTCCCTCTGCCCCCTGGGCCTATCAGGGAGTCACAATTCCCAGTCAGAGGCGCTATGTATATTATTATAGCTACCTGCTAAAA-------------------|---------------------AGATGATGTTTGAAACTATTCCAATGTTCAGTGGCGGAACTTGCAGTAAGTGCTCTAAATTCTTAGCTGTCTGTGTGTCGGA
Pten	Ins 1 C	0	0	0	0	0	0	0	0	0	0	1941	0	0	0	0	0	0	0	0	0	0	0	0	0	0	0	CTTTTGTCTCCCTCCTCCCTCTGCCCCCTGGGCCTATCAGGGAGTCACAATTCCCAGTCAGAGGCGCTATGTATATTATTATAGCTACCTGCTAAAAAATCACCTGGATTACAGAC{C}|CCGTGGCACTGCTGTTTCACAAGATGATGTTTGAAACTATTCCAATGTTCAGTGGCGGAACTTGCAGTAAGTGCTCTAAATTCTTAGCTGTCTGTGTGTCGGA
Pten	Del 6|5	0	0	0	0	0	0	0	0	0	0	0	0	7185	0	0	0	0	0	0	0	0	0	0	0	0	0	CTTTTGTCTCCCTCCTCCCTCTGCCCCCTGGGCCTATCAGGGAGTCACAATTCCCAGTCAGAGGCGCTATGTATATTATTATAGCTACCTGCTAAAAAATCACCTGGATT------|-----GCACTGCTGTTTCACAAGATGATGTTTGAAACTATTCCAATGTTCAGTGGCGGAACTTGCAGTAAGTGCTCTAAATTCTTAGCTGTCTGTGTGTCGGA
Pten	Del 0|5	0	0	0	0	0	0	0	0	0	0	0	0	0	3063	0	0	0	2628	0	0	0	0	0	0	0	0	CTTTTGTCTCCCTCCTCCCTCTGCCCCCTGGGCCTATCAGGGAGTCACAATTCCCAGTCAGAGGCGCTATGTATATTATTATAGCTACCTGCTAAAAAATCACCTGGATTACAGAC|C-----CACTGCTGTTTCACAAGATGATGTTTGAAACTATTCCAATGTTCAGTGGCGGAACTTGCAGTAAGTGCTCTAAATTCTTAGCTGTCTGTGTGTCGGA
Pten	Del 29|3	0	0	0	0	0	0	0	0	0	0	0	0	0	0	0	4715	0	0	0	0	0	0	0	0	0	0	CTTTTGTCTCCCTCCTCCCTCTGCCCCCTGGGCCTATCAGGGAGTCACAATTCCCAGTCAGAGGCGCTATGTATATTATTATAGCTA-----------------------------|---TGGCACTGCTGTTTCACAAGATGATGTTTGAAACTATTCCAATGTTCAGTGGCGGAACTTGCAGTAAGTGCTCTAAATTCTTAGCTGTCTGTGTGTCGGA
Pten	Del 18|15	0	0	0	0	0	0	0	0	0	0	0	0	0	0	0	0	0	0	1715	0	0	0	0	0	0	0	CTTTTGTCTCCCTCCTCCCTCTGCCCCCTGGGCCTATCAGGGAGTCACAATTCCCAGTCAGAGGCGCTATGTATATTATTATAGCTACCTGCTAAAAA------------------|---------------TTCACAAGATGATGTTTGAAACTATTCCAATGTTCAGTGGCGGAACTTGCAGTAAGTGCTCTAAATTCTTAGCTGTCTGTGTGTCGGA
Pten	Del 2|2	0	0	0	0	0	0	0	0	0	0	0	0	0	0	0	0	0	0	0	0	729	0	0	0	0	0	CTTTTGTCTCCCTCCTCCCTCTGCCCCCTGGGCCTATCAGGGAGTCACAATTCCCAGTCAGAGGCGCTATGTATATTATTATAGCTACCTGCTAAAAAATCACCTGGATTACAG--|--GTGGCACTGCTGTTTCACAAGATGATGTTTGAAACTATTCCAATGTTCAGTGGCGGAACTTGCAGTAAGTGCTCTAAATTCTTAGCTGTCTGTGTGTCGGA
Pten	Del 6|0	0	0	0	0	0	0	0	0	0	0	0	0	0	0	0	0	0	0	0	0	0	0	2899	3275	2268	482	CTTTTGTCTCCCTCCTCCCTCTGCCCCCTGGGCCTATCAGGGAGTCACAATTCCCAGTCAGAGGCGCTATGTATATTATTATAGCTACCTGCTAAAAAATCACCTGGATT------|CCGTGGCACTGCTGTTTCACAAGATGATGTTTGAAACTATTCCAATGTTCAGTGGCGGAACTTGCAGTAAGTGCTCTAAATTCTTAGCTGTCTGTGTGTCGGA
Pten	Del 22|0 (D23 I1)	0	0	0	0	0	0	0	0	0	0	0	0	0	0	0	0	0	0	0	0	0	0	0	312	5647	3842	CTTTTGTCTCCCTCCTCCCTCTGCCCCCTGGGCCTATCAGGGAGTCACAATTCCCAGTCAGAGGCGCTATGTATATTATTATAGCTACCTGCT----------------------C|CCGTGGCACTGCTGTTTCACAAGATGATGTTTGAAACTATTCCAATGTTCAGTGGCGGAACTTGCAGTAAGTGCTCTAAATTCTTAGCTGTCTGTGTGTCGGA
Rasa1	WT	642	794	2627	2761	16259	7089	1389	1006	208	819	1983	3073	9725	6764	2643	724	418	536	3442	6261	8172	14786	55665	107491	48544	26088	AGCGTGCCGGGTCAAGTTACCCGCGGCCCTGCCGGTGGCAGCCGCCCCGTGTCCCGGGCTGGCGGACGCCGACT|TGGTTGCGGCCCTCGGTGGCGGAGCCGCGTCGGGGTCCGGGTTCCTGGGGACCGGGCCGGTGGCCGGTGTCTTGGGGGGCGCCGCGCTGACCGGCAGTGCTGCTG
Rasa1	Del 1|0	464	0	530	1407	1856	1698	218	0	0	345	0	2488	0	0	347	379	152	0	0	638	695	0	4174	2218	2379	1297	AGCGTGCCGGGTCAAGTTACCCGCGGCCCTGCCGGTGGCAGCCGCCCCGTGTCCCGGGCTGGCGGACGCCGACT|TGGTTGCGGCCCTCGGTGGCGGAGCCGCGTCGGGGTCCGGGTTCCTGGGGACCGGGCCGGTGGCCGGTGTCTTGGGGGGCGCCGCGCTGACCGGCAGTGCTGCTG
Rasa1	Del 0|20	246	0	0	0	0	0	0	0	0	0	0	0	0	0	0	0	0	0	0	0	1705	0	0	0	0	0	AGCGTGCCGGGTCAAGTTACCCGCGGCCCTGCCGGTGGCAGCCGCCCCGTGTCCCGGGCTGGCGGACGCCGACT|--------------------GGAGCCGCGTCGGGGTCCGGGTTCCTGGGGACCGGGCCGGTGGCCGGTGTCTTGGGGGGCGCCGCGCTGACCGGCAGTGCTGCTG
Rasa1	Ins 52bp	0	3371	0	0	0	0	0	0	0	0	0	0	0	0	0	0	0	0	0	0	0	0	0	0	0	0	AGCGTGCCGGGTCAAGTTACCCGCGGCCCTGCCGGTGGCAGCCGCCCCGTGTCCCGGGCTGGCGGACGCCGACT|{TTCTACTCTGTTGACAACCATTGTCTCCTCTTATTTTCTTTTCATTTTCTGT}TGGTTGCGGCCCTCGGTGGCGGAGCCGCGTCGGGGTCCGGGTTCCTGGGGACCGGGCCGGTGGCCGGTGTCTTGGGGGGCGCCGCGCTGACCGGCAGTGCTGCTG
Rasa1	Del 9|33	0	1809	0	0	0	0	0	0	0	0	0	0	0	0	0	0	0	0	0	0	0	0	0	0	0	0	AGCGTGCCGGGTCAAGTTACCCGCGGCCCTGCCGGTGGCAGCCGCCCCGTGTCCCGGGCTGGCGG--------- | ---------------------------------GGTCCGGGTTCCTGGGGACCGGGCCGGTGGCCGGTGTCTTGGGGGGCGCCGCGCTGACCGGCAGTGCTGCTG
Rasa1	Del 0|11	0	0	4701	0	0	0	0	0	0	0	0	0	0	0	0	0	0	0	0	0	0	0	0	0	0	0	AGCGTGCCGGGTCAAGTTACCCGCGGCCCTGCCGGTGGCAGCCGCCCCGTGTCCCGGGCTGGCGGACGCCGACT|-----------CTCGGTGGCGGAGCCGCGTCGGGGTCCGGGTTCCTGGGGACCGGGCCGGTGGCCGGTGTCTTGGGGGGCGCCGCGCTGACCGGCAGTGCTGCTG
Rasa1	Del 6|21	0	0	0	0	0	0	1048	0	0	0	0	0	0	0	0	0	0	0	0	0	0	0	0	0	0	0	AGCGTGCCGGGTCAAGTTACCCGCGGCCCTGCCGGTGGCAGCCGCCCCGTGTCCCGGGCTGGCGGACG------ | ---------------------GAGCCGCGTCGGGGTCCGGGTTCCTGGGGACCGGGCCGGTGGCCGGTGTCTTGGGGGGCGCCGCGCTGACCGGCAGTGCTGCTG
Rasa1	Del 10|16	0	0	0	0	0	0	572	0	0	0	0	0	0	0	0	0	0	0	0	0	0	0	0	0	0	0	AGCGTGCCGGGTCAAGTTACCCGCGGCCCTGCCGGTGGCAGCCGCCCCGTGTCCCGGGCTGGCG---------- | ----------------TGGCGGAGCCGCGTCGGGGTCCGGGTTCCTGGGGACCGGGCCGGTGGCCGGTGTCTTGGGGGGCGCCGCGCTGACCGGCAGTGCTGCTG
Rasa1	Del 0|26	0	0	0	0	0	0	0	532	0	0	0	0	0	0	0	0	0	0	0	0	0	0	0	0	0	0	AGCGTGCCGGGTCAAGTTACCCGCGGCCCTGCCGGTGGCAGCCGCCCCGTGTCCCGGGCTGGCGGACGCCGACT|--------------------------GCGTCGGGGTCCGGGTTCCTGGGGACCGGGCCGGTGGCCGGTGTCTTGGGGGGCGCCGCGCTGACCGGCAGTGCTGCTG
Rasa1	Del 45|26	0	0	0	0	0	0	0	419	3145	0	98	0	0	0	0	0	178	0	0	0	0	0	0	0	0	0	AGCGTGCCGGGTCAAGTTACCCGCGGCCC--------------------------------------------- | --------------------------GCGTCGGGGTCCGGGTTCCTGGGGACCGGGCCGGTGGCCGGTGTCTTGGGGGGCGCCGCGCTGACCGGCAGTGCTGCTG
Rasa1	Ins 1 T	0	0	0	0	0	0	0	0	0	0	0	0	0	2939	0	0	0	0	0	0	0	0	3664	4213	9421	4102	AGCGTGCCGGGTCAAGTTACCCGCGGCCCTGCCGGTGGCAGCCGCCCCGTGTCCCGGGCTGGCGGACGCCGACT|{T}TGGTTGCGGCCCTCGGTGGCGGAGCCGCGTCGGGGTCCGGGTTCCTGGGGACCGGGCCGGTGGCCGGTGTCTTGGGGGGCGCCGCGCTGACCGGCAGTGCTGCTG
Rasa1	Del 3|3	0	0	0	0	0	0	0	0	0	0	0	0	0	0	0	75	0	0	0	0	0	0	0	0	0	0	AGCGTGCCGGGTCAAGTTACCCGCGGCCCTGCCGGTGGCAGCCGCCCCGTGTCCCGGGCTGGCGGACGCCG--- | ---TTGCGGCCCTCGGTGGCGGAGCCGCGTCGGGGTCCGGGTTCCTGGGGACCGGGCCGGTGGCCGGTGTCTTGGGGGGCGCCGCGCTGACCGGCAGTGCTGCTG
Rasa1	Del 0|14	0	0	0	0	0	0	0	0	0	0	0	0	0	0	0	0	952	0	0	0	0	0	0	0	0	0	AGCGTGCCGGGTCAAGTTACCCGCGGCCCTGCCGGTGGCAGCCGCCCCGTGTCCCGGGCTGGCGGACGCCGACT|--------------GGTGGCGGAGCCGCGTCGGGGTCCGGGTTCCTGGGGACCGGGCCGGTGGCCGGTGTCTTGGGGGGCGCCGCGCTGACCGGCAGTGCTGCTG
Rasa1	Del 35|20	0	0	0	0	0	0	0	0	0	0	0	0	0	0	0	0	0	4757	0	0	0	0	0	0	0	0	AGCGTGCCGGGTCAAGTTACCCGCGGCCCTGCCGGTGGC----------------------------------- | ----------------------------GGAGCCGCGTCGGGGTCCGGGTTCCTGGGGACCGGGCCGGTGGCCGGTGTCTTGGGGGGCGCCGCGCTGACCGGCAGTGCTGCTG
Rasa1	Del 19|12	0	0	0	0	0	0	0	0	0	0	0	0	0	0	0	0	0	3737	0	0	0	0	0	0	0	0	AGCGTGCCGGGTCAAGTTACCCGCGGCCCTGCCGGTGGCAGCCGCCCCGTGTCCC------------------- | ------------TCGGTGGCGGAGCCGCGTCGGGGTCCGGGTTCCTGGGGACCGGGCCGGTGGCCGGTGTCTTGGGGGGCGCCGCGCTGACCGGCAGTGCTGCTG
Rasa1	Del 0|8	0	0	0	0	0	0	0	0	0	0	0	0	0	0	0	0	0	0	0	0	1164	0	0	0	0	0	AGCGTGCCGGGTCAAGTTACCCGCGGCCCTGCCGGTGGCAGCCGCCCCGTGTCCCGGGCTGGCGGACGCCGACT|--------GCCCTCGGTGGCGGAGCCGCGTCGGGGTCCGGGTTCCTGGGGACCGGGCCGGTGGCCGGTGTCTTGGGGGGCGCCGCGCTGACCGGCAGTGCTGCTG
Rasa1	Del 13|0	0	0	0	0	0	0	0	0	0	0	0	0	0	0	0	0	0	0	0	0	0	0	2962	2344	4896	2185	AGCGTGCCGGGTCAAGTTACCCGCGGCCCTGCCGGTGGCAGCCGCCCCGTGTCCCGGGCTG-------------|TGGTTGCGGCCCTCGGTGGCGGAGCCGCGTCGGGGTCCGGGTTCCTGGGGACCGGGCCGGTGGCCGGTGTCTTGGGGGGCGCCGCGCTGACCGGCAGTGCTGCTG
Rb1	WT	15949	22889	27056	14413	47223	42185	44156	52630	23381	27521	39565	23212	15045	40068	43271	14043	28009	15986	45076	30491	36574	48680	6501	12323	49560	31278	TACAGAAACAGCTGCAATCCCCATTAATGGTTCACCTCGAACACCCAGAAGAGGTCAGAACAGGAGCGCTCGGATAGCAAAACAACTAGAAAATGAT|ACGAGGATTATCGAGGTTCTCTGTAAAGAACACGAGTGTAATATAGATGAGGTAATTTCTCTTACACTTTATTTAAAACAGCTGAAGTAGATATATATGCTAAGTCTGCCTGTCA
Rb1	Del 13|7	24294	0	0	0	0	0	0	0	0	0	0	0	0	0	0	0	0	0	0	0	0	0	0	0	0	0	TACAGAAACAGCTGCAATCCCCATTAATGGTTCACCTCGAACACCCAGAAGAGGTCAGAACAGGAGCGCTCGGATAGCAAAACA-------------|-------TTATCGAGGTTCTCTGTAAAGAACACGAGTGTAATATAGATGAGGTAATTTCTCTTACACTTTATTTAAAACAGCTGAAGTAGATATATATGCTAAGTCTGCCTGTCA
Rb1	Del 1|0	29181	0	0	0	0	0	0	0	0	0	0	0	0	0	0	0	0	0	0	0	0	0	0	0	0	0	TACAGAAACAGCTGCAATCCCCATTAATGGTTCACCTCGAACACCCAGAAGAGGTCAGAACAGGAGCGCTCGGATAGCAAAACAACTAGAAAATGA-|ACGAGGATTATCGAGGTTCTCTGTAAAGAACACGAGTGTAATATAGATGAGGTAATTTCTCTTACACTTTATTTAAAACAGCTGAAGTAGATATATATGCTAAGTCTGCCTGTCA
Rb1	Del 2|0	4014	0	0	16931	0	0	0	0	0	0	0	18826	0	0	0	0	0	6989	0	0	7858	0	0	0	0	0	TACAGAAACAGCTGCAATCCCCATTAATGGTTCACCTCGAACACCCAGAAGAGGTCAGAACAGGAGCGCTCGGATAGCAAAACAACTAGAAAAT--T|ACGAGGATTATCGAGGTTCTCTGTAAAGAACACGAGTGTAATATAGATGAGGTAATTTCTCTTACACTTTATTTAAAACAGCTGAAGTAGATATATATGCTAAGTCTGCCTGTCA
Rb1	Ins 1 T	0	5929	0	0	4733	0	0	0	0	0	9172	0	52223	0	0	0	42702	7310	0	3662	0	0	1990	3953	22107	17480	TACAGAAACAGCTGCAATCCCCATTAATGGTTCACCTCGAACACCCAGAAGAGGTCAGAACAGGAGCGCTCGGATAGCAAAACAACTAGAAAATGAT{T}|ACGAGGATTATCGAGGTTCTCTGTAAAGAACACGAGTGTAATATAGATGAGGTAATTTCTCTTACACTTTATTTAAAACAGCTGAAGTAGATATATATGCTAAGTCTGCCTGTCA
Rb1	Del 1|0	0	3029	0	0	0	0	0	0	0	13622	9795	16418	0	11686	0	0	0	7617	0	0	0	0	1972	4015	23419	16947	TACAGAAACAGCTGCAATCCCCATTAATGGTTCACCTCGAACACCCAGAAGAGGTCAGAACAGGAGCGCTCGGATAGCAAAACAACTAGAAAATG-T|ACGAGGATTATCGAGGTTCTCTGTAAAGAACACGAGTGTAATATAGATGAGGTAATTTCTCTTACACTTTATTTAAAACAGCTGAAGTAGATATATATGCTAAGTCTGCCTGTCA
Rb1	Del 6|2	0	3012	0	0	0	0	0	0	0	0	0	0	0	0	0	0	0	0	0	0	0	0	0	0	0	0	TACAGAAACAGCTGCAATCCCCATTAATGGTTCACCTCGAACACCCAGAAGAGGTCAGAACAGGAGCGCTCGGATAGCAAAACAACTAGAA------|--GAGGATTATCGAGGTTCTCTGTAAAGAACACGAGTGTAATATAGATGAGGTAATTTCTCTTACACTTTATTTAAAACAGCTGAAGTAGATATATATGCTAAGTCTGCCTGTCA
Rb1	Del 0|1	0	2905	0	0	0	0	0	0	0	0	0	0	0	0	0	0	0	0	0	0	0	0	0	0	0	0	TACAGAAACAGCTGCAATCCCCATTAATGGTTCACCTCGAACACCCAGAAGAGGTCAGAACAGGAGCGCTCGGATAGCAAAACAACTAGAAAATGAT|-CGAGGATTATCGAGGTTCTCTGTAAAGAACACGAGTGTAATATAGATGAGGTAATTTCTCTTACACTTTATTTAAAACAGCTGAAGTAGATATATATGCTAAGTCTGCCTGTCA
Rb1	Del 13|0	0	0	13704	0	0	14101	0	0	0	0	0	0	0	0	0	0	0	0	0	0	0	0	0	0	0	0	TACAGAAACAGCTGCAATCCCCATTAATGGTTCACCTCGAACACCCAGAAGAGGTCAGAACAGGAGCGCTCGGATAGCAAAACA-------------|ACGAGGATTATCGAGGTTCTCTGTAAAGAACACGAGTGTAATATAGATGAGGTAATTTCTCTTACACTTTATTTAAAACAGCTGAAGTAGATATATATGCTAAGTCTGCCTGTCA
Rb1	Del 13|2	0	0	13477	0	0	0	0	0	0	0	0	0	0	0	0	0	0	0	0	0	0	0	0	0	0	0	TACAGAAACAGCTGCAATCCCCATTAATGGTTCACCTCGAACACCCAGAAGAGGTCAGAACAGGAGCGCTCGGATAGCAAAACA-------------|--GAGGATTATCGAGGTTCTCTGTAAAGAACACGAGTGTAATATAGATGAGGTAATTTCTCTTACACTTTATTTAAAACAGCTGAAGTAGATATATATGCTAAGTCTGCCTGTCA
Rb1	Del 7|0	0	0	0	0	0	0	10180	0	0	0	0	0	0	0	0	0	0	0	0	0	0	0	0	0	0	0	TACAGAAACAGCTGCAATCCCCATTAATGGTTCACCTCGAACACCCAGAAGAGGTCAGAACAGGAGCGCTCGGATAGCAAAACAACTAG-------T|ACGAGGATTATCGAGGTTCTCTGTAAAGAACACGAGTGTAATATAGATGAGGTAATTTCTCTTACACTTTATTTAAAACAGCTGAAGTAGATATATATGCTAAGTCTGCCTGTCA
Rb1	Del 1|6	0	0	0	0	0	0	9381	0	0	0	0	0	0	0	0	0	0	0	0	0	0	0	0	0	0	0	TACAGAAACAGCTGCAATCCCCATTAATGGTTCACCTCGAACACCCAGAAGAGGTCAGAACAGGAGCGCTCGGATAGCAAAACAACTAGAAAATGA-|------ATTATCGAGGTTCTCTGTAAAGAACACGAGTGTAATATAGATGAGGTAATTTCTCTTACACTTTATTTAAAACAGCTGAAGTAGATATATATGCTAAGTCTGCCTGTCA
Rb1	Del 11|0	0	0	0	0	0	0	0	0	19124	0	0	0	0	0	0	0	0	0	0	0	0	0	0	0	0	0	TACAGAAACAGCTGCAATCCCCATTAATGGTTCACCTCGAACACCCAGAAGAGGTCAGAACAGGAGCGCTCGGATAGCAAAACAA-----------T|ACGAGGATTATCGAGGTTCTCTGTAAAGAACACGAGTGTAATATAGATGAGGTAATTTCTCTTACACTTTATTTAAAACAGCTGAAGTAGATATATATGCTAAGTCTGCCTGTCA
Rb1	Del 1|0	0	0	0	0	0	0	0	0	18440	0	0	0	0	0	0	0	0	0	0	0	0	0	0	0	0	0	TACAGAAACAGCTGCAATCCCCATTAATGGTTCACCTCGAACACCCAGAAGAGGTCAGAACAGGAGCGCTCGGATAGCAAAACAACTAGAAAAT-AT|ACGAGGATTATCGAGGTTCTCTGTAAAGAACACGAGTGTAATATAGATGAGGTAATTTCTCTTACACTTTATTTAAAACAGCTGAAGTAGATATATATGCTAAGTCTGCCTGTCA
Rb1	Del 2|0	0	0	0	0	0	0	0	0	0	13218	0	0	0	0	0	0	0	0	0	0	0	0	0	0	0	0	TACAGAAACAGCTGCAATCCCCATTAATGGTTCACCTCGAACACCCAGAAGAGGTCAGAACAGGAGCGCTCGGATAGCAAAACAACTAGAAAATG--|ACGAGGATTATCGAGGTTCTCTGTAAAGAACACGAGTGTAATATAGATGAGGTAATTTCTCTTACACTTTATTTAAAACAGCTGAAGTAGATATATATGCTAAGTCTGCCTGTCA
Rb1	Del 3|0	0	0	0	0	0	0	0	0	0	0	0	0	0	11183	0	0	0	0	0	0	0	0	396	47	1060	706	TACAGAAACAGCTGCAATCCCCATTAATGGTTCACCTCGAACACCCAGAAGAGGTCAGAACAGGAGCGCTCGGATAGCAAAACAACTAGAAAAT---|ACGAGGATTATCGAGGTTCTCTGTAAAGAACACGAGTGTAATATAGATGAGGTAATTTCTCTTACACTTTATTTAAAACAGCTGAAGTAGATATATATGCTAAGTCTGCCTGTCA
Rb1	Del 13|0	0	0	0	0	0	0	0	0	0	0	0	0	0	0	9861	0	0	0	0	0	0	0	0	0	0	0	TACAGAAACAGCTGCAATCCCCATTAATGGTTCACCTCGAACACCCAGAAGAGGTCAGAACAGGAGCGCTCGGATAGCAAAAC-------------T|ACGAGGATTATCGAGGTTCTCTGTAAAGAACACGAGTGTAATATAGATGAGGTAATTTCTCTTACACTTTATTTAAAACAGCTGAAGTAGATATATATGCTAAGTCTGCCTGTCA
Rb1	Del 2|1	0	0	0	0	0	0	0	0	0	0	0	0	0	0	7362	0	0	0	0	0	0	0	0	0	0	0	TACAGAAACAGCTGCAATCCCCATTAATGGTTCACCTCGAACACCCAGAAGAGGTCAGAACAGGAGCGCTCGGATAGCAAAACAACTAGAAAATG--|-CGAGGATTATCGAGGTTCTCTGTAAAGAACACGAGTGTAATATAGATGAGGTAATTTCTCTTACACTTTATTTAAAACAGCTGAAGTAGATATATATGCTAAGTCTGCCTGTCA
Rb1	Del 0|9	0	0	0	0	0	0	0	0	0	0	0	0	0	0	0	22436	0	0	0	0	0	0	0	0	0	0	TACAGAAACAGCTGCAATCCCCATTAATGGTTCACCTCGAACACCCAGAAGAGGTCAGAACAGGAGCGCTCGGATAGCAAAACAACTAGAAAATGAT|---------ATCGAGGTTCTCTGTAAAGAACACGAGTGTAATATAGATGAGGTAATTTCTCTTACACTTTATTTAAAACAGCTGAAGTAGATATATATGCTAAGTCTGCCTGTCA
Rb1	Del 6|0	0	0	0	0	0	0	0	0	0	0	0	0	0	0	0	21878	0	0	0	0	0	0	0	0	0	0	TACAGAAACAGCTGCAATCCCCATTAATGGTTCACCTCGAACACCCAGAAGAGGTCAGAACAGGAGCGCTCGGATAGCAAAACAACTAGAA------|ACGAGGATTATCGAGGTTCTCTGTAAAGAACACGAGTGTAATATAGATGAGGTAATTTCTCTTACACTTTATTTAAAACAGCTGAAGTAGATATATATGCTAAGTCTGCCTGTCA
Rb1	Del 16|27	0	0	0	0	0	0	0	0	0	0	0	0	0	0	0	0	0	7216	0	0	0	0	0	0	0	0	TACAGAAACAGCTGCAATCCCCATTAATGGTTCACCTCGAACACCCAGAAGAGGTCAGAACAGGAGCGCTCGGATAGCAAA----------------|---------------------------GAACACGAGTGTAATATAGATGAGGTAATTTCTCTTACACTTTATTTAAAACAGCTGAAGTAGATATATATGCTAAGTCTGCCTGTCA
Rb1	Del 4|0 Ins 2GT	0	0	0	0	0	0	0	0	0	0	0	0	0	0	0	0	0	0	7409	0	0	0	0	0	0	0	TACAGAAACAGCTGCAATCCCCATTAATGGTTCACCTCGAACACCCAGAAGAGGTCAGAACAGGAGCGCTCGGATAGCAAAACAACTAGAAAA----{GT}|ACGAGGATTATCGAGGTTCTCTGTAAAGAACACGAGTGTAATATAGATGAGGTAATTTCTCTTACACTTTATTTAAAACAGCTGAAGTAGATATATATGCTAAGTCTGCCTGTCA
Rb1	Del 9|0	0	0	0	0	0	0	0	0	0	0	0	0	0	0	0	0	0	0	0	0	7690	0	0	0	0	0	TACAGAAACAGCTGCAATCCCCATTAATGGTTCACCTCGAACACCCAGAAGAGGTCAGAACAGGAGCGCTCGGATAGCAAAACAACT---------T|ACGAGGATTATCGAGGTTCTCTGTAAAGAACACGAGTGTAATATAGATGAGGTAATTTCTCTTACACTTTATTTAAAACAGCTGAAGTAGATATATATGCTAAGTCTGCCTGTCA
Rps6ka3	WT	33963	19744	13907	24523	21348	25438	19453	27919	30560	21101	26048	26186	27028	27928	31906	27293	33708	25004	25774	5431	10177	13715	6745	4367	10195	11393	GAGAGTCATTCTGGGCTAACAATGGGTTGTCTCTATATTTACCTTAACAGGAAGAAGGCAGTATCAAAGAAATTGCAATCACACATCATGTGAAGGAAGGACATG|AAAAGGCAGATCCTTCCCAGTTTGAACTTTTAAAAGTATTAGGGCAGGGATCATTTGGAAAGGTAAGTCATAGTTGTTTGC
Rps6ka3	Del 1|0	0	0	13697	0	0	0	0	0	0	0	0	0	0	0	0	0	0	0	0	0	0	0	0	0	0	0	GAGAGTCATTCTGGGCTAACAATGGGTTGTCTCTATATTTACCTTAACAGGAAGAAGGCAGTATCAAAGAAATTGCAATCACACATCATGTGAAGGAAGGACAT-|AAAAGGCAGATCCTTCCCAGTTTGAACTTTTAAAAGTATTAGGGCAGGGATCATTTGGAAAGGTAAGTCATAGTTGTTTGC
Rps6ka3	Del 0|2	0	0	0	0	0	0	8063	0	0	0	0	0	0	0	0	0	0	0	0	0	0	8473	0	0	0	0	GAGAGTCATTCTGGGCTAACAATGGGTTGTCTCTATATTTACCTTAACAGGAAGAAGGCAGTATCAAAGAAATTGCAATCACACATCATGTGAAGGAAGGACATG|--AAGGCAGATCCTTCCCAGTTTGAACTTTTAAAAGTATTAGGGCAGGGATCATTTGGAAAGGTAAGTCATAGTTGTTTGC
Rps6ka3	Del 14|30	0	0	0	0	0	0	0	0	0	0	0	0	0	0	0	0	0	0	0	0	4075	0	0	0	0	0	GAGAGTCATTCTGGGCTAACAATGGGTTGTCTCTATATTTACCTTAACAGGAAGAAGGCAGTATCAAAGAAATTGCAATCACACATCATGT--------------|------------------------------TAAAAGTATTAGGGCAGGGATCATTTGGAAAGGTAAGTCATAGTTGTTTGC
Runx3	WT	1052	4522	1574	1584	2973	8271	1802	2124	2044	2011	3469	2183	1849	3065	2336	695	3623	3185	1775	8890	1700	7928	57844	75537	31282	20590	GACAGCCCCAACTTCCTCTGCTCCGTGCTGCCCTCGCACTGGCGCTGCAACAAGACGCTGCCGGTCGCCT|TCAAGGTGAGTGCAGGGGCCCGAGCCGGGAGGACACCGGGGAACCTGGGCGCCCCCATTTGCAGGAGCCCATACCGGGGAGGACTTGGGGAGCACCTAGAAGTAGGACATGAAAGGGGATGTCACCCAG
Runx3	Del 16|10	910	0	0	0	0	0	0	0	0	0	0	0	0	0	0	0	0	0	0	0	0	0	0	0	0	0	GACAGCCCCAACTTCCTCTGCTCCGTGCTGCCCTCGCACTGGCGCTGCAACAAG----------------|----------TGCAGGGGCCCGAGCCGGGAGGACACCGGGGAACCTGGGCGCCCCCATTTGCAGGAGCCCATACCGGGGAGGACTTGGGGAGCACCTAGAAGTAGGACATGAAAGGGGATGTCACCCAG
Runx3	Del 13|6	114	0	0	0	0	0	0	0	0	0	0	0	0	0	0	0	0	0	0	0	0	0	0	0	0	0	GACAGCCCCAACTTCCTCTGCTCCGTGCTGCCCTCGCACTGGCGCTGCAACAAGACG-------------|------TGAGTGCAGGGGCCCGAGCCGGGAGGACACCGGGGAACCTGGGCGCCCCCATTTGCAGGAGCCCATACCGGGGAGGACTTGGGGAGCACCTAGAAGTAGGACATGAAAGGGGATGTCACCCAG
Runx3	Del 1|0	0	703	0	0	0	0	0	0	0	0	0	0	0	0	0	0	0	0	0	0	0	0	0	0	0	0	GACAGCCCCAACTTCCTCTGCTCCGTGCTGCCCTCGCACTGGCGCTGCAACAAGACGCTGCCGGTCGC-T|TCAAGGTGAGTGCAGGGGCCCGAGCCGGGAGGACACCGGGGAACCTGGGCGCCCCCATTTGCAGGAGCCCATACCGGGGAGGACTTGGGGAGCACCTAGAAGTAGGACATGAAAGGGGATGTCACCCAG
Runx3	Del 2|0	0	460	0	0	0	0	0	0	0	0	0	0	0	0	0	0	0	0	0	0	0	0	0	0	0	0	GACAGCCCCAACTTCCTCTGCTCCGTGCTGCCCTCGCACTGGCGCTGCAACAAGACGCTGCCGGTCGC--|TCAAGGTGAGTGCAGGGGCCCGAGCCGGGAGGACACCGGGGAACCTGGGCGCCCCCATTTGCAGGAGCCCATACCGGGGAGGACTTGGGGAGCACCTAGAAGTAGGACATGAAAGGGGATGTCACCCAG
Runx3	Del 2|0	0	436	0	0	0	0	0	0	0	0	0	0	0	0	0	0	0	0	0	0	0	0	0	0	0	0	GACAGCCCCAACTTCCTCTGCTCCGTGCTGCCCTCGCACTGGCGCTGCAACAAGACGCTGCCGGTCG--T|TCAAGGTGAGTGCAGGGGCCCGAGCCGGGAGGACACCGGGGAACCTGGGCGCCCCCATTTGCAGGAGCCCATACCGGGGAGGACTTGGGGAGCACCTAGAAGTAGGACATGAAAGGGGATGTCACCCAG
Runx3	Del 1|0	0	0	1660	0	230	0	0	0	1871	2343	0	0	0	669	967	1035	0	0	116	0	204	0	0	0	0	0	GACAGCCCCAACTTCCTCTGCTCCGTGCTGCCCTCGCACTGGCGCTGCAACAAGACGCTGCCGGTCGCC-|TCAAGGTGAGTGCAGGGGCCCGAGCCGGGAGGACACCGGGGAACCTGGGCGCCCCCATTTGCAGGAGCCCATACCGGGGAGGACTTGGGGAGCACCTAGAAGTAGGACATGAAAGGGGATGTCACCCAG
Runx3	Del 12|19	0	0	0	5316	0	0	0	0	0	0	0	0	0	0	0	0	0	0	0	0	0	0	0	0	0	0	GACAGCCCCAACTTCCTCTGCTCCGTGCTGCCCTCGCACTGGCGCTGCAACAAGACGC------------|-------------------CCGAGCCGGGAGGACACCGGGGAACCTGGGCGCCCCCATTTGCAGGAGCCCATACCGGGGAGGACTTGGGGAGCACCTAGAAGTAGGACATGAAAGGGGATGTCACCCAG
Runx3	Del 7|0	0	0	0	4462	0	0	0	350	0	0	0	0	0	0	0	1025	0	0	0	0	0	0	0	0	0	0	GACAGCCCCAACTTCCTCTGCTCCGTGCTGCCCTCGCACTGGCGCTGCAACAAGACGCTGCCG-------|TCAAGGTGAGTGCAGGGGCCCGAGCCGGGAGGACACCGGGGAACCTGGGCGCCCCCATTTGCAGGAGCCCATACCGGGGAGGACTTGGGGAGCACCTAGAAGTAGGACATGAAAGGGGATGTCACCCAG
Runx3	Del 6|5	0	0	0	0	305	0	0	0	0	0	0	0	0	0	0	0	0	0	0	0	0	0	0	0	0	0	GACAGCCCCAACTTCCTCTGCTCCGTGCTGCCCTCGCACTGGCGCTGCAACAAGACGCTGCCGG------ | -----GTGAGTGCAGGGGCCCGAGCCGGGAGGACACCGGGGAACCTGGGCGCCCCCATTTGCAGGAGCCCATACCGGGGAGGACTTGGGGAGCACCTAGAAGTAGGACATGAAAGGGGATGTCACCCAG
Runx3	Del 8|3	0	0	0	0	0	0	270	0	0	0	0	0	0	0	0	0	0	0	0	0	0	0	0	0	0	0	GACAGCCCCAACTTCCTCTGCTCCGTGCTGCCCTCGCACTGGCGCTGCAACAAGACGCTGCC-------- | ---AGGTGAGTGCAGGGGCCCGAGCCGGGAGGACACCGGGGAACCTGGGCGCCCCCATTTGCAGGAGCCCATACCGGGGAGGACTTGGGGAGCACCTAGAAGTAGGACATGAAAGGGGATGTCACCCAG
Runx3	Del 3|0	0	0	0	0	0	0	205	339	0	0	0	0	0	0	0	0	0	0	0	0	0	0	0	0	0	0	GACAGCCCCAACTTCCTCTGCTCCGTGCTGCCCTCGCACTGGCGCTGCAACAAGACGCTGCCGGTC---T|TCAAGGTGAGTGCAGGGGCCCGAGCCGGGAGGACACCGGGGAACCTGGGCGCCCCCATTTGCAGGAGCCCATACCGGGGAGGACTTGGGGAGCACCTAGAAGTAGGACATGAAAGGGGATGTCACCCAG
Runx3	Del 1|2	0	0	0	0	0	0	0	0	1832	2340	0	1099	0	0	0	0	0	0	236	0	0	0	0	0	0	0	GACAGCCCCAACTTCCTCTGCTCCGTGCTGCCCTCGCACTGGCGCTGCAACAAGACGCTGCCGGTCGCC-|--AAGGTGAGTGCAGGGGCCCGAGCCGGGAGGACACCGGGGAACCTGGGCGCCCCCATTTGCAGGAGCCCATACCGGGGAGGACTTGGGGAGCACCTAGAAGTAGGACATGAAAGGGGATGTCACCCAG
Runx3	Del 32|3	0	0	0	0	0	0	0	0	0	0	723	0	0	0	0	0	0	0	0	0	0	0	0	0	0	0	GACAGCCCCAACTTCCTCTGCTCCGTGCTGCCCTCGCA-------------------------------- | ---AGGTGAGTGCAGGGGCCCGAGCCGGGAGGACACCGGGGAACCTGGGCGCCCCCATTTGCAGGAGCCCATACCGGGGAGGACTTGGGGAGCACCTAGAAGTAGGACATGAAAGGGGATGTCACCCAG
Runx3	Del 42|14	0	0	0	0	0	0	0	0	0	0	0	0	0	0	0	0	0	0	0	0	466	0	0	0	0	0	GACAGCCCCAACTTCCTCTGCTCCGTGC------------------------------------------ | --------------GGGGCCCGAGCCGGGAGGACACCGGGGAACCTGGGCGCCCCCATTTGCAGGAGCCCATACCGGGGAGGACTTGGGGAGCACCTAGAAGTAGGACATGAAAGGGGATGTCACCCAG
Runx3	Del 9|2	0	0	0	0	0	0	0	0	0	0	0	0	0	0	0	0	0	0	0	0	282	0	0	0	0	0	GACAGCCCCAACTTCCTCTGCTCCGTGCTGCCCTCGCACTGGCGCTGCAACAAGACGCTGC---------|--AAGGTGAGTGCAGGGGCCCGAGCCGGGAGGACACCGGGGAACCTGGGCGCCCCCATTTGCAGGAGCCCATACCGGGGAGGACTTGGGGAGCACCTAGAAGTAGGACATGAAAGGGGATGTCACCCAG
Runx3	Del 0|3	0	0	0	0	0	0	0	0	0	0	0	0	0	0	0	0	0	0	0	0	281	0	0	0	0	0	GACAGCCCCAACTTCCTCTGCTCCGTGCTGCCCTCGCACTGGCGCTGCAACAAGACGCTGCCGGTCGCCT|---AGGTGAGTGCAGGGGCCCGAGCCGGGAGGACACCGGGGAACCTGGGCGCCCCCATTTGCAGGAGCCCATACCGGGGAGGACTTGGGGAGCACCTAGAAGTAGGACATGAAAGGGGATGTCACCCAG
Runx3	Del 6|0	0	0	0	0	0	0	0	0	0	0	0	0	0	0	0	0	0	0	0	0	0	0	8571	22861	5383	4714	GACAGCCCCAACTTCCTCTGCTCCGTGCTGCCCTCGCACTGGCGCTGCAACAAGACGCTGCCGG------|TCAAGGTGAGTGCAGGGGCCCGAGCCGGGAGGACACCGGGGAACCTGGGCGCCCCCATTTGCAGGAGCCCATACCGGGGAGGACTTGGGGAGCACCTAGAAGTAGGACATGAAAGGGGATGTCACCCAG
Setd5	WT	24693	13016	22667	12012	24443	25662	29178	27798	19682	18882	25450	9248	8072	24932	24817	19936	20082	14509	25760	20119	23977	21822	34113	55600	45437	61731	GCCCTGGTTTTAGTAGGTAATCGCTCAGAAGGAAAGTTTTAACTCCTGGGAAAGCCCCTTCTATGCTAATTTATTCTATCGGGCGCCTTTGCCTTTCTCATTCTTAGGAATAAGGATCTTTCTCCTGTG|TACTGATGCTGCAGCCCGCCCTGCTGGCCTGGGTCAGGGGTGCGTGGATGACCTGCATTTTCTGCTTTCTCATGTTACTTGTGTAACGTCTTCACC
Setd5	Del 12|2	9413	0	0	0	0	0	0	0	0	0	0	0	0	0	0	0	0	0	0	0	0	0	0	0	0	0	GCCCTGGTTTTAGTAGGTAATCGCTCAGAAGGAAAGTTTTAACTCCTGGGAAAGCCCCTTCTATGCTAATTTATTCTATCGGGCGCCTTTGCCTTTCTCATTCTTAGGAATAAGGAT------------|--CTGATGCTGCAGCCCGCCCTGCTGGCCTGGGTCAGGGGTGCGTGGATGACCTGCATTTTCTGCTTTCTCATGTTACTTGTGTAACGTCTTCACC
Setd5	Del 0|3	9401	0	0	0	0	0	0	0	0	0	0	0	0	0	5199	0	0	0	0	0	0	0	1993	1502	4380	6123	GCCCTGGTTTTAGTAGGTAATCGCTCAGAAGGAAAGTTTTAACTCCTGGGAAAGCCCCTTCTATGCTAATTTATTCTATCGGGCGCCTTTGCCTTTCTCATTCTTAGGAATAAGGATCTTTCTCCTGTG|---TGATGCTGCAGCCCGCCCTGCTGGCCTGGGTCAGGGGTGCGTGGATGACCTGCATTTTCTGCTTTCTCATGTTACTTGTGTAACGTCTTCACC
Setd5	Del 0|1	0	5069	0	12444	4212	0	0	7393	0	0	0	0	0	0	0	0	0	6163	0	0	0	11126	0	0	0	0	GCCCTGGTTTTAGTAGGTAATCGCTCAGAAGGAAAGTTTTAACTCCTGGGAAAGCCCCTTCTATGCTAATTTATTCTATCGGGCGCCTTTGCCTTTCTCATTCTTAGGAATAAGGATCTTTCTCCTGTG|-ACTGATGCTGCAGCCCGCCCTGCTGGCCTGGGTCAGGGGTGCGTGGATGACCTGCATTTTCTGCTTTCTCATGTTACTTGTGTAACGTCTTCACC
Setd5	Del 1|0	0	4331	0	0	0	0	0	0	12706	0	0	0	0	0	0	0	0	0	0	5420	0	0	0	0	0	0	GCCCTGGTTTTAGTAGGTAATCGCTCAGAAGGAAAGTTTTAACTCCTGGGAAAGCCCCTTCTATGCTAATTTATTCTATCGGGCGCCTTTGCCTTTCTCATTCTTAGGAATAAGGATCTTTCTCCTGT-|TACTGATGCTGCAGCCCGCCCTGCTGGCCTGGGTCAGGGGTGCGTGGATGACCTGCATTTTCTGCTTTCTCATGTTACTTGTGTAACGTCTTCACC
Setd5	Del 2|0	0	2190	0	0	3603	0	0	0	12855	0	0	0	15623	0	0	0	0	0	0	7400	5415	0	5243	4196	12159	17028	GCCCTGGTTTTAGTAGGTAATCGCTCAGAAGGAAAGTTTTAACTCCTGGGAAAGCCCCTTCTATGCTAATTTATTCTATCGGGCGCCTTTGCCTTTCTCATTCTTAGGAATAAGGATCTTTCTCCTG--|TACTGATGCTGCAGCCCGCCCTGCTGGCCTGGGTCAGGGGTGCGTGGATGACCTGCATTTTCTGCTTTCTCATGTTACTTGTGTAACGTCTTCACC
Setd5	Del 0|2	0	0	11434	0	0	0	0	0	0	0	0	0	0	8418	0	0	0	0	0	0	0	0	0	0	0	0	GCCCTGGTTTTAGTAGGTAATCGCTCAGAAGGAAAGTTTTAACTCCTGGGAAAGCCCCTTCTATGCTAATTTATTCTATCGGGCGCCTTTGCCTTTCTCATTCTTAGGAATAAGGATCTTTCTCCTGTG|--CTGATGCTGCAGCCCGCCCTGCTGGCCTGGGTCAGGGGTGCGTGGATGACCTGCATTTTCTGCTTTCTCATGTTACTTGTGTAACGTCTTCACC
Setd5	Del 0|5	0	0	0	11727	569	0	0	6921	0	0	10270	7870	0	0	0	0	0	0	4354	0	0	0	0	0	0	0	GCCCTGGTTTTAGTAGGTAATCGCTCAGAAGGAAAGTTTTAACTCCTGGGAAAGCCCCTTCTATGCTAATTTATTCTATCGGGCGCCTTTGCCTTTCTCATTCTTAGGAATAAGGATCTTTCTCCTGTG|-----ATGCTGCAGCCCGCCCTGCTGGCCTGGGTCAGGGGTGCGTGGATGACCTGCATTTTCTGCTTTCTCATGTTACTTGTGTAACGTCTTCACC
Setd5	Del 18|9	0	0	0	0	0	11841	0	0	0	0	0	0	0	0	0	0	0	0	0	0	0	0	0	0	0	0	GCCCTGGTTTTAGTAGGTAATCGCTCAGAAGGAAAGTTTTAACTCCTGGGAAAGCCCCTTCTATGCTAATTTATTCTATCGGGCGCCTTTGCCTTTCTCATTCTTAGGAAT------------------|---------TGCAGCCCGCCCTGCTGGCCTGGGTCAGGGGTGCGTGGATGACCTGCATTTTCTGCTTTCTCATGTTACTTGTGTAACGTCTTCACC
Setd5	Del 4|6	0	0	0	0	0	0	5082	0	0	0	0	0	0	0	0	0	0	0	0	0	0	0	0	0	0	0	GCCCTGGTTTTAGTAGGTAATCGCTCAGAAGGAAAGTTTTAACTCCTGGGAAAGCCCCTTCTATGCTAATTTATTCTATCGGGCGCCTTTGCCTTTCTCATTCTTAGGAATAAGGATCTTTCTCC----|------TGCTGCAGCCCGCCCTGCTGGCCTGGGTCAGGGGTGCGTGGATGACCTGCATTTTCTGCTTTCTCATGTTACTTGTGTAACGTCTTCACC
Setd5	Del 71|45	0	0	0	0	0	0	2396	0	0	0	0	0	0	0	0	0	0	0	0	0	0	0	0	0	0	0	GCCCTGGTTTTAGTAGGTAATCGCTCAGAAGGAAAGTTTTAACTCCTGGGAAAGCCCC-----------------------------------------------------------------------|---------------------------------------------GGATGACCTGCATTTTCTGCTTTCTCATGTTACTTGTGTAACGTCTTCACC
Setd5	Del 0|11	0	0	0	0	0	0	0	0	0	10320	0	0	0	0	0	0	0	0	0	0	0	0	0	0	0	0	GCCCTGGTTTTAGTAGGTAATCGCTCAGAAGGAAAGTTTTAACTCCTGGGAAAGCCCCTTCTATGCTAATTTATTCTATCGGGCGCCTTTGCCTTTCTCATTCTTAGGAATAAGGATCTTTCTCCTGTG|-----------CAGCCCGCCCTGCTGGCCTGGGTCAGGGGTGCGTGGATGACCTGCATTTTCTGCTTTCTCATGTTACTTGTGTAACGTCTTCACC
Setd5	Del 0|1	0	0	0	0	0	0	0	0	0	10202	0	0	0	0	0	0	0	0	0	0	0	0	0	0	0	0	GCCCTGGTTTTAGTAGGTAATCGCTCAGAAGGAAAGTTTTAACTCCTGGGAAAGCCCCTTCTATGCTAATTTATTCTATCGGGCGCCTTTGCCTTTCTCATTCTTAGGAATAAGGATCTTTCTCCTGTG|-ACTGATGCTGCAGCCCGCCCTGCTGGCCTGGGTCAGGGGTGCGTGGATGACCTGCATTTTCTGCTTTCTCATGTTACTTGTGTAACGTCTTCACC
Setd5	Del 0|8	0	0	0	0	0	0	0	0	0	0	0	8119	0	8571	0	0	0	0	0	0	0	0	0	0	0	0	GCCCTGGTTTTAGTAGGTAATCGCTCAGAAGGAAAGTTTTAACTCCTGGGAAAGCCCCTTCTATGCTAATTTATTCTATCGGGCGCCTTTGCCTTTCTCATTCTTAGGAATAAGGATCTTTCTCCTGTG|--------CTGCAGCCCGCCCTGCTGGCCTGGGTCAGGGGTGCGTGGATGACCTGCATTTTCTGCTTTCTCATGTTACTTGTGTAACGTCTTCACC
Setd5	Del 5|2	0	0	0	0	0	0	0	0	0	0	0	0	15421	0	0	0	0	0	0	0	0	0	0	0	0	0	GCCCTGGTTTTAGTAGGTAATCGCTCAGAAGGAAAGTTTTAACTCCTGGGAAAGCCCCTTCTATGCTAATTTATTCTATCGGGCGCCTTTGCCTTTCTCATTCTTAGGAATAAGGATCTTTCTC-----|--CTGATGCTGCAGCCCGCCCTGCTGGCCTGGGTCAGGGGTGCGTGGATGACCTGCATTTTCTGCTTTCTCATGTTACTTGTGTAACGTCTTCACC
Setd5	Del 81|3	0	0	0	0	0	0	0	0	0	0	0	0	0	0	9278	0	0	0	0	0	0	0	0	0	0	0	GCCCTGGTTTTAGTAGGTAATCGCTCAGAAGGAAAGTTTTAACTCCTG---------------------------------------------------------------------------------|---TGATGCTGCAGCCCGCCCTGCTGGCCTGGGTCAGGGGTGCGTGGATGACCTGCATTTTCTGCTTTCTCATGTTACTTGTGTAACGTCTTCACC
Setd5	Del 12|11	0	0	0	0	0	0	0	0	0	0	0	0	0	0	0	19171	0	0	0	0	0	0	0	0	0	0	GCCCTGGTTTTAGTAGGTAATCGCTCAGAAGGAAAGTTTTAACTCCTGGGAAAGCCCCTTCTATGCTAATTTATTCTATCGGGCGCCTTTGCCTTTCTCATTCTTAGGAATAAGGAT------------|-----------CAGCCCGCCCTGCTGGCCTGGGTCAGGGGTGCGTGGATGACCTGCATTTTCTGCTTTCTCATGTTACTTGTGTAACGTCTTCACC
Setd5	Del 4|2	0	0	0	0	0	0	0	0	0	0	0	0	0	0	0	0	27994	0	0	0	0	0	0	0	0	0	GCCCTGGTTTTAGTAGGTAATCGCTCAGAAGGAAAGTTTTAACTCCTGGGAAAGCCCCTTCTATGCTAATTTATTCTATCGGGCGCCTTTGCCTTTCTCATTCTTAGGAATAAGGATCTTTCTCC----|--CTGATGCTGCAGCCCGCCCTGCTGGCCTGGGTCAGGGGTGCGTGGATGACCTGCATTTTCTGCTTTCTCATGTTACTTGTGTAACGTCTTCACC
Setd5	Del 0|4	0	0	0	0	0	0	0	0	0	0	0	0	0	0	0	0	0	6029	0	0	0	0	0	0	0	0	GCCCTGGTTTTAGTAGGTAATCGCTCAGAAGGAAAGTTTTAACTCCTGGGAAAGCCCCTTCTATGCTAATTTATTCTATCGGGCGCCTTTGCCTTTCTCATTCTTAGGAATAAGGATCTTTCTCCTGTG|----GATGCTGCAGCCCGCCCTGCTGGCCTGGGTCAGGGGTGCGTGGATGACCTGCATTTTCTGCTTTCTCATGTTACTTGTGTAACGTCTTCACC
Setd5	Del 8|8	0	0	0	0	0	0	0	0	0	0	0	0	0	0	0	0	0	0	3428	0	0	0	0	0	0	0	GCCCTGGTTTTAGTAGGTAATCGCTCAGAAGGAAAGTTTTAACTCCTGGGAAAGCCCCTTCTATGCTAATTTATTCTATCGGGCGCCTTTGCCTTTCTCATTCTTAGGAATAAGGATCTTT--------|--------CTGCAGCCCGCCCTGCTGGCCTGGGTCAGGGGTGCGTGGATGACCTGCATTTTCTGCTTTCTCATGTTACTTGTGTAACGTCTTCACC
Setd5	Del 2|7	0	0	0	0	0	0	0	0	0	0	0	0	0	0	0	0	0	0	0	0	5087	0	0	0	0	0	GCCCTGGTTTTAGTAGGTAATCGCTCAGAAGGAAAGTTTTAACTCCTGGGAAAGCCCCTTCTATGCTAATTTATTCTATCGGGCGCCTTTGCCTTTCTCATTCTTAGGAATAAGGATCTTTCTCCTG--|-------GCTGCAGCCCGCCCTGCTGGCCTGGGTCAGGGGTGCGTGGATGACCTGCATTTTCTGCTTTCTCATGTTACTTGTGTAACGTCTTCACC
Smad4	WT	16362	32964	28984	14102	44493	24197	36657	8778	11477	20570	23184	36852	37950	16854	19825	8713	9316	55935	40164	26862	32642	51773	71824	44270	46196	81106	AGTACGTTCACGACTTTGAAGGACAGCCGTCCTTACCCACTGAAGGACATTCGATTCAAACCATCCAACACCCGCCAAGTAATCGCGCATCAACGGAGACGTACAGCG|CCCCGGCTCTGTTAGCCCCGGCAGAGTCTAACGCCACCAGCACCACCAACTTCCCCAACATTCCTGTGGCTTCCACAAGTGAGTGTTGCAGTCAGATCGAGTCGAAAGTTTTC
Smad4	Del 2|0	64016	12839	0	0	6726	0	9112	8739	0	10265	5095	3203	2509	5126	1527	13400	0	0	8216	0	2945	0	27643	7972	14254	33920	AGTACGTTCACGACTTTGAAGGACAGCCGTCCTTACCCACTGAAGGACATTCGATTCAAACCATCCAACACCCGCCAAGTAATCGCGCATCAACGGAGACGTACAG--|CCCCGGCTCTGTTAGCCCCGGCAGAGTCTAACGCCACCAGCACCACCAACTTCCCCAACATTCCTGTGGCTTCCACAAGTGAGTGTTGCAGTCAGATCGAGTCGAAAGTTTTC
Smad4	Del 20|18	7484	0	0	0	0	0	0	0	0	0	0	0	0	0	0	0	0	0	0	0	0	0	0	0	0	0	AGTACGTTCACGACTTTGAAGGACAGCCGTCCTTACCCACTGAAGGACATTCGATTCAAACCATCCAACACCCGCCAAGTAATCGCGC--------------------|------------------CGGCAGAGTCTAACGCCACCAGCACCACCAACTTCCCCAACATTCCTGTGGCTTCCACAAGTGAGTGTTGCAGTCAGATCGAGTCGAAAGTTTTC
Smad4	Del 22|34	0	9014	0	0	0	0	0	0	0	0	0	0	0	0	0	0	0	0	0	0	0	0	0	0	0	0	AGTACGTTCACGACTTTGAAGGACAGCCGTCCTTACCCACTGAAGGACATTCGATTCAAACCATCCAACACCCGCCAAGTAATCGC----------------------|----------------------------------CACCAGCACCACCAACTTCCCCAACATTCCTGTGGCTTCCACAAGTGAGTGTTGCAGTCAGATCGAGTCGAAAGTTTTC
Smad4	Del 38|0	0	0	19309	0	0	0	0	0	0	0	0	0	0	0	0	0	0	0	0	0	0	0	0	0	0	0	AGTACGTTCACGACTTTGAAGGACAGCCGTCCTTACCCACTGAAGGACATTCGATTCAAACCATCCAACA--------------------------------------|CCCCGGCTCTGTTAGCCCCGGCAGAGTCTAACGCCACCAGCACCACCAACTTCCCCAACATTCCTGTGGCTTCCACAAGTGAGTGTTGCAGTCAGATCGAGTCGAAAGTTTTC
Smad4	Del 0|3	0	0	0	21276	0	0	0	1784	0	0	0	0	0	0	0	0	0	0	0	0	0	0	0	0	0	0	AGTACGTTCACGACTTTGAAGGACAGCCGTCCTTACCCACTGAAGGACATTCGATTCAAACCATCCAACACCCGCCAAGTAATCGCGCATCAACGGAGACGTACAGCG|---CGGCTCTGTTAGCCCCGGCAGAGTCTAACGCCACCAGCACCACCAACTTCCCCAACATTCCTGTGGCTTCCACAAGTGAGTGTTGCAGTCAGATCGAGTCGAAAGTTTTC
Smad4	Del 4|0	0	0	0	18152	0	0	0	0	0	0	0	0	0	0	0	0	0	0	0	9268	0	0	0	0	0	0	AGTACGTTCACGACTTTGAAGGACAGCCGTCCTTACCCACTGAAGGACATTCGATTCAAACCATCCAACACCCGCCAAGTAATCGCGCATCAACGGAGACGTAC----|CCCCGGCTCTGTTAGCCCCGGCAGAGTCTAACGCCACCAGCACCACCAACTTCCCCAACATTCCTGTGGCTTCCACAAGTGAGTGTTGCAGTCAGATCGAGTCGAAAGTTTTC
Smad4	Del 4|3	0	0	0	0	7029	0	0	0	0	0	0	0	0	0	0	0	0	0	0	0	0	0	0	0	0	0	AGTACGTTCACGACTTTGAAGGACAGCCGTCCTTACCCACTGAAGGACATTCGATTCAAACCATCCAACACCCGCCAAGTAATCGCGCATCAACGGAGACGTAC----|---CGGCTCTGTTAGCCCCGGCAGAGTCTAACGCCACCAGCACCACCAACTTCCCCAACATTCCTGTGGCTTCCACAAGTGAGTGTTGCAGTCAGATCGAGTCGAAAGTTTTC
Smad4	Del 5|0 Ins 1A	0	0	0	0	0	14080	0	0	0	0	0	0	0	0	0	0	0	0	0	0	0	0	0	0	0	0	AGTACGTTCACGACTTTGAAGGACAGCCGTCCTTACCCACTGAAGGACATTCGATTCAAACCATCCAACACCCGCCAAGTAATCGCGCATCAACGGAGACGTA-----{A}|CCCCGGCTCTGTTAGCCCCGGCAGAGTCTAACGCCACCAGCACCACCAACTTCCCCAACATTCCTGTGGCTTCCACAAGTGAGTGTTGCAGTCAGATCGAGTCGAAAGTTTTC
Smad4	Del 5|0 (D6 I1G)	0	0	0	0	0	12854	0	0	0	0	0	0	0	0	0	0	0	0	0	0	0	0	0	0	0	0	AGTACGTTCACGACTTTGAAGGACAGCCGTCCTTACCCACTGAAGGACATTCGATTCAAACCATCCAACACCCGCCAAGTAATCGCGCATCAACGGAGACGT-----G|CCCCGGCTCTGTTAGCCCCGGCAGAGTCTAACGCCACCAGCACCACCAACTTCCCCAACATTCCTGTGGCTTCCACAAGTGAGTGTTGCAGTCAGATCGAGTCGAAAGTTTTC
Smad4	Del 5|0	0	0	0	0	0	0	0	1446	0	0	0	0	0	0	5012	12254	0	0	0	0	8375	0	0	0	0	0	AGTACGTTCACGACTTTGAAGGACAGCCGTCCTTACCCACTGAAGGACATTCGATTCAAACCATCCAACACCCGCCAAGTAATCGCGCATCAACGGAGACGTA-----|CCCCGGCTCTGTTAGCCCCGGCAGAGTCTAACGCCACCAGCACCACCAACTTCCCCAACATTCCTGTGGCTTCCACAAGTGAGTGTTGCAGTCAGATCGAGTCGAAAGTTTTC
Smad4	Del 1|0	0	0	0	0	0	0	0	0	9534	11478	0	0	0	0	4527	0	0	0	0	0	0	0	16082	8597	13549	18064	AGTACGTTCACGACTTTGAAGGACAGCCGTCCTTACCCACTGAAGGACATTCGATTCAAACCATCCAACACCCGCCAAGTAATCGCGCATCAACGGAGACGTACAGC-|CCCCGGCTCTGTTAGCCCCGGCAGAGTCTAACGCCACCAGCACCACCAACTTCCCCAACATTCCTGTGGCTTCCACAAGTGAGTGTTGCAGTCAGATCGAGTCGAAAGTTTTC
Smad4	Del 6|1	0	0	0	0	0	0	0	0	7568	0	0	0	0	0	0	0	0	0	0	0	0	0	0	0	0	0	AGTACGTTCACGACTTTGAAGGACAGCCGTCCTTACCCACTGAAGGACATTCGATTCAAACCATCCAACACCCGCCAAGTAATCGCGCATCAACGGAGACGT------|-CCCGGCTCTGTTAGCCCCGGCAGAGTCTAACGCCACCAGCACCACCAACTTCCCCAACATTCCTGTGGCTTCCACAAGTGAGTGTTGCAGTCAGATCGAGTCGAAAGTTTTC
Smad4	Del 1|7	0	0	0	0	0	0	0	0	0	0	0	0	0	5284	0	0	0	0	0	0	0	0	0	0	0	0	AGTACGTTCACGACTTTGAAGGACAGCCGTCCTTACCCACTGAAGGACATTCGATTCAAACCATCCAACACCCGCCAAGTAATCGCGCATCAACGGAGACGTACAGC-|-------TCTGTTAGCCCCGGCAGAGTCTAACGCCACCAGCACCACCAACTTCCCCAACATTCCTGTGGCTTCCACAAGTGAGTGTTGCAGTCAGATCGAGTCGAAAGTTTTC
Smad4	Del 0|1	0	0	0	0	0	0	0	0	0	0	0	0	0	1992	0	0	0	0	0	0	0	0	0	0	0	0	AGTACGTTCACGACTTTGAAGGACAGCCGTCCTTACCCACTGAAGGACATTCGATTCAAACCATCCAACACCCGCCAAGTAATCGCGCATCAACGGAGACGTACAGCG|-CCCGGCTCTGTTAGCCCCGGCAGAGTCTAACGCCACCAGCACCACCAACTTCCCCAACATTCCTGTGGCTTCCACAAGTGAGTGTTGCAGTCAGATCGAGTCGAAAGTTTTC
Smad4	Del 3|76	0	0	0	0	0	0	0	0	0	0	0	0	0	0	0	0	16627	0	0	0	0	0	0	0	0	0	AGTACGTTCACGACTTTGAAGGACAGCCGTCCTTACCCACTGAAGGACATTCGATTCAAACCATCCAACACCCGCCAAGTAATCGCGCATCAACGGAGACGTACA---|----------------------------------------------------------------------------AAGTGAGTGTTGCAGTCAGATCGAGTCGAAAGTTTTC
Smad4	Del 0|5	0	0	0	0	0	0	0	0	0	0	0	0	0	0	0	0	13615	0	0	0	0	0	0	0	0	0	AGTACGTTCACGACTTTGAAGGACAGCCGTCCTTACCCACTGAAGGACATTCGATTCAAACCATCCAACACCCGCCAAGTAATCGCGCATCAACGGAGACGTACAGCG|-----GCTCTGTTAGCCCCGGCAGAGTCTAACGCCACCAGCACCACCAACTTCCCCAACATTCCTGTGGCTTCCACAAGTGAGTGTTGCAGTCAGATCGAGTCGAAAGTTTTC
Smad4	Del 9|0	0	0	0	0	0	0	0	0	0	0	0	0	0	0	0	0	0	0	8287	0	0	0	0	0	0	0	AGTACGTTCACGACTTTGAAGGACAGCCGTCCTTACCCACTGAAGGACATTCGATTCAAACCATCCAACACCCGCCAAGTAATCGCGCATCAACGGAGA---------|CCCCGGCTCTGTTAGCCCCGGCAGAGTCTAACGCCACCAGCACCACCAACTTCCCCAACATTCCTGTGGCTTCCACAAGTGAGTGTTGCAGTCAGATCGAGTCGAAAGTTTTC
Smad4	Del 0|2	0	0	0	0	0	0	0	0	0	0	0	0	0	0	0	0	0	0	0	9455	0	0	0	0	0	0	AGTACGTTCACGACTTTGAAGGACAGCCGTCCTTACCCACTGAAGGACATTCGATTCAAACCATCCAACACCCGCCAAGTAATCGCGCATCAACGGAGACGTACAGCG|--CCGGCTCTGTTAGCCCCGGCAGAGTCTAACGCCACCAGCACCACCAACTTCCCCAACATTCCTGTGGCTTCCACAAGTGAGTGTTGCAGTCAGATCGAGTCGAAAGTTTTC
Smad4	Del 20|34	0	0	0	0	0	0	0	0	0	0	0	0	0	0	0	0	0	0	0	4595	0	0	0	0	0	0	AGTACGTTCACGACTTTGAAGGACAGCCGTCCTTACCCACTGAAGGACATTCGATTCAAACCATCCAACACCCGCCAAGTAATCGCGC--------------------|----------------------------------CACCAGCACCACCAACTTCCCCAACATTCCTGTGGCTTCCACAAGTGAGTGTTGCAGTCAGATCGAGTCGAAAGTTTTC
Smad4	Del 25|0	0	0	0	0	0	0	0	0	0	0	0	0	0	0	0	0	0	0	0	0	8074	0	0	0	0	0	AGTACGTTCACGACTTTGAAGGACAGCCGTCCTTACCCACTGAAGGACATTCGATTCAAACCATCCAACACCCGCCAAGTAAT-------------------------|CCCCGGCTCTGTTAGCCCCGGCAGAGTCTAACGCCACCAGCACCACCAACTTCCCCAACATTCCTGTGGCTTCCACAAGTGAGTGTTGCAGTCAGATCGAGTCGAAAGTTTTC
Smad4	Del 3|0	0	0	0	0	0	0	0	0	0	0	0	0	0	0	0	0	0	0	0	0	0	0	16036	7242	11767	15348	AGTACGTTCACGACTTTGAAGGACAGCCGTCCTTACCCACTGAAGGACATTCGATTCAAACCATCCAACACCCGCCAAGTAATCGCGCATCAACGGAGACGTACA---|CCCCGGCTCTGTTAGCCCCGGCAGAGTCTAACGCCACCAGCACCACCAACTTCCCCAACATTCCTGTGGCTTCCACAAGTGAGTGTTGCAGTCAGATCGAGTCGAAAGTTTTC
Smad4	Ins 1 C	0	0	0	0	0	0	0	0	0	0	0	0	0	0	0	0	0	0	0	0	0	0	15919	8451	13018	18173	AGTACGTTCACGACTTTGAAGGACAGCCGTCCTTACCCACTGAAGGACATTCGATTCAAACCATCCAACACCCGCCAAGTAATCGCGCATCAACGGAGACGTACAGCG{C}|CCCCGGCTCTGTTAGCCCCGGCAGAGTCTAACGCCACCAGCACCACCAACTTCCCCAACATTCCTGTGGCTTCCACAAGTGAGTGTTGCAGTCAGATCGAGTCGAAAGTTTTC
Tet2	WT	8633	13280	13459	6514	14599	12965	21060	17664	10139	10405	17221	11419	3853	16102	19354	6428	9167	21451	17537	23071	15127	18602	27691	23483	52786	31993	CACCGTCACAATCACTTCTTGCTCCCCGTCTTGTTCTTCAGCCTCCTTTAGAAGGAAAAGGCGCTCTAAATGATGTAGCTTTGGAAGAACACCATGACTACCCCAAC|CGAAGCAACCGAACTCTTTTAAGGGAAGGGAAAATAGACCATCAACCCAAGACATCATCTAGCCAGAGTCTGAATCCATCTGTACATACACCCAACCCCCCCTTGATGCTTCCAGAACAGCAT
Tet2	Del 1|0	16260	3611	0	8193	1973	0	3026	8887	7695	5312	3847	0	11864	9672	4742	0	0	0	0	0	5247	0	365	357	1200	459	CACCGTCACAATCACTTCTTGCTCCCCGTCTTGTTCTTCAGCCTCCTTTAGAAGGAAAAGGCGCTCTAAATGATGTAGCTTTGGAAGAACACCATGACTACCCCAA-|CGAAGCAACCGAACTCTTTTAAGGGAAGGGAAAATAGACCATCAACCCAAGACATCATCTAGCCAGAGTCTGAATCCATCTGTACATACACCCAACCCCCCCTTGATGCTTCCAGAACAGCAT
Tet2	Del 0|2	0	3339	0	0	0	0	0	0	0	0	0	0	0	0	0	0	0	0	0	0	0	0	0	0	0	0	CACCGTCACAATCACTTCTTGCTCCCCGTCTTGTTCTTCAGCCTCCTTTAGAAGGAAAAGGCGCTCTAAATGATGTAGCTTTGGAAGAACACCATGACTACCCCAAC|--AAGCAACCGAACTCTTTTAAGGGAAGGGAAAATAGACCATCAACCCAAGACATCATCTAGCCAGAGTCTGAATCCATCTGTACATACACCCAACCCCCCCTTGATGCTTCCAGAACAGCAT
Tet2	Del 0|6	0	0	3702	0	0	0	0	0	0	0	0	0	0	0	0	0	0	0	0	0	0	0	145	82	1961	659	CACCGTCACAATCACTTCTTGCTCCCCGTCTTGTTCTTCAGCCTCCTTTAGAAGGAAAAGGCGCTCTAAATGATGTAGCTTTGGAAGAACACCATGACTACCCCAAC|------AACCGAACTCTTTTAAGGGAAGGGAAAATAGACCATCAACCCAAGACATCATCTAGCCAGAGTCTGAATCCATCTGTACATACACCCAACCCCCCCTTGATGCTTCCAGAACAGCAT
Tet2	Del 13|49	0	0	1507	0	0	0	0	0	0	0	0	0	0	0	0	0	0	0	0	0	0	0	0	0	0	0	CACCGTCACAATCACTTCTTGCTCCCCGTCTTGTTCTTCAGCCTCCTTTAGAAGGAAAAGGCGCTCTAAATGATGTAGCTTTGGAAGAACACCA-------------|-------------------------------------------------AGACATCATCTAGCCAGAGTCTGAATCCATCTGTACATACACCCAACCCCCCCTTGATGCTTCCAGAACAGCAT
Tet2	Del 2|4	0	0	0	5134	0	0	0	0	0	0	0	0	0	0	0	0	0	0	0	0	0	0	0	0	0	0	CACCGTCACAATCACTTCTTGCTCCCCGTCTTGTTCTTCAGCCTCCTTTAGAAGGAAAAGGCGCTCTAAATGATGTAGCTTTGGAAGAACACCATGACTACCCCA--|----GCAACCGAACTCTTTTAAGGGAAGGGAAAATAGACCATCAACCCAAGACATCATCTAGCCAGAGTCTGAATCCATCTGTACATACACCCAACCCCCCCTTGATGCTTCCAGAACAGCAT
Tet2	Del 0|5	0	0	0	0	1653	0	0	0	0	0	0	0	0	0	0	6629	0	0	0	0	0	0	0	0	0	0	CACCGTCACAATCACTTCTTGCTCCCCGTCTTGTTCTTCAGCCTCCTTTAGAAGGAAAAGGCGCTCTAAATGATGTAGCTTTGGAAGAACACCATGACTACCCCAAC|-----CAACCGAACTCTTTTAAGGGAAGGGAAAATAGACCATCAACCCAAGACATCATCTAGCCAGAGTCTGAATCCATCTGTACATACACCCAACCCCCCCTTGATGCTTCCAGAACAGCAT
Tet2	Del 5|4	0	0	0	0	0	5270	0	0	0	0	0	0	0	0	0	0	0	0	0	0	0	0	0	0	0	0	CACCGTCACAATCACTTCTTGCTCCCCGTCTTGTTCTTCAGCCTCCTTTAGAAGGAAAAGGCGCTCTAAATGATGTAGCTTTGGAAGAACACCATGACTACC-----|----GCAACCGAACTCTTTTAAGGGAAGGGAAAATAGACCATCAACCCAAGACATCATCTAGCCAGAGTCTGAATCCATCTGTACATACACCCAACCCCCCCTTGATGCTTCCAGAACAGCAT
Tet2	Del 2|22	0	0	0	0	0	3471	0	0	0	0	0	0	0	0	0	0	0	0	0	0	0	0	0	0	0	0	CACCGTCACAATCACTTCTTGCTCCCCGTCTTGTTCTTCAGCCTCCTTTAGAAGGAAAAGGCGCTCTAAATGATGTAGCTTTGGAAGAACACCATGACTACCCCA--|----------------------GGGAAGGGAAAATAGACCATCAACCCAAGACATCATCTAGCCAGAGTCTGAATCCATCTGTACATACACCCAACCCCCCCTTGATGCTTCCAGAACAGCAT
Tet2	Del 0|10	0	0	0	0	0	0	2209	0	0	0	0	0	0	0	0	0	0	0	0	0	0	0	0	0	0	0	CACCGTCACAATCACTTCTTGCTCCCCGTCTTGTTCTTCAGCCTCCTTTAGAAGGAAAAGGCGCTCTAAATGATGTAGCTTTGGAAGAACACCATGACTACCCCAAC|----------GAACTCTTTTAAGGGAAGGGAAAATAGACCATCAACCCAAGACATCATCTAGCCAGAGTCTGAATCCATCTGTACATACACCCAACCCCCCCTTGATGCTTCCAGAACAGCAT
Tet2	Del 0|12	0	0	0	0	0	0	0	0	4990	0	0	0	0	0	0	0	0	0	0	0	0	0	0	0	0	0	CACCGTCACAATCACTTCTTGCTCCCCGTCTTGTTCTTCAGCCTCCTTTAGAAGGAAAAGGCGCTCTAAATGATGTAGCTTTGGAAGAACACCATGACTACCCCAAC|------------ACTCTTTTAAGGGAAGGGAAAATAGACCATCAACCCAAGACATCATCTAGCCAGAGTCTGAATCCATCTGTACATACACCCAACCCCCCCTTGATGCTTCCAGAACAGCAT
Tet2	Del 4|0	0	0	0	0	0	0	0	0	0	4704	0	10340	0	0	0	0	0	0	0	0	0	0	0	0	0	0	CACCGTCACAATCACTTCTTGCTCCCCGTCTTGTTCTTCAGCCTCCTTTAGAAGGAAAAGGCGCTCTAAATGATGTAGCTTTGGAAGAACACCATGACTACCC----|CGAAGCAACCGAACTCTTTTAAGGGAAGGGAAAATAGACCATCAACCCAAGACATCATCTAGCCAGAGTCTGAATCCATCTGTACATACACCCAACCCCCCCTTGATGCTTCCAGAACAGCAT
Tet2	Del 44|30	0	0	0	0	0	0	0	0	0	0	1342	0	0	0	0	0	0	0	0	0	0	0	0	0	0	0	CACCGTCACAATCACTTCTTGCTCCCCGTCTTGTTCTTCAGCCTCCTTTAGAAGGAAAAGGCG--------------------------------------------|------------------------------AAAATAGACCATCAACCCAAGACATCATCTAGCCAGAGTCTGAATCCATCTGTACATACACCCAACCCCCCCTTGATGCTTCCAGAACAGCAT
Tet2	Del 0|9	0	0	0	0	0	0	0	0	0	0	0	9827	0	0	0	0	14987	0	0	0	0	0	0	0	0	0	CACCGTCACAATCACTTCTTGCTCCCCGTCTTGTTCTTCAGCCTCCTTTAGAAGGAAAAGGCGCTCTAAATGATGTAGCTTTGGAAGAACACCATGACTACCCCAAC|---------CGAACTCTTTTAAGGGAAGGGAAAATAGACCATCAACCCAAGACATCATCTAGCCAGAGTCTGAATCCATCTGTACATACACCCAACCCCCCCTTGATGCTTCCAGAACAGCAT
Tet2	Del 2|0	0	0	0	0	0	0	0	0	0	0	0	0	11512	0	0	0	0	0	0	0	0	0	0	0	0	0	CACCGTCACAATCACTTCTTGCTCCCCGTCTTGTTCTTCAGCCTCCTTTAGAAGGAAAAGGCGCTCTAAATGATGTAGCTTTGGAAGAACACCATGACTACCCCA--|CGAAGCAACCGAACTCTTTTAAGGGAAGGGAAAATAGACCATCAACCCAAGACATCATCTAGCCAGAGTCTGAATCCATCTGTACATACACCCAACCCCCCCTTGATGCTTCCAGAACAGCAT
Tet2	Del 5|0	0	0	0	0	0	0	0	0	0	0	0	0	0	0	0	7011	0	0	0	0	0	0	0	0	0	0	CACCGTCACAATCACTTCTTGCTCCCCGTCTTGTTCTTCAGCCTCCTTTAGAAGGAAAAGGCGCTCTAAATGATGTAGCTTTGGAAGAACACCATGACTACC-----|CGAAGCAACCGAACTCTTTTAAGGGAAGGGAAAATAGACCATCAACCCAAGACATCATCTAGCCAGAGTCTGAATCCATCTGTACATACACCCAACCCCCCCTTGATGCTTCCAGAACAGCAT
Tet2	Del 0|4	0	0	0	0	0	0	0	0	0	0	0	0	0	0	0	0	0	0	2182	0	0	0	0	0	0	0	CACCGTCACAATCACTTCTTGCTCCCCGTCTTGTTCTTCAGCCTCCTTTAGAAGGAAAAGGCGCTCTAAATGATGTAGCTTTGGAAGAACACCATGACTACCCCAAC|----GCAACCGAACTCTTTTAAGGGAAGGGAAAATAGACCATCAACCCAAGACATCATCTAGCCAGAGTCTGAATCCATCTGTACATACACCCAACCCCCCCTTGATGCTTCCAGAACAGCAT
Tet2	Del 1|22	0	0	0	0	0	0	0	0	0	0	0	0	0	0	0	0	0	0	1018	0	0	0	0	0	0	0	CACCGTCACAATCACTTCTTGCTCCCCGTCTTGTTCTTCAGCCTCCTTTAGAAGGAAAAGGCGCTCTAAATGATGTAGCTTTGGAAGAACACCATGACTACCCCAA-|----------------------GGGAAGGGAAAATAGACCATCAACCCAAGACATCATCTAGCCAGAGTCTGAATCCATCTGTACATACACCCAACCCCCCCTTGATGCTTCCAGAACAGCAT
Tsc1	WT	11258	31986	23233	8433	27317	15305	26685	19503	8559	12781	23651	18458	32536	28651	21904	10316	36949	32736	28742	28979	24860	37817	119967	33469	67966	52893	TACTCTGCGACACAGAACATGCCCAGCATTTTCACTGTGCTTCCATTTCAGGAAGAAAGAGCAGATTCCTCAAGGCCTTACCTTCACAGACAGTCAAACGACCGAGG|ATTAGGTAAACTCCCTGGGTAATGATGGGCCTTGCTTGCCTCTTGGCATTGAACTCTGTAGCTTAAAAGCTAAGCTGGGTGGAAGAAGGATTTTCTGGGATAGCACCTATGCT
Tsc1	Del 10|10	19789	0	0	0	0	0	0	0	0	0	0	0	0	0	0	0	0	0	0	0	0	0	0	0	0	0	TACTCTGCGACACAGAACATGCCCAGCATTTTCACTGTGCTTCCATTTCAGGAAGAAAGAGCAGATTCCTCAAGGCCTTACCTTCACAGACAGTCAA----------|----------CTCCCTGGGTAATGATGGGCCTTGCTTGCCTCTTGGCATTGAACTCTGTAGCTTAAAAGCTAAGCTGGGTGGAAGAAGGATTTTCTGGGATAGCACCTATGCT
Tsc1	Del 1|0	2987	1240	7855	0	0	0	6260	0	7310	13545	0	11247	0	0	4966	0	0	6170	11834	0	0	0	3506	429	5520	2229	TACTCTGCGACACAGAACATGCCCAGCATTTTCACTGTGCTTCCATTTCAGGAAGAAAGAGCAGATTCCTCAAGGCCTTACCTTCACAGACAGTCAAACGACCGAG-|ATTAGGTAAACTCCCTGGGTAATGATGGGCCTTGCTTGCCTCTTGGCATTGAACTCTGTAGCTTAAAAGCTAAGCTGGGTGGAAGAAGGATTTTCTGGGATAGCACCTATGCT
Tsc1	Del 2|2	2631	0	0	0	0	0	0	0	0	0	0	0	0	0	0	0	0	0	0	0	0	0	0	0	0	0	TACTCTGCGACACAGAACATGCCCAGCATTTTCACTGTGCTTCCATTTCAGGAAGAAAGAGCAGATTCCTCAAGGCCTTACCTTCACAGACAGTCAAACGACCGA--|--TAGGTAAACTCCCTGGGTAATGATGGGCCTTGCTTGCCTCTTGGCATTGAACTCTGTAGCTTAAAAGCTAAGCTGGGTGGAAGAAGGATTTTCTGGGATAGCACCTATGCT
Tsc1	Del 0|5	0	2959	0	0	0	0	0	0	0	0	0	0	0	0	0	0	0	0	0	0	0	0	0	0	0	0	TACTCTGCGACACAGAACATGCCCAGCATTTTCACTGTGCTTCCATTTCAGGAAGAAAGAGCAGATTCCTCAAGGCCTTACCTTCACAGACAGTCAAACGACCGAGG|-----GTAAACTCCCTGGGTAATGATGGGCCTTGCTTGCCTCTTGGCATTGAACTCTGTAGCTTAAAAGCTAAGCTGGGTGGAAGAAGGATTTTCTGGGATAGCACCTATGCT
Tsc1	Del 7|17	0	0	0	14031	0	0	0	0	0	0	0	0	0	0	0	0	0	0	0	0	0	0	0	0	0	0	TACTCTGCGACACAGAACATGCCCAGCATTTTCACTGTGCTTCCATTTCAGGAAGAAAGAGCAGATTCCTCAAGGCCTTACCTTCACAGACAGTCAAACG-------|--------------------GGTAATGATGGGCCTTGCTTGCCTCTTGGCATTGAACTCTGTAGCTTAAAAGCTAAGCTGGGTGGAAGAAGGATTTTCTGGGATAGCACCTATGCT
Tsc1	Del 0|27	0	0	0	12566	0	0	0	0	0	0	0	0	0	0	0	0	0	0	0	0	0	0	0	0	0	0	TACTCTGCGACACAGAACATGCCCAGCATTTTCACTGTGCTTCCATTTCAGGAAGAAAGAGCAGATTCCTCAAGGCCTTACCTTCACAGACAGTCAAACGACCGAGG|---------------------------GGCCTTGCTTGCCTCTTGGCATTGAACTCTGTAGCTTAAAAGCTAAGCTGGGTGGAAGAAGGATTTTCTGGGATAGCACCTATGCT
Tsc1	Del 0|6	0	0	0	0	3428	0	0	3396	5873	0	0	0	0	0	0	0	0	0	0	0	5034	0	0	0	0	0	TACTCTGCGACACAGAACATGCCCAGCATTTTCACTGTGCTTCCATTTCAGGAAGAAAGAGCAGATTCCTCAAGGCCTTACCTTCACAGACAGTCAAACGACCGAGG|------TAAACTCCCTGGGTAATGATGGGCCTTGCTTGCCTCTTGGCATTGAACTCTGTAGCTTAAAAGCTAAGCTGGGTGGAAGAAGGATTTTCTGGGATAGCACCTATGCT
Tsc1	Del 3|18	0	0	0	0	0	8979	0	0	0	0	0	0	0	0	0	0	0	0	0	0	0	0	0	0	0	0	TACTCTGCGACACAGAACATGCCCAGCATTTTCACTGTGCTTCCATTTCAGGAAGAAAGAGCAGATTCCTCAAGGCCTTACCTTCACAGACAGTCAAACGACCG---|------------------GTAATGATGGGCCTTGCTTGCCTCTTGGCATTGAACTCTGTAGCTTAAAAGCTAAGCTGGGTGGAAGAAGGATTTTCTGGGATAGCACCTATGCT
Tsc1	Del 10|4	0	0	0	0	0	8387	0	0	0	0	0	0	0	0	0	0	0	0	0	0	0	0	0	0	0	0	TACTCTGCGACACAGAACATGCCCAGCATTTTCACTGTGCTTCCATTTCAGGAAGAAAGAGCAGATTCCTCAAGGCCTTACCTTCACAGACAGTCAA----------|----GGTAAACTCCCTGGGTAATGATGGGCCTTGCTTGCCTCTTGGCATTGAACTCTGTAGCTTAAAAGCTAAGCTGGGTGGAAGAAGGATTTTCTGGGATAGCACCTATGCT
Tsc1	Del 3|0	0	0	0	0	0	0	5861	0	0	0	0	0	0	0	0	0	0	0	0	5884	0	0	0	0	0	0	TACTCTGCGACACAGAACATGCCCAGCATTTTCACTGTGCTTCCATTTCAGGAAGAAAGAGCAGATTCCTCAAGGCCTTACCTTCACAGACAGTCAAACGACCG---|ATTAGGTAAACTCCCTGGGTAATGATGGGCCTTGCTTGCCTCTTGGCATTGAACTCTGTAGCTTAAAAGCTAAGCTGGGTGGAAGAAGGATTTTCTGGGATAGCACCTATGCT
Tsc1	Del 0|1	0	0	0	0	0	0	0	0	0	0	0	0	0	0	4395	0	0	0	0	3234	0	0	3874	350	5270	1906	TACTCTGCGACACAGAACATGCCCAGCATTTTCACTGTGCTTCCATTTCAGGAAGAAAGAGCAGATTCCTCAAGGCCTTACCTTCACAGACAGTCAAACGACCGAGG|-TTAGGTAAACTCCCTGGGTAATGATGGGCCTTGCTTGCCTCTTGGCATTGAACTCTGTAGCTTAAAAGCTAAGCTGGGTGGAAGAAGGATTTTCTGGGATAGCACCTATGCT
Tsc1	Del 52|2	0	0	0	0	0	0	0	0	0	0	0	0	0	0	0	13332	0	0	0	0	0	0	0	0	0	0	TACTCTGCGACACAGAACATGCCCAGCATTTTCACTGTGCTTCCATTTCAGGAAG----------------------------------------------------|--TAGGTAAACTCCCTGGGTAATGATGGGCCTTGCTTGCCTCTTGGCATTGAACTCTGTAGCTTAAAAGCTAAGCTGGGTGGAAGAAGGATTTTCTGGGATAGCACCTATGCT
Tsc1	Del 9|0	0	0	0	0	0	0	0	0	0	0	0	0	0	0	0	10304	0	0	0	0	0	0	0	0	0	0	TACTCTGCGACACAGAACATGCCCAGCATTTTCACTGTGCTTCCATTTCAGGAAGAAAGAGCAGATTCCTCAAGGCCTTACCTTCACAGACAGTCAAA---------|ATTAGGTAAACTCCCTGGGTAATGATGGGCCTTGCTTGCCTCTTGGCATTGAACTCTGTAGCTTAAAAGCTAAGCTGGGTGGAAGAAGGATTTTCTGGGATAGCACCTATGCT
Tsc1	Del 0|2	0	0	0	0	0	0	0	0	0	0	0	0	0	0	0	0	0	0	0	6361	5824	0	0	0	0	0	TACTCTGCGACACAGAACATGCCCAGCATTTTCACTGTGCTTCCATTTCAGGAAGAAAGAGCAGATTCCTCAAGGCCTTACCTTCACAGACAGTCAAACGACCGAGG|--TAGGTAAACTCCCTGGGTAATGATGGGCCTTGCTTGCCTCTTGGCATTGAACTCTGTAGCTTAAAAGCTAAGCTGGGTGGAAGAAGGATTTTCTGGGATAGCACCTATGCT
Tsc2	WT	12144	30463	33938	14499	55436	24555	41179	34846	36908	25439	41041	13866	5393	34168	29778	8358	11229	17148	33674	32550	34975	39814	41231	71799	57656	51088	CTAAGGTCCCTGGAGGCTACACCCTTCTCACTGTCCCCTTTTTGTCATGGCAGCATGCAGTGGAGGCACTTTGGAAGGCTGTCTCAGACTTGCTACAGCCAGAGCGGCCAC|CAGAGGCCCGGCATGCAGTTCTCACCTTATTGAAGGCCATTGTACAGGGACAGGTAAGGGGTGGAGCTGTGTGAGCCTGTGGGATGAAGGCAGACCGTCACCGTTTGAGCTCCTGC
Tsc2	Del 25|24	23887	0	0	0	0	0	0	0	0	0	0	0	0	0	0	0	0	0	0	0	0	0	0	0	0	0	CTAAGGTCCCTGGAGGCTACACCCTTCTCACTGTCCCCTTTTTGTCATGGCAGCATGCAGTGGAGGCACTTTGGAAGGCTGTCTCA------------------------- | ------------------------CCTTATTGAAGGCCATTGTACAGGGACAGGTAAGGGGTGGAGCTGTGTGAGCCTGTGGGATGAAGGCAGACCGTCACCGTTTGAGCTCCTGC
Tsc2	Del 18|12	3405	0	0	0	0	0	0	0	0	0	0	0	0	0	0	0	0	0	0	0	0	0	0	0	0	0	CTAAGGTCCCTGGAGGCTACACCCTTCTCACTGTCCCCTTTTTGTCATGGCAGCATGCAGTGGAGGCACTTTGGAAGGCTGTCTCAGACTTGC------------------ | ------------ATGCAGTTCTCACCTTATTGAAGGCCATTGTACAGGGACAGGTAAGGGGTGGAGCTGTGTGAGCCTGTGGGATGAAGGCAGACCGTCACCGTTTGAGCTCCTGC
Tsc2	Del 1|0	0	10113	18463	18870	8694	0	18087	10350	32432	26429	0	0	20362	11874	0	0	36433	8643	0	7047	8226	11352	9959	11708	10575	16878	CTAAGGTCCCTGGAGGCTACACCCTTCTCACTGTCCCCTTTTTGTCATGGCAGCATGCAGTGGAGGCACTTTGGAAGGCTGTCTCAGACTTGCTACAGCCAGAGCGGCCA-|CAGAGGCCCGGCATGCAGTTCTCACCTTATTGAAGGCCATTGTACAGGGACAGGTAAGGGGTGGAGCTGTGTGAGCCTGTGGGATGAAGGCAGACCGTCACCGTTTGAGCTCCTGC
Tsc2	Ins 1 C	0	4850	0	0	0	0	0	0	0	0	0	0	0	0	0	0	0	0	0	0	0	0	0	0	0	0	CTAAGGTCCCTGGAGGCTACACCCTTCTCACTGTCCCCTTTTTGTCATGGCAGCATGCAGTGGAGGCACTTTGGAAGGCTGTCTCAGACTTGCTACAGCCAGAGCGGCCAC{C}|CAGAGGCCCGGCATGCAGTTCTCACCTTATTGAAGGCCATTGTACAGGGACAGGTAAGGGGTGGAGCTGTGTGAGCCTGTGGGATGAAGGCAGACCGTCACCGTTTGAGCTCCTGC
Tsc2	Del 8|0	0	5212	0	0	0	0	0	0	0	0	0	0	0	0	0	0	0	0	0	8278	0	0	0	0	0	0	CTAAGGTCCCTGGAGGCTACACCCTTCTCACTGTCCCCTTTTTGTCATGGCAGCATGCAGTGGAGGCACTTTGGAAGGCTGTCTCAGACTTGCTACAGCCAG--------C|CAGAGGCCCGGCATGCAGTTCTCACCTTATTGAAGGCCATTGTACAGGGACAGGTAAGGGGTGGAGCTGTGTGAGCCTGTGGGATGAAGGCAGACCGTCACCGTTTGAGCTCCTGC
Tsc2	Del 2|0	0	2051	19917	0	0	0	0	0	0	0	0	0	0	0	17518	0	0	0	0	0	0	0	265	1424	7484	2564	CTAAGGTCCCTGGAGGCTACACCCTTCTCACTGTCCCCTTTTTGTCATGGCAGCATGCAGTGGAGGCACTTTGGAAGGCTGTCTCAGACTTGCTACAGCCAGAGCGGCC--|CAGAGGCCCGGCATGCAGTTCTCACCTTATTGAAGGCCATTGTACAGGGACAGGTAAGGGGTGGAGCTGTGTGAGCCTGTGGGATGAAGGCAGACCGTCACCGTTTGAGCTCCTGC
Tsc2	Del 0|9	0	0	0	20385	0	0	0	0	0	0	0	0	0	0	0	0	0	0	0	0	0	0	0	0	0	0	CTAAGGTCCCTGGAGGCTACACCCTTCTCACTGTCCCCTTTTTGTCATGGCAGCATGCAGTGGAGGCACTTTGGAAGGCTGTCTCAGACTTGCTACAGCCAGAGCGGCCAC|---------GGCATGCAGTTCTCACCTTATTGAAGGCCATTGTACAGGGACAGGTAAGGGGTGGAGCTGTGTGAGCCTGTGGGATGAAGGCAGACCGTCACCGTTTGAGCTCCTGC
Tsc2	Del 18|0	0	0	0	0	0	14576	0	0	0	0	0	0	0	0	0	0	0	0	0	0	0	0	0	0	0	0	CTAAGGTCCCTGGAGGCTACACCCTTCTCACTGTCCCCTTTTTGTCATGGCAGCATGCAGTGGAGGCACTTTGGAAGGCTGTCTCAGACTTGC------------------|CAGAGGCCCGGCATGCAGTTCTCACCTTATTGAAGGCCATTGTACAGGGACAGGTAAGGGGTGGAGCTGTGTGAGCCTGTGGGATGAAGGCAGACCGTCACCGTTTGAGCTCCTGC
Tsc2	Del 16|2	0	0	0	0	0	13373	0	0	0	0	0	0	0	0	0	0	0	0	0	0	0	0	0	0	0	0	CTAAGGTCCCTGGAGGCTACACCCTTCTCACTGTCCCCTTTTTGTCATGGCAGCATGCAGTGGAGGCACTTTGGAAGGCTGTCTCAGACTTGCTA---------------- | --GAGGCCCGGCATGCAGTTCTCACCTTATTGAAGGCCATTGTACAGGGACAGGTAAGGGGTGGAGCTGTGTGAGCCTGTGGGATGAAGGCAGACCGTCACCGTTTGAGCTCCTGC
Tsc2	Del 13|0	0	0	0	0	0	0	0	8084	0	0	0	0	19598	0	0	0	0	0	0	0	0	0	0	0	0	0	CTAAGGTCCCTGGAGGCTACACCCTTCTCACTGTCCCCTTTTTGTCATGGCAGCATGCAGTGGAGGCACTTTGGAAGGCTGTCTCAGACTTGCTACAG-------------|CAGAGGCCCGGCATGCAGTTCTCACCTTATTGAAGGCCATTGTACAGGGACAGGTAAGGGGTGGAGCTGTGTGAGCCTGTGGGATGAAGGCAGACCGTCACCGTTTGAGCTCCTGC
Tsc2	Del 12|0	0	0	0	0	0	0	0	0	0	0	9262	0	0	0	0	14383	0	0	0	0	0	0	131	662	5691	1411	CTAAGGTCCCTGGAGGCTACACCCTTCTCACTGTCCCCTTTTTGTCATGGCAGCATGCAGTGGAGGCACTTTGGAAGGCTGTCTCAGACTTGCTACAGC------------|CAGAGGCCCGGCATGCAGTTCTCACCTTATTGAAGGCCATTGTACAGGGACAGGTAAGGGGTGGAGCTGTGTGAGCCTGTGGGATGAAGGCAGACCGTCACCGTTTGAGCTCCTGC
Tsc2	Del 4|3	0	0	0	0	0	0	0	0	0	0	8046	0	0	0	0	0	0	0	0	0	0	0	0	0	0	0	CTAAGGTCCCTGGAGGCTACACCCTTCTCACTGTCCCCTTTTTGTCATGGCAGCATGCAGTGGAGGCACTTTGGAAGGCTGTCTCAGACTTGCTACAGCCAGAGCGG---- | ---AGGCCCGGCATGCAGTTCTCACCTTATTGAAGGCCATTGTACAGGGACAGGTAAGGGGTGGAGCTGTGTGAGCCTGTGGGATGAAGGCAGACCGTCACCGTTTGAGCTCCTGC
Tsc2	Del 32|9	0	0	0	0	0	0	0	0	0	0	0	0	0	0	0	16586	0	0	0	0	0	0	0	0	0	0	CTAAGGTCCCTGGAGGCTACACCCTTCTCACTGTCCCCTTTTTGTCATGGCAGCATGCAGTGGAGGCACTTTGGAAGGC--------------------------------|---------GGCATGCAGTTCTCACCTTATTGAAGGCCATTGTACAGGGACAGGTAAGGGGTGGAGCTGTGTGAGCCTGTGGGATGAAGGCAGACCGTCACCGTTTGAGCTCCTGC
Tsc2	Ins 1 A	0	0	0	0	0	0	0	0	0	0	0	0	0	0	0	0	0	8080	0	0	0	0	0	0	0	0	CTAAGGTCCCTGGAGGCTACACCCTTCTCACTGTCCCCTTTTTGTCATGGCAGCATGCAGTGGAGGCACTTTGGAAGGCTGTCTCAGACTTGCTACAGCCAGAGCGGCCAC{A}|CAGAGGCCCGGCATGCAGTTCTCACCTTATTGAAGGCCATTGTACAGGGACAGGTAAGGGGTGGAGCTGTGTGAGCCTGTGGGATGAAGGCAGACCGTCACCGTTTGAGCTCCTGC
Tsc2	Del 53|67	0	0	0	0	0	0	0	0	0	0	0	0	0	0	0	0	0	5227	0	0	0	0	0	0	0	0	CTAAGGTCCCTGGAGGCTACACCCTTCTCACTGTCCCCTTTTTGTCATGGCAGCATGC----------------------------------------------------- | -------------------------------------------------------------------TGTGTGAGCCTGTGGGATGAAGGCAGACCGTCACCGTTTGAGCTCCTGC
Tsc2	Del 5|3	0	0	0	0	0	0	0	0	0	0	0	0	0	10969	0	0	0	0	0	0	0	0	0	0	0	0	CTAAGGTCCCTGGAGGCTACACCCTTCTCACTGTCCCCTTTTTGTCATGGCAGCATGCAGTGGAGGCACTTTGGAAGGCTGTCTCAGACTTGCTACAGCCAGAGCG----- | ---AGGCCCGGCATGCAGTTCTCACCTTATTGAAGGCCATTGTACAGGGACAGGTAAGGGGTGGAGCTGTGTGAGCCTGTGGGATGAAGGCAGACCGTCACCGTTTGAGCTCCTGC
Tsc2	Del 3|0	0	0	0	0	0	0	0	0	0	0	0	14263	0	0	0	0	0	0	0	0	0	0	0	0	0	0	CTAAGGTCCCTGGAGGCTACACCCTTCTCACTGTCCCCTTTTTGTCATGGCAGCATGCAGTGGAGGCACTTTGGAAGGCTGTCTCAGACTTGCTACAGCCAGAGCGGC---|CAGAGGCCCGGCATGCAGTTCTCACCTTATTGAAGGCCATTGTACAGGGACAGGTAAGGGGTGGAGCTGTGTGAGCCTGTGGGATGAAGGCAGACCGTCACCGTTTGAGCTCCTGC
Tsc2	Del 41|7	0	0	0	0	0	0	0	0	0	0	0	17327	0	0	0	0	0	0	0	0	0	0	0	0	0	0	CTAAGGTCCCTGGAGGCTACACCCTTCTCACTGTCCCCTTTTTGTCATGGCAGCATGCAGTGGAGGCACT----------------------------------------- | -------CCGGCATGCAGTTCTCACCTTATTGAAGGCCATTGTACAGGGACAGGTAAGGGGTGGAGCTGTGTGAGCCTGTGGGATGAAGGCAGACCGTCACCGTTTGAGCTCCTGC
Tsc2	Del 14|0	0	0	0	0	0	0	0	0	0	0	0	0	0	0	0	0	0	0	6669	0	0	0	0	0	0	0	CTAAGGTCCCTGGAGGCTACACCCTTCTCACTGTCCCCTTTTTGTCATGGCAGCATGCAGTGGAGGCACTTTGGAAGGCTGTCTCAGACTTGCTACA--------------|CAGAGGCCCGGCATGCAGTTCTCACCTTATTGAAGGCCATTGTACAGGGACAGGTAAGGGGTGGAGCTGTGTGAGCCTGTGGGATGAAGGCAGACCGTCACCGTTTGAGCTCCTGC
Tsc2	Del 16|0	0	0	0	0	0	0	0	0	0	0	0	0	0	0	0	0	0	0	6530	0	0	0	0	0	0	0	CTAAGGTCCCTGGAGGCTACACCCTTCTCACTGTCCCCTTTTTGTCATGGCAGCATGCAGTGGAGGCACTTTGGAAGGCTGTCTCAGACTTGCTA----------------|CAGAGGCCCGGCATGCAGTTCTCACCTTATTGAAGGCCATTGTACAGGGACAGGTAAGGGGTGGAGCTGTGTGAGCCTGTGGGATGAAGGCAGACCGTCACCGTTTGAGCTCCTGC
Tsc2	Del 2|8	0	0	0	0	0	0	0	0	0	0	0	0	0	0	0	0	0	0	0	6337	8235	0	0	0	0	0	CTAAGGTCCCTGGAGGCTACACCCTTCTCACTGTCCCCTTTTTGTCATGGCAGCATGCAGTGGAGGCACTTTGGAAGGCTGTCTCAGACTTGCTACAGCCAGAGCGGCC-- | --------CGGCATGCAGTTCTCACCTTATTGAAGGCCATTGTACAGGGACAGGTAAGGGGTGGAGCTGTGTGAGCCTGTGGGATGAAGGCAGACCGTCACCGTTTGAGCTCCTGC
Tsc2	Del 9|0	0	0	0	0	0	0	0	0	0	0	0	0	0	0	0	0	0	0	0	3820	0	0	0	0	0	0	CTAAGGTCCCTGGAGGCTACACCCTTCTCACTGTCCCCTTTTTGTCATGGCAGCATGCAGTGGAGGCACTTTGGAAGGCTGTCTCAGACTTGCTACAGCCAG---------|CAGAGGCCCGGCATGCAGTTCTCACCTTATTGAAGGCCATTGTACAGGGACAGGTAAGGGGTGGAGCTGTGTGAGCCTGTGGGATGAAGGCAGACCGTCACCGTTTGAGCTCCTGC
Tsc2	Del 3|0 Ins 1T	0	0	0	0	0	0	0	0	0	0	0	0	0	0	0	0	0	0	0	0	0	0	7601	8043	8862	12708	CTAAGGTCCCTGGAGGCTACACCCTTCTCACTGTCCCCTTTTTGTCATGGCAGCATGCAGTGGAGGCACTTTGGAAGGCTGTCTCAGACTTGCTACAGCCAGAGCGGC---{T}|CAGAGGCCCGGCATGCAGTTCTCACCTTATTGAAGGCCATTGTACAGGGACAGGTAAGGGGTGGAGCTGTGTGAGCCTGTGGGATGAAGGCAGACCGTCACCGTTTGAGCTCCTGC
Tsc2	Del 5|5 Ins 2 TA	0	0	0	0	0	0	0	0	0	0	0	0	0	0	0	0	0	0	0	0	0	0	5962	6973	5771	10027	CTAAGGTCCCTGGAGGCTACACCCTTCTCACTGTCCCCTTTTTGTCATGGCAGCATGCAGTGGAGGCACTTTGGAAGGCTGTCTCAGACTTGCTACAGCCAGAGC-----C|{TA}-----GCCCGGCATGCAGTTCTCACCTTATTGAAGGCCATTGTACAGGGACAGGTAAGGGGTGGAGCTGTGTGAGCCTGTGGGATGAAGGCAGACCGTCACCGTTTGAGCTCCTGC

## Sheet: MF
Target Gene	Mutation Type	1T1	1T2	1T3	1T4	1T5	1T6	1T7	1T8	1T9	1T10	1T11	2T1	2T2	2T3	2T4	2T5	2T6	2T7	3T1	3T2	3T3	4T5	P1	P2	P3	P4	Reference
Apc	WT	27.7726	69.7272	65.881	28.7771	81.1973	51.2555	74.3587	64.9939	44.2914	51.2161	84.5016	38.1433	28.5199	62.354	68.1407	24.3027	26.2597	51.8616	74.3568	60.6833	61.4373	66.3265	53.7253	63.7865	58.3852	56.4863	CATGGCATAAAGCAGTTACTACATAAGAACTTGTTTCTGTTTAGAATTTAACTTAGATAGTAATTTCCCCGGAGTGAAACTACGCTCAAAAATGTCCCTTCGCTCCTACG|GAAGTCGGGAAGGATCTGTATCCAGCCGTTCAGGAGAATGCAGTCCTGTCCCCATGGGGTCATTCCCAAGAAGAACATTTGTAAATGGAAGCAGAGAGAGTACTGGGTATC
Apc	Del 1|0	72.2274	10.47	0	0	8.28284	24.5146	9.74348	19.4937	30.4489	24.7984	0	61.8567	0	37.646	17.5829	37.5369	37.0463	24.7785	0	5.63341	30.5252	17.3413	3.12552	3.3797	2.11584	4.13539	CATGGCATAAAGCAGTTACTACATAAGAACTTGTTTCTGTTTAGAATTTAACTTAGATAGTAATTTCCCCGGAGTGAAACTACGCTCAAAAATGTCCCTTCGCTCCTAC-|GAAGTCGGGAAGGATCTGTATCCAGCCGTTCAGGAGAATGCAGTCCTGTCCCCATGGGGTCATTCCCAAGAAGAACATTTGTAAATGGAAGCAGAGAGAGTACTGGGTATC
Apc	Del 0|4	0	9.90536	34.119	0	0	0	0	0	0	0	0	0	0	0	0	0	0	0	0	0	8.0375	0	0	0	0	0	CATGGCATAAAGCAGTTACTACATAAGAACTTGTTTCTGTTTAGAATTTAACTTAGATAGTAATTTCCCCGGAGTGAAACTACGCTCAAAAATGTCCCTTCGCTCCTACG|----TCGGGAAGGATCTGTATCCAGCCGTTCAGGAGAATGCAGTCCTGTCCCCATGGGGTCATTCCCAAGAAGAACATTTGTAAATGGAAGCAGAGAGAGTACTGGGTATC
Apc	Del 0|1 Ins 2 AA	0	9.89741	0	0	0	0	0	0	0	0	0	0	0	0	0	0	0	0	0	0	0	0	0	0	0	0	CATGGCATAAAGCAGTTACTACATAAGAACTTGTTTCTGTTTAGAATTTAACTTAGATAGTAATTTCCCCGGAGTGAAACTACGCTCAAAAATGTCCCTTCGCTCCTACG|-{AA}AAGTCGGGAAGGATCTGTATCCAGCCGTTCAGGAGAATGCAGTCCTGTCCCCATGGGGTCATTCCCAAGAAGAACATTTGTAAATGGAAGCAGAGAGAGTACTGGGTATC
Apc	Del 11|2	0	0	0	36.4104	0	0	0	0	0	0	0	0	0	0	0	0	0	0	0	0	0	0	0	0	0	0	CATGGCATAAAGCAGTTACTACATAAGAACTTGTTTCTGTTTAGAATTTAACTTAGATAGTAATTTCCCCGGAGTGAAACTACGCTCAAAAATGTCCCT-----------|--AGTCGGGAAGGATCTGTATCCAGCCGTTCAGGAGAATGCAGTCCTGTCCCCATGGGGTCATTCCCAAGAAGAACATTTGTAAATGGAAGCAGAGAGAGTACTGGGTATC
Apc	Del 6|9	0	0	0	34.8125	0	0	0	0	0	0	0	0	0	0	0	0	0	0	0	0	0	0	0	0	0	0	CATGGCATAAAGCAGTTACTACATAAGAACTTGTTTCTGTTTAGAATTTAACTTAGATAGTAATTTCCCCGGAGTGAAACTACGCTCAAAAATGTCCCTTCGCT------|---------AAGGATCTGTATCCAGCCGTTCAGGAGAATGCAGTCCTGTCCCCATGGGGTCATTCCCAAGAAGAACATTTGTAAATGGAAGCAGAGAGAGTACTGGGTATC
Apc	Del 22|24	0	0	0	0	10.5198	0	0	0	0	0	0	0	0	0	0	0	0	0	0	0	0	0	0	0	0	0	CATGGCATAAAGCAGTTACTACATAAGAACTTGTTTCTGTTTAGAATTTAACTTAGATAGTAATTTCCCCGGAGTGAAACTACGCTCA----------------------|------------------------GCCGTTCAGGAGAATGCAGTCCTGTCCCCATGGGGTCATTCCCAAGAAGAACATTTGTAAATGGAAGCAGAGAGAGTACTGGGTATC
Apc	Del 0|5	0	0	0	0	0	24.2299	0	0	25.2597	0	0	0	0	0	0	0	0	0	0	0	0	0	0	0	0	0	CATGGCATAAAGCAGTTACTACATAAGAACTTGTTTCTGTTTAGAATTTAACTTAGATAGTAATTTCCCCGGAGTGAAACTACGCTCAAAAATGTCCCTTCGCTCCTACG|-----CGGGAAGGATCTGTATCCAGCCGTTCAGGAGAATGCAGTCCTGTCCCCATGGGGTCATTCCCAAGAAGAACATTTGTAAATGGAAGCAGAGAGAGTACTGGGTATC
Apc	Del 0|7	0	0	0	0	0	0	8.53402	0	0	23.9855	0	0	0	0	0	38.1604	0	0	0	0	0	0	0	0	0	0	CATGGCATAAAGCAGTTACTACATAAGAACTTGTTTCTGTTTAGAATTTAACTTAGATAGTAATTTCCCCGGAGTGAAACTACGCTCAAAAATGTCCCTTCGCTCCTACG|-------GGAAGGATCTGTATCCAGCCGTTCAGGAGAATGCAGTCCTGTCCCCATGGGGTCATTCCCAAGAAGAACATTTGTAAATGGAAGCAGAGAGAGTACTGGGTATC
Apc	Del 5|6	0	0	0	0	0	0	7.3638	0	0	0	0	0	0	0	0	0	0	0	0	0	0	0	0	0	0	0	CATGGCATAAAGCAGTTACTACATAAGAACTTGTTTCTGTTTAGAATTTAACTTAGATAGTAATTTCCCCGGAGTGAAACTACGCTCAAAAATGTCCCTTCGCTC-----|------GGGAAGGATCTGTATCCAGCCGTTCAGGAGAATGCAGTCCTGTCCCCATGGGGTCATTCCCAAGAAGAACATTTGTAAATGGAAGCAGAGAGAGTACTGGGTATC
Apc	Del 4|3	0	0	0	0	0	0	0	15.5124	0	0	0	0	0	0	0	0	0	0	0	0	0	0	0	0	0	0	CATGGCATAAAGCAGTTACTACATAAGAACTTGTTTCTGTTTAGAATTTAACTTAGATAGTAATTTCCCCGGAGTGAAACTACGCTCAAAAATGTCCCTTCGCTCC----|---GTCGGGAAGGATCTGTATCCAGCCGTTCAGGAGAATGCAGTCCTGTCCCCATGGGGTCATTCCCAAGAAGAACATTTGTAAATGGAAGCAGAGAGAGTACTGGGTATC
Apc	Del 0|2	0	0	0	0	0	0	0	0	0	0	15.4984	0	71.4801	0	0	0	0	0	0	0	0	0	0	0	0	0	CATGGCATAAAGCAGTTACTACATAAGAACTTGTTTCTGTTTAGAATTTAACTTAGATAGTAATTTCCCCGGAGTGAAACTACGCTCAAAAATGTCCCTTCGCTCCTACG|--AGTCGGGAAGGATCTGTATCCAGCCGTTCAGGAGAATGCAGTCCTGTCCCCATGGGGTCATTCCCAAGAAGAACATTTGTAAATGGAAGCAGAGAGAGTACTGGGTATC
Apc	Ins 1 A	0	0	0	0	0	0	0	0	0	0	0	0	0	0	14.2764	0	0	0	0	0	0	0	0	0	0	0	CATGGCATAAAGCAGTTACTACATAAGAACTTGTTTCTGTTTAGAATTTAACTTAGATAGTAATTTCCCCGGAGTGAAACTACGCTCAAAAATGTCCCTTCGCTCCTACG|{A}GAAGTCGGGAAGGATCTGTATCCAGCCGTTCAGGAGAATGCAGTCCTGTCCCCATGGGGTCATTCCCAAGAAGAACATTTGTAAATGGAAGCAGAGAGAGTACTGGGTATC
Apc	Del 6|1	0	0	0	0	0	0	0	0	0	0	0	0	0	0	0	0	36.6941	0	0	0	0	0	0	0	0	0	CATGGCATAAAGCAGTTACTACATAAGAACTTGTTTCTGTTTAGAATTTAACTTAGATAGTAATTTCCCCGGAGTGAAACTACGCTCAAAAATGTCCCTTCGCT------|-AAGTCGGGAAGGATCTGTATCCAGCCGTTCAGGAGAATGCAGTCCTGTCCCCATGGGGTCATTCCCAAGAAGAACATTTGTAAATGGAAGCAGAGAGAGTACTGGGTATC
Apc	Del 0|8	0	0	0	0	0	0	0	0	0	0	0	0	0	0	0	0	0	23.3599	0	0	0	0	0	0	0	0	CATGGCATAAAGCAGTTACTACATAAGAACTTGTTTCTGTTTAGAATTTAACTTAGATAGTAATTTCCCCGGAGTGAAACTACGCTCAAAAATGTCCCTTCGCTCCTACG|--------GAAGGATCTGTATCCAGCCGTTCAGGAGAATGCAGTCCTGTCCCCATGGGGTCATTCCCAAGAAGAACATTTGTAAATGGAAGCAGAGAGAGTACTGGGTATC
Apc	Del 5|16	0	0	0	0	0	0	0	0	0	0	0	0	0	0	0	0	0	0	12.827	0	0	0	0	0	0	0	CATGGCATAAAGCAGTTACTACATAAGAACTTGTTTCTGTTTAGAATTTAACTTAGATAGTAATTTCCCCGGAGTGAAACTACGCTCAAAAATGTCCCTTCGCTC-----|----------------TGTATCCAGCCGTTCAGGAGAATGCAGTCCTGTCCCCATGGGGTCATTCCCAAGAAGAACATTTGTAAATGGAAGCAGAGAGAGTACTGGGTATC
Apc	Del 0|13	0	0	0	0	0	0	0	0	0	0	0	0	0	0	0	0	0	0	12.8162	0	0	0	0	0	0	0	CATGGCATAAAGCAGTTACTACATAAGAACTTGTTTCTGTTTAGAATTTAACTTAGATAGTAATTTCCCCGGAGTGAAACTACGCTCAAAAATGTCCCTTCGCTCCTACG|-------------ATCTGTATCCAGCCGTTCAGGAGAATGCAGTCCTGTCCCCATGGGGTCATTCCCAAGAAGAACATTTGTAAATGGAAGCAGAGAGAGTACTGGGTATC
Apc	Ins 1 T	0	0	0	0	0	0	0	0	0	0	0	0	0	0	0	0	0	0	0	17.233	0	0	0	0	0	0	CATGGCATAAAGCAGTTACTACATAAGAACTTGTTTCTGTTTAGAATTTAACTTAGATAGTAATTTCCCCGGAGTGAAACTACGCTCAAAAATGTCCCTTCGCTCCTACG|{T}GAAGTCGGGAAGGATCTGTATCCAGCCGTTCAGGAGAATGCAGTCCTGTCCCCATGGGGTCATTCCCAAGAAGAACATTTGTAAATGGAAGCAGAGAGAGTACTGGGTATC
Apc	Del 2|0	0	0	0	0	0	0	0	0	0	0	0	0	0	0	0	0	0	0	0	16.4503	0	16.3322	13.9438	11.6067	14.5414	14.9979	CATGGCATAAAGCAGTTACTACATAAGAACTTGTTTCTGTTTAGAATTTAACTTAGATAGTAATTTCCCCGGAGTGAAACTACGCTCAAAAATGTCCCTTCGCTCCTA--|GAAGTCGGGAAGGATCTGTATCCAGCCGTTCAGGAGAATGCAGTCCTGTCCCCATGGGGTCATTCCCAAGAAGAACATTTGTAAATGGAAGCAGAGAGAGTACTGGGTATC
Apc	Del 5|0	0	0	0	0	0	0	0	0	0	0	0	0	0	0	0	0	0	0	0	0	0	0	15.0472	10.4713	11.5839	11.3936	CATGGCATAAAGCAGTTACTACATAAGAACTTGTTTCTGTTTAGAATTTAACTTAGATAGTAATTTCCCCGGAGTGAAACTACGCTCAAAAATGTCCCTTCGCTC-----|GAAGTCGGGAAGGATCTGTATCCAGCCGTTCAGGAGAATGCAGTCCTGTCCCCATGGGGTCATTCCCAAGAAGAACATTTGTAAATGGAAGCAGAGAGAGTACTGGGTATC
Apc	Del 3|0	0	0	0	0	0	0	0	0	0	0	0	0	0	0	0	0	0	0	0	0	0	0	14.1582	10.7558	13.3737	12.9868	CATGGCATAAAGCAGTTACTACATAAGAACTTGTTTCTGTTTAGAATTTAACTTAGATAGTAATTTCCCCGGAGTGAAACTACGCTCAAAAATGTCCCTTCGCTCCT---|GAAGTCGGGAAGGATCTGTATCCAGCCGTTCAGGAGAATGCAGTCCTGTCCCCATGGGGTCATTCCCAAGAAGAACATTTGTAAATGGAAGCAGAGAGAGTACTGGGTATC
Apob	WT	22.9718	54.0569	48.3454	28.7861	90.332	51.1058	67.8356	73.1323	39.9536	50.6582	65.8841	34.5638	13.2722	60.7702	67.5112	24.8987	25.1158	31.9262	68.1225	62.8315	70.3408	66.0011	71.8682	82.3184	60.8063	54.4017	TCCGAAGACCCTGTAGAGCAAGCAGCAGGGGCTAGGCCCGTGGCCAGGCCACAGCCAGGAAGCCACCCCACCATCCATCCGCCATGGGCCCACGAAAGCCTGCCCTGC|GGACGCCGTTACTGCTGCTGTTCCTGCTACTGTTCTTGGACACCAGCGTCTGGGCTCGTGAGTTAGGGTGGAAGCCTGGGAGAAAGCCA
Apob	Del 0|1	77.0282	37.8909	23.998	36.6221	9.66796	0	6.56819	14.0487	60.0464	49.3418	18.5594	65.4362	86.7278	39.2298	32.4888	75.1013	37.5348	68.0738	0	30.4664	29.6592	16.1746	27.4727	17.1843	24.1452	44.6641	TCCGAAGACCCTGTAGAGCAAGCAGCAGGGGCTAGGCCCGTGGCCAGGCCACAGCCAGGAAGCCACCCCACCATCCATCCGCCATGGGCCCACGAAAGCCTGCCCTGC|-GACGCCGTTACTGCTGCTGTTCCTGCTACTGTTCTTGGACACCAGCGTCTGGGCTCGTGAGTTAGGGTGGAAGCCTGGGAGAAAGCCA
Apob	Del 1|0	0	8.05213	0	0	0	0	0	0	0	0	0	0	0	0	0	0	0	0	0	0	0	0	0	0	0	0	TCCGAAGACCCTGTAGAGCAAGCAGCAGGGGCTAGGCCCGTGGCCAGGCCACAGCCAGGAAGCCACCCCACCATCCATCCGCCATGGGCCCACGAAAGCCTGCCCTG-|GGACGCCGTTACTGCTGCTGTTCCTGCTACTGTTCTTGGACACCAGCGTCTGGGCTCGTGAGTTAGGGTGGAAGCCTGGGAGAAAGCCA
Apob	Del 0|9	0	0	27.6566	0	0	0	0	0	0	0	0	0	0	0	0	0	0	0	0	0	0	0	0	0	0	0	TCCGAAGACCCTGTAGAGCAAGCAGCAGGGGCTAGGCCCGTGGCCAGGCCACAGCCAGGAAGCCACCCCACCATCCATCCGCCATGGGCCCACGAAAGCCTGCCCTGC|G---------ACTGCTGCTGTTCCTGCTACTGTTCTTGGACACCAGCGTCTGGGCTCGTGAGTTAGGGTGGAAGCCTGGGAGAAAGCCA
Apob	Del 2|0	0	0	0	34.5918	0	0	0	0	0	0	0	0	0	0	0	0	0	0	0	0	0	0	0	0	0	0	TCCGAAGACCCTGTAGAGCAAGCAGCAGGGGCTAGGCCCGTGGCCAGGCCACAGCCAGGAAGCCACCCCACCATCCATCCGCCATGGGCCCACGAAAGCCTGCCCT--|GGACGCCGTTACTGCTGCTGTTCCTGCTACTGTTCTTGGACACCAGCGTCTGGGCTCGTGAGTTAGGGTGGAAGCCTGGGAGAAAGCCA
Apob	Del 0|5	0	0	0	0	0	24.5109	0	0	0	0	0	0	0	0	0	0	0	0	0	0	0	17.8243	0	0	0	0	TCCGAAGACCCTGTAGAGCAAGCAGCAGGGGCTAGGCCCGTGGCCAGGCCACAGCCAGGAAGCCACCCCACCATCCATCCGCCATGGGCCCACGAAAGCCTGCCCTGC|G-----CGTTACTGCTGCTGTTCCTGCTACTGTTCTTGGACACCAGCGTCTGGGCTCGTGAGTTAGGGTGGAAGCCTGGGAGAAAGCCA
Apob	Del 0|4	0	0	0	0	0	24.3833	0	0	0	0	0	0	0	0	0	0	0	0	0	0	0	0	0	0	0	0	TCCGAAGACCCTGTAGAGCAAGCAGCAGGGGCTAGGCCCGTGGCCAGGCCACAGCCAGGAAGCCACCCCACCATCCATCCGCCATGGGCCCACGAAAGCCTGCCCTGC|----GCCGTTACTGCTGCTGTTCCTGCTACTGTTCTTGGACACCAGCGTCTGGGCTCGTGAGTTAGGGTGGAAGCCTGGGAGAAAGCCA
Apob	Del 3|41	0	0	0	0	0	0	12.6121	0	0	0	0	0	0	0	0	0	0	0	0	0	0	0	0	0	0	0	TCCGAAGACCCTGTAGAGCAAGCAGCAGGGGCTAGGCCCGTGGCCAGGCCACAGCCAGGAAGCCACCCCACCATCCATCCGCCATGGGCCCACGAAAGCCTGCCC--- | -----------------------------------------ACCAGCGTCTGGGCTCGTGAGTTAGGGTGGAAGCCTGGGAGAAAGCCA
Apob	Del 0|15	0	0	0	0	0	0	12.9842	0	0	0	0	0	0	0	0	0	0	0	0	0	0	0	0	0	0	0	TCCGAAGACCCTGTAGAGCAAGCAGCAGGGGCTAGGCCCGTGGCCAGGCCACAGCCAGGAAGCCACCCCACCATCCATCCGCCATGGGCCCACGAAAGCCTGCCCTGC|---------------TGCTGTTCCTGCTACTGTTCTTGGACACCAGCGTCTGGGCTCGTGAGTTAGGGTGGAAGCCTGGGAGAAAGCCA
Apob	Ins 1 G	0	0	0	0	0	0	0	12.819	0	0	0	0	0	0	0	0	0	0	0	0	0	0	0	0	0	0	TCCGAAGACCCTGTAGAGCAAGCAGCAGGGGCTAGGCCCGTGGCCAGGCCACAGCCAGGAAGCCACCCCACCATCCATCCGCCATGGGCCCACGAAAGCCTGCCCTGC|{G}GGACGCCGTTACTGCTGCTGTTCCTGCTACTGTTCTTGGACACCAGCGTCTGGGCTCGTGAGTTAGGGTGGAAGCCTGGGAGAAAGCCA
Apob	Del 0|16	0	0	0	0	0	0	0	0	0	0	15.5565	0	0	0	0	0	0	0	0	0	0	0	0	0	0	0	TCCGAAGACCCTGTAGAGCAAGCAGCAGGGGCTAGGCCCGTGGCCAGGCCACAGCCAGGAAGCCACCCCACCATCCATCCGCCATGGGCCCACGAAAGCCTGCCCTGC|----------------GCTGTTCCTGCTACTGTTCTTGGACACCAGCGTCTGGGCTCGTGAGTTAGGGTGGAAGCCTGGGAGAAAGCCA
Apob	Del 4|0	0	0	0	0	0	0	0	0	0	0	0	0	0	0	0	0	37.3494	0	0	0	0	0	0	0	0	0	TCCGAAGACCCTGTAGAGCAAGCAGCAGGGGCTAGGCCCGTGGCCAGGCCACAGCCAGGAAGCCACCCCACCATCCATCCGCCATGGGCCCACGAAAGCCTGCC----|GGACGCCGTTACTGCTGCTGTTCCTGCTACTGTTCTTGGACACCAGCGTCTGGGCTCGTGAGTTAGGGTGGAAGCCTGGGAGAAAGCCA
Apob	Del 0|11	0	0	0	0	0	0	0	0	0	0	0	0	0	0	0	0	0	0	14.4711	0	0	0	0.383346	0.302682	8.53028	0.55079	TCCGAAGACCCTGTAGAGCAAGCAGCAGGGGCTAGGCCCGTGGCCAGGCCACAGCCAGGAAGCCACCCCACCATCCATCCGCCATGGGCCCACGAAAGCCTGCCCTGC|G-----------TGCTGCTGTTCCTGCTACTGTTCTTGGACACCAGCGTCTGGGCTCGTGAGTTAGGGTGGAAGCCTGGGAGAAAGCCA
Apob	Del 0|28	0	0	0	0	0	0	0	0	0	0	0	0	0	0	0	0	0	0	12.4668	0	0	0	0	0	0	0	TCCGAAGACCCTGTAGAGCAAGCAGCAGGGGCTAGGCCCGTGGCCAGGCCACAGCCAGGAAGCCACCCCACCATCCATCCGCCATGGGCCCACGAAAGCCTGCCCTGC|G----------------------------CTGTTCCTGCTACTGTTCTTGGACACCAGCGTCTGGGCTCGTGAGTTAGGGTGGAAGCCTGGGAGAAAGCCA
Apob	Del 0|28	0	0	0	0	0	0	0	0	0	0	0	0	0	0	0	0	0	0	4.93961	0	0	0	0	0	0	0	TCCGAAGACCCTGTAGAGCAAGCAGCAGGGGCTAGGCCCGTGGCCAGGCCACAGCCAGGAAGCCACCCCACCATCCATCCGCCATGGGCCCACGAAAGCCTGCCCTGC|GGACGCCGTTACTGCTGCTGTTCCTGCTACTGTTCTTGGACACCAGCGTCTGGGCTCGTGAGTTAGGGTGGAAGCCTGGGAGAAAGCCA
Apob	Del 0|2	0	0	0	0	0	0	0	0	0	0	0	0	0	0	0	0	0	0	0	6.70217	0	0	0	0	0	0	TCCGAAGACCCTGTAGAGCAAGCAGCAGGGGCTAGGCCCGTGGCCAGGCCACAGCCAGGAAGCCACCCCACCATCCATCCGCCATGGGCCCACGAAAGCCTGCCCTGC|--ACGCCGTTACTGCTGCTGTTCCTGCTACTGTTCTTGGACACCAGCGTCTGGGCTCGTGAGTTAGGGTGGAAGCCTGGGAGAAAGCCA
Apob	Del 4|4	0	0	0	0	0	0	0	0	0	0	0	0	0	0	0	0	0	0	0	0	0	0	0.275831	0.194582	6.51826	0.383393	TCCGAAGACCCTGTAGAGCAAGCAGCAGGGGCTAGGCCCGTGGCCAGGCCACAGCCAGGAAGCCACCCCACCATCCATCCGCCATGGGCCCACGAAAGCCTGCC---- | ----GCCGTTACTGCTGCTGTTCCTGCTACTGTTCTTGGACACCAGCGTCTGGGCTCGTGAGTTAGGGTGGAAGCCTGGGAGAAAGCCA
Arid1a	WT	33.2722	58.2091	49.0063	26.7067	77.8607	48.4845	72.6181	63.3603	37.8624	51.0679	81.8891	49.2419	22.4134	74.9454	64.3435	22.8696	24.2529	100	73.8041	73.8937	67.3558	62.8228	61.7073	72.357	55.7345	56.907	TATGCAGAGGAACCCCCAGATGCCCCAGTACACTTCCCCTCAGCCTGGCTCGGCCTTATCCCCACGTCAGCCGTCTGGAGGACAGATGCACTCGGG|CGTGGGCTCCTACCAGCAGAACTCCATTAGGGGAGCTACGGCCCCCAGGGCAGTCAGTATGGCCCACAAGGTAAGTGTGCTACCCCTTTAGAAGGAAAGAGAGGTACTGTGTTAACGGCTG
Arid1a	Del 37|14	49.6001	0	0	0	0	0	0	5.0429	0	0	0	0	0	0	0	0	0	0	0	0	0	0	0	0	0	0	TATGCAGAGGAACCCCCAGATGCCCCAGTACACTTCCCCTCAGCCTGGCTCGGCCTTAT-------------------------------------|--------------AGCAGAACTCCATTAGGGGAGCTACGGCCCCCAGGGCAGTCAGTATGGCCCACAAGGTAAGTGTGCTACCCCTTTAGAAGGAAAGAGAGGTACTGTGTTAACGGCTG
Arid1a	Del 13|2	9.20067	0	0	0	0	0	0	0	0	0	0	0	0	0	0	0	0	0	0	0	0	0	0	0	0	0	TATGCAGAGGAACCCCCAGATGCCCCAGTACACTTCCCCTCAGCCTGGCTCGGCCTTATCCCCACGTCAGCCGTCTGGAGGAC-------------|--TGGGCTCCTACCAGCAGAACTCCATTAGGGGAGCTACGGCCCCCAGGGCAGTCAGTATGGCCCACAAGGTAAGTGTGCTACCCCTTTAGAAGGAAAGAGAGGTACTGTGTTAACGGCTG
Arid1a	Del 1|0	7.92705	0	0	0	0	0	0	0	0	0	0	50.7581	0	0	0	0	0	0	0	0	15.7859	17.5656	1.65372	1.12176	0.853833	0.692623	TATGCAGAGGAACCCCCAGATGCCCCAGTACACTTCCCCTCAGCCTGGCTCGGCCTTATCCCCACGTCAGCCGTCTGGAGGACAGATGCACTCGG-|CGTGGGCTCCTACCAGCAGAACTCCATTAGGGGAGCTACGGCCCCCAGGGCAGTCAGTATGGCCCACAAGGTAAGTGTGCTACCCCTTTAGAAGGAAAGAGAGGTACTGTGTTAACGGCTG
Arid1a	Del 1|2	0	13.4794	0	0	0	0	15.2389	0	0	0	0	0	0	0	0	0	0	0	0	0	0	0	0	0	0	0	TATGCAGAGGAACCCCCAGATGCCCCAGTACACTTCCCCTCAGCCTGGCTCGGCCTTATCCCCACGTCAGCCGTCTGGAGGACAGATGCACTCGG-|--TGGGCTCCTACCAGCAGAACTCCATTAGGGGAGCTACGGCCCCCAGGGCAGTCAGTATGGCCCACAAGGTAAGTGTGCTACCCCTTTAGAAGGAAAGAGAGGTACTGTGTTAACGGCTG
Arid1a	Del 0|2	0	10.014	0	0	11.1304	0	0	0	0	0	0	0	77.5866	0	19.5625	0	38.0484	0	14.2833	16.2696	16.8583	0	0.857192	0.639182	5.26146	5.91528	TATGCAGAGGAACCCCCAGATGCCCCAGTACACTTCCCCTCAGCCTGGCTCGGCCTTATCCCCACGTCAGCCGTCTGGAGGACAGATGCACTCGGG|--TGGGCTCCTACCAGCAGAACTCCATTAGGGGAGCTACGGCCCCCAGGGCAGTCAGTATGGCCCACAAGGTAAGTGTGCTACCCCTTTAGAAGGAAAGAGAGGTACTGTGTTAACGGCTG
Arid1a	Del 2|0	0	9.73524	0	0	0	0	0	0	0	0	0	0	0	0	0	0	0	0	0	0	0	19.6115	0	0	0	0	TATGCAGAGGAACCCCCAGATGCCCCAGTACACTTCCCCTCAGCCTGGCTCGGCCTTATCCCCACGTCAGCCGTCTGGAGGACAGATGCACTCG--|CGTGGGCTCCTACCAGCAGAACTCCATTAGGGGAGCTACGGCCCCCAGGGCAGTCAGTATGGCCCACAAGGTAAGTGTGCTACCCCTTTAGAAGGAAAGAGAGGTACTGTGTTAACGGCTG
Arid1a	Del 0|6	0	8.56222	0	0	0	0	12.143	0	0	0	0	0	0	0	16.094	0	0	0	0	0	0	0	0	0	0	0	TATGCAGAGGAACCCCCAGATGCCCCAGTACACTTCCCCTCAGCCTGGCTCGGCCTTATCCCCACGTCAGCCGTCTGGAGGACAGATGCACTCGGG|------CTCCTACCAGCAGAACTCCATTAGGGGAGCTACGGCCCCCAGGGCAGTCAGTATGGCCCACAAGGTAAGTGTGCTACCCCTTTAGAAGGAAAGAGAGGTACTGTGTTAACGGCTG
Arid1a	Del 8|1	0	0	26.7291	0	0	0	0	0	0	0	0	0	0	0	0	0	0	0	0	0	0	0	0	0	0	0	TATGCAGAGGAACCCCCAGATGCCCCAGTACACTTCCCCTCAGCCTGGCTCGGCCTTATCCCCACGTCAGCCGTCTGGAGGACAGATG--------|-GTGGGCTCCTACCAGCAGAACTCCATTAGGGGAGCTACGGCCCCCAGGGCAGTCAGTATGGCCCACAAGGTAAGTGTGCTACCCCTTTAGAAGGAAAGAGAGGTACTGTGTTAACGGCTG
Arid1a	Del 0|1	0	0	24.2646	0	11.0089	24.8393	0	0	32.1214	0	0	0	0	25.0546	0	37.5616	0	0	0	9.83672	0	0	26.4754	19.6612	32.321	30.3914	TATGCAGAGGAACCCCCAGATGCCCCAGTACACTTCCCCTCAGCCTGGCTCGGCCTTATCCCCACGTCAGCCGTCTGGAGGACAGATGCACTCGGG|-GTGGGCTCCTACCAGCAGAACTCCATTAGGGGAGCTACGGCCCCCAGGGCAGTCAGTATGGCCCACAAGGTAAGTGTGCTACCCCTTTAGAAGGAAAGAGAGGTACTGTGTTAACGGCTG
Arid1a	Del 21|9	0	0	0	36.6666	0	0	0	0	0	0	0	0	0	0	0	0	0	0	0	0	0	0	0	0	0	0	TATGCAGAGGAACCCCCAGATGCCCCAGTACACTTCCCCTCAGCCTGGCTCGGCCTTATCCCCACGTCAGCCGTCT---------------------|---------CTACCAGCAGAACTCCATTAGGGGAGCTACGGCCCCCAGGGCAGTCAGTATGGCCCACAAGGTAAGTGTGCTACCCCTTTAGAAGGAAAGAGAGGTACTGTGTTAACGGCTG
Arid1a	Del 8|0	0	0	0	36.6268	0	0	0	0	0	0	0	0	0	0	0	0	0	0	0	0	0	0	0	0	0	0	TATGCAGAGGAACCCCCAGATGCCCCAGTACACTTCCCCTCAGCCTGGCTCGGCCTTATCCCCACGTCAGCCGTCTGGAGGACAGATG--------|CGTGGGCTCCTACCAGCAGAACTCCATTAGGGGAGCTACGGCCCCCAGGGCAGTCAGTATGGCCCACAAGGTAAGTGTGCTACCCCTTTAGAAGGAAAGAGAGGTACTGTGTTAACGGCTG
Arid1a	Del 5|0	0	0	0	0	0	26.6761	0	0	0	0	0	0	0	0	0	0	0	0	0	0	0	0	0	0	0	0	TATGCAGAGGAACCCCCAGATGCCCCAGTACACTTCCCCTCAGCCTGGCTCGGCCTTATCCCCACGTCAGCCGTCTGGAGGACAGATGCAC-----|CGTGGGCTCCTACCAGCAGAACTCCATTAGGGGAGCTACGGCCCCCAGGGCAGTCAGTATGGCCCACAAGGTAAGTGTGCTACCCCTTTAGAAGGAAAGAGAGGTACTGTGTTAACGGCTG
Arid1a	Del 3|0	0	0	0	0	0	0	0	15.9676	0	0	0	0	0	0	0	0	0	0	0	0	0	0	0	0	0	0	TATGCAGAGGAACCCCCAGATGCCCCAGTACACTTCCCCTCAGCCTGGCTCGGCCTTATCCCCACGTCAGCCGTCTGGAGGACAGATGCACTC---|CGTGGGCTCCTACCAGCAGAACTCCATTAGGGGAGCTACGGCCCCCAGGGCAGTCAGTATGGCCCACAAGGTAAGTGTGCTACCCCTTTAGAAGGAAAGAGAGGTACTGTGTTAACGGCTG
Arid1a	Del 0|5	0	0	0	0	0	0	0	15.6292	0	0	0	0	0	0	0	0	0	0	0	0	0	0	0	0	0	0	TATGCAGAGGAACCCCCAGATGCCCCAGTACACTTCCCCTCAGCCTGGCTCGGCCTTATCCCCACGTCAGCCGTCTGGAGGACAGATGCACTCGGG|-----GCTCCTACCAGCAGAACTCCATTAGGGGAGCTACGGCCCCCAGGGCAGTCAGTATGGCCCACAAGGTAAGTGTGCTACCCCTTTAGAAGGAAAGAGAGGTACTGTGTTAACGGCTG
Arid1a	Del 0|4	0	0	0	0	0	0	0	0	30.0161	0	0	0	0	0	0	0	0	0	0	0	0	0	0	0	0	0	TATGCAGAGGAACCCCCAGATGCCCCAGTACACTTCCCCTCAGCCTGGCTCGGCCTTATCCCCACGTCAGCCGTCTGGAGGACAGATGCACTCGGG|----GGCTCCTACCAGCAGAACTCCATTAGGGGAGCTACGGCCCCCAGGGCAGTCAGTATGGCCCACAAGGTAAGTGTGCTACCCCTTTAGAAGGAAAGAGAGGTACTGTGTTAACGGCTG
Arid1a	Del 4|0	0	0	0	0	0	0	0	0	0	25.5643	0	0	0	0	0	0	37.6987	0	0	0	0	0	0	0	0	0	TATGCAGAGGAACCCCCAGATGCCCCAGTACACTTCCCCTCAGCCTGGCTCGGCCTTATCCCCACGTCAGCCGTCTGGAGGACAGATGCACT----|CGTGGGCTCCTACCAGCAGAACTCCATTAGGGGAGCTACGGCCCCCAGGGCAGTCAGTATGGCCCACAAGGTAAGTGTGCTACCCCTTTAGAAGGAAAGAGAGGTACTGTGTTAACGGCTG
Arid1a	Del 30|0	0	0	0	0	0	0	0	0	0	23.3678	0	0	0	0	0	0	0	0	0	0	0	0	0	0	0	0	TATGCAGAGGAACCCCCAGATGCCCCAGTACACTTCCCCTCAGCCTGGCTCGGCCTTATCCCCACG------------------------------|CGTGGGCTCCTACCAGCAGAACTCCATTAGGGGAGCTACGGCCCCCAGGGCAGTCAGTATGGCCCACAAGGTAAGTGTGCTACCCCTTTAGAAGGAAAGAGAGGTACTGTGTTAACGGCTG
Arid1a	Del 18|0	0	0	0	0	0	0	0	0	0	0	18.1109	0	0	0	0	0	0	0	0	0	0	0	0	0	0	0	TATGCAGAGGAACCCCCAGATGCCCCAGTACACTTCCCCTCAGCCTGGCTCGGCCTTATCCCCACGTCAGCCGTCTGG------------------|CGTGGGCTCCTACCAGCAGAACTCCATTAGGGGAGCTACGGCCCCCAGGGCAGTCAGTATGGCCCACAAGGTAAGTGTGCTACCCCTTTAGAAGGAAAGAGAGGTACTGTGTTAACGGCTG
Arid1a	Del 12|0	0	0	0	0	0	0	0	0	0	0	0	0	0	0	0	39.5688	0	0	0	0	0	0	0	0	0	0	TATGCAGAGGAACCCCCAGATGCCCCAGTACACTTCCCCTCAGCCTGGCTCGGCCTTATCCCCACGTCAGCCGTCTGGAGGACA------------|CGTGGGCTCCTACCAGCAGAACTCCATTAGGGGAGCTACGGCCCCCAGGGCAGTCAGTATGGCCCACAAGGTAAGTGTGCTACCCCTTTAGAAGGAAAGAGAGGTACTGTGTTAACGGCTG
Arid1a	Del 18|0	0	0	0	0	0	0	0	0	0	0	0	0	0	0	0	0	0	0	11.9126	0	0	0	0	0	0	0	TATGCAGAGGAACCCCCAGATGCCCCAGTACACTTCCCCTCAGCCTGGCTCGGCCTTATCCCCACGTCAGCCGTCTG------------------A|CGTGGGCTCCTACCAGCAGAACTCCATTAGGGGAGCTACGGCCCCCAGGGCAGTCAGTATGGCCCACAAGGTAAGTGTGCTACCCCTTTAGAAGGAAAGAGAGGTACTGTGTTAACGGCTG
Arid1a	Del 8|4	0	0	0	0	0	0	0	0	0	0	0	0	0	0	0	0	0	0	0	0	0	0	9.30647	6.22084	5.82914	6.09368	TATGCAGAGGAACCCCCAGATGCCCCAGTACACTTCCCCTCAGCCTGGCTCGGCCTTATCCCCACGTCAGCCGTCTGGAGGACAGATG--------|----GGCTCCTACCAGCAGAACTCCATTAGGGGAGCTACGGCCCCCAGGGCAGTCAGTATGGCCCACAAGGTAAGTGTGCTACCCCTTTAGAAGGAAAGAGAGGTACTGTGTTAACGGCTG
Arid1b	WT	22.996	57.0817	50.6796	17.4667	83.0916	64.5668	59.2675	50.4086	31.7823	30.5107	65.3093	100	91.548	73.3275	66.8767	32.2778	60.0371	54.3669	66.4846	60.2058	57.1038	100	70.4709	72.5042	63.4388	63.6024	CTTGGGCAAGGACCTAGGCGCCCAGTACGCCGCTGCCAGCCCGGCCTGGGCGGCCGCGCAACAAAGGAGTCACCCGGCGATGAGCCCCGGCACCCCCG|GACCGACCATGGGCAGATCCCAGGTAACCCCCGCGCCCGGCCGGGCCTGCTTCCGCCCGGGCCTCGCGCCGCGAGCCCGACTTTCTTTCTTCGCCGGGTACTTTTCCCGGCGGTTG
Arid1b	Del 1|0	77.004	42.9183	0	38.1411	0	0	22.0403	49.5914	68.2177	42.7602	26.0889	0	8.45203	26.6725	33.1233	48.338	39.9629	21.1288	21.6654	30.4427	18.1818	0	29.5291	27.4958	36.5612	36.3976	CTTGGGCAAGGACCTAGGCGCCCAGTACGCCGCTGCCAGCCCGGCCTGGGCGGCCGCGCAACAAAGGAGTCACCCGGCGATGAGCCCCGGCACCCCC-|GACCGACCATGGGCAGATCCCAGGTAACCCCCGCGCCCGGCCGGGCCTGCTTCCGCCCGGGCCTCGCGCCGCGAGCCCGACTTTCTTTCTTCGCCGGGTACTTTTCCCGGCGGTTG
Arid1b	Del 2|4	0	0	24.7087	0	0	0	0	0	0	0	0	0	0	0	0	0	0	0	0	0	0	0	0	0	0	0	CTTGGGCAAGGACCTAGGCGCCCAGTACGCCGCTGCCAGCCCGGCCTGGGCGGCCGCGCAACAAAGGAGTCACCCGGCGATGAGCCCCGGCACCCC--|----GACCATGGGCAGATCCCAGGTAACCCCCGCGCCCGGCCGGGCCTGCTTCCGCCCGGGCCTCGCGCCGCGAGCCCGACTTTCTTTCTTCGCCGGGTACTTTTCCCGGCGGTTG
Arid1b	Del 0|5	0	0	24.6117	0	0	35.4332	11.2186	0	0	0	0	0	0	0	0	0	0	0	0	0	11.1153	0	0	0	0	0	CTTGGGCAAGGACCTAGGCGCCCAGTACGCCGCTGCCAGCCCGGCCTGGGCGGCCGCGCAACAAAGGAGTCACCCGGCGATGAGCCCCGGCACCCCCG|-----ACCATGGGCAGATCCCAGGTAACCCCCGCGCCCGGCCGGGCCTGCTTCCGCCCGGGCCTCGCGCCGCGAGCCCGACTTTCTTTCTTCGCCGGGTACTTTTCCCGGCGGTTG
Arid1b	Del 5|0	0	0	0	44.3922	0	0	0	0	0	0	0	0	0	0	0	0	0	0	0	0	0	0	0	0	0	0	CTTGGGCAAGGACCTAGGCGCCCAGTACGCCGCTGCCAGCCCGGCCTGGGCGGCCGCGCAACAAAGGAGTCACCCGGCGATGAGCCCCGGCAC-----|GACCGACCATGGGCAGATCCCAGGTAACCCCCGCGCCCGGCCGGGCCTGCTTCCGCCCGGGCCTCGCGCCGCGAGCCCGACTTTCTTTCTTCGCCGGGTACTTTTCCCGGCGGTTG
Arid1b	Del 4|4	0	0	0	0	9.08645	0	0	0	0	0	0	0	0	0	0	0	0	0	0	0	0	0	0	0	0	0	CTTGGGCAAGGACCTAGGCGCCCAGTACGCCGCTGCCAGCCCGGCCTGGGCGGCCGCGCAACAAAGGAGTCACCCGGCGATGAGCCCCGGCACC----|----GACCATGGGCAGATCCCAGGTAACCCCCGCGCCCGGCCGGGCCTGCTTCCGCCCGGGCCTCGCGCCGCGAGCCCGACTTTCTTTCTTCGCCGGGTACTTTTCCCGGCGGTTG
Arid1b	Del 16|11	0	0	0	0	7.822	0	0	0	0	0	0	0	0	0	0	0	0	0	0	0	0	0	0	0	0	0	CTTGGGCAAGGACCTAGGCGCCCAGTACGCCGCTGCCAGCCCGGCCTGGGCGGCCGCGCAACAAAGGAGTCACCCGGCGATG----------------|-----------GGCAGATCCCAGGTAACCCCCGCGCCCGGCCGGGCCTGCTTCCGCCCGGGCCTCGCGCCGCGAGCCCGACTTTCTTTCTTCGCCGGGTACTTTTCCCGGCGGTTG
Arid1b	Del 1|8	0	0	0	0	0	0	7.47354	0	0	0	0	0	0	0	0	0	0	0	0	0	0	0	0	0	0	0	CTTGGGCAAGGACCTAGGCGCCCAGTACGCCGCTGCCAGCCCGGCCTGGGCGGCCGCGCAACAAAGGAGTCACCCGGCGATGAGCCCCGGCACCCCC-|--------ATGGGCAGATCCCAGGTAACCCCCGCGCCCGGCCGGGCCTGCTTCCGCCCGGGCCTCGCGCCGCGAGCCCGACTTTCTTTCTTCGCCGGGTACTTTTCCCGGCGGTTG
Arid1b	Del 0|2	0	0	0	0	0	0	0	0	0	26.7292	0	0	0	0	0	0	0	0	0	0	0	0	0	0	0	0	CTTGGGCAAGGACCTAGGCGCCCAGTACGCCGCTGCCAGCCCGGCCTGGGCGGCCGCGCAACAAAGGAGTCACCCGGCGATGAGCCCCGGCACCCCCG|--CCGACCATGGGCAGATCCCAGGTAACCCCCGCGCCCGGCCGGGCCTGCTTCCGCCCGGGCCTCGCGCCGCGAGCCCGACTTTCTTTCTTCGCCGGGTACTTTTCCCGGCGGTTG
Arid1b	Del 4|21	0	0	0	0	0	0	0	0	0	0	8.60176	0	0	0	0	0	0	0	0	0	0	0	0	0	0	0	CTTGGGCAAGGACCTAGGCGCCCAGTACGCCGCTGCCAGCCCGGCCTGGGCGGCCGCGCAACAAAGGAGTCACCCGGCGATGAGCCCCGGCACCCCC-|---------------------AGGTAACCCCCGCGCCCGGCCGGGCCTGCTTCCGCCCGGGCCTCGCGCCGCGAGCCCGACTTTCTTTCTTCGCCGGGTACTTTTCCCGGCGGTTG
Arid1b	Del 1|20	0	0	0	0	0	0	0	0	0	0	0	0	0	0	0	19.3842	0	0	0	0	0	0	0	0	0	0	CTTGGGCAAGGACCTAGGCGCCCAGTACGCCGCTGCCAGCCCGGCCTGGGCGGCCGCGCAACAAAGGAGTCACCCGGCGATGAGCCCCGGCACCCCCG|--------------------AGGTAACCCCCGCGCCCGGCCGGGCCTGCTTCCGCCCGGGCCTCGCGCCGCGAGCCCGACTTTCTTTCTTCGCCGGGTACTTTTCCCGGCGGTTG
Arid1b	Del 44|4	0	0	0	0	0	0	0	0	0	0	0	0	0	0	0	0	0	13.7882	0	0	0	0	0	0	0	0	CTTGGGCAAGGACCTAGGCGCCCAGTACGCCGCTGCCAGCCCGGCCTGGGCGGC--------------------------------------------|----GACCATGGGCAGATCCCAGGTAACCCCCGCGCCCGGCCGGGCCTGCTTCCGCCCGGGCCTCGCGCCGCGAGCCCGACTTTCTTTCTTCGCCGGGTACTTTTCCCGGCGGTTG
Arid1b	Del 3|0	0	0	0	0	0	0	0	0	0	0	0	0	0	0	0	0	0	10.7162	0	0	0	0	0	0	0	0	CTTGGGCAAGGACCTAGGCGCCCAGTACGCCGCTGCCAGCCCGGCCTGGGCGGCCGCGCAACAAAGGAGTCACCCGGCGATGAGCCCCGGCACCC---|GACCGACCATGGGCAGATCCCAGGTAACCCCCGCGCCCGGCCGGGCCTGCTTCCGCCCGGGCCTCGCGCCGCGAGCCCGACTTTCTTTCTTCGCCGGGTACTTTTCCCGGCGGTTG
Arid1b	Del 10|8	0	0	0	0	0	0	0	0	0	0	0	0	0	0	0	0	0	0	11.85	0	0	0	0	0	0	0	CTTGGGCAAGGACCTAGGCGCCCAGTACGCCGCTGCCAGCCCGGCCTGGGCGGCCGCGCAACAAAGGAGTCACCCGGCGATGAGCCCC----------|--------ATGGGCAGATCCCAGGTAACCCCCGCGCCCGGCCGGGCCTGCTTCCGCCCGGGCCTCGCGCCGCGAGCCCGACTTTCTTTCTTCGCCGGGTACTTTTCCCGGCGGTTG
Arid1b	Del 20|14	0	0	0	0	0	0	0	0	0	0	0	0	0	0	0	0	0	0	0	9.35146	0	0	0	0	0	0	CTTGGGCAAGGACCTAGGCGCCCAGTACGCCGCTGCCAGCCCGGCCTGGGCGGCCGCGCAACAAAGGAGTCACCCGGC--------------------|--------------AGATCCCAGGTAACCCCCGCGCCCGGCCGGGCCTGCTTCCGCCCGGGCCTCGCGCCGCGAGCCCGACTTTCTTTCTTCGCCGGGTACTTTTCCCGGCGGTTG
Arid1b	Del 0|4	0	0	0	0	0	0	0	0	0	0	0	0	0	0	0	0	0	0	0	0	8.42027	0	0	0	0	0	CTTGGGCAAGGACCTAGGCGCCCAGTACGCCGCTGCCAGCCCGGCCTGGGCGGCCGCGCAACAAAGGAGTCACCCGGCGATGAGCCCCGGCACCCCCG|----GACCATGGGCAGATCCCAGGTAACCCCCGCGCCCGGCCGGGCCTGCTTCCGCCCGGGCCTCGCGCCGCGAGCCCGACTTTCTTTCTTCGCCGGGTACTTTTCCCGGCGGTTG
Arid1b	Del 1|2	0	0	0	0	0	0	0	0	0	0	0	0	0	0	0	0	0	0	0	0	5.17884	0	0	0	0	0	CTTGGGCAAGGACCTAGGCGCCCAGTACGCCGCTGCCAGCCCGGCCTGGGCGGCCGCGCAACAAAGGAGTCACCCGGCGATGAGCCCCGGCACCCCC-|--CCGACCATGGGCAGATCCCAGGTAACCCCCGCGCCCGGCCGGGCCTGCTTCCGCCCGGGCCTCGCGCCGCGAGCCCGACTTTCTTTCTTCGCCGGGTACTTTTCCCGGCGGTTG
Arid2	WT	24.5965	84.725	47.2422	63.5596	77.1867	100	83.56	86.5633	74.731	49.1778	85.0854	100	37.6803	59.7423	60.5515	100	24.0688	100	89.8274	100	68.1769	78.6943	90.1596	91.5141	89.0709	88.054	CAGCTTAACATAGGGCTTCCTGTGGTATATAATGTCTTTATTCCTCTCTCTCTCTCTTTTAGGCTAAATGCTCATTTTGAAGTAAATCCAGAC|TGTTCCGTCTCTCGGGCAGAAATGTATTCAGAGTACCTCTCAACTTGCAGTAAATTAGCTCGCGGTGGCATCCTCACATCAACTGGGTTTTATAAGTGTCTTAGGTAACTCGCACAGCTC
Arid2	Del 2|24	34.3136	0	0	0	0	0	0	0	0	0	0	0	0	0	0	0	0	0	0	0	0	0	0	0	0	0	CAGCTTAACATAGGGCTTCCTGTGGTATATAATGTCTTTATTCCTCTCTCTCTCTCTTTTAGGCTAAATGCTCATTTTGAAGTAAATCCAG-- | ------------------------TATTCAGAGTACCTCTCAACTTGCAGTAAATTAGCTCGCGGTGGCATCCTCACATCAACTGGGTTTTATAAGTGTCTTAGGTAACTCGCACAGCTC
Arid2	Del 2|11	33.2551	0	0	0	0	0	0	0	0	0	0	0	0	0	0	0	0	0	0	0	0	0	0	0	0	0	CAGCTTAACATAGGGCTTCCTGTGGTATATAATGTCTTTATTCCTCTCTCTCTCTCTTTTAGGCTAAATGCTCATTTTGAAGTAAATCCAG-- | -----------TCGGGCAGAAATGTATTCAGAGTACCTCTCAACTTGCAGTAAATTAGCTCGCGGTGGCATCCTCACATCAACTGGGTTTTATAAGTGTCTTAGGTAACTCGCACAGCTC
Arid2	Del 0|4 (D5 I1T)	7.83481	0	0	0	0	0	0	0	0	0	0	0	0	0	0	0	0	0	0	0	0	0	0	0	0	0	CAGCTTAACATAGGGCTTCCTGTGGTATATAATGTCTTTATTCCTCTCTCTCTCTCTTTTAGGCTAAATGCTCATTTTGAAGTAAATCCAGAC|T----CGTCTCTCGGGCAGAAATGTATTCAGAGTACCTCTCAACTTGCAGTAAATTAGCTCGCGGTGGCATCCTCACATCAACTGGGTTTTATAAGTGTCTTAGGTAACTCGCACAGCTC
Arid2	Ins 1 T	0	8.82827	25.3003	0	0	0	16.44	0	0	26.0791	14.9146	0	0	18.2491	0	0	37.8935	0	10.1726	0	0	0	0	0	0	0	CAGCTTAACATAGGGCTTCCTGTGGTATATAATGTCTTTATTCCTCTCTCTCTCTCTTTTAGGCTAAATGCTCATTTTGAAGTAAATCCAGAC|{T}TGTTCCGTCTCTCGGGCAGAAATGTATTCAGAGTACCTCTCAACTTGCAGTAAATTAGCTCGCGGTGGCATCCTCACATCAACTGGGTTTTATAAGTGTCTTAGGTAACTCGCACAGCTC
Arid2	Del 20|11	0	6.44673	0	0	0	0	0	0	0	0	0	0	0	0	0	0	0	0	0	0	0	0	0	0	0	0	CAGCTTAACATAGGGCTTCCTGTGGTATATAATGTCTTTATTCCTCTCTCTCTCTCTTTTAGGCTAAATGCTC--------------------|-----------TCGGGCAGAAATGTATTCAGAGTACCTCTCAACTTGCAGTAAATTAGCTCGCGGTGGCATCCTCACATCAACTGGGTTTTATAAGTGTCTTAGGTAACTCGCACAGCTC
Arid2	Del 0|1	0	0	27.4574	36.4404	0	0	0	0	0	0	0	0	0	0	0	0	0	0	0	0	0	0	0	0	0	0	CAGCTTAACATAGGGCTTCCTGTGGTATATAATGTCTTTATTCCTCTCTCTCTCTCTTTTAGGCTAAATGCTCATTTTGAAGTAAATCCAGAC|-GTTCCGTCTCTCGGGCAGAAATGTATTCAGAGTACCTCTCAACTTGCAGTAAATTAGCTCGCGGTGGCATCCTCACATCAACTGGGTTTTATAAGTGTCTTAGGTAACTCGCACAGCTC
Arid2	Del 0|2	0	0	0	0	11.7189	0	0	0	0	0	0	0	46.2404	0	15.7254	0	0	0	0	0	17.2429	21.3057	9.8404	8.48589	10.9291	11.946	CAGCTTAACATAGGGCTTCCTGTGGTATATAATGTCTTTATTCCTCTCTCTCTCTCTTTTAGGCTAAATGCTCATTTTGAAGTAAATCCAGAC|--TTCCGTCTCTCGGGCAGAAATGTATTCAGAGTACCTCTCAACTTGCAGTAAATTAGCTCGCGGTGGCATCCTCACATCAACTGGGTTTTATAAGTGTCTTAGGTAACTCGCACAGCTC
Arid2	Del 0|7	0	0	0	0	11.0944	0	0	0	0	0	0	0	0	0	0	0	0	0	0	0	0	0	0	0	0	0	CAGCTTAACATAGGGCTTCCTGTGGTATATAATGTCTTTATTCCTCTCTCTCTCTCTTTTAGGCTAAATGCTCATTTTGAAGTAAATCCAGAC|-------TCTCTCGGGCAGAAATGTATTCAGAGTACCTCTCAACTTGCAGTAAATTAGCTCGCGGTGGCATCCTCACATCAACTGGGTTTTATAAGTGTCTTAGGTAACTCGCACAGCTC
Arid2	Del 0|4	0	0	0	0	0	0	0	13.4367	0	0	0	0	0	0	0	0	0	0	0	0	0	0	0	0	0	0	CAGCTTAACATAGGGCTTCCTGTGGTATATAATGTCTTTATTCCTCTCTCTCTCTCTTTTAGGCTAAATGCTCATTTTGAAGTAAATCCAGAC|----CCGTCTCTCGGGCAGAAATGTATTCAGAGTACCTCTCAACTTGCAGTAAATTAGCTCGCGGTGGCATCCTCACATCAACTGGGTTTTATAAGTGTCTTAGGTAACTCGCACAGCTC
Arid2	Del 17|10	0	0	0	0	0	0	0	0	25.269	0	0	0	0	0	0	0	0	0	0	0	0	0	0	0	0	0	CAGCTTAACATAGGGCTTCCTGTGGTATATAATGTCTTTATTCCTCTCTCTCTCTCTTTTAGGCTAAATGCTCATT-----------------|----------CTCGGGCAGAAATGTATTCAGAGTACCTCTCAACTTGCAGTAAATTAGCTCGCGGTGGCATCCTCACATCAACTGGGTTTTATAAGTGTCTTAGGTAACTCGCACAGCTC
Arid2	Del 2|2	0	0	0	0	0	0	0	0	0	24.7431	0	0	0	0	23.7231	0	0	0	0	0	0	0	0	0	0	0	CAGCTTAACATAGGGCTTCCTGTGGTATATAATGTCTTTATTCCTCTCTCTCTCTCTTTTAGGCTAAATGCTCATTTTGAAGTAAATCCAG--|--TTCCGTCTCTCGGGCAGAAATGTATTCAGAGTACCTCTCAACTTGCAGTAAATTAGCTCGCGGTGGCATCCTCACATCAACTGGGTTTTATAAGTGTCTTAGGTAACTCGCACAGCTC
Arid2	Del 6|3	0	0	0	0	0	0	0	0	0	0	0	0	16.0793	0	0	0	0	0	0	0	0	0	0	0	0	0	CAGCTTAACATAGGGCTTCCTGTGGTATATAATGTCTTTATTCCTCTCTCTCTCTCTTTTAGGCTAAATGCTCATTTTGAAGTAAAT------|---TCCGTCTCTCGGGCAGAAATGTATTCAGAGTACCTCTCAACTTGCAGTAAATTAGCTCGCGGTGGCATCCTCACATCAACTGGGTTTTATAAGTGTCTTAGGTAACTCGCACAGCTC
Arid2	Ins 1 G	0	0	0	0	0	0	0	0	0	0	0	0	0	22.0087	0	0	0	0	0	0	0	0	0	0	0	0	CAGCTTAACATAGGGCTTCCTGTGGTATATAATGTCTTTATTCCTCTCTCTCTCTCTTTTAGGCTAAATGCTCATTTTGAAGTAAATCCAGAC|{G}TGTTCCGTCTCTCGGGCAGAAATGTATTCAGAGTACCTCTCAACTTGCAGTAAATTAGCTCGCGGTGGCATCCTCACATCAACTGGGTTTTATAAGTGTCTTAGGTAACTCGCACAGCTC
Arid2	Del 2|0	0	0	0	0	0	0	0	0	0	0	0	0	0	0	0	0	38.0377	0	0	0	0	0	0	0	0	0	CAGCTTAACATAGGGCTTCCTGTGGTATATAATGTCTTTATTCCTCTCTCTCTCTCTTTTAGGCTAAATGCTCATTTTGAAGTAAATCCAG--|TGTTCCGTCTCTCGGGCAGAAATGTATTCAGAGTACCTCTCAACTTGCAGTAAATTAGCTCGCGGTGGCATCCTCACATCAACTGGGTTTTATAAGTGTCTTAGGTAACTCGCACAGCTC
Arid2	Del 0|5	0	0	0	0	0	0	0	0	0	0	0	0	0	0	0	0	0	0	0	0	14.5802	0	0	0	0	0	CAGCTTAACATAGGGCTTCCTGTGGTATATAATGTCTTTATTCCTCTCTCTCTCTCTTTTAGGCTAAATGCTCATTTTGAAGTAAATCCAGAC|-----CGTCTCTCGGGCAGAAATGTATTCAGAGTACCTCTCAACTTGCAGTAAATTAGCTCGCGGTGGCATCCTCACATCAACTGGGTTTTATAAGTGTCTTAGGTAACTCGCACAGCTC
Atm	WT	40.224	89.5605	100	100	100	100	69.0762	87.6018	67.4568	100	68.4868	66.1593	100	87.4972	80.6329	62.7093	62.7316	100	100	100	68.9858	100	100	100	100	100	TCTGTCATTCATTGGTGAAGAAATCAAAGTAGAAAAACATTGAGCGACTGCTCTAAAGTCCTATTATTCCCATTTTCTTAAACATCATGTTTTTCCTTTCTGCAGGTTTTAGAGAAAGTCTCCGAATC|GTTTGGATGTAGAAGTTTAGAAGACTTCATGATTTCTCACCTAGACTACCTGGTTTTGGAATGGCTGAACCTTCAAGATACTG
Atm	Ins 1 C	59.776	0	0	0	0	0	0	0	0	0	0	0	0	0	0	0	0	0	0	0	0	0	0	0	0	0	TCTGTCATTCATTGGTGAAGAAATCAAAGTAGAAAAACATTGAGCGACTGCTCTAAAGTCCTATTATTCCCATTTTCTTAAACATCATGTTTTTCCTTTCTGCAGGTTTTAGAGAAAGTCTCCGAATC{C}|GTTTGGATGTAGAAGTTTAGAAGACTTCATGATTTCTCACCTAGACTACCTGGTTTTGGAATGGCTGAACCTTCAAGATACTG
Atm	Del 4|0 Ins 1G	0	10.4395	0	0	0	0	0	0	0	0	0	0	0	0	0	0	0	0	0	0	0	0	0	0	0	0	TCTGTCATTCATTGGTGAAGAAATCAAAGTAGAAAAACATTGAGCGACTGCTCTAAAGTCCTATTATTCCCATTTTCTTAAACATCATGTTTTTCCTTTCTGCAGGTTTTAGAGAAAGTCTCCG----{G}|GTTTGGATGTAGAAGTTTAGAAGACTTCATGATTTCTCACCTAGACTACCTGGTTTTGGAATGGCTGAACCTTCAAGATACTG
Atm	Del 1|0	0	0	0	0	0	0	15.8234	0	32.5432	0	15.7713	0	0	0	0	0	0	0	0	0	0	0	0	0	0	0	TCTGTCATTCATTGGTGAAGAAATCAAAGTAGAAAAACATTGAGCGACTGCTCTAAAGTCCTATTATTCCCATTTTCTTAAACATCATGTTTTTCCTTTCTGCAGGTTTTAGAGAAAGTCTCCGAAT-|GTTTGGATGTAGAAGTTTAGAAGACTTCATGATTTCTCACCTAGACTACCTGGTTTTGGAATGGCTGAACCTTCAAGATACTG
Atm	Del 15|21	0	0	0	0	0	0	15.1004	0	0	0	0	0	0	0	0	0	0	0	0	0	0	0	0	0	0	0	TCTGTCATTCATTGGTGAAGAAATCAAAGTAGAAAAACATTGAGCGACTGCTCTAAAGTCCTATTATTCCCATTTTCTTAAACATCATGTTTTTCCTTTCTGCAGGTTTTAGA---------------|---------------------AGACTTCATGATTTCTCACCTAGACTACCTGGTTTTGGAATGGCTGAACCTTCAAGATACTG
Atm	Del 0|3	0	0	0	0	0	0	0	12.3982	0	0	0	0	0	0	0	0	0	0	0	0	16.5157	0	0	0	0	0	TCTGTCATTCATTGGTGAAGAAATCAAAGTAGAAAAACATTGAGCGACTGCTCTAAAGTCCTATTATTCCCATTTTCTTAAACATCATGTTTTTCCTTTCTGCAGGTTTTAGAGAAAGTCTCCGAATC|---TGGATGTAGAAGTTTAGAAGACTTCATGATTTCTCACCTAGACTACCTGGTTTTGGAATGGCTGAACCTTCAAGATACTG
Atm	Del 5|0	0	0	0	0	0	0	0	0	0	0	15.7419	0	0	0	0	0	0	0	0	0	0	0	0	0	0	0	TCTGTCATTCATTGGTGAAGAAATCAAAGTAGAAAAACATTGAGCGACTGCTCTAAAGTCCTATTATTCCCATTTTCTTAAACATCATGTTTTTCCTTTCTGCAGGTTTTAGAGAAAGTCTCC-----|GTTTGGATGTAGAAGTTTAGAAGACTTCATGATTTCTCACCTAGACTACCTGGTTTTGGAATGGCTGAACCTTCAAGATACTG
Atm	Del 4|0	0	0	0	0	0	0	0	0	0	0	0	33.8407	0	0	19.3671	0	0	0	0	0	0	0	0	0	0	0	TCTGTCATTCATTGGTGAAGAAATCAAAGTAGAAAAACATTGAGCGACTGCTCTAAAGTCCTATTATTCCCATTTTCTTAAACATCATGTTTTTCCTTTCTGCAGGTTTTAGAGAAAGTCTCCG----|GTTTGGATGTAGAAGTTTAGAAGACTTCATGATTTCTCACCTAGACTACCTGGTTTTGGAATGGCTGAACCTTCAAGATACTG
Atm	Del 0|6	0	0	0	0	0	0	0	0	0	0	0	0	0	12.5028	0	0	0	0	0	0	0	0	0	0	0	0	TCTGTCATTCATTGGTGAAGAAATCAAAGTAGAAAAACATTGAGCGACTGCTCTAAAGTCCTATTATTCCCATTTTCTTAAACATCATGTTTTTCCTTTCTGCAGGTTTTAGAGAAAGTCTCCGAATC|------ATGTAGAAGTTTAGAAGACTTCATGATTTCTCACCTAGACTACCTGGTTTTGGAATGGCTGAACCTTCAAGATACTG
Atm	Del 9|4	0	0	0	0	0	0	0	0	0	0	0	0	0	0	0	37.2907	0	0	0	0	0	0	0	0	0	0	TCTGTCATTCATTGGTGAAGAAATCAAAGTAGAAAAACATTGAGCGACTGCTCTAAAGTCCTATTATTCCCATTTTCTTAAACATCATGTTTTTCCTTTCTGCAGGTTTTAGAGAAAGT---------|----GGATGTAGAAGTTTAGAAGACTTCATGATTTCTCACCTAGACTACCTGGTTTTGGAATGGCTGAACCTTCAAGATACTG
Atm	Del 0|4	0	0	0	0	0	0	0	0	0	0	0	0	0	0	0	0	37.2684	0	0	0	14.4985	0	0	0	0	0	TCTGTCATTCATTGGTGAAGAAATCAAAGTAGAAAAACATTGAGCGACTGCTCTAAAGTCCTATTATTCCCATTTTCTTAAACATCATGTTTTTCCTTTCTGCAGGTTTTAGAGAAAGTCTCCGAATC|----GGATGTAGAAGTTTAGAAGACTTCATGATTTCTCACCTAGACTACCTGGTTTTGGAATGGCTGAACCTTCAAGATACTG
Axin1	WT	36.3197	52.3408	49.9522	41.1249	100	47.883	81.0444	63.7196	67.5302	100	83.0369	65.1749	11.7264	81.4547	63.7224	21.8708	100	34.1716	100	57.119	67.2738	76.4878	55.6214	66.4236	54.7352	51.0958	GTTCTGAGGCCCGTCATCTGGTCCCTGCCTCAGCCAATAGGCGGCAGGAGCCCGAGCTGCAGCCTAGAGTCACGCTTCTGCCTCCCAGCCACACAGTGGCCAAGAGCAGG|GACCGGCTTCCTAGAGTGGCTGAAAGTGCTCGGACGGACAGCCAAGCCCATCATGGCGGACAGCGGGACAGTGGGTCGTGATCAGGCACTTGGAGCCAGGCAGGTGAGGTAA
Axin1	Del 54|5	63.6803	0	0	0	0	0	0	0	0	0	0	0	0	0	0	0	0	0	0	0	0	0	0	0	0	0	GTTCTGAGGCCCGTCATCTGGTCCCTGCCTCAGCCAATAGGCGGCAGGAGCCCGAG------------------------------------------------------|-----GCTTCCTAGAGTGGCTGAAAGTGCTCGGACGGACAGCCAAGCCCATCATGGCGGACAGCGGGACAGTGGGTCGTGATCAGGCACTTGGAGCCAGGCAGGTGAGGTAA
Axin1	Del 1|0	0	30.7984	26.0752	0	0	0	0	18.5224	32.4698	0	0	34.8251	88.2736	0	36.2776	0	0	50.1655	0	30.4304	20.2429	23.5122	34.5932	26.1722	36.037	37.3308	GTTCTGAGGCCCGTCATCTGGTCCCTGCCTCAGCCAATAGGCGGCAGGAGCCCGAGCTGCAGCCTAGAGTCACGCTTCTGCCTCCCAGCCACACAGTGGCCAAGAGCAG-|GACCGGCTTCCTAGAGTGGCTGAAAGTGCTCGGACGGACAGCCAAGCCCATCATGGCGGACAGCGGGACAGTGGGTCGTGATCAGGCACTTGGAGCCAGGCAGGTGAGGTAA
Axin1	Del 4|0	0	8.53769	0	0	0	25.0074	0	0	0	0	0	0	0	0	0	0	0	0	0	0	0	0	9.78542	7.40423	9.22781	11.5734	GTTCTGAGGCCCGTCATCTGGTCCCTGCCTCAGCCAATAGGCGGCAGGAGCCCGAGCTGCAGCCTAGAGTCACGCTTCTGCCTCCCAGCCACACAGTGGCCAAGAG----|GACCGGCTTCCTAGAGTGGCTGAAAGTGCTCGGACGGACAGCCAAGCCCATCATGGCGGACAGCGGGACAGTGGGTCGTGATCAGGCACTTGGAGCCAGGCAGGTGAGGTAA
Axin1	Del 6|0	0	8.32301	0	0	0	0	0	0	0	0	0	0	0	0	0	0	0	0	0	0	0	0	0	0	0	0	GTTCTGAGGCCCGTCATCTGGTCCCTGCCTCAGCCAATAGGCGGCAGGAGCCCGAGCTGCAGCCTAGAGTCACGCTTCTGCCTCCCAGCCACACAGTGGCCAAG------|GACCGGCTTCCTAGAGTGGCTGAAAGTGCTCGGACGGACAGCCAAGCCCATCATGGCGGACAGCGGGACAGTGGGTCGTGATCAGGCACTTGGAGCCAGGCAGGTGAGGTAA
Axin1	Del 2|1	0	0	23.9726	0	0	0	0	0	0	0	0	0	0	0	0	0	0	0	0	0	0	0	0	0	0	0	GTTCTGAGGCCCGTCATCTGGTCCCTGCCTCAGCCAATAGGCGGCAGGAGCCCGAGCTGCAGCCTAGAGTCACGCTTCTGCCTCCCAGCCACACAGTGGCCAAGAGCA--|-ACCGGCTTCCTAGAGTGGCTGAAAGTGCTCGGACGGACAGCCAAGCCCATCATGGCGGACAGCGGGACAGTGGGTCGTGATCAGGCACTTGGAGCCAGGCAGGTGAGGTAA
Axin1	Del 5|0	0	0	0	58.8751	0	0	0	0	0	0	16.9631	0	0	0	0	0	0	0	0	0	0	0	0	0	0	0	GTTCTGAGGCCCGTCATCTGGTCCCTGCCTCAGCCAATAGGCGGCAGGAGCCCGAGCTGCAGCCTAGAGTCACGCTTCTGCCTCCCAGCCACACAGTGGCCAAGA-----|GACCGGCTTCCTAGAGTGGCTGAAAGTGCTCGGACGGACAGCCAAGCCCATCATGGCGGACAGCGGGACAGTGGGTCGTGATCAGGCACTTGGAGCCAGGCAGGTGAGGTAA
Axin1	Del 2|0	0	0	0	0	0	27.1096	0	17.7579	0	0	0	0	0	0	0	39.9357	0	0	0	12.4506	0	0	0	0	0	0	GTTCTGAGGCCCGTCATCTGGTCCCTGCCTCAGCCAATAGGCGGCAGGAGCCCGAGCTGCAGCCTAGAGTCACGCTTCTGCCTCCCAGCCACACAGTGGCCAAGAGCA--|GACCGGCTTCCTAGAGTGGCTGAAAGTGCTCGGACGGACAGCCAAGCCCATCATGGCGGACAGCGGGACAGTGGGTCGTGATCAGGCACTTGGAGCCAGGCAGGTGAGGTAA
Axin1	Del 11|0	0	0	0	0	0	0	18.9556	0	0	0	0	0	0	0	0	0	0	0	0	0	0	0	0	0	0	0	GTTCTGAGGCCCGTCATCTGGTCCCTGCCTCAGCCAATAGGCGGCAGGAGCCCGAGCTGCAGCCTAGAGTCACGCTTCTGCCTCCCAGCCACACAGTGG-----------|GACCGGCTTCCTAGAGTGGCTGAAAGTGCTCGGACGGACAGCCAAGCCCATCATGGCGGACAGCGGGACAGTGGGTCGTGATCAGGCACTTGGAGCCAGGCAGGTGAGGTAA
Axin1	Del 8|0	0	0	0	0	0	0	0	0	0	0	0	0	0	18.5453	0	0	0	0	0	0	0	0	0	0	0	0	GTTCTGAGGCCCGTCATCTGGTCCCTGCCTCAGCCAATAGGCGGCAGGAGCCCGAGCTGCAGCCTAGAGTCACGCTTCTGCCTCCCAGCCACACAGTGGCCA--------|GACCGGCTTCCTAGAGTGGCTGAAAGTGCTCGGACGGACAGCCAAGCCCATCATGGCGGACAGCGGGACAGTGGGTCGTGATCAGGCACTTGGAGCCAGGCAGGTGAGGTAA
Axin1	Del 16|0	0	0	0	0	0	0	0	0	0	0	0	0	0	0	0	38.1935	0	0	0	0	0	0	0	0	0	0	GTTCTGAGGCCCGTCATCTGGTCCCTGCCTCAGCCAATAGGCGGCAGGAGCCCGAGCTGCAGCCTAGAGTCACGCTTCTGCCTCCCAGCCACAC---------------|GACCGGCTTCCTAGAGTGGCTGAAAGTGCTCGGACGGACAGCCAAGCCCATCATGGCGGACAGCGGGACAGTGGGTCGTGATCAGGCACTTGGAGCCAGGCAGGTGAGGTAA
Axin1	Del 3|0	0	0	0	0	0	0	0	0	0	0	0	0	0	0	0	0	0	15.6629	0	0	0	0	0	0	0	0	GTTCTGAGGCCCGTCATCTGGTCCCTGCCTCAGCCAATAGGCGGCAGGAGCCCGAGCTGCAGCCTAGAGTCACGCTTCTGCCTCCCAGCCACACAGTGGCCAAGAGC---|GACCGGCTTCCTAGAGTGGCTGAAAGTGCTCGGACGGACAGCCAAGCCCATCATGGCGGACAGCGGGACAGTGGGTCGTGATCAGGCACTTGGAGCCAGGCAGGTGAGGTAA
Axin1	Del 25|11	0	0	0	0	0	0	0	0	0	0	0	0	0	0	0	0	0	0	0	0	12.4833	0	0	0	0	0	GTTCTGAGGCCCGTCATCTGGTCCCTGCCTCAGCCAATAGGCGGCAGGAGCCCGAGCTGCAGCCTAGAGTCACGCTTCTGCCTCC-------------------------|-----------TAGAGTGGCTGAAAGTGCTCGGACGGACAGCCAAGCCCATCATGGCGGACAGCGGGACAGTGGGTCGTGATCAGGCACTTGGAGCCAGGCAGGTGAGGTAA
Cdkn2a	WT	28.7611	57.9096	65.417	24.9682	84.5383	47.345	60.197	65.9392	36.6363	51.1286	68.3195	100	9.84275	55.6842	60.0381	34.9184	21.8559	33.2506	70.7944	49.2585	76.7915	100	50.2241	61.5316	52.2019	49.2142	CAGGTGATGATGATGGGCAACGTTCACGTAGCAGCTCTTCTGCTCAACTACGGTGCAGATTCGAACTGCGAGGACCCCACTACCTTCTCCCGCCC|GGTGCACGACGCAGCGCGGGAAGGCTTCCTGGACACGCTGGTGGTGCTGCACGGGTCAGGGGCTCGGCTGGATGTGCGCGATGCCTGGGGTCGCCTGCCGCTCGACTTGGCCCAAGA
Cdkn2a	Del 0|15	36.2534	0	0	0	0	0	0	0	0	0	0	0	0	0	0	0	0	0	0	0	0	0	0	0	0	0	CAGGTGATGATGATGGGCAACGTTCACGTAGCAGCTCTTCTGCTCAACTACGGTGCAGATTCGAACTGCGAGGACCCCACTACCTTCTCCCGCCC|G---------------CGGGAAGGCTTCCTGGACACGCTGGTGGTGCTGCACGGGTCAGGGGCTCGGCTGGATGTGCGCGATGCCTGGGGTCGCCTGCCGCTCGACTTGGCCCAAGA
Cdkn2a	Del 0|7	34.9855	0	0	0	0	0	6.23846	0	0	0	8.122	0	0	0	0	0	0	0	14.9465	0	0	0	8.27579	4.19965	6.31637	6.42059	CAGGTGATGATGATGGGCAACGTTCACGTAGCAGCTCTTCTGCTCAACTACGGTGCAGATTCGAACTGCGAGGACCCCACTACCTTCTCCCGCCC|-------GACGCAGCGCGGGAAGGCTTCCTGGACACGCTGGTGGTGCTGCACGGGTCAGGGGCTCGGCTGGATGTGCGCGATGCCTGGGGTCGCCTGCCGCTCGACTTGGCCCAAGA
Cdkn2a	Del 0|1	0	32.8118	0	0	0	0	20.0821	19.7274	35.5252	0	15.283	0	0	22.5053	0	0	0	16.5736	0	41.4439	0	0	26.9583	23.3521	28.0656	31.2766	CAGGTGATGATGATGGGCAACGTTCACGTAGCAGCTCTTCTGCTCAACTACGGTGCAGATTCGAACTGCGAGGACCCCACTACCTTCTCCCGCCC|-GTGCACGACGCAGCGCGGGAAGGCTTCCTGGACACGCTGGTGGTGCTGCACGGGTCAGGGGCTCGGCTGGATGTGCGCGATGCCTGGGGTCGCCTGCCGCTCGACTTGGCCCAAGA
Cdkn2a	Ins 1 C	0	9.27863	0	0	0	0	0	0	0	0	0	0	0	0	0	0	0	0	0	0	0	0	0	0	0	0	CAGGTGATGATGATGGGCAACGTTCACGTAGCAGCTCTTCTGCTCAACTACGGTGCAGATTCGAACTGCGAGGACCCCACTACCTTCTCCCGCCC|{C}GGTGCACGACGCAGCGCGGGAAGGCTTCCTGGACACGCTGGTGGTGCTGCACGGGTCAGGGGCTCGGCTGGATGTGCGCGATGCCTGGGGTCGCCTGCCGCTCGACTTGGCCCAAGA
Cdkn2a	Del 1|0	0	0	34.583	0	15.4617	0	0	0	0	24.1076	0	0	0	21.8105	19.4065	24.1178	38.1479	50.1758	0	0	0	0	0	0	0	0	CAGGTGATGATGATGGGCAACGTTCACGTAGCAGCTCTTCTGCTCAACTACGGTGCAGATTCGAACTGCGAGGACCCCACTACCTTCTCCCGCC-|GGTGCACGACGCAGCGCGGGAAGGCTTCCTGGACACGCTGGTGGTGCTGCACGGGTCAGGGGCTCGGCTGGATGTGCGCGATGCCTGGGGTCGCCTGCCGCTCGACTTGGCCCAAGA
Cdkn2a	Del 17|29	0	0	0	39.6227	0	0	0	0	0	0	0	0	0	0	0	0	0	0	0	0	0	0	0	0	0	0	CAGGTGATGATGATGGGCAACGTTCACGTAGCAGCTCTTCTGCTCAACTACGGTGCAGATTCGAACTGCGAGGACCCC-----------------|-----------------------------CTGGACACGCTGGTGGTGCTGCACGGGTCAGGGGCTCGGCTGGATGTGCGCGATGCCTGGGGTCGCCTGCCGCTCGACTTGGCCCAAGA
Cdkn2a	Del 9|23	0	0	0	35.4091	0	0	0	0	0	0	0	0	0	0	0	0	0	0	0	0	0	0	0	0	0	0	CAGGTGATGATGATGGGCAACGTTCACGTAGCAGCTCTTCTGCTCAACTACGGTGCAGATTCGAACTGCGAGGACCCCACTACCTT---------|-----------------------GGCTTCCTGGACACGCTGGTGGTGCTGCACGGGTCAGGGGCTCGGCTGGATGTGCGCGATGCCTGGGGTCGCCTGCCGCTCGACTTGGCCCAAGA
Cdkn2a	Del 0|4	0	0	0	0	0	27.8764	0	0	0	0	0	0	0	0	0	0	0	0	0	0	0	0	4.89927	3.99646	4.22358	2.8207	CAGGTGATGATGATGGGCAACGTTCACGTAGCAGCTCTTCTGCTCAACTACGGTGCAGATTCGAACTGCGAGGACCCCACTACCTTCTCCCGCCC|G----ACGACGCAGCGCGGGAAGGCTTCCTGGACACGCTGGTGGTGCTGCACGGGTCAGGGGCTCGGCTGGATGTGCGCGATGCCTGGGGTCGCCTGCCGCTCGACTTGGCCCAAGA
Cdkn2a	Ins 1 G	0	0	0	0	0	24.7786	0	0	0	0	0	0	0	0	0	0	0	0	14.259	0	0	0	0	0	0	0	CAGGTGATGATGATGGGCAACGTTCACGTAGCAGCTCTTCTGCTCAACTACGGTGCAGATTCGAACTGCGAGGACCCCACTACCTTCTCCCGCCC|{G}GGTGCACGACGCAGCGCGGGAAGGCTTCCTGGACACGCTGGTGGTGCTGCACGGGTCAGGGGCTCGGCTGGATGTGCGCGATGCCTGGGGTCGCCTGCCGCTCGACTTGGCCCAAGA
Cdkn2a	Del 0|10	0	0	0	0	0	0	7.97045	0	0	0	0	0	0	0	0	0	0	0	0	0	0	0	0	0	0	0	CAGGTGATGATGATGGGCAACGTTCACGTAGCAGCTCTTCTGCTCAACTACGGTGCAGATTCGAACTGCGAGGACCCCACTACCTTCTCCCGCCC|----------GCAGCGCGGGAAGGCTTCCTGGACACGCTGGTGGTGCTGCACGGGTCAGGGGCTCGGCTGGATGTGCGCGATGCCTGGGGTCGCCTGCCGCTCGACTTGGCCCAAGA
Cdkn2a	Del 0|16	0	0	0	0	0	0	5.512	0	0	0	8.27549	0	0	0	0	0	0	0	0	0	3.88088	0	0	0	0	0	CAGGTGATGATGATGGGCAACGTTCACGTAGCAGCTCTTCTGCTCAACTACGGTGCAGATTCGAACTGCGAGGACCCCACTACCTTCTCCCGCCC|G----------------CGGGAAGGCTTCCTGGACACGCTGGTGGTGCTGCACGGGTCAGGGGCTCGGCTGGATGTGCGCGATGCCTGGGGTCGCCTGCCGCTCGACTTGGCCCAAGA
Cdkn2a	Del 0|3	0	0	0	0	0	0	0	14.3334	0	0	0	0	0	0	0	0	0	0	0	0	10.2161	0	0	0	0	0	CAGGTGATGATGATGGGCAACGTTCACGTAGCAGCTCTTCTGCTCAACTACGGTGCAGATTCGAACTGCGAGGACCCCACTACCTTCTCCCGCCC|---GCACGACGCAGCGCGGGAAGGCTTCCTGGACACGCTGGTGGTGCTGCACGGGTCAGGGGCTCGGCTGGATGTGCGCGATGCCTGGGGTCGCCTGCCGCTCGACTTGGCCCAAGA
Cdkn2a	Del 4|0	0	0	0	0	0	0	0	0	27.8385	0	0	0	0	0	0	0	0	0	0	0	0	0	0	0	0	0	CAGGTGATGATGATGGGCAACGTTCACGTAGCAGCTCTTCTGCTCAACTACGGTGCAGATTCGAACTGCGAGGACCCCACTACCTTCTCCC----|GGTGCACGACGCAGCGCGGGAAGGCTTCCTGGACACGCTGGTGGTGCTGCACGGGTCAGGGGCTCGGCTGGATGTGCGCGATGCCTGGGGTCGCCTGCCGCTCGACTTGGCCCAAGA
Cdkn2a	Del 1|2	0	0	0	0	0	0	0	0	0	24.7637	0	0	0	0	0	0	0	0	0	0	0	0	0	0	0	0	CAGGTGATGATGATGGGCAACGTTCACGTAGCAGCTCTTCTGCTCAACTACGGTGCAGATTCGAACTGCGAGGACCCCACTACCTTCTCCCGCC-|--TGCACGACGCAGCGCGGGAAGGCTTCCTGGACACGCTGGTGGTGCTGCACGGGTCAGGGGCTCGGCTGGATGTGCGCGATGCCTGGGGTCGCCTGCCGCTCGACTTGGCCCAAGA
Cdkn2a	Del 2|2	0	0	0	0	0	0	0	0	0	0	0	0	45.5348	0	0	0	0	0	0	0	0	0	0	0	0	0	CAGGTGATGATGATGGGCAACGTTCACGTAGCAGCTCTTCTGCTCAACTACGGTGCAGATTCGAACTGCGAGGACCCCACTACCTTCTCCCGC--|--TGCACGACGCAGCGCGGGAAGGCTTCCTGGACACGCTGGTGGTGCTGCACGGGTCAGGGGCTCGGCTGGATGTGCGCGATGCCTGGGGTCGCCTGCCGCTCGACTTGGCCCAAGA
Cdkn2a	Del 0|5	0	0	0	0	0	0	0	0	0	0	0	0	44.6224	0	0	0	0	0	0	0	0	0	0	0	0	0	CAGGTGATGATGATGGGCAACGTTCACGTAGCAGCTCTTCTGCTCAACTACGGTGCAGATTCGAACTGCGAGGACCCCACTACCTTCTCCCGCCC|-----ACGACGCAGCGCGGGAAGGCTTCCTGGACACGCTGGTGGTGCTGCACGGGTCAGGGGCTCGGCTGGATGTGCGCGATGCCTGGGGTCGCCTGCCGCTCGACTTGGCCCAAGA
Cdkn2a	Del 1|1	0	0	0	0	0	0	0	0	0	0	0	0	0	0	20.5554	0	0	0	0	0	0	0	0	0	0	0	CAGGTGATGATGATGGGCAACGTTCACGTAGCAGCTCTTCTGCTCAACTACGGTGCAGATTCGAACTGCGAGGACCCCACTACCTTCTCCCGCC-|-GTGCACGACGCAGCGCGGGAAGGCTTCCTGGACACGCTGGTGGTGCTGCACGGGTCAGGGGCTCGGCTGGATGTGCGCGATGCCTGGGGTCGCCTGCCGCTCGACTTGGCCCAAGA
Cdkn2a	Del 0|17	0	0	0	0	0	0	0	0	0	0	0	0	0	0	0	40.9638	0	0	0	0	0	0	0	0	0	0	CAGGTGATGATGATGGGCAACGTTCACGTAGCAGCTCTTCTGCTCAACTACGGTGCAGATTCGAACTGCGAGGACCCCACTACCTTCTCCCGCCC|-----------------CGCGGGAAGGCTTCCTGGACACGCTGGTGGTGCTGCACGGGTCAGGGGCTCGGCTGGATGTGCGCGATGCCTGGGGTCGCCTGCCGCTCGACTTGGCCCAAGA
Cdkn2a	Del 4|5	0	0	0	0	0	0	0	0	0	0	0	0	0	0	0	0	39.9962	0	0	0	0	0	0	0	0	0	CAGGTGATGATGATGGGCAACGTTCACGTAGCAGCTCTTCTGCTCAACTACGGTGCAGATTCGAACTGCGAGGACCCCACTACCTTCTCCC----|-----ACGACGCAGCGCGGGAAGGCTTCCTGGACACGCTGGTGGTGCTGCACGGGTCAGGGGCTCGGCTGGATGTGCGCGATGCCTGGGGTCGCCTGCCGCTCGACTTGGCCCAAGA
Cdkn2a	Del 2|15	0	0	0	0	0	0	0	0	0	0	0	0	0	0	0	0	0	0	0	0	9.11143	0	0	0	0	0	CAGGTGATGATGATGGGCAACGTTCACGTAGCAGCTCTTCTGCTCAACTACGGTGCAGATTCGAACTGCGAGGACCCCACTACCTTCTCCCGC--|---------------GCGGGAAGGCTTCCTGGACACGCTGGTGGTGCTGCACGGGTCAGGGGCTCGGCTGGATGTGCGCGATGCCTGGGGTCGCCTGCCGCTCGACTTGGCCCAAGA
Cdkn2a	Del 2|0	0	0	0	0	0	0	0	0	0	0	0	0	0	0	0	0	0	0	0	9.29758	0	0	9.64255	6.92026	9.1925	10.2679	CAGGTGATGATGATGGGCAACGTTCACGTAGCAGCTCTTCTGCTCAACTACGGTGCAGATTCGAACTGCGAGGACCCCACTACCTTCTCCCGC--|GGTGCACGACGCAGCGCGGGAAGGCTTCCTGGACACGCTGGTGGTGCTGCACGGGTCAGGGGCTCGGCTGGATGTGCGCGATGCCTGGGGTCGCCTGCCGCTCGACTTGGCCCAAGA
Chd1	WT	19.5331	56.4966	49.5301	28.9417	75.2219	100	72.9528	67.5427	47.277	48.1766	78.8571	67.5986	11.9454	100	65.0452	22.9597	67.9361	28.5901	85.37	76.2616	83.5066	100	55.6825	67.0911	58.2821	62.6668	AGCGACTCTGATTCTGGCTCTGACTCAGGAAGTCAATCAGAGTCTGAATCAGACACATCCCGAGAGAACAAGGTTCAAGCAAAACCACCAAAAGT|CGACGGAGCCGAGGTAAGTTAGTGCAATTGAACTGGCTTAAGACAGAAGTTAAATCTTATAACTGACTGGACAGTGTCATGGCCTGGGCATATAGCGCAGCAGTACAGCAC
Chd1	Del 2|0	37.7274	0	0	0	0	0	0	0	0	0	0	0	0	0	0	0	0	0	0	0	0	0	0	0	0	0	AGCGACTCTGATTCTGGCTCTGACTCAGGAAGTCAATCAGAGTCTGAATCAGACACATCCCGAGAGAACAAGGTTCAAGCAAAACCACCAA--GT|CGACGGAGCCGAGGTAAGTTAGTGCAATTGAACTGGCTTAAGACAGAAGTTAAATCTTATAACTGACTGGACAGTGTCATGGCCTGGGCATATAGCGCAGCAGTACAGCAC
Chd1	Del 2|0	37.2534	0	28.2387	0	0	0	0	0	0	0	0	0	0	0	0	0	0	14.9294	0	0	0	0	0	0	0	0	AGCGACTCTGATTCTGGCTCTGACTCAGGAAGTCAATCAGAGTCTGAATCAGACACATCCCGAGAGAACAAGGTTCAAGCAAAACCACCAAAA--|CGACGGAGCCGAGGTAAGTTAGTGCAATTGAACTGGCTTAAGACAGAAGTTAAATCTTATAACTGACTGGACAGTGTCATGGCCTGGGCATATAGCGCAGCAGTACAGCAC
Chd1	Del 0|4	5.48611	0	0	35.9597	0	0	0	0	0	0	0	0	0	0	0	0	0	0	0	0	0	0	0	0	0	0	AGCGACTCTGATTCTGGCTCTGACTCAGGAAGTCAATCAGAGTCTGAATCAGACACATCCCGAGAGAACAAGGTTCAAGCAAAACCACCAAAAGT|----GGAGCCGAGGTAAGTTAGTGCAATTGAACTGGCTTAAGACAGAAGTTAAATCTTATAACTGACTGGACAGTGTCATGGCCTGGGCATATAGCGCAGCAGTACAGCAC
Chd1	Del 0|1	0	13.3563	22.2312	0	0	0	0	0	0	0	0	0	0	0	17.6047	0	0	0	0	0	0	0	0.702137	0.997102	4.28041	10.0732	AGCGACTCTGATTCTGGCTCTGACTCAGGAAGTCAATCAGAGTCTGAATCAGACACATCCCGAGAGAACAAGGTTCAAGCAAAACCACCAAAAGT|-GACGGAGCCGAGGTAAGTTAGTGCAATTGAACTGGCTTAAGACAGAAGTTAAATCTTATAACTGACTGGACAGTGTCATGGCCTGGGCATATAGCGCAGCAGTACAGCAC
Chd1	Ins 1 T	0	12.3494	0	0	0	0	0	16.7902	0	0	0	0	88.0546	0	17.3501	0	16.5127	27.4707	0	13.8386	0	0	35.1156	27.5675	32.1528	23.3209	AGCGACTCTGATTCTGGCTCTGACTCAGGAAGTCAATCAGAGTCTGAATCAGACACATCCCGAGAGAACAAGGTTCAAGCAAAACCACCAAAAGT{T}|CGACGGAGCCGAGGTAAGTTAGTGCAATTGAACTGGCTTAAGACAGAAGTTAAATCTTATAACTGACTGGACAGTGTCATGGCCTGGGCATATAGCGCAGCAGTACAGCAC
Chd1	Del 0|3	0	8.933	0	0	0	0	0	0	0	0	0	0	0	0	0	0	0	0	0	0	0	0	0	0	0	0	AGCGACTCTGATTCTGGCTCTGACTCAGGAAGTCAATCAGAGTCTGAATCAGACACATCCCGAGAGAACAAGGTTCAAGCAAAACCACCAAAAGT|---CGGAGCCGAGGTAAGTTAGTGCAATTGAACTGGCTTAAGACAGAAGTTAAATCTTATAACTGACTGGACAGTGTCATGGCCTGGGCATATAGCGCAGCAGTACAGCAC
Chd1	Del 1|2	0	8.86467	0	0	0	0	0	0	0	0	0	0	0	0	0	0	0	0	0	0	0	0	0	0	0	0	AGCGACTCTGATTCTGGCTCTGACTCAGGAAGTCAATCAGAGTCTGAATCAGACACATCCCGAGAGAACAAGGTTCAAGCAAAACCACCAAAAG-|--ACGGAGCCGAGGTAAGTTAGTGCAATTGAACTGGCTTAAGACAGAAGTTAAATCTTATAACTGACTGGACAGTGTCATGGCCTGGGCATATAGCGCAGCAGTACAGCAC
Chd1	Del 1|0	0	0	0	35.0985	0	0	0	0	0	26.5709	0	0	0	0	0	0	0	0	0	0	16.4934	0	0	0	0	0	AGCGACTCTGATTCTGGCTCTGACTCAGGAAGTCAATCAGAGTCTGAATCAGACACATCCCGAGAGAACAAGGTTCAAGCAAAACCACCAAAAG-|CGACGGAGCCGAGGTAAGTTAGTGCAATTGAACTGGCTTAAGACAGAAGTTAAATCTTATAACTGACTGGACAGTGTCATGGCCTGGGCATATAGCGCAGCAGTACAGCAC
Chd1	Del 20|0	0	0	0	0	13.4065	0	0	0	0	0	0	0	0	0	0	0	0	0	0	0	0	0	0	0	0	0	AGCGACTCTGATTCTGGCTCTGACTCAGGAAGTCAATCAGAGTCTGAATCAGACACATCCCGAGAGAACAAGGTT--------------------|CGACGGAGCCGAGGTAAGTTAGTGCAATTGAACTGGCTTAAGACAGAAGTTAAATCTTATAACTGACTGGACAGTGTCATGGCCTGGGCATATAGCGCAGCAGTACAGCAC
Chd1	Del 7|0	0	0	0	0	11.3716	0	0	0	0	0	0	0	0	0	0	0	0	0	0	0	0	0	0	0	0	0	AGCGACTCTGATTCTGGCTCTGACTCAGGAAGTCAATCAGAGTCTGAATCAGACACATCCCGAGAGAACAAGGTTCAAGCAAAACCAC-------|CGACGGAGCCGAGGTAAGTTAGTGCAATTGAACTGGCTTAAGACAGAAGTTAAATCTTATAACTGACTGGACAGTGTCATGGCCTGGGCATATAGCGCAGCAGTACAGCAC
Chd1	Del 5|3	0	0	0	0	0	0	13.3497	0	0	0	0	0	0	0	0	0	0	0	0	0	0	0	0	0	0	0	AGCGACTCTGATTCTGGCTCTGACTCAGGAAGTCAATCAGAGTCTGAATCAGACACATCCCGAGAGAACAAGGTTCAAGCAAAACCACCA-----|--ACGGAGCCGAGGTAAGTTAGTGCAATTGAACTGGCTTAAGACAGAAGTTAAATCTTATAACTGACTGGACAGTGTCATGGCCTGGGCATATAGCGCAGCAGTACAGCAC
Chd1	Del 3|0	0	0	0	0	0	0	13.6975	0	0	0	0	0	0	0	0	0	0	0	0	0	0	0	0	0	0	0	AGCGACTCTGATTCTGGCTCTGACTCAGGAAGTCAATCAGAGTCTGAATCAGACACATCCCGAGAGAACAAGGTTCAAGCAAAACCACCAA---T|CGACGGAGCCGAGGTAAGTTAGTGCAATTGAACTGGCTTAAGACAGAAGTTAAATCTTATAACTGACTGGACAGTGTCATGGCCTGGGCATATAGCGCAGCAGTACAGCAC
Chd1	Del 2|3	0	0	0	0	0	0	0	15.667	38.0258	25.2525	0	0	0	0	0	0	15.5512	0	0	0	0	0	0	0	0	0	AGCGACTCTGATTCTGGCTCTGACTCAGGAAGTCAATCAGAGTCTGAATCAGACACATCCCGAGAGAACAAGGTTCAAGCAAAACCACCAAAA--|---CGGAGCCGAGGTAAGTTAGTGCAATTGAACTGGCTTAAGACAGAAGTTAAATCTTATAACTGACTGGACAGTGTCATGGCCTGGGCATATAGCGCAGCAGTACAGCAC
Chd1	Del 63|21	0	0	0	0	0	0	0	0	14.6972	0	0	0	0	0	0	0	0	0	0	0	0	0	0	0	0	0	AGCGACTCTGATTCTGGCTCTGACTCAGGAAG---------------------------------------------------------------|---------------------GTGCAATTGAACTGGCTTAAGACAGAAGTTAAATCTTATAACTGACTGGACAGTGTCATGGCCTGGGCATATAGCGCAGCAGTACAGCAC
Chd1	Del 16|0	0	0	0	0	0	0	0	0	0	0	15.7238	0	0	0	0	0	0	0	0	0	0	0	0	0	0	0	AGCGACTCTGATTCTGGCTCTGACTCAGGAAGTCAATCAGAGTCTGAATCAGACACATCCCGAGAGAACAAGGTTCAAG----------------|CGACGGAGCCGAGGTAAGTTAGTGCAATTGAACTGGCTTAAGACAGAAGTTAAATCTTATAACTGACTGGACAGTGTCATGGCCTGGGCATATAGCGCAGCAGTACAGCAC
Chd1	Del 45|55	0	0	0	0	0	0	0	0	0	0	5.41913	0	0	0	0	0	0	0	0	0	0	0	0	0	0	0	AGCGACTCTGATTCTGGCTCTGACTCAGGAAGTCAATCAGAGTCTGAATC---------------------------------------------|-------------------------------------------------------CTTATAACTGACTGGACAGTGTCATGGCCTGGGCATATAGCGCAGCAGTACAGCAC
Chd1	Del 1|2	0	0	0	0	0	0	0	0	0	0	0	0	0	0	0	37.8668	0	0	0	0	0	0	0	0	0	0	AGCGACTCTGATTCTGGCTCTGACTCAGGAAGTCAATCAGAGTCTGAATCAGACACATCCCGAGAGAACAAGGTTCAAGCAAAACCACCAAAAG-|--ACGGAGCCGAGGTAAGTTAGTGCAATTGAACTGGCTTAAGACAGAAGTTAAATCTTATAACTGACTGGACAGTGTCATGGCCTGGGCATATAGCGCAGCAGTACAGCAC
Chd1	Del 4|0	0	0	0	0	0	0	0	0	0	0	0	32.4014	0	0	0	0	0	0	0	0	0	0	0	0	0	0	AGCGACTCTGATTCTGGCTCTGACTCAGGAAGTCAATCAGAGTCTGAATCAGACACATCCCGAGAGAACAAGGTTCAAGCAAAACCACCAA----|CGACGGAGCCGAGGTAAGTTAGTGCAATTGAACTGGCTTAAGACAGAAGTTAAATCTTATAACTGACTGGACAGTGTCATGGCCTGGGCATATAGCGCAGCAGTACAGCAC
Chd1	Del 13|0	0	0	0	0	0	0	0	0	0	0	0	0	0	0	0	39.1735	0	0	0	0	0	0	0	0	0	0	AGCGACTCTGATTCTGGCTCTGACTCAGGAAGTCAATCAGAGTCTGAATCAGACACATCCCGAGAGAACAAGGTTCAAGCA-------------T|CGACGGAGCCGAGGTAAGTTAGTGCAATTGAACTGGCTTAAGACAGAAGTTAAATCTTATAACTGACTGGACAGTGTCATGGCCTGGGCATATAGCGCAGCAGTACAGCAC
Chd1	Del 0|2	0	0	0	0	0	0	0	0	0	0	0	0	0	0	0	0	0	15.0153	0	0	0	0	0	0	0	0	AGCGACTCTGATTCTGGCTCTGACTCAGGAAGTCAATCAGAGTCTGAATCAGACACATCCCGAGAGAACAAGGTTCAAGCAAAACCACCAAAAGT|--ACGGAGCCGAGGTAAGTTAGTGCAATTGAACTGGCTTAAGACAGAAGTTAAATCTTATAACTGACTGGACAGTGTCATGGCCTGGGCATATAGCGCAGCAGTACAGCAC
Chd1	Del 6|0	0	0	0	0	0	0	0	0	0	0	0	0	0	0	0	0	0	13.9945	0	0	0	0	0	0	0	0	AGCGACTCTGATTCTGGCTCTGACTCAGGAAGTCAATCAGAGTCTGAATCAGACACATCCCGAGAGAACAAGGTTCAAGCAAAACCACC------|CGACGGAGCCGAGGTAAGTTAGTGCAATTGAACTGGCTTAAGACAGAAGTTAAATCTTATAACTGACTGGACAGTGTCATGGCCTGGGCATATAGCGCAGCAGTACAGCAC
Chd1	Del 19|29	0	0	0	0	0	0	0	0	0	0	0	0	0	0	0	0	0	0	14.63	0	0	0	0	0	0	0	AGCGACTCTGATTCTGGCTCTGACTCAGGAAGTCAATCAGAGTCTGAATCAGACACATCCCGAGAGAACAAGGTTC-------------------|-----------------------------GAACTGGCTTAAGACAGAAGTTAAATCTTATAACTGACTGGACAGTGTCATGGCCTGGGCATATAGCGCAGCAGTACAGCAC
Chd1	Del 11|7	0	0	0	0	0	0	0	0	0	0	0	0	0	0	0	0	0	0	0	9.89981	0	0	0	0	0	0	AGCGACTCTGATTCTGGCTCTGACTCAGGAAGTCAATCAGAGTCTGAATCAGACACATCCCGAGAGAACAAGGTTCAAGCAAAA-----------|-------GCCGAGGTAAGTTAGTGCAATTGAACTGGCTTAAGACAGAAGTTAAATCTTATAACTGACTGGACAGTGTCATGGCCTGGGCATATAGCGCAGCAGTACAGCAC
Chd1	Del 0|10	0	0	0	0	0	0	0	0	0	0	0	0	0	0	0	0	0	0	0	0	0	0	8.49978	4.34435	5.2847	3.93922	AGCGACTCTGATTCTGGCTCTGACTCAGGAAGTCAATCAGAGTCTGAATCAGACACATCCCGAGAGAACAAGGTTCAAGCAAAACCACCAAAAGT|----------GAGGTAAGTTAGTGCAATTGAACTGGCTTAAGACAGAAGTTAAATCTTATAACTGACTGGACAGTGTCATGGCCTGGGCATATAGCGCAGCAGTACAGCAC
Col1a1	WT	28.8844	72.7026	100	22.7275	86.4254	42.8481	79.4003	61.6448	100	45.7088	100	62.8925	100	54.5022	60.8124	20.9733	23.7888	75.3192	100	93.6465	65.0768	100	88.2227	90.5061	81.5869	86.4102	AGTCCAAGACCTTCTCCCAGCATGAAGAGGATGCTAAACCCGTGGTAATAAGGCCAAGGCTGTGGCCCTGATGCGTCTGTGACTTCTCTCCACTTAGGGTCCTTCCGGTGA|ACGTGGTGCTCCCGGACCTGCTGGTCCCAAAGGTTCTCCTGGTGAAGCTGGTCGCCCCGGTGAAGCTGGTCTCCCTGGTGCCAAGGTGAGAAGATCCTCTGTCCTGTATGG
Col1a1	Del 1|0	64.2467	18.3862	0	37.1378	0	0	20.5997	38.3552	0	28.0338	0	37.1075	0	0	20.0107	40.3909	0	18.4458	0	0	0	0	0.677775	0.96755	4.9384	0.462978	AGTCCAAGACCTTCTCCCAGCATGAAGAGGATGCTAAACCCGTGGTAATAAGGCCAAGGCTGTGGCCCTGATGCGTCTGTGACTTCTCTCCACTTAGGGTCCTTCCGGTG-|ACGTGGTGCTCCCGGACCTGCTGGTCCCAAAGGTTCTCCTGGTGAAGCTGGTCGCCCCGGTGAAGCTGGTCTCCCTGGTGCCAAGGTGAGAAGATCCTCTGTCCTGTATGG
Col1a1	Del 0|6	6.86893	0	0	0	0	0	0	0	0	0	0	0	0	0	0	0	0	0	0	0	0	0	0	0	0	0	AGTCCAAGACCTTCTCCCAGCATGAAGAGGATGCTAAACCCGTGGTAATAAGGCCAAGGCTGTGGCCCTGATGCGTCTGTGACTTCTCTCCACTTAGGGTCCTTCCGGTGA|------TGCTCCCGGACCTGCTGGTCCCAAAGGTTCTCCTGGTGAAGCTGGTCGCCCCGGTGAAGCTGGTCTCCCTGGTGCCAAGGTGAGAAGATCCTCTGTCCTGTATGG
Col1a1	Ins 1 A	0	8.91121	0	0	0	0	0	0	0	0	0	0	0	22.591	0	0	37.6398	0	0	0	0	0	0	0	0	0	AGTCCAAGACCTTCTCCCAGCATGAAGAGGATGCTAAACCCGTGGTAATAAGGCCAAGGCTGTGGCCCTGATGCGTCTGTGACTTCTCTCCACTTAGGGTCCTTCCGGTGA{A}|ACGTGGTGCTCCCGGACCTGCTGGTCCCAAAGGTTCTCCTGGTGAAGCTGGTCGCCCCGGTGAAGCTGGTCTCCCTGGTGCCAAGGTGAGAAGATCCTCTGTCCTGTATGG
Col1a1	Del 11|7	0	0	0	40.1347	0	0	0	0	0	0	0	0	0	0	0	0	0	0	0	0	0	0	0	0	0	0	AGTCCAAGACCTTCTCCCAGCATGAAGAGGATGCTAAACCCGTGGTAATAAGGCCAAGGCTGTGGCCCTGATGCGTCTGTGACTTCTCTCCACTTAGGGT-----------|-------GCTCCCGGACCTGCTGGTCCCAAAGGTTCTCCTGGTGAAGCTGGTCGCCCCGGTGAAGCTGGTCTCCCTGGTGCCAAGGTGAGAAGATCCTCTGTCCTGTATGG
Col1a1	Del 0|2	0	0	0	0	13.5746	0	0	0	0	0	0	0	0	0	19.1769	0	0	0	0	0	0	0	0	0	0	0	AGTCCAAGACCTTCTCCCAGCATGAAGAGGATGCTAAACCCGTGGTAATAAGGCCAAGGCTGTGGCCCTGATGCGTCTGTGACTTCTCTCCACTTAGGGTCCTTCCGGTGA|--GTGGTGCTCCCGGACCTGCTGGTCCCAAAGGTTCTCCTGGTGAAGCTGGTCGCCCCGGTGAAGCTGGTCTCCCTGGTGCCAAGGTGAGAAGATCCTCTGTCCTGTATGG
Col1a1	Del 17|0	0	0	0	0	0	29.1365	0	0	0	0	0	0	0	0	0	0	0	0	0	0	0	0	0	0	0	0	AGTCCAAGACCTTCTCCCAGCATGAAGAGGATGCTAAACCCGTGGTAATAAGGCCAAGGCTGTGGCCCTGATGCGTCTGTGACTTCTCTCCAC-----------------A|ACGTGGTGCTCCCGGACCTGCTGGTCCCAAAGGTTCTCCTGGTGAAGCTGGTCGCCCCGGTGAAGCTGGTCTCCCTGGTGCCAAGGTGAGAAGATCCTCTGTCCTGTATGG
Col1a1	Del 19|0	0	0	0	0	0	28.0154	0	0	0	0	0	0	0	0	0	0	0	0	0	0	0	0	0	0	0	0	AGTCCAAGACCTTCTCCCAGCATGAAGAGGATGCTAAACCCGTGGTAATAAGGCCAAGGCTGTGGCCCTGATGCGTCTGTGACTTCTCTCCA-------------------|ACGTGGTGCTCCCGGACCTGCTGGTCCCAAAGGTTCTCCTGGTGAAGCTGGTCGCCCCGGTGAAGCTGGTCTCCCTGGTGCCAAGGTGAGAAGATCCTCTGTCCTGTATGG
Col1a1	Del 1|0	0	0	0	0	0	0	0	0	0	26.2574	0	0	0	0	0	0	0	0	0	6.35346	0	0	0	0	0	0	AGTCCAAGACCTTCTCCCAGCATGAAGAGGATGCTAAACCCGTGGTAATAAGGCCAAGGCTGTGGCCCTGATGCGTCTGTGACTTCTCTCCACTTAGGGTCCTTCCGGT-A|ACGTGGTGCTCCCGGACCTGCTGGTCCCAAAGGTTCTCCTGGTGAAGCTGGTCGCCCCGGTGAAGCTGGTCTCCCTGGTGCCAAGGTGAGAAGATCCTCTGTCCTGTATGG
Col1a1	Del 4|0	0	0	0	0	0	0	0	0	0	0	0	0	0	22.9068	0	38.6357	0	0	0	0	0	0	0	0	0	0	AGTCCAAGACCTTCTCCCAGCATGAAGAGGATGCTAAACCCGTGGTAATAAGGCCAAGGCTGTGGCCCTGATGCGTCTGTGACTTCTCTCCACTTAGGGTCCTTCCG----|ACGTGGTGCTCCCGGACCTGCTGGTCCCAAAGGTTCTCCTGGTGAAGCTGGTCGCCCCGGTGAAGCTGGTCTCCCTGGTGCCAAGGTGAGAAGATCCTCTGTCCTGTATGG
Col1a1	Del 0|5	0	0	0	0	0	0	0	0	0	0	0	0	0	0	0	0	38.5714	0	0	0	0	0	0	0	0	0	AGTCCAAGACCTTCTCCCAGCATGAAGAGGATGCTAAACCCGTGGTAATAAGGCCAAGGCTGTGGCCCTGATGCGTCTGTGACTTCTCTCCACTTAGGGTCCTTCCGGTGA|-----GTGCTCCCGGACCTGCTGGTCCCAAAGGTTCTCCTGGTGAAGCTGGTCGCCCCGGTGAAGCTGGTCTCCCTGGTGCCAAGGTGAGAAGATCCTCTGTCCTGTATGG
Col1a1	Del 37|81	0	0	0	0	0	0	0	0	0	0	0	0	0	0	0	0	0	6.23502	0	0	0	0	0	0	0	0	AGTCCAAGACCTTCTCCAAGACCTTCTCCCAGCATGAAGAGGATGCTAAACCCGTGGTAATAAGGCCAAGGCTGTGGCCCTGATGC------------------------------------- | ---------------------------------------------------------------------------------CAAGGTGAGAAGATCCTCTGTCCTGTATGGG
Col1a1	Del 6|0	0	0	0	0	0	0	0	0	0	0	0	0	0	0	0	0	0	0	0	0	17.7545	0	0	0	0	0	AGTCCAAGACCTTCTCCCAGCATGAAGAGGATGCTAAACCCGTGGTAATAAGGCCAAGGCTGTGGCCCTGATGCGTCTGTGACTTCTCTCCACTTAGGGTCCTTC------|ACGTGGTGCTCCCGGACCTGCTGGTCCCAAAGGTTCTCCTGGTGAAGCTGGTCGCCCCGGTGAAGCTGGTCTCCCTGGTGCCAAGGTGAGAAGATCCTCTGTCCTGTATGG
Col1a1	Del 1|8	0	0	0	0	0	0	0	0	0	0	0	0	0	0	0	0	0	0	0	0	17.1687	0	0	0	0	0	AGTCCAAGACCTTCTCCCAGCATGAAGAGGATGCTAAACCCGTGGTAATAAGGCCAAGGCTGTGGCCCTGATGCGTCTGTGACTTCTCTCCACTTAGGGTCCTTCCGGTG-|--------CTCCCGGACCTGCTGGTCCCAAAGGTTCTCCTGGTGAAGCTGGTCGCCCCGGTGAAGCTGGTCTCCCTGGTGCCAAGGTGAGAAGATCCTCTGTCCTGTATGG
Col1a1	Del 0|1	0	0	0	0	0	0	0	0	0	0	0	0	0	0	0	0	0	0	0	0	0	0	10.4188	8.03704	9.87771	12.6807	AGTCCAAGACCTTCTCCCAGCATGAAGAGGATGCTAAACCCGTGGTAATAAGGCCAAGGCTGTGGCCCTGATGCGTCTGTGACTTCTCTCCACTTAGGGTCCTTCCGGTGA|A-GTGGTGCTCCCGGACCTGCTGGTCCCAAAGGTTCTCCTGGTGAAGCTGGTCGCCCCGGTGAAGCTGGTCTCCCTGGTGCCAAGGTGAGAAGATCCTCTGTCCTGTATGG
Col1a1	Del 10|4	0	0	0	0	0	0	0	0	0	0	0	0	0	0	0	0	0	0	0	0	0	0	0.6808	0.48932	3.59699	0.446104	AGTCCAAGACCTTCTCCCAGCATGAAGAGGATGCTAAACCCGTGGTAATAAGGCCAAGGCTGTGGCCCTGATGCGTCTGTGACTTCTCTCCACTTAGGGTC----------|----GGTGCTCCCGGACCTGCTGGTCCCAAAGGTTCTCCTGGTGAAGCTGGTCGCCCCGGTGAAGCTGGTCTCCCTGGTGCCAAGGTGAGAAGATCCTCTGTCCTGTATGG
Dlc1	WT	20.2304	67.5605	100	26.8656	88.0062	49.0495	71.6285	67.4818	39.7285	49.2511	85.1573	31.9479	11.443	73.9919	64.4719	23.0383	69.0936	63.4588	71.506	83.483	66.3999	100	46.8498	57.7106	52.6503	63.1704	ACGAAAGCATGCTGACAGACCTCAGCGAGCACCAGGAGGTGGCCTCTGTCCGAAGCCTCAGCAGCACCAGCAGCAGCGTCCCCACCCACGCAGCCCACAGTGGAGATGCCACTACGCCCCGAAC|CAATTCCGTCATCAGCGTCTGCTCCTCCGGACACTTTGTAGGCAATGATGACTCTTTTTCCAGCCTGCCGTCTCCCAAGGAACTGTCCAGCTTCAGT
Dlc1	Del 0|3	40.2377	0	0	0	0	0	0	0	0	0	0	0	0	0	0	0	0	0	0	0	0	0	0	0	0	0	ACGAAAGCATGCTGACAGACCTCAGCGAGCACCAGGAGGTGGCCTCTGTCCGAAGCCTCAGCAGCACCAGCAGCAGCGTCCCCACCCACGCAGCCCACAGTGGAGATGCCACTACGCCCCGAAC|---TTCCGTCATCAGCGTCTGCTCCTCCGGACACTTTGTAGGCAATGATGACTCTTTTTCCAGCCTGCCGTCTCCCAAGGAACTGTCCAGCTTCAGT
Dlc1	Del 1|0	39.5319	23.1971	0	35.1537	0	50.9505	16.8851	18.6342	34.0245	50.7489	14.8427	33.7123	88.557	0	17.9674	37.4712	17.9494	17.3891	15.1685	0	33.6001	0	40.4016	33.9112	38.923	32.0011	ACGAAAGCATGCTGACAGACCTCAGCGAGCACCAGGAGGTGGCCTCTGTCCGAAGCCTCAGCAGCACCAGCAGCAGCGTCCCCACCCACGCAGCCCACAGTGGAGATGCCACTACGCCCCGAA-|CAATTCCGTCATCAGCGTCTGCTCCTCCGGACACTTTGTAGGCAATGATGACTCTTTTTCCAGCCTGCCGTCTCCCAAGGAACTGTCCAGCTTCAGT
Dlc1	Del 17|4	0	9.24239	0	0	0	0	0	0	0	0	0	0	0	0	0	0	0	0	0	0	0	0	0	0	0	0	ACGAAAGCATGCTGACAGACCTCAGCGAGCACCAGGAGGTGGCCTCTGTCCGAAGCCTCAGCAGCACCAGCAGCAGCGTCCCCACCCACGCAGCCCACAGTGGAGAT-----------------|----TCCGTCATCAGCGTCTGCTCCTCCGGACACTTTGTAGGCAATGATGACTCTTTTTCCAGCCTGCCGTCTCCCAAGGAACTGTCCAGCTTCAGT
Dlc1	Del 5|2	0	0	0	37.9807	0	0	0	0	0	0	0	0	0	0	0	0	0	0	0	0	0	0	0	0	0	0	ACGAAAGCATGCTGACAGACCTCAGCGAGCACCAGGAGGTGGCCTCTGTCCGAAGCCTCAGCAGCACCAGCAGCAGCGTCCCCACCCACGCAGCCCACAGTGGAGATGCCACTACGCCC-----|--ATTCCGTCATCAGCGTCTGCTCCTCCGGACACTTTGTAGGCAATGATGACTCTTTTTCCAGCCTGCCGTCTCCCAAGGAACTGTCCAGCTTCAGT
Dlc1	Del 5|0	0	0	0	0	11.9938	0	0	0	0	0	0	0	0	0	0	0	0	0	0	0	0	0	0	0	0	0	ACGAAAGCATGCTGACAGACCTCAGCGAGCACCAGGAGGTGGCCTCTGTCCGAAGCCTCAGCAGCACCAGCAGCAGCGTCCCCACCCACGCAGCCCACAGTGGAGATGCCACTACGCCC-----|CAATTCCGTCATCAGCGTCTGCTCCTCCGGACACTTTGTAGGCAATGATGACTCTTTTTCCAGCCTGCCGTCTCCCAAGGAACTGTCCAGCTTCAGT
Dlc1	Del 0|4	0	0	0	0	0	0	11.4863	13.8839	0	0	0	0	0	0	17.5607	0	12.957	0	0	0	0	0	12.7487	8.37816	8.42666	4.82848	ACGAAAGCATGCTGACAGACCTCAGCGAGCACCAGGAGGTGGCCTCTGTCCGAAGCCTCAGCAGCACCAGCAGCAGCGTCCCCACCCACGCAGCCCACAGTGGAGATGCCACTACGCCCCGAAC|----TCCGTCATCAGCGTCTGCTCCTCCGGACACTTTGTAGGCAATGATGACTCTTTTTCCAGCCTGCCGTCTCCCAAGGAACTGTCCAGCTTCAGT
Dlc1	Del 19|21	0	0	0	0	0	0	0	0	26.2469	0	0	0	0	0	0	0	0	0	0	0	0	0	0	0	0	0	ACGAAAGCATGCTGACAGACCTCAGCGAGCACCAGGAGGTGGCCTCTGTCCGAAGCCTCAGCAGCACCAGCAGCAGCGTCCCCACCCACGCAGCCCACAGTGGAG-------------------|---------------------CTCCTCCGGACACTTTGTAGGCAATGATGACTCTTTTTCCAGCCTGCCGTCTCCCAAGGAACTGTCCAGCTTCAGT
Dlc1	Del 28|25	0	0	0	0	0	0	0	0	0	0	0	0	0	26.0081	0	0	0	0	0	0	0	0	0	0	0	0	ACGAAAGCATGCTGACAGACCTCAGCGAGCACCAGGAGGTGGCCTCTGTCCGAAGCCTCAGCAGCACCAGCAGCAGCGTCCCCACCCACGCAGCCC----------------------------|-------------------------TCCGGACACTTTGTAGGCAATGATGACTCTTTTTCCAGCCTGCCGTCTCCCAAGGAACTGTCCAGCTTCAGT
Dlc1	Del 3|21	0	0	0	0	0	0	0	0	0	0	0	0	0	0	0	39.4906	0	0	0	0	0	0	0	0	0	0	ACGAAAGCATGCTGACAGACCTCAGCGAGCACCAGGAGGTGGCCTCTGTCCGAAGCCTCAGCAGCACCAGCAGCAGCGTCCCCACCCACGCAGCCCACAGTGGAGATGCCACTACGCCCCG---|---------------------CTCCTCCGGACACTTTGTAGGCAATGATGACTCTTTTTCCAGCCTGCCGTCTCCCAAGGAACTGTCCAGCTTCAGT
Dlc1	Del 29|25	0	0	0	0	0	0	0	0	0	0	0	0	0	0	0	0	0	19.152	0	0	0	0	0	0	0	0	ACGAAAGCATGCTGACAGACCTCAGCGAGCACCAGGAGGTGGCCTCTGTCCGAAGCCTCAGCAGCACCAGCAGCAGCGTCCCCACCCACGCAGCC-----------------------------|-------------------------TCCGGACACTTTGTAGGCAATGATGACTCTTTTTCCAGCCTGCCGTCTCCCAAGGAACTGTCCAGCTTCAGT
Dlc1	Del 0|9	0	0	0	0	0	0	0	0	0	0	0	34.3398	0	0	0	0	0	0	0	0	0	0	0	0	0	0	ACGAAAGCATGCTGACAGACCTCAGCGAGCACCAGGAGGTGGCCTCTGTCCGAAGCCTCAGCAGCACCAGCAGCAGCGTCCCCACCCACGCAGCCCACAGTGGAGATGCCACTACGCCCCGAAC|---------CATCAGCGTCTGCTCCTCCGGACACTTTGTAGGCAATGATGACTCTTTTTCCAGCCTGCCGTCTCCCAAGGAACTGTCCAGCTTCAGT
Dlc1	Del 0|6	0	0	0	0	0	0	0	0	0	0	0	0	0	0	0	0	0	0	13.3255	0	0	0	0	0	0	0	ACGAAAGCATGCTGACAGACCTCAGCGAGCACCAGGAGGTGGCCTCTGTCCGAAGCCTCAGCAGCACCAGCAGCAGCGTCCCCACCCACGCAGCCCACAGTGGAGATGCCACTACGCCCCGAAC|------CGTCATCAGCGTCTGCTCCTCCGGACACTTTGTAGGCAATGATGACTCTTTTTCCAGCCTGCCGTCTCCCAAGGAACTGTCCAGCTTCAGT
Dlc1	Del 30|3	0	0	0	0	0	0	0	0	0	0	0	0	0	0	0	0	0	0	0	16.517	0	0	0	0	0	0	ACGAAAGCATGCTGACAGACCTCAGCGAGCACCAGGAGGTGGCCTCTGTCCGAAGCCTCAGCAGCACCAGCAGCAGCGTCCCCACCCACGCAGC------------------------------|---TTCCGTCATCAGCGTCTGCTCCTCCGGACACTTTGTAGGCAATGATGACTCTTTTTCCAGCCTGCCGTCTCCCAAGGAACTGTCCAGCTTCAGT
Fbxw7	WT	24.9815	84.7843	100	65.9693	100	74.166	71.4235	87.2774	100	75.1291	100	34.4048	100	61.1422	78.0832	100	64.5062	100	85.9762	100	71.4239	100	94.5855	96.0074	86.3632	99.6618	GTGTGAGTATGCCTTCCCTATTTCCTTTTCCATAGTTGGCACTCTATGTGCTTTCATTCCTGGAACCCAAAGACCTGCTGCAAGCGGCTCAGACTTGTCGA|TACTGGAGAATTTTGGCTGAGGATAACCTTCTCTGGAGAGAGAAATGTAAAGAAGAGGGTAAGTTCAGAATCACACACAGATGTGTTTCTACTCTGGAAACAAGTTAACAGAATAACTTGGCTGTGAGTGAGAGT
Fbxw7	Del 12|18	35.5641	0	0	0	0	0	0	0	0	0	0	0	0	0	0	0	0	0	0	0	0	0	0	0	0	0	GTGTGAGTATGCCTTCCCTATTTCCTTTTCCATAGTTGGCACTCTATGTGCTTTCATTCCTGGAACCCAAAGACCTGCTGCAAGCGGCT------------|------------------GAGGATAACCTTCTCTGGAGAGAGAAATGTAAAGAAGAGGGTAAGTTCAGAATCACACACAGATGTGTTTCTACTCTGGAAACAAGTTAACAGAATAACTTGGCTGTGAGTGAGAGT
Fbxw7	Del 6|0	33.9303	0	0	0	0	0	0	0	0	0	0	0	0	0	0	0	0	0	0	0	0	0	0	0	0	0	GTGTGAGTATGCCTTCCCTATTTCCTTTTCCATAGTTGGCACTCTATGTGCTTTCATTCCTGGAACCCAAAGACCTGCTGCAAGCGGCTCAGACT------|TACTGGAGAATTTTGGCTGAGGATAACCTTCTCTGGAGAGAGAAATGTAAAGAAGAGGGTAAGTTCAGAATCACACACAGATGTGTTTCTACTCTGGAAACAAGTTAACAGAATAACTTGGCTGTGAGTGAGAGT
Fbxw7	Del 16|8	5.52416	0	0	0	0	0	0	0	0	0	0	0	0	0	0	0	0	0	0	0	0	0	0	0	0	0	GTGTGAGTATGCCTTCCCTATTTCCTTTTCCATAGTTGGCACTCTATGTGCTTTCATTCCTGGAACCCAAAGACCTGCTGCAAGC----------------|--------AATTTTGGCTGAGGATAACCTTCTCTGGAGAGAGAAATGTAAAGAAGAGGGTAAGTTCAGAATCACACACAGATGTGTTTCTACTCTGGAAACAAGTTAACAGAATAACTTGGCTGTGAGTGAGAGT
Fbxw7	Del 2|0	0	8.47153	0	0	0	0	15.0647	0	0	0	0	0	0	0	0	0	35.4938	0	0	0	0	0	0	0	0	0	GTGTGAGTATGCCTTCCCTATTTCCTTTTCCATAGTTGGCACTCTATGTGCTTTCATTCCTGGAACCCAAAGACCTGCTGCAAGCGGCTCAGACTTGTC--|TACTGGAGAATTTTGGCTGAGGATAACCTTCTCTGGAGAGAGAAATGTAAAGAAGAGGGTAAGTTCAGAATCACACACAGATGTGTTTCTACTCTGGAAACAAGTTAACAGAATAACTTGGCTGTGAGTGAGAGT
Fbxw7	Del 0|2	0	3.51844	0	34.0307	0	0	0	0	0	0	0	0	0	0	0	0	0	0	0	0	28.5761	0	0	0	0	0	GTGTGAGTATGCCTTCCCTATTTCCTTTTCCATAGTTGGCACTCTATGTGCTTTCATTCCTGGAACCCAAAGACCTGCTGCAAGCGGCTCAGACTTGTCGA|--CTGGAGAATTTTGGCTGAGGATAACCTTCTCTGGAGAGAGAAATGTAAAGAAGAGGGTAAGTTCAGAATCACACACAGATGTGTTTCTACTCTGGAAACAAGTTAACAGAATAACTTGGCTGTGAGTGAGAGT
Fbxw7	Ins 3 AAA	0	3.22569	0	0	0	0	0	0	0	0	0	0	0	0	0	0	0	0	0	0	0	0	0	0	0	0	GTGTGAGTATGCCTTCCCTATTTCCTTTTCCATAGTTGGCACTCTATGTGCTTTCATTCCTGGAACCCAAAGACCTGCTGCAAGCGGCTCAGACTTGTCGA{AAA}|TACTGGAGAATTTTGGCTGAGGATAACCTTCTCTGGAGAGAGAAATGTAAAGAAGAGGGTAAGTTCAGAATCACACACAGATGTGTTTCTACTCTGGAAACAAGTTAACAGAATAACTTGGCTGTGAGTGAGAGT
Fbxw7	Del 0|1	0	0	0	0	0	25.834	0	12.7226	0	0	0	32.5539	0	19.5943	0	0	0	0	14.0238	0	0	0	0	0	0	0	GTGTGAGTATGCCTTCCCTATTTCCTTTTCCATAGTTGGCACTCTATGTGCTTTCATTCCTGGAACCCAAAGACCTGCTGCAAGCGGCTCAGACTTGTCGA|-ACTGGAGAATTTTGGCTGAGGATAACCTTCTCTGGAGAGAGAAATGTAAAGAAGAGGGTAAGTTCAGAATCACACACAGATGTGTTTCTACTCTGGAAACAAGTTAACAGAATAACTTGGCTGTGAGTGAGAGT
Fbxw7	Del 5|0 Ins 1T	0	0	0	0	0	0	13.5118	0	0	0	0	0	0	0	0	0	0	0	0	0	0	0	0	0	0	0	GTGTGAGTATGCCTTCCCTATTTCCTTTTCCATAGTTGGCACTCTATGTGCTTTCATTCCTGGAACCCAAAGACCTGCTGCAAGCGGCTCAGACTT-----{T}|TACTGGAGAATTTTGGCTGAGGATAACCTTCTCTGGAGAGAGAAATGTAAAGAAGAGGGTAAGTTCAGAATCACACACAGATGTGTTTCTACTCTGGAAACAAGTTAACAGAATAACTTGGCTGTGAGTGAGAGT
Fbxw7	Del 1|0	0	0	0	0	0	0	0	0	0	24.8709	0	0	0	0	0	0	0	0	0	0	0	0	0	0	0	0	GTGTGAGTATGCCTTCCCTATTTCCTTTTCCATAGTTGGCACTCTATGTGCTTTCATTCCTGGAACCCAAAGACCTGCTGCAAGCGGCTCAGACTTGTCG-|TACTGGAGAATTTTGGCTGAGGATAACCTTCTCTGGAGAGAGAAATGTAAAGAAGAGGGTAAGTTCAGAATCACACACAGATGTGTTTCTACTCTGGAAACAAGTTAACAGAATAACTTGGCTGTGAGTGAGAGT
Fbxw7	Del 2|2	0	0	0	0	0	0	0	0	0	0	0	33.0413	0	0	0	0	0	0	0	0	0	0	0	0	0	0	GTGTGAGTATGCCTTCCCTATTTCCTTTTCCATAGTTGGCACTCTATGTGCTTTCATTCCTGGAACCCAAAGACCTGCTGCAAGCGGCTCAGACTTGTC--|--CTGGAGAATTTTGGCTGAGGATAACCTTCTCTGGAGAGAGAAATGTAAAGAAGAGGGTAAGTTCAGAATCACACACAGATGTGTTTCTACTCTGGAAACAAGTTAACAGAATAACTTGGCTGTGAGTGAGAGT
Fbxw7	Del 2|8	0	0	0	0	0	0	0	0	0	0	0	0	0	19.2635	0	0	0	0	0	0	0	0	0	0	0	0	GTGTGAGTATGCCTTCCCTATTTCCTTTTCCATAGTTGGCACTCTATGTGCTTTCATTCCTGGAACCCAAAGACCTGCTGCAAGCGGCTCAGACTTGTC--|--------AATTTTGGCTGAGGATAACCTTCTCTGGAGAGAGAAATGTAAAGAAGAGGGTAAGTTCAGAATCACACACAGATGTGTTTCTACTCTGGAAACAAGTTAACAGAATAACTTGGCTGTGAGTGAGAGT
Fbxw7	Del 14|0	0	0	0	0	0	0	0	0	0	0	0	0	0	0	21.9168	0	0	0	0	0	0	0	0	0	0	0	GTGTGAGTATGCCTTCCCTATTTCCTTTTCCATAGTTGGCACTCTATGTGCTTTCATTCCTGGAACCCAAAGACCTGCTGCAAGCGG--------------|TACTGGAGAATTTTGGCTGAGGATAACCTTCTCTGGAGAGAGAAATGTAAAGAAGAGGGTAAGTTCAGAATCACACACAGATGTGTTTCTACTCTGGAAACAAGTTAACAGAATAACTTGGCTGTGAGTGAGAGT
Fbxw7	Del 3|7	0	0	0	0	0	0	0	0	0	0	0	0	0	0	0	0	0	0	0	0	0	0	5.41454	3.99263	13.6368	0.338153	GTGTGAGTATGCCTTCCCTATTTCCTTTTCCATAGTTGGCACTCTATGTGCTTTCATTCCTGGAACCCAAAGACCTGCTGCAAGCGGCTCAGACTTGT---|-------GAATTTTGGCTGAGGATAACCTTCTCTGGAGAGAGAAATGTAAAGAAGAGGGTAAGTTCAGAATCACACACAGATGTGTTTCTACTCTGGAAACAAGTTAACAGAATAACTTGGCTGTGAGTGAGAGT
Hic1	WT	54.7619	59.2621	52.126	31.1377	82.4255	65.3793	80.1136	65.8043	44.831	44.2384	77.9412	60.4017	21.1688	67.4265	73.6984	26.5758	44.058	52.861	83.9768	81.3231	72.9776	71.9892	55.6864	59.6885	60.8388	60.7098	CTACGCTCCTTACGGGCGGCCCGGCCGGGGCTTGAGGGCTGCCACGCCCGTCATCCAGGCTTGCTACTCGTCCCCGGCCGGGCCACCGCCGCCGCCTGCCGCCGAGCCGCCGTCG|GGCCCCGATGCAGCCGTCAACACCCACTGCGCTGAGCTATATGCTTCAGGCCCGGGCCCAGCAGCCTCACTCTGCGCCCCGGAGCGTCGCTGCTCCCCGCTTTG
Hic1	Del 23|11	28.2313	0	0	0	0	0	0	0	0	0	0	0	0	0	0	0	0	0	0	0	0	0	0	0	0	0	CTACGCTCCTTACGGGCGGCCCGGCCGGGGCTTGAGGGCTGCCACGCCCGTCATCCAGGCTTGCTACTCGTCCCCGGCCGGGCCACCGCCGC----------------------- | -----------AGCCGTCAACACCCACTGCGCTGAGCTATATGCTTCAGGCCCGGGCCCAGCAGCCTCACTCTGCGCCCCGGAGCGTCGCTGCTCCCCGCTTTG
Hic1	Del 1|0	11.9048	40.7379	19.0551	38.982	10.2775	0	19.8864	34.1957	28.8767	55.7616	22.0588	39.5983	45.0649	32.5735	26.3016	38.6712	46.087	47.139	16.0232	18.6769	27.0224	28.0108	39.3029	35.3503	35.9382	36.1764	CTACGCTCCTTACGGGCGGCCCGGCCGGGGCTTGAGGGCTGCCACGCCCGTCATCCAGGCTTGCTACTCGTCCCCGGCCGGGCCACCGCCGCCGCCTGCCGCCGAGCCGCCGTC-|GGCCCCGATGCAGCCGTCAACACCCACTGCGCTGAGCTATATGCTTCAGGCCCGGGCCCAGCAGCCTCACTCTGCGCCCCGGAGCGTCGCTGCTCCCCGCTTTG
Hic1	Del 0|19	5.10204	0	0	0	0	0	0	0	0	0	0	0	0	0	0	0	0	0	0	0	0	0	0	0	0	0	CTACGCTCCTTACGGGCGGCCCGGCCGGGGCTTGAGGGCTGCCACGCCCGTCATCCAGGCTTGCTACTCGTCCCCGGCCGGGCCACCGCCGCCGCCTGCCGCCGAGCCGCCGTCG|G-------------------CACCCACTGCGCTGAGCTATATGCTTCAGGCCCGGGCCCAGCAGCCTCACTCTGCGCCCCGGAGCGTCGCTGCTCCCCGCTTTG
Hic1	Del 0|2	0	0	28.8189	0	0	0	0	0	0	0	0	0	0	0	0	0	0	0	0	0	0	0	0	0	0	0	CTACGCTCCTTACGGGCGGCCCGGCCGGGGCTTGAGGGCTGCCACGCCCGTCATCCAGGCTTGCTACTCGTCCCCGGCCGGGCCACCGCCGCCGCCTGCCGCCGAGCCGCCGTCG|G--CCCGATGCAGCCGTCAACACCCACTGCGCTGAGCTATATGCTTCAGGCCCGGGCCCAGCAGCCTCACTCTGCGCCCCGGAGCGTCGCTGCTCCCCGCTTTG
Hic1	Del 1|4	0	0	0	29.8802	0	0	0	0	0	0	0	0	0	0	0	0	0	0	0	0	0	0	0	0	0	0	CTACGCTCCTTACGGGCGGCCCGGCCGGGGCTTGAGGGCTGCCACGCCCGTCATCCAGGCTTGCTACTCGTCCCCGGCCGGGCCACCGCCGCCGCCTGCCGCCGAGCCGCCGTC- | ----CCGATGCAGCCGTCAACACCCACTGCGCTGAGCTATATGCTTCAGGCCCGGGCCCAGCAGCCTCACTCTGCGCCCCGGAGCGTCGCTGCTCCCCGCTTTG
Hic1	Del 4|0	0	0	0	0	7.29702	0	0	0	0	0	0	0	0	0	0	0	0	0	0	0	0	0	0	0	0	0	CTACGCTCCTTACGGGCGGCCCGGCCGGGGCTTGAGGGCTGCCACGCCCGTCATCCAGGCTTGCTACTCGTCCCCGGCCGGGCCACCGCCGCCGCCTGCCGCCGAGCCGCC----|GGCCCCGATGCAGCCGTCAACACCCACTGCGCTGAGCTATATGCTTCAGGCCCGGGCCCAGCAGCCTCACTCTGCGCCCCGGAGCGTCGCTGCTCCCCGCTTTG
Hic1	Del 0|7	0	0	0	0	0	18.2069	0	0	0	0	0	0	33.7662	0	0	0	0	0	0	0	0	0	0	0	0	0	CTACGCTCCTTACGGGCGGCCCGGCCGGGGCTTGAGGGCTGCCACGCCCGTCATCCAGGCTTGCTACTCGTCCCCGGCCGGGCCACCGCCGCCGCCTGCCGCCGAGCCGCCGTCG|-------ATGCAGCCGTCAACACCCACTGCGCTGAGCTATATGCTTCAGGCCCGGGCCCAGCAGCCTCACTCTGCGCCCCGGAGCGTCGCTGCTCCCCGCTTTG
Hic1	Del 1|11	0	0	0	0	0	16.4138	0	0	0	0	0	0	0	0	0	0	0	0	0	0	0	0	0	0	0	0	CTACGCTCCTTACGGGCGGCCCGGCCGGGGCTTGAGGGCTGCCACGCCCGTCATCCAGGCTTGCTACTCGTCCCCGGCCGGGCCACCGCCGCCGCCTGCCGCCGAGCCGCCGTC- | -----------AGCCGTCAACACCCACTGCGCTGAGCTATATGCTTCAGGCCCGGGCCCAGCAGCCTCACTCTGCGCCCCGGAGCGTCGCTGCTCCCCGCTTTG
Hic1	Del 0|9	0	0	0	0	0	0	0	0	26.2922	0	0	0	0	0	0	0	0	0	0	0	0	0	0	0	0	0	CTACGCTCCTTACGGGCGGCCCGGCCGGGGCTTGAGGGCTGCCACGCCCGTCATCCAGGCTTGCTACTCGTCCCCGGCCGGGCCACCGCCGCCGCCTGCCGCCGAGCCGCCGTCG|---------GCAGCCGTCAACACCCACTGCGCTGAGCTATATGCTTCAGGCCCGGGCCCAGCAGCCTCACTCTGCGCCCCGGAGCGTCGCTGCTCCCCGCTTTG
Hic1	Del 0|2	0	0	0	0	0	0	0	0	0	0	0	0	0	0	0	34.753	0	0	0	0	0	0	0	0	0	0	CTACGCTCCTTACGGGCGGCCCGGCCGGGGCTTGAGGGCTGCCACGCCCGTCATCCAGGCTTGCTACTCGTCCCCGGCCGGGCCACCGCCGCCGCCTGCCGCCGAGCCGCCGTCG|--CCCCGATGCAGCCGTCAACACCCACTGCGCTGAGCTATATGCTTCAGGCCCGGGCCCAGCAGCCTCACTCTGCGCCCCGGAGCGTCGCTGCTCCCCGCTTTG
Hic1	Ins 1C	0	0	0	0	0	0	0	0	0	0	0	0	0	0	0	0	9.85507	0	0	0	0	0	0	0	0	0	CTACGCTCCTTACGGGCGGCCCGGCCGGGGCTTGAGGGCTGCCACGCCCGTCATCCAGGCTTGCTACTCGTCCCCGGCCGGGCCACCGCCGCCGCCTGCCGCCGAGCCGCCGTCG|{C}GGCCCCGATGCAGCCGTCAACACCCACTGCGCTGAGCTATATGCTTCAGGCCCGGGCCCAGCAGCCTCACTCTGCGCCCCGGAGCGTCGCTGCTCCCCGCTTTG
Hic1	Del 2|0	0	0	0	0	0	0	0	0	0	0	0	0	0	0	0	0	0	0	0	0	0	0	5.0107	4.96119	3.22296	3.11384	CTACGCTCCTTACGGGCGGCCCGGCCGGGGCTTGAGGGCTGCCACGCCCGTCATCCAGGCTTGCTACTCGTCCCCGGCCGGGCCACCGCCGCCGCCTGCCGCCGAGCCGCCGT--|GGCCCCGATGCAGCCGTCAACACCCACTGCGCTGAGCTATATGCTTCAGGCCCGGGCCCAGCAGCCTCACTCTGCGCCCCGGAGCGTCGCTGCTCCCCGCTTTG
Hnf1a	WT	36.4349	53.2076	62.7292	100	100	100	71.2888	65.8588	37.1798	100	88.4222	100	37.1648	100	64.7357	34.668	100	38.5614	70.1749	60.1092	100	100	100	100	100	100	GCCCTACCTGATGGTTGGAGAGGGTCCCCTGGACAAGGGGGAGTCCTGCGGTGGGAGTCGAGGGGACCTGACCGAGTTGCCTAATGGCCTTGG|AGAAACGCGTGGCTCTGAAGATGACACGGATGACGATGGGGAAGACTTCGCGCCACCCATTCTGAAAGAGCTGGAGAACCTCAGCCCAGAGGAGGCAGCCCACCAGAAAGCCGTGGTGGAGTCA
Hnf1a	Del 0|13	44.8081	0	0	0	0	0	0	0	0	0	0	0	0	0	0	0	0	0	0	0	0	0	0	0	0	0	GCCCTACCTGATGGTTGGAGAGGGTCCCCTGGACAAGGGGGAGTCCTGCGGTGGGAGTCGAGGGGACCTGACCGAGTTGCCTAATGGCCTTGG|A-------------CTGAAGATGACACGGATGACGATGGGGAAGACTTCGCGCCACCCATTCTGAAAGAGCTGGAGAACCTCAGCCCAGAGGAGGCAGCCCACCAGAAAGCCGTGGTGGAGTCA
Hnf1a	Del 0|6	9.60049	0	0	0	0	0	0	0	0	0	0	0	0	0	0	0	0	0	0	0	0	0	0	0	0	0	GCCCTACCTGATGGTTGGAGAGGGTCCCCTGGACAAGGGGGAGTCCTGCGGTGGGAGTCGAGGGGACCTGACCGAGTTGCCTAATGGCCTTGG|A------CGTGGCTCTGAAGATGACACGGATGACGATGGGGAAGACTTCGCGCCACCCATTCTGAAAGAGCTGGAGAACCTCAGCCCAGAGGAGGCAGCCCACCAGAAAGCCGTGGTGGAGTCA
Hnf1a	Del 0|2	9.15658	26.2215	0	0	0	0	0	0	0	0	0	0	0	0	18.9395	0	0	0	0	0	0	0	0	0	0	0	GCCCTACCTGATGGTTGGAGAGGGTCCCCTGGACAAGGGGGAGTCCTGCGGTGGGAGTCGAGGGGACCTGACCGAGTTGCCTAATGGCCTTGG|--AAACGCGTGGCTCTGAAGATGACACGGATGACGATGGGGAAGACTTCGCGCCACCCATTCTGAAAGAGCTGGAGAACCTCAGCCCAGAGGAGGCAGCCCACCAGAAAGCCGTGGTGGAGTCA
Hnf1a	Ins 1 A	0	12.0533	0	0	0	0	0	17.2556	31.7368	0	0	0	62.8352	0	0	0	0	61.4386	0	0	0	0	0	0	0	0	GCCCTACCTGATGGTTGGAGAGGGTCCCCTGGACAAGGGGGAGTCCTGCGGTGGGAGTCGAGGGGACCTGACCGAGTTGCCTAATGGCCTTGG|{A}AGAAACGCGTGGCTCTGAAGATGACACGGATGACGATGGGGAAGACTTCGCGCCACCCATTCTGAAAGAGCTGGAGAACCTCAGCCCAGAGGAGGCAGCCCACCAGAAAGCCGTGGTGGAGTCA
Hnf1a	Del 0|3	0	8.51753	0	0	0	0	0	16.8856	0	0	0	0	0	0	0	0	0	0	0	0	0	0	0	0	0	0	GCCCTACCTGATGGTTGGAGAGGGTCCCCTGGACAAGGGGGAGTCCTGCGGTGGGAGTCGAGGGGACCTGACCGAGTTGCCTAATGGCCTTGG|---AACGCGTGGCTCTGAAGATGACACGGATGACGATGGGGAAGACTTCGCGCCACCCATTCTGAAAGAGCTGGAGAACCTCAGCCCAGAGGAGGCAGCCCACCAGAAAGCCGTGGTGGAGTCA
Hnf1a	Del 0|12	0	0	37.2708	0	0	0	0	0	0	0	0	0	0	0	16.3248	0	0	0	0	0	0	0	0	0	0	0	GCCCTACCTGATGGTTGGAGAGGGTCCCCTGGACAAGGGGGAGTCCTGCGGTGGGAGTCGAGGGGACCTGACCGAGTTGCCTAATGGCCTTGG|------------CTCTGAAGATGACACGGATGACGATGGGGAAGACTTCGCGCCACCCATTCTGAAAGAGCTGGAGAACCTCAGCCCAGAGGAGGCAGCCCACCAGAAAGCCGTGGTGGAGTCA
Hnf1a	Del 0|5	0	0	0	0	0	0	14.6861	0	0	0	0	0	0	0	0	0	0	0	13.7657	0	0	0	0	0	0	0	GCCCTACCTGATGGTTGGAGAGGGTCCCCTGGACAAGGGGGAGTCCTGCGGTGGGAGTCGAGGGGACCTGACCGAGTTGCCTAATGGCCTTGG|A-----GCGTGGCTCTGAAGATGACACGGATGACGATGGGGAAGACTTCGCGCCACCCATTCTGAAAGAGCTGGAGAACCTCAGCCCAGAGGAGGCAGCCCACCAGAAAGCCGTGGTGGAGTCA
Hnf1a	Del 5|14	0	0	0	0	0	0	14.0252	0	0	0	0	0	0	0	0	0	0	0	0	0	0	0	0	0	0	0	GCCCTACCTGATGGTTGGAGAGGGTCCCCTGGACAAGGGGGAGTCCTGCGGTGGGAGTCGAGGGGACCTGACCGAGTTGCCTAATGGC-----|--------------CTGAAGATGACACGGATGACGATGGGGAAGACTTCGCGCCACCCATTCTGAAAGAGCTGGAGAACCTCAGCCCAGAGGAGGCAGCCCACCAGAAAGCCGTGGTGGAGTCA
Hnf1a	Del 1|2	0	0	0	0	0	0	0	0	31.0835	0	0	0	0	0	0	0	0	0	0	0	0	0	0	0	0	0	GCCCTACCTGATGGTTGGAGAGGGTCCCCTGGACAAGGGGGAGTCCTGCGGTGGGAGTCGAGGGGACCTGACCGAGTTGCCTAATGGCCTTG-|--AAACGCGTGGCTCTGAAGATGACACGGATGACGATGGGGAAGACTTCGCGCCACCCATTCTGAAAGAGCTGGAGAACCTCAGCCCAGAGGAGGCAGCCCACCAGAAAGCCGTGGTGGAGTCA
Hnf1a	Del 22|69	0	0	0	0	0	0	0	0	0	0	11.5778	0	0	0	0	0	0	0	0	0	0	0	0	0	0	0	GCCCTACCTGATGGTTGGAGAGGGTCCCCTGGACAAGGGGGAGTCCTGCGGTGGGAGTCGAGGGGACCTGA----------------------|---------------------------------------------------------------------GCTGGAGAACCTCAGCCCAGAGGAGGCAGCCCACCAGAAAGCCGTGGTGGAGTCA
Hnf1a	Del 4|1	0	0	0	0	0	0	0	0	0	0	0	0	0	0	0	65.332	0	0	0	0	0	0	0	0	0	0	GCCCTACCTGATGGTTGGAGAGGGTCCCCTGGACAAGGGGGAGTCCTGCGGTGGGAGTCGAGGGGACCTGACCGAGTTGCCTAATGGCC----|-GAAACGCGTGGCTCTGAAGATGACACGGATGACGATGGGGAAGACTTCGCGCCACCCATTCTGAAAGAGCTGGAGAACCTCAGCCCAGAGGAGGCAGCCCACCAGAAAGCCGTGGTGGAGTCA
Hnf1a	Del 0|30 (D31 I1A)	0	0	0	0	0	0	0	0	0	0	0	0	0	0	0	0	0	0	16.0594	0	0	0	0	0	0	0	GCCCTACCTGATGGTTGGAGAGGGTCCCCTGGACAAGGGGGAGTCCTGCGGTGGGAGTCGAGGGGACCTGACCGAGTTGCCTAATGGCCTTGG|------------------------------ATGACGATGGGGAAGACTTCGCGCCACCCATTCTGAAAGAGCTGGAGAACCTCAGCCCAGAGGAGGCAGCCCACCAGAAAGCCGTGGTGGAGTCA
Hnf1a	Ins 2 AG	0	0	0	0	0	0	0	0	0	0	0	0	0	0	0	0	0	0	0	16.2242	0	0	0	0	0	0	GCCCTACCTGATGGTTGGAGAGGGTCCCCTGGACAAGGGGGAGTCCTGCGGTGGGAGTCGAGGGGACCTGACCGAGTTGCCTAATGGCCTTGG|{AG}AGAAACGCGTGGCTCTGAAGATGACACGGATGACGATGGGGAAGACTTCGCGCCACCCATTCTGAAAGAGCTGGAGAACCTCAGCCCAGAGGAGGCAGCCCACCAGAAAGCCGTGGTGGAGTCA
Hnf1a	Del 0|1 (D2 I1A)	0	0	0	0	0	0	0	0	0	0	0	0	0	0	0	0	0	0	0	12.2134	0	0	0	0	0	0	GCCCTACCTGATGGTTGGAGAGGGTCCCCTGGACAAGGGGGAGTCCTGCGGTGGGAGTCGAGGGGACCTGACCGAGTTGCCTAATGGCCTTGG|A-AAACGCGTGGCTCTGAAGATGACACGGATGACGATGGGGAAGACTTCGCGCCACCCATTCTGAAAGAGCTGGAGAACCTCAGCCCAGAGGAGGCAGCCCACCAGAAAGCCGTGGTGGAGTCA
Hnf1a	Del 3|0	0	0	0	0	0	0	0	0	0	0	0	0	0	0	0	0	0	0	0	11.4532	0	0	0	0	0	0	GCCCTACCTGATGGTTGGAGAGGGTCCCCTGGACAAGGGGGAGTCCTGCGGTGGGAGTCGAGGGGACCTGACCGAGTTGCCTAATGGCCT---|AGAAACGCGTGGCTCTGAAGATGACACGGATGACGATGGGGAAGACTTCGCGCCACCCATTCTGAAAGAGCTGGAGAACCTCAGCCCAGAGGAGGCAGCCCACCAGAAAGCCGTGGTGGAGTCA
Keap1	WT	28.1172	68.4779	47.4034	23.9069	76.1099	46.3853	71.3895	62.986	37.7109	72.0933	80.4357	32.1769	100	79.0938	62.5513	22.5838	62.6805	100	81.0414	74.5211	67.0682	75.3561	67.1227	77.3906	58.1431	58.0061	CTTCTACGTGCAGGCACTGCTGCGGGCCGTGCGCTGCCATGCGCTCACGCCGCGCTTCCTGCAGACGCAGCTGCAGAAGTGTGAGATCCTGCAGGCCGACG|CGCGCTGCAAGGACTACCTGGTGCAGATATTCCAGGAGCTCACGCTGCACAAGCCCACGCAGGCAGTGCCCTGCCGCGCGCCCAAAGTGGGCCGCCTCATCTACACAGCGGGCGGTTACTTCCGACAGTCGCT
Keap1	Del 2|0	57.449	20.0712	0	33.2144	12.0135	26.8139	0	37.014	35.2806	27.9067	19.5643	33.2174	0	0	37.4487	0	37.3195	0	0	25.4789	16.3837	0	22.3556	15.2042	27.0627	23.8186	CTTCTACGTGCAGGCACTGCTGCGGGCCGTGCGCTGCCATGCGCTCACGCCGCGCTTCCTGCAGACGCAGCTGCAGAAGTGTGAGATCCTGCAGGCCGA--|CGCGCTGCAAGGACTACCTGGTGCAGATATTCCAGGAGCTCACGCTGCACAAGCCCACGCAGGCAGTGCCCTGCCGCGCGCCCAAAGTGGGCCGCCTCATCTACACAGCGGGCGGTTACTTCCGACAGTCGCT
Keap1	Del 2|8	7.29978	0	0	0	0	0	0	0	0	0	0	0	0	0	0	0	0	0	0	0	0	0	0	0	0	0	CTTCTACGTGCAGGCACTGCTGCGGGCCGTGCGCTGCCATGCGCTCACGCCGCGCTTCCTGCAGACGCAGCTGCAGAAGTGTGAGATCCTGCAGGCCGA--|--------AAGGACTACCTGGTGCAGATATTCCAGGAGCTCACGCTGCACAAGCCCACGCAGGCAGTGCCCTGCCGCGCGCCCAAAGTGGGCCGCCTCATCTACACAGCGGGCGGTTACTTCCGACAGTCGCT
Keap1	Del 0|4	7.13397	0	0	0	11.8766	0	0	0	0	0	0	0	0	0	0	0	0	0	0	0	0	0	0.554673	0.440586	4.01034	13.6722	CTTCTACGTGCAGGCACTGCTGCGGGCCGTGCGCTGCCATGCGCTCACGCCGCGCTTCCTGCAGACGCAGCTGCAGAAGTGTGAGATCCTGCAGGCCGACG|----CTGCAAGGACTACCTGGTGCAGATATTCCAGGAGCTCACGCTGCACAAGCCCACGCAGGCAGTGCCCTGCCGCGCGCCCAAAGTGGGCCGCCTCATCTACACAGCGGGCGGTTACTTCCGACAGTCGCT
Keap1	Del 0|1	0	11.4509	0	0	0	0	16.3758	0	0	0	0	0	0	0	0	0	0	0	0	0	0	0	0	0	0	0	CTTCTACGTGCAGGCACTGCTGCGGGCCGTGCGCTGCCATGCGCTCACGCCGCGCTTCCTGCAGACGCAGCTGCAGAAGTGTGAGATCCTGCAGGCCGACG|-GCGCTGCAAGGACTACCTGGTGCAGATATTCCAGGAGCTCACGCTGCACAAGCCCACGCAGGCAGTGCCCTGCCGCGCGCCCAAAGTGGGCCGCCTCATCTACACAGCGGGCGGTTACTTCCGACAGTCGCT
Keap1	Del 0|10 (D11 I1C)	0	0	26.5881	0	0	0	0	0	0	0	0	0	0	0	0	0	0	0	0	0	0	0	0	0	0	0	CTTCTACGTGCAGGCACTGCTGCGGGCCGTGCGCTGCCATGCGCTCACGCCGCGCTTCCTGCAGACGCAGCTGCAGAAGTGTGAGATCCTGCAGGCCGACG|C-----------GACTACCTGGTGCAGATATTCCAGGAGCTCACGCTGCACAAGCCCACGCAGGCAGTGCCCTGCCGCGCGCCCAAAGTGGGCCGCCTCATCTACACAGCGGGCGGTTACTTCCGACAGTCGCT
Keap1	Del 0|3	0	0	26.0085	0	0	0	0	0	0	0	0	34.6057	0	0	0	0	0	0	0	0	0	0	9.96705	6.96457	10.7838	4.50304	CTTCTACGTGCAGGCACTGCTGCGGGCCGTGCGCTGCCATGCGCTCACGCCGCGCTTCCTGCAGACGCAGCTGCAGAAGTGTGAGATCCTGCAGGCCGACG|---GCTGCAAGGACTACCTGGTGCAGATATTCCAGGAGCTCACGCTGCACAAGCCCACGCAGGCAGTGCCCTGCCGCGCGCCCAAAGTGGGCCGCCTCATCTACACAGCGGGCGGTTACTTCCGACAGTCGCT
Keap1	Del 18|20	0	0	0	42.8787	0	0	0	0	0	0	0	0	0	0	0	0	0	0	0	0	0	0	0	0	0	0	CTTCTACGTGCAGGCACTGCTGCGGGCCGTGCGCTGCCATGCGCTCACGCCGCGCTTCCTGCAGACGCAGCTGCAGAAGTGTG------------------|--------------------GTGCAGATATTCCAGGAGCTCACGCTGCACAAGCCCACGCAGGCAGTGCCCTGCCGCGCGCCCAAAGTGGGCCGCCTCATCTACACAGCGGGCGGTTACTTCCGACAGTCGCT
Keap1	Del 0|10	0	0	0	0	0	26.8007	0	0	0	0	0	0	0	0	0	0	0	0	0	0	0	0	0	0	0	0	CTTCTACGTGCAGGCACTGCTGCGGGCCGTGCGCTGCCATGCGCTCACGCCGCGCTTCCTGCAGACGCAGCTGCAGAAGTGTGAGATCCTGCAGGCCGACG|----------GGACTACCTGGTGCAGATATTCCAGGAGCTCACGCTGCACAAGCCCACGCAGGCAGTGCCCTGCCGCGCGCCCAAAGTGGGCCGCCTCATCTACACAGCGGGCGGTTACTTCCGACAGTCGCT
Keap1	Del 0|17	0	0	0	0	0	0	12.2347	0	0	0	0	0	0	0	0	0	0	0	0	0	0	0	0	0	0	0	CTTCTACGTGCAGGCACTGCTGCGGGCCGTGCGCTGCCATGCGCTCACGCCGCGCTTCCTGCAGACGCAGCTGCAGAAGTGTGAGATCCTGCAGGCCGACG|-----------------CTGGTGCAGATATTCCAGGAGCTCACGCTGCACAAGCCCACGCAGGCAGTGCCCTGCCGCGCGCCCAAAGTGGGCCGCCTCATCTACACAGCGGGCGGTTACTTCCGACAGTCGCT
Keap1	Del 3|4	0	0	0	0	0	0	0	0	27.0085	0	0	0	0	0	0	0	0	0	0	0	0	0	0	0	0	0	CTTCTACGTGCAGGCACTGCTGCGGGCCGTGCGCTGCCATGCGCTCACGCCGCGCTTCCTGCAGACGCAGCTGCAGAAGTGTGAGATCCTGCAGGCCG---|----CTGCAAGGACTACCTGGTGCAGATATTCCAGGAGCTCACGCTGCACAAGCCCACGCAGGCAGTGCCCTGCCGCGCGCCCAAAGTGGGCCGCCTCATCTACACAGCGGGCGGTTACTTCCGACAGTCGCT
Keap1	Del 1|0	0	0	0	0	0	0	0	0	0	0	0	0	0	20.9062	0	0	0	0	0	0	0	0	0	0	0	0	CTTCTACGTGCAGGCACTGCTGCGGGCCGTGCGCTGCCATGCGCTCACGCCGCGCTTCCTGCAGACGCAGCTGCAGAAGTGTGAGATCCTGCAGGCCGAC-|CGCGCTGCAAGGACTACCTGGTGCAGATATTCCAGGAGCTCACGCTGCACAAGCCCACGCAGGCAGTGCCCTGCCGCGCGCCCAAAGTGGGCCGCCTCATCTACACAGCGGGCGGTTACTTCCGACAGTCGCT
Keap1	Del 0|12	0	0	0	0	0	0	0	0	0	0	0	0	0	0	0	39.1876	0	0	0	0	0	0	0	0	0	0	CTTCTACGTGCAGGCACTGCTGCGGGCCGTGCGCTGCCATGCGCTCACGCCGCGCTTCCTGCAGACGCAGCTGCAGAAGTGTGAGATCCTGCAGGCCGACG|------------ACTACCTGGTGCAGATATTCCAGGAGCTCACGCTGCACAAGCCCACGCAGGCAGTGCCCTGCCGCGCGCCCAAAGTGGGCCGCCTCATCTACACAGCGGGCGGTTACTTCCGACAGTCGCT
Keap1	Del 0|9	0	0	0	0	0	0	0	0	0	0	0	0	0	0	0	38.2286	0	0	0	0	0	0	0	0	0	0	CTTCTACGTGCAGGCACTGCTGCGGGCCGTGCGCTGCCATGCGCTCACGCCGCGCTTCCTGCAGACGCAGCTGCAGAAGTGTGAGATCCTGCAGGCCGACG|---------AGGACTACCTGGTGCAGATATTCCAGGAGCTCACGCTGCACAAGCCCACGCAGGCAGTGCCCTGCCGCGCGCCCAAAGTGGGCCGCCTCATCTACACAGCGGGCGGTTACTTCCGACAGTCGCT
Keap1	Del 9|10	0	0	0	0	0	0	0	0	0	0	0	0	0	0	0	0	0	0	18.9586	0	0	0	0	0	0	0	CTTCTACGTGCAGGCACTGCTGCGGGCCGTGCGCTGCCATGCGCTCACGCCGCGCTTCCTGCAGACGCAGCTGCAGAAGTGTGAGATCCTGC---------|----------GGACTACCTGGTGCAGATATTCCAGGAGCTCACGCTGCACAAGCCCACGCAGGCAGTGCCCTGCCGCGCGCCCAAAGTGGGCCGCCTCATCTACACAGCGGGCGGTTACTTCCGACAGTCGCT
Keap1	Del 0|6	0	0	0	0	0	0	0	0	0	0	0	0	0	0	0	0	0	0	0	0	16.5482	0	0	0	0	0	CTTCTACGTGCAGGCACTGCTGCGGGCCGTGCGCTGCCATGCGCTCACGCCGCGCTTCCTGCAGACGCAGCTGCAGAAGTGTGAGATCCTGCAGGCCGACG|------GCAAGGACTACCTGGTGCAGATATTCCAGGAGCTCACGCTGCACAAGCCCACGCAGGCAGTGCCCTGCCGCGCGCCCAAAGTGGGCCGCCTCATCTACACAGCGGGCGGTTACTTCCGACAGTCGCT
Keap1	Ins 1 C	0	0	0	0	0	0	0	0	0	0	0	0	0	0	0	0	0	0	0	0	0	24.6439	0	0	0	0	CTTCTACGTGCAGGCACTGCTGCGGGCCGTGCGCTGCCATGCGCTCACGCCGCGCTTCCTGCAGACGCAGCTGCAGAAGTGTGAGATCCTGCAGGCCGACG|{C}CGCGCTGCAAGGACTACCTGGTGCAGATATTCCAGGAGCTCACGCTGCACAAGCCCACGCAGGCAGTGCCCTGCCGCGCGCCCAAAGTGGGCCGCCTCATCTACACAGCGGGCGGTTACTTCCGACAGTCGCT
Kmt2a	WT	29.4756	61.2254	47.4551	28.7131	73.851	50.0795	72.4729	68.4846	38.0685	48.1401	70.1016	100	100	60.3364	76.7481	22.629	23.7219	34.5002	64.0173	100	64.8031	77.6031	58.4226	68.1681	62.4198	60.4212	AGTTGCTGGCTCAGAAGATGCCGAGCCTCTTGCTCCTCCCATCAAACCAATTAAGCCTGTCACCAGAAACAAGGCACCTCAGGAGCCTCCGGTGAAGAAAGGGCGGCGATCA|AGGCGGTGCGGACAATGTCCTGGCTGCCAGGTGCCTGAGGACTGTGGCATTTGCACTAATTGCCTGGACAAGCCCAAGTTTGGTGGCCGCAATATA
Kmt2a	Del 18|0	65.142	0	0	0	0	0	0	0	0	0	0	0	0	0	0	0	0	0	0	0	0	0	0	0	0	0	AGTTGCTGGCTCAGAAGATGCCGAGCCTCTTGCTCCTCCCATCAAACCAATTAAGCCTGTCACCAGAAACAAGGCACCTCAGGAGCCTCCGGTG------------------|AGGCGGTGCGGACAATGTCCTGGCTGCCAGGTGCCTGAGGACTGTGGCATTTGCACTAATTGCCTGGACAAGCCCAAGTTTGGTGGCCGCAATATA
Kmt2a	Del 33|65	5.38235	0	0	0	0	0	0	0	0	0	0	0	0	0	0	0	0	0	0	0	0	0	0	0	0	0	AGTTGCTGGCTCAGAAGATGCCGAGCCTCTTGCTCCTCCCATCAAACCAATTAAGCCTGTCACCAGAAACAAGGCACCT--------------------------------- | -----------------------------------------------------------------GGACAAGCCCAAGTTTGGTGGCCGCAATATA
Kmt2a	Ins 1 A	0	27.725	0	0	0	0	0	0	0	51.8599	0	0	0	0	0	0	0	65.4998	0	0	0	22.3969	15.6733	14.6057	13.5236	17.0172	AGTTGCTGGCTCAGAAGATGCCGAGCCTCTTGCTCCTCCCATCAAACCAATTAAGCCTGTCACCAGAAACAAGGCACCTCAGGAGCCTCCGGTGAAGAAAGGGCGGCGATCA{A}|AGGCGGTGCGGACAATGTCCTGGCTGCCAGGTGCCTGAGGACTGTGGCATTTGCACTAATTGCCTGGACAAGCCCAAGTTTGGTGGCCGCAATATA
Kmt2a	Del 0|3	0	11.0495	0	0	0	0	0	18.3835	0	0	0	0	0	0	0	0	0	0	0	0	0	0	0	0	0	0	AGTTGCTGGCTCAGAAGATGCCGAGCCTCTTGCTCCTCCCATCAAACCAATTAAGCCTGTCACCAGAAACAAGGCACCTCAGGAGCCTCCGGTGAAGAAAGGGCGGCGATCA|---CGGTGCGGACAATGTCCTGGCTGCCAGGTGCCTGAGGACTGTGGCATTTGCACTAATTGCCTGGACAAGCCCAAGTTTGGTGGCCGCAATATA
Kmt2a	Del 17|0	0	0	27.2232	0	0	0	0	0	0	0	0	0	0	0	0	0	0	0	0	0	0	0	0	0	0	0	AGTTGCTGGCTCAGAAGATGCCGAGCCTCTTGCTCCTCCCATCAAACCAATTAAGCCTGTCACCAGAAACAAGGCACCTCAGGAGCCTCCGGTGA-----------------|AGGCGGTGCGGACAATGTCCTGGCTGCCAGGTGCCTGAGGACTGTGGCATTTGCACTAATTGCCTGGACAAGCCCAAGTTTGGTGGCCGCAATATA
Kmt2a	Del 7|0	0	0	25.3217	0	0	0	0	0	0	0	0	0	0	0	0	0	0	0	0	0	0	0	0	0	0	0	AGTTGCTGGCTCAGAAGATGCCGAGCCTCTTGCTCCTCCCATCAAACCAATTAAGCCTGTCACCAGAAACAAGGCACCTCAGGAGCCTCCGGTGAAGAAAGGGCG-------|AGGCGGTGCGGACAATGTCCTGGCTGCCAGGTGCCTGAGGACTGTGGCATTTGCACTAATTGCCTGGACAAGCCCAAGTTTGGTGGCCGCAATATA
Kmt2a	Del 1|0	0	0	0	36.8543	0	16.7195	0	0	30.6077	0	15.1984	0	0	0	0	38.016	0	0	0	0	18.6315	0	5.34787	1.32689	7.73793	6.04615	AGTTGCTGGCTCAGAAGATGCCGAGCCTCTTGCTCCTCCCATCAAACCAATTAAGCCTGTCACCAGAAACAAGGCACCTCAGGAGCCTCCGGTGAAGAAAGGGCGGCGATC-|AGGCGGTGCGGACAATGTCCTGGCTGCCAGGTGCCTGAGGACTGTGGCATTTGCACTAATTGCCTGGACAAGCCCAAGTTTGGTGGCCGCAATATA
Kmt2a	Del 4|2	0	0	0	34.4325	0	0	0	0	0	0	0	0	0	0	0	0	0	0	0	0	0	0	0	0	0	0	AGTTGCTGGCTCAGAAGATGCCGAGCCTCTTGCTCCTCCCATCAAACCAATTAAGCCTGTCACCAGAAACAAGGCACCTCAGGAGCCTCCGGTGAAGAAAGGGCGGCG---- | --GCGGTGCGGACAATGTCCTGGCTGCCAGGTGCCTGAGGACTGTGGCATTTGCACTAATTGCCTGGACAAGCCCAAGTTTGGTGGCCGCAATATA
Kmt2a	Del 8|0	0	0	0	0	13.6373	0	0	0	0	0	0	0	0	0	0	0	0	0	0	0	0	0	0	0	0	0	AGTTGCTGGCTCAGAAGATGCCGAGCCTCTTGCTCCTCCCATCAAACCAATTAAGCCTGTCACCAGAAACAAGGCACCTCAGGAGCCTCCGGTGAAGAAAGGG--------A|AGGCGGTGCGGACAATGTCCTGGCTGCCAGGTGCCTGAGGACTGTGGCATTTGCACTAATTGCCTGGACAAGCCCAAGTTTGGTGGCCGCAATATA
Kmt2a	Del 4|0	0	0	0	0	12.5117	16.2351	13.4293	13.1319	0	0	0	0	0	0	0	39.355	0	0	0	0	0	0	0	0	0	0	AGTTGCTGGCTCAGAAGATGCCGAGCCTCTTGCTCCTCCCATCAAACCAATTAAGCCTGTCACCAGAAACAAGGCACCTCAGGAGCCTCCGGTGAAGAAAGGGCGGCG----|AGGCGGTGCGGACAATGTCCTGGCTGCCAGGTGCCTGAGGACTGTGGCATTTGCACTAATTGCCTGGACAAGCCCAAGTTTGGTGGCCGCAATATA
Kmt2a	Del 2|0	0	0	0	0	0	16.9659	0	0	31.3238	0	0	0	0	0	0	0	0	0	0	0	0	0	0	0	0	0	AGTTGCTGGCTCAGAAGATGCCGAGCCTCTTGCTCCTCCCATCAAACCAATTAAGCCTGTCACCAGAAACAAGGCACCTCAGGAGCCTCCGGTGAAGAAAGGGCGGCGA--A|AGGCGGTGCGGACAATGTCCTGGCTGCCAGGTGCCTGAGGACTGTGGCATTTGCACTAATTGCCTGGACAAGCCCAAGTTTGGTGGCCGCAATATA
Kmt2a	Del 13|0	0	0	0	0	0	0	14.0979	0	0	0	0	0	0	0	0	0	0	0	0	0	0	0	0	0	0	0	AGTTGCTGGCTCAGAAGATGCCGAGCCTCTTGCTCCTCCCATCAAACCAATTAAGCCTGTCACCAGAAACAAGGCACCTCAGGAGCCTCCGGTGAAGAA-------------|AGGCGGTGCGGACAATGTCCTGGCTGCCAGGTGCCTGAGGACTGTGGCATTTGCACTAATTGCCTGGACAAGCCCAAGTTTGGTGGCCGCAATATA
Kmt2a	Del 4|4	0	0	0	0	0	0	0	0	0	0	14.7	0	0	0	0	0	0	0	0	0	0	0	0	0	0	0	AGTTGCTGGCTCAGAAGATGCCGAGCCTCTTGCTCCTCCCATCAAACCAATTAAGCCTGTCACCAGAAACAAGGCACCTCAGGAGCCTCCGGTGAAGAAAGGGCGGCG---- | ----CGGTGCGGACAATGTCCTGGCTGCCAGGTGCCTGAGGACTGTGGCATTTGCACTAATTGCCTGGACAAGCCCAAGTTTGGTGGCCGCAATATA
Kmt2a	Del 3|0	0	0	0	0	0	0	0	0	0	0	0	0	0	20.4264	23.2519	0	0	0	14.3906	0	0	0	20.5563	15.8993	16.3186	16.5154	AGTTGCTGGCTCAGAAGATGCCGAGCCTCTTGCTCCTCCCATCAAACCAATTAAGCCTGTCACCAGAAACAAGGCACCTCAGGAGCCTCCGGTGAAGAAAGGGCGGCGA---|AGGCGGTGCGGACAATGTCCTGGCTGCCAGGTGCCTGAGGACTGTGGCATTTGCACTAATTGCCTGGACAAGCCCAAGTTTGGTGGCCGCAATATA
Kmt2a	Del 4|5	0	0	0	0	0	0	0	0	0	0	0	0	0	19.2372	0	0	0	0	0	0	0	0	0	0	0	0	AGTTGCTGGCTCAGAAGATGCCGAGCCTCTTGCTCCTCCCATCAAACCAATTAAGCCTGTCACCAGAAACAAGGCACCTCAGGAGCCTCCGGTGAAGAAAGGGCGGCG---- | -----GTGCGGACAATGTCCTGGCTGCCAGGTGCCTGAGGACTGTGGCATTTGCACTAATTGCCTGGACAAGCCCAAGTTTGGTGGCCGCAATATA
Kmt2a	Del 3|0	0	0	0	0	0	0	0	0	0	0	0	0	0	0	0	0	38.2754	0	0	0	0	0	0	0	0	0	AGTTGCTGGCTCAGAAGATGCCGAGCCTCTTGCTCCTCCCATCAAACCAATTAAGCCTGTCACCAGAAACAAGGCACCTCAGGAGCCTCCGGTGAAGAAAGGGCGG---TCA|AGGCGGTGCGGACAATGTCCTGGCTGCCAGGTGCCTGAGGACTGTGGCATTTGCACTAATTGCCTGGACAAGCCCAAGTTTGGTGGCCGCAATATA
Kmt2a	Del 4|0	0	0	0	0	0	0	0	0	0	0	0	0	0	0	0	0	38.0027	0	0	0	0	0	0	0	0	0	AGTTGCTGGCTCAGAAGATGCCGAGCCTCTTGCTCCTCCCATCAAACCAATTAAGCCTGTCACCAGAAACAAGGCACCTCAGGAGCCTCCGGTGAAGAAAGGGCGGC----A|AGGCGGTGCGGACAATGTCCTGGCTGCCAGGTGCCTGAGGACTGTGGCATTTGCACTAATTGCCTGGACAAGCCCAAGTTTGGTGGCCGCAATATA
Kmt2a	Del 24|25	0	0	0	0	0	0	0	0	0	0	0	0	0	0	0	0	0	0	14.9996	0	0	0	0	0	0	0	AGTTGCTGGCTCAGAAGATGCCGAGCCTCTTGCTCCTCCCATCAAACCAATTAAGCCTGTCACCAGAAACAAGGCACCTCAGGAGCCT------------------------ | -------------------------GCCAGGTGCCTGAGGACTGTGGCATTTGCACTAATTGCCTGGACAAGCCCAAGTTTGGTGGCCGCAATATA
Kmt2a	Del 22|27	0	0	0	0	0	0	0	0	0	0	0	0	0	0	0	0	0	0	6.59256	0	0	0	0	0	0	0	AGTTGCTGGCTCAGAAGATGCCGAGCCTCTTGCTCCTCCCATCAAACCAATTAAGCCTGTCACCAGAAACAAGGCACCTCAGGAGCCTCC---------------------- | ---------------------------CAGGTGCCTGAGGACTGTGGCATTTGCACTAATTGCCTGGACAAGCCCAAGTTTGGTGGCCGCAATATA
Kmt2a	Del 5|0	0	0	0	0	0	0	0	0	0	0	0	0	0	0	0	0	0	0	0	0	16.5655	0	0	0	0	0	AGTTGCTGGCTCAGAAGATGCCGAGCCTCTTGCTCCTCCCATCAAACCAATTAAGCCTGTCACCAGAAACAAGGCACCTCAGGAGCCTCCGGTGAAGAAAGGGCGGC-----|AGGCGGTGCGGACAATGTCCTGGCTGCCAGGTGCCTGAGGACTGTGGCATTTGCACTAATTGCCTGGACAAGCCCAAGTTTGGTGGCCGCAATATA
Kmt2c	WT	51.5608	65.2734	49.4448	62.4732	78.4721	73.9017	79.4985	73.4212	79.3884	70.6306	100	35.1786	100	100	79.8622	26.6895	27.9657	100	100	61.4222	71.8738	100	89.2962	98.1192	91.3683	87.6435	CTCATGCCAAACCAGGATCCTTTTTTGCAAGCAGCACAAAACCGAGTACCAGGTTTACCTGGCCCTTTGATAAGGCCACCTGATACATGCTCCCAGACTCCCAGGCCACCTGGGCCTGGC|CGTATAGACACATTCACTCATGCTTCCTCATCTGCTGTTCGTGATCCATATGATCAGCCTCCAGTGACTCCCAGGCCTCATTCTGAGTCTTTCG
Kmt2c	Del 0|7 (D9 I2CG)	42.303	0	0	0	0	0	5.97813	2.59968	0	0	0	0	0	0	0	0	0	0	0	0	0	0	0	0	0	0	CTCATGCCAAACCAGGATCCTTTTTTGCAAGCAGCACAAAACCGAGTACCAGGTTTACCTGGCCCTTTGATAAGGCCACCTGATACATGCTCCCAGACTCCCAGGCCACCTGGGCCTGGC|CG-------ACATTCACTCATGCTTCCTCATCTGCTGTTCGTGATCCATATGATCAGCCTCCAGTGACTCCCAGGCCTCATTCTGAGTCTTTCG
Kmt2c	Del 1|0	6.13617	8.63362	0	0	0	26.0983	14.5234	0	0	0	0	32.9403	0	0	20.1378	36.0762	39.396	0	0	0	14.4176	0	5.56369	1.12999	5.75974	7.63786	CTCATGCCAAACCAGGATCCTTTTTTGCAAGCAGCACAAAACCGAGTACCAGGTTTACCTGGCCCTTTGATAAGGCCACCTGATACATGCTCCCAGACTCCCAGGCCACCTGGGCCTGG-|CGTATAGACACATTCACTCATGCTTCCTCATCTGCTGTTCGTGATCCATATGATCAGCCTCCAGTGACTCCCAGGCCTCATTCTGAGTCTTTCG
Kmt2c	Del 0|2	0	8.98946	0	0	0	0	0	0	0	0	0	0	0	0	0	0	0	0	0	0	0	0	0	0	0	0	CTCATGCCAAACCAGGATCCTTTTTTGCAAGCAGCACAAAACCGAGTACCAGGTTTACCTGGCCCTTTGATAAGGCCACCTGATACATGCTCCCAGACTCCCAGGCCACCTGGGCCTGGC|--TATAGACACATTCACTCATGCTTCCTCATCTGCTGTTCGTGATCCATATGATCAGCCTCCAGTGACTCCCAGGCCTCATTCTGAGTCTTTCG
Kmt2c	Del 2|0	0	8.9076	0	0	0	0	0	0	0	0	0	0	0	0	0	0	0	0	0	0	0	0	0	0	0	0	CTCATGCCAAACCAGGATCCTTTTTTGCAAGCAGCACAAAACCGAGTACCAGGTTTACCTGGCCCTTTGATAAGGCCACCTGATACATGCTCCCAGACTCCCAGGCCACCTGGGCCTG--|CGTATAGACACATTCACTCATGCTTCCTCATCTGCTGTTCGTGATCCATATGATCAGCCTCCAGTGACTCCCAGGCCTCATTCTGAGTCTTTCG
Kmt2c	Del 0|13	0	8.19593	0	0	0	0	0	0	0	0	0	0	0	0	0	0	0	0	0	0	0	0	0	0	0	0	CTCATGCCAAACCAGGATCCTTTTTTGCAAGCAGCACAAAACCGAGTACCAGGTTTACCTGGCCCTTTGATAAGGCCACCTGATACATGCTCCCAGACTCCCAGGCCACCTGGGCCTGGC|-------------TCACTCATGCTTCCTCATCTGCTGTTCGTGATCCATATGATCAGCCTCCAGTGACTCCCAGGCCTCATTCTGAGTCTTTCG
Kmt2c	Del 1|2	0	0	25.681	0	0	0	0	0	0	0	0	0	0	0	0	0	0	0	0	0	0	0	0	0	0	0	CTCATGCCAAACCAGGATCCTTTTTTGCAAGCAGCACAAAACCGAGTACCAGGTTTACCTGGCCCTTTGATAAGGCCACCTGATACATGCTCCCAGACTCCCAGGCCACCTGGGCCTGG-|--TATAGACACATTCACTCATGCTTCCTCATCTGCTGTTCGTGATCCATATGATCAGCCTCCAGTGACTCCCAGGCCTCATTCTGAGTCTTTCG
Kmt2c	Del 0|3	0	0	24.8742	0	10.5963	0	0	0	0	0	0	0	0	0	0	0	0	0	0	0	0	0	0	0	0	0	CTCATGCCAAACCAGGATCCTTTTTTGCAAGCAGCACAAAACCGAGTACCAGGTTTACCTGGCCCTTTGATAAGGCCACCTGATACATGCTCCCAGACTCCCAGGCCACCTGGGCCTGGC|---ATAGACACATTCACTCATGCTTCCTCATCTGCTGTTCGTGATCCATATGATCAGCCTCCAGTGACTCCCAGGCCTCATTCTGAGTCTTTCG
Kmt2c	Del 0|21	0	0	0	37.5268	0	0	0	0	0	0	0	0	0	0	0	0	0	0	0	0	0	0	0	0	0	0	CTCATGCCAAACCAGGATCCTTTTTTGCAAGCAGCACAAAACCGAGTACCAGGTTTACCTGGCCCTTTGATAAGGCCACCTGATACATGCTCCCAGACTCCCAGGCCACCTGGGCCTGGC|---------------------GCTTCCTCATCTGCTGTTCGTGATCCATATGATCAGCCTCCAGTGACTCCCAGGCCTCATTCTGAGTCTTTCG
Kmt2c	Del 3|5	0	0	0	0	10.9316	0	0	0	0	0	0	31.881	0	0	0	0	0	0	0	0	0	0	0	0	0	0	CTCATGCCAAACCAGGATCCTTTTTTGCAAGCAGCACAAAACCGAGTACCAGGTTTACCTGGCCCTTTGATAAGGCCACCTGATACATGCTCCCAGACTCCCAGGCCACCTGGGCCT--- | -----AGACACATTCACTCATGCTTCCTCATCTGCTGTTCGTGATCCATATGATCAGCCTCCAGTGACTCCCAGGCCTCATTCTGAGTCTTTCG
Kmt2c	Del 3|14	0	0	0	0	0	0	0	23.9791	20.6116	0	0	0	0	0	0	0	0	0	0	0	0	0	0	0	0	0	CTCATGCCAAACCAGGATCCTTTTTTGCAAGCAGCACAAAACCGAGTACCAGGTTTACCTGGCCCTTTGATAAGGCCACCTGATACATGCTCCCAGACTCCCAGGCCACCTGGGCCT--- | --------------CACTCATGCTTCCTCATCTGCTGTTCGTGATCCATATGATCAGCCTCCAGTGACTCCCAGGCCTCATTCTGAGTCTTTCG
Kmt2c	Del 5|3	0	0	0	0	0	0	0	0	0	29.3694	0	0	0	0	0	0	0	0	0	0	0	0	0	0	0	0	CTCATGCCAAACCAGGATCCTTTTTTGCAAGCAGCACAAAACCGAGTACCAGGTTTACCTGGCCCTTTGATAAGGCCACCTGATACATGCTCCCAGACTCCCAGGCCACCTGGGC----- | ---ATAGACACATTCACTCATGCTTCCTCATCTGCTGTTCGTGATCCATATGATCAGCCTCCAGTGACTCCCAGGCCTCATTCTGAGTCTTTCG
Kmt2c	Del 0|14	0	0	0	0	0	0	0	0	0	0	0	0	0	0	0	37.2343	0	0	0	0	0	0	0	0	0	0	CTCATGCCAAACCAGGATCCTTTTTTGCAAGCAGCACAAAACCGAGTACCAGGTTTACCTGGCCCTTTGATAAGGCCACCTGATACATGCTCCCAGACTCCCAGGCCACCTGGGCCTGGC|--------------CACTCATGCTTCCTCATCTGCTGTTCGTGATCCATATGATCAGCCTCCAGTGACTCCCAGGCCTCATTCTGAGTCTTTCG
Kmt2c	Del 3|0 Ins 17bp	0	0	0	0	0	0	0	0	0	0	0	0	0	0	0	0	32.6382	0	0	0	0	0	0	0	0	0	CTCATGCCAAACCAGGATCCTTTTTTGCAAGCAGCACAAAACCGAGTACCAGGTTTACCTGGCCCTTTGATAAGGCCACCTGATACATGCTCCCAGACTCCCAGGCCACCTGGGCCT---{CAGTGAGCGAGCGAGCG}|CGTATAGACACATTCACTCATGCTTCCTCATCTGCTGTTCGTGATCCATATGATCAGCCTCCAGTGACTCCCAGGCCTCATTCTGAGTCTTTCG
Kmt2c	Del 29|36	0	0	0	0	0	0	0	0	0	0	0	0	0	0	0	0	0	0	0	12.5464	0	0	0	0	0	0	CTCATGCCAAACCAGGATCCTTTTTTGCAAGCAGCACAAAACCGAGTACCAGGTTTACCTGGCCCTTTGATAAGGCCACCTGATACATGCT----------------------------- | ------------------------------------GTTCGTGATCCATATGATCAGCCTCCAGTGACTCCCAGGCCTCATTCTGAGTCTTTCG
Kmt2c	Del 20|19	0	0	0	0	0	0	0	0	0	0	0	0	0	0	0	0	0	0	0	10.3464	0	0	0	0	0	0	CTCATGCCAAACCAGGATCCTTTTTTGCAAGCAGCACAAAACCGAGTACCAGGTTTACCTGGCCCTTTGATAAGGCCACCTGATACATGCTCCCAGACTC-------------------- | -------------------ATGCTTCCTCATCTGCTGTTCGTGATCCATATGATCAGCCTCCAGTGACTCCCAGGCCTCATTCTGAGTCTTTCG
Kmt2c	Del 55|47	0	0	0	0	0	0	0	0	0	0	0	0	0	0	0	0	0	0	0	9.66059	0	0	0	0	0	0	CTCATGCCAAACCAGGATCCTTTTTTGCAAGCAGCACAAAACCGAGTACCAGGTTTACCTGGCCC------------------------------------------------------- | -----------------------------------------------ATATGATCAGCCTCCAGTGACTCCCAGGCCTCATTCTGAGTCTTTCG
Kmt2c	Del 39|28	0	0	0	0	0	0	0	0	0	0	0	0	0	0	0	0	0	0	0	6.02442	0	0	0	0	0	0	CTCATGCCAAACCAGGATCCTTTTTTGCAAGCAGCACAAAACCGAGTACCAGGTTTACCTGGCCCTTTGATAAGGCCACCT--------------------------------------- | ----------------------------CATCTGCTGTTCGTGATCCATATGATCAGCCTCCAGTGACTCCCAGGCCTCATTCTGAGTCTTTCG
Kmt2c	Del 0|10	0	0	0	0	0	0	0	0	0	0	0	0	0	0	0	0	0	0	0	0	13.7087	0	0	0	0	0	CTCATGCCAAACCAGGATCCTTTTTTGCAAGCAGCACAAAACCGAGTACCAGGTTTACCTGGCCCTTTGATAAGGCCACCTGATACATGCTCCCAGACTCCCAGGCCACCTGGGCCTGGC|----------CATTCACTCATGCTTCCTCATCTGCTGTTCGTGATCCATATGATCAGCCTCCAGTGACTCCCAGGCCTCATTCTGAGTCTTTCG
Kmt2c	Del 0|6	0	0	0	0	0	0	0	0	0	0	0	0	0	0	0	0	0	0	0	0	0	0	5.14011	0.750776	2.87198	4.71864	CTCATGCCAAACCAGGATCCTTTTTTGCAAGCAGCACAAAACCGAGTACCAGGTTTACCTGGCCCTTTGATAAGGCCACCTGATACATGCTCCCAGACTCCCAGGCCACCTGGGCCTGGC|C------ACACATTCACTCATGCTTCCTCATCTGCTGTTCGTGATCCATATGATCAGCCTCCAGTGACTCCCAGGCCTCATTCTGAGTCTTTCG
Lkb1	WT	19.5748	59.1357	47.9433	29.3633	89.363	47.4649	67.3047	65.9866	36.4267	44.1377	70.2092	32.2257	12.1941	55.6252	69.2827	24.1278	25.0162	40.715	72.6638	57.8154	68.0594	78.1412	77.1321	88.0353	62.3965	60.0014	ATCGACTCCACCGAGGTAATCTACCAGCCGCGCCGCAAACGCGCCAAGCTCATCGGCAAGTACCTGATGGGGGACCTGCTCGGGGAGGGCTCGTACG|GCAAGGTGAAGGAGGTGCTGGACTCCGAGACCTTATGCCGCAGGGCGGTCAAGATCCTCAAGAAGAAAAAGCTGCGCAGGATCCCCAATGGAGAGGCCAACGTCAAGAAGTA
Lkb1	Del 63|0	56.1651	0	0	0	0	0	6.11596	0	0	0	0	0	0	0	0	0	0	0	0	0	0	0	0	0	0	0	ATCGACTCCACCGAGGTAATCTACCAGCCGCGCCGCAAACGCGCC---------------------------------------------------------------|GCAAGGTGAAGGAGGTGCTGGACTCCGAGACCTTATGCCGCAGGGCGGTCAAGATCCTCAAGAAGAAAAAGCTGCGCAGGATCCCCAATGGAGAGGCCAACGTCAAGAAGTA
Lkb1	Del 1|0	24.2601	18.8181	0	0	0	0	0	0	0	0	0	0	0	0	0	0	0	19.4797	0	0	0	0	0	0	0	0	ATCGACTCCACCGAGGTAATCTACCAGCCGCGCCGCAAACGCGCCAAGCTCATCGGCAAGTACCTGATGGGGGACCTGCTCGGGGAGGGCTCGTA-G|GCAAGGTGAAGGAGGTGCTGGACTCCGAGACCTTATGCCGCAGGGCGGTCAAGATCCTCAAGAAGAAAAAGCTGCGCAGGATCCCCAATGGAGAGGCCAACGTCAAGAAGTA
Lkb1	Del 4|0	0	12.5447	23.4481	34.2836	10.637	0	0	18.5559	63.5733	55.8623	0	0	44.7013	0	0	75.8722	0	0	13.8919	8.03281	15.7082	0	4.96229	3.52899	8.29906	11.8178	ATCGACTCCACCGAGGTAATCTACCAGCCGCGCCGCAAACGCGCCAAGCTCATCGGCAAGTACCTGATGGGGGACCTGCTCGGGGAGGGCTCG----|GCAAGGTGAAGGAGGTGCTGGACTCCGAGACCTTATGCCGCAGGGCGGTCAAGATCCTCAAGAAGAAAAAGCTGCGCAGGATCCCCAATGGAGAGGCCAACGTCAAGAAGTA
Lkb1	Del 2|0	0	9.5015	0	36.353	0	0	0	0	0	0	0	0	0	0	17.21	0	0	0	0	0	0	0	0	0	0	0	ATCGACTCCACCGAGGTAATCTACCAGCCGCGCCGCAAACGCGCCAAGCTCATCGGCAAGTACCTGATGGGGGACCTGCTCGGGGAGGGCTCGT--G|GCAAGGTGAAGGAGGTGCTGGACTCCGAGACCTTATGCCGCAGGGCGGTCAAGATCCTCAAGAAGAAAAAGCTGCGCAGGATCCCCAATGGAGAGGCCAACGTCAAGAAGTA
Lkb1	Del 15|0	0	0	28.6085	0	0	0	0	0	0	0	0	0	0	0	0	0	0	0	0	0	0	0	0	0	0	0	ATCGACTCCACCGAGGTAATCTACCAGCCGCGCCGCAAACGCGCCAAGCTCATCGGCAAGTACCTGATGGGGGACCTGCTCG---------------|GCAAGGTGAAGGAGGTGCTGGACTCCGAGACCTTATGCCGCAGGGCGGTCAAGATCCTCAAGAAGAAAAAGCTGCGCAGGATCCCCAATGGAGAGGCCAACGTCAAGAAGTA
Lkb1	Del 19|0	0	0	0	0	0	30.1198	0	0	0	0	0	0	0	0	0	0	0	0	0	0	0	0	0	0	0	0	ATCGACTCCACCGAGGTAATCTACCAGCCGCGCCGCAAACGCGCCAAGCTCATCGGCAAGTACCTGATGGGGGACC--------------------G|GCAAGGTGAAGGAGGTGCTGGACTCCGAGACCTTATGCCGCAGGGCGGTCAAGATCCTCAAGAAGAAAAAGCTGCGCAGGATCCCCAATGGAGAGGCCAACGTCAAGAAGTA
Lkb1	Del 6|0	0	0	0	0	0	22.4154	0	0	0	0	0	0	0	0	0	0	0	0	0	0	0	0	0	0	0	0	ATCGACTCCACCGAGGTAATCTACCAGCCGCGCCGCAAACGCGCCAAGCTCATCGGCAAGTACCTGATGGGGGACCTGCTCGGGGAGGGC------G|GCAAGGTGAAGGAGGTGCTGGACTCCGAGACCTTATGCCGCAGGGCGGTCAAGATCCTCAAGAAGAAAAAGCTGCGCAGGATCCCCAATGGAGAGGCCAACGTCAAGAAGTA
Lkb1	Del 19|8	0	0	0	0	0	0	14.1198	0	0	0	0	0	0	0	0	0	0	0	0	0	0	0	0	0	0	0	ATCGACTCCACCGAGGTAATCTACCAGCCGCGCCGCAAACGCGCCAAGCTCATCGGCAAGTACCTGATGGGGGACCTG------------------- | --------AAGGAGGTGCTGGACTCCGAGACCTTATGCCGCAGGGCGGTCAAGATCCTCAAGAAGAAAAAGCTGCGCAGGATCCCCAATGGAGAGGCCAACGTCAAGAAGTA
Lkb1	Del 11|9	0	0	0	0	0	0	12.4595	0	0	0	0	0	0	0	0	0	0	0	0	0	0	0	0	0	0	0	ATCGACTCCACCGAGGTAATCTACCAGCCGCGCCGCAAACGCGCCAAGCTCATCGGCAAGTACCTGATGGGGGACCTGCTCGGGGA----------- | ---------AGGAGGTGCTGGACTCCGAGACCTTATGCCGCAGGGCGGTCAAGATCCTCAAGAAGAAAAAGCTGCGCAGGATCCCCAATGGAGAGGCCAACGTCAAGAAGTA
Lkb1	Del 3|0	0	0	0	0	0	0	0	15.4575	0	0	0	0	0	0	0	0	0	0	0	0	0	0	0	0	0	0	ATCGACTCCACCGAGGTAATCTACCAGCCGCGCCGCAAACGCGCCAAGCTCATCGGCAAGTACCTGATGGGGGACCTGCTCGGGGAGGGCTCGT---|GCAAGGTGAAGGAGGTGCTGGACTCCGAGACCTTATGCCGCAGGGCGGTCAAGATCCTCAAGAAGAAAAAGCTGCGCAGGATCCCCAATGGAGAGGCCAACGTCAAGAAGTA
Lkb1	Del 10|12	0	0	0	0	0	0	0	0	0	0	15.3125	0	0	0	0	0	0	0	0	0	0	0	0	0	0	0	ATCGACTCCACCGAGGTAATCTACCAGCCGCGCCGCAAACGCGCCAAGCTCATCGGCAAGTACCTGATGGGGGACCTGCTCGGGGAG---------- | ------------AGGTGCTGGACTCCGAGACCTTATGCCGCAGGGCGGTCAAGATCCTCAAGAAGAAAAAGCTGCGCAGGATCCCCAATGGAGAGGCCAACGTCAAGAAGTA
Lkb1	Del 10|0	0	0	0	0	0	0	0	0	0	0	14.4783	0	0	0	0	0	0	0	0	0	0	0	0	0	0	0	ATCGACTCCACCGAGGTAATCTACCAGCCGCGCCGCAAACGCGCCAAGCTCATCGGCAAGTACCTGATGGGGGACCTGCTCGGGGAG----------|GCAAGGTGAAGGAGGTGCTGGACTCCGAGACCTTATGCCGCAGGGCGGTCAAGATCCTCAAGAAGAAAAAGCTGCGCAGGATCCCCAATGGAGAGGCCAACGTCAAGAAGTA
Lkb1	Del 0|8	0	0	0	0	0	0	0	0	0	0	0	33.4967	0	0	0	0	0	19.6242	0	0	0	0	0	0	0	0	ATCGACTCCACCGAGGTAATCTACCAGCCGCGCCGCAAACGCGCCAAGCTCATCGGCAAGTACCTGATGGGGGACCTGCTCGGGGAGGGCTCGTACG|--------AAGGAGGTGCTGGACTCCGAGACCTTATGCCGCAGGGCGGTCAAGATCCTCAAGAAGAAAAAGCTGCGCAGGATCCCCAATGGAGAGGCCAACGTCAAGAAGTA
Lkb1	Del 8|0	0	0	0	0	0	0	0	0	0	0	0	34.2776	0	0	0	0	0	0	0	0	0	0	0	0	0	0	ATCGACTCCACCGAGGTAATCTACCAGCCGCGCCGCAAACGCGCCAAGCTCATCGGCAAGTACCTGATGGGGGACCTGCTCGGGGAGGG--------|GCAAGGTGAAGGAGGTGCTGGACTCCGAGACCTTATGCCGCAGGGCGGTCAAGATCCTCAAGAAGAAAAAGCTGCGCAGGATCCCCAATGGAGAGGCCAACGTCAAGAAGTA
Lkb1	Del 1|0	0	0	0	0	0	0	0	0	0	0	0	0	43.1046	19.177	0	0	0	0	0	13.4313	0	0	0	0	0	0	ATCGACTCCACCGAGGTAATCTACCAGCCGCGCCGCAAACGCGCCAAGCTCATCGGCAAGTACCTGATGGGGGACCTGCTCGGGGAGGGCTCGTAC-|GCAAGGTGAAGGAGGTGCTGGACTCCGAGACCTTATGCCGCAGGGCGGTCAAGATCCTCAAGAAGAAAAAGCTGCGCAGGATCCCCAATGGAGAGGCCAACGTCAAGAAGTA
Lkb1	Del 21|2	0	0	0	0	0	0	0	0	0	0	0	0	0	25.1978	0	0	0	0	0	0	0	0	0	0	0	0	ATCGACTCCACCGAGGTAATCTACCAGCCGCGCCGCAAACGCGCCAAGCTCATCGGCAAGTACCTGATGGGGGACC--------------------- | --AAGGTGAAGGAGGTGCTGGACTCCGAGACCTTATGCCGCAGGGCGGTCAAGATCCTCAAGAAGAAAAAGCTGCGCAGGATCCCCAATGGAGAGGCCAACGTCAAGAAGTA
Lkb1	Del 9|0	0	0	0	0	0	0	0	0	0	0	0	0	0	0	13.5073	0	0	0	0	14.7064	0	0	3.72486	0.153822	5.04373	0.325338	ATCGACTCCACCGAGGTAATCTACCAGCCGCGCCGCAAACGCGCCAAGCTCATCGGCAAGTACCTGATGGGGGACCTGCTCGGGGAGG---------|GCAAGGTGAAGGAGGTGCTGGACTCCGAGACCTTATGCCGCAGGGCGGTCAAGATCCTCAAGAAGAAAAAGCTGCGCAGGATCCCCAATGGAGAGGCCAACGTCAAGAAGTA
Lkb1	Del 13|0	0	0	0	0	0	0	0	0	0	0	0	0	0	0	0	0	39.4752	0	0	0	0	0	0	0	0	0	ATCGACTCCACCGAGGTAATCTACCAGCCGCGCCGCAAACGCGCCAAGCTCATCGGCAAGTACCTGATGGGGGACCTGCTCGGG-------------|GCAAGGTGAAGGAGGTGCTGGACTCCGAGACCTTATGCCGCAGGGCGGTCAAGATCCTCAAGAAGAAAAAGCTGCGCAGGATCCCCAATGGAGAGGCCAACGTCAAGAAGTA
Lkb1	Del 2|0	0	0	0	0	0	0	0	0	0	0	0	0	0	0	0	0	35.5086	0	0	0	0	0	0	0	0	0	ATCGACTCCACCGAGGTAATCTACCAGCCGCGCCGCAAACGCGCCAAGCTCATCGGCAAGTACCTGATGGGGGACCTGCTCGGGGAGGGCTCG--CG|GCAAGGTGAAGGAGGTGCTGGACTCCGAGACCTTATGCCGCAGGGCGGTCAAGATCCTCAAGAAGAAAAAGCTGCGCAGGATCCCCAATGGAGAGGCCAACGTCAAGAAGTA
Lkb1	Del 0|2	0	0	0	0	0	0	0	0	0	0	0	0	0	0	0	0	0	20.1811	0	0	0	0	0	0	0	0	ATCGACTCCACCGAGGTAATCTACCAGCCGCGCCGCAAACGCGCCAAGCTCATCGGCAAGTACCTGATGGGGGACCTGCTCGGGGAGGGCTCGTACG|--AAGGTGAAGGAGGTGCTGGACTCCGAGACCTTATGCCGCAGGGCGGTCAAGATCCTCAAGAAGAAAAAGCTGCGCAGGATCCCCAATGGAGAGGCCAACGTCAAGAAGTA
Lkb1	Del 4|5	0	0	0	0	0	0	0	0	0	0	0	0	0	0	0	0	0	0	13.4444	0	0	0	0	0	0	0	ATCGACTCCACCGAGGTAATCTACCAGCCGCGCCGCAAACGCGCCAAGCTCATCGGCAAGTACCTGATGGGGGACCTGCTCGGGGAGGGCTCG---- | -----GTGAAGGAGGTGCTGGACTCCGAGACCTTATGCCGCAGGGCGGTCAAGATCCTCAAGAAGAAAAAGCTGCGCAGGATCCCCAATGGAGAGGCCAACGTCAAGAAGTA
Lkb1	Del 0|5	0	0	0	0	0	0	0	0	0	0	0	0	0	0	0	0	0	0	0	6.0141	0	0	0	0	0	0	ATCGACTCCACCGAGGTAATCTACCAGCCGCGCCGCAAACGCGCCAAGCTCATCGGCAAGTACCTGATGGGGGACCTGCTCGGGGAGGGCTCGTACG|-----GTGAAGGAGGTGCTGGACTCCGAGACCTTATGCCGCAGGGCGGTCAAGATCCTCAAGAAGAAAAAGCTGCGCAGGATCCCCAATGGAGAGGCCAACGTCAAGAAGTA
Lkb1	Del 3|0	0	0	0	0	0	0	0	0	0	0	0	0	0	0	0	0	0	0	0	0	16.2325	0	0	0	0	0	ATCGACTCCACCGAGGTAATCTACCAGCCGCGCCGCAAACGCGCCAAGCTCATCGGCAAGTACCTGATGGGGGACCTGCTCGGGGAGGGCTCG---G|GCAAGGTGAAGGAGGTGCTGGACTCCGAGACCTTATGCCGCAGGGCGGTCAAGATCCTCAAGAAGAAAAAGCTGCGCAGGATCCCCAATGGAGAGGCCAACGTCAAGAAGTA
Lkb1	Del 3|0	0	0	0	0	0	0	0	0	0	0	0	0	0	0	0	0	0	0	0	0	0	21.8588	0	0	0	0	ATCGACTCCACCGAGGTAATCTACCAGCCGCGCCGCAAACGCGCCAAGCTCATCGGCAAGTACCTGATGGGGGACCTGCTCGGGGAGGGCTC---CG|GCAAGGTGAAGGAGGTGCTGGACTCCGAGACCTTATGCCGCAGGGCGGTCAAGATCCTCAAGAAGAAAAAGCTGCGCAGGATCCCCAATGGAGAGGCCAACGTCAAGAAGTA
Lkb1	Ins 1 G	0	0	0	0	0	0	0	0	0	0	0	0	0	0	0	0	0	0	0	0	0	0	5.59758	4.69938	9.94559	14.2392	ATCGACTCCACCGAGGTAATCTACCAGCCGCGCCGCAAACGCGCCAAGCTCATCGGCAAGTACCTGATGGGGGACCTGCTCGGGGAGGGCTCGTACG{G}|GCAAGGTGAAGGAGGTGCTGGACTCCGAGACCTTATGCCGCAGGGCGGTCAAGATCCTCAAGAAGAAAAAGCTGCGCAGGATCCCCAATGGAGAGGCCAACGTCAAGAAGTA
Lkb1	Del 2|0	0	0	0	0	0	0	0	0	0	0	0	0	0	0	0	0	0	0	0	0	0	0	4.96915	3.43536	9.32212	13.2692	ATCGACTCCACCGAGGTAATCTACCAGCCGCGCCGCAAACGCGCCAAGCTCATCGGCAAGTACCTGATGGGGGACCTGCTCGGGGAGGGCTCGTA--|GCAAGGTGAAGGAGGTGCTGGACTCCGAGACCTTATGCCGCAGGGCGGTCAAGATCCTCAAGAAGAAAAAGCTGCGCAGGATCCCCAATGGAGAGGCCAACGTCAAGAAGTA
Lkb1	Del 0|3	0	0	0	0	0	0	0	0	0	0	0	0	0	0	0	0	0	0	0	0	0	0	3.61403	0.147134	4.99297	0.346947	ATCGACTCCACCGAGGTAATCTACCAGCCGCGCCGCAAACGCGCCAAGCTCATCGGCAAGTACCTGATGGGGGACCTGCTCGGGGAGGGCTCGTACG|---AGGTGAAGGAGGTGCTGGACTCCGAGACCTTATGCCGCAGGGCGGTCAAGATCCTCAAGAAGAAAAAGCTGCGCAGGATCCCCAATGGAGAGGCCAACGTCAAGAAGTA
Mlh1	WT	17.9862	62.3622	65.0825	25.1259	75.4047	48.2304	69.7991	65.4789	38.6013	49.6666	100	100	100	59.3107	64.7611	24.3774	94.9848	38.9174	100	77.0605	67.3363	100	68.5029	92.6445	70.891	98.9617	ATGTGCTAAAACCTGGCCTTTTTTACTCTTTTCTCTCTTGAAACAGACCTTGCTTCCAGGACTTGCTGGGCCTTCTGGGGAGGCAGCTAGACCCACGA|CAGGGGTGGCTTCCTCATCCACTAGTGGAAGTGGCGACAAGGTCTACGCTTACCAGATGGTCCGTACGGACTCCCGGGAGCAGAAGCTTGACGCCTTTCTGCAGCCTGTAAG
Mlh1	Del 3|0	46.543	15.5062	0	0	0	0	0	0	0	25.3418	0	0	0	18.9632	17.9818	0	2.35377	0	0	0	16.8077	0	15.2957	3.68371	15.0935	0.607434	ATGTGCTAAAACCTGGCCTTTTTTACTCTTTTCTCTCTTGAAACAGACCTTGCTTCCAGGACTTGCTGGGCCTTCTGGGGAGGCAGCTAGACCCA---|CAGGGGTGGCTTCCTCATCCACTAGTGGAAGTGGCGACAAGGTCTACGCTTACCAGATGGTCCGTACGGACTCCCGGGAGCAGAAGCTTGACGCCTTTCTGCAGCCTGTAAG
Mlh1	Del 5|0	35.4708	0	0	0	10.9437	0	0	0	61.3987	24.9917	0	0	0	0	0	0	2.08917	0	0	7.27676	0	0	0	0	0	0	ATGTGCTAAAACCTGGCCTTTTTTACTCTTTTCTCTCTTGAAACAGACCTTGCTTCCAGGACTTGCTGGGCCTTCTGGGGAGGCAGCTAGACC-----|CAGGGGTGGCTTCCTCATCCACTAGTGGAAGTGGCGACAAGGTCTACGCTTACCAGATGGTCCGTACGGACTCCCGGGAGCAGAAGCTTGACGCCTTTCTGCAGCCTGTAAG
Mlh1	Del 2|0	0	11.4967	0	32.4483	0	0	0	18.0679	0	0	0	0	0	0	0	0	0	0	0	0	0	0	0	0	0	0	ATGTGCTAAAACCTGGCCTTTTTTACTCTTTTCTCTCTTGAAACAGACCTTGCTTCCAGGACTTGCTGGGCCTTCTGGGGAGGCAGCTAGACCCAC--|CAGGGGTGGCTTCCTCATCCACTAGTGGAAGTGGCGACAAGGTCTACGCTTACCAGATGGTCCGTACGGACTCCCGGGAGCAGAAGCTTGACGCCTTTCTGCAGCCTGTAAG
Mlh1	Del 0|1	0	10.6349	0	0	0	0	0	0	0	0	0	0	0	0	0	0	0	0	0	0	0	0	0	0	0	0	ATGTGCTAAAACCTGGCCTTTTTTACTCTTTTCTCTCTTGAAACAGACCTTGCTTCCAGGACTTGCTGGGCCTTCTGGGGAGGCAGCTAGACCCACGA|-AGGGGTGGCTTCCTCATCCACTAGTGGAAGTGGCGACAAGGTCTACGCTTACCAGATGGTCCGTACGGACTCCCGGGAGCAGAAGCTTGACGCCTTTCTGCAGCCTGTAAG
Mlh1	Del 10|2	0	0	34.9175	0	0	0	0	0	0	0	0	0	0	0	0	0	0	0	0	0	0	0	0	0	0	0	ATGTGCTAAAACCTGGCCTTTTTTACTCTTTTCTCTCTTGAAACAGACCTTGCTTCCAGGACTTGCTGGGCCTTCTGGGGAGGCAGCT----------|--GGGGTGGCTTCCTCATCCACTAGTGGAAGTGGCGACAAGGTCTACGCTTACCAGATGGTCCGTACGGACTCCCGGGAGCAGAAGCTTGACGCCTTTCTGCAGCCTGTAAG
Mlh1	Del 30|9	0	0	0	42.4258	0	0	0	0	0	0	0	0	0	0	0	0	0.57229	0	0	0	0	0	0	0	0	0	ATGTGCTAAAACCTGGCCTTTTTTACTCTTTTCTCTCTTGAAACAGACCTTGCTTCCAGGACTTGCTG------------------------------|---------CTTCCTCATCCACTAGTGGAAGTGGCGACAAGGTCTACGCTTACCAGATGGTCCGTACGGACTCCCGGGAGCAGAAGCTTGACGCCTTTCTGCAGCCTGTAAG
Mlh1	Del 14|10	0	0	0	0	13.6516	0	0	0	0	0	0	0	0	0	0	0	0	0	0	0	0	0	0	0	0	0	ATGTGCTAAAACCTGGCCTTTTTTACTCTTTTCTCTCTTGAAACAGACCTTGCTTCCAGGACTTGCTGGGCCTTCTGGGGAGGC--------------|----------TTCCTCATCCACTAGTGGAAGTGGCGACAAGGTCTACGCTTACCAGATGGTCCGTACGGACTCCCGGGAGCAGAAGCTTGACGCCTTTCTGCAGCCTGTAAG
Mlh1	Del 1|0	0	0	0	0	0	25.8972	0	0	0	0	0	0	0	0	0	0	0	0	0	0	0	0	0	0	0	0	ATGTGCTAAAACCTGGCCTTTTTTACTCTTTTCTCTCTTGAAACAGACCTTGCTTCCAGGACTTGCTGGGCCTTCTGGGGAGGCAGCTAGACCCACG-|CAGGGGTGGCTTCCTCATCCACTAGTGGAAGTGGCGACAAGGTCTACGCTTACCAGATGGTCCGTACGGACTCCCGGGAGCAGAAGCTTGACGCCTTTCTGCAGCCTGTAAG
Mlh1	Del 0|2	0	0	0	0	0	25.8723	0	16.4532	0	0	0	0	0	0	0	0	0	0	0	0	0	0	0	0	0	0	ATGTGCTAAAACCTGGCCTTTTTTACTCTTTTCTCTCTTGAAACAGACCTTGCTTCCAGGACTTGCTGGGCCTTCTGGGGAGGCAGCTAGACCCACGA|--GGGGTGGCTTCCTCATCCACTAGTGGAAGTGGCGACAAGGTCTACGCTTACCAGATGGTCCGTACGGACTCCCGGGAGCAGAAGCTTGACGCCTTTCTGCAGCCTGTAAG
Mlh1	Del 0|2	0	0	0	0	0	0	15.4727	0	0	0	0	0	0	0	0	0	0	0	0	0	0	0	0	0	0	0	ATGTGCTAAAACCTGGCCTTTTTTACTCTTTTCTCTCTTGAAACAGACCTTGCTTCCAGGACTTGCTGGGCCTTCTGGGGAGGCAGCTAGACCCACGA|C--GGGTGGCTTCCTCATCCACTAGTGGAAGTGGCGACAAGGTCTACGCTTACCAGATGGTCCGTACGGACTCCCGGGAGCAGAAGCTTGACGCCTTTCTGCAGCCTGTAAG
Mlh1	Del 0|3	0	0	0	0	0	0	14.7282	0	0	0	0	0	0	21.7261	0	0	0	20.9481	0	0	0	0	0	0	0	0	ATGTGCTAAAACCTGGCCTTTTTTACTCTTTTCTCTCTTGAAACAGACCTTGCTTCCAGGACTTGCTGGGCCTTCTGGGGAGGCAGCTAGACCCACGA|---GGGTGGCTTCCTCATCCACTAGTGGAAGTGGCGACAAGGTCTACGCTTACCAGATGGTCCGTACGGACTCCCGGGAGCAGAAGCTTGACGCCTTTCTGCAGCCTGTAAG
Mlh1	Del 4|14	0	0	0	0	0	0	0	0	0	0	0	0	0	0	17.2571	0	0	0	0	0	0	0	0	0	0	0	ATGTGCTAAAACCTGGCCTTTTTTACTCTTTTCTCTCTTGAAACAGACCTTGCTTCCAGGACTTGCTGGGCCTTCTGGGGAGGCAGCTAGACCC---- | --------------TCATCCACTAGTGGAAGTGGCGACAAGGTCTACGCTTACCAGATGGTCCGTACGGACTCCCGGGAGCAGAAGCTTGACGCCTTTCTGCAGCCTGTAAG
Mlh1	Del 6|0	0	0	0	0	0	0	0	0	0	0	0	0	0	0	0	39.1826	0	0	0	0	0	0	0	0	0	0	ATGTGCTAAAACCTGGCCTTTTTTACTCTTTTCTCTCTTGAAACAGACCTTGCTTCCAGGACTTGCTGGGCCTTCTGGGGAGGCAGCTAGAC------|CAGGGGTGGCTTCCTCATCCACTAGTGGAAGTGGCGACAAGGTCTACGCTTACCAGATGGTCCGTACGGACTCCCGGGAGCAGAAGCTTGACGCCTTTCTGCAGCCTGTAAG
Mlh1	Del 4|0	0	0	0	0	0	0	0	0	0	0	0	0	0	0	0	36.44	0	0	0	0	0	0	0	0	0	0	ATGTGCTAAAACCTGGCCTTTTTTACTCTTTTCTCTCTTGAAACAGACCTTGCTTCCAGGACTTGCTGGGCCTTCTGGGGAGGCAGCTAGACCC----|CAGGGGTGGCTTCCTCATCCACTAGTGGAAGTGGCGACAAGGTCTACGCTTACCAGATGGTCCGTACGGACTCCCGGGAGCAGAAGCTTGACGCCTTTCTGCAGCCTGTAAG
Mlh1	Del 16|0	0	0	0	0	0	0	0	0	0	0	0	0	0	0	0	0	0	21.4974	0	0	0	0	0	0	0	0	ATGTGCTAAAACCTGGCCTTTTTTACTCTTTTCTCTCTTGAAACAGACCTTGCTTCCAGGACTTGCTGGGCCTTCTGGGGAGG------------------|CAGGGGTGGCTTCCTCATCCACTAGTGGAAGTGGCGACAAGGTCTACGCTTACCAGATGGTCCGTACGGACTCCCGGGAGCAGAAGCTTGACGCCTTTCTGCAGCCTGTAAG
Mlh1	Del 0|12	0	0	0	0	0	0	0	0	0	0	0	0	0	0	0	0	0	18.6372	0	0	0	0	0	0	0	0	ATGTGCTAAAACCTGGCCTTTTTTACTCTTTTCTCTCTTGAAACAGACCTTGCTTCCAGGACTTGCTGGGCCTTCTGGGGAGGCAGCTAGACCCACGA|------------CCTCATCCACTAGTGGAAGTGGCGACAAGGTCTACGCTTACCAGATGGTCCGTACGGACTCCCGGGAGCAGAAGCTTGACGCCTTTCTGCAGCCTGTAAG
Mlh1	Ins 1 A	0	0	0	0	0	0	0	0	0	0	0	0	0	0	0	0	0	0	0	0	0	0	0	0	0	0	ATGTGCTAAAACCTGGCCTTTTTTACTCTTTTCTCTCTTGAAACAGACCTTGCTTCCAGGACTTGCTGGGCCTTCTGGGGAGGCAGCTAGACCCACGA{A}|CAGGGGTGGCTTCCTCATCCACTAGTGGAAGTGGCGACAAGGTCTACGCTTACCAGATGGTCCGTACGGACTCCCGGGAGCAGAAGCTTGACGCCTTTCTGCAGCCTGTAAG
Mlh1	Del 8|0	0	0	0	0	0	0	0	0	0	0	0	0	0	0	0	0	0	0	0	0	15.856	0	0	0	0	0	ATGTGCTAAAACCTGGCCTTTTTTACTCTTTTCTCTCTTGAAACAGACCTTGCTTCCAGGACTTGCTGGGCCTTCTGGGGAGGCAGCTAG--------|CAGGGGTGGCTTCCTCATCCACTAGTGGAAGTGGCGACAAGGTCTACGCTTACCAGATGGTCCGTACGGACTCCCGGGAGCAGAAGCTTGACGCCTTTCTGCAGCCTGTAAG
Mlh1	Del 7|0	0	0	0	0	0	0	0	0	0	0	0	0	0	0	0	0	0	0	0	6.39916	0	0	0	0	0	0	ATGTGCTAAAACCTGGCCTTTTTTACTCTTTTCTCTCTTGAAACAGACCTTGCTTCCAGGACTTGCTGGGCCTTCTGGGGAGGCAGCTAGA-------|CAGGGGTGGCTTCCTCATCCACTAGTGGAAGTGGCGACAAGGTCTACGCTTACCAGATGGTCCGTACGGACTCCCGGGAGCAGAAGCTTGACGCCTTTCTGCAGCCTGTAAG
Mlh1	Del 20|9	0	0	0	0	0	0	0	0	0	0	0	0	0	0	0	0	0	0	0	9.26355	0	0	0	0	0	0	ATGTGCTAAAACCTGGCCTTTTTTACTCTTTTCTCTCTTGAAACAGACCTTGCTTCCAGGACTTGCTGGGCCTTCTGGG----------------------|---------CTTCCTCATCCACTAGTGGAAGTGGCGACAAGGTCTACGCTTACCAGATGGTCCGTACGGACTCCCGGGAGCAGAAGCTTGACGCCTTTCTGCAGCCTGTAAG
Mlh1	Del 1|9	0	0	0	0	0	0	0	0	0	0	0	0	0	0	0	0	0	0	0	0	0	0	16.2014	3.67184	14.0154	0.430903	ATGTGCTAAAACCTGGCCTTTTTTACTCTTTTCTCTCTTGAAACAGACCTTGCTTCCAGGACTTGCTGGGCCTTCTGGGGAGGCAGCTAGACCCACG-|--------CTTCCTCATCCACTAGTGGAAGTGGCGACAAGGTCTACGCTTACCAGATGGTCCGTACGGACTCCCGGGAGCAGAAGCTTGACGCCTTTCTGCAGCCTGTAAG
Mst1	WT	41.1739	63.2558	76.3013	31.2559	80.2085	69.0033	76.2475	66.5163	58.2541	67.9592	71.3535	52.392	56.8612	60.5874	80.0119	23.2594	100	100	71.4256	59.0791	72.4902	100	74.0374	81.8908	70.678	65.9005	TGGGGTCAATCAAGCCTAAGGAGGGAGTGATAGGCCTGCCCCCACTTAGAAGTGCATTGGCCCTGTTTCCAGCTGTTTGTGTTCTGTGCAACGGTGAGGATTA|CCGTGGCGAGGTAGACGTTACAGAGTCAGGGCGGGAGTGTCAACGCTGGGACCTGCAGCACCCCCACTCGCACCCTTTCCAGCCTGAAAAGTATGTAGGCA
Mst1	Del 1|0	58.8261	13.2458	0	0	0.943523	0	0	33.4837	41.7459	32.0408	13.59	0	24.6635	19.341	0	36.7326	0	0	14.3337	33.7467	27.5098	0	20.1691	14.3154	23.8887	27.5693	TGGGGTCAATCAAGCCTAAGGAGGGAGTGATAGGCCTGCCCCCACTTAGAAGTGCATTGGCCCTGTTTCCAGCTGTTTGTGTTCTGTGCAACGGTGAGGATT-|CCGTGGCGAGGTAGACGTTACAGAGTCAGGGCGGGAGTGTCAACGCTGGGACCTGCAGCACCCCCACTCGCACCCTTTCCAGCCTGAAAAGTATGTAGGCA
Mst1	Ins 1A	0	23.4984	0	0	0	0	0	0	0	0	0	0	0	0	0	0	0	0	0	0	0	0	0	0	0	0	TGGGGTCAATCAAGCCTAAGGAGGGAGTGATAGGCCTGCCCCCACTTAGAAGTGCATTGGCCCTGTTTCCAGCTGTTTGTGTTCTGTGCAACGGTGAGGATTA{A}|CCGTGGCGAGGTAGACGTTACAGAGTCAGGGCGGGAGTGTCAACGCTGGGACCTGCAGCACCCCCACTCGCACCCTTTCCAGCCTGAAAAGTATGTAGGCA
Mst1	Del 4|0	0	0	23.6987	0	0	0	0	0	0	0	0	0	0	0	0	0	0	0	0	0	0	0	0	0	0	0	TGGGGTCAATCAAGCCTAAGGAGGGAGTGATAGGCCTGCCCCCACTTAGAAGTGCATTGGCCCTGTTTCCAGCTGTTTGTGTTCTGTGCAACGGTGAG----A|CCGTGGCGAGGTAGACGTTACAGAGTCAGGGCGGGAGTGTCAACGCTGGGACCTGCAGCACCCCCACTCGCACCCTTTCCAGCCTGAAAAGTATGTAGGCA
Mst1	Del 40|8	0	0	0	34.3888	0	0	0	0	0	0	0	0	0	0	0	0	0	0	0	0	0	0	0	0	0	0	TGGGGTCAATCAAGCCTAAGGAGGGAGTGATAGGCCTGCCCCCACTTAGAAGTGCATTGGCCC---------------------------------------- | --------AGGTAGACGTTACAGAGTCAGGGCGGGAGTGTCAACGCTGGGACCTGCAGCACCCCCACTCGCACCCTTTCCAGCCTGAAAAGTATGTAGGCA
Mst1	Del 31|23	0	0	0	34.3553	0	0	0	0	0	0	0	0	0	0	0	0	0	0	0	0	0	0	0	0	0	0	TGGGGTCAATCAAGCCTAAGGAGGGAGTGATAGGCCTGCCCCCACTTAGAAGTGCATTGGCCCTGTTTCCAG------------------------------- | -----------------------AGTCAGGGCGGGAGTGTCAACGCTGGGACCTGCAGCACCCCCACTCGCACCCTTTCCAGCCTGAAAAGTATGTAGGCA
Mst1	Del 11|27	0	0	0	0	8.42881	0	0	0	0	0	0	0	0	0	0	0	0	0	0	0	0	0	0	0	0	0	TGGGGTCAATCAAGCCTAAGGAGGGAGTGATAGGCCTGCCCCCACTTAGAAGTGCATTGGCCCTGTTTCCAGCTGTTTGTGTTCTGTGCAAC----------- | ---------------------------AGGGCGGGAGTGTCAACGCTGGGACCTGCAGCACCCCCACTCGCACCCTTTCCAGCCTGAAAAGTATGTAGGCA
Mst1	Del 2|0	0	0	0	0	8.19517	0	11.6912	0	0	0	0	0	0	0	0	0	0	0	0	0	0	0	0	0	0	0	TGGGGTCAATCAAGCCTAAGGAGGGAGTGATAGGCCTGCCCCCACTTAGAAGTGCATTGGCCCTGTTTCCAGCTGTTTGTGTTCTGTGCAACGGTGAGGAT--|CCGTGGCGAGGTAGACGTTACAGAGTCAGGGCGGGAGTGTCAACGCTGGGACCTGCAGCACCCCCACTCGCACCCTTTCCAGCCTGAAAAGTATGTAGGCA
Mst1	Del 4|11	0	0	0	0	2.22402	0	0	0	0	0	0	0	0	0	0	0	0	0	0	7.17426	0	0	0	0	0	0	TGGGGTCAATCAAGCCTAAGGAGGGAGTGATAGGCCTGCCCCCACTTAGAAGTGCATTGGCCCTGTTTCCAGCTGTTTGTGTTCTGTGCAACGGTGAGG---- | -----------TAGACGTTACAGAGTCAGGGCGGGAGTGTCAACGCTGGGACCTGCAGCACCCCCACTCGCACCCTTTCCAGCCTGAAAAGTATGTAGGCA
Mst1	Del 7|0	0	0	0	0	0	30.9967	0	0	0	0	0	0	0	0	0	0	0	0	0	0	0	0	0	0	0	0	TGGGGTCAATCAAGCCTAAGGAGGGAGTGATAGGCCTGCCCCCACTTAGAAGTGCATTGGCCCTGTTTCCAGCTGTTTGTGTTCTGTGCAACGGT-------A|CCGTGGCGAGGTAGACGTTACAGAGTCAGGGCGGGAGTGTCAACGCTGGGACCTGCAGCACCCCCACTCGCACCCTTTCCAGCCTGAAAAGTATGTAGGCA
Mst1	Del 7|5	0	0	0	0	0	0	12.0613	0	0	0	0	0	0	0	19.9881	0	0	0	0	0	0	0	0	0	0	0	TGGGGTCAATCAAGCCTAAGGAGGGAGTGATAGGCCTGCCCCCACTTAGAAGTGCATTGGCCCTGTTTCCAGCTGTTTGTGTTCTGTGCAACGGTG-------|-----GCGAGGTAGACGTTACAGAGTCAGGGCGGGAGTGTCAACGCTGGGACCTGCAGCACCCCCACTCGCACCCTTTCCAGCCTGAAAAGTATGTAGGCA
Mst1	Del 9|0	0	0	0	0	0	0	0	0	0	0	15.0565	0	0	0	0	0	0	0	0	0	0	0	0	0	0	0	TGGGGTCAATCAAGCCTAAGGAGGGAGTGATAGGCCTGCCCCCACTTAGAAGTGCATTGGCCCTGTTTCCAGCTGTTTGTGTTCTGTGCAACG---------A|CCGTGGCGAGGTAGACGTTACAGAGTCAGGGCGGGAGTGTCAACGCTGGGACCTGCAGCACCCCCACTCGCACCCTTTCCAGCCTGAAAAGTATGTAGGCA
Mst1	Del 3|5	0	0	0	0	0	0	0	0	0	0	0	47.608	0	0	0	0	0	0	0	0	0	0	0	0	0	0	TGGGGTCAATCAAGCCTAAGGAGGGAGTGATAGGCCTGCCCCCACTTAGAAGTGCATTGGCCCTGTTTCCAGCTGTTTGTGTTCTGTGCAACGGTGAGGA--- | -----GCGAGGTAGACGTTACAGAGTCAGGGCGGGAGTGTCAACGCTGGGACCTGCAGCACCCCCACTCGCACCCTTTCCAGCCTGAAAAGTATGTAGGCA
Mst1	Del 1|0	0	0	0	0	0	0	0	0	0	0	0	0	18.4754	0	0	0	0	0	0	0	0	0	0	0	0	0	TGGGGTCAATCAAGCCTAAGGAGGGAGTGATAGGCCTGCCCCCACTTAGAAGTGCATTGGCCCTGTTTCCAGCTGTTTGTGTTCTGTGCAACGGTGAGGAT-A|CCGTGGCGAGGTAGACGTTACAGAGTCAGGGCGGGAGTGTCAACGCTGGGACCTGCAGCACCCCCACTCGCACCCTTTCCAGCCTGAAAAGTATGTAGGCA
Mst1	Del 9|0	0	0	0	0	0	0	0	0	0	0	0	0	0	20.0715	0	0	0	0	0	0	0	0	0	0	0	0	TGGGGTCAATCAAGCCTAAGGAGGGAGTGATAGGCCTGCCCCCACTTAGAAGTGCATTGGCCCTGTTTCCAGCTGTTTGTGTTCTGTGCAACGG---------|CCGTGGCGAGGTAGACGTTACAGAGTCAGGGCGGGAGTGTCAACGCTGGGACCTGCAGCACCCCCACTCGCACCCTTTCCAGCCTGAAAAGTATGTAGGCA
Mst1	Del 42|0	0	0	0	0	0	0	0	0	0	0	0	0	0	0	0	40.008	0	0	0	0	0	0	0	0	0	0	TGGGGTCAATCAAGCCTAAGGAGGGAGTGATAGGCCTGCCCCCACTTAGAAGTGCATTGGC------------------------------------------|CCGTGGCGAGGTAGACGTTACAGAGTCAGGGCGGGAGTGTCAACGCTGGGACCTGCAGCACCCCCACTCGCACCCTTTCCAGCCTGAAAAGTATGTAGGCA
Mst1	Del 14|2	0	0	0	0	0	0	0	0	0	0	0	0	0	0	0	0	0	0	14.2407	0	0	0	0	0	0	0	TGGGGTCAATCAAGCCTAAGGAGGGAGTGATAGGCCTGCCCCCACTTAGAAGTGCATTGGCCCTGTTTCCAGCTGTTTGTGTTCTGTGC-------------- | --GTGGCGAGGTAGACGTTACAGAGTCAGGGCGGGAGTGTCAACGCTGGGACCTGCAGCACCCCCACTCGCACCCTTTCCAGCCTGAAAAGTATGTAGGCA
Mst1	Del 7|3	0	0	0	0	0	0	0	0	0	0	0	0	0	0	0	0	0	0	0	0	0	0	5.79352	3.7938	5.43325	6.5302	TGGGGTCAATCAAGCCTAAGGAGGGAGTGATAGGCCTGCCCCCACTTAGAAGTGCATTGGCCCTGTTTCCAGCTGTTTGTGTTCTGTGCAACGGTG------- | ---TGGCGAGGTAGACGTTACAGAGTCAGGGCGGGAGTGTCAACGCTGGGACCTGCAGCACCCCCACTCGCACCCTTTCCAGCCTGAAAAGTATGTAGGCA
Msx1	WT	21.1355	70.6423	47.4389	43.989	89.4821	45.9813	64.5956	65.0609	57.1869	89.8525	65.3903	32.9525	100	58.0893	61.2492	21.5822	28.6991	38.2378	80.707	100	67.1911	100	87.2734	90.173	79.9791	82.231	TCATGGCCGATCACAGGAAGCCCGGGGCCAAGGAGAGCGTCCTGGTGGCCTCCGAAGGGGCTCAGGCAGCGGGTGGCTCGGTGCAGCACTTGGGCACCCGGCCCGGGT|CTCTGGGCGCCCCGGATGCGCCCTCCTCGCCGCGGCCTCTCGGCCATTTCTCAGTCGGAGGACTCCTCAAGCTGCCAGAAGATGCTCTGGTGAAGGCCGAAAGCCCCGAGAAACTAGA
Msx1	Del 0|2	41.0588	29.3577	0	0	0	0	6.34026	17.5181	0	6.26627	0	34.228	0	21.1778	0	39.9795	0	20.5133	0	0	0	0	3.76266	3.06332	10.3069	5.70226	TCATGGCCGATCACAGGAAGCCCGGGGCCAAGGAGAGCGTCCTGGTGGCCTCCGAAGGGGCTCAGGCAGCGGGTGGCTCGGTGCAGCACTTGGGCACCCGGCCCGGGT|--CTGGGCGCCCCGGATGCGCCCTCCTCGCCGCGGCCTCTCGGCCATTTCTCAGTCGGAGGACTCCTCAAGCTGCCAGAAGATGCTCTGGTGAAGGCCGAAAGCCCCGAGAAACTAGA
Msx1	Del 0|4	25.8269	0	0	0	0	0	0	0	0	3.88125	0	32.8195	0	0	0	0	0	0	0	0	0	0	0	0	0	0	TCATGGCCGATCACAGGAAGCCCGGGGCCAAGGAGAGCGTCCTGGTGGCCTCCGAAGGGGCTCAGGCAGCGGGTGGCTCGGTGCAGCACTTGGGCACCCGGCCCGGGT|----GGGCGCCCCGGATGCGCCCTCCTCGCCGCGGCCTCTCGGCCATTTCTCAGTCGGAGGACTCCTCAAGCTGCCAGAAGATGCTCTGGTGAAGGCCGAAAGCCCCGAGAAACTAGA
Msx1	Del 28|7	6.08616	0	0	0	0	0	0	0	0	0	0	0	0	0	0	0	0	0	0	0	0	0	0	0	0	0	TCATGGCCGATCACAGGAAGCCCGGGGCCAAGGAGAGCGTCCTGGTGGCCTCCGAAGGGGCTCAGGCAGCGGGTGGCTCG---------------------------- | -------CGCCCCGGATGCGCCCTCCTCGCCGCGGCCTCTCGGCCATTTCTCAGTCGGAGGACTCCTCAAGCTGCCAGAAGATGCTCTGGTGAAGGCCGAAAGCCCCGAGAAACTAGA
Msx1	Del 1|6	5.89266	0	0	0	0	0	0	0	0	0	0	0	0	0	20.2437	0	34.2048	0	0	0	0	0	0	0	0	0	TCATGGCCGATCACAGGAAGCCCGGGGCCAAGGAGAGCGTCCTGGTGGCCTCCGAAGGGGCTCAGGCAGCGGGTGGCTCGGTGCAGCACTTGGGCACCCGGCCCGGG- | ------GCGCCCCGGATGCGCCCTCCTCGCCGCGGCCTCTCGGCCATTTCTCAGTCGGAGGACTCCTCAAGCTGCCAGAAGATGCTCTGGTGAAGGCCGAAAGCCCCGAGAAACTAGA
Msx1	Del 0|9	0	0	26.812	0	0	0	0	0	0	0	0	0	0	0	0	0	0	0	0	0	0	0	0	0	0	0	TCATGGCCGATCACAGGAAGCCCGGGGCCAAGGAGAGCGTCCTGGTGGCCTCCGAAGGGGCTCAGGCAGCGGGTGGCTCGGTGCAGCACTTGGGCACCCGGCCCGGGT|---------CCCCGGATGCGCCCTCCTCGCCGCGGCCTCTCGGCCATTTCTCAGTCGGAGGACTCCTCAAGCTGCCAGAAGATGCTCTGGTGAAGGCCGAAAGCCCCGAGAAACTAGA
Msx1	Del 1|7	0	0	25.7491	0	0	0	0	0	0	0	0	0	0	0	0	0	0	0	0	0	0	0	0	0	0	0	TCATGGCCGATCACAGGAAGCCCGGGGCCAAGGAGAGCGTCCTGGTGGCCTCCGAAGGGGCTCAGGCAGCGGGTGGCTCGGTGCAGCACTTGGGCACCCGGCCCGGG- | -------CGCCCCGGATGCGCCCTCCTCGCCGCGGCCTCTCGGCCATTTCTCAGTCGGAGGACTCCTCAAGCTGCCAGAAGATGCTCTGGTGAAGGCCGAAAGCCCCGAGAAACTAGA
Msx1	Del 4|23	0	0	0	56.011	0	0	0	0	0	0	0	0	0	0	0	0	0	0	0	0	0	0	0	0	0	0	TCATGGCCGATCACAGGAAGCCCGGGGCCAAGGAGAGCGTCCTGGTGGCCTCCGAAGGGGCTCAGGCAGCGGGTGGCTCGGTGCAGCACTTGGGCACCCGGCCC---- | -----------------------TCCTCGCCGCGGCCTCTCGGCCATTTCTCAGTCGGAGGACTCCTCAAGCTGCCAGAAGATGCTCTGGTGAAGGCCGAAAGCCCCGAGAAACTAGA
Msx1	Del 5|3	0	0	0	0	10.5179	0	0	0	0	0	0	0	0	0	0	0	0	0	0	0	0	0	0	0	0	0	TCATGGCCGATCACAGGAAGCCCGGGGCCAAGGAGAGCGTCCTGGTGGCCTCCGAAGGGGCTCAGGCAGCGGGTGGCTCGGTGCAGCACTTGGGCACCCGGCC----- | ---TGGGCGCCCCGGATGCGCCCTCCTCGCCGCGGCCTCTCGGCCATTTCTCAGTCGGAGGACTCCTCAAGCTGCCAGAAGATGCTCTGGTGAAGGCCGAAAGCCCCGAGAAACTAGA
Msx1	Del 0|18	0	0	0	0	0	27.3802	0	0	0	0	0	0	0	0	0	0	0	0	0	0	0	0	0	0	0	0	TCATGGCCGATCACAGGAAGCCCGGGGCCAAGGAGAGCGTCCTGGTGGCCTCCGAAGGGGCTCAGGCAGCGGGTGGCTCGGTGCAGCACTTGGGCACCCGGCCCGGGT|------------------CGCCCTCCTCGCCGCGGCCTCTCGGCCATTTCTCAGTCGGAGGACTCCTCAAGCTGCCAGAAGATGCTCTGGTGAAGGCCGAAAGCCCCGAGAAACTAGA
Msx1	Del 0|8	0	0	0	0	0	26.6384	0	0	0	0	0	0	0	0	0	0	0	0	0	0	0	0	0	0	0	0	TCATGGCCGATCACAGGAAGCCCGGGGCCAAGGAGAGCGTCCTGGTGGCCTCCGAAGGGGCTCAGGCAGCGGGTGGCTCGGTGCAGCACTTGGGCACCCGGCCCGGGT|--------GCCCCGGATGCGCCCTCCTCGCCGCGGCCTCTCGGCCATTTCTCAGTCGGAGGACTCCTCAAGCTGCCAGAAGATGCTCTGGTGAAGGCCGAAAGCCCCGAGAAACTAGA
Msx1	Del 9|10	0	0	0	0	0	0	14.9606	0	0	0	0	0	0	0	0	0	0	0	0	0	0	0	0	0	0	0	TCATGGCCGATCACAGGAAGCCCGGGGCCAAGGAGAGCGTCCTGGTGGCCTCCGAAGGGGCTCAGGCAGCGGGTGGCTCGGTGCAGCACTTGGGCACCC--------- | ----------CCCGGATGCGCCCTCCTCGCCGCGGCCTCTCGGCCATTTCTCAGTCGGAGGACTCCTCAAGCTGCCAGAAGATGCTCTGGTGAAGGCCGAAAGCCCCGAGAAACTAGA
Msx1	Del 7|6	0	0	0	0	0	0	14.1036	0	0	0	0	0	0	0	0	0	0	0	0	0	0	0	0	0	0	0	TCATGGCCGATCACAGGAAGCCCGGGGCCAAGGAGAGCGTCCTGGTGGCCTCCGAAGGGGCTCAGGCAGCGGGTGGCTCGGTGCAGCACTTGGGCACCCGG------- | ------GCGCCCCGGATGCGCCCTCCTCGCCGCGGCCTCTCGGCCATTTCTCAGTCGGAGGACTCCTCAAGCTGCCAGAAGATGCTCTGGTGAAGGCCGAAAGCCCCGAGAAACTAGA
Msx1	Del 2|0	0	0	0	0	0	0	0	17.421	0	0	0	0	0	0	0	0	0	0	0	0	0	0	0	0	0	0	TCATGGCCGATCACAGGAAGCCCGGGGCCAAGGAGAGCGTCCTGGTGGCCTCCGAAGGGGCTCAGGCAGCGGGTGGCTCGGTGCAGCACTTGGGCACCCGGCCCGG--|CTCTGGGCGCCCCGGATGCGCCCTCCTCGCCGCGGCCTCTCGGCCATTTCTCAGTCGGAGGACTCCTCAAGCTGCCAGAAGATGCTCTGGTGAAGGCCGAAAGCCCCGAGAAACTAGA
Msx1	Del 0|1	0	0	0	0	0	0	0	0	42.8131	0	0	0	0	0	18.5071	0	0	0	0	0	0	0	0	0	0	0	TCATGGCCGATCACAGGAAGCCCGGGGCCAAGGAGAGCGTCCTGGTGGCCTCCGAAGGGGCTCAGGCAGCGGGTGGCTCGGTGCAGCACTTGGGCACCCGGCCCGGGT|-TCTGGGCGCCCCGGATGCGCCCTCCTCGCCGCGGCCTCTCGGCCATTTCTCAGTCGGAGGACTCCTCAAGCTGCCAGAAGATGCTCTGGTGAAGGCCGAAAGCCCCGAGAAACTAGA
Msx1	Del 10|3	0	0	0	0	0	0	0	0	0	0	17.42	0	0	0	0	0	0	0	0	0	0	0	0	0	0	0	TCATGGCCGATCACAGGAAGCCCGGGGCCAAGGAGAGCGTCCTGGTGGCCTCCGAAGGGGCTCAGGCAGCGGGTGGCTCGGTGCAGCACTTGGGCACC---------- | ---TGGGCGCCCCGGATGCGCCCTCCTCGCCGCGGCCTCTCGGCCATTTCTCAGTCGGAGGACTCCTCAAGCTGCCAGAAGATGCTCTGGTGAAGGCCGAAAGCCCCGAGAAACTAGA
Msx1	Del 1|12	0	0	0	0	0	0	0	0	0	0	17.1896	0	0	0	0	0	0	0	0	0	0	0	0	0	0	0	TCATGGCCGATCACAGGAAGCCCGGGGCCAAGGAGAGCGTCCTGGTGGCCTCCGAAGGGGCTCAGGCAGCGGGTGGCTCGGTGCAGCACTTGGGCACCCGGCCCGGG- | ------------CGGATGCGCCCTCCTCGCCGCGGCCTCTCGGCCATTTCTCAGTCGGAGGACTCCTCAAGCTGCCAGAAGATGCTCTGGTGAAGGCCGAAAGCCCCGAGAAACTAGA
Msx1	Del 1|5	0	0	0	0	0	0	0	0	0	0	0	0	0	20.7329	0	0	0	0	0	0	15.9168	0	0	0	0	0	TCATGGCCGATCACAGGAAGCCCGGGGCCAAGGAGAGCGTCCTGGTGGCCTCCGAAGGGGCTCAGGCAGCGGGTGGCTCGGTGCAGCACTTGGGCACCCGGCCCGGG- | -----GGCGCCCCGGATGCGCCCTCCTCGCCGCGGCCTCTCGGCCATTTCTCAGTCGGAGGACTCCTCAAGCTGCCAGAAGATGCTCTGGTGAAGGCCGAAAGCCCCGAGAAACTAGA
Msx1	Del 2|7	0	0	0	0	0	0	0	0	0	0	0	0	0	0	0	38.4383	0	0	0	0	0	0	0	0	0	0	TCATGGCCGATCACAGGAAGCCCGGGGCCAAGGAGAGCGTCCTGGTGGCCTCCGAAGGGGCTCAGGCAGCGGGTGGCTCGGTGCAGCACTTGGGCACCCGGCCCGG-- | -------CGCCCCGGATGCGCCCTCCTCGCCGCGGCCTCTCGGCCATTTCTCAGTCGGAGGACTCCTCAAGCTGCCAGAAGATGCTCTGGTGAAGGCCGAAAGCCCCGAGAAACTAGA
Msx1	Del 0|12	0	0	0	0	0	0	0	0	0	0	0	0	0	0	0	0	37.0961	0	0	0	0	0	0	0	0	0	TCATGGCCGATCACAGGAAGCCCGGGGCCAAGGAGAGCGTCCTGGTGGCCTCCGAAGGGGCTCAGGCAGCGGGTGGCTCGGTGCAGCACTTGGGCACCCGGCCCGGGT|------------CGGATGCGCCCTCCTCGCCGCGGCCTCTCGGCCATTTCTCAGTCGGAGGACTCCTCAAGCTGCCAGAAGATGCTCTGGTGAAGGCCGAAAGCCCCGAGAAACTAGA
Msx1	Del 33|18	0	0	0	0	0	0	0	0	0	0	0	0	0	0	0	0	0	22.6257	0	0	0	0	0	0	0	0	TCATGGCCGATCACAGGAAGCCCGGGGCCAAGGAGAGCGTCCTGGTGGCCTCCGAAGGGGCTCAGGCAGCGGGTG--------------------------------- | ------------------CGCCCTCCTCGCCGCGGCCTCTCGGCCATTTCTCAGTCGGAGGACTCCTCAAGCTGCCAGAAGATGCTCTGGTGAAGGCCGAAAGCCCCGAGAAACTAGA
Msx1	Del 1|0	0	0	0	0	0	0	0	0	0	0	0	0	0	0	0	0	0	18.6232	0	0	0	0	0	0	0	0	TCATGGCCGATCACAGGAAGCCCGGGGCCAAGGAGAGCGTCCTGGTGGCCTCCGAAGGGGCTCAGGCAGCGGGTGGCTCGGTGCAGCACTTGGGCACCCGGCCCGGG-|CTCTGGGCGCCCCGGATGCGCCCTCCTCGCCGCGGCCTCTCGGCCATTTCTCAGTCGGAGGACTCCTCAAGCTGCCAGAAGATGCTCTGGTGAAGGCCGAAAGCCCCGAGAAACTAGA
Msx1	Del 10|19	0	0	0	0	0	0	0	0	0	0	0	0	0	0	0	0	0	0	19.293	0	0	0	0	0	0	0	TCATGGCCGATCACAGGAAGCCCGGGGCCAAGGAGAGCGTCCTGGTGGCCTCCGAAGGGGCTCAGGCAGCGGGTGGCTCGGTGCAGCACTTGGGCACC----------------------------GCCCTCCTCGCCGCGGCCTCTCGGCCATTTCTCAGTCGGAGGACTCCTCAAGCTGCCAGAAGATGCTCTGGTGAAGGCCGAAAGCCCCGAGAAACTAGA
Msx1	Del 3|1	0	0	0	0	0	0	0	0	0	0	0	0	0	0	0	0	0	0	0	0	16.8922	0	0	0	0	0	TCATGGCCGATCACAGGAAGCCCGGGGCCAAGGAGAGCGTCCTGGTGGCCTCCGAAGGGGCTCAGGCAGCGGGTGGCTCGGTGCAGCACTTGGGCACCCGGCCCG---|-TCTGGGCGCCCCGGATGCGCCCTCCTCGCCGCGGCCTCTCGGCCATTTCTCAGTCGGAGGACTCCTCAAGCTGCCAGAAGATGCTCTGGTGAAGGCCGAAAGCCCCGAGAAACTAGA
Msx1	Ins 1 C	0	0	0	0	0	0	0	0	0	0	0	0	0	0	0	0	0	0	0	0	0	0	8.96398	6.76373	9.71403	12.0668	TCATGGCCGATCACAGGAAGCCCGGGGCCAAGGAGAGCGTCCTGGTGGCCTCCGAAGGGGCTCAGGCAGCGGGTGGCTCGGTGCAGCACTTGGGCACCCGGCCCGGGT|{C}CTCTGGGCGCCCCGGATGCGCCCTCCTCGCCGCGGCCTCTCGGCCATTTCTCAGTCGGAGGACTCCTCAAGCTGCCAGAAGATGCTCTGGTGAAGGCCGAAAGCCCCGAGAAACTAGA
Nf1	WT	91.2394	57.1613	0	43.698	76.6772	48.7477	71.4826	65.4154	58.4336	48.3811	71.8719	67.105	56.1436	79.4156	64.8583	23.177	100	80.4909	84.1047	75.9992	79.4964	100	73.2587	77.6978	69.9364	62.5625	GACTGTGTGGAGGGATTATGTTTTAAATGTAGGATGTGTGGCTGTGGCTATTGGCCTGACTGTGTGTTTCTTTAGGTGTATGGTGCTACTTACCTACAAAAGCTCTTGGACCCTTT|ATTACGAGTCATCATCACATCTTCGGATTGGCAACATGTTAGCTTTGAAGTGGATCCTACCAGGTTTGTCATCTTGTCACAGTTGCTCCCTCACTC
Nf1	Del 4|5	8.7606	0	0	0	0	0	0	0	0	0	0	0	0	0	0	0	0	0	0	0	0	0	0	0	0	0	GACTGTGTGGAGGGATTATGTTTTAAATGTAGGATGTGTGGCTGTGGCTATTGGCCTGACTGTGTGTTTCTTTAGGTGTATGGTGCTACTTACCTACAAAAGCTCTTGGACC----|-----GAGTCATCATCACATCTTCGGATTGGCAACATGTTAGCTTTGAAGTGGATCCTACCAGGTTTGTCATCTTGTCACAGTTGCTCCCTCACTC
Nf1	Ins 1 A	0	27.9692	0	56.302	0	0	0	17.2782	4.26409	25.5462	20.3141	0	0	0	0	0	0	19.5091	0	15.1267	0	0	26.7413	22.3022	30.0636	37.4375	GACTGTGTGGAGGGATTATGTTTTAAATGTAGGATGTGTGGCTGTGGCTATTGGCCTGACTGTGTGTTTCTTTAGGTGTATGGTGCTACTTACCTACAAAAGCTCTTGGACCCTTT|{A}ATTACGAGTCATCATCACATCTTCGGATTGGCAACATGTTAGCTTTGAAGTGGATCCTACCAGGTTTGTCATCTTGTCACAGTTGCTCCCTCACTC
Nf1	Ins 1 T	0	7.53838	0	0	0	0	0	0	0	0	0	0	0	0	0	0	0	0	0	0	0	0	0	0	0	0	GACTGTGTGGAGGGATTATGTTTTAAATGTAGGATGTGTGGCTGTGGCTATTGGCCTGACTGTGTGTTTCTTTAGGTGTATGGTGCTACTTACCTACAAAAGCTCTTGGACCCTTT|{T}ATTACGAGTCATCATCACATCTTCGGATTGGCAACATGTTAGCTTTGAAGTGGATCCTACCAGGTTTGTCATCTTGTCACAGTTGCTCCCTCACTC
Nf1	Del 0|3	0	7.33107	0	0	0	0	14.5077	0	0	0	0	32.895	0	0	0	0	0	0	0	0	0	0	0	0	0	0	GACTGTGTGGAGGGATTATGTTTTAAATGTAGGATGTGTGGCTGTGGCTATTGGCCTGACTGTGTGTTTCTTTAGGTGTATGGTGCTACTTACCTACAAAAGCTCTTGGACCCTTT|---ACGAGTCATCATCACATCTTCGGATTGGCAACATGTTAGCTTTGAAGTGGATCCTACCAGGTTTGTCATCTTGTCACAGTTGCTCCCTCACTC
Nf1	Del 1|0	0	0	0	0	23.3228	0	0	0	18.9028	0	0	0	0	0	0	0	0	0	0	0	20.5036	0	0	0	0	0	GACTGTGTGGAGGGATTATGTTTTAAATGTAGGATGTGTGGCTGTGGCTATTGGCCTGACTGTGTGTTTCTTTAGGTGTATGGTGCTACTTACCTACAAAAGCTCTTGGACCCTT-|ATTACGAGTCATCATCACATCTTCGGATTGGCAACATGTTAGCTTTGAAGTGGATCCTACCAGGTTTGTCATCTTGTCACAGTTGCTCCCTCACTC
Nf1	Del 0|2	0	0	0	0	0	25.8548	0	0	0	26.0727	0	0	43.8564	0	0	0	0	0	0	0	0	0	0	0	0	0	GACTGTGTGGAGGGATTATGTTTTAAATGTAGGATGTGTGGCTGTGGCTATTGGCCTGACTGTGTGTTTCTTTAGGTGTATGGTGCTACTTACCTACAAAAGCTCTTGGACCCTTT|--TACGAGTCATCATCACATCTTCGGATTGGCAACATGTTAGCTTTGAAGTGGATCCTACCAGGTTTGTCATCTTGTCACAGTTGCTCCCTCACTC
Nf1	Del 0|2	0	0	0	0	0	25.3976	0	0	0	0	0	0	0	0	0	0	0	0	0	0	0	0	0	0	0	0	GACTGTGTGGAGGGATTATGTTTTAAATGTAGGATGTGTGGCTGTGGCTATTGGCCTGACTGTGTGTTTCTTTAGGTGTATGGTGCTACTTACCTACAAAAGCTCTTGGACCCTTT|A--ACGAGTCATCATCACATCTTCGGATTGGCAACATGTTAGCTTTGAAGTGGATCCTACCAGGTTTGTCATCTTGTCACAGTTGCTCCCTCACTC
Nf1	Del 2|0 Ins 1C	0	0	0	0	0	0	14.0096	0	0	0	0	0	0	0	0	0	0	0	0	0	0	0	0	0	0	0	GACTGTGTGGAGGGATTATGTTTTAAATGTAGGATGTGTGGCTGTGGCTATTGGCCTGACTGTGTGTTTCTTTAGGTGTATGGTGCTACTTACCTACAAAAGCTCTTGGACCCT--{C}|ATTACGAGTCATCATCACATCTTCGGATTGGCAACATGTTAGCTTTGAAGTGGATCCTACCAGGTTTGTCATCTTGTCACAGTTGCTCCCTCACTC
Nf1	Del 3|5	0	0	0	0	0	0	0	17.3064	0	0	0	0	0	0	0	0	0	0	0	0	0	0	0	0	0	0	GACTGTGTGGAGGGATTATGTTTTAAATGTAGGATGTGTGGCTGTGGCTATTGGCCTGACTGTGTGTTTCTTTAGGTGTATGGTGCTACTTACCTACAAAAGCTCTTGGACCC---|-----GAGTCATCATCACATCTTCGGATTGGCAACATGTTAGCTTTGAAGTGGATCCTACCAGGTTTGTCATCTTGTCACAGTTGCTCCCTCACTC
Nf1	Del 17|2	0	0	0	0	0	0	0	0	18.3995	0	0	0	0	0	0	0	0	0	0	0	0	0	0	0	0	0	GACTGTGTGGAGGGATTATGTTTTAAATGTAGGATGTGTGGCTGTGGCTATTGGCCTGACTGTGTGTTTCTTTAGGTGTATGGTGCTACTTACCTACAA-----------------|--TACGAGTCATCATCACATCTTCGGATTGGCAACATGTTAGCTTTGAAGTGGATCCTACCAGGTTTGTCATCTTGTCACAGTTGCTCCCTCACTC
Nf1	Del 0|1	0	0	0	0	0	0	0	0	0	0	7.81406	0	0	0	0	0	0	0	0	0	0	0	0	0	0	0	GACTGTGTGGAGGGATTATGTTTTAAATGTAGGATGTGTGGCTGTGGCTATTGGCCTGACTGTGTGTTTCTTTAGGTGTATGGTGCTACTTACCTACAAAAGCTCTTGGACCCTTT|-TTACGAGTCATCATCACATCTTCGGATTGGCAACATGTTAGCTTTGAAGTGGATCCTACCAGGTTTGTCATCTTGTCACAGTTGCTCCCTCACTC
Nf1	Del 10|0	0	0	0	0	0	0	0	0	0	0	0	0	0	20.5844	0	0	0	0	0	0	0	0	0	0	0	0	GACTGTGTGGAGGGATTATGTTTTAAATGTAGGATGTGTGGCTGTGGCTATTGGCCTGACTGTGTGTTTCTTTAGGTGTATGGTGCTACTTACCTACAAAAGCTCT----------|ATTACGAGTCATCATCACATCTTCGGATTGGCAACATGTTAGCTTTGAAGTGGATCCTACCAGGTTTGTCATCTTGTCACAGTTGCTCCCTCACTC
Nf1	Del 1|5	0	0	0	0	0	0	0	0	0	0	0	0	0	0	17.6608	0	0	0	0	0	0	0	0	0	0	0	GACTGTGTGGAGGGATTATGTTTTAAATGTAGGATGTGTGGCTGTGGCTATTGGCCTGACTGTGTGTTTCTTTAGGTGTATGGTGCTACTTACCTACAAAAGCTCTTGGACCCTT-|-----GAGTCATCATCACATCTTCGGATTGGCAACATGTTAGCTTTGAAGTGGATCCTACCAGGTTTGTCATCTTGTCACAGTTGCTCCCTCACTC
Nf1	Del 3|0	0	0	0	0	0	0	0	0	0	0	0	0	0	0	17.4809	0	0	0	15.8953	0	0	0	0	0	0	0	GACTGTGTGGAGGGATTATGTTTTAAATGTAGGATGTGTGGCTGTGGCTATTGGCCTGACTGTGTGTTTCTTTAGGTGTATGGTGCTACTTACCTACAAAAGCTCTTGGACCC---|ATTACGAGTCATCATCACATCTTCGGATTGGCAACATGTTAGCTTTGAAGTGGATCCTACCAGGTTTGTCATCTTGTCACAGTTGCTCCCTCACTC
Nf1	Del 0|22 (D23 I1 A)	0	0	0	0	0	0	0	0	0	0	0	0	0	0	0	38.6086	0	0	0	0	0	0	0	0	0	0	GACTGTGTGGAGGGATTATGTTTTAAATGTAGGATGTGTGGCTGTGGCTATTGGCCTGACTGTGTGTTTCTTTAGGTGTATGGTGCTACTTACCTACAAAAGCTCTTGGACCCTTT|A----------------------CGGATTGGCAACATGTTAGCTTTGAAGTGGATCCTACCAGGTTTGTCATCTTGTCACAGTTGCTCCCTCACTC
Nf1	Del 2|20	0	0	0	0	0	0	0	0	0	0	0	0	0	0	0	38.2144	0	0	0	0	0	0	0	0	0	0	GACTGTGTGGAGGGATTATGTTTTAAATGTAGGATGTGTGGCTGTGGCTATTGGCCTGACTGTGTGTTTCTTTAGGTGTATGGTGCTACTTACCTACAAAAGCTCTTGGACCCT--|--------------------CATCTTCGGATTGGCAACATGTTAGCTTTGAAGTGGATCCTACCAGGTTTGTCATCTTGTCACAGTTGCTCCCTCACTC
Nf1	Del 0|1 (D2 I1A)	0	0	0	0	0	0	0	0	0	0	0	0	0	0	0	0	0	0	0	8.8741	0	0	0	0	0	0	GACTGTGTGGAGGGATTATGTTTTAAATGTAGGATGTGTGGCTGTGGCTATTGGCCTGACTGTGTGTTTCTTTAGGTGTATGGTGCTACTTACCTACAAAAGCTCTTGGACCCTTT|A-TACGAGTCATCATCACATCTTCGGATTGGCAACATGTTAGCTTTGAAGTGGATCCTACCAGGTTTGTCATCTTGTCACAGTTGCTCCCTCACTC
Notch3	WT	36.8594	62.9913	48.7977	26.1203	76.8489	100	71.7826	70.3898	36.9574	73.3902	67.1573	33.1863	22.5165	59.6877	62.9871	36.4489	23.1079	100	71.6005	81.0774	68.9417	100	96.8718	95.7649	94.6536	96.8856	CATACGCTGTGAGAGCCAGGTGGATGAGTGCCGCAGCCAGCCCTGTCGATATGGGGGCAAATGTCTAGACTTGGTGGACAAGTACCTCTGCCGTTGTCC|TCCCGGAACCACAGGTGGGGCCTGGGGCTGGGCTATAACAGTACGTGGGGGTGTGTGGGGGTCTGTGATGAATTTGTAACTGGTGCTTGACAATAGTAGGTACTCTTGCCATACTTCTTCCCTCCCT
Notch3	Del 1|0	53.9045	9.46896	30.5567	0	0	0	28.2174	0	0	26.6098	0	0	0	0	18.6691	39.6827	0	0	0	0	0	0	1.50667	1.18807	0.224964	0.717179	CATACGCTGTGAGAGCCAGGTGGATGAGTGCCGCAGCCAGCCCTGTCGATATGGGGGCAAATGTCTAGACTTGGTGGACAAGTACCTCTGCCGTTGTC-|TCCCGGAACCACAGGTGGGGCCTGGGGCTGGGCTATAACAGTACGTGGGGGTGTGTGGGGGTCTGTGATGAATTTGTAACTGGTGCTTGACAATAGTAGGTACTCTTGCCATACTTCTTCCCTCCCT
Notch3	Del 3|0	9.23608	9.90526	20.6457	0	11.8078	0	0	0	31.0785	0	0	0	0	0	0	0	0	0	14.0507	0	17.4797	0	0	0	0	0	CATACGCTGTGAGAGCCAGGTGGATGAGTGCCGCAGCCAGCCCTGTCGATATGGGGGCAAATGTCTAGACTTGGTGGACAAGTACCTCTGCCGTTG---|TCCCGGAACCACAGGTGGGGCCTGGGGCTGGGCTATAACAGTACGTGGGGGTGTGTGGGGGTCTGTGATGAATTTGTAACTGGTGCTTGACAATAGTAGGTACTCTTGCCATACTTCTTCCCTCCCT
Notch3	Del 0|1	0	9.7154	0	0	0	0	0	17.8262	0	0	16.7451	0	0	20.2793	18.3438	23.8684	0	0	0	12.3951	0	0	0.953691	1.60504	2.57127	1.50574	CATACGCTGTGAGAGCCAGGTGGATGAGTGCCGCAGCCAGCCCTGTCGATATGGGGGCAAATGTCTAGACTTGGTGGACAAGTACCTCTGCCGTTGTCC|-CCCGGAACCACAGGTGGGGCCTGGGGCTGGGCTATAACAGTACGTGGGGGTGTGTGGGGGTCTGTGATGAATTTGTAACTGGTGCTTGACAATAGTAGGTACTCTTGCCATACTTCTTCCCTCCCT
Notch3	Ins 44 bp	0	7.91909	0	0	0	0	0	0	0	0	0	0	0	0	0	0	0	0	0	0	0	0	0	0	0	0	CATACGCTGTGAGAGCCAGGTGGATGAGTGCCGCAGCCAGCCCTGTCGATATGGGGGCAAATGTCTAGACTTGGTGGACAAGTACCTCTGCCGTTGTCC|{GCTGCTTGCAAACAAAAAAACCACCGCTACCAGCGGTGGTTTGT}TCCCGGAACCACAGGTGGGGCCTGGGGCTGGGCTATAACAGTACGTGGGGGTGTGTGGGGGTCTGTGATGAATTTGTAACTGGTGCTTGACAATAGTAGGTACTCTTGCCATACTTCTTCCCTCCCT
Notch3	Del 15|0	0	0	0	37.6062	0	0	0	0	0	0	0	0	0	0	0	0	0	0	0	0	0	0	0	0	0	0	CATACGCTGTGAGAGCCAGGTGGATGAGTGCCGCAGCCAGCCCTGTCGATATGGGGGCAAATGTCTAGACTTGGTGGACAAGT---------------C|TCCCGGAACCACAGGTGGGGCCTGGGGCTGGGCTATAACAGTACGTGGGGGTGTGTGGGGGTCTGTGATGAATTTGTAACTGGTGCTTGACAATAGTAGGTACTCTTGCCATACTTCTTCCCTCCCT
Notch3	Del 6|5	0	0	0	36.2735	11.3433	0	0	0	0	0	0	0	0	0	0	0	0	0	0	0	0	0	0	0	0	0	CATACGCTGTGAGAGCCAGGTGGATGAGTGCCGCAGCCAGCCCTGTCGATATGGGGGCAAATGTCTAGACTTGGTGGACAAGTACCTCTGCCG------|-----GAACCACAGGTGGGGCCTGGGGCTGGGCTATAACAGTACGTGGGGGTGTGTGGGGGTCTGTGATGAATTTGTAACTGGTGCTTGACAATAGTAGGTACTCTTGCCATACTTCTTCCCTCCCT
Notch3	Del 6|0	0	0	0	0	0	0	0	11.784	0	0	0	0	0	0	0	0	0	0	0	0	0	0	0	0	0	0	CATACGCTGTGAGAGCCAGGTGGATGAGTGCCGCAGCCAGCCCTGTCGATATGGGGGCAAATGTCTAGACTTGGTGGACAAGTACCTCTGCCG------|TCCCGGAACCACAGGTGGGGCCTGGGGCTGGGCTATAACAGTACGTGGGGGTGTGTGGGGGTCTGTGATGAATTTGTAACTGGTGCTTGACAATAGTAGGTACTCTTGCCATACTTCTTCCCTCCCT
Notch3	Del 2|0	0	0	0	0	0	0	0	0	31.9641	0	0	0	0	0	0	0	0	0	0	0	0	0	0	0	0	0	CATACGCTGTGAGAGCCAGGTGGATGAGTGCCGCAGCCAGCCCTGTCGATATGGGGGCAAATGTCTAGACTTGGTGGACAAGTACCTCTGCCGTTGT--|TCCCGGAACCACAGGTGGGGCCTGGGGCTGGGCTATAACAGTACGTGGGGGTGTGTGGGGGTCTGTGATGAATTTGTAACTGGTGCTTGACAATAGTAGGTACTCTTGCCATACTTCTTCCCTCCCT
Notch3	Del 0|2	0	0	0	0	0	0	0	0	0	0	16.0976	34.2914	0	0	0	0	0	0	0	6.52751	0	0	0	0	0	0	CATACGCTGTGAGAGCCAGGTGGATGAGTGCCGCAGCCAGCCCTGTCGATATGGGGGCAAATGTCTAGACTTGGTGGACAAGTACCTCTGCCGTTGTCC|--CCGGAACCACAGGTGGGGCCTGGGGCTGGGCTATAACAGTACGTGGGGGTGTGTGGGGGTCTGTGATGAATTTGTAACTGGTGCTTGACAATAGTAGGTACTCTTGCCATACTTCTTCCCTCCCT
Notch3	Del 8|0	0	0	0	0	0	0	0	0	0	0	0	32.5223	0	0	0	0	0	0	0	0	0	0	0	0	0	0	CATACGCTGTGAGAGCCAGGTGGATGAGTGCCGCAGCCAGCCCTGTCGATATGGGGGCAAATGTCTAGACTTGGTGGACAAGTACCTCTGC--------|TCCCGGAACCACAGGTGGGGCCTGGGGCTGGGCTATAACAGTACGTGGGGGTGTGTGGGGGTCTGTGATGAATTTGTAACTGGTGCTTGACAATAGTAGGTACTCTTGCCATACTTCTTCCCTCCCT
Notch3	Del 5|0	0	0	0	0	0	0	0	0	0	0	0	0	77.4835	0	0	0	0	0	0	0	0	0	0	0	0	0	CATACGCTGTGAGAGCCAGGTGGATGAGTGCCGCAGCCAGCCCTGTCGATATGGGGGCAAATGTCTAGACTTGGTGGACAAGTACCTCTGCCG-----C|TCCCGGAACCACAGGTGGGGCCTGGGGCTGGGCTATAACAGTACGTGGGGGTGTGTGGGGGTCTGTGATGAATTTGTAACTGGTGCTTGACAATAGTAGGTACTCTTGCCATACTTCTTCCCTCCCT
Notch3	Del 4|0	0	0	0	0	0	0	0	0	0	0	0	0	0	20.033	0	0	0	0	0	0	0	0	0	0	0	0	CATACGCTGTGAGAGCCAGGTGGATGAGTGCCGCAGCCAGCCCTGTCGATATGGGGGCAAATGTCTAGACTTGGTGGACAAGTACCTCTGCCGT----C|TCCCGGAACCACAGGTGGGGCCTGGGGCTGGGCTATAACAGTACGTGGGGGTGTGTGGGGGTCTGTGATGAATTTGTAACTGGTGCTTGACAATAGTAGGTACTCTTGCCATACTTCTTCCCTCCCT
Notch3	Del 14|44	0	0	0	0	0	0	0	0	0	0	0	0	0	0	0	0	41.5543	0	0	0	0	0	0	0	0	0	CATACGCTGTGAGAGCCAGGTGGATGAGTGCCGCAGCCAGCCCTGTCGATATGGGGGCAAATGTCTAGACTTGGTGGACAAGTAC--------------|--------------------------------------------GTGGGGGTGTGTGGGGGTCTGTGATGAATTTGTAACTGGTGCTTGACAATAGTAGGTACTCTTGCCATACTTCTTCCCTCCCT
Notch3	Del 29|12	0	0	0	0	0	0	0	0	0	0	0	0	0	0	0	0	35.3378	0	0	0	0	0	0	0	0	0	CATACGCTGTGAGAGCCAGGTGGATGAGTGCCGCAGCCAGCCCTGTCGATATGGGGGCAAATGTCTAGAC-----------------------------|------------AGGTGGGGCCTGGGGCTGGGCTATAACAGTACGTGGGGGTGTGTGGGGGTCTGTGATGAATTTGTAACTGGTGCTTGACAATAGTAGGTACTCTTGCCATACTTCTTCCCTCCCT
Notch3	Del 16|0	0	0	0	0	0	0	0	0	0	0	0	0	0	0	0	0	0	0	14.3488	0	0	0	0	0	0	0	CATACGCTGTGAGAGCCAGGTGGATGAGTGCCGCAGCCAGCCCTGTCGATATGGGGGCAAATGTCTAGACTTGGTGGACAAG----------------C|TCCCGGAACCACAGGTGGGGCCTGGGGCTGGGCTATAACAGTACGTGGGGGTGTGTGGGGGTCTGTGATGAATTTGTAACTGGTGCTTGACAATAGTAGGTACTCTTGCCATACTTCTTCCCTCCCT
Notch3	Del 14|0	0	0	0	0	0	0	0	0	0	0	0	0	0	0	0	0	0	0	0	0	13.5786	0	0	0	0	0	CATACGCTGTGAGAGCCAGGTGGATGAGTGCCGCAGCCAGCCCTGTCGATATGGGGGCAAATGTCTAGACTTGGTGGACAAGTAC--------------|TCCCGGAACCACAGGTGGGGCCTGGGGCTGGGCTATAACAGTACGTGGGGGTGTGTGGGGGTCTGTGATGAATTTGTAACTGGTGCTTGACAATAGTAGGTACTCTTGCCATACTTCTTCCCTCCCT
Notch3	Ins 1 C	0	0	0	0	0	0	0	0	0	0	0	0	0	0	0	0	0	0	0	0	0	0	0.667851	1.44199	2.55018	0.891493	CATACGCTGTGAGAGCCAGGTGGATGAGTGCCGCAGCCAGCCCTGTCGATATGGGGGCAAATGTCTAGACTTGGTGGACAAGTACCTCTGCCGTTGTCC|{C}TCCCGGAACCACAGGTGGGGCCTGGGGCTGGGCTATAACAGTACGTGGGGGTGTGTGGGGGTCTGTGATGAATTTGTAACTGGTGCTTGACAATAGTAGGTACTCTTGCCATACTTCTTCCCTCCCT
P53	WT	21.5752	56.925	100	45.276	87.1491	47.263	69.4182	64.797	36.1388	48.372	68.3252	32.5417	12.4568	58.1851	64.8913	23.572	38.7563	80.5473	74.1467	70.9431	65.8754	63.5067	94.2104	97.9253	95.747	95.1059	AGCCATAGGGGTTTGTTTGTTTGTATGTTTTTTAATTGACAAGTTATGCATCCATACAGTACACAATCTCTTCTCTCTACAGATGACTGCCATGGAGGAGTCACAGTCGGATATCAGCCTCGAGCTCCCTCTGA|GCCAGGAGACATTTTCAGGCTTATGGAAACTGTGAGTGGATCTTTTTGGGGCCCTTAAGATACATCCCGCCATACCTGTATCCTCCCCTTGCCTGAGAGAA
P53	Del 1|0	71.1288	33.4126	0	0	12.8509	0	30.5818	35.203	0	25.2705	0	32.6082	87.5432	19.6577	35.1087	76.428	61.2437	0	14.9394	15.2337	34.1246	17.896	2.03161	1.12951	1.187	1.7575	AGCCATAGGGGTTTGTTTGTTTGTATGTTTTTTAATTGACAAGTTATGCATCCATACAGTACACAATCTCTTCTCTCTACAGATGACTGCCATGGAGGAGTCACAGTCGGATATCAGCCTCGAGCTCCCTCTG-|GCCAGGAGACATTTTCAGGCTTATGGAAACTGTGAGTGGATCTTTTTGGGGCCCTTAAGATACATCCCGCCATACCTGTATCCTCCCCTTGCCTGAGAGAA
P53	Del 23|27	7.29599	0	0	0	0	0	0	0	0	0	0	0	0	0	0	0	0	0	0	0	0	0	0	0	0	0	AGCCATAGGGGTTTGTTTGTTTGTATGTTTTTTAATTGACAAGTTATGCATCCATACAGTACACAATCTCTTCTCTCTACAGATGACTGCCATGGAGGAGTCACAGTCGGA-----------------------|---------------------------AACTGTGAGTGGATCTTTTTGGGGCCCTTAAGATACATCCCGCCATACCTGTATCCTCCCCTTGCCTGAGAGAA
P53	Del 4|0	0	9.66239	0	0	0	0	0	0	0	0	0	0	0	0	0	0	0	0	0	0	0	0	0	0	0	0	AGCCATAGGGGTTTGTTTGTTTGTATGTTTTTTAATTGACAAGTTATGCATCCATACAGTACACAATCTCTTCTCTCTACAGATGACTGCCATGGAGGAGTCACAGTCGGATATCAGCCTCGAGCTCCCT----|GCCAGGAGACATTTTCAGGCTTATGGAAACTGTGAGTGGATCTTTTTGGGGCCCTTAAGATACATCCCGCCATACCTGTATCCTCCCCTTGCCTGAGAGAA
P53	Del 0|1	0	0	0	54.724	0	0	0	0	0	0	0	0	0	0	0	0	0	0	0	0	0	0	0	0	0	0	AGCCATAGGGGTTTGTTTGTTTGTATGTTTTTTAATTGACAAGTTATGCATCCATACAGTACACAATCTCTTCTCTCTACAGATGACTGCCATGGAGGAGTCACAGTCGGATATCAGCCTCGAGCTCCCTCTGA|-CCAGGAGACATTTTCAGGCTTATGGAAACTGTGAGTGGATCTTTTTGGGGCCCTTAAGATACATCCCGCCATACCTGTATCCTCCCCTTGCCTGAGAGAA
P53	Del 6|10	0	0	0	0	0	26.9465	0	0	0	0	0	0	0	0	0	0	0	0	0	0	0	0	0	0	0	0	AGCCATAGGGGTTTGTTTGTTTGTATGTTTTTTAATTGACAAGTTATGCATCCATACAGTACACAATCTCTTCTCTCTACAGATGACTGCCATGGAGGAGTCACAGTCGGATATCAGCCTCGAGCTCC------|----------ATTTTCAGGCTTATGGAAACTGTGAGTGGATCTTTTTGGGGCCCTTAAGATACATCCCGCCATACCTGTATCCTCCCCTTGCCTGAGAGAA
P53	Del 2|0	0	0	0	0	0	25.7904	0	0	31.7286	26.3575	16.3423	0	0	0	0	0	0	0	0	0	0	0	0	0	0	0	AGCCATAGGGGTTTGTTTGTTTGTATGTTTTTTAATTGACAAGTTATGCATCCATACAGTACACAATCTCTTCTCTCTACAGATGACTGCCATGGAGGAGTCACAGTCGGATATCAGCCTCGAGCTCCCTCT--|GCCAGGAGACATTTTCAGGCTTATGGAAACTGTGAGTGGATCTTTTTGGGGCCCTTAAGATACATCCCGCCATACCTGTATCCTCCCCTTGCCTGAGAGAA
P53	Del 5|9	0	0	0	0	0	0	0	0	32.1326	0	0	0	0	0	0	0	0	0	0	0	0	0	0	0	0	0	AGCCATAGGGGTTTGTTTGTTTGTATGTTTTTTAATTGACAAGTTATGCATCCATACAGTACACAATCTCTTCTCTCTACAGATGACTGCCATGGAGGAGTCACAGTCGGATATCAGCCTCGAGCTCCC-----|---------CATTTTCAGGCTTATGGAAACTGTGAGTGGATCTTTTTGGGGCCCTTAAGATACATCCCGCCATACCTGTATCCTCCCCTTGCCTGAGAGAA
P53	Ins 1 A	0	0	0	0	0	0	0	0	0	0	15.3325	0	0	0	0	0	0	0	0	13.8232	0	18.5973	0.748314	0.514402	1.0023	0.682359	AGCCATAGGGGTTTGTTTGTTTGTATGTTTTTTAATTGACAAGTTATGCATCCATACAGTACACAATCTCTTCTCTCTACAGATGACTGCCATGGAGGAGTCACAGTCGGATATCAGCCTCGAGCTCCCTCTGA{T}|GCCAGGAGACATTTTCAGGCTTATGGAAACTGTGAGTGGATCTTTTTGGGGCCCTTAAGATACATCCCGCCATACCTGTATCCTCCCCTTGCCTGAGAGAA
P53	Del 8|21	0	0	0	0	0	0	0	0	0	0	0	0	0	22.1572	0	0	0	0	0	0	0	0	0	0	0	0	AGCCATAGGGGTTTGTTTGTTTGTATGTTTTTTAATTGACAAGTTATGCATCCATACAGTACACAATCTCTTCTCTCTACAGATGACTGCCATGGAGGAGTCACAGTCGGATATCAGCCTCGAGCT--------|---------------------TATGGAAACTGTGAGTGGATCTTTTTGGGGCCCTTAAGATACATCCCGCCATACCTGTATCCTCCCCTTGCCTGAGAGAA
P53	Ins 1 T	0	0	0	0	0	0	0	0	0	0	0	0	0	0	0	0	0	19.4527	0	0	0	0	0	0	0	0	AGCCATAGGGGTTTGTTTGTTTGTATGTTTTTTAATTGACAAGTTATGCATCCATACAGTACACAATCTCTTCTCTCTACAGATGACTGCCATGGAGGAGTCACAGTCGGATATCAGCCTCGAGCTCCCTCTGA|GCCAGGAGACATTTTCAGGCTTATGGAAACTGTGAGTGGATCTTTTTGGGGCCCTTAAGATACATCCCGCCATACCTGTATCCTCCCCTTGCCTGAGAGAA
P53	Del 4|0	0	0	0	0	0	0	0	0	0	0	0	34.8501	0	0	0	0	0	0	0	0	0	0	0	0	0	0	AGCCATAGGGGTTTGTTTGTTTGTATGTTTTTTAATTGACAAGTTATGCATCCATACAGTACACAATCTCTTCTCTCTACAGATGACTGCCATGGAGGAGTCACAGTCGGATATCAGCCTCGAGCTCCC----A|GCCAGGAGACATTTTCAGGCTTATGGAAACTGTGAGTGGATCTTTTTGGGGCCCTTAAGATACATCCCGCCATACCTGTATCCTCCCCTTGCCTGAGAGAA
P53	Del 5|3	0	0	0	0	0	0	0	0	0	0	0	0	0	0	0	0	0	0	10.9139	0	0	0	0	0	0	0	AGCCATAGGGGTTTGTTTGTTTGTATGTTTTTTAATTGACAAGTTATGCATCCATACAGTACACAATCTCTTCTCTCTACAGATGACTGCCATGGAGGAGTCACAGTCGGATATCAGCCTCGAGCTCCC-----|---AGGAGACATTTTCAGGCTTATGGAAACTGTGAGTGGATCTTTTTGGGGCCCTTAAGATACATCCCGCCATACCTGTATCCTCCCCTTGCCTGAGAGAA
P53	Del 8|0	0	0	0	0	0	0	0	0	0	0	0	0	0	0	0	0	0	0	0	0	0	0	3.00967	0.430734	2.06371	2.4542	AGCCATAGGGGTTTGTTTGTTTGTATGTTTTTTAATTGACAAGTTATGCATCCATACAGTACACAATCTCTTCTCTCTACAGATGACTGCCATGGAGGAGTCACAGTCGGATATCAGCCTCGAGCT--------|GCCAGGAGACATTTTCAGGCTTATGGAAACTGTGAGTGGATCTTTTTGGGGCCCTTAAGATACATCCCGCCATACCTGTATCCTCCCCTTGCCTGAGAGAA
Pik3r1	WT	92.2522	100	72.4965	26.3087	86.4933	47.3733	85.3928	76.4645	34.4623	47.7328	82.9201	100	100	100	77.8704	100	100	84.0901	95.0615	100	82.0756	100	96.6803	93.5914	96.7366	99.3524	AGTGTGTGGTTACTCAAAGTTGAAAAGTAAGTATGGTCTTATACTGTGTTCATTTTAGGGAAGAAGTGAATGAAAAACTCCGAGACACTGCTGATGGGACCTTTT|TGGTACGAGACGCATCTACTAAAATGCACGGCGATTACACTCTTACACTAAGGTGAGCCAGGAAGTCAGCTGTAATTGCGATGTCTCAGTTGTCATGA
Pik3r1	Del 1|0	7.74781	0	27.5035	0	0	0	0	0	0	0	0	0	0	0	0	0	0	0	4.9385	0	0	0	1.62946	3.87116	2.22995	0.457509	AGTGTGTGGTTACTCAAAGTTGAAAAGTAAGTATGGTCTTATACTGTGTTCATTTTAGGGAAGAAGTGAATGAAAAACTCCGAGACACTGCTGATGGGACCTTT-|TGGTACGAGACGCATCTACTAAAATGCACGGCGATTACACTCTTACACTAAGGTGAGCCAGGAAGTCAGCTGTAATTGCGATGTCTCAGTTGTCATGA
Pik3r1	Del 8|0	0	0	0	37.8921	0	0	0	0	0	0	0	0	0	0	0	0	0	0	0	0	0	0	0	0	0	0	AGTGTGTGGTTACTCAAAGTTGAAAAGTAAGTATGGTCTTATACTGTGTTCATTTTAGGGAAGAAGTGAATGAAAAACTCCGAGACACTGCTGATGG--------|TGGTACGAGACGCATCTACTAAAATGCACGGCGATTACACTCTTACACTAAGGTGAGCCAGGAAGTCAGCTGTAATTGCGATGTCTCAGTTGTCATGA
Pik3r1	Del 0|4	0	0	0	35.7992	0	0	0	0	0	0	0	0	0	0	0	0	0	0	0	0	0	0	0	0	0	0	AGTGTGTGGTTACTCAAAGTTGAAAAGTAAGTATGGTCTTATACTGTGTTCATTTTAGGGAAGAAGTGAATGAAAAACTCCGAGACACTGCTGATGGGACCTTTT|----ACGAGACGCATCTACTAAAATGCACGGCGATTACACTCTTACACTAAGGTGAGCCAGGAAGTCAGCTGTAATTGCGATGTCTCAGTTGTCATGA
Pik3r1	Del 4|11	0	0	0	0	13.5067	0	0	0	0	0	0	0	0	0	0	0	0	0	0	0	0	0	0	0	0	0	AGTGTGTGGTTACTCAAAGTTGAAAAGTAAGTATGGTCTTATACTGTGTTCATTTTAGGGAAGAAGTGAATGAAAAACTCCGAGACACTGCTGATGGGACC----|-----------GCATCTACTAAAATGCACGGCGATTACACTCTTACACTAAGGTGAGCCAGGAAGTCAGCTGTAATTGCGATGTCTCAGTTGTCATGA
Pik3r1	Del 2|2	0	0	0	0	0	27.1559	0	0	0	0	0	0	0	0	0	0	0	0	0	0	0	0	0	0	0	0	AGTGTGTGGTTACTCAAAGTTGAAAAGTAAGTATGGTCTTATACTGTGTTCATTTTAGGGAAGAAGTGAATGAAAAACTCCGAGACACTGCTGATGGGACCTT--|--GTACGAGACGCATCTACTAAAATGCACGGCGATTACACTCTTACACTAAGGTGAGCCAGGAAGTCAGCTGTAATTGCGATGTCTCAGTTGTCATGA
Pik3r1	Del 0|7 (D8 I1T)	0	0	0	0	0	25.4708	0	0	0	0	0	0	0	0	0	0	0	0	0	0	0	0	0	0	0	0	AGTGTGTGGTTACTCAAAGTTGAAAAGTAAGTATGGTCTTATACTGTGTTCATTTTAGGGAAGAAGTGAATGAAAAACTCCGAGACACTGCTGATGGGACCTTTT|T-------GACGCATCTACTAAAATGCACGGCGATTACACTCTTACACTAAGGTGAGCCAGGAAGTCAGCTGTAATTGCGATGTCTCAGTTGTCATGA
Pik3r1	Del 0|8 (D9 I1T)	0	0	0	0	0	0	14.6072	0	0	0	0	0	0	0	0	0	0	0	0	0	0	0	0	0	0	0	AGTGTGTGGTTACTCAAAGTTGAAAAGTAAGTATGGTCTTATACTGTGTTCATTTTAGGGAAGAAGTGAATGAAAAACTCCGAGACACTGCTGATGGGACCTTTT|T--------ACGCATCTACTAAAATGCACGGCGATTACACTCTTACACTAAGGTGAGCCAGGAAGTCAGCTGTAATTGCGATGTCTCAGTTGTCATGA
Pik3r1	Del 4|0	0	0	0	0	0	0	0	23.5355	32.7615	0	0	0	0	0	0	0	0	0	0	0	0	0	0	0	0	0	AGTGTGTGGTTACTCAAAGTTGAAAAGTAAGTATGGTCTTATACTGTGTTCATTTTAGGGAAGAAGTGAATGAAAAACTCCGAGACACTGCTGATGGGACC----|TGGTACGAGACGCATCTACTAAAATGCACGGCGATTACACTCTTACACTAAGGTGAGCCAGGAAGTCAGCTGTAATTGCGATGTCTCAGTTGTCATGA
Pik3r1	Del 3|0	0	0	0	0	0	0	0	0	32.7762	26.8206	0	0	0	0	0	0	0	0	0	0	0	0	0	0	0	0	AGTGTGTGGTTACTCAAAGTTGAAAAGTAAGTATGGTCTTATACTGTGTTCATTTTAGGGAAGAAGTGAATGAAAAACTCCGAGACACTGCTGATGGGACCT---|TGGTACGAGACGCATCTACTAAAATGCACGGCGATTACACTCTTACACTAAGGTGAGCCAGGAAGTCAGCTGTAATTGCGATGTCTCAGTTGTCATGA
Pik3r1	Del 0|3	0	0	0	0	0	0	0	0	0	25.4467	0	0	0	0	0	0	0	0	0	0	0	0	0	0	0	0	AGTGTGTGGTTACTCAAAGTTGAAAAGTAAGTATGGTCTTATACTGTGTTCATTTTAGGGAAGAAGTGAATGAAAAACTCCGAGACACTGCTGATGGGACCTTTT|---TACGAGACGCATCTACTAAAATGCACGGCGATTACACTCTTACACTAAGGTGAGCCAGGAAGTCAGCTGTAATTGCGATGTCTCAGTTGTCATGA
Pik3r1	Ins 1 T	0	0	0	0	0	0	0	0	0	0	17.0799	0	0	0	0	0	0	15.9099	0	0	17.9244	0	0	0	0	0	AGTGTGTGGTTACTCAAAGTTGAAAAGTAAGTATGGTCTTATACTGTGTTCATTTTAGGGAAGAAGTGAATGAAAAACTCCGAGACACTGCTGATGGGACCTTTT|{T}TGGTACGAGACGCATCTACTAAAATGCACGGCGATTACACTCTTACACTAAGGTGAGCCAGGAAGTCAGCTGTAATTGCGATGTCTCAGTTGTCATGA
Pik3r1	Del 3|2	0	0	0	0	0	0	0	0	0	0	0	0	0	0	22.1296	0	0	0	0	0	0	0	0	0	0	0	AGTGTGTGGTTACTCAAAGTTGAAAAGTAAGTATGGTCTTATACTGTGTTCATTTTAGGGAAGAAGTGAATGAAAAACTCCGAGACACTGCTGATGGGACCT---|--GTACGAGACGCATCTACTAAAATGCACGGCGATTACACTCTTACACTAAGGTGAGCCAGGAAGTCAGCTGTAATTGCGATGTCTCAGTTGTCATGA
Pik3r1	Del 2|6	0	0	0	0	0	0	0	0	0	0	0	0	0	0	0	0	0	0	0	0	0	0	1.69027	2.53743	1.03345	0.190076	AGTGTGTGGTTACTCAAAGTTGAAAAGTAAGTATGGTCTTATACTGTGTTCATTTTAGGGAAGAAGTGAATGAAAAACTCCGAGACACTGCTGATGGGACCTT--|------GAGACGCATCTACTAAAATGCACGGCGATTACACTCTTACACTAAGGTGAGCCAGGAAGTCAGCTGTAATTGCGATGTCTCAGTTGTCATGA
Pten	WT	22.6707	49.241	49.1864	24.765	76.8758	46.5244	69.9356	65.0987	38.1056	46.4362	71.7584	31.3625	9.96171	62.3805	63.2587	20.8713	23.3414	39.3705	82.2776	66.1204	67.2515	78.2071	59.6115	68.5542	62.9818	65.3923	CTTTTGTCTCCCTCCTCCCTCTGCCCCCTGGGCCTATCAGGGAGTCACAATTCCCAGTCAGAGGCGCTATGTATATTATTATAGCTACCTGCTAAAAAATCACCTGGATTACAGAC|CCGTGGCACTGCTGTTTCACAAGATGATGTTTGAAACTATTCCAATGTTCAGTGGCGGAACTTGCAGTAAGTGCTCTAAATTCTTAGCTGTCTGTGTGTCGGA
Pten	Del 4|0	41.1529	0	0	35.047	0	0	0	34.9013	31.0455	0	0	33.9041	43.4097	0	0	37.798	37.5982	0	0	0	0	0	12.084	8.69651	4.258	1.75693	CTTTTGTCTCCCTCCTCCCTCTGCCCCCTGGGCCTATCAGGGAGTCACAATTCCCAGTCAGAGGCGCTATGTATATTATTATAGCTACCTGCTAAAAAATCACCTGGATTAC----|CCGTGGCACTGCTGTTTCACAAGATGATGTTTGAAACTATTCCAATGTTCAGTGGCGGAACTTGCAGTAAGTGCTCTAAATTCTTAGCTGTCTGTGTGTCGGA
Pten	Del 5|0	23.6522	6.81847	0	0	0	0	0	0	0	0	0	0	0	0	0	0	0	0	0	0	0	0	0	0	0	0	CTTTTGTCTCCCTCCTCCCTCTGCCCCCTGGGCCTATCAGGGAGTCACAATTCCCAGTCAGAGGCGCTATGTATATTATTATAGCTACCTGCTAAAAAATCACCTGGATTA-----|CCGTGGCACTGCTGTTTCACAAGATGATGTTTGAAACTATTCCAATGTTCAGTGGCGGAACTTGCAGTAAGTGCTCTAAATTCTTAGCTGTCTGTGTGTCGGA
Pten	Del 22|5	6.89798	0	0	0	0	0	0	0	0	0	0	0	0	0	0	0	0	0	0	0	0	0	0	0	0	0	CTTTTGTCTCCCTCCTCCCTCTGCCCCCTGGGCCTATCAGGGAGTCACAATTCCCAGTCAGAGGCGCTATGTATATTATTATAGCTACCTGCTA----------------------|-----GCACTGCTGTTTCACAAGATGATGTTTGAAACTATTCCAATGTTCAGTGGCGGAACTTGCAGTAAGTGCTCTAAATTCTTAGCTGTCTGTGTGTCGGA
Pten	Del 12|0	5.62621	0	0	0	0	0	0	0	0	0	0	0	0	0	0	0	0	0	0	0	0	0	0	0	0	0	CTTTTGTCTCCCTCCTCCCTCTGCCCCCTGGGCCTATCAGGGAGTCACAATTCCCAGTCAGAGGCGCTATGTATATTATTATAGCTACCTGCTAAAAAATCACC------------|CCGTGGCACTGCTGTTTCACAAGATGATGTTTGAAACTATTCCAATGTTCAGTGGCGGAACTTGCAGTAAGTGCTCTAAATTCTTAGCTGTCTGTGTGTCGGA
Pten	Del 9|0	0	7.97892	0	0	0	0	0	0	0	0	0	0	0	0	0	0	0	0	0	0	0	0	0	0	0	0	CTTTTGTCTCCCTCCTCCCTCTGCCCCCTGGGCCTATCAGGGAGTCACAATTCCCAGTCAGAGGCGCTATGTATATTATTATAGCTACCTGCTAAAAAATCACCTGG---------|CCGTGGCACTGCTGTTTCACAAGATGATGTTTGAAACTATTCCAATGTTCAGTGGCGGAACTTGCAGTAAGTGCTCTAAATTCTTAGCTGTCTGTGTGTCGGA
Pten	Del 7|0	0	7.5461	0	0	0	0	0	0	0	0	0	0	0	0	0	0	0	0	0	0	0	0	0	0	0	0	CTTTTGTCTCCCTCCTCCCTCTGCCCCCTGGGCCTATCAGGGAGTCACAATTCCCAGTCAGAGGCGCTATGTATATTATTATAGCTACCTGCTAAAAAATCACCTGGAT-------|CCGTGGCACTGCTGTTTCACAAGATGATGTTTGAAACTATTCCAATGTTCAGTGGCGGAACTTGCAGTAAGTGCTCTAAATTCTTAGCTGTCTGTGTGTCGGA
Pten	Del 0|2	0	7.28892	0	0	0	0	0	0	0	0	0	0	0	0	0	0	0	19.5251	0	0	0	21.7929	0	0	0	0	CTTTTGTCTCCCTCCTCCCTCTGCCCCCTGGGCCTATCAGGGAGTCACAATTCCCAGTCAGAGGCGCTATGTATATTATTATAGCTACCTGCTAAAAAATCACCTGGATTACAGAC|--GTGGCACTGCTGTTTCACAAGATGATGTTTGAAACTATTCCAATGTTCAGTGGCGGAACTTGCAGTAAGTGCTCTAAATTCTTAGCTGTCTGTGTGTCGGA
Pten	Del 1|0	0	7.23247	0	0	0	0	0	0	0	0	0	0	0	0	0	0	0	0	0	0	0	0	1.31559	1.55154	12.9671	17.6431	CTTTTGTCTCCCTCCTCCCTCTGCCCCCTGGGCCTATCAGGGAGTCACAATTCCCAGTCAGAGGCGCTATGTATATTATTATAGCTACCTGCTAAAAAATCACCTGGATTACAG-C|CCGTGGCACTGCTGTTTCACAAGATGATGTTTGAAACTATTCCAATGTTCAGTGGCGGAACTTGCAGTAAGTGCTCTAAATTCTTAGCTGTCTGTGTGTCGGA
Pten	Ins 2 AC	0	7.11329	0	0	0	0	0	0	0	0	0	0	0	0	0	0	0	0	0	0	0	0	0	0	0	0	CTTTTGTCTCCCTCCTCCCTCTGCCCCCTGGGCCTATCAGGGAGTCACAATTCCCAGTCAGAGGCGCTATGTATATTATTATAGCTACCTGCTAAAAAATCACCTGGATTACAGAC{AC}|CCGTGGCACTGCTGTTTCACAAGATGATGTTTGAAACTATTCCAATGTTCAGTGGCGGAACTTGCAGTAAGTGCTCTAAATTCTTAGCTGTCTGTGTGTCGGA
Pten	Ins 1 A	0	6.78083	0	0	0	0	0	0	0	0	0	0	0	0	0	0	0	0	0	12.1785	0	0	0	0	0	0	CTTTTGTCTCCCTCCTCCCTCTGCCCCCTGGGCCTATCAGGGAGTCACAATTCCCAGTCAGAGGCGCTATGTATATTATTATAGCTACCTGCTAAAAAATCACCTGGATTACAGAC{A}|CCGTGGCACTGCTGTTTCACAAGATGATGTTTGAAACTATTCCAATGTTCAGTGGCGGAACTTGCAGTAAGTGCTCTAAATTCTTAGCTGTCTGTGTGTCGGA
Pten	Del 1|0	0	0	50.8136	0	0	0	16.4639	0	0	53.5638	0	34.7334	0	18.4817	36.7413	0	39.0603	20.5795	0	21.7011	16.3518	0	2.22876	2.06789	0.762266	0.519414	CTTTTGTCTCCCTCCTCCCTCTGCCCCCTGGGCCTATCAGGGAGTCACAATTCCCAGTCAGAGGCGCTATGTATATTATTATAGCTACCTGCTAAAAAATCACCTGGATTACAGA-|CCGTGGCACTGCTGTTTCACAAGATGATGTTTGAAACTATTCCAATGTTCAGTGGCGGAACTTGCAGTAAGTGCTCTAAATTCTTAGCTGTCTGTGTGTCGGA
Pten	Del 15|4	0	0	0	40.188	0	0	0	0	0	0	0	0	0	0	0	0	0	0	0	0	0	0	0	0	0	0	CTTTTGTCTCCCTCCTCCCTCTGCCCCCTGGGCCTATCAGGGAGTCACAATTCCCAGTCAGAGGCGCTATGTATATTATTATAGCTACCTGCTAAAAAATC---------------|----GGCACTGCTGTTTCACAAGATGATGTTTGAAACTATTCCAATGTTCAGTGGCGGAACTTGCAGTAAGTGCTCTAAATTCTTAGCTGTCTGTGTGTCGGA
Pten	Del 2|0	0	0	0	0	12.5795	0	0	0	0	0	0	0	0	0	0	0	0	0	0	0	0	0	13.5428	10.2678	5.3807	2.41542	CTTTTGTCTCCCTCCTCCCTCTGCCCCCTGGGCCTATCAGGGAGTCACAATTCCCAGTCAGAGGCGCTATGTATATTATTATAGCTACCTGCTAAAAAATCACCTGGATTACAG--|CCGTGGCACTGCTGTTTCACAAGATGATGTTTGAAACTATTCCAATGTTCAGTGGCGGAACTTGCAGTAAGTGCTCTAAATTCTTAGCTGTCTGTGTGTCGGA
Pten	Del 5|2	0	0	0	0	10.5447	0	0	0	0	0	0	0	0	0	0	0	0	0	0	0	0	0	0	0	0	0	CTTTTGTCTCCCTCCTCCCTCTGCCCCCTGGGCCTATCAGGGAGTCACAATTCCCAGTCAGAGGCGCTATGTATATTATTATAGCTACCTGCTAAAAAATCACCTGGATTA-----|--GTGGCACTGCTGTTTCACAAGATGATGTTTGAAACTATTCCAATGTTCAGTGGCGGAACTTGCAGTAAGTGCTCTAAATTCTTAGCTGTCTGTGTGTCGGA
Pten	Del 25|3	0	0	0	0	0	28.3911	0	0	0	0	0	0	0	0	0	0	0	0	0	0	0	0	0	0	0	0	CTTTTGTCTCCCTCCTCCCTCTGCCCCCTGGGCCTATCAGGGAGTCACAATTCCCAGTCAGAGGCGCTATGTATATTATTATAGCTACCTG-------------------------|---TGGCACTGCTGTTTCACAAGATGATGTTTGAAACTATTCCAATGTTCAGTGGCGGAACTTGCAGTAAGTGCTCTAAATTCTTAGCTGTCTGTGTGTCGGA
Pten	Del 8|0	0	0	0	0	0	25.0845	0	0	0	0	0	0	0	0	0	0	0	0	0	0	0	0	0	0	0	0	CTTTTGTCTCCCTCCTCCCTCTGCCCCCTGGGCCTATCAGGGAGTCACAATTCCCAGTCAGAGGCGCTATGTATATTATTATAGCTACCTGCTAAAAAATCACCTGGA--------|CCGTGGCACTGCTGTTTCACAAGATGATGTTTGAAACTATTCCAATGTTCAGTGGCGGAACTTGCAGTAAGTGCTCTAAATTCTTAGCTGTCTGTGTGTCGGA
Pten	Del 17|0	0	0	0	0	0	0	13.6006	0	0	0	0	0	0	0	0	0	0	0	0	0	0	0	0	0	0	0	CTTTTGTCTCCCTCCTCCCTCTGCCCCCTGGGCCTATCAGGGAGTCACAATTCCCAGTCAGAGGCGCTATGTATATTATTATAGCTACCTGCTAAAAA-----------------C|CCGTGGCACTGCTGTTTCACAAGATGATGTTTGAAACTATTCCAATGTTCAGTGGCGGAACTTGCAGTAAGTGCTCTAAATTCTTAGCTGTCTGTGTGTCGGA
Pten	Del 2|0	0	0	0	0	0	0	0	0	30.8489	0	0	0	0	0	0	0	0	0	0	0	0	0	0	0	0	0	CTTTTGTCTCCCTCCTCCCTCTGCCCCCTGGGCCTATCAGGGAGTCACAATTCCCAGTCAGAGGCGCTATGTATATTATTATAGCTACCTGCTAAAAAATCACCTGGATTACA--C|CCGTGGCACTGCTGTTTCACAAGATGATGTTTGAAACTATTCCAATGTTCAGTGGCGGAACTTGCAGTAAGTGCTCTAAATTCTTAGCTGTCTGTGTGTCGGA
Pten	Del 19|21	0	0	0	0	0	0	0	0	0	0	14.1498	0	0	0	0	0	0	0	0	0	0	0	0	0	0	0	CTTTTGTCTCCCTCCTCCCTCTGCCCCCTGGGCCTATCAGGGAGTCACAATTCCCAGTCAGAGGCGCTATGTATATTATTATAGCTACCTGCTAAAA-------------------|---------------------AGATGATGTTTGAAACTATTCCAATGTTCAGTGGCGGAACTTGCAGTAAGTGCTCTAAATTCTTAGCTGTCTGTGTGTCGGA
Pten	Ins 1 C	0	0	0	0	0	0	0	0	0	0	14.0918	0	0	0	0	0	0	0	0	0	0	0	0	0	0	0	CTTTTGTCTCCCTCCTCCCTCTGCCCCCTGGGCCTATCAGGGAGTCACAATTCCCAGTCAGAGGCGCTATGTATATTATTATAGCTACCTGCTAAAAAATCACCTGGATTACAGAC{C}|CCGTGGCACTGCTGTTTCACAAGATGATGTTTGAAACTATTCCAATGTTCAGTGGCGGAACTTGCAGTAAGTGCTCTAAATTCTTAGCTGTCTGTGTGTCGGA
Pten	Del 6|5	0	0	0	0	0	0	0	0	0	0	0	0	46.6286	0	0	0	0	0	0	0	0	0	0	0	0	0	CTTTTGTCTCCCTCCTCCCTCTGCCCCCTGGGCCTATCAGGGAGTCACAATTCCCAGTCAGAGGCGCTATGTATATTATTATAGCTACCTGCTAAAAAATCACCTGGATT------|-----GCACTGCTGTTTCACAAGATGATGTTTGAAACTATTCCAATGTTCAGTGGCGGAACTTGCAGTAAGTGCTCTAAATTCTTAGCTGTCTGTGTGTCGGA
Pten	Del 0|5	0	0	0	0	0	0	0	0	0	0	0	0	0	19.1378	0	0	0	20.5248	0	0	0	0	0	0	0	0	CTTTTGTCTCCCTCCTCCCTCTGCCCCCTGGGCCTATCAGGGAGTCACAATTCCCAGTCAGAGGCGCTATGTATATTATTATAGCTACCTGCTAAAAAATCACCTGGATTACAGAC|C-----CACTGCTGTTTCACAAGATGATGTTTGAAACTATTCCAATGTTCAGTGGCGGAACTTGCAGTAAGTGCTCTAAATTCTTAGCTGTCTGTGTGTCGGA
Pten	Del 29|3	0	0	0	0	0	0	0	0	0	0	0	0	0	0	0	41.3306	0	0	0	0	0	0	0	0	0	0	CTTTTGTCTCCCTCCTCCCTCTGCCCCCTGGGCCTATCAGGGAGTCACAATTCCCAGTCAGAGGCGCTATGTATATTATTATAGCTA-----------------------------|---TGGCACTGCTGTTTCACAAGATGATGTTTGAAACTATTCCAATGTTCAGTGGCGGAACTTGCAGTAAGTGCTCTAAATTCTTAGCTGTCTGTGTGTCGGA
Pten	Del 18|15	0	0	0	0	0	0	0	0	0	0	0	0	0	0	0	0	0	0	17.7224	0	0	0	0	0	0	0	CTTTTGTCTCCCTCCTCCCTCTGCCCCCTGGGCCTATCAGGGAGTCACAATTCCCAGTCAGAGGCGCTATGTATATTATTATAGCTACCTGCTAAAAA------------------|---------------TTCACAAGATGATGTTTGAAACTATTCCAATGTTCAGTGGCGGAACTTGCAGTAAGTGCTCTAAATTCTTAGCTGTCTGTGTGTCGGA
Pten	Del 2|2	0	0	0	0	0	0	0	0	0	0	0	0	0	0	0	0	0	0	0	0	16.3968	0	0	0	0	0	CTTTTGTCTCCCTCCTCCCTCTGCCCCCTGGGCCTATCAGGGAGTCACAATTCCCAGTCAGAGGCGCTATGTATATTATTATAGCTACCTGCTAAAAAATCACCTGGATTACAG--|--GTGGCACTGCTGTTTCACAAGATGATGTTTGAAACTATTCCAATGTTCAGTGGCGGAACTTGCAGTAAGTGCTCTAAATTCTTAGCTGTCTGTGTGTCGGA
Pten	Del 6|0	0	0	0	0	0	0	0	0	0	0	0	0	0	0	0	0	0	0	0	0	0	0	11.2173	8.09121	3.91136	1.36807	CTTTTGTCTCCCTCCTCCCTCTGCCCCCTGGGCCTATCAGGGAGTCACAATTCCCAGTCAGAGGCGCTATGTATATTATTATAGCTACCTGCTAAAAAATCACCTGGATT------|CCGTGGCACTGCTGTTTCACAAGATGATGTTTGAAACTATTCCAATGTTCAGTGGCGGAACTTGCAGTAAGTGCTCTAAATTCTTAGCTGTCTGTGTGTCGGA
Pten	Del 22|0 (D23 I1)	0	0	0	0	0	0	0	0	0	0	0	0	0	0	0	0	0	0	0	0	0	0	0	0.770827	9.73873	10.9049	CTTTTGTCTCCCTCCTCCCTCTGCCCCCTGGGCCTATCAGGGAGTCACAATTCCCAGTCAGAGGCGCTATGTATATTATTATAGCTACCTGCT----------------------C|CCGTGGCACTGCTGTTTCACAAGATGATGTTTGAAACTATTCCAATGTTCAGTGGCGGAACTTGCAGTAAGTGCTCTAAATTCTTAGCTGTCTGTGTGTCGGA
Rasa1	WT	47.4852	13.2909	33.4309	66.2428	89.7543	80.676	43.0431	51.4052	6.2034	70.3608	95.2907	55.2598	100	69.7104	88.3946	61.4601	24.5882	5.93577	100	90.7523	69.6319	100	83.7508	92.4527	74.4083	77.4768	AGCGTGCCGGGTCAAGTTACCCGCGGCCCTGCCGGTGGCAGCCGCCCCGTGTCCCGGGCTGGCGGACGCCGACT|TGGTTGCGGCCCTCGGTGGCGGAGCCGCGTCGGGGTCCGGGTTCCTGGGGACCGGGCCGGTGGCCGGTGTCTTGGGGGGCGCCGCGCTGACCGGCAGTGCTGCTG
Rasa1	Del 1|0	34.3195	0	6.74472	33.7572	10.2457	19.324	6.7555	0	0	29.6392	0	44.7402	0	0	11.6054	32.1732	8.94118	0	0	9.24772	5.92195	0	6.28	1.90769	3.64654	3.85187	AGCGTGCCGGGTCAAGTTACCCGCGGCCCTGCCGGTGGCAGCCGCCCCGTGTCCCGGGCTGGCGGACGCCGACT|TGGTTGCGGCCCTCGGTGGCGGAGCCGCGTCGGGGTCCGGGTTCCTGGGGACCGGGCCGGTGGCCGGTGTCTTGGGGGGCGCCGCGCTGACCGGCAGTGCTGCTG
Rasa1	Del 0|20	18.1953	0	0	0	0	0	0	0	0	0	0	0	0	0	0	0	0	0	0	0	14.5279	0	0	0	0	0	AGCGTGCCGGGTCAAGTTACCCGCGGCCCTGCCGGTGGCAGCCGCCCCGTGTCCCGGGCTGGCGGACGCCGACT|--------------------GGAGCCGCGTCGGGGTCCGGGTTCCTGGGGACCGGGCCGGTGGCCGGTGTCTTGGGGGGCGCCGCGCTGACCGGCAGTGCTGCTG
Rasa1	Ins 52bp	0	56.4279	0	0	0	0	0	0	0	0	0	0	0	0	0	0	0	0	0	0	0	0	0	0	0	0	AGCGTGCCGGGTCAAGTTACCCGCGGCCCTGCCGGTGGCAGCCGCCCCGTGTCCCGGGCTGGCGGACGCCGACT|{TTCTACTCTGTTGACAACCATTGTCTCCTCTTATTTTCTTTTCATTTTCTGT}TGGTTGCGGCCCTCGGTGGCGGAGCCGCGTCGGGGTCCGGGTTCCTGGGGACCGGGCCGGTGGCCGGTGTCTTGGGGGGCGCCGCGCTGACCGGCAGTGCTGCTG
Rasa1	Del 9|33	0	30.2812	0	0	0	0	0	0	0	0	0	0	0	0	0	0	0	0	0	0	0	0	0	0	0	0	AGCGTGCCGGGTCAAGTTACCCGCGGCCCTGCCGGTGGCAGCCGCCCCGTGTCCCGGGCTGGCGG--------- | ---------------------------------GGTCCGGGTTCCTGGGGACCGGGCCGGTGGCCGGTGTCTTGGGGGGCGCCGCGCTGACCGGCAGTGCTGCTG
Rasa1	Del 0|11	0	0	59.8244	0	0	0	0	0	0	0	0	0	0	0	0	0	0	0	0	0	0	0	0	0	0	0	AGCGTGCCGGGTCAAGTTACCCGCGGCCCTGCCGGTGGCAGCCGCCCCGTGTCCCGGGCTGGCGGACGCCGACT|-----------CTCGGTGGCGGAGCCGCGTCGGGGTCCGGGTTCCTGGGGACCGGGCCGGTGGCCGGTGTCTTGGGGGGCGCCGCGCTGACCGGCAGTGCTGCTG
Rasa1	Del 6|21	0	0	0	0	0	0	32.476	0	0	0	0	0	0	0	0	0	0	0	0	0	0	0	0	0	0	0	AGCGTGCCGGGTCAAGTTACCCGCGGCCCTGCCGGTGGCAGCCGCCCCGTGTCCCGGGCTGGCGGACG------ | ---------------------GAGCCGCGTCGGGGTCCGGGTTCCTGGGGACCGGGCCGGTGGCCGGTGTCTTGGGGGGCGCCGCGCTGACCGGCAGTGCTGCTG
Rasa1	Del 10|16	0	0	0	0	0	0	17.7254	0	0	0	0	0	0	0	0	0	0	0	0	0	0	0	0	0	0	0	AGCGTGCCGGGTCAAGTTACCCGCGGCCCTGCCGGTGGCAGCCGCCCCGTGTCCCGGGCTGGCG---------- | ----------------TGGCGGAGCCGCGTCGGGGTCCGGGTTCCTGGGGACCGGGCCGGTGGCCGGTGTCTTGGGGGGCGCCGCGCTGACCGGCAGTGCTGCTG
Rasa1	Del 0|26	0	0	0	0	0	0	0	27.1845	0	0	0	0	0	0	0	0	0	0	0	0	0	0	0	0	0	0	AGCGTGCCGGGTCAAGTTACCCGCGGCCCTGCCGGTGGCAGCCGCCCCGTGTCCCGGGCTGGCGGACGCCGACT|--------------------------GCGTCGGGGTCCGGGTTCCTGGGGACCGGGCCGGTGGCCGGTGTCTTGGGGGGCGCCGCGCTGACCGGCAGTGCTGCTG
Rasa1	Del 45|26	0	0	0	0	0	0	0	21.4103	93.7966	0	4.70927	0	0	0	0	0	10.4706	0	0	0	0	0	0	0	0	0	AGCGTGCCGGGTCAAGTTACCCGCGGCCC--------------------------------------------- | --------------------------GCGTCGGGGTCCGGGTTCCTGGGGACCGGGCCGGTGGCCGGTGTCTTGGGGGGCGCCGCGCTGACCGGCAGTGCTGCTG
Rasa1	Ins 1 T	0	0	0	0	0	0	0	0	0	0	0	0	0	30.2896	0	0	0	0	0	0	0	0	5.51268	3.62359	14.4405	12.1822	AGCGTGCCGGGTCAAGTTACCCGCGGCCCTGCCGGTGGCAGCCGCCCCGTGTCCCGGGCTGGCGGACGCCGACT|{T}TGGTTGCGGCCCTCGGTGGCGGAGCCGCGTCGGGGTCCGGGTTCCTGGGGACCGGGCCGGTGGCCGGTGTCTTGGGGGGCGCCGCGCTGACCGGCAGTGCTGCTG
Rasa1	Del 3|3	0	0	0	0	0	0	0	0	0	0	0	0	0	0	0	6.36672	0	0	0	0	0	0	0	0	0	0	AGCGTGCCGGGTCAAGTTACCCGCGGCCCTGCCGGTGGCAGCCGCCCCGTGTCCCGGGCTGGCGGACGCCG--- | ---TTGCGGCCCTCGGTGGCGGAGCCGCGTCGGGGTCCGGGTTCCTGGGGACCGGGCCGGTGGCCGGTGTCTTGGGGGGCGCCGCGCTGACCGGCAGTGCTGCTG
Rasa1	Del 0|14	0	0	0	0	0	0	0	0	0	0	0	0	0	0	0	0	56	0	0	0	0	0	0	0	0	0	AGCGTGCCGGGTCAAGTTACCCGCGGCCCTGCCGGTGGCAGCCGCCCCGTGTCCCGGGCTGGCGGACGCCGACT|--------------GGTGGCGGAGCCGCGTCGGGGTCCGGGTTCCTGGGGACCGGGCCGGTGGCCGGTGTCTTGGGGGGCGCCGCGCTGACCGGCAGTGCTGCTG
Rasa1	Del 35|20	0	0	0	0	0	0	0	0	0	0	0	0	0	0	0	0	0	52.68	0	0	0	0	0	0	0	0	AGCGTGCCGGGTCAAGTTACCCGCGGCCCTGCCGGTGGC----------------------------------- | ----------------------------GGAGCCGCGTCGGGGTCCGGGTTCCTGGGGACCGGGCCGGTGGCCGGTGTCTTGGGGGGCGCCGCGCTGACCGGCAGTGCTGCTG
Rasa1	Del 19|12	0	0	0	0	0	0	0	0	0	0	0	0	0	0	0	0	0	41.3843	0	0	0	0	0	0	0	0	AGCGTGCCGGGTCAAGTTACCCGCGGCCCTGCCGGTGGCAGCCGCCCCGTGTCCC------------------- | ------------TCGGTGGCGGAGCCGCGTCGGGGTCCGGGTTCCTGGGGACCGGGCCGGTGGCCGGTGTCTTGGGGGGCGCCGCGCTGACCGGCAGTGCTGCTG
Rasa1	Del 0|8	0	0	0	0	0	0	0	0	0	0	0	0	0	0	0	0	0	0	0	0	9.9182	0	0	0	0	0	AGCGTGCCGGGTCAAGTTACCCGCGGCCCTGCCGGTGGCAGCCGCCCCGTGTCCCGGGCTGGCGGACGCCGACT|--------GCCCTCGGTGGCGGAGCCGCGTCGGGGTCCGGGTTCCTGGGGACCGGGCCGGTGGCCGGTGTCTTGGGGGGCGCCGCGCTGACCGGCAGTGCTGCTG
Rasa1	Del 13|0	0	0	0	0	0	0	0	0	0	0	0	0	0	0	0	0	0	0	0	0	0	0	4.45648	2.01607	7.5046	6.48907	AGCGTGCCGGGTCAAGTTACCCGCGGCCCTGCCGGTGGCAGCCGCCCCGTGTCCCGGGCTG-------------|TGGTTGCGGCCCTCGGTGGCGGAGCCGCGTCGGGGTCCGGGTTCCTGGGGACCGGGCCGGTGGCCGGTGTCTTGGGGGGCGCCGCGCTGACCGGCAGTGCTGCTG
Rb1	WT	21.7176	60.6106	49.8848	45.9833	90.8904	74.9476	69.3002	100	38.3641	50.6264	67.5955	39.7085	22.3658	63.6637	71.5294	24.064	39.6105	35.4315	85.8836	89.2777	70.17	100	59.8674	60.591	51.5466	47.0976	TACAGAAACAGCTGCAATCCCCATTAATGGTTCACCTCGAACACCCAGAAGAGGTCAGAACAGGAGCGCTCGGATAGCAAAACAACTAGAAAATGAT|ACGAGGATTATCGAGGTTCTCTGTAAAGAACACGAGTGTAATATAGATGAGGTAATTTCTCTTACACTTTATTTAAAACAGCTGAAGTAGATATATATGCTAAGTCTGCCTGTCA
Rb1	Del 13|7	33.081	0	0	0	0	0	0	0	0	0	0	0	0	0	0	0	0	0	0	0	0	0	0	0	0	0	TACAGAAACAGCTGCAATCCCCATTAATGGTTCACCTCGAACACCCAGAAGAGGTCAGAACAGGAGCGCTCGGATAGCAAAACA-------------|-------TTATCGAGGTTCTCTGTAAAGAACACGAGTGTAATATAGATGAGGTAATTTCTCTTACACTTTATTTAAAACAGCTGAAGTAGATATATATGCTAAGTCTGCCTGTCA
Rb1	Del 1|0	39.7356	0	0	0	0	0	0	0	0	0	0	0	0	0	0	0	0	0	0	0	0	0	0	0	0	0	TACAGAAACAGCTGCAATCCCCATTAATGGTTCACCTCGAACACCCAGAAGAGGTCAGAACAGGAGCGCTCGGATAGCAAAACAACTAGAAAATGA-|ACGAGGATTATCGAGGTTCTCTGTAAAGAACACGAGTGTAATATAGATGAGGTAATTTCTCTTACACTTTATTTAAAACAGCTGAAGTAGATATATATGCTAAGTCTGCCTGTCA
Rb1	Del 2|0	5.46584	0	0	54.0167	0	0	0	0	0	0	0	32.2054	0	0	0	0	0	15.4905	0	0	15.0762	0	0	0	0	0	TACAGAAACAGCTGCAATCCCCATTAATGGTTCACCTCGAACACCCAGAAGAGGTCAGAACAGGAGCGCTCGGATAGCAAAACAACTAGAAAAT--T|ACGAGGATTATCGAGGTTCTCTGTAAAGAACACGAGTGTAATATAGATGAGGTAATTTCTCTTACACTTTATTTAAAACAGCTGAAGTAGATATATATGCTAAGTCTGCCTGTCA
Rb1	Ins 1 T	0	15.7001	0	0	9.10963	0	0	0	0	0	15.6701	0	77.6342	0	0	0	60.3895	16.202	0	10.7223	0	0	18.3258	19.4365	22.9932	26.3209	TACAGAAACAGCTGCAATCCCCATTAATGGTTCACCTCGAACACCCAGAAGAGGTCAGAACAGGAGCGCTCGGATAGCAAAACAACTAGAAAATGAT{T}|ACGAGGATTATCGAGGTTCTCTGTAAAGAACACGAGTGTAATATAGATGAGGTAATTTCTCTTACACTTTATTTAAAACAGCTGAAGTAGATATATATGCTAAGTCTGCCTGTCA
Rb1	Del 1|0	0	8.02087	0	0	0	0	0	0	0	25.0584	16.7344	28.0861	0	18.5678	0	0	0	16.8824	0	0	0	0	18.1601	19.7414	24.3577	25.5184	TACAGAAACAGCTGCAATCCCCATTAATGGTTCACCTCGAACACCCAGAAGAGGTCAGAACAGGAGCGCTCGGATAGCAAAACAACTAGAAAATG-T|ACGAGGATTATCGAGGTTCTCTGTAAAGAACACGAGTGTAATATAGATGAGGTAATTTCTCTTACACTTTATTTAAAACAGCTGAAGTAGATATATATGCTAAGTCTGCCTGTCA
Rb1	Del 6|2	0	7.97585	0	0	0	0	0	0	0	0	0	0	0	0	0	0	0	0	0	0	0	0	0	0	0	0	TACAGAAACAGCTGCAATCCCCATTAATGGTTCACCTCGAACACCCAGAAGAGGTCAGAACAGGAGCGCTCGGATAGCAAAACAACTAGAA------|--GAGGATTATCGAGGTTCTCTGTAAAGAACACGAGTGTAATATAGATGAGGTAATTTCTCTTACACTTTATTTAAAACAGCTGAAGTAGATATATATGCTAAGTCTGCCTGTCA
Rb1	Del 0|1	0	7.69251	0	0	0	0	0	0	0	0	0	0	0	0	0	0	0	0	0	0	0	0	0	0	0	0	TACAGAAACAGCTGCAATCCCCATTAATGGTTCACCTCGAACACCCAGAAGAGGTCAGAACAGGAGCGCTCGGATAGCAAAACAACTAGAAAATGAT|-CGAGGATTATCGAGGTTCTCTGTAAAGAACACGAGTGTAATATAGATGAGGTAATTTCTCTTACACTTTATTTAAAACAGCTGAAGTAGATATATATGCTAAGTCTGCCTGTCA
Rb1	Del 13|0	0	0	25.2669	0	0	25.0524	0	0	0	0	0	0	0	0	0	0	0	0	0	0	0	0	0	0	0	0	TACAGAAACAGCTGCAATCCCCATTAATGGTTCACCTCGAACACCCAGAAGAGGTCAGAACAGGAGCGCTCGGATAGCAAAACA-------------|ACGAGGATTATCGAGGTTCTCTGTAAAGAACACGAGTGTAATATAGATGAGGTAATTTCTCTTACACTTTATTTAAAACAGCTGAAGTAGATATATATGCTAAGTCTGCCTGTCA
Rb1	Del 13|2	0	0	24.8484	0	0	0	0	0	0	0	0	0	0	0	0	0	0	0	0	0	0	0	0	0	0	0	TACAGAAACAGCTGCAATCCCCATTAATGGTTCACCTCGAACACCCAGAAGAGGTCAGAACAGGAGCGCTCGGATAGCAAAACA-------------|--GAGGATTATCGAGGTTCTCTGTAAAGAACACGAGTGTAATATAGATGAGGTAATTTCTCTTACACTTTATTTAAAACAGCTGAAGTAGATATATATGCTAAGTCTGCCTGTCA
Rb1	Del 7|0	0	0	0	0	0	0	15.9769	0	0	0	0	0	0	0	0	0	0	0	0	0	0	0	0	0	0	0	TACAGAAACAGCTGCAATCCCCATTAATGGTTCACCTCGAACACCCAGAAGAGGTCAGAACAGGAGCGCTCGGATAGCAAAACAACTAG-------T|ACGAGGATTATCGAGGTTCTCTGTAAAGAACACGAGTGTAATATAGATGAGGTAATTTCTCTTACACTTTATTTAAAACAGCTGAAGTAGATATATATGCTAAGTCTGCCTGTCA
Rb1	Del 1|6	0	0	0	0	0	0	14.7229	0	0	0	0	0	0	0	0	0	0	0	0	0	0	0	0	0	0	0	TACAGAAACAGCTGCAATCCCCATTAATGGTTCACCTCGAACACCCAGAAGAGGTCAGAACAGGAGCGCTCGGATAGCAAAACAACTAGAAAATGA-|------ATTATCGAGGTTCTCTGTAAAGAACACGAGTGTAATATAGATGAGGTAATTTCTCTTACACTTTATTTAAAACAGCTGAAGTAGATATATATGCTAAGTCTGCCTGTCA
Rb1	Del 11|0	0	0	0	0	0	0	0	0	31.3791	0	0	0	0	0	0	0	0	0	0	0	0	0	0	0	0	0	TACAGAAACAGCTGCAATCCCCATTAATGGTTCACCTCGAACACCCAGAAGAGGTCAGAACAGGAGCGCTCGGATAGCAAAACAA-----------T|ACGAGGATTATCGAGGTTCTCTGTAAAGAACACGAGTGTAATATAGATGAGGTAATTTCTCTTACACTTTATTTAAAACAGCTGAAGTAGATATATATGCTAAGTCTGCCTGTCA
Rb1	Del 1|0	0	0	0	0	0	0	0	0	30.2568	0	0	0	0	0	0	0	0	0	0	0	0	0	0	0	0	0	TACAGAAACAGCTGCAATCCCCATTAATGGTTCACCTCGAACACCCAGAAGAGGTCAGAACAGGAGCGCTCGGATAGCAAAACAACTAGAAAAT-AT|ACGAGGATTATCGAGGTTCTCTGTAAAGAACACGAGTGTAATATAGATGAGGTAATTTCTCTTACACTTTATTTAAAACAGCTGAAGTAGATATATATGCTAAGTCTGCCTGTCA
Rb1	Del 2|0	0	0	0	0	0	0	0	0	0	24.3152	0	0	0	0	0	0	0	0	0	0	0	0	0	0	0	0	TACAGAAACAGCTGCAATCCCCATTAATGGTTCACCTCGAACACCCAGAAGAGGTCAGAACAGGAGCGCTCGGATAGCAAAACAACTAGAAAATG--|ACGAGGATTATCGAGGTTCTCTGTAAAGAACACGAGTGTAATATAGATGAGGTAATTTCTCTTACACTTTATTTAAAACAGCTGAAGTAGATATATATGCTAAGTCTGCCTGTCA
Rb1	Del 3|0	0	0	0	0	0	0	0	0	0	0	0	0	0	17.7686	0	0	0	0	0	0	0	0	3.64674	0.231095	1.10249	1.06308	TACAGAAACAGCTGCAATCCCCATTAATGGTTCACCTCGAACACCCAGAAGAGGTCAGAACAGGAGCGCTCGGATAGCAAAACAACTAGAAAAT---|ACGAGGATTATCGAGGTTCTCTGTAAAGAACACGAGTGTAATATAGATGAGGTAATTTCTCTTACACTTTATTTAAAACAGCTGAAGTAGATATATATGCTAAGTCTGCCTGTCA
Rb1	Del 13|0	0	0	0	0	0	0	0	0	0	0	0	0	0	0	16.3008	0	0	0	0	0	0	0	0	0	0	0	TACAGAAACAGCTGCAATCCCCATTAATGGTTCACCTCGAACACCCAGAAGAGGTCAGAACAGGAGCGCTCGGATAGCAAAAC-------------T|ACGAGGATTATCGAGGTTCTCTGTAAAGAACACGAGTGTAATATAGATGAGGTAATTTCTCTTACACTTTATTTAAAACAGCTGAAGTAGATATATATGCTAAGTCTGCCTGTCA
Rb1	Del 2|1	0	0	0	0	0	0	0	0	0	0	0	0	0	0	12.1698	0	0	0	0	0	0	0	0	0	0	0	TACAGAAACAGCTGCAATCCCCATTAATGGTTCACCTCGAACACCCAGAAGAGGTCAGAACAGGAGCGCTCGGATAGCAAAACAACTAGAAAATG--|-CGAGGATTATCGAGGTTCTCTGTAAAGAACACGAGTGTAATATAGATGAGGTAATTTCTCTTACACTTTATTTAAAACAGCTGAAGTAGATATATATGCTAAGTCTGCCTGTCA
Rb1	Del 0|9	0	0	0	0	0	0	0	0	0	0	0	0	0	0	0	38.4461	0	0	0	0	0	0	0	0	0	0	TACAGAAACAGCTGCAATCCCCATTAATGGTTCACCTCGAACACCCAGAAGAGGTCAGAACAGGAGCGCTCGGATAGCAAAACAACTAGAAAATGAT|---------ATCGAGGTTCTCTGTAAAGAACACGAGTGTAATATAGATGAGGTAATTTCTCTTACACTTTATTTAAAACAGCTGAAGTAGATATATATGCTAAGTCTGCCTGTCA
Rb1	Del 6|0	0	0	0	0	0	0	0	0	0	0	0	0	0	0	0	37.4899	0	0	0	0	0	0	0	0	0	0	TACAGAAACAGCTGCAATCCCCATTAATGGTTCACCTCGAACACCCAGAAGAGGTCAGAACAGGAGCGCTCGGATAGCAAAACAACTAGAA------|ACGAGGATTATCGAGGTTCTCTGTAAAGAACACGAGTGTAATATAGATGAGGTAATTTCTCTTACACTTTATTTAAAACAGCTGAAGTAGATATATATGCTAAGTCTGCCTGTCA
Rb1	Del 16|27	0	0	0	0	0	0	0	0	0	0	0	0	0	0	0	0	0	15.9936	0	0	0	0	0	0	0	0	TACAGAAACAGCTGCAATCCCCATTAATGGTTCACCTCGAACACCCAGAAGAGGTCAGAACAGGAGCGCTCGGATAGCAAA----------------|---------------------------GAACACGAGTGTAATATAGATGAGGTAATTTCTCTTACACTTTATTTAAAACAGCTGAAGTAGATATATATGCTAAGTCTGCCTGTCA
Rb1	Del 4|0 Ins 2GT	0	0	0	0	0	0	0	0	0	0	0	0	0	0	0	0	0	0	14.1164	0	0	0	0	0	0	0	TACAGAAACAGCTGCAATCCCCATTAATGGTTCACCTCGAACACCCAGAAGAGGTCAGAACAGGAGCGCTCGGATAGCAAAACAACTAGAAAA----{GT}|ACGAGGATTATCGAGGTTCTCTGTAAAGAACACGAGTGTAATATAGATGAGGTAATTTCTCTTACACTTTATTTAAAACAGCTGAAGTAGATATATATGCTAAGTCTGCCTGTCA
Rb1	Del 9|0	0	0	0	0	0	0	0	0	0	0	0	0	0	0	0	0	0	0	0	0	14.7538	0	0	0	0	0	TACAGAAACAGCTGCAATCCCCATTAATGGTTCACCTCGAACACCCAGAAGAGGTCAGAACAGGAGCGCTCGGATAGCAAAACAACT---------T|ACGAGGATTATCGAGGTTCTCTGTAAAGAACACGAGTGTAATATAGATGAGGTAATTTCTCTTACACTTTATTTAAAACAGCTGAAGTAGATATATATGCTAAGTCTGCCTGTCA
Rps6ka3	WT	100	100	50.3804	100	100	100	70.697	100	100	100	100	100	100	100	100	100	100	100	100	100	71.4075	61.8127	100	100	100	100	GAGAGTCATTCTGGGCTAACAATGGGTTGTCTCTATATTTACCTTAACAGGAAGAAGGCAGTATCAAAGAAATTGCAATCACACATCATGTGAAGGAAGGACATG|AAAAGGCAGATCCTTCCCAGTTTGAACTTTTAAAAGTATTAGGGCAGGGATCATTTGGAAAGGTAAGTCATAGTTGTTTGC
Rps6ka3	Del 1|0	0	0	49.6196	0	0	0	0	0	0	0	0	0	0	0	0	0	0	0	0	0	0	0	0	0	0	0	GAGAGTCATTCTGGGCTAACAATGGGTTGTCTCTATATTTACCTTAACAGGAAGAAGGCAGTATCAAAGAAATTGCAATCACACATCATGTGAAGGAAGGACAT-|AAAAGGCAGATCCTTCCCAGTTTGAACTTTTAAAAGTATTAGGGCAGGGATCATTTGGAAAGGTAAGTCATAGTTGTTTGC
Rps6ka3	Del 0|2	0	0	0	0	0	0	29.303	0	0	0	0	0	0	0	0	0	0	0	0	0	0	38.1873	0	0	0	0	GAGAGTCATTCTGGGCTAACAATGGGTTGTCTCTATATTTACCTTAACAGGAAGAAGGCAGTATCAAAGAAATTGCAATCACACATCATGTGAAGGAAGGACATG|--AAGGCAGATCCTTCCCAGTTTGAACTTTTAAAAGTATTAGGGCAGGGATCATTTGGAAAGGTAAGTCATAGTTGTTTGC
Rps6ka3	Del 14|30	0	0	0	0	0	0	0	0	0	0	0	0	0	0	0	0	0	0	0	0	28.5925	0	0	0	0	0	GAGAGTCATTCTGGGCTAACAATGGGTTGTCTCTATATTTACCTTAACAGGAAGAAGGCAGTATCAAAGAAATTGCAATCACACATCATGT--------------|------------------------------TAAAAGTATTAGGGCAGGGATCATTTGGAAAGGTAAGTCATAGTTGTTTGC
Runx3	WT	50.6744	73.8768	48.6704	13.9412	84.7491	100	79.1392	75.5066	35.5664	30.0418	82.7529	66.5143	100	82.0836	70.7236	25.2269	100	100	83.4509	100	57.9611	100	87.0948	76.7668	85.3184	81.3705	GACAGCCCCAACTTCCTCTGCTCCGTGCTGCCCTCGCACTGGCGCTGCAACAAGACGCTGCCGGTCGCCT|TCAAGGTGAGTGCAGGGGCCCGAGCCGGGAGGACACCGGGGAACCTGGGCGCCCCCATTTGCAGGAGCCCATACCGGGGAGGACTTGGGGAGCACCTAGAAGTAGGACATGAAAGGGGATGTCACCCAG
Runx3	Del 16|10	43.8343	0	0	0	0	0	0	0	0	0	0	0	0	0	0	0	0	0	0	0	0	0	0	0	0	0	GACAGCCCCAACTTCCTCTGCTCCGTGCTGCCCTCGCACTGGCGCTGCAACAAG----------------|----------TGCAGGGGCCCGAGCCGGGAGGACACCGGGGAACCTGGGCGCCCCCATTTGCAGGAGCCCATACCGGGGAGGACTTGGGGAGCACCTAGAAGTAGGACATGAAAGGGGATGTCACCCAG
Runx3	Del 13|6	5.49133	0	0	0	0	0	0	0	0	0	0	0	0	0	0	0	0	0	0	0	0	0	0	0	0	0	GACAGCCCCAACTTCCTCTGCTCCGTGCTGCCCTCGCACTGGCGCTGCAACAAGACG-------------|------TGAGTGCAGGGGCCCGAGCCGGGAGGACACCGGGGAACCTGGGCGCCCCCATTTGCAGGAGCCCATACCGGGGAGGACTTGGGGAGCACCTAGAAGTAGGACATGAAAGGGGATGTCACCCAG
Runx3	Del 1|0	0	11.4851	0	0	0	0	0	0	0	0	0	0	0	0	0	0	0	0	0	0	0	0	0	0	0	0	GACAGCCCCAACTTCCTCTGCTCCGTGCTGCCCTCGCACTGGCGCTGCAACAAGACGCTGCCGGTCGC-T|TCAAGGTGAGTGCAGGGGCCCGAGCCGGGAGGACACCGGGGAACCTGGGCGCCCCCATTTGCAGGAGCCCATACCGGGGAGGACTTGGGGAGCACCTAGAAGTAGGACATGAAAGGGGATGTCACCCAG
Runx3	Del 2|0	0	7.51511	0	0	0	0	0	0	0	0	0	0	0	0	0	0	0	0	0	0	0	0	0	0	0	0	GACAGCCCCAACTTCCTCTGCTCCGTGCTGCCCTCGCACTGGCGCTGCAACAAGACGCTGCCGGTCGC--|TCAAGGTGAGTGCAGGGGCCCGAGCCGGGAGGACACCGGGGAACCTGGGCGCCCCCATTTGCAGGAGCCCATACCGGGGAGGACTTGGGGAGCACCTAGAAGTAGGACATGAAAGGGGATGTCACCCAG
Runx3	Del 2|0	0	7.12302	0	0	0	0	0	0	0	0	0	0	0	0	0	0	0	0	0	0	0	0	0	0	0	0	GACAGCCCCAACTTCCTCTGCTCCGTGCTGCCCTCGCACTGGCGCTGCAACAAGACGCTGCCGGTCG--T|TCAAGGTGAGTGCAGGGGCCCGAGCCGGGAGGACACCGGGGAACCTGGGCGCCCCCATTTGCAGGAGCCCATACCGGGGAGGACTTGGGGAGCACCTAGAAGTAGGACATGAAAGGGGATGTCACCCAG
Runx3	Del 1|0	0	0	51.3296	0	6.55644	0	0	0	32.5561	35.0015	0	0	0	17.9164	29.2764	37.5681	0	0	5.45369	0	6.95534	0	0	0	0	0	GACAGCCCCAACTTCCTCTGCTCCGTGCTGCCCTCGCACTGGCGCTGCAACAAGACGCTGCCGGTCGCC-|TCAAGGTGAGTGCAGGGGCCCGAGCCGGGAGGACACCGGGGAACCTGGGCGCCCCCATTTGCAGGAGCCCATACCGGGGAGGACTTGGGGAGCACCTAGAAGTAGGACATGAAAGGGGATGTCACCCAG
Runx3	Del 12|19	0	0	0	46.7875	0	0	0	0	0	0	0	0	0	0	0	0	0	0	0	0	0	0	0	0	0	0	GACAGCCCCAACTTCCTCTGCTCCGTGCTGCCCTCGCACTGGCGCTGCAACAAGACGC------------|-------------------CCGAGCCGGGAGGACACCGGGGAACCTGGGCGCCCCCATTTGCAGGAGCCCATACCGGGGAGGACTTGGGGAGCACCTAGAAGTAGGACATGAAAGGGGATGTCACCCAG
Runx3	Del 7|0	0	0	0	39.2713	0	0	0	12.4422	0	0	0	0	0	0	0	37.2051	0	0	0	0	0	0	0	0	0	0	GACAGCCCCAACTTCCTCTGCTCCGTGCTGCCCTCGCACTGGCGCTGCAACAAGACGCTGCCG-------|TCAAGGTGAGTGCAGGGGCCCGAGCCGGGAGGACACCGGGGAACCTGGGCGCCCCCATTTGCAGGAGCCCATACCGGGGAGGACTTGGGGAGCACCTAGAAGTAGGACATGAAAGGGGATGTCACCCAG
Runx3	Del 6|5	0	0	0	0	8.69441	0	0	0	0	0	0	0	0	0	0	0	0	0	0	0	0	0	0	0	0	0	GACAGCCCCAACTTCCTCTGCTCCGTGCTGCCCTCGCACTGGCGCTGCAACAAGACGCTGCCGG------ | -----GTGAGTGCAGGGGCCCGAGCCGGGAGGACACCGGGGAACCTGGGCGCCCCCATTTGCAGGAGCCCATACCGGGGAGGACTTGGGGAGCACCTAGAAGTAGGACATGAAAGGGGATGTCACCCAG
Runx3	Del 8|3	0	0	0	0	0	0	11.8577	0	0	0	0	0	0	0	0	0	0	0	0	0	0	0	0	0	0	0	GACAGCCCCAACTTCCTCTGCTCCGTGCTGCCCTCGCACTGGCGCTGCAACAAGACGCTGCC-------- | ---AGGTGAGTGCAGGGGCCCGAGCCGGGAGGACACCGGGGAACCTGGGCGCCCCCATTTGCAGGAGCCCATACCGGGGAGGACTTGGGGAGCACCTAGAAGTAGGACATGAAAGGGGATGTCACCCAG
Runx3	Del 3|0	0	0	0	0	0	0	9.00307	12.0512	0	0	0	0	0	0	0	0	0	0	0	0	0	0	0	0	0	0	GACAGCCCCAACTTCCTCTGCTCCGTGCTGCCCTCGCACTGGCGCTGCAACAAGACGCTGCCGGTC---T|TCAAGGTGAGTGCAGGGGCCCGAGCCGGGAGGACACCGGGGAACCTGGGCGCCCCCATTTGCAGGAGCCCATACCGGGGAGGACTTGGGGAGCACCTAGAAGTAGGACATGAAAGGGGATGTCACCCAG
Runx3	Del 1|2	0	0	0	0	0	0	0	0	31.8775	34.9567	0	33.4857	0	0	0	0	0	0	11.0954	0	0	0	0	0	0	0	GACAGCCCCAACTTCCTCTGCTCCGTGCTGCCCTCGCACTGGCGCTGCAACAAGACGCTGCCGGTCGCC-|--AAGGTGAGTGCAGGGGCCCGAGCCGGGAGGACACCGGGGAACCTGGGCGCCCCCATTTGCAGGAGCCCATACCGGGGAGGACTTGGGGAGCACCTAGAAGTAGGACATGAAAGGGGATGTCACCCAG
Runx3	Del 32|3	0	0	0	0	0	0	0	0	0	0	17.2471	0	0	0	0	0	0	0	0	0	0	0	0	0	0	0	GACAGCCCCAACTTCCTCTGCTCCGTGCTGCCCTCGCA-------------------------------- | ---AGGTGAGTGCAGGGGCCCGAGCCGGGAGGACACCGGGGAACCTGGGCGCCCCCATTTGCAGGAGCCCATACCGGGGAGGACTTGGGGAGCACCTAGAAGTAGGACATGAAAGGGGATGTCACCCAG
Runx3	Del 42|14	0	0	0	0	0	0	0	0	0	0	0	0	0	0	0	0	0	0	0	0	15.8882	0	0	0	0	0	GACAGCCCCAACTTCCTCTGCTCCGTGC------------------------------------------ | --------------GGGGCCCGAGCCGGGAGGACACCGGGGAACCTGGGCGCCCCCATTTGCAGGAGCCCATACCGGGGAGGACTTGGGGAGCACCTAGAAGTAGGACATGAAAGGGGATGTCACCCAG
Runx3	Del 9|2	0	0	0	0	0	0	0	0	0	0	0	0	0	0	0	0	0	0	0	0	9.61473	0	0	0	0	0	GACAGCCCCAACTTCCTCTGCTCCGTGCTGCCCTCGCACTGGCGCTGCAACAAGACGCTGC---------|--AAGGTGAGTGCAGGGGCCCGAGCCGGGAGGACACCGGGGAACCTGGGCGCCCCCATTTGCAGGAGCCCATACCGGGGAGGACTTGGGGAGCACCTAGAAGTAGGACATGAAAGGGGATGTCACCCAG
Runx3	Del 0|3	0	0	0	0	0	0	0	0	0	0	0	0	0	0	0	0	0	0	0	0	9.58063	0	0	0	0	0	GACAGCCCCAACTTCCTCTGCTCCGTGCTGCCCTCGCACTGGCGCTGCAACAAGACGCTGCCGGTCGCCT|---AGGTGAGTGCAGGGGCCCGAGCCGGGAGGACACCGGGGAACCTGGGCGCCCCCATTTGCAGGAGCCCATACCGGGGAGGACTTGGGGAGCACCTAGAAGTAGGACATGAAAGGGGATGTCACCCAG
Runx3	Del 6|0	0	0	0	0	0	0	0	0	0	0	0	0	0	0	0	0	0	0	0	0	0	0	12.9052	23.2332	14.6816	18.6295	GACAGCCCCAACTTCCTCTGCTCCGTGCTGCCCTCGCACTGGCGCTGCAACAAGACGCTGCCGG------|TCAAGGTGAGTGCAGGGGCCCGAGCCGGGAGGACACCGGGGAACCTGGGCGCCCCCATTTGCAGGAGCCCATACCGGGGAGGACTTGGGGAGCACCTAGAAGTAGGACATGAAAGGGGATGTCACCCAG
Setd5	WT	56.7564	52.8977	66.4702	33.1979	74.46	68.4265	79.5995	66.0097	43.5029	47.919	71.2486	36.6446	20.6361	59.4738	63.1572	50.9781	41.7714	54.3388	76.7992	61.0796	69.5409	66.2316	82.5002	90.7044	73.3139	72.7257	GCCCTGGTTTTAGTAGGTAATCGCTCAGAAGGAAAGTTTTAACTCCTGGGAAAGCCCCTTCTATGCTAATTTATTCTATCGGGCGCCTTTGCCTTTCTCATTCTTAGGAATAAGGATCTTTCTCCTGTG|TACTGATGCTGCAGCCCGCCCTGCTGGCCTGGGTCAGGGGTGCGTGGATGACCTGCATTTTCTGCTTTCTCATGTTACTTGTGTAACGTCTTCACC
Setd5	Del 12|2	21.6356	0	0	0	0	0	0	0	0	0	0	0	0	0	0	0	0	0	0	0	0	0	0	0	0	0	GCCCTGGTTTTAGTAGGTAATCGCTCAGAAGGAAAGTTTTAACTCCTGGGAAAGCCCCTTCTATGCTAATTTATTCTATCGGGCGCCTTTGCCTTTCTCATTCTTAGGAATAAGGAT------------|--CTGATGCTGCAGCCCGCCCTGCTGGCCTGGGTCAGGGGTGCGTGGATGACCTGCATTTTCTGCTTTCTCATGTTACTTGTGTAACGTCTTCACC
Setd5	Del 0|3	21.608	0	0	0	0	0	0	0	0	0	0	0	0	0	13.231	0	0	0	0	0	0	0	4.81995	2.45032	7.06725	7.21354	GCCCTGGTTTTAGTAGGTAATCGCTCAGAAGGAAAGTTTTAACTCCTGGGAAAGCCCCTTCTATGCTAATTTATTCTATCGGGCGCCTTTGCCTTTCTCATTCTTAGGAATAAGGATCTTTCTCCTGTG|---TGATGCTGCAGCCCGCCCTGCTGGCCTGGGTCAGGGGTGCGTGGATGACCTGCATTTTCTGCTTTCTCATGTTACTTGTGTAACGTCTTCACC
Setd5	Del 0|1	0	20.6007	0	34.3918	12.8309	0	0	17.5556	0	0	0	0	0	0	0	0	0	23.0815	0	0	0	33.7684	0	0	0	0	GCCCTGGTTTTAGTAGGTAATCGCTCAGAAGGAAAGTTTTAACTCCTGGGAAAGCCCCTTCTATGCTAATTTATTCTATCGGGCGCCTTTGCCTTTCTCATTCTTAGGAATAAGGATCTTTCTCCTGTG|-ACTGATGCTGCAGCCCGCCCTGCTGGCCTGGGTCAGGGGTGCGTGGATGACCTGCATTTTCTGCTTTCTCATGTTACTTGTGTAACGTCTTCACC
Setd5	Del 1|0	0	17.6014	0	0	0	0	0	0	28.0839	0	0	0	0	0	0	0	0	0	0	16.4547	0	0	0	0	0	0	GCCCTGGTTTTAGTAGGTAATCGCTCAGAAGGAAAGTTTTAACTCCTGGGAAAGCCCCTTCTATGCTAATTTATTCTATCGGGCGCCTTTGCCTTTCTCATTCTTAGGAATAAGGATCTTTCTCCTGT-|TACTGATGCTGCAGCCCGCCCTGCTGGCCTGGGTCAGGGGTGCGTGGATGACCTGCATTTTCTGCTTTCTCATGTTACTTGTGTAACGTCTTCACC
Setd5	Del 2|0	0	8.90027	0	0	10.9757	0	0	0	28.4132	0	0	0	39.9402	0	0	0	0	0	0	22.4658	15.7052	0	12.6799	6.84525	19.6189	20.0608	GCCCTGGTTTTAGTAGGTAATCGCTCAGAAGGAAAGTTTTAACTCCTGGGAAAGCCCCTTCTATGCTAATTTATTCTATCGGGCGCCTTTGCCTTTCTCATTCTTAGGAATAAGGATCTTTCTCCTG--|TACTGATGCTGCAGCCCGCCCTGCTGGCCTGGGTCAGGGGTGCGTGGATGACCTGCATTTTCTGCTTTCTCATGTTACTTGTGTAACGTCTTCACC
Setd5	Del 0|2	0	0	33.5298	0	0	0	0	0	0	0	0	0	0	20.0806	0	0	0	0	0	0	0	0	0	0	0	0	GCCCTGGTTTTAGTAGGTAATCGCTCAGAAGGAAAGTTTTAACTCCTGGGAAAGCCCCTTCTATGCTAATTTATTCTATCGGGCGCCTTTGCCTTTCTCATTCTTAGGAATAAGGATCTTTCTCCTGTG|--CTGATGCTGCAGCCCGCCCTGCTGGCCTGGGTCAGGGGTGCGTGGATGACCTGCATTTTCTGCTTTCTCATGTTACTTGTGTAACGTCTTCACC
Setd5	Del 0|5	0	0	0	32.4102	1.73333	0	0	16.4347	0	0	28.7514	31.1844	0	0	0	0	0	0	12.9807	0	0	0	0	0	0	0	GCCCTGGTTTTAGTAGGTAATCGCTCAGAAGGAAAGTTTTAACTCCTGGGAAAGCCCCTTCTATGCTAATTTATTCTATCGGGCGCCTTTGCCTTTCTCATTCTTAGGAATAAGGATCTTTCTCCTGTG|-----ATGCTGCAGCCCGCCCTGCTGGCCTGGGTCAGGGGTGCGTGGATGACCTGCATTTTCTGCTTTCTCATGTTACTTGTGTAACGTCTTCACC
Setd5	Del 18|9	0	0	0	0	0	31.5735	0	0	0	0	0	0	0	0	0	0	0	0	0	0	0	0	0	0	0	0	GCCCTGGTTTTAGTAGGTAATCGCTCAGAAGGAAAGTTTTAACTCCTGGGAAAGCCCCTTCTATGCTAATTTATTCTATCGGGCGCCTTTGCCTTTCTCATTCTTAGGAAT------------------|---------TGCAGCCCGCCCTGCTGGCCTGGGTCAGGGGTGCGTGGATGACCTGCATTTTCTGCTTTCTCATGTTACTTGTGTAACGTCTTCACC
Setd5	Del 4|6	0	0	0	0	0	0	13.864	0	0	0	0	0	0	0	0	0	0	0	0	0	0	0	0	0	0	0	GCCCTGGTTTTAGTAGGTAATCGCTCAGAAGGAAAGTTTTAACTCCTGGGAAAGCCCCTTCTATGCTAATTTATTCTATCGGGCGCCTTTGCCTTTCTCATTCTTAGGAATAAGGATCTTTCTCC----|------TGCTGCAGCCCGCCCTGCTGGCCTGGGTCAGGGGTGCGTGGATGACCTGCATTTTCTGCTTTCTCATGTTACTTGTGTAACGTCTTCACC
Setd5	Del 71|45	0	0	0	0	0	0	6.53645	0	0	0	0	0	0	0	0	0	0	0	0	0	0	0	0	0	0	0	GCCCTGGTTTTAGTAGGTAATCGCTCAGAAGGAAAGTTTTAACTCCTGGGAAAGCCCC-----------------------------------------------------------------------|---------------------------------------------GGATGACCTGCATTTTCTGCTTTCTCATGTTACTTGTGTAACGTCTTCACC
Setd5	Del 0|11	0	0	0	0	0	0	0	0	0	26.1902	0	0	0	0	0	0	0	0	0	0	0	0	0	0	0	0	GCCCTGGTTTTAGTAGGTAATCGCTCAGAAGGAAAGTTTTAACTCCTGGGAAAGCCCCTTCTATGCTAATTTATTCTATCGGGCGCCTTTGCCTTTCTCATTCTTAGGAATAAGGATCTTTCTCCTGTG|-----------CAGCCCGCCCTGCTGGCCTGGGTCAGGGGTGCGTGGATGACCTGCATTTTCTGCTTTCTCATGTTACTTGTGTAACGTCTTCACC
Setd5	Del 0|1	0	0	0	0	0	0	0	0	0	25.8908	0	0	0	0	0	0	0	0	0	0	0	0	0	0	0	0	GCCCTGGTTTTAGTAGGTAATCGCTCAGAAGGAAAGTTTTAACTCCTGGGAAAGCCCCTTCTATGCTAATTTATTCTATCGGGCGCCTTTGCCTTTCTCATTCTTAGGAATAAGGATCTTTCTCCTGTG|-ACTGATGCTGCAGCCCGCCCTGCTGGCCTGGGTCAGGGGTGCGTGGATGACCTGCATTTTCTGCTTTCTCATGTTACTTGTGTAACGTCTTCACC
Setd5	Del 0|8	0	0	0	0	0	0	0	0	0	0	0	32.171	0	20.4456	0	0	0	0	0	0	0	0	0	0	0	0	GCCCTGGTTTTAGTAGGTAATCGCTCAGAAGGAAAGTTTTAACTCCTGGGAAAGCCCCTTCTATGCTAATTTATTCTATCGGGCGCCTTTGCCTTTCTCATTCTTAGGAATAAGGATCTTTCTCCTGTG|--------CTGCAGCCCGCCCTGCTGGCCTGGGTCAGGGGTGCGTGGATGACCTGCATTTTCTGCTTTCTCATGTTACTTGTGTAACGTCTTCACC
Setd5	Del 5|2	0	0	0	0	0	0	0	0	0	0	0	0	39.4238	0	0	0	0	0	0	0	0	0	0	0	0	0	GCCCTGGTTTTAGTAGGTAATCGCTCAGAAGGAAAGTTTTAACTCCTGGGAAAGCCCCTTCTATGCTAATTTATTCTATCGGGCGCCTTTGCCTTTCTCATTCTTAGGAATAAGGATCTTTCTC-----|--CTGATGCTGCAGCCCGCCCTGCTGGCCTGGGTCAGGGGTGCGTGGATGACCTGCATTTTCTGCTTTCTCATGTTACTTGTGTAACGTCTTCACC
Setd5	Del 81|3	0	0	0	0	0	0	0	0	0	0	0	0	0	0	23.6117	0	0	0	0	0	0	0	0	0	0	0	GCCCTGGTTTTAGTAGGTAATCGCTCAGAAGGAAAGTTTTAACTCCTG---------------------------------------------------------------------------------|---TGATGCTGCAGCCCGCCCTGCTGGCCTGGGTCAGGGGTGCGTGGATGACCTGCATTTTCTGCTTTCTCATGTTACTTGTGTAACGTCTTCACC
Setd5	Del 12|11	0	0	0	0	0	0	0	0	0	0	0	0	0	0	0	49.0219	0	0	0	0	0	0	0	0	0	0	GCCCTGGTTTTAGTAGGTAATCGCTCAGAAGGAAAGTTTTAACTCCTGGGAAAGCCCCTTCTATGCTAATTTATTCTATCGGGCGCCTTTGCCTTTCTCATTCTTAGGAATAAGGAT------------|-----------CAGCCCGCCCTGCTGGCCTGGGTCAGGGGTGCGTGGATGACCTGCATTTTCTGCTTTCTCATGTTACTTGTGTAACGTCTTCACC
Setd5	Del 4|2	0	0	0	0	0	0	0	0	0	0	0	0	0	0	0	0	58.2286	0	0	0	0	0	0	0	0	0	GCCCTGGTTTTAGTAGGTAATCGCTCAGAAGGAAAGTTTTAACTCCTGGGAAAGCCCCTTCTATGCTAATTTATTCTATCGGGCGCCTTTGCCTTTCTCATTCTTAGGAATAAGGATCTTTCTCC----|--CTGATGCTGCAGCCCGCCCTGCTGGCCTGGGTCAGGGGTGCGTGGATGACCTGCATTTTCTGCTTTCTCATGTTACTTGTGTAACGTCTTCACC
Setd5	Del 0|4	0	0	0	0	0	0	0	0	0	0	0	0	0	0	0	0	0	22.5797	0	0	0	0	0	0	0	0	GCCCTGGTTTTAGTAGGTAATCGCTCAGAAGGAAAGTTTTAACTCCTGGGAAAGCCCCTTCTATGCTAATTTATTCTATCGGGCGCCTTTGCCTTTCTCATTCTTAGGAATAAGGATCTTTCTCCTGTG|----GATGCTGCAGCCCGCCCTGCTGGCCTGGGTCAGGGGTGCGTGGATGACCTGCATTTTCTGCTTTCTCATGTTACTTGTGTAACGTCTTCACC
Setd5	Del 8|8	0	0	0	0	0	0	0	0	0	0	0	0	0	0	0	0	0	0	10.22	0	0	0	0	0	0	0	GCCCTGGTTTTAGTAGGTAATCGCTCAGAAGGAAAGTTTTAACTCCTGGGAAAGCCCCTTCTATGCTAATTTATTCTATCGGGCGCCTTTGCCTTTCTCATTCTTAGGAATAAGGATCTTT--------|--------CTGCAGCCCGCCCTGCTGGCCTGGGTCAGGGGTGCGTGGATGACCTGCATTTTCTGCTTTCTCATGTTACTTGTGTAACGTCTTCACC
Setd5	Del 2|7	0	0	0	0	0	0	0	0	0	0	0	0	0	0	0	0	0	0	0	0	14.7539	0	0	0	0	0	GCCCTGGTTTTAGTAGGTAATCGCTCAGAAGGAAAGTTTTAACTCCTGGGAAAGCCCCTTCTATGCTAATTTATTCTATCGGGCGCCTTTGCCTTTCTCATTCTTAGGAATAAGGATCTTTCTCCTG--|-------GCTGCAGCCCGCCCTGCTGGCCTGGGTCAGGGGTGCGTGGATGACCTGCATTTTCTGCTTTCTCATGTTACTTGTGTAACGTCTTCACC
Smad4	WT	18.6224	60.1346	60.017	26.3441	76.3855	47.3235	80.0913	42.3097	40.1589	48.6139	81.9831	92.0035	93.7987	57.6087	64.1773	25.3528	23.5502	100	70.8772	53.5313	62.7296	100	48.6929	57.8451	46.7647	48.6799	AGTACGTTCACGACTTTGAAGGACAGCCGTCCTTACCCACTGAAGGACATTCGATTCAAACCATCCAACACCCGCCAAGTAATCGCGCATCAACGGAGACGTACAGCG|CCCCGGCTCTGTTAGCCCCGGCAGAGTCTAACGCCACCAGCACCACCAACTTCCCCAACATTCCTGTGGCTTCCACAAGTGAGTGTTGCAGTCAGATCGAGTCGAAAGTTTTC
Smad4	Del 2|0	72.8597	23.4216	0	0	11.5472	0	19.9087	42.1218	0	24.2597	18.0169	7.9965	6.20134	17.5212	4.94319	38.9909	0	0	14.4987	0	5.65954	0	18.7405	10.4166	14.4295	20.3588	AGTACGTTCACGACTTTGAAGGACAGCCGTCCTTACCCACTGAAGGACATTCGATTCAAACCATCCAACACCCGCCAAGTAATCGCGCATCAACGGAGACGTACAG--|CCCCGGCTCTGTTAGCCCCGGCAGAGTCTAACGCCACCAGCACCACCAACTTCCCCAACATTCCTGTGGCTTCCACAAGTGAGTGTTGCAGTCAGATCGAGTCGAAAGTTTTC
Smad4	Del 20|18	8.5179	0	0	0	0	0	0	0	0	0	0	0	0	0	0	0	0	0	0	0	0	0	0	0	0	0	AGTACGTTCACGACTTTGAAGGACAGCCGTCCTTACCCACTGAAGGACATTCGATTCAAACCATCCAACACCCGCCAAGTAATCGCGC--------------------|------------------CGGCAGAGTCTAACGCCACCAGCACCACCAACTTCCCCAACATTCCTGTGGCTTCCACAAGTGAGTGTTGCAGTCAGATCGAGTCGAAAGTTTTC
Smad4	Del 22|34	0	16.4438	0	0	0	0	0	0	0	0	0	0	0	0	0	0	0	0	0	0	0	0	0	0	0	0	AGTACGTTCACGACTTTGAAGGACAGCCGTCCTTACCCACTGAAGGACATTCGATTCAAACCATCCAACACCCGCCAAGTAATCGC----------------------|----------------------------------CACCAGCACCACCAACTTCCCCAACATTCCTGTGGCTTCCACAAGTGAGTGTTGCAGTCAGATCGAGTCGAAAGTTTTC
Smad4	Del 38|0	0	0	39.983	0	0	0	0	0	0	0	0	0	0	0	0	0	0	0	0	0	0	0	0	0	0	0	AGTACGTTCACGACTTTGAAGGACAGCCGTCCTTACCCACTGAAGGACATTCGATTCAAACCATCCAACA--------------------------------------|CCCCGGCTCTGTTAGCCCCGGCAGAGTCTAACGCCACCAGCACCACCAACTTCCCCAACATTCCTGTGGCTTCCACAAGTGAGTGTTGCAGTCAGATCGAGTCGAAAGTTTTC
Smad4	Del 0|3	0	0	0	39.7459	0	0	0	8.59883	0	0	0	0	0	0	0	0	0	0	0	0	0	0	0	0	0	0	AGTACGTTCACGACTTTGAAGGACAGCCGTCCTTACCCACTGAAGGACATTCGATTCAAACCATCCAACACCCGCCAAGTAATCGCGCATCAACGGAGACGTACAGCG|---CGGCTCTGTTAGCCCCGGCAGAGTCTAACGCCACCAGCACCACCAACTTCCCCAACATTCCTGTGGCTTCCACAAGTGAGTGTTGCAGTCAGATCGAGTCGAAAGTTTTC
Smad4	Del 4|0	0	0	0	33.91	0	0	0	0	0	0	0	0	0	0	0	0	0	0	0	18.4695	0	0	0	0	0	0	AGTACGTTCACGACTTTGAAGGACAGCCGTCCTTACCCACTGAAGGACATTCGATTCAAACCATCCAACACCCGCCAAGTAATCGCGCATCAACGGAGACGTAC----|CCCCGGCTCTGTTAGCCCCGGCAGAGTCTAACGCCACCAGCACCACCAACTTCCCCAACATTCCTGTGGCTTCCACAAGTGAGTGTTGCAGTCAGATCGAGTCGAAAGTTTTC
Smad4	Del 4|3	0	0	0	0	12.0674	0	0	0	0	0	0	0	0	0	0	0	0	0	0	0	0	0	0	0	0	0	AGTACGTTCACGACTTTGAAGGACAGCCGTCCTTACCCACTGAAGGACATTCGATTCAAACCATCCAACACCCGCCAAGTAATCGCGCATCAACGGAGACGTAC----|---CGGCTCTGTTAGCCCCGGCAGAGTCTAACGCCACCAGCACCACCAACTTCCCCAACATTCCTGTGGCTTCCACAAGTGAGTGTTGCAGTCAGATCGAGTCGAAAGTTTTC
Smad4	Del 5|0 Ins 1A	0	0	0	0	0	27.5371	0	0	0	0	0	0	0	0	0	0	0	0	0	0	0	0	0	0	0	0	AGTACGTTCACGACTTTGAAGGACAGCCGTCCTTACCCACTGAAGGACATTCGATTCAAACCATCCAACACCCGCCAAGTAATCGCGCATCAACGGAGACGTA-----{A}|CCCCGGCTCTGTTAGCCCCGGCAGAGTCTAACGCCACCAGCACCACCAACTTCCCCAACATTCCTGTGGCTTCCACAAGTGAGTGTTGCAGTCAGATCGAGTCGAAAGTTTTC
Smad4	Del 5|0 (D6 I1G)	0	0	0	0	0	25.1393	0	0	0	0	0	0	0	0	0	0	0	0	0	0	0	0	0	0	0	0	AGTACGTTCACGACTTTGAAGGACAGCCGTCCTTACCCACTGAAGGACATTCGATTCAAACCATCCAACACCCGCCAAGTAATCGCGCATCAACGGAGACGT-----G|CCCCGGCTCTGTTAGCCCCGGCAGAGTCTAACGCCACCAGCACCACCAACTTCCCCAACATTCCTGTGGCTTCCACAAGTGAGTGTTGCAGTCAGATCGAGTCGAAAGTTTTC
Smad4	Del 5|0	0	0	0	0	0	0	0	6.96968	0	0	0	0	0	0	16.2248	35.6563	0	0	0	0	16.0946	0	0	0	0	0	AGTACGTTCACGACTTTGAAGGACAGCCGTCCTTACCCACTGAAGGACATTCGATTCAAACCATCCAACACCCGCCAAGTAATCGCGCATCAACGGAGACGTA-----|CCCCGGCTCTGTTAGCCCCGGCAGAGTCTAACGCCACCAGCACCACCAACTTCCCCAACATTCCTGTGGCTTCCACAAGTGAGTGTTGCAGTCAGATCGAGTCGAAAGTTTTC
Smad4	Del 1|0	0	0	0	0	0	0	0	0	33.3602	27.1264	0	0	0	0	14.6548	0	0	0	0	0	0	0	10.9028	11.2332	13.7158	10.842	AGTACGTTCACGACTTTGAAGGACAGCCGTCCTTACCCACTGAAGGACATTCGATTCAAACCATCCAACACCCGCCAAGTAATCGCGCATCAACGGAGACGTACAGC-|CCCCGGCTCTGTTAGCCCCGGCAGAGTCTAACGCCACCAGCACCACCAACTTCCCCAACATTCCTGTGGCTTCCACAAGTGAGTGTTGCAGTCAGATCGAGTCGAAAGTTTTC
Smad4	Del 6|1	0	0	0	0	0	0	0	0	26.481	0	0	0	0	0	0	0	0	0	0	0	0	0	0	0	0	0	AGTACGTTCACGACTTTGAAGGACAGCCGTCCTTACCCACTGAAGGACATTCGATTCAAACCATCCAACACCCGCCAAGTAATCGCGCATCAACGGAGACGT------|-CCCGGCTCTGTTAGCCCCGGCAGAGTCTAACGCCACCAGCACCACCAACTTCCCCAACATTCCTGTGGCTTCCACAAGTGAGTGTTGCAGTCAGATCGAGTCGAAAGTTTTC
Smad4	Del 1|7	0	0	0	0	0	0	0	0	0	0	0	0	0	18.0613	0	0	0	0	0	0	0	0	0	0	0	0	AGTACGTTCACGACTTTGAAGGACAGCCGTCCTTACCCACTGAAGGACATTCGATTCAAACCATCCAACACCCGCCAAGTAATCGCGCATCAACGGAGACGTACAGC-|-------TCTGTTAGCCCCGGCAGAGTCTAACGCCACCAGCACCACCAACTTCCCCAACATTCCTGTGGCTTCCACAAGTGAGTGTTGCAGTCAGATCGAGTCGAAAGTTTTC
Smad4	Del 0|1	0	0	0	0	0	0	0	0	0	0	0	0	0	6.80886	0	0	0	0	0	0	0	0	0	0	0	0	AGTACGTTCACGACTTTGAAGGACAGCCGTCCTTACCCACTGAAGGACATTCGATTCAAACCATCCAACACCCGCCAAGTAATCGCGCATCAACGGAGACGTACAGCG|-CCCGGCTCTGTTAGCCCCGGCAGAGTCTAACGCCACCAGCACCACCAACTTCCCCAACATTCCTGTGGCTTCCACAAGTGAGTGTTGCAGTCAGATCGAGTCGAAAGTTTTC
Smad4	Del 3|76	0	0	0	0	0	0	0	0	0	0	0	0	0	0	0	0	42.032	0	0	0	0	0	0	0	0	0	AGTACGTTCACGACTTTGAAGGACAGCCGTCCTTACCCACTGAAGGACATTCGATTCAAACCATCCAACACCCGCCAAGTAATCGCGCATCAACGGAGACGTACA---|----------------------------------------------------------------------------AAGTGAGTGTTGCAGTCAGATCGAGTCGAAAGTTTTC
Smad4	Del 0|5	0	0	0	0	0	0	0	0	0	0	0	0	0	0	0	0	34.4178	0	0	0	0	0	0	0	0	0	AGTACGTTCACGACTTTGAAGGACAGCCGTCCTTACCCACTGAAGGACATTCGATTCAAACCATCCAACACCCGCCAAGTAATCGCGCATCAACGGAGACGTACAGCG|-----GCTCTGTTAGCCCCGGCAGAGTCTAACGCCACCAGCACCACCAACTTCCCCAACATTCCTGTGGCTTCCACAAGTGAGTGTTGCAGTCAGATCGAGTCGAAAGTTTTC
Smad4	Del 9|0	0	0	0	0	0	0	0	0	0	0	0	0	0	0	0	0	0	0	14.624	0	0	0	0	0	0	0	AGTACGTTCACGACTTTGAAGGACAGCCGTCCTTACCCACTGAAGGACATTCGATTCAAACCATCCAACACCCGCCAAGTAATCGCGCATCAACGGAGA---------|CCCCGGCTCTGTTAGCCCCGGCAGAGTCTAACGCCACCAGCACCACCAACTTCCCCAACATTCCTGTGGCTTCCACAAGTGAGTGTTGCAGTCAGATCGAGTCGAAAGTTTTC
Smad4	Del 0|2	0	0	0	0	0	0	0	0	0	0	0	0	0	0	0	0	0	0	0	18.8422	0	0	0	0	0	0	AGTACGTTCACGACTTTGAAGGACAGCCGTCCTTACCCACTGAAGGACATTCGATTCAAACCATCCAACACCCGCCAAGTAATCGCGCATCAACGGAGACGTACAGCG|--CCGGCTCTGTTAGCCCCGGCAGAGTCTAACGCCACCAGCACCACCAACTTCCCCAACATTCCTGTGGCTTCCACAAGTGAGTGTTGCAGTCAGATCGAGTCGAAAGTTTTC
Smad4	Del 20|34	0	0	0	0	0	0	0	0	0	0	0	0	0	0	0	0	0	0	0	9.15703	0	0	0	0	0	0	AGTACGTTCACGACTTTGAAGGACAGCCGTCCTTACCCACTGAAGGACATTCGATTCAAACCATCCAACACCCGCCAAGTAATCGCGC--------------------|----------------------------------CACCAGCACCACCAACTTCCCCAACATTCCTGTGGCTTCCACAAGTGAGTGTTGCAGTCAGATCGAGTCGAAAGTTTTC
Smad4	Del 25|0	0	0	0	0	0	0	0	0	0	0	0	0	0	0	0	0	0	0	0	0	15.5162	0	0	0	0	0	AGTACGTTCACGACTTTGAAGGACAGCCGTCCTTACCCACTGAAGGACATTCGATTCAAACCATCCAACACCCGCCAAGTAAT-------------------------|CCCCGGCTCTGTTAGCCCCGGCAGAGTCTAACGCCACCAGCACCACCAACTTCCCCAACATTCCTGTGGCTTCCACAAGTGAGTGTTGCAGTCAGATCGAGTCGAAAGTTTTC
Smad4	Del 3|0	0	0	0	0	0	0	0	0	0	0	0	0	0	0	0	0	0	0	0	0	0	0	10.8716	9.46271	11.9118	9.21188	AGTACGTTCACGACTTTGAAGGACAGCCGTCCTTACCCACTGAAGGACATTCGATTCAAACCATCCAACACCCGCCAAGTAATCGCGCATCAACGGAGACGTACA---|CCCCGGCTCTGTTAGCCCCGGCAGAGTCTAACGCCACCAGCACCACCAACTTCCCCAACATTCCTGTGGCTTCCACAAGTGAGTGTTGCAGTCAGATCGAGTCGAAAGTTTTC
Smad4	Ins 1 C	0	0	0	0	0	0	0	0	0	0	0	0	0	0	0	0	0	0	0	0	0	0	10.7922	11.0424	13.1782	10.9074	AGTACGTTCACGACTTTGAAGGACAGCCGTCCTTACCCACTGAAGGACATTCGATTCAAACCATCCAACACCCGCCAAGTAATCGCGCATCAACGGAGACGTACAGCG{C}|CCCCGGCTCTGTTAGCCCCGGCAGAGTCTAACGCCACCAGCACCACCAACTTCCCCAACATTCCTGTGGCTTCCACAAGTGAGTGTTGCAGTCAGATCGAGTCGAAAGTTTTC
Tet2	WT	34.6804	65.6451	72.0966	32.831	80.1043	59.73	80.0913	66.5286	44.4225	50.9525	76.8452	36.1521	14.1504	62.4738	80.3204	32.0311	37.9523	100	84.5686	100	74.2466	100	98.1916	98.1649	94.35	96.6235	CACCGTCACAATCACTTCTTGCTCCCCGTCTTGTTCTTCAGCCTCCTTTAGAAGGAAAAGGCGCTCTAAATGATGTAGCTTTGGAAGAACACCATGACTACCCCAAC|CGAAGCAACCGAACTCTTTTAAGGGAAGGGAAAATAGACCATCAACCCAAGACATCATCTAGCCAGAGTCTGAATCCATCTGTACATACACCCAACCCCCCCTTGATGCTTCCAGAACAGCAT
Tet2	Del 1|0	65.3196	17.8497	0	41.2933	10.8258	0	11.5079	33.4714	33.7145	26.0124	17.1664	0	43.5712	37.5262	19.6796	0	0	0	0	0	25.7534	0	1.29428	1.49235	2.14489	1.38625	CACCGTCACAATCACTTCTTGCTCCCCGTCTTGTTCTTCAGCCTCCTTTAGAAGGAAAAGGCGCTCTAAATGATGTAGCTTTGGAAGAACACCATGACTACCCCAA-|CGAAGCAACCGAACTCTTTTAAGGGAAGGGAAAATAGACCATCAACCCAAGACATCATCTAGCCAGAGTCTGAATCCATCTGTACATACACCCAACCCCCCCTTGATGCTTCCAGAACAGCAT
Tet2	Del 0|2	0	16.5052	0	0	0	0	0	0	0	0	0	0	0	0	0	0	0	0	0	0	0	0	0	0	0	0	CACCGTCACAATCACTTCTTGCTCCCCGTCTTGTTCTTCAGCCTCCTTTAGAAGGAAAAGGCGCTCTAAATGATGTAGCTTTGGAAGAACACCATGACTACCCCAAC|--AAGCAACCGAACTCTTTTAAGGGAAGGGAAAATAGACCATCAACCCAAGACATCATCTAGCCAGAGTCTGAATCCATCTGTACATACACCCAACCCCCCCTTGATGCTTCCAGAACAGCAT
Tet2	Del 0|6	0	0	19.8307	0	0	0	0	0	0	0	0	0	0	0	0	0	0	0	0	0	0	0	0.514166	0.342781	3.5051	1.99028	CACCGTCACAATCACTTCTTGCTCCCCGTCTTGTTCTTCAGCCTCCTTTAGAAGGAAAAGGCGCTCTAAATGATGTAGCTTTGGAAGAACACCATGACTACCCCAAC|------AACCGAACTCTTTTAAGGGAAGGGAAAATAGACCATCAACCCAAGACATCATCTAGCCAGAGTCTGAATCCATCTGTACATACACCCAACCCCCCCTTGATGCTTCCAGAACAGCAT
Tet2	Del 13|49	0	0	8.07264	0	0	0	0	0	0	0	0	0	0	0	0	0	0	0	0	0	0	0	0	0	0	0	CACCGTCACAATCACTTCTTGCTCCCCGTCTTGTTCTTCAGCCTCCTTTAGAAGGAAAAGGCGCTCTAAATGATGTAGCTTTGGAAGAACACCA-------------|-------------------------------------------------AGACATCATCTAGCCAGAGTCTGAATCCATCTGTACATACACCCAACCCCCCCTTGATGCTTCCAGAACAGCAT
Tet2	Del 2|4	0	0	0	25.8757	0	0	0	0	0	0	0	0	0	0	0	0	0	0	0	0	0	0	0	0	0	0	CACCGTCACAATCACTTCTTGCTCCCCGTCTTGTTCTTCAGCCTCCTTTAGAAGGAAAAGGCGCTCTAAATGATGTAGCTTTGGAAGAACACCATGACTACCCCA--|----GCAACCGAACTCTTTTAAGGGAAGGGAAAATAGACCATCAACCCAAGACATCATCTAGCCAGAGTCTGAATCCATCTGTACATACACCCAACCCCCCCTTGATGCTTCCAGAACAGCAT
Tet2	Del 0|5	0	0	0	0	9.06996	0	0	0	0	0	0	0	0	0	0	33.0327	0	0	0	0	0	0	0	0	0	0	CACCGTCACAATCACTTCTTGCTCCCCGTCTTGTTCTTCAGCCTCCTTTAGAAGGAAAAGGCGCTCTAAATGATGTAGCTTTGGAAGAACACCATGACTACCCCAAC|-----CAACCGAACTCTTTTAAGGGAAGGGAAAATAGACCATCAACCCAAGACATCATCTAGCCAGAGTCTGAATCCATCTGTACATACACCCAACCCCCCCTTGATGCTTCCAGAACAGCAT
Tet2	Del 5|4	0	0	0	0	0	24.279	0	0	0	0	0	0	0	0	0	0	0	0	0	0	0	0	0	0	0	0	CACCGTCACAATCACTTCTTGCTCCCCGTCTTGTTCTTCAGCCTCCTTTAGAAGGAAAAGGCGCTCTAAATGATGTAGCTTTGGAAGAACACCATGACTACC-----|----GCAACCGAACTCTTTTAAGGGAAGGGAAAATAGACCATCAACCCAAGACATCATCTAGCCAGAGTCTGAATCCATCTGTACATACACCCAACCCCCCCTTGATGCTTCCAGAACAGCAT
Tet2	Del 2|22	0	0	0	0	0	15.991	0	0	0	0	0	0	0	0	0	0	0	0	0	0	0	0	0	0	0	0	CACCGTCACAATCACTTCTTGCTCCCCGTCTTGTTCTTCAGCCTCCTTTAGAAGGAAAAGGCGCTCTAAATGATGTAGCTTTGGAAGAACACCATGACTACCCCA--|----------------------GGGAAGGGAAAATAGACCATCAACCCAAGACATCATCTAGCCAGAGTCTGAATCCATCTGTACATACACCCAACCCCCCCTTGATGCTTCCAGAACAGCAT
Tet2	Del 0|10	0	0	0	0	0	0	8.40084	0	0	0	0	0	0	0	0	0	0	0	0	0	0	0	0	0	0	0	CACCGTCACAATCACTTCTTGCTCCCCGTCTTGTTCTTCAGCCTCCTTTAGAAGGAAAAGGCGCTCTAAATGATGTAGCTTTGGAAGAACACCATGACTACCCCAAC|----------GAACTCTTTTAAGGGAAGGGAAAATAGACCATCAACCCAAGACATCATCTAGCCAGAGTCTGAATCCATCTGTACATACACCCAACCCCCCCTTGATGCTTCCAGAACAGCAT
Tet2	Del 0|12	0	0	0	0	0	0	0	0	21.863	0	0	0	0	0	0	0	0	0	0	0	0	0	0	0	0	0	CACCGTCACAATCACTTCTTGCTCCCCGTCTTGTTCTTCAGCCTCCTTTAGAAGGAAAAGGCGCTCTAAATGATGTAGCTTTGGAAGAACACCATGACTACCCCAAC|------------ACTCTTTTAAGGGAAGGGAAAATAGACCATCAACCCAAGACATCATCTAGCCAGAGTCTGAATCCATCTGTACATACACCCAACCCCCCCTTGATGCTTCCAGAACAGCAT
Tet2	Del 4|0	0	0	0	0	0	0	0	0	0	23.0351	0	32.736	0	0	0	0	0	0	0	0	0	0	0	0	0	0	CACCGTCACAATCACTTCTTGCTCCCCGTCTTGTTCTTCAGCCTCCTTTAGAAGGAAAAGGCGCTCTAAATGATGTAGCTTTGGAAGAACACCATGACTACCC----|CGAAGCAACCGAACTCTTTTAAGGGAAGGGAAAATAGACCATCAACCCAAGACATCATCTAGCCAGAGTCTGAATCCATCTGTACATACACCCAACCCCCCCTTGATGCTTCCAGAACAGCAT
Tet2	Del 44|30	0	0	0	0	0	0	0	0	0	0	5.9884	0	0	0	0	0	0	0	0	0	0	0	0	0	0	0	CACCGTCACAATCACTTCTTGCTCCCCGTCTTGTTCTTCAGCCTCCTTTAGAAGGAAAAGGCG--------------------------------------------|------------------------------AAAATAGACCATCAACCCAAGACATCATCTAGCCAGAGTCTGAATCCATCTGTACATACACCCAACCCCCCCTTGATGCTTCCAGAACAGCAT
Tet2	Del 0|9	0	0	0	0	0	0	0	0	0	0	0	31.1119	0	0	0	0	62.0477	0	0	0	0	0	0	0	0	0	CACCGTCACAATCACTTCTTGCTCCCCGTCTTGTTCTTCAGCCTCCTTTAGAAGGAAAAGGCGCTCTAAATGATGTAGCTTTGGAAGAACACCATGACTACCCCAAC|---------CGAACTCTTTTAAGGGAAGGGAAAATAGACCATCAACCCAAGACATCATCTAGCCAGAGTCTGAATCCATCTGTACATACACCCAACCCCCCCTTGATGCTTCCAGAACAGCAT
Tet2	Del 2|0	0	0	0	0	0	0	0	0	0	0	0	0	42.2785	0	0	0	0	0	0	0	0	0	0	0	0	0	CACCGTCACAATCACTTCTTGCTCCCCGTCTTGTTCTTCAGCCTCCTTTAGAAGGAAAAGGCGCTCTAAATGATGTAGCTTTGGAAGAACACCATGACTACCCCA--|CGAAGCAACCGAACTCTTTTAAGGGAAGGGAAAATAGACCATCAACCCAAGACATCATCTAGCCAGAGTCTGAATCCATCTGTACATACACCCAACCCCCCCTTGATGCTTCCAGAACAGCAT
Tet2	Del 5|0	0	0	0	0	0	0	0	0	0	0	0	0	0	0	0	34.9362	0	0	0	0	0	0	0	0	0	0	CACCGTCACAATCACTTCTTGCTCCCCGTCTTGTTCTTCAGCCTCCTTTAGAAGGAAAAGGCGCTCTAAATGATGTAGCTTTGGAAGAACACCATGACTACC-----|CGAAGCAACCGAACTCTTTTAAGGGAAGGGAAAATAGACCATCAACCCAAGACATCATCTAGCCAGAGTCTGAATCCATCTGTACATACACCCAACCCCCCCTTGATGCTTCCAGAACAGCAT
Tet2	Del 0|4	0	0	0	0	0	0	0	0	0	0	0	0	0	0	0	0	0	0	10.5223	0	0	0	0	0	0	0	CACCGTCACAATCACTTCTTGCTCCCCGTCTTGTTCTTCAGCCTCCTTTAGAAGGAAAAGGCGCTCTAAATGATGTAGCTTTGGAAGAACACCATGACTACCCCAAC|----GCAACCGAACTCTTTTAAGGGAAGGGAAAATAGACCATCAACCCAAGACATCATCTAGCCAGAGTCTGAATCCATCTGTACATACACCCAACCCCCCCTTGATGCTTCCAGAACAGCAT
Tet2	Del 1|22	0	0	0	0	0	0	0	0	0	0	0	0	0	0	0	0	0	0	4.9091	0	0	0	0	0	0	0	CACCGTCACAATCACTTCTTGCTCCCCGTCTTGTTCTTCAGCCTCCTTTAGAAGGAAAAGGCGCTCTAAATGATGTAGCTTTGGAAGAACACCATGACTACCCCAA-|----------------------GGGAAGGGAAAATAGACCATCAACCCAAGACATCATCTAGCCAGAGTCTGAATCCATCTGTACATACACCCAACCCCCCCTTGATGCTTCCAGAACAGCAT
Tsc1	WT	30.705	88.3957	74.733	24.0737	88.8502	46.8458	68.7651	85.1697	39.3662	48.549	100	62.1377	100	100	70.0592	30.3841	100	84.1413	70.835	65.1829	69.6008	100	94.2048	97.7254	86.2995	92.7492	TACTCTGCGACACAGAACATGCCCAGCATTTTCACTGTGCTTCCATTTCAGGAAGAAAGAGCAGATTCCTCAAGGCCTTACCTTCACAGACAGTCAAACGACCGAGG|ATTAGGTAAACTCCCTGGGTAATGATGGGCCTTGCTTGCCTCTTGGCATTGAACTCTGTAGCTTAAAAGCTAAGCTGGGTGGAAGAAGGATTTTCTGGGATAGCACCTATGCT
Tsc1	Del 10|10	53.9725	0	0	0	0	0	0	0	0	0	0	0	0	0	0	0	0	0	0	0	0	0	0	0	0	0	TACTCTGCGACACAGAACATGCCCAGCATTTTCACTGTGCTTCCATTTCAGGAAGAAAGAGCAGATTCCTCAAGGCCTTACCTTCACAGACAGTCAA----------|----------CTCCCTGGGTAATGATGGGCCTTGCTTGCCTCTTGGCATTGAACTCTGTAGCTTAAAAGCTAAGCTGGGTGGAAGAAGGATTTTCTGGGATAGCACCTATGCT
Tsc1	Del 1|0	8.14673	3.42683	25.267	0	0	0	16.1315	0	33.6216	51.451	0	37.8623	0	0	15.8836	0	0	15.8587	29.165	0	0	0	2.75311	1.25263	7.00899	3.90861	TACTCTGCGACACAGAACATGCCCAGCATTTTCACTGTGCTTCCATTTCAGGAAGAAAGAGCAGATTCCTCAAGGCCTTACCTTCACAGACAGTCAAACGACCGAG-|ATTAGGTAAACTCCCTGGGTAATGATGGGCCTTGCTTGCCTCTTGGCATTGAACTCTGTAGCTTAAAAGCTAAGCTGGGTGGAAGAAGGATTTTCTGGGATAGCACCTATGCT
Tsc1	Del 2|2	7.17578	0	0	0	0	0	0	0	0	0	0	0	0	0	0	0	0	0	0	0	0	0	0	0	0	0	TACTCTGCGACACAGAACATGCCCAGCATTTTCACTGTGCTTCCATTTCAGGAAGAAAGAGCAGATTCCTCAAGGCCTTACCTTCACAGACAGTCAAACGACCGA--|--TAGGTAAACTCCCTGGGTAATGATGGGCCTTGCTTGCCTCTTGGCATTGAACTCTGTAGCTTAAAAGCTAAGCTGGGTGGAAGAAGGATTTTCTGGGATAGCACCTATGCT
Tsc1	Del 0|5	0	8.17742	0	0	0	0	0	0	0	0	0	0	0	0	0	0	0	0	0	0	0	0	0	0	0	0	TACTCTGCGACACAGAACATGCCCAGCATTTTCACTGTGCTTCCATTTCAGGAAGAAAGAGCAGATTCCTCAAGGCCTTACCTTCACAGACAGTCAAACGACCGAGG|-----GTAAACTCCCTGGGTAATGATGGGCCTTGCTTGCCTCTTGGCATTGAACTCTGTAGCTTAAAAGCTAAGCTGGGTGGAAGAAGGATTTTCTGGGATAGCACCTATGCT
Tsc1	Del 7|17	0	0	0	40.0542	0	0	0	0	0	0	0	0	0	0	0	0	0	0	0	0	0	0	0	0	0	0	TACTCTGCGACACAGAACATGCCCAGCATTTTCACTGTGCTTCCATTTCAGGAAGAAAGAGCAGATTCCTCAAGGCCTTACCTTCACAGACAGTCAAACG-------|--------------------GGTAATGATGGGCCTTGCTTGCCTCTTGGCATTGAACTCTGTAGCTTAAAAGCTAAGCTGGGTGGAAGAAGGATTTTCTGGGATAGCACCTATGCT
Tsc1	Del 0|27	0	0	0	35.8721	0	0	0	0	0	0	0	0	0	0	0	0	0	0	0	0	0	0	0	0	0	0	TACTCTGCGACACAGAACATGCCCAGCATTTTCACTGTGCTTCCATTTCAGGAAGAAAGAGCAGATTCCTCAAGGCCTTACCTTCACAGACAGTCAAACGACCGAGG|---------------------------GGCCTTGCTTGCCTCTTGGCATTGAACTCTGTAGCTTAAAAGCTAAGCTGGGTGGAAGAAGGATTTTCTGGGATAGCACCTATGCT
Tsc1	Del 0|6	0	0	0	0	11.1498	0	0	14.8303	27.0122	0	0	0	0	0	0	0	0	0	0	0	14.0937	0	0	0	0	0	TACTCTGCGACACAGAACATGCCCAGCATTTTCACTGTGCTTCCATTTCAGGAAGAAAGAGCAGATTCCTCAAGGCCTTACCTTCACAGACAGTCAAACGACCGAGG|------TAAACTCCCTGGGTAATGATGGGCCTTGCTTGCCTCTTGGCATTGAACTCTGTAGCTTAAAAGCTAAGCTGGGTGGAAGAAGGATTTTCTGGGATAGCACCTATGCT
Tsc1	Del 3|18	0	0	0	0	0	27.4831	0	0	0	0	0	0	0	0	0	0	0	0	0	0	0	0	0	0	0	0	TACTCTGCGACACAGAACATGCCCAGCATTTTCACTGTGCTTCCATTTCAGGAAGAAAGAGCAGATTCCTCAAGGCCTTACCTTCACAGACAGTCAAACGACCG---|------------------GTAATGATGGGCCTTGCTTGCCTCTTGGCATTGAACTCTGTAGCTTAAAAGCTAAGCTGGGTGGAAGAAGGATTTTCTGGGATAGCACCTATGCT
Tsc1	Del 10|4	0	0	0	0	0	25.6711	0	0	0	0	0	0	0	0	0	0	0	0	0	0	0	0	0	0	0	0	TACTCTGCGACACAGAACATGCCCAGCATTTTCACTGTGCTTCCATTTCAGGAAGAAAGAGCAGATTCCTCAAGGCCTTACCTTCACAGACAGTCAA----------|----GGTAAACTCCCTGGGTAATGATGGGCCTTGCTTGCCTCTTGGCATTGAACTCTGTAGCTTAAAAGCTAAGCTGGGTGGAAGAAGGATTTTCTGGGATAGCACCTATGCT
Tsc1	Del 3|0	0	0	0	0	0	0	15.1033	0	0	0	0	0	0	0	0	0	0	0	0	13.235	0	0	0	0	0	0	TACTCTGCGACACAGAACATGCCCAGCATTTTCACTGTGCTTCCATTTCAGGAAGAAAGAGCAGATTCCTCAAGGCCTTACCTTCACAGACAGTCAAACGACCG---|ATTAGGTAAACTCCCTGGGTAATGATGGGCCTTGCTTGCCTCTTGGCATTGAACTCTGTAGCTTAAAAGCTAAGCTGGGTGGAAGAAGGATTTTCTGGGATAGCACCTATGCT
Tsc1	Del 0|1	0	0	0	0	0	0	0	0	0	0	0	0	0	0	14.0573	0	0	0	0	7.27428	0	0	3.04208	1.02196	6.69155	3.34222	TACTCTGCGACACAGAACATGCCCAGCATTTTCACTGTGCTTCCATTTCAGGAAGAAAGAGCAGATTCCTCAAGGCCTTACCTTCACAGACAGTCAAACGACCGAGG|-TTAGGTAAACTCCCTGGGTAATGATGGGCCTTGCTTGCCTCTTGGCATTGAACTCTGTAGCTTAAAAGCTAAGCTGGGTGGAAGAAGGATTTTCTGGGATAGCACCTATGCT
Tsc1	Del 52|2	0	0	0	0	0	0	0	0	0	0	0	0	0	0	0	39.2672	0	0	0	0	0	0	0	0	0	0	TACTCTGCGACACAGAACATGCCCAGCATTTTCACTGTGCTTCCATTTCAGGAAG----------------------------------------------------|--TAGGTAAACTCCCTGGGTAATGATGGGCCTTGCTTGCCTCTTGGCATTGAACTCTGTAGCTTAAAAGCTAAGCTGGGTGGAAGAAGGATTTTCTGGGATAGCACCTATGCT
Tsc1	Del 9|0	0	0	0	0	0	0	0	0	0	0	0	0	0	0	0	30.3487	0	0	0	0	0	0	0	0	0	0	TACTCTGCGACACAGAACATGCCCAGCATTTTCACTGTGCTTCCATTTCAGGAAGAAAGAGCAGATTCCTCAAGGCCTTACCTTCACAGACAGTCAAA---------|ATTAGGTAAACTCCCTGGGTAATGATGGGCCTTGCTTGCCTCTTGGCATTGAACTCTGTAGCTTAAAAGCTAAGCTGGGTGGAAGAAGGATTTTCTGGGATAGCACCTATGCT
Tsc1	Del 0|2	0	0	0	0	0	0	0	0	0	0	0	0	0	0	0	0	0	0	0	14.3079	16.3055	0	0	0	0	0	TACTCTGCGACACAGAACATGCCCAGCATTTTCACTGTGCTTCCATTTCAGGAAGAAAGAGCAGATTCCTCAAGGCCTTACCTTCACAGACAGTCAAACGACCGAGG|--TAGGTAAACTCCCTGGGTAATGATGGGCCTTGCTTGCCTCTTGGCATTGAACTCTGTAGCTTAAAAGCTAAGCTGGGTGGAAGAAGGATTTTCTGGGATAGCACCTATGCT
Tsc2	WT	30.7942	57.8166	46.9288	26.9729	86.4432	46.7679	69.4817	65.4017	53.2276	49.0457	70.3371	30.5042	11.8912	59.9323	62.9609	21.2526	23.5596	43.859	71.8409	56.0897	67.9971	77.8134	63.2872	71.3644	60.0339	53.9609	CTAAGGTCCCTGGAGGCTACACCCTTCTCACTGTCCCCTTTTTGTCATGGCAGCATGCAGTGGAGGCACTTTGGAAGGCTGTCTCAGACTTGCTACAGCCAGAGCGGCCAC|CAGAGGCCCGGCATGCAGTTCTCACCTTATTGAAGGCCATTGTACAGGGACAGGTAAGGGGTGGAGCTGTGTGAGCCTGTGGGATGAAGGCAGACCGTCACCGTTTGAGCTCCTGC
Tsc2	Del 25|24	60.5716	0	0	0	0	0	0	0	0	0	0	0	0	0	0	0	0	0	0	0	0	0	0	0	0	0	CTAAGGTCCCTGGAGGCTACACCCTTCTCACTGTCCCCTTTTTGTCATGGCAGCATGCAGTGGAGGCACTTTGGAAGGCTGTCTCA------------------------- | ------------------------CCTTATTGAAGGCCATTGTACAGGGACAGGTAAGGGGTGGAGCTGTGTGAGCCTGTGGGATGAAGGCAGACCGTCACCGTTTGAGCTCCTGC
Tsc2	Del 18|12	8.63424	0	0	0	0	0	0	0	0	0	0	0	0	0	0	0	0	0	0	0	0	0	0	0	0	0	CTAAGGTCCCTGGAGGCTACACCCTTCTCACTGTCCCCTTTTTGTCATGGCAGCATGCAGTGGAGGCACTTTGGAAGGCTGTCTCAGACTTGC------------------ | ------------ATGCAGTTCTCACCTTATTGAAGGCCATTGTACAGGGACAGGTAAGGGGTGGAGCTGTGTGAGCCTGTGGGATGAAGGCAGACCGTCACCGTTTGAGCTCCTGC
Tsc2	Del 1|0	0	19.1938	25.5303	35.1044	13.5568	0	30.5183	19.4257	46.7724	50.9543	0	0	44.8967	20.8276	0	0	76.4404	22.106	0	12.1433	15.9927	22.1866	15.2865	11.6371	11.0112	17.8271	CTAAGGTCCCTGGAGGCTACACCCTTCTCACTGTCCCCTTTTTGTCATGGCAGCATGCAGTGGAGGCACTTTGGAAGGCTGTCTCAGACTTGCTACAGCCAGAGCGGCCA-|CAGAGGCCCGGCATGCAGTTCTCACCTTATTGAAGGCCATTGTACAGGGACAGGTAAGGGGTGGAGCTGTGTGAGCCTGTGGGATGAAGGCAGACCGTCACCGTTTGAGCTCCTGC
Tsc2	Ins 1 C	0	9.20496	0	0	0	0	0	0	0	0	0	0	0	0	0	0	0	0	0	0	0	0	0	0	0	0	CTAAGGTCCCTGGAGGCTACACCCTTCTCACTGTCCCCTTTTTGTCATGGCAGCATGCAGTGGAGGCACTTTGGAAGGCTGTCTCAGACTTGCTACAGCCAGAGCGGCCAC{C}|CAGAGGCCCGGCATGCAGTTCTCACCTTATTGAAGGCCATTGTACAGGGACAGGTAAGGGGTGGAGCTGTGTGAGCCTGTGGGATGAAGGCAGACCGTCACCGTTTGAGCTCCTGC
Tsc2	Del 8|0	0	9.89201	0	0	0	0	0	0	0	0	0	0	0	0	0	0	0	0	0	14.2645	0	0	0	0	0	0	CTAAGGTCCCTGGAGGCTACACCCTTCTCACTGTCCCCTTTTTGTCATGGCAGCATGCAGTGGAGGCACTTTGGAAGGCTGTCTCAGACTTGCTACAGCCAG--------C|CAGAGGCCCGGCATGCAGTTCTCACCTTATTGAAGGCCATTGTACAGGGACAGGTAAGGGGTGGAGCTGTGTGAGCCTGTGGGATGAAGGCAGACCGTCACCGTTTGAGCTCCTGC
Tsc2	Del 2|0	0	3.89265	27.5409	0	0	0	0	0	0	0	0	0	0	0	37.0391	0	0	0	0	0	0	0	0.40676	1.41538	7.79267	2.70818	CTAAGGTCCCTGGAGGCTACACCCTTCTCACTGTCCCCTTTTTGTCATGGCAGCATGCAGTGGAGGCACTTTGGAAGGCTGTCTCAGACTTGCTACAGCCAGAGCGGCC--|CAGAGGCCCGGCATGCAGTTCTCACCTTATTGAAGGCCATTGTACAGGGACAGGTAAGGGGTGGAGCTGTGTGAGCCTGTGGGATGAAGGCAGACCGTCACCGTTTGAGCTCCTGC
Tsc2	Del 0|9	0	0	0	37.9228	0	0	0	0	0	0	0	0	0	0	0	0	0	0	0	0	0	0	0	0	0	0	CTAAGGTCCCTGGAGGCTACACCCTTCTCACTGTCCCCTTTTTGTCATGGCAGCATGCAGTGGAGGCACTTTGGAAGGCTGTCTCAGACTTGCTACAGCCAGAGCGGCCAC|---------GGCATGCAGTTCTCACCTTATTGAAGGCCATTGTACAGGGACAGGTAAGGGGTGGAGCTGTGTGAGCCTGTGGGATGAAGGCAGACCGTCACCGTTTGAGCTCCTGC
Tsc2	Del 18|0	0	0	0	0	0	27.7617	0	0	0	0	0	0	0	0	0	0	0	0	0	0	0	0	0	0	0	0	CTAAGGTCCCTGGAGGCTACACCCTTCTCACTGTCCCCTTTTTGTCATGGCAGCATGCAGTGGAGGCACTTTGGAAGGCTGTCTCAGACTTGC------------------|CAGAGGCCCGGCATGCAGTTCTCACCTTATTGAAGGCCATTGTACAGGGACAGGTAAGGGGTGGAGCTGTGTGAGCCTGTGGGATGAAGGCAGACCGTCACCGTTTGAGCTCCTGC
Tsc2	Del 16|2	0	0	0	0	0	25.4704	0	0	0	0	0	0	0	0	0	0	0	0	0	0	0	0	0	0	0	0	CTAAGGTCCCTGGAGGCTACACCCTTCTCACTGTCCCCTTTTTGTCATGGCAGCATGCAGTGGAGGCACTTTGGAAGGCTGTCTCAGACTTGCTA---------------- | --GAGGCCCGGCATGCAGTTCTCACCTTATTGAAGGCCATTGTACAGGGACAGGTAAGGGGTGGAGCTGTGTGAGCCTGTGGGATGAAGGCAGACCGTCACCGTTTGAGCTCCTGC
Tsc2	Del 13|0	0	0	0	0	0	0	0	15.1727	0	0	0	0	43.2121	0	0	0	0	0	0	0	0	0	0	0	0	0	CTAAGGTCCCTGGAGGCTACACCCTTCTCACTGTCCCCTTTTTGTCATGGCAGCATGCAGTGGAGGCACTTTGGAAGGCTGTCTCAGACTTGCTACAG-------------|CAGAGGCCCGGCATGCAGTTCTCACCTTATTGAAGGCCATTGTACAGGGACAGGTAAGGGGTGGAGCTGTGTGAGCCTGTGGGATGAAGGCAGACCGTCACCGTTTGAGCTCCTGC
Tsc2	Del 12|0	0	0	0	0	0	0	0	0	0	0	15.8735	0	0	0	0	36.5728	0	0	0	0	0	0	0.201078	0.657993	5.92572	1.49035	CTAAGGTCCCTGGAGGCTACACCCTTCTCACTGTCCCCTTTTTGTCATGGCAGCATGCAGTGGAGGCACTTTGGAAGGCTGTCTCAGACTTGCTACAGC------------|CAGAGGCCCGGCATGCAGTTCTCACCTTATTGAAGGCCATTGTACAGGGACAGGTAAGGGGTGGAGCTGTGTGAGCCTGTGGGATGAAGGCAGACCGTCACCGTTTGAGCTCCTGC
Tsc2	Del 4|3	0	0	0	0	0	0	0	0	0	0	13.7894	0	0	0	0	0	0	0	0	0	0	0	0	0	0	0	CTAAGGTCCCTGGAGGCTACACCCTTCTCACTGTCCCCTTTTTGTCATGGCAGCATGCAGTGGAGGCACTTTGGAAGGCTGTCTCAGACTTGCTACAGCCAGAGCGG---- | ---AGGCCCGGCATGCAGTTCTCACCTTATTGAAGGCCATTGTACAGGGACAGGTAAGGGGTGGAGCTGTGTGAGCCTGTGGGATGAAGGCAGACCGTCACCGTTTGAGCTCCTGC
Tsc2	Del 32|9	0	0	0	0	0	0	0	0	0	0	0	0	0	0	0	42.1746	0	0	0	0	0	0	0	0	0	0	CTAAGGTCCCTGGAGGCTACACCCTTCTCACTGTCCCCTTTTTGTCATGGCAGCATGCAGTGGAGGCACTTTGGAAGGC--------------------------------|---------GGCATGCAGTTCTCACCTTATTGAAGGCCATTGTACAGGGACAGGTAAGGGGTGGAGCTGTGTGAGCCTGTGGGATGAAGGCAGACCGTCACCGTTTGAGCTCCTGC
Tsc2	Ins 1 A	0	0	0	0	0	0	0	0	0	0	0	0	0	0	0	0	0	20.666	0	0	0	0	0	0	0	0	CTAAGGTCCCTGGAGGCTACACCCTTCTCACTGTCCCCTTTTTGTCATGGCAGCATGCAGTGGAGGCACTTTGGAAGGCTGTCTCAGACTTGCTACAGCCAGAGCGGCCAC{A}|CAGAGGCCCGGCATGCAGTTCTCACCTTATTGAAGGCCATTGTACAGGGACAGGTAAGGGGTGGAGCTGTGTGAGCCTGTGGGATGAAGGCAGACCGTCACCGTTTGAGCTCCTGC
Tsc2	Del 53|67	0	0	0	0	0	0	0	0	0	0	0	0	0	0	0	0	0	13.369	0	0	0	0	0	0	0	0	CTAAGGTCCCTGGAGGCTACACCCTTCTCACTGTCCCCTTTTTGTCATGGCAGCATGC----------------------------------------------------- | -------------------------------------------------------------------TGTGTGAGCCTGTGGGATGAAGGCAGACCGTCACCGTTTGAGCTCCTGC
Tsc2	Del 5|3	0	0	0	0	0	0	0	0	0	0	0	0	0	19.2401	0	0	0	0	0	0	0	0	0	0	0	0	CTAAGGTCCCTGGAGGCTACACCCTTCTCACTGTCCCCTTTTTGTCATGGCAGCATGCAGTGGAGGCACTTTGGAAGGCTGTCTCAGACTTGCTACAGCCAGAGCG----- | ---AGGCCCGGCATGCAGTTCTCACCTTATTGAAGGCCATTGTACAGGGACAGGTAAGGGGTGGAGCTGTGTGAGCCTGTGGGATGAAGGCAGACCGTCACCGTTTGAGCTCCTGC
Tsc2	Del 3|0	0	0	0	0	0	0	0	0	0	0	0	31.3776	0	0	0	0	0	0	0	0	0	0	0	0	0	0	CTAAGGTCCCTGGAGGCTACACCCTTCTCACTGTCCCCTTTTTGTCATGGCAGCATGCAGTGGAGGCACTTTGGAAGGCTGTCTCAGACTTGCTACAGCCAGAGCGGC---|CAGAGGCCCGGCATGCAGTTCTCACCTTATTGAAGGCCATTGTACAGGGACAGGTAAGGGGTGGAGCTGTGTGAGCCTGTGGGATGAAGGCAGACCGTCACCGTTTGAGCTCCTGC
Tsc2	Del 41|7	0	0	0	0	0	0	0	0	0	0	0	38.1182	0	0	0	0	0	0	0	0	0	0	0	0	0	0	CTAAGGTCCCTGGAGGCTACACCCTTCTCACTGTCCCCTTTTTGTCATGGCAGCATGCAGTGGAGGCACT----------------------------------------- | -------CCGGCATGCAGTTCTCACCTTATTGAAGGCCATTGTACAGGGACAGGTAAGGGGTGGAGCTGTGTGAGCCTGTGGGATGAAGGCAGACCGTCACCGTTTGAGCTCCTGC
Tsc2	Del 14|0	0	0	0	0	0	0	0	0	0	0	0	0	0	0	0	0	0	0	14.2278	0	0	0	0	0	0	0	CTAAGGTCCCTGGAGGCTACACCCTTCTCACTGTCCCCTTTTTGTCATGGCAGCATGCAGTGGAGGCACTTTGGAAGGCTGTCTCAGACTTGCTACA--------------|CAGAGGCCCGGCATGCAGTTCTCACCTTATTGAAGGCCATTGTACAGGGACAGGTAAGGGGTGGAGCTGTGTGAGCCTGTGGGATGAAGGCAGACCGTCACCGTTTGAGCTCCTGC
Tsc2	Del 16|0	0	0	0	0	0	0	0	0	0	0	0	0	0	0	0	0	0	0	13.9313	0	0	0	0	0	0	0	CTAAGGTCCCTGGAGGCTACACCCTTCTCACTGTCCCCTTTTTGTCATGGCAGCATGCAGTGGAGGCACTTTGGAAGGCTGTCTCAGACTTGCTA----------------|CAGAGGCCCGGCATGCAGTTCTCACCTTATTGAAGGCCATTGTACAGGGACAGGTAAGGGGTGGAGCTGTGTGAGCCTGTGGGATGAAGGCAGACCGTCACCGTTTGAGCTCCTGC
Tsc2	Del 2|8	0	0	0	0	0	0	0	0	0	0	0	0	0	0	0	0	0	0	0	10.9198	16.0102	0	0	0	0	0	CTAAGGTCCCTGGAGGCTACACCCTTCTCACTGTCCCCTTTTTGTCATGGCAGCATGCAGTGGAGGCACTTTGGAAGGCTGTCTCAGACTTGCTACAGCCAGAGCGGCC-- | --------CGGCATGCAGTTCTCACCTTATTGAAGGCCATTGTACAGGGACAGGTAAGGGGTGGAGCTGTGTGAGCCTGTGGGATGAAGGCAGACCGTCACCGTTTGAGCTCCTGC
Tsc2	Del 9|0	0	0	0	0	0	0	0	0	0	0	0	0	0	0	0	0	0	0	0	6.58258	0	0	0	0	0	0	CTAAGGTCCCTGGAGGCTACACCCTTCTCACTGTCCCCTTTTTGTCATGGCAGCATGCAGTGGAGGCACTTTGGAAGGCTGTCTCAGACTTGCTACAGCCAG---------|CAGAGGCCCGGCATGCAGTTCTCACCTTATTGAAGGCCATTGTACAGGGACAGGTAAGGGGTGGAGCTGTGTGAGCCTGTGGGATGAAGGCAGACCGTCACCGTTTGAGCTCCTGC
Tsc2	Del 3|0 Ins 1T	0	0	0	0	0	0	0	0	0	0	0	0	0	0	0	0	0	0	0	0	0	0	11.6671	7.99431	9.2275	13.4226	CTAAGGTCCCTGGAGGCTACACCCTTCTCACTGTCCCCTTTTTGTCATGGCAGCATGCAGTGGAGGCACTTTGGAAGGCTGTCTCAGACTTGCTACAGCCAGAGCGGC---{T}|CAGAGGCCCGGCATGCAGTTCTCACCTTATTGAAGGCCATTGTACAGGGACAGGTAAGGGGTGGAGCTGTGTGAGCCTGTGGGATGAAGGCAGACCGTCACCGTTTGAGCTCCTGC
Tsc2	Del 5|5 Ins 2 TA	0	0	0	0	0	0	0	0	0	0	0	0	0	0	0	0	0	0	0	0	0	0	9.15133	6.93079	6.00902	10.5909	CTAAGGTCCCTGGAGGCTACACCCTTCTCACTGTCCCCTTTTTGTCATGGCAGCATGCAGTGGAGGCACTTTGGAAGGCTGTCTCAGACTTGCTACAGCCAGAGC-----C|{TA}-----GCCCGGCATGCAGTTCTCACCTTATTGAAGGCCATTGTACAGGGACAGGTAAGGGGTGGAGCTGTGTGAGCCTGTGGGATGAAGGCAGACCGTCACCGTTTGAGCTCCTGC
