# Supplementary material for: Extrachromosomal circular DNA harboring targeted tumor suppressor gene mutations supports intratumor heterogeneity in mouse liver cancer induced by multiplexed CRISPR/Cas9
Source: Research Square preprint supplement (doi:10.21203/rs.3.rs-1333557/v1), 2022-02-10
Supplement: Supplementary file 2 [file 8d6116bc23bb9f4aaa32de00.xlsx]

## Sheet: Reads
Target Gene	Mutation Type	Parental	SG1	SG2	SG4	SG5	SG1-1	SG1-2	SG2-5	SG2-6	SG4-1	SG4-3	SG5-1	SG5-2	Sequence
Apc	WT	1932	38422	5953	13854	11797	2821	4239	3260	2918	2809	3619	527	381	CATGGCATAAAGCAGTTACTACATAAGAACTTGTTTCTGTTTAGAATTTAACTTAGATAGTAATTTCCCCGGAGTGAAACTACGCTCAAAAATGTCCCTTCGCTCCTACG|GAAGTCGGGAAGGATCTGTATCCAGCCGTTCAGGAGAATGCAGTCCTGTCCCCATGGGGTCATTCCCAAGAAGAACATTTGTAAATGGAAGCAGAGAGAGTACTGGGTATC
Apc	Del 1|0	19431	9081	15825	8845	23863	34458	35810	38643	5861	40324	42789	11473	9418	CATGGCATAAAGCAGTTACTACATAAGAACTTGTTTCTGTTTAGAATTTAACTTAGATAGTAATTTCCCCGGAGTGAAACTACGCTCAAAAATGTCCCTTCGCTCCTAC-|GAAGTCGGGAAGGATCTGTATCCAGCCGTTCAGGAGAATGCAGTCCTGTCCCCATGGGGTCATTCCCAAGAAGAACATTTGTAAATGGAAGCAGAGAGAGTACTGGGTATC
Apc	Ins 1 A	57164	8328	28657	16527	31570	63688	73951	73147	83302	78404	77946	23272	19227	CATGGCATAAAGCAGTTACTACATAAGAACTTGTTTCTGTTTAGAATTTAACTTAGATAGTAATTTCCCCGGAGTGAAACTACGCTCAAAAATGTCCCTTCGCTCCTACG|{A}GAAGTCGGGAAGGATCTGTATCCAGCCGTTCAGGAGAATGCAGTCCTGTCCCCATGGGGTCATTCCCAAGAAGAACATTTGTAAATGGAAGCAGAGAGAGTACTGGGTATC
Apob	WT	20	1290	2137	6788	2565	15	54	58	40	10	44	43	45	TCCGAAGACCCTGTAGAGCAAGCAGCAGGGGCTAGGCCCGTGGCCAGGCCACAGCCAGGAAGCCACCCCACCATCCATCCGCCATGGGCCCACGAAAGCCTGCCCTGC|GGACGCCGTTACTGCTGCTGTTCCTGCTACTGTTCTTGGACACCAGCGTCTGGGCTCGTGAGTTAGGGTGGAAGCCTGGGAGAAAGCCA
Apob	Del 0|1	29129	28033	15573	10893	5776	39179	47854	53031	53272	79936	55994	77991	58524	TCCGAAGACCCTGTAGAGCAAGCAGCAGGGGCTAGGCCCGTGGCCAGGCCACAGCCAGGAAGCCACCCCACCATCCATCCGCCATGGGCCCACGAAAGCCTGCCCTGC|-GACGCCGTTACTGCTGCTGTTCCTGCTACTGTTCTTGGACACCAGCGTCTGGGCTCGTGAGTTAGGGTGGAAGCCTGGGAGAAAGCCA
Apob	Ins 1 G	10846	329	5475	3782	4630	25520	15444	26214	23668	699	726	795	800	TCCGAAGACCCTGTAGAGCAAGCAGCAGGGGCTAGGCCCGTGGCCAGGCCACAGCCAGGAAGCCACCCCACCATCCATCCGCCATGGGCCCACGAAAGCCTGCCCTGC|{G}GGACGCCGTTACTGCTGCTGTTCCTGCTACTGTTCTTGGACACCAGCGTCTGGGCTCGTGAGTTAGGGTGGAAGCCTGGGAGAAAGCCA
Apob	Del 19|91	8470	298	3982	3746	2345	13743	15010	14541	17104	1241	1568	1778	1551	TCCGAAGACCCTGTAGAGCAAGCAGCAGGGGCTAGGCCCGTGGCCAGGCCACAGCCAGGAAGCCACCCCACCATCCATCCGCCATGGGC------------------- | -------------------------------------------------------------------------------------------TGGGAGAAAGCCA
Apob	Del 0|6	731	7115	1562	968	56	1967	829	728	2199	41641	28219	72	29388	TCCGAAGACCCTGTAGAGCAAGCAGCAGGGGCTAGGCCCGTGGCCAGGCCACAGCCAGGAAGCCACCCCACCATCCATCCGCCATGGGCCCACGAAAGCCTGCCCTGC|------CGTTACTGCTGCTGTTCCTGCTACTGTTCTTGGACACCAGCGTCTGGGCTCGTGAGTTAGGGTGGAAGCCTGGGAGAAAGCCA
Apob	Del 0|9	1335	14374	3319	1763	82	3767	1542	1340	4162	30	7012	13441	11194	TCCGAAGACCCTGTAGAGCAAGCAGCAGGGGCTAGGCCCGTGGCCAGGCCACAGCCAGGAAGCCACCCCACCATCCATCCGCCATGGGCCCACGAAAGCCTGCCCTGC|G---------ACTGCTGCTGTTCCTGCTACTGTTCTTGGACACCAGCGTCTGGGCTCGTGAGTTAGGGTGGAAGCCTGGGAGAAAGCCA
Arid1a	Del 11|16	7041	7353	3132	3180	2203	5062	3915	6029	7786	10430	9087	6447	6300	TATGCAGAGGAACCCCCAGATGCCCCAGTACACTTCCCCTCAGCCTGGCTCGGCCTTATCCCCACGTCAGCCGTCTGGAGGACAG----------- | ----------------CAGAACTCCATGGGGAGCTACGGCCCCCAGGGCAGTCAGTATGGCCCACAAGGTAAGTGTGCTACCCCTTTAGAAGGAAAGAGAGGTACTGTGTTAACGGCTG
Arid1a	Del 24|25	2449	12595	4487	4256	3215	11661	12022	9197	11378	7039	13532	9340	8793	TATGCAGAGGAACCCCCAGATGCCCCAGTACACTTCCCCTCAGCCTGGCTCGGCCTTATCCCCACGTCAGCC------------------------ | -------------------------ATGGGGAGCTACGGCCCCCAGGGCAGTCAGTATGGCCCACAAGGTAAGTGTGCTACCCCTTTAGAAGGAAAGAGAGGTACTGTGTTAACGGCTG
Arid1b	WT	2	4763	7648	432	5534	22	493	0	628	23	13	295	158	CTTGGGCAAGGACCTAGGCGCCCAGTACGCCGCTGCCAGCCCGGCCTGGGCGGCCGCGCAACAAAGGAGTCACCCGGCGATGAGCCCCGGCACCCCCG|GACCGACCATGGGCAGATCCCAGGTAACCCCCGCGCCCGGCCGGGCCTGCTTCCGCCCGGGCCTCGCGCCGCGAGCCCGACTTTCTTTCTTCGCCGGGTACTTTTCCCGGCGGTTG
Arid1b	Del 23|24	7746	80190	36740	50254	27068	33621	31837	43972	44026	42482	49609	33288	33229	CTTGGGCAAGGACCTAGGCGCCCAGTACGCCGCTGCCAGCCCGGCCTGGGCGGCCGCGCAACAAAGGAGTCACCC----------------------- | ------------------------TAACCCCCGCGCCCGGCCGGGCCTGCTTCCGCCCGGGCCTCGCGCCGCGAGCCCGACTTTCTTTCTTCGCCGGGTACTTTTCCCGGCGGTTG
Arid2	WT	26	19929	3219	6032	3327	120	75	104	53	26	47	53	40	CAGCTTAACATAGGGCTTCCTGTGGTATATAATGTCTTTATTCCTCTCTCTCTCTCTTTTAGGCTAAATGCTCATTTTGAAGTAAATCCAGAC|TGTTCCGTCTCTCGGGCAGAAATGTATTCAGAGTACCTCTCAACTTGCAGTAAATTAGCTCGCGGTGGCATCCTCACATCAACTGGGTTTTATAAGTGTCTTAGGTAACTCGCACAGCTC
Arid2	Ins 1 T	16507	9556	8342	4685	5925	25345	27699	23756	15928	11417	25869	23178	30179	CAGCTTAACATAGGGCTTCCTGTGGTATATAATGTCTTTATTCCTCTCTCTCTCTCTTTTAGGCTAAATGCTCATTTTGAAGTAAATCCAGAC|{T}TGTTCCGTCTCTCGGGCAGAAATGTATTCAGAGTACCTCTCAACTTGCAGTAAATTAGCTCGCGGTGGCATCCTCACATCAACTGGGTTTTATAAGTGTCTTAGGTAACTCGCACAGCTC
Arid2	Ins 2 AG	13351	3893	1886	2027	6169	17666	19430	1176	821	19128	22075	862	1060	CAGCTTAACATAGGGCTTCCTGTGGTATATAATGTCTTTATTCCTCTCTCTCTCTCTTTTAGGCTAAATGCTCATTTTGAAGTAAATCCAGAC|{AG}TGTTCCGTCTCTCGGGCAGAAATGTATTCAGAGTACCTCTCAACTTGCAGTAAATTAGCTCGCGGTGGCATCCTCACATCAACTGGGTTTTATAAGTGTCTTAGGTAACTCGCACAGCTC
Arid2	Del 0|2	11831	4044	8906	5613	5604	20838	18167	18062	12993	8478	21145	18525	24636	CAGCTTAACATAGGGCTTCCTGTGGTATATAATGTCTTTATTCCTCTCTCTCTCTCTTTTAGGCTAAATGCTCATTTTGAAGTAAATCCAGAC|--TTCCGTCTCTCGGGCAGAAATGTATTCAGAGTACCTCTCAACTTGCAGTAAATTAGCTCGCGGTGGCATCCTCACATCAACTGGGTTTTATAAGTGTCTTAGGTAACTCGCACAGCTC
Arid2	Del 0|3	1208	2409	349	335	139	2548	2126	1443	691	727	1713	1649	2242	CAGCTTAACATAGGGCTTCCTGTGGTATATAATGTCTTTATTCCTCTCTCTCTCTCTTTTAGGCTAAATGCTCATTTTGAAGTAAATCCAGAC|---TCCGTCTCTCGGGCAGAAATGTATTCAGAGTACCTCTCAACTTGCAGTAAATTAGCTCGCGGTGGCATCCTCACATCAACTGGGTTTTATAAGTGTCTTAGGTAACTCGCACAGCTC
Atm	WT	171034	118474	111715	98647	242362	131714	192116	156160	193701	216713	194906	183242	202052	TCTGTCATTCATTGGTGAAGAAATCAAAGTAGAAAAACATTGAGCGACTGCTCTAAAGTCCTATTATTCCCATTTTCTTAAACATCATGTTTTTCCTTTCTGCAGGTTTTAGAGAAAGTCTCCGAATC|GTTTGGATGTAGAAGTTTAGAAGACTTCATGATTTCTCACCTAGACTACCTGGTTTTGGAATGGCTGAACCTTCAAGATACTG
Axin1	WT	82	44067	10585	22805	9327	52	34	274	193	28	21	91	116	GTTCTGAGGCCCGTCATCTGGTCCCTGCCTCAGCCAATAGGCGGCAGGAGCCCGAGCTGCAGCCTAGAGTCACGCTTCTGCCTCCCAGCCACACAGTGGCCAAGAGCAGG|GACCGGCTTCCTAGAGTGGCTGAAAGTGCTCGGACGGACAGCCAAGCCCATCATGGCGGACAGCGGGACAGTGGGTCGTGATCAGGCACTTGGAGCCAGGCAGGTGAGGTAA
Axin1	Del 1|0	68829	37523	106123	55046	70393	92957	77429	87050	94641	79926	79989	107706	31728	GTTCTGAGGCCCGTCATCTGGTCCCTGCCTCAGCCAATAGGCGGCAGGAGCCCGAGCTGCAGCCTAGAGTCACGCTTCTGCCTCCCAGCCACACAGTGGCCAAGAGCAG-|GACCGGCTTCCTAGAGTGGCTGAAAGTGCTCGGACGGACAGCCAAGCCCATCATGGCGGACAGCGGGACAGTGGGTCGTGATCAGGCACTTGGAGCCAGGCAGGTGAGGTAA
Cdkn2a	WT	19050	33829	4834	13115	5811	2018	285	205	239	4005	212	443	350	CAGGTGATGATGATGGGCAACGTTCACGTAGCAGCTCTTCTGCTCAACTACGGTGCAGATTCGAACTGCGAGGACCCCACTACCTTCTCCCGCCC|GGTGCACGACGCAGCGCGGGAAGGCTTCCTGGACACGCTGGTGGTGCTGCACGGGTCAGGGGCTCGGCTGGATGTGCGCGATGCCTGGGGTCGCCTGCCGCTCGACTTGGCCCAAGA
Cdkn2a	Del 0|1	370	23363	37951	28208	32533	32804	37078	32262	38281	31255	39085	52722	62585	CAGGTGATGATGATGGGCAACGTTCACGTAGCAGCTCTTCTGCTCAACTACGGTGCAGATTCGAACTGCGAGGACCCCACTACCTTCTCCCGCCC|-GTGCACGACGCAGCGCGGGAAGGCTTCCTGGACACGCTGGTGGTGCTGCACGGGTCAGGGGCTCGGCTGGATGTGCGCGATGCCTGGGGTCGCCTGCCGCTCGACTTGGCCCAAGA
Cdkn2a	Ins 1 G	7640	6953	12987	3277	11092	438	324	7466	11681	8192	10399	12441	18107	CAGGTGATGATGATGGGCAACGTTCACGTAGCAGCTCTTCTGCTCAACTACGGTGCAGATTCGAACTGCGAGGACCCCACTACCTTCTCCCGCCC|{G}GGTGCACGACGCAGCGCGGGAAGGCTTCCTGGACACGCTGGTGGTGCTGCACGGGTCAGGGGCTCGGCTGGATGTGCGCGATGCCTGGGGTCGCCTGCCGCTCGACTTGGCCCAAGA
Chd1	WT	32	8472	1653	2557	697	19	32	61	54	26	51	33	98	AGCGACTCTGATTCTGGCTCTGACTCAGGAAGTCAATCAGAGTCTGAATCAGACACATCCCGAGAGAACAAGGTTCAAGCAAAACCACCAAAAGT|CGACGGAGCCGAGGTAAGTTAGTGCAATTGAACTGGCTTAAGACAGAAGTTAAATCTTATAACTGACTGGACAGTGTCATGGCCTGGGCATATAGCGCAGCAGTACAGCAC
Chd1	Ins 1 T	20065	4244	7755	3455	2371	21206	20408	25694	25133	23005	32922	34142	28332	AGCGACTCTGATTCTGGCTCTGACTCAGGAAGTCAATCAGAGTCTGAATCAGACACATCCCGAGAGAACAAGGTTCAAGCAAAACCACCAAAAGT{T}|CGACGGAGCCGAGGTAAGTTAGTGCAATTGAACTGGCTTAAGACAGAAGTTAAATCTTATAACTGACTGGACAGTGTCATGGCCTGGGCATATAGCGCAGCAGTACAGCAC
Chd1	Del 0|2	5557	3531	7638	2742	2196	28146	26342	21785	22646	20325	28798	30296	25752	AGCGACTCTGATTCTGGCTCTGACTCAGGAAGTCAATCAGAGTCTGAATCAGACACATCCCGAGAGAACAAGGTTCAAGCAAAACCACCAAAAGT|--ACGGAGCCGAGGTAAGTTAGTGCAATTGAACTGGCTTAAGACAGAAGTTAAATCTTATAACTGACTGGACAGTGTCATGGCCTGGGCATATAGCGCAGCAGTACAGCAC
Col1a1	WT	499	21637	3146	7149	2157	596	1389	955	648	589	1529	731	1252	AGTCCAAGACCTTCTCCCAGCATGAAGAGGATGCTAAACCCGTGGTAATAAGGCCAAGGCTGTGGCCCTGATGCGTCTGTGACTTCTCTCCACTTAGGGTCCTTCCGGTGA|ACGTGGTGCTCCCGGACCTGCTGGTCCCAAAGGTTCTCCTGGTGAAGCTGGTCGCCCCGGTGAAGCTGGTCTCCCTGGTGCCAAGGTGAGAAGATCCTCTGTCCTGTATGG
Col1a1	Del 1|0	1643	830	95	128	46	2133	4839	2184	2159	93265	89747	96891	171662	AGTCCAAGACCTTCTCCCAGCATGAAGAGGATGCTAAACCCGTGGTAATAAGGCCAAGGCTGTGGCCCTGATGCGTCTGTGACTTCTCTCCACTTAGGGTCCTTCCGGTG-|ACGTGGTGCTCCCGGACCTGCTGGTCCCAAAGGTTCTCCTGGTGAAGCTGGTCGCCCCGGTGAAGCTGGTCTCCCTGGTGCCAAGGTGAGAAGATCCTCTGTCCTGTATGG
Col1a1	Ins 1 T	51139	9241	16284	8478	7859	84122	76844	82356	90219	2255	6335	2615	5232	AGTCCAAGACCTTCTCCCAGCATGAAGAGGATGCTAAACCCGTGGTAATAAGGCCAAGGCTGTGGCCCTGATGCGTCTGTGACTTCTCTCCACTTAGGGTCCTTCCGGTGA{T}|ACGTGGTGCTCCCGGACCTGCTGGTCCCAAAGGTTCTCCTGGTGAAGCTGGTCGCCCCGGTGAAGCTGGTCTCCCTGGTGCCAAGGTGAGAAGATCCTCTGTCCTGTATGG
Dlc1	WT	99	7166	679	1700	339	159	206	156	92	161	162	86	131	ACGAAAGCATGCTGACAGACCTCAGCGAGCACCAGGAGGTGGCCTCTGTCCGAAGCCTCAGCAGCACCAGCAGCAGCGTCCCCACCCACGCAGCCCACAGTGGAGATGCCACTACGCCCCGAAC|CAATTCCGTCATCAGCGTCTGCTCCTCCGGACACTTTGTAGGCAATGATGACTCTTTTTCCAGCCTGCCGTCTCCCAAGGAACTGTCCAGCTTCAGT
Dlc1	Del 1|0	13080	4574	3366	3325	1732	22746	23762	20483	17107	30513	30036	16514	18004	ACGAAAGCATGCTGACAGACCTCAGCGAGCACCAGGAGGTGGCCTCTGTCCGAAGCCTCAGCAGCACCAGCAGCAGCGTCCCCACCCACGCAGCCCACAGTGGAGATGCCACTACGCCCCGAA-|CAATTCCGTCATCAGCGTCTGCTCCTCCGGACACTTTGTAGGCAATGATGACTCTTTTTCCAGCCTGCCGTCTCCCAAGGAACTGTCCAGCTTCAGT
Dlc1	Del 0|16	3239	1512	1641	1095	573	7248	5352	7183	7718	6960	6196	7074	7168	ACGAAAGCATGCTGACAGACCTCAGCGAGCACCAGGAGGTGGCCTCTGTCCGAAGCCTCAGCAGCACCAGCAGCAGCGTCCCCACCCACGCAGCCCACAGTGGAGATGCCACTACGCCCCGAAC|----------------GTCTGCTCCTCCGGACACTTTGTAGGCAATGATGACTCTTTTTCCAGCCTGCCGTCTCCCAAGGAACTGTCCAGCTTCAGT
Fbxw7	WT	133190	261696	275093	58461	233646	154974	130362	172248	190270	158621	182026	79088	146518	GTGTGAGTATGCCTTCCCTATTTCCTTTTCCATAGTTGGCACTCTATGTGCTTTCATTCCTGGAACCCAAAGACCTGCTGCAAGCGGCTCAGACTTGTCGA|TACTGGAGAATTTTGGCTGAGGATAACCTTCTCTGGAGAGAGAAATGTAAAGAAGAGGGTAAGTTCAGAATCACACACAGATGTGTTTCTACTCTGGAAACAAGTTAACAGAATAACTTGGCTGTGAGTGAGAGT
Fbxw7	Del 3|0	2449	4844	2862	109486	22701	2587	4475	2357	2848	2095	3013	2036	2661	GTGTGAGTATGCCTTCCCTATTTCCTTTTCCATAGTTGGCACTCTATGTGCTTTCATTCCTGGAACCCAAAGACCTGCTGCAAGCGGCTCAGACTTGT---|TACTGGAGAATTTTGGCTGAGGATAACCTTCTCTGGAGAGAGAAATGTAAAGAAGAGGGTAAGTTCAGAATCACACACAGATGTGTTTCTACTCTGGAAACAAGTTAACAGAATAACTTGGCTGTGAGTGAGAGT
Fbxw7	Del 0|5	2296	4817	2151	110000	23656	2306	3650	2036	2846	2183	2965	1765	2210	GTGTGAGTATGCCTTCCCTATTTCCTTTTCCATAGTTGGCACTCTATGTGCTTTCATTCCTGGAACCCAAAGACCTGCTGCAAGCGGCTCAGACTTGTCGA|-----GAGAATTTTGGCTGAGGATAACCTTCTCTGGAGAGAGAAATGTAAAGAAGAGGGTAAGTTCAGAATCACACACAGATGTGTTTCTACTCTGGAAACAAGTTAACAGAATAACTTGGCTGTGAGTGAGAGT
Hic1	WT	1452	2614	2274	1899	455	4470	9530	3386	4171	6839	7639	9159	5673	CTACGCTCCTTACGGGCGGCCCGGCCGGGGCTTGAGGGCTGCCACGCCCGTCATCCAGGCTTGCTACTCGTCCCCGGCCGGGCCACCGCCGCCGCCTGCCGCCGAGCCGCCGTCG|GGCCCCGATGCAGCCGTCAACACCCACTGCGCTGAGCTATATGCTTCAGGCCCGGGCCCAGCAGCCTCACTCTGCGCCCCGGAGCGTCGCTGCTCCCCGCTTTG
Hic1	Del 1|0	323	1796	437	1304	100	1688	1328	2218	757	2090	1987	1443	1849	CTACGCTCCTTACGGGCGGCCCGGCCGGGGCTTGAGGGCTGCCACGCCCGTCATCCAGGCTTGCTACTCGTCCCCGGCCGGGCCACCGCCGCCGCCTGCCGCCGAGCCGCCGTC-|GGCCCCGATGCAGCCGTCAACACCCACTGCGCTGAGCTATATGCTTCAGGCCCGGGCCCAGCAGCCTCACTCTGCGCCCCGGAGCGTCGCTGCTCCCCGCTTTG
Hic1	Ins 1G	0	497	98	421	6	390	543	471	149	637	299	737	301	CTACGCTCCTTACGGGCGGCCCGGCCGGGGCTTGAGGGCTGCCACGCCCGTCATCCAGGCTTGCTACTCGTCCCCGGCCGGGCCACCGCCGCCGCCTGCCGCCGAGCCGCCGTCG|{G}GGCCCCGATGCAGCCGTCAACACCCACTGCGCTGAGCTATATGCTTCAGGCCCGGGCCCAGCAGCCTCACTCTGCGCCCCGGAGCGTCGCTGCTCCCCGCTTTG
Hic1	Del 0|63	26	322	40	33	0	817	236	88	63	55	198	23	11	CTACGCTCCTTACGGGCGGCCCGGCCGGGGCTTGAGGGCTGCCACGCCCGTCATCCAGGCTTGCTACTCGTCCCCGGCCGGGCCACCGCCGCCGCCTGCCGCCGAGCCGCCGTCG|---------------------------------------------------------------GCCTCACTCTGCGCCCCGGAGCGTCGCTGCTCCCCGCTTTG
Hnf1a	WT	55987	91579	128643	99809	109372	139430	135800	143538	173827	166153	209383	242254	140808	GCCCTACCTGATGGTTGGAGAGGGTCCCCTGGACAAGGGGGAGTCCTGCGGTGGGAGTCGAGGGGACCTGACCGAGTTGCCTAATGGCCTTGG|AGAAACGCGTGGCTCTGAAGATGACACGGATGACGATGGGGAAGACTTCGCGCCACCCATTCTGAAAGAGCTGGAGAACCTCAGCCCAGAGGAGGCAGCCCACCAGAAAGCCGTGGTGGAGTCA
Keap1	WT	999	19739	16346	9524	12922	5378	1592	12110	11240	8062	6342	30930	15685	CTTCTACGTGCAGGCACTGCTGCGGGCCGTGCGCTGCCATGCGCTCACGCCGCGCTTCCTGCAGACGCAGCTGCAGAAGTGTGAGATCCTGCAGGCCGACG|CGCGCTGCAAGGACTACCTGGTGCAGATATTCCAGGAGCTCACGCTGCACAAGCCCACGCAGGCAGTGCCCTGCCGCGCGCCCAAAGTGGGCCGCCTCATCTACACAGCGGGCGGTTACTTCCGACAGTCGCT
Kmt2a	WT	219	83758	12095	29952	51504	931	372	591	341	154	755	355	462	AGTTGCTGGCTCAGAAGATGCCGAGCCTCTTGCTCCTCCCATCAAACCAATTAAGCCTGTCACCAGAAACAAGGCACCTCAGGAGCCTCCGGTGAAGAAAGGGCGGCGATCA|AGGCGGTGCGGACAATGTCCTGGCTGCCAGGTGCCTGAGGACTGTGGCATTTGCACTAATTGCCTGGACAAGCCCAAGTTTGGTGGCCGCAATATA
Kmt2a	Del 6|0	30509	20948	34363	20824	112524	26462	31417	40476	59681	37870	41041	79401	89203	AGTTGCTGGCTCAGAAGATGCCGAGCCTCTTGCTCCTCCCATCAAACCAATTAAGCCTGTCACCAGAAACAAGGCACCTCAGGAGCCTCCGGTGAAGAAAGGGCGG------|AGGCGGTGCGGACAATGTCCTGGCTGCCAGGTGCCTGAGGACTGTGGCATTTGCACTAATTGCCTGGACAAGCCCAAGTTTGGTGGCCGCAATATA
Kmt2a	Del 7|0	28976	19813	31947	21305	112250	26357	30302	38309	55204	36256	39240	39025	84052	AGTTGCTGGCTCAGAAGATGCCGAGCCTCTTGCTCCTCCCATCAAACCAATTAAGCCTGTCACCAGAAACAAGGCACCTCAGGAGCCTCCGGTGAAGAAAGGGC-------A|AGGCGGTGCGGACAATGTCCTGGCTGCCAGGTGCCTGAGGACTGTGGCATTTGCACTAATTGCCTGGACAAGCCCAAGTTTGGTGGCCGCAATATA
Kmt2a	Ins 1 A	28702	18722	30228	20513	94075	30335	30148	37650	49911	35082	43339	39060	83494	AGTTGCTGGCTCAGAAGATGCCGAGCCTCTTGCTCCTCCCATCAAACCAATTAAGCCTGTCACCAGAAACAAGGCACCTCAGGAGCCTCCGGTGAAGAAAGGGCGGCGATCA{A}|AGGCGGTGCGGACAATGTCCTGGCTGCCAGGTGCCTGAGGACTGTGGCATTTGCACTAATTGCCTGGACAAGCCCAAGTTTGGTGGCCGCAATATA
Kmt2a	Del 3|0 Ins 2GA	3066	1607	618	2524	1052	13204	5126	5455	2847	1664	12233	8733	8375	AGTTGCTGGCTCAGAAGATGCCGAGCCTCTTGCTCCTCCCATCAAACCAATTAAGCCTGTCACCAGAAACAAGGCACCTCAGGAGCCTCCGGTGAAGAAAGGGCGGCGA---{GA}|AGGCGGTGCGGACAATGTCCTGGCTGCCAGGTGCCTGAGGACTGTGGCATTTGCACTAATTGCCTGGACAAGCCCAAGTTTGGTGGCCGCAATATA
Kmt2a	Del 1|0	2029	1482	419	2245	876	10566	4019	4019	1951	955	7858	5310	4787	AGTTGCTGGCTCAGAAGATGCCGAGCCTCTTGCTCCTCCCATCAAACCAATTAAGCCTGTCACCAGAAACAAGGCACCTCAGGAGCCTCCGGTGAAGAAAGGGCGGCGAT-A|AGGCGGTGCGGACAATGTCCTGGCTGCCAGGTGCCTGAGGACTGTGGCATTTGCACTAATTGCCTGGACAAGCCCAAGTTTGGTGGCCGCAATATA
Kmt2a	Del 3|0	1443	1080	287	1452	718	6619	2680	2727	1376	773	5924	4298	3681	AGTTGCTGGCTCAGAAGATGCCGAGCCTCTTGCTCCTCCCATCAAACCAATTAAGCCTGTCACCAGAAACAAGGCACCTCAGGAGCCTCCGGTGAAGAAAGGGCGGCGA---|AGGCGGTGCGGACAATGTCCTGGCTGCCAGGTGCCTGAGGACTGTGGCATTTGCACTAATTGCCTGGACAAGCCCAAGTTTGGTGGCCGCAATATA
Kmt2c	WT	168098	168931	185008	166845	381422	225651	204899	226672	280288	195035	237878	162656	226397	CTCATGCCAAACCAGGATCCTTTTTTGCAAGCAGCACAAAACCGAGTACCAGGTTTACCTGGCCCTTTGATAAGGCCACCTGATACATGCTCCCAGACTCCCAGGCCACCTGGGCCTGGC|CGTATAGACACATTCACTCATGCTTCCTCATCTGCTGTTCGTGATCCATATGATCAGCCTCCAGTGACTCCCAGGCCTCATTCTGAGTCTTTCG
Lkb1	WT	1840	90692	17397	37063	19721	2265	1731	1254	1476	1451	2849	1188	1291	ATCGACTCCACCGAGGTAATCTACCAGCCGCGCCGCAAACGCGCCAAGCTCATCGGCAAGTACCTGATGGGGGACCTGCTCGGGGAGGGCTCGTACG|GCAAGGTGAAGGAGGTGCTGGACTCCGAGACCTTATGCCGCAGGGCGGTCAAGATCCTCAAGAAGAAAAAGCTGCGCAGGATCCCCAATGGAGAGGCCAACGTCAAGAAGTA
Lkb1	Del 4|0	5504	661	415	863	370	5054	3782	2366	3725	25687	24075	51984	52114	ATCGACTCCACCGAGGTAATCTACCAGCCGCGCCGCAAACGCGCCAAGCTCATCGGCAAGTACCTGATGGGGGACCTGCTCGGGGAGGGCTCG----|GCAAGGTGAAGGAGGTGCTGGACTCCGAGACCTTATGCCGCAGGGCGGTCAAGATCCTCAAGAAGAAAAAGCTGCGCAGGATCCCCAATGGAGAGGCCAACGTCAAGAAGTA
Lkb1	Del 5|2	19745	20850	43226	20045	35877	18873	17982	22107	38783	25355	25113	50018	52740	ATCGACTCCACCGAGGTAATCTACCAGCCGCGCCGCAAACGCGCCAAGCTCATCGGCAAGTACCTGATGGGGGACCTGCTCGGGGAGGGCTC----- | --AAGGTGAAGGAGGTGCTGGACTCCGAGACCTTATGCCGCAGGGCGGTCAAGATCCTCAAGAAGAAAAAGCTGCGCAGGATCCCCAATGGAGAGGCCAACGTCAAGAAGTA
Lkb1	Ins 1G	20176	20435	42242	22684	37174	18552	19271	21888	37681	2961	6387	2693	2691	ATCGACTCCACCGAGGTAATCTACCAGCCGCGCCGCAAACGCGCCAAGCTCATCGGCAAGTACCTGATGGGGGACCTGCTCGGGGAGGGCTCGTACG{G}|GCAAGGTGAAGGAGGTGCTGGACTCCGAGACCTTATGCCGCAGGGCGGTCAAGATCCTCAAGAAGAAAAAGCTGCGCAGGATCCCCAATGGAGAGGCCAACGTCAAGAAGTA
Lkb1	Del1|0	3089	514	350	814	149	3780	2268	1609	2174	2021	4124	1681	1705	ATCGACTCCACCGAGGTAATCTACCAGCCGCGCCGCAAACGCGCCAAGCTCATCGGCAAGTACCTGATGGGGGACCTGCTCGGGGAGGGCTCGTAC-|GCAAGGTGAAGGAGGTGCTGGACTCCGAGACCTTATGCCGCAGGGCGGTCAAGATCCTCAAGAAGAAAAAGCTGCGCAGGATCCCCAATGGAGAGGCCAACGTCAAGAAGTA
Mlh1	WT	240	14667	2057	3696	1457	354	425	558	429	357	405	251	491	ATGTGCTAAAACCTGGCCTTTTTTACTCTTTTCTCTCTTGAAACAGACCTTGCTTCCAGGACTTGCTGGGCCTTCTGGGGAGGCAGCTAGACCCACGA|CAGGGGTGGCTTCCTCATCCACTAGTGGAAGTGGCGACAAGGTCTACGCTTACCAGATGGTCCGTACGGACTCCCGGGAGCAGAAGCTTGACGCCTTTCTGCAGCCTGTAAG
Mlh1	Del 2|0	11018	3543	5819	2852	2774	15338	12726	14956	19971	17442	19156	17143	31495	ATGTGCTAAAACCTGGCCTTTTTTACTCTTTTCTCTCTTGAAACAGACCTTGCTTCCAGGACTTGCTGGGCCTTCTGGGGAGGCAGCTAGACCCAC--|CAGGGGTGGCTTCCTCATCCACTAGTGGAAGTGGCGACAAGGTCTACGCTTACCAGATGGTCCGTACGGACTCCCGGGAGCAGAAGCTTGACGCCTTTCTGCAGCCTGTAAG
Mlh1	Del 1|3	10342	3362	5563	2310	2529	14584	12013	13637	19180	15894	16629	31454	28988	ATGTGCTAAAACCTGGCCTTTTTTACTCTTTTCTCTCTTGAAACAGACCTTGCTTCCAGGACTTGCTGGGCCTTCTGGGGAGGCAGCTAGACCCACG-|---GGGTGGCTTCCTCATCCACTAGTGGAAGTGGCGACAAGGTCTACGCTTACCAGATGGTCCGTACGGACTCCCGGGAGCAGAAGCTTGACGCCTTTCTGCAGCCTGTAAG
Mlh1	Del 8|0	9202	3264	5097	2277	2349	12454	8928	11158	16398	12354	13046	12340	28585	ATGTGCTAAAACCTGGCCTTTTTTACTCTTTTCTCTCTTGAAACAGACCTTGCTTCCAGGACTTGCTGGGCCTTCTGGGGAGGCAGCTAG--------|CAGGGGTGGCTTCCTCATCCACTAGTGGAAGTGGCGACAAGGTCTACGCTTACCAGATGGTCCGTACGGACTCCCGGGAGCAGAAGCTTGACGCCTTTCTGCAGCCTGTAAG
Mlh1	Del 3|0	1611	335	165	126	112	2912	3328	4916	3103	2509	2755	1827	3931	ATGTGCTAAAACCTGGCCTTTTTTACTCTTTTCTCTCTTGAAACAGACCTTGCTTCCAGGACTTGCTGGGCCTTCTGGGGAGGCAGCTAGACCCA---|CAGGGGTGGCTTCCTCATCCACTAGTGGAAGTGGCGACAAGGTCTACGCTTACCAGATGGTCCGTACGGACTCCCGGGAGCAGAAGCTTGACGCCTTTCTGCAGCCTGTAAG
Mst1	WT	88	7838	877	2406	472	100	151	746	148	96	99	46	71	TGGGGTCAATCAAGCCTAAGGAGGGAGTGATAGGCCTGCCCCCACTTAGAAGTGCATTGGCCCTGTTTCCAGCTGTTTGTGTTCTGTGCAACGGTGAGGATTA|CCGTGGCGAGGTAGACGTTACAGAGTCAGGGCGGGAGTGTCAACGCTGGGACCTGCAGCACCCCCACTCGCACCCTTTCCAGCCTGAAAAGTATGTAGGCA
Mst1	Del 1|0	10851	3383	4209	3019	1916	21888	22847	20654	22792	24700	24645	9835	11800	TGGGGTCAATCAAGCCTAAGGAGGGAGTGATAGGCCTGCCCCCACTTAGAAGTGCATTGGCCCTGTTTCCAGCTGTTTGTGTTCTGTGCAACGGTGAGGATT-|CCGTGGCGAGGTAGACGTTACAGAGTCAGGGCGGGAGTGTCAACGCTGGGACCTGCAGCACCCCCACTCGCACCCTTTCCAGCCTGAAAAGTATGTAGGCA
Mst1	Del 3|0	5482	1735	2403	1696	907	10489	11302	8829	11462	12147	12321	3242	6219	TGGGGTCAATCAAGCCTAAGGAGGGAGTGATAGGCCTGCCCCCACTTAGAAGTGCATTGGCCCTGTTTCCAGCTGTTTGTGTTCTGTGCAACGGTGAGGA---|CCGTGGCGAGGTAGACGTTACAGAGTCAGGGCGGGAGTGTCAACGCTGGGACCTGCAGCACCCCCACTCGCACCCTTTCCAGCCTGAAAAGTATGTAGGCA
Mst1	Ins 1A	148	18	10	12	4	327	190	1738	126	197	179	83	51	TGGGGTCAATCAAGCCTAAGGAGGGAGTGATAGGCCTGCCCCCACTTAGAAGTGCATTGGCCCTGTTTCCAGCTGTTTGTGTTCTGTGCAACGGTGAGGATTA{A}|CCGTGGCGAGGTAGACGTTACAGAGTCAGGGCGGGAGTGTCAACGCTGGGACCTGCAGCACCCCCACTCGCACCCTTTCCAGCCTGAAAAGTATGTAGGCA
Msx1	WT	93387	167962	151019	130353	188702	134109	109741	140188	169125	89696	160027	138297	155081	TCATGGCCGATCACAGGAAGCCCGGGGCCAAGGAGAGCGTCCTGGTGGCCTCCGAAGGGGCTCAGGCAGCGGGTGGCTCGGTGCAGCACTTGGGCACCCGGCCCGGGT|CTCTGGGCGCCCCGGATGCGCCCTCCTCGCCGCGGCCTCTCGGCCATTTCTCAGTCGGAGGACTCCTCAAGCTGCCAGAAGATGCTCTGGTGAAGGCCGAAAGCCCCGAGAAACTAGA
Msx1	Del 0|2	2091	7699	628	1851	1263	3720	5370	3490	3784	3156	5197	3020	5600	TCATGGCCGATCACAGGAAGCCCGGGGCCAAGGAGAGCGTCCTGGTGGCCTCCGAAGGGGCTCAGGCAGCGGGTGGCTCGGTGCAGCACTTGGGCACCCGGCCCGGGT|--CTGGGCGCCCCGGATGCGCCCTCCTCGCCGCGGCCTCTCGGCCATTTCTCAGTCGGAGGACTCCTCAAGCTGCCAGAAGATGCTCTGGTGAAGGCCGAAAGCCCCGAGAAACTAGA
Msx1	Del 0|3	2002	10375	622	1644	1330	3301	4385	3051	3319	2574	4475	2496	4764	TCATGGCCGATCACAGGAAGCCCGGGGCCAAGGAGAGCGTCCTGGTGGCCTCCGAAGGGGCTCAGGCAGCGGGTGGCTCGGTGCAGCACTTGGGCACCCGGCCCGGGT|---TGGGCGCCCCGGATGCGCCCTCCTCGCCGCGGCCTCTCGGCCATTTCTCAGTCGGAGGACTCCTCAAGCTGCCAGAAGATGCTCTGGTGAAGGCCGAAAGCCCCGAGAAACTAGA
Nf1	WT	69606	57993	40646	31405	50081	98506	79595	95001	98008	117107	119415	111720	166770	GACTGTGTGGAGGGATTATGTTTTAAATGTAGGATGTGTGGCTGTGGCTATTGGCCTGACTGTGTGTTTCTTTAGGTGTATGGTGCTACTTACCTACAAAAGCTCTTGGACCCTTT|ATTACGAGTCATCATCACATCTTCGGATTGGCAACATGTTAGCTTTGAAGTGGATCCTACCAGGTTTGTCATCTTGTCACAGTTGCTCCCTCACTC
Notch3	WT	9227	56794	68808	35027	69733	16135	14039	13001	30010	11650	34776	281	157	CATACGCTGTGAGAGCCAGGTGGATGAGTGCCGCAGCCAGCCCTGTCGATATGGGGGCAAATGTCTAGACTTGGTGGACAAGTACCTCTGCCGTTGTCC|TCCCGGAACCACAGGTGGGGCCTGGGGCTGGGCTATAACAGTACGTGGGGGTGTGTGGGGGTCTGTGATGAATTTGTAACTGGTGCTTGACAATAGTAGGTACTCTTGCCATACTTCTTCCCTCCCT
Notch3	Del 1|0	313	6151	850	607	684	379	476	381	783	291	1102	281	3	CATACGCTGTGAGAGCCAGGTGGATGAGTGCCGCAGCCAGCCCTGTCGATATGGGGGCAAATGTCTAGACTTGGTGGACAAGTACCTCTGCCGTTGTC-|TCCCGGAACCACAGGTGGGGCCTGGGGCTGGGCTATAACAGTACGTGGGGGTGTGTGGGGGTCTGTGATGAATTTGTAACTGGTGCTTGACAATAGTAGGTACTCTTGCCATACTTCTTCCCTCCCT
P53	WT	1014	90221	16230	32387	35972	1237	957	1008	1453	823	1224	1306	1339	AGCCATAGGGGTTTGTTTGTTTGTATGTTTTTTAATTGACAAGTTATGCATCCATACAGTACACAATCTCTTCTCTCTACAGATGACTGCCATGGAGGAGTCACAGTCGGATATCAGCCTCGAGCTCCCTCTGA|GCCAGGAGACATTTTCAGGCTTATGGAAACTGTGAGTGGATCTTTTTGGGGCCCTTAAGATACATCCCGCCATACCTGTATCCTCCCCTTGCCTGAGAGAA
P53	Del 1|0	43954	42090	74319	40556	92030	72887	51956	49061	89522	57410	76156	53302	82000	AGCCATAGGGGTTTGTTTGTTTGTATGTTTTTTAATTGACAAGTTATGCATCCATACAGTACACAATCTCTTCTCTCTACAGATGACTGCCATGGAGGAGTCACAGTCGGATATCAGCCTCGAGCTCCCTCTG-|GCCAGGAGACATTTTCAGGCTTATGGAAACTGTGAGTGGATCTTTTTGGGGCCCTTAAGATACATCCCGCCATACCTGTATCCTCCCCTTGCCTGAGAGAA
P53	Ins 1 A	55926	22307	37673	25836	61809	74384	53163	61782	80517	53443	74695	56462	73698	AGCCATAGGGGTTTGTTTGTTTGTATGTTTTTTAATTGACAAGTTATGCATCCATACAGTACACAATCTCTTCTCTCTACAGATGACTGCCATGGAGGAGTCACAGTCGGATATCAGCCTCGAGCTCCCTCTGA{T}|GCCAGGAGACATTTTCAGGCTTATGGAAACTGTGAGTGGATCTTTTTGGGGCCCTTAAGATACATCCCGCCATACCTGTATCCTCCCCTTGCCTGAGAGAA
Pik3r1	WT	20812	76537	21035	46414	0	34338	16164	9562	10417	51043	24989	10386	13698	AGTGTGTGGTTACTCAAAGTTGAAAAGTAAGTATGGTCTTATACTGTGTTCATTTTAGGGAAGAAGTGAATGAAAAACTCCGAGACACTGCTGATGGGACCTTTT|TGGTACGAGACGCATCTACTAAAATGCACGGCGATTACACTCTTACACTAAGGTGAGCCAGGAAGTCAGCTGTAATTGCGATGTCTCAGTTGTCATGA
Pik3r1	Ins 1 T	109584	30962	94980	54323	0	102102	81078	97506	116614	92272	141202	101725	116353	AGTGTGTGGTTACTCAAAGTTGAAAAGTAAGTATGGTCTTATACTGTGTTCATTTTAGGGAAGAAGTGAATGAAAAACTCCGAGACACTGCTGATGGGACCTTTT|{T}TGGTACGAGACGCATCTACTAAAATGCACGGCGATTACACTCTTACACTAAGGTGAGCCAGGAAGTCAGCTGTAATTGCGATGTCTCAGTTGTCATGA
Pik3r1	Del 1|0	35617	17162	49484	32042	0	44838	39328	49268	56556	34887	67192	49698	56028	AGTGTGTGGTTACTCAAAGTTGAAAAGTAAGTATGGTCTTATACTGTGTTCATTTTAGGGAAGAAGTGAATGAAAAACTCCGAGACACTGCTGATGGGACCTTT-|TGGTACGAGACGCATCTACTAAAATGCACGGCGATTACACTCTTACACTAAGGTGAGCCAGGAAGTCAGCTGTAATTGCGATGTCTCAGTTGTCATGA
Pten	WT	154	8658	478	1580	574	103	9062	181	231	119	160	4249	291	CTTTTGTCTCCCTCCTCCCTCTGCCCCCTGGGCCTATCAGGGAGTCACAATTCCCAGTCAGAGGCGCTATGTATATTATTATAGCTACCTGCTAAAAAATCACCTGGATTACAGAC|CCGTGGCACTGCTGTTTCACAAGATGATGTTTGAAACTATTCCAATGTTCAGTGGCGGAACTTGCAGTAAGTGCTCTAAATTCTTAGCTGTCTGTGTGTCGGA
Pten	Del 4|0	39555	19898	30465	22226	13450	72381	51799	99616	121063	106890	107060	78761	121466	CTTTTGTCTCCCTCCTCCCTCTGCCCCCTGGGCCTATCAGGGAGTCACAATTCCCAGTCAGAGGCGCTATGTATATTATTATAGCTACCTGCTAAAAAATCACCTGGATTAC----|CCGTGGCACTGCTGTTTCACAAGATGATGTTTGAAACTATTCCAATGTTCAGTGGCGGAACTTGCAGTAAGTGCTCTAAATTCTTAGCTGTCTGTGTGTCGGA
Pten	Del 1|0	35816	12780	7761	6131	2954	37457	46282	24108	34314	35189	23641	52599	44872	CTTTTGTCTCCCTCCTCCCTCTGCCCCCTGGGCCTATCAGGGAGTCACAATTCCCAGTCAGAGGCGCTATGTATATTATTATAGCTACCTGCTAAAAAATCACCTGGATTACAGA-|CCGTGGCACTGCTGTTTCACAAGATGATGTTTGAAACTATTCCAATGTTCAGTGGCGGAACTTGCAGTAAGTGCTCTAAATTCTTAGCTGTCTGTGTGTCGGA
Pten	Del 9|1	785	1422	68	97	139	497	10363	458	1374	142	297	15297	5879	CTTTTGTCTCCCTCCTCCCTCTGCCCCCTGGGCCTATCAGGGAGTCACAATTCCCAGTCAGAGGCGCTATGTATATTATTATAGCTACCTGCTAAAAAATCACCTGG--------- | -CGTGGCACTGCTGTTTCACAAGATGATGTTTGAAACTATTCCAATGTTCAGTGGCGGAACTTGCAGTAAGTGCTCTAAATTCTTAGCTGTCTGTGTGTCGGA
Rasa1	WT	211	52413	7913	18979	8108	647	418	1104	4165	349	513	457	569	AGCGTGCCGGGTCAAGTTACCCGCGGCCCTGCCGGTGGCAGCCGCCCCGTGTCCCGGGCTGGCGGACGCCGACT|TGGTTGCGGCCCTCGGTGGCGGAGCCGCGTCGGGGTCCGGGTTCCTGGGGACCGGGCCGGTGGCCGGTGTCTTGGGGGGCGCCGCGCTGACCGGCAGTGCTGCTG
Rasa1	Del 1|0	43689	22737	40997	26845	25812	4697	42287	48307	55348	43350	6697	60539	65661	AGCGTGCCGGGTCAAGTTACCCGCGGCCCTGCCGGTGGCAGCCGCCCCGTGTCCCGGGCTGGCGGACGCCGACT|TGGTTGCGGCCCTCGGTGGCGGAGCCGCGTCGGGGTCCGGGTTCCTGGGGACCGGGCCGGTGGCCGGTGTCTTGGGGGGCGCCGCGCTGACCGGCAGTGCTGCTG
Rasa1	Ins 1A	53475	14688	27098	14103	17445	124788	73301	81797	74690	100709	136606	107232	103499	AGCGTGCCGGGTCAAGTTACCCGCGGCCCTGCCGGTGGCAGCCGCCCCGTGTCCCGGGCTGGCGGACGCCGACT|{A}TGGTTGCGGCCCTCGGTGGCGGAGCCGCGTCGGGGTCCGGGTTCCTGGGGACCGGGCCGGTGGCCGGTGTCTTGGGGGGCGCCGCGCTGACCGGCAGTGCTGCTG
Rb1	WT	1208	90265	15157	49565	44458	1133	1104	1228	842	769	1236	1448	1258	TACAGAAACAGCTGCAATCCCCATTAATGGTTCACCTCGAACACCCAGAAGAGGTCAGAACAGGAGCGCTCGGATAGCAAAACAACTAGAAAATGAT|ACGAGGATTATCGAGGTTCTCTGTAAAGAACACGAGTGTAATATAGATGAGGTAATTTCTCTTACACTTTATTTAAAACAGCTGAAGTAGATATATATGCTAAGTCTGCCTGTCA
Rb1	Del 2|0	35547	11382	25577	42161	40644	9324	8413	14298	7719	36933	40025	8155	7764	TACAGAAACAGCTGCAATCCCCATTAATGGTTCACCTCGAACACCCAGAAGAGGTCAGAACAGGAGCGCTCGGATAGCAAAACAACTAGAAAAT--T|ACGAGGATTATCGAGGTTCTCTGTAAAGAACACGAGTGTAATATAGATGAGGTAATTTCTCTTACACTTTATTTAAAACAGCTGAAGTAGATATATATGCTAAGTCTGCCTGTCA
Rb1	Ins 1 T	23099	19567	34303	31494	69810	519	524	16117	32407	44179	79376	63913	94166	TACAGAAACAGCTGCAATCCCCATTAATGGTTCACCTCGAACACCCAGAAGAGGTCAGAACAGGAGCGCTCGGATAGCAAAACAACTAGAAAATGAT{T}|ACGAGGATTATCGAGGTTCTCTGTAAAGAACACGAGTGTAATATAGATGAGGTAATTTCTCTTACACTTTATTTAAAACAGCTGAAGTAGATATATATGCTAAGTCTGCCTGTCA
Rb1	Del 1|0	42782	56121	115280	77120	172717	91493	71544	61102	83068	2430	3753	4724	4276	TACAGAAACAGCTGCAATCCCCATTAATGGTTCACCTCGAACACCCAGAAGAGGTCAGAACAGGAGCGCTCGGATAGCAAAACAACTAGAAAATG-T|ACGAGGATTATCGAGGTTCTCTGTAAAGAACACGAGTGTAATATAGATGAGGTAATTTCTCTTACACTTTATTTAAAACAGCTGAAGTAGATATATATGCTAAGTCTGCCTGTCA
Rb1	Del 6|21	4446	11246	25577	12993	25522	4315	2899	7795	4951	4768	6641	6521	6145	TACAGAAACAGCTGCAATCCCCATTAATGGTTCACCTCGAACACCCAGAAGAGGTCAGAACAGGAGCGCTCGGATAGCAAAACAACTAGAA------|---------------------TGTAAAGAACACGAGTGTAATATAGATGAGGTAATTTCTCTTACACTTTATTTAAAACAGCTGAAGTAGATATATATGCTAAGTCTGCCTGTCA
Rb1	Del 1|2	6607	10258	23374	11845	20986	6579	5688	11940	5994	29951	30597	47907	41074	TACAGAAACAGCTGCAATCCCCATTAATGGTTCACCTCGAACACCCAGAAGAGGTCAGAACAGGAGCGCTCGGATAGCAAAACAACTAGAAAATGA-|--GAGGATTATCGAGGTTCTCTGTAAAGAACACGAGTGTAATATAGATGAGGTAATTTCTCTTACACTTTATTTAAAACAGCTGAAGTAGATATATATGCTAAGTCTGCCTGTCA
Rps6ka3	WT	44560	44472	31771	30133	25715	79143	78146	62306	102100	76139	93511	119522	104160	GAGAGTCATTCTGGGCTAACAATGGGTTGTCTCTATATTTACCTTAACAGGAAGAAGGCAGTATCAAAGAAATTGCAATCACACATCATGTGAAGGAAGGACATG|AAAAGGCAGATCCTTCCCAGTTTGAACTTTTAAAAGTATTAGGGCAGGGATCATTTGGAAAGGTAAGTCATAGTTGTTTGC
Runx3	WT	3230	22344	12751	8648	9255	23451	26774	27503	34573	41706	26594	48887	44313	GACAGCCCCAACTTCCTCTGCTCCGTGCTGCCCTCGCACTGGCGCTGCAACAAGACGCTGCCGGTCGCCT|TCAAGGTGAGTGCAGGGGCCCGAGCCGGGAGGACACCGGGGAACCTGGGCGCCCCCATTTGCAGGAGCCCATACCGGGGAGGACTTGGGGAGCACCTAGAAGTAGGACATGAAAGGGGATGTCACCCAG
Runx3	Del 1|0	298	1398	1141	794	740	1819	2829	2013	2477	4154	2258	3888	3849	GACAGCCCCAACTTCCTCTGCTCCGTGCTGCCCTCGCACTGGCGCTGCAACAAGACGCTGCCGGTCGCC-|TCAAGGTGAGTGCAGGGGCCCGAGCCGGGAGGACACCGGGGAACCTGGGCGCCCCCATTTGCAGGAGCCCATACCGGGGAGGACTTGGGGAGCACCTAGAAGTAGGACATGAAAGGGGATGTCACCCAG
Setd5	WT	50239	79484	75961	53522	66769	73645	73596	70189	101944	76120	83536	29216	35207	GCCCTGGTTTTAGTAGGTAATCGCTCAGAAGGAAAGTTTTAACTCCTGGGAAAGCCCCTTCTATGCTAATTTATTCTATCGGGCGCCTTTGCCTTTCTCATTCTTAGGAATAAGGATCTTTCTCCTGTG|TACTGATGCTGCAGCCCGCCCTGCTGGCCTGGGTCAGGGGTGCGTGGATGACCTGCATTTTCTGCTTTCTCATGTTACTTGTGTAACGTCTTCACC
Smad4	WT	1796	148193	174427	153289	77521	3382	2432	3967	2728	4154	7981	27817	35287	AGTACGTTCACGACTTTGAAGGACAGCCGTCCTTACCCACTGAAGGACATTCGATTCAAACCATCCAACACCCGCCAAGTAATCGCGCATCAACGGAGACGTACAGCG|CCCCGGCTCTGTTAGCCCCGGCAGAGTCTAACGCCACCAGCACCACCAACTTCCCCAACATTCCTGTGGCTTCCACAAGTGAGTGTTGCAGTCAGATCGAGTCGAAAGTTTTC
Smad4	Del 2|0	2462	2967	518	595	1501	3523	3915	2729	3904	2481	6083	19693	25739	AGTACGTTCACGACTTTGAAGGACAGCCGTCCTTACCCACTGAAGGACATTCGATTCAAACCATCCAACACCCGCCAAGTAATCGCGCATCAACGGAGACGTACAG--|CCCCGGCTCTGTTAGCCCCGGCAGAGTCTAACGCCACCAGCACCACCAACTTCCCCAACATTCCTGTGGCTTCCACAAGTGAGTGTTGCAGTCAGATCGAGTCGAAAGTTTTC
Smad4	Del 1|0	2403	3092	418	691	1496	3531	4020	2820	4064	2513	6372	20788	27702	AGTACGTTCACGACTTTGAAGGACAGCCGTCCTTACCCACTGAAGGACATTCGATTCAAACCATCCAACACCCGCCAAGTAATCGCGCATCAACGGAGACGTACAGC-|CCCCGGCTCTGTTAGCCCCGGCAGAGTCTAACGCCACCAGCACCACCAACTTCCCCAACATTCCTGTGGCTTCCACAAGTGAGTGTTGCAGTCAGATCGAGTCGAAAGTTTTC
Tet2	WT	38697	57072	37069	36589	77415	54573	14133	52540	62078	40365	58067	64859	83742	CACCGTCACAATCACTTCTTGCTCCCCGTCTTGTTCTTCAGCCTCCTTTAGAAGGAAAAGGCGCTCTAAATGATGTAGCTTTGGAAGAACACCATGACTACCCCAAC|CGAAGCAACCGAACTCTTTTAAGGGAAGGGAAAATAGACCATCAACCCAAGACATCATCTAGCCAGAGTCTGAATCCATCTGTACATACACCCAACCCCCCCTTGATGCTTCCAGAACAGCAT
Tet2	Del 2|4	18264	9625	24984	12179	51771	38818	56691	36894	53467	30038	40926	53878	58859	CACCGTCACAATCACTTCTTGCTCCCCGTCTTGTTCTTCAGCCTCCTTTAGAAGGAAAAGGCGCTCTAAATGATGTAGCTTTGGAAGAACACCATGACTACCCCA--|----GCAACCGAACTCTTTTAAGGGAAGGGAAAATAGACCATCAACCCAAGACATCATCTAGCCAGAGTCTGAATCCATCTGTACATACACCCAACCCCCCCTTGATGCTTCCAGAACAGCAT
Tsc1	WT	72282	126687	123412	111943	187999	113137	95468	117173	161693	120397	81240	164700	208210	TACTCTGCGACACAGAACATGCCCAGCATTTTCACTGTGCTTCCATTTCAGGAAGAAAGAGCAGATTCCTCAAGGCCTTACCTTCACAGACAGTCAAACGACCGAGG|ATTAGGTAAACTCCCTGGGTAATGATGGGCCTTGCTTGCCTCTTGGCATTGAACTCTGTAGCTTAAAAGCTAAGCTGGGTGGAAGAAGGATTTTCTGGGATAGCACCTATGCT
Tsc2	WT	1	68410	16449	25009	23241	12	11	18	14	3	22	25	39	CTAAGGTCCCTGGAGGCTACACCCTTCTCACTGTCCCCTTTTTGTCATGGCAGCATGCAGTGGAGGCACTTTGGAAGGCTGTCTCAGACTTGCTACAGCCAGAGCGGCCAC|CAGAGGCCCGGCATGCAGTTCTCACCTTATTGAAGGCCATTGTACAGGGACAGGTAAGGGGTGGAGCTGTGTGAGCCTGTGGGATGAAGGCAGACCGTCACCGTTTGAGCTCCTGC
Tsc2	Del 1|0	797	15354	42496	16295	41798	2903	3410	1797	6180	2989	6821	7151	12959	CTAAGGTCCCTGGAGGCTACACCCTTCTCACTGTCCCCTTTTTGTCATGGCAGCATGCAGTGGAGGCACTTTGGAAGGCTGTCTCAGACTTGCTACAGCCAGAGCGGCCA-|CAGAGGCCCGGCATGCAGTTCTCACCTTATTGAAGGCCATTGTACAGGGACAGGTAAGGGGTGGAGCTGTGTGAGCCTGTGGGATGAAGGCAGACCGTCACCGTTTGAGCTCCTGC
Tsc2	Del 3|0	1432	28765	87418	29819	85051	8242	9952	2131	6366	4417	12684	14600	26417	CTAAGGTCCCTGGAGGCTACACCCTTCTCACTGTCCCCTTTTTGTCATGGCAGCATGCAGTGGAGGCACTTTGGAAGGCTGTCTCAGACTTGCTACAGCCAGAGCGGC---|CAGAGGCCCGGCATGCAGTTCTCACCTTATTGAAGGCCATTGTACAGGGACAGGTAAGGGGTGGAGCTGTGTGAGCCTGTGGGATGAAGGCAGACCGTCACCGTTTGAGCTCCTGC
Tsc2	Del 0|3	770	14056	43809	15915	44261	2658	3375	965	12762	2256	6492	7012	13534	CTAAGGTCCCTGGAGGCTACACCCTTCTCACTGTCCCCTTTTTGTCATGGCAGCATGCAGTGGAGGCACTTTGGAAGGCTGTCTCAGACTTGCTACAGCCAGAGCGGCCAC|---AGGCCCGGCATGCAGTTCTCACCTTATTGAAGGCCATTGTACAGGGACAGGTAAGGGGTGGAGCTGTGTGAGCCTGTGGGATGAAGGCAGACCGTCACCGTTTGAGCTCCTGC
Tsc2	Del 2|0	121	326	598	339	403	431	567	824	630	837	1017	806	1401	CTAAGGTCCCTGGAGGCTACACCCTTCTCACTGTCCCCTTTTTGTCATGGCAGCATGCAGTGGAGGCACTTTGGAAGGCTGTCTCAGACTTGCTACAGCCAGAGCGGCC--|CAGAGGCCCGGCATGCAGTTCTCACCTTATTGAAGGCCATTGTACAGGGACAGGTAAGGGGTGGAGCTGTGTGAGCCTGTGGGATGAAGGCAGACCGTCACCGTTTGAGCTCCTGC
Tsc2	Del 1|0	3	54	147	60	170	13	18	886	21	12	19	20	40	CTAAGGTCCCTGGAGGCTACACCCTTCTCACTGTCCCCTTTTTGTCATGGCAGCATGCAGTGGAGGCACTTTGGAAGGCTGTCTCAGACTTGCTACAGCCAGAGCGGCC-C|CAGAGGCCCGGCATGCAGTTCTCACCTTATTGAAGGCCATTGTACAGGGACAGGTAAGGGGTGGAGCTGTGTGAGCCTGTGGGATGAAGGCAGACCGTCACCGTTTGAGCTCCTGC

## Sheet: MF
Target Gene	Mutation Type	Parental	SG1	SG2	SG4	SG5	SG1-1	SG1-2	SG2-5	SG2-6	SG4-1	SG4-3	SG5-1	SG5-2	Reference
Apc	WT	2.4603	68.8184	11.8033	35.3184	17.5472	2.79398	3.71842	2.83355	3.16895	2.31123	2.91024	1.4941	1.31262	CATGGCATAAAGCAGTTACTACATAAGAACTTGTTTCTGTTTAGAATTTAACTTAGATAGTAATTTCCCCGGAGTGAAACTACGCTCAAAAATGTCCCTTCGCTCCTACG|GAAGTCGGGAAGGATCTGTATCCAGCCGTTCAGGAGAATGCAGTCCTGTCCCCATGGGGTCATTCCCAAGAAGAACATTTGTAAATGGAAGCAGAGAGAGTACTGGGTATC
Apc	Del 1|0	24.7444	16.2652	31.377	22.5488	35.4946	34.128	31.4123	33.588	6.36505	33.1784	34.409	32.5272	32.4468	CATGGCATAAAGCAGTTACTACATAAGAACTTGTTTCTGTTTAGAATTTAACTTAGATAGTAATTTCCCCGGAGTGAAACTACGCTCAAAAATGTCCCTTCGCTCCTAC-|GAAGTCGGGAAGGATCTGTATCCAGCCGTTCAGGAGAATGCAGTCCTGTCCCCATGGGGTCATTCCCAAGAAGAACATTTGTAAATGGAAGCAGAGAGAGTACTGGGTATC
Apc	Ins 1 A	72.7953	14.9164	56.8197	42.1328	46.9582	63.078	64.8693	63.5784	90.466	64.5104	62.6807	65.9787	66.2406	CATGGCATAAAGCAGTTACTACATAAGAACTTGTTTCTGTTTAGAATTTAACTTAGATAGTAATTTCCCCGGAGTGAAACTACGCTCAAAAATGTCCCTTCGCTCCTACG|{A}GAAGTCGGGAAGGATCTGTATCCAGCCGTTCAGGAGAATGCAGTCCTGTCCCCATGGGGTCATTCCCAAGAAGAACATTTGTAAATGGAAGCAGAGAGAGTACTGGGTATC
Apob	WT	0.0395797	2.50782	6.66812	24.2949	16.5976	0.0178166	0.0668871	0.0604721	0.0398228	0.00809343	0.0470271	0.0456864	0.0443341	TCCGAAGACCCTGTAGAGCAAGCAGCAGGGGCTAGGCCCGTGGCCAGGCCACAGCCAGGAAGCCACCCCACCATCCATCCGCCATGGGCCCACGAAAGCCTGCCCTGC|GGACGCCGTTACTGCTGCTGTTCCTGCTACTGTTCTTGGACACCAGCGTCTGGGCTCGTGAGTTAGGGTGGAAGCCTGGGAGAAAGCCA
Apob	Del 0|1	57.6458	54.4976	48.5927	38.9871	37.3754	46.5359	59.2744	55.2913	53.036	64.6956	59.8463	82.8634	57.658	TCCGAAGACCCTGTAGAGCAAGCAGCAGGGGCTAGGCCCGTGGCCAGGCCACAGCCAGGAAGCCACCCCACCATCCATCCGCCATGGGCCCACGAAAGCCTGCCCTGC|-GACGCCGTTACTGCTGCTGTTCCTGCTACTGTTCTTGGACACCAGCGTCTGGGCTCGTGAGTTAGGGTGGAAGCCTGGGAGAAAGCCA
Apob	Ins 1 G	21.4641	0.639593	17.0837	13.5361	29.9599	30.312	19.1297	27.3313	23.5631	0.565731	0.775948	0.844666	0.788162	TCCGAAGACCCTGTAGAGCAAGCAGCAGGGGCTAGGCCCGTGGCCAGGCCACAGCCAGGAAGCCACCCCACCATCCATCCGCCATGGGCCCACGAAAGCCTGCCCTGC|{G}GGACGCCGTTACTGCTGCTGTTCCTGCTACTGTTCTTGGACACCAGCGTCTGGGCTCGTGAGTTAGGGTGGAAGCCTGGGAGAAAGCCA
Apob	Del 19|91	16.762	0.579327	12.4251	13.4073	15.1741	16.3236	18.5921	15.1608	17.0282	1.00439	1.67588	1.88908	1.52805	TCCGAAGACCCTGTAGAGCAAGCAGCAGGGGCTAGGCCCGTGGCCAGGCCACAGCCAGGAAGCCACCCCACCATCCATCCGCCATGGGC------------------- | -------------------------------------------------------------------------------------------TGGGAGAAAGCCA
Apob	Del 0|6	1.44664	13.8319	4.87394	3.46457	0.362366	2.33635	1.02684	0.759029	2.18926	33.7019	30.1604	0.0764981	28.9531	TCCGAAGACCCTGTAGAGCAAGCAGCAGGGGCTAGGCCCGTGGCCAGGCCACAGCCAGGAAGCCACCCCACCATCCATCCGCCATGGGCCCACGAAAGCCTGCCCTGC|------CGTTACTGCTGCTGTTCCTGCTACTGTTCTTGGACACCAGCGTCTGGGCTCGTGAGTTAGGGTGGAAGCCTGGGAGAAAGCCA
Apob	Del 0|9	2.64194	27.9438	10.3563	6.30995	0.530607	4.47435	1.91	1.39711	4.14356	0.0242803	7.49442	14.2807	11.0284	TCCGAAGACCCTGTAGAGCAAGCAGCAGGGGCTAGGCCCGTGGCCAGGCCACAGCCAGGAAGCCACCCCACCATCCATCCGCCATGGGCCCACGAAAGCCTGCCCTGC|G---------ACTGCTGCTGTTCCTGCTACTGTTCTTGGACACCAGCGTCTGGGCTCGTGAGTTAGGGTGGAAGCCTGGGAGAAAGCCA
Arid1a	Del 11|16	74.1939	36.8608	41.1078	42.7649	40.6608	30.2697	24.5655	39.5967	40.6283	59.7058	40.1742	40.8374	41.7412	TATGCAGAGGAACCCCCAGATGCCCCAGTACACTTCCCCTCAGCCTGGCTCGGCCTTATCCCCACGTCAGCCGTCTGGAGGACAG----------- | ----------------CAGAACTCCATGGGGAGCTACGGCCCCCAGGGCAGTCAGTATGGCCCACAAGGTAAGTGTGCTACCCCTTTAGAAGGAAAGAGAGGTACTGTGTTAACGGCTG
Arid1a	Del 24|25	25.8061	63.1392	58.8922	57.2351	59.3392	69.7303	75.4345	60.4033	59.3717	40.2942	59.8258	59.1626	58.2588	TATGCAGAGGAACCCCCAGATGCCCCAGTACACTTCCCCTCAGCCTGGCTCGGCCTTATCCCCACGTCAGCC------------------------ | -------------------------ATGGGGAGCTACGGCCCCCAGGGCAGTCAGTATGGCCCACAAGGTAAGTGTGCTACCCCTTTAGAAGGAAAGAGAGGTACTGTGTTAACGGCTG
Arid1b	WT	0.0258131	5.60663	17.2299	0.852306	16.9744	0.0653925	1.5249	0	1.40637	0.0541113	0.0261981	0.878421	0.473238	CTTGGGCAAGGACCTAGGCGCCCAGTACGCCGCTGCCAGCCCGGCCTGGGCGGCCGCGCAACAAAGGAGTCACCCGGCGATGAGCCCCGGCACCCCCG|GACCGACCATGGGCAGATCCCAGGTAACCCCCGCGCCCGGCCGGGCCTGCTTCCGCCCGGGCCTCGCGCCGCGAGCCCGACTTTCTTTCTTCGCCGGGTACTTTTCCCGGCGGTTG
Arid1b	Del 23|24	99.9742	94.3934	82.7701	99.1477	83.0256	99.9346	98.4751	100	98.5936	99.9459	99.9738	99.1216	99.5268	CTTGGGCAAGGACCTAGGCGCCCAGTACGCCGCTGCCAGCCCGGCCTGGGCGGCCGCGCAACAAAGGAGTCACCC----------------------- | ------------------------TAACCCCCGCGCCCGGCCGGGCCTGCTTCCGCCCGGGCCTCGCGCCGCGAGCCCGACTTTCTTTCTTCGCCGGGTACTTTTCCCGGCGGTTG
Arid2	WT	0.0605736	50.0339	14.1794	32.2705	15.7201	0.180405	0.111116	0.233493	0.17385	0.065366	0.0663383	0.119728	0.0687793	CAGCTTAACATAGGGCTTCCTGTGGTATATAATGTCTTTATTCCTCTCTCTCTCTCTTTTAGGCTAAATGCTCATTTTGAAGTAAATCCAGAC|TGTTCCGTCTCTCGGGCAGAAATGTATTCAGAGTACCTCTCAACTTGCAGTAAATTAGCTCGCGGTGGCATCCTCACATCAACTGGGTTTTATAAGTGTCTTAGGTAACTCGCACAGCTC
Arid2	Ins 1 T	38.4572	23.9914	36.7457	25.0642	27.9957	38.103	41.0374	53.3351	52.2469	28.7032	36.5129	52.3595	51.8923	CAGCTTAACATAGGGCTTCCTGTGGTATATAATGTCTTTATTCCTCTCTCTCTCTCTTTTAGGCTAAATGCTCATTTTGAAGTAAATCCAGAC|{T}TGTTCCGTCTCTCGGGCAGAAATGTATTCAGAGTACCTCTCAACTTGCAGTAAATTAGCTCGCGGTGGCATCCTCACATCAACTGGGTTTTATAAGTGTCTTAGGTAACTCGCACAGCTC
Arid2	Ins 2 AG	31.1045	9.77379	8.30764	10.8442	29.1486	26.5586	28.7865	2.64026	2.69304	48.0893	31.1578	1.94727	1.82265	CAGCTTAACATAGGGCTTCCTGTGGTATATAATGTCTTTATTCCTCTCTCTCTCTCTTTTAGGCTAAATGCTCATTTTGAAGTAAATCCAGAC|{AG}TGTTCCGTCTCTCGGGCAGAAATGTATTCAGAGTACCTCTCAACTTGCAGTAAATTAGCTCGCGGTGGCATCCTCACATCAACTGGGTTTTATAAGTGTCTTAGGTAACTCGCACAGCTC
Arid2	Del 0|2	27.5633	10.1529	39.23	30.0289	26.4789	31.3273	26.9153	40.5514	42.6196	21.3144	29.8452	41.8483	42.3612	CAGCTTAACATAGGGCTTCCTGTGGTATATAATGTCTTTATTCCTCTCTCTCTCTCTTTTAGGCTAAATGCTCATTTTGAAGTAAATCCAGAC|--TTCCGTCTCTCGGGCAGAAATGTATTCAGAGTACCTCTCAACTTGCAGTAAATTAGCTCGCGGTGGCATCCTCACATCAACTGGGTTTTATAAGTGTCTTAGGTAACTCGCACAGCTC
Arid2	Del 0|3	2.81434	6.04805	1.53731	1.79221	0.656776	3.8306	3.14977	3.23971	2.26661	1.82774	2.41782	3.72512	3.85508	CAGCTTAACATAGGGCTTCCTGTGGTATATAATGTCTTTATTCCTCTCTCTCTCTCTTTTAGGCTAAATGCTCATTTTGAAGTAAATCCAGAC|---TCCGTCTCTCGGGCAGAAATGTATTCAGAGTACCTCTCAACTTGCAGTAAATTAGCTCGCGGTGGCATCCTCACATCAACTGGGTTTTATAAGTGTCTTAGGTAACTCGCACAGCTC
Atm	WT	100	100	100	100	100	100	100	100	100	100	100	100	100	TCTGTCATTCATTGGTGAAGAAATCAAAGTAGAAAAACATTGAGCGACTGCTCTAAAGTCCTATTATTCCCATTTTCTTAAACATCATGTTTTTCCTTTCTGCAGGTTTTAGAGAAAGTCTCCGAATC|GTTTGGATGTAGAAGTTTAGAAGACTTCATGATTTCTCACCTAGACTACCTGGTTTTGGAATGGCTGAACCTTCAAGATACTG
Axin1	WT	0.118994	54.0103	9.06964	29.2931	11.6997	0.0559086	0.0438919	0.313774	0.203514	0.0350201	0.0262467	0.0844179	0.364276	GTTCTGAGGCCCGTCATCTGGTCCCTGCCTCAGCCAATAGGCGGCAGGAGCCCGAGCTGCAGCCTAGAGTCACGCTTCTGCCTCCCAGCCACACAGTGGCCAAGAGCAGG|GACCGGCTTCCTAGAGTGGCTGAAAGTGCTCGGACGGACAGCCAAGCCCATCATGGCGGACAGCGGGACAGTGGGTCGTGATCAGGCACTTGGAGCCAGGCAGGTGAGGTAA
Axin1	Del 1|0	99.881	45.9897	90.9304	70.7069	88.3003	99.9441	99.9561	99.6862	99.7965	99.965	99.9738	99.9156	99.6357	GTTCTGAGGCCCGTCATCTGGTCCCTGCCTCAGCCAATAGGCGGCAGGAGCCCGAGCTGCAGCCTAGAGTCACGCTTCTGCCTCCCAGCCACACAGTGGCCAAGAGCAG-|GACCGGCTTCCTAGAGTGGCTGAAAGTGCTCGGACGGACAGCCAAGCCCATCATGGCGGACAGCGGGACAGTGGGTCGTGATCAGGCACTTGGAGCCAGGCAGGTGAGGTAA
Cdkn2a	WT	70.3991	52.7383	8.66743	29.4058	11.7546	5.7232	0.756229	0.51336	0.476086	9.21707	0.426594	0.675243	0.431875	CAGGTGATGATGATGGGCAACGTTCACGTAGCAGCTCTTCTGCTCAACTACGGTGCAGATTCGAACTGCGAGGACCCCACTACCTTCTCCCGCCC|GGTGCACGACGCAGCGCGGGAAGGCTTCCTGGACACGCTGGTGGTGCTGCACGGGTCAGGGGCTCGGCTGGATGTGCGCGATGCCTGGGGTCGCCTGCCGCTCGACTTGGCCCAAGA
Cdkn2a	Del 0|1	1.36733	36.4222	68.0467	63.2466	65.8083	93.0346	98.3841	80.7903	76.2555	71.9299	78.6482	80.3616	77.2254	CAGGTGATGATGATGGGCAACGTTCACGTAGCAGCTCTTCTGCTCAACTACGGTGCAGATTCGAACTGCGAGGACCCCACTACCTTCTCCCGCCC|-GTGCACGACGCAGCGCGGGAAGGCTTCCTGGACACGCTGGTGGTGCTGCACGGGTCAGGGGCTCGGCTGGATGTGCGCGATGCCTGGGGTCGCCTGCCGCTCGACTTGGCCCAAGA
Cdkn2a	Ins 1 G	28.2336	10.8395	23.2859	7.34753	22.4371	1.2422	0.859713	18.6963	23.2685	18.853	20.9252	18.9632	22.3427	CAGGTGATGATGATGGGCAACGTTCACGTAGCAGCTCTTCTGCTCAACTACGGTGCAGATTCGAACTGCGAGGACCCCACTACCTTCTCCCGCCC|{G}GGTGCACGACGCAGCGCGGGAAGGCTTCCTGGACACGCTGGTGGTGCTGCACGGGTCAGGGGCTCGGCTGGATGTGCGCGATGCCTGGGGTCGCCTGCCGCTCGACTTGGCCCAAGA
Chd1	WT	0.124737	52.145	9.69729	29.2095	13.2409	0.0384841	0.0684024	0.128313	0.112893	0.0599686	0.082563	0.0511858	0.180872	AGCGACTCTGATTCTGGCTCTGACTCAGGAAGTCAATCAGAGTCTGAATCAGACACATCCCGAGAGAACAAGGTTCAAGCAAAACCACCAAAAGT|CGACGGAGCCGAGGTAAGTTAGTGCAATTGAACTGGCTTAAGACAGAAGTTAAATCTTATAACTGACTGGACAGTGTCATGGCCTGGGCATATAGCGCAGCAGTACAGCAC
Chd1	Ins 1 T	78.2139	26.1217	45.4945	39.4677	45.0418	42.9523	43.6236	54.0471	52.5432	53.0607	53.2969	52.9571	52.2904	AGCGACTCTGATTCTGGCTCTGACTCAGGAAGTCAATCAGAGTCTGAATCAGACACATCCCGAGAGAACAAGGTTCAAGCAAAACCACCAAAAGT{T}|CGACGGAGCCGAGGTAAGTTAGTGCAATTGAACTGGCTTAAGACAGAAGTTAAATCTTATAACTGACTGGACAGTGTCATGGCCTGGGCATATAGCGCAGCAGTACAGCAC
Chd1	Del 0|2	21.6613	21.7332	44.8082	31.3228	41.7173	57.0092	56.308	45.8246	47.3439	46.8793	46.6206	46.9917	47.5287	AGCGACTCTGATTCTGGCTCTGACTCAGGAAGTCAATCAGAGTCTGAATCAGACACATCCCGAGAGAACAAGGTTCAAGCAAAACCACCAAAAGT|--ACGGAGCCGAGGTAAGTTAGTGCAATTGAACTGGCTTAAGACAGAAGTTAAATCTTATAACTGACTGGACAGTGTCATGGCCTGGGCATATAGCGCAGCAGTACAGCAC
Col1a1	WT	0.936544	68.2383	16.1127	45.3761	21.4371	0.686233	1.67204	1.11702	0.696579	0.612846	1.56642	0.729272	0.702794	AGTCCAAGACCTTCTCCCAGCATGAAGAGGATGCTAAACCCGTGGTAATAAGGCCAAGGCTGTGGCCCTGATGCGTCTGTGACTTCTCTCCACTTAGGGTCCTTCCGGTGA|ACGTGGTGCTCCCGGACCTGCTGGTCCCAAAGGTTCTCCTGGTGAAGCTGGTCGCCCCGGTGAAGCTGGTCTCCCTGGTGCCAAGGTGAGAAGATCCTCTGTCCTGTATGG
Col1a1	Del 1|0	3.08365	2.61764	0.486556	0.81244	0.457166	2.45593	5.82507	2.55454	2.32086	97.0409	91.9435	96.6619	96.3603	AGTCCAAGACCTTCTCCCAGCATGAAGAGGATGCTAAACCCGTGGTAATAAGGCCAAGGCTGTGGCCCTGATGCGTCTGTGACTTCTCTCCACTTAGGGTCCTTCCGGTG-|ACGTGGTGCTCCCGGACCTGCTGGTCCCAAAGGTTCTCCTGGTGAAGCTGGTCGCCCCGGTGAAGCTGGTCTCCCTGGTGCCAAGGTGAGAAGATCCTCTGTCCTGTATGG
Col1a1	Ins 1 T	95.9798	29.1441	83.4008	53.8115	78.1057	96.8578	92.5029	96.3284	96.9826	2.34629	6.49005	2.60882	2.93692	AGTCCAAGACCTTCTCCCAGCATGAAGAGGATGCTAAACCCGTGGTAATAAGGCCAAGGCTGTGGCCCTGATGCGTCTGTGACTTCTCTCCACTTAGGGTCCTTCCGGTGA{T}|ACGTGGTGCTCCCGGACCTGCTGGTCCCAAAGGTTCTCCTGGTGAAGCTGGTCGCCCCGGTGAAGCTGGTCTCCCTGGTGCCAAGGTGAGAAGATCCTCTGTCCTGTATGG
Dlc1	WT	0.602997	54.0749	11.9416	27.7778	12.8215	0.527311	0.702592	0.560707	0.369226	0.427805	0.445128	0.363268	0.517725	ACGAAAGCATGCTGACAGACCTCAGCGAGCACCAGGAGGTGGCCTCTGTCCGAAGCCTCAGCAGCACCAGCAGCAGCGTCCCCACCCACGCAGCCCACAGTGGAGATGCCACTACGCCCCGAAC|CAATTCCGTCATCAGCGTCTGCTCCTCCGGACACTTTGTAGGCAATGATGACTCTTTTTCCAGCCTGCCGTCTCCCAAGGAACTGTCCAGCTTCAGT
Dlc1	Del 1|0	79.6687	34.5155	59.198	54.3301	65.5068	75.4353	81.0437	73.6216	68.6559	81.0783	82.5301	69.7559	71.1536	ACGAAAGCATGCTGACAGACCTCAGCGAGCACCAGGAGGTGGCCTCTGTCCGAAGCCTCAGCAGCACCAGCAGCAGCGTCCCCACCCACGCAGCCCACAGTGGAGATGCCACTACGCCCCGAA-|CAATTCCGTCATCAGCGTCTGCTCCTCCGGACACTTTGTAGGCAATGATGACTCTTTTTCCAGCCTGCCGTCTCCCAAGGAACTGTCCAGCTTCAGT
Dlc1	Del 0|16	19.7283	11.4096	28.8604	17.8922	21.6717	24.0374	18.2538	25.8177	30.9748	18.4939	17.0248	29.8809	28.3287	ACGAAAGCATGCTGACAGACCTCAGCGAGCACCAGGAGGTGGCCTCTGTCCGAAGCCTCAGCAGCACCAGCAGCAGCGTCCCCACCCACGCAGCCCACAGTGGAGATGCCACTACGCCCCGAAC|----------------GTCTGCTCCTCCGGACACTTTGTAGGCAATGATGACTCTTTTTCCAGCCTGCCGTCTCCCAAGGAACTGTCCAGCTTCAGT
Fbxw7	WT	96.56	96.4397	98.2103	21.0331	83.4441	96.9393	94.133	97.513	97.0944	97.3738	96.8203	95.4143	96.7825	GTGTGAGTATGCCTTCCCTATTTCCTTTTCCATAGTTGGCACTCTATGTGCTTTCATTCCTGGAACCCAAAGACCTGCTGCAAGCGGCTCAGACTTGTCGA|TACTGGAGAATTTTGGCTGAGGATAACCTTCTCTGGAGAGAGAAATGTAAAGAAGAGGGTAAGTTCAGAATCACACACAGATGTGTTTCTACTCTGGAAACAAGTTAACAGAATAACTTGGCTGTGAGTGAGAGT
Fbxw7	Del 3|0	1.77547	1.7851	1.02176	39.391	8.10741	1.61822	3.23135	1.33434	1.45333	1.28607	1.60263	2.4563	1.75772	GTGTGAGTATGCCTTCCCTATTTCCTTTTCCATAGTTGGCACTCTATGTGCTTTCATTCCTGGAACCCAAAGACCTGCTGCAAGCGGCTCAGACTTGT---|TACTGGAGAATTTTGGCTGAGGATAACCTTCTCTGGAGAGAGAAATGTAAAGAAGAGGGTAAGTTCAGAATCACACACAGATGTGTTTCTACTCTGGAAACAAGTTAACAGAATAACTTGGCTGTGAGTGAGAGT
Fbxw7	Del 0|5	1.66455	1.77515	0.767924	39.5759	8.44848	1.44245	2.63563	1.15262	1.45231	1.34009	1.57709	2.12935	1.45982	GTGTGAGTATGCCTTCCCTATTTCCTTTTCCATAGTTGGCACTCTATGTGCTTTCATTCCTGGAACCCAAAGACCTGCTGCAAGCGGCTCAGACTTGTCGA|-----GAGAATTTTGGCTGAGGATAACCTTCTCTGGAGAGAGAAATGTAAAGAAGAGGGTAAGTTCAGAATCACACACAGATGTGTTTCTACTCTGGAAACAAGTTAACAGAATAACTTGGCTGTGAGTGAGAGT
Hic1	WT	80.6219	49.9904	79.8175	51.9278	81.1052	60.6925	81.894	54.9408	81.1479	71.0841	75.4618	80.6108	72.4151	CTACGCTCCTTACGGGCGGCCCGGCCGGGGCTTGAGGGCTGCCACGCCCGTCATCCAGGCTTGCTACTCGTCCCCGGCCGGGCCACCGCCGCCGCCTGCCGCCGAGCCGCCGTCG|GGCCCCGATGCAGCCGTCAACACCCACTGCGCTGAGCTATATGCTTCAGGCCCGGGCCCAGCAGCCTCACTCTGCGCCCCGGAGCGTCGCTGCTCCCCGCTTTG
Hic1	Del 1|0	17.9345	34.3469	15.3387	35.6576	17.8253	22.9192	11.4119	35.989	14.7276	21.7233	19.6286	12.7002	23.6022	CTACGCTCCTTACGGGCGGCCCGGCCGGGGCTTGAGGGCTGCCACGCCCGTCATCCAGGCTTGCTACTCGTCCCCGGCCGGGCCACCGCCGCCGCCTGCCGCCGAGCCGCCGTC-|GGCCCCGATGCAGCCGTCAACACCCACTGCGCTGAGCTATATGCTTCAGGCCCGGGCCCAGCAGCCTCACTCTGCGCCCCGGAGCGTCGCTGCTCCCCGCTTTG
Hic1	Ins 1G	0	9.50469	3.4398	11.5122	1.06952	5.29532	4.66615	7.64238	2.89883	6.62093	2.95367	6.48653	3.84223	CTACGCTCCTTACGGGCGGCCCGGCCGGGGCTTGAGGGCTGCCACGCCCGTCATCCAGGCTTGCTACTCGTCCCCGGCCGGGCCACCGCCGCCGCCTGCCGCCGAGCCGCCGTCG|{G}GGCCCCGATGCAGCCGTCAACACCCACTGCGCTGAGCTATATGCTTCAGGCCCGGGCCCAGCAGCCTCACTCTGCGCCCCGGAGCGTCGCTGCTCCCCGCTTTG
Hic1	Del 0|63	1.44364	6.15797	1.404	0.902379	0	11.093	2.02801	1.42788	1.22568	0.571666	1.95594	0.202429	0.140414	CTACGCTCCTTACGGGCGGCCCGGCCGGGGCTTGAGGGCTGCCACGCCCGTCATCCAGGCTTGCTACTCGTCCCCGGCCGGGCCACCGCCGCCGCCTGCCGCCGAGCCGCCGTCG|---------------------------------------------------------------GCCTCACTCTGCGCCCCGGAGCGTCGCTGCTCCCCGCTTTG
Hnf1a	WT	100	100	100	100	100	100	100	100	100	100	100	100	100	GCCCTACCTGATGGTTGGAGAGGGTCCCCTGGACAAGGGGGAGTCCTGCGGTGGGAGTCGAGGGGACCTGACCGAGTTGCCTAATGGCCTTGG|AGAAACGCGTGGCTCTGAAGATGACACGGATGACGATGGGGAAGACTTCGCGCCACCCATTCTGAAAGAGCTGGAGAACCTCAGCCCAGAGGAGGCAGCCCACCAGAAAGCCGTGGTGGAGTCA
Keap1	WT	100	100	100	100	100	100	100	100	100	100	100	100	100	CTTCTACGTGCAGGCACTGCTGCGGGCCGTGCGCTGCCATGCGCTCACGCCGCGCTTCCTGCAGACGCAGCTGCAGAAGTGTGAGATCCTGCAGGCCGACG|CGCGCTGCAAGGACTACCTGGTGCAGATATTCCAGGAGCTCACGCTGCACAAGCCCACGCAGGCAGTGCCCTGCCGCGCGCCCAAAGTGGGCCGCCTCATCTACACAGCGGGCGGTTACTTCCGACAGTCGCT
Kmt2a	WT	0.230662	56.8198	10.9998	30.3112	13.8081	0.813285	0.357472	0.457335	0.199053	0.136581	0.502028	0.201496	0.16858	AGTTGCTGGCTCAGAAGATGCCGAGCCTCTTGCTCCTCCCATCAAACCAATTAAGCCTGTCACCAGAAACAAGGCACCTCAGGAGCCTCCGGTGAAGAAAGGGCGGCGATCA|AGGCGGTGCGGACAATGTCCTGGCTGCCAGGTGCCTGAGGACTGTGGCATTTGCACTAATTGCCTGGACAAGCCCAAGTTTGGTGGCCGCAATATA
Kmt2a	Del 6|0	32.1337	14.2107	31.2513	21.0737	30.1674	23.1162	30.1901	31.3216	34.8378	33.5864	27.2897	45.0676	32.5494	AGTTGCTGGCTCAGAAGATGCCGAGCCTCTTGCTCCTCCCATCAAACCAATTAAGCCTGTCACCAGAAACAAGGCACCTCAGGAGCCTCCGGTGAAGAAAGGGCGG------|AGGCGGTGCGGACAATGTCCTGGCTGCCAGGTGCCTGAGGACTGTGGCATTTGCACTAATTGCCTGGACAAGCCCAAGTTTGGTGGCCGCAATATA
Kmt2a	Del 7|0	30.519	13.4407	29.0541	21.5605	30.0939	23.0244	29.1186	29.6447	32.2244	32.155	26.0922	22.1504	30.6699	AGTTGCTGGCTCAGAAGATGCCGAGCCTCTTGCTCCTCCCATCAAACCAATTAAGCCTGTCACCAGAAACAAGGCACCTCAGGAGCCTCCGGTGAAGAAAGGGC-------A|AGGCGGTGCGGACAATGTCCTGGCTGCCAGGTGCCTGAGGACTGTGGCATTTGCACTAATTGCCTGGACAAGCCCAAGTTTGGTGGCCGCAATATA
Kmt2a	Ins 1 A	30.2305	12.7006	27.4907	20.759	25.2212	26.4995	28.9706	29.1348	29.1347	31.1138	28.8177	22.1703	30.4663	AGTTGCTGGCTCAGAAGATGCCGAGCCTCTTGCTCCTCCCATCAAACCAATTAAGCCTGTCACCAGAAACAAGGCACCTCAGGAGCCTCCGGTGAAGAAAGGGCGGCGATCA{A}|AGGCGGTGCGGACAATGTCCTGGCTGCCAGGTGCCTGAGGACTGTGGCATTTGCACTAATTGCCTGGACAAGCCCAAGTTTGGTGGCCGCAATATA
Kmt2a	Del 3|0 Ins 2GA	3.22927	1.09016	0.562038	2.55427	0.282038	11.5345	4.92581	4.22125	1.66189	1.47578	8.13418	4.95681	3.05597	AGTTGCTGGCTCAGAAGATGCCGAGCCTCTTGCTCCTCCCATCAAACCAATTAAGCCTGTCACCAGAAACAAGGCACCTCAGGAGCCTCCGGTGAAGAAAGGGCGGCGA---{GA}|AGGCGGTGCGGACAATGTCCTGGCTGCCAGGTGCCTGAGGACTGTGGCATTTGCACTAATTGCCTGGACAAGCCCAAGTTTGGTGGCCGCAATATA
Kmt2a	Del 1|0	2.13705	1.00536	0.381058	2.27192	0.234853	9.23004	3.86205	3.11003	1.13886	0.846977	5.22508	3.01393	1.74674	AGTTGCTGGCTCAGAAGATGCCGAGCCTCTTGCTCCTCCCATCAAACCAATTAAGCCTGTCACCAGAAACAAGGCACCTCAGGAGCCTCCGGTGAAGAAAGGGCGGCGAT-A|AGGCGGTGCGGACAATGTCCTGGCTGCCAGGTGCCTGAGGACTGTGGCATTTGCACTAATTGCCTGGACAAGCCCAAGTTTGGTGGCCGCAATATA
Kmt2a	Del 3|0	1.51984	0.73265	0.261011	1.46941	0.192494	5.7821	2.57534	2.11024	0.803218	0.685563	3.93909	2.43952	1.34317	AGTTGCTGGCTCAGAAGATGCCGAGCCTCTTGCTCCTCCCATCAAACCAATTAAGCCTGTCACCAGAAACAAGGCACCTCAGGAGCCTCCGGTGAAGAAAGGGCGGCGA---|AGGCGGTGCGGACAATGTCCTGGCTGCCAGGTGCCTGAGGACTGTGGCATTTGCACTAATTGCCTGGACAAGCCCAAGTTTGGTGGCCGCAATATA
Kmt2c	WT	100	100	100	100	100	100	100	100	100	100	100	100	100	CTCATGCCAAACCAGGATCCTTTTTTGCAAGCAGCACAAAACCGAGTACCAGGTTTACCTGGCCCTTTGATAAGGCCACCTGATACATGCTCCCAGACTCCCAGGCCACCTGGGCCTGGC|CGTATAGACACATTCACTCATGCTTCCTCATCTGCTGTTCGTGATCCATATGATCAGCCTCCAGTGACTCCCAGGCCTCATTCTGAGTCTTTCG
Lkb1	WT	3.65413	68.1116	16.7876	45.4934	21.1392	4.66779	3.84376	2.54754	1.76052	2.52458	4.5549	1.10446	1.16789	ATCGACTCCACCGAGGTAATCTACCAGCCGCGCCGCAAACGCGCCAAGCTCATCGGCAAGTACCTGATGGGGGACCTGCTCGGGGAGGGCTCGTACG|GCAAGGTGAAGGAGGTGCTGGACTCCGAGACCTTATGCCGCAGGGCGGTCAAGATCCTCAAGAAGAAAAAGCTGCGCAGGATCCCCAATGGAGAGGCCAACGTCAAGAAGTA
Lkb1	Del 4|0	10.9306	0.496425	0.400463	1.0593	0.396608	10.4155	8.3981	4.8066	4.44304	44.6925	38.4904	48.3284	47.1445	ATCGACTCCACCGAGGTAATCTACCAGCCGCGCCGCAAACGCGCCAAGCTCATCGGCAAGTACCTGATGGGGGACCTGCTCGGGGAGGGCTCG----|GCAAGGTGAAGGAGGTGCTGGACTCCGAGACCTTATGCCGCAGGGCGGTCAAGATCCTCAAGAAGAAAAAGCTGCGCAGGATCCCCAATGGAGAGGCCAACGTCAAGAAGTA
Lkb1	Del 5|2	39.2124	15.6588	41.7119	24.6045	38.4571	38.8942	39.9298	44.911	46.2589	44.1148	40.15	46.5007	47.7108	ATCGACTCCACCGAGGTAATCTACCAGCCGCGCCGCAAACGCGCCAAGCTCATCGGCAAGTACCTGATGGGGGACCTGCTCGGGGAGGGCTC----- | --AAGGTGAAGGAGGTGCTGGACTCCGAGACCTTATGCCGCAGGGCGGTCAAGATCCTCAAGAAGAAAAAGCTGCGCAGGATCCCCAATGGAGAGGCCAACGTCAAGAAGTA
Lkb1	Ins 1G	40.0683	15.3471	40.7623	27.8437	39.8474	38.2326	42.7921	44.4661	44.9445	5.15181	10.2114	2.50363	2.43439	ATCGACTCCACCGAGGTAATCTACCAGCCGCGCCGCAAACGCGCCAAGCTCATCGGCAAGTACCTGATGGGGGACCTGCTCGGGGAGGGCTCGTACG{G}|GCAAGGTGAAGGAGGTGCTGGACTCCGAGACCTTATGCCGCAGGGCGGTCAAGATCCTCAAGAAGAAAAAGCTGCGCAGGATCCCCAATGGAGAGGCCAACGTCAAGAAGTA
Lkb1	Del1|0	6.13457	0.386025	0.33774	0.999153	0.159715	7.78996	5.03619	3.26873	2.59307	3.51631	6.59334	1.56279	1.54241	ATCGACTCCACCGAGGTAATCTACCAGCCGCGCCGCAAACGCGCCAAGCTCATCGGCAAGTACCTGATGGGGGACCTGCTCGGGGAGGGCTCGTAC-|GCAAGGTGAAGGAGGTGCTGGACTCCGAGACCTTATGCCGCAGGGCGGTCAAGATCCTCAAGAAGAAAAAGCTGCGCAGGATCCCCAATGGAGAGGCCAACGTCAAGAAGTA
Mlh1	WT	0.740444	58.2694	10.9994	32.8212	15.8009	0.775601	1.13576	1.23383	0.726122	0.735234	0.778981	0.398318	0.52519	ATGTGCTAAAACCTGGCCTTTTTTACTCTTTTCTCTCTTGAAACAGACCTTGCTTCCAGGACTTGCTGGGCCTTCTGGGGAGGCAGCTAGACCCACGA|CAGGGGTGGCTTCCTCATCCACTAGTGGAAGTGGCGACAAGGTCTACGCTTACCAGATGGTCCGTACGGACTCCCGGGAGCAGAAGCTTGACGCCTTTCTGCAGCCTGTAAG
Mlh1	Del 2|0	33.9925	14.0757	31.116	25.3263	30.0835	33.605	34.0086	33.0702	33.8027	35.9214	36.8448	27.2046	33.6881	ATGTGCTAAAACCTGGCCTTTTTTACTCTTTTCTCTCTTGAAACAGACCTTGCTTCCAGGACTTGCTGGGCCTTCTGGGGAGGCAGCTAGACCCAC--|CAGGGGTGGCTTCCTCATCCACTAGTGGAAGTGGCGACAAGGTCTACGCTTACCAGATGGTCCGTACGGACTCCCGGGAGCAGAAGCTTGACGCCTTTCTGCAGCCTGTAAG
Mlh1	Del 1|3	31.907	13.3566	29.7471	20.5133	27.4265	31.953	32.1032	30.1537	32.4639	32.7333	31.9844	49.9151	31.0065	ATGTGCTAAAACCTGGCCTTTTTTACTCTTTTCTCTCTTGAAACAGACCTTGCTTCCAGGACTTGCTGGGCCTTCTGGGGAGGCAGCTAGACCCACG-|---GGGTGGCTTCCTCATCCACTAGTGGAAGTGGCGACAAGGTCTACGCTTACCAGATGGTCCGTACGGACTCCCGGGAGCAGAAGCTTGACGCCTTTCTGCAGCCTGTAAG
Mlh1	Del 8|0	28.3898	12.9673	27.2552	20.2202	25.4745	27.2863	23.8589	24.6722	27.7551	25.4428	25.0928	19.5826	30.5755	ATGTGCTAAAACCTGGCCTTTTTTACTCTTTTCTCTCTTGAAACAGACCTTGCTTCCAGGACTTGCTGGGCCTTCTGGGGAGGCAGCTAG--------|CAGGGGTGGCTTCCTCATCCACTAGTGGAAGTGGCGACAAGGTCTACGCTTACCAGATGGTCCGTACGGACTCCCGGGAGCAGAAGCTTGACGCCTTTCTGCAGCCTGTAAG
Mlh1	Del 3|0	4.97023	1.3309	0.882306	1.11891	1.21462	6.38009	8.89364	10.8701	5.25211	5.16723	5.29899	2.89931	4.20473	ATGTGCTAAAACCTGGCCTTTTTTACTCTTTTCTCTCTTGAAACAGACCTTGCTTCCAGGACTTGCTGGGCCTTCTGGGGAGGCAGCTAGACCCA---|CAGGGGTGGCTTCCTCATCCACTAGTGGAAGTGGCGACAAGGTCTACGCTTACCAGATGGTCCGTACGGACTCCCGGGAGCAGAAGCTTGACGCCTTTCTGCAGCCTGTAAG
Mst1	WT	0.531112	60.4131	11.6949	33.7305	14.3074	0.304841	0.437808	2.33366	0.428638	0.258481	0.265815	0.348327	0.391379	TGGGGTCAATCAAGCCTAAGGAGGGAGTGATAGGCCTGCCCCCACTTAGAAGTGCATTGGCCCTGTTTCCAGCTGTTTGTGTTCTGTGCAACGGTGAGGATTA|CCGTGGCGAGGTAGACGTTACAGAGTCAGGGCGGGAGTGTCAACGCTGGGACCTGCAGCACCCCCACTCGCACCCTTTCCAGCCTGAAAAGTATGTAGGCA
Mst1	Del 1|0	65.4898	26.0752	56.1275	42.3244	58.0782	66.7236	66.2424	64.6104	66.0102	66.5051	66.1717	74.4737	65.046	TGGGGTCAATCAAGCCTAAGGAGGGAGTGATAGGCCTGCCCCCACTTAGAAGTGCATTGGCCCTGTTTCCAGCTGTTTGTGTTCTGTGCAACGGTGAGGATT-|CCGTGGCGAGGTAGACGTTACAGAGTCAGGGCGGGAGTGTCAACGCTGGGACCTGCAGCACCCCCACTCGCACCCTTTCCAGCCTGAAAAGTATGTAGGCA
Mst1	Del 3|0	33.0859	13.3729	32.0443	23.7768	27.4932	31.9748	32.7689	27.6191	33.1962	32.706	33.0818	24.5494	34.2815	TGGGGTCAATCAAGCCTAAGGAGGGAGTGATAGGCCTGCCCCCACTTAGAAGTGCATTGGCCCTGTTTCCAGCTGTTTGTGTTCTGTGCAACGGTGAGGA---|CCGTGGCGAGGTAGACGTTACAGAGTCAGGGCGGGAGTGTCAACGCTGGGACCTGCAGCACCCCCACTCGCACCCTTTCCAGCCTGAAAAGTATGTAGGCA
Mst1	Ins 1A	0.893234	0.138739	0.133351	0.168232	0.121249	0.99683	0.550884	5.43686	0.364921	0.530425	0.480614	0.628502	0.281131	TGGGGTCAATCAAGCCTAAGGAGGGAGTGATAGGCCTGCCCCCACTTAGAAGTGCATTGGCCCTGTTTCCAGCTGTTTGTGTTCTGTGCAACGGTGAGGATTA{A}|CCGTGGCGAGGTAGACGTTACAGAGTCAGGGCGGGAGTGTCAACGCTGGGACCTGCAGCACCCCCACTCGCACCCTTTCCAGCCTGAAAAGTATGTAGGCA
Msx1	WT	95.8012	90.2847	99.1791	97.3888	98.6445	95.0252	91.8365	95.5421	95.9694	93.9953	94.3005	96.1645	93.7357	TCATGGCCGATCACAGGAAGCCCGGGGCCAAGGAGAGCGTCCTGGTGGCCTCCGAAGGGGCTCAGGCAGCGGGTGGCTCGGTGCAGCACTTGGGCACCCGGCCCGGGT|CTCTGGGCGCCCCGGATGCGCCCTCCTCGCCGCGGCCTCTCGGCCATTTCTCAGTCGGAGGACTCCTCAAGCTGCCAGAAGATGCTCTGGTGAAGGCCGAAAGCCCCGAGAAACTAGA
Msx1	Del 0|2	2.14506	4.13845	0.412428	1.38291	0.660237	2.63587	4.49387	2.37853	2.14722	3.30727	3.06248	2.09995	3.38481	TCATGGCCGATCACAGGAAGCCCGGGGCCAAGGAGAGCGTCCTGGTGGCCTCCGAAGGGGCTCAGGCAGCGGGTGGCTCGGTGCAGCACTTGGGCACCCGGCCCGGGT|--CTGGGCGCCCCGGATGCGCCCTCCTCGCCGCGGCCTCTCGGCCATTTCTCAGTCGGAGGACTCCTCAAGCTGCCAGAAGATGCTCTGGTGAAGGCCGAAAGCCCCGAGAAACTAGA
Msx1	Del 0|3	2.05375	5.57688	0.408488	1.22826	0.695261	2.33898	3.66958	2.07934	1.88336	2.69738	2.63702	1.73559	2.87951	TCATGGCCGATCACAGGAAGCCCGGGGCCAAGGAGAGCGTCCTGGTGGCCTCCGAAGGGGCTCAGGCAGCGGGTGGCTCGGTGCAGCACTTGGGCACCCGGCCCGGGT|---TGGGCGCCCCGGATGCGCCCTCCTCGCCGCGGCCTCTCGGCCATTTCTCAGTCGGAGGACTCCTCAAGCTGCCAGAAGATGCTCTGGTGAAGGCCGAAAGCCCCGAGAAACTAGA
Nf1	WT	100	100	100	100	100	100	100	100	100	100	100	100	100	GACTGTGTGGAGGGATTATGTTTTAAATGTAGGATGTGTGGCTGTGGCTATTGGCCTGACTGTGTGTTTCTTTAGGTGTATGGTGCTACTTACCTACAAAAGCTCTTGGACCCTTT|ATTACGAGTCATCATCACATCTTCGGATTGGCAACATGTTAGCTTTGAAGTGGATCCTACCAGGTTTGTCATCTTGTCACAGTTGCTCCCTCACTC
Notch3	WT	96.7191	90.228	98.7798	98.2966	99.0286	97.705	96.7206	97.1529	97.4572	97.563	96.9285	50	98.125	CATACGCTGTGAGAGCCAGGTGGATGAGTGCCGCAGCCAGCCCTGTCGATATGGGGGCAAATGTCTAGACTTGGTGGACAAGTACCTCTGCCGTTGTCC|TCCCGGAACCACAGGTGGGGCCTGGGGCTGGGCTATAACAGTACGTGGGGGTGTGTGGGGGTCTGTGATGAATTTGTAACTGGTGCTTGACAATAGTAGGTACTCTTGCCATACTTCTTCCCTCCCT
Notch3	Del 1|0	3.28092	9.77202	1.22025	1.70343	0.971356	2.29502	3.27937	2.84711	2.54279	2.43698	3.07152	50	1.875	CATACGCTGTGAGAGCCAGGTGGATGAGTGCCGCAGCCAGCCCTGTCGATATGGGGGCAAATGTCTAGACTTGGTGGACAAGTACCTCTGCCGTTGTC-|TCCCGGAACCACAGGTGGGGCCTGGGGCTGGGCTATAACAGTACGTGGGGGTGTGTGGGGGTCTGTGATGAATTTGTAACTGGTGCTTGACAATAGTAGGTACTCTTGCCATACTTCTTCCCTCCCT
P53	WT	1.00502	58.3509	12.6577	32.7873	18.9515	0.832952	0.902183	0.901199	0.84727	0.736953	0.804866	1.17584	0.852665	AGCCATAGGGGTTTGTTTGTTTGTATGTTTTTTAATTGACAAGTTATGCATCCATACAGTACACAATCTCTTCTCTCTACAGATGACTGCCATGGAGGAGTCACAGTCGGATATCAGCCTCGAGCTCCCTCTGA|GCCAGGAGACATTTTCAGGCTTATGGAAACTGTGAGTGGATCTTTTTGGGGCCCTTAAGATACATCCCGCCATACCTGTATCCTCCCCTTGCCTGAGAGAA
P53	Del 1|0	43.5645	27.2219	57.9612	41.0573	48.4851	49.0795	48.98	43.8628	52.2019	51.4076	50.0779	47.9896	52.217	AGCCATAGGGGTTTGTTTGTTTGTATGTTTTTTAATTGACAAGTTATGCATCCATACAGTACACAATCTCTTCTCTCTACAGATGACTGCCATGGAGGAGTCACAGTCGGATATCAGCCTCGAGCTCCCTCTG-|GCCAGGAGACATTTTCAGGCTTATGGAAACTGTGAGTGGATCTTTTTGGGGCCCTTAAGATACATCCCGCCATACCTGTATCCTCCCCTTGCCTGAGAGAA
P53	Ins 1 A	55.4305	14.4272	29.3811	26.1554	32.5634	50.0875	50.1178	55.236	46.9509	47.8554	49.1172	50.8346	46.9303	AGCCATAGGGGTTTGTTTGTTTGTATGTTTTTTAATTGACAAGTTATGCATCCATACAGTACACAATCTCTTCTCTCTACAGATGACTGCCATGGAGGAGTCACAGTCGGATATCAGCCTCGAGCTCCCTCTGA{T}|GCCAGGAGACATTTTCAGGCTTATGGAAACTGTGAGTGGATCTTTTTGGGGCCCTTAAGATACATCCCGCCATACCTGTATCCTCCCCTTGCCTGAGAGAA
Pik3r1	WT	12.5364	61.3961	12.71	34.9558	0	18.9422	11.8357	6.11631	5.67415	28.6433	10.7073	6.41868	7.36139	AGTGTGTGGTTACTCAAAGTTGAAAAGTAAGTATGGTCTTATACTGTGTTCATTTTAGGGAAGAAGTGAATGAAAAACTCCGAGACACTGCTGATGGGACCTTTT|TGGTACGAGACGCATCTACTAAAATGCACGGCGATTACACTCTTACACTAAGGTGAGCCAGGAAGTCAGCTGTAATTGCGATGTCTCAGTTGTCATGA
Pik3r1	Ins 1 T	66.0093	24.837	57.3901	40.9123	0	56.3234	59.3674	62.3695	63.5197	51.7794	60.5023	62.8673	62.5288	AGTGTGTGGTTACTCAAAGTTGAAAAGTAAGTATGGTCTTATACTGTGTTCATTTTAGGGAAGAAGTGAATGAAAAACTCCGAGACACTGCTGATGGGACCTTTT|{T}TGGTACGAGACGCATCTACTAAAATGCACGGCGATTACACTCTTACACTAAGGTGAGCCAGGAAGTCAGCTGTAATTGCGATGTCTCAGTTGTCATGA
Pik3r1	Del 1|0	21.4543	13.7669	29.8999	24.1318	0	24.7344	28.797	31.5142	30.8061	19.5772	28.7904	30.714	30.1098	AGTGTGTGGTTACTCAAAGTTGAAAAGTAAGTATGGTCTTATACTGTGTTCATTTTAGGGAAGAAGTGAATGAAAAACTCCGAGACACTGCTGATGGGACCTTT-|TGGTACGAGACGCATCTACTAAAATGCACGGCGATTACACTCTTACACTAAGGTGAGCCAGGAAGTCAGCTGTAATTGCGATGTCTCAGTTGTCATGA
Pten	WT	0.201808	20.2488	1.23285	5.2607	3.35339	0.093265	7.71195	0.145542	0.147151	0.0836026	0.12199	2.81566	0.168688	CTTTTGTCTCCCTCCTCCCTCTGCCCCCTGGGCCTATCAGGGAGTCACAATTCCCAGTCAGAGGCGCTATGTATATTATTATAGCTACCTGCTAAAAAATCACCTGGATTACAGAC|CCGTGGCACTGCTGTTTCACAAGATGATGTTTGAAACTATTCCAATGTTCAGTGGCGGAACTTGCAGTAAGTGCTCTAAATTCTTAGCTGTCTGTGTGTCGGA
Pten	Del 4|0	51.8346	46.5363	78.5747	74.0028	78.5769	65.5399	44.082	80.101	77.119	75.0948	81.6267	52.1921	70.4118	CTTTTGTCTCCCTCCTCCCTCTGCCCCCTGGGCCTATCAGGGAGTCACAATTCCCAGTCAGAGGCGCTATGTATATTATTATAGCTACCTGCTAAAAAATCACCTGGATTAC----|CCGTGGCACTGCTGTTTCACAAGATGATGTTTGAAACTATTCCAATGTTCAGTGGCGGAACTTGCAGTAAGTGCTCTAAATTCTTAGCTGTCTGTGTGTCGGA
Pten	Del 1|0	46.9349	29.8891	20.017	20.4135	17.2577	33.9168	39.3869	19.3852	21.8586	24.7218	18.0248	34.8555	26.0115	CTTTTGTCTCCCTCCTCCCTCTGCCCCCTGGGCCTATCAGGGAGTCACAATTCCCAGTCAGAGGCGCTATGTATATTATTATAGCTACCTGCTAAAAAATCACCTGGATTACAGA-|CCGTGGCACTGCTGTTTCACAAGATGATGTTTGAAACTATTCCAATGTTCAGTGGCGGAACTTGCAGTAAGTGCTCTAAATTCTTAGCTGTCTGTGTGTCGGA
Pten	Del 9|1	1.0287	3.32569	0.175384	0.322967	0.812058	0.450026	8.81912	0.368277	0.87526	0.0997611	0.226444	10.1368	3.40796	CTTTTGTCTCCCTCCTCCCTCTGCCCCCTGGGCCTATCAGGGAGTCACAATTCCCAGTCAGAGGCGCTATGTATATTATTATAGCTACCTGCTAAAAAATCACCTGG--------- | -CGTGGCACTGCTGTTTCACAAGATGATGTTTGAAACTATTCCAATGTTCAGTGGCGGAACTTGCAGTAAGTGCTCTAAATTCTTAGCTGTCTGTGTGTCGGA
Rasa1	WT	0.216688	58.3417	10.4107	31.6702	15.7851	0.497187	0.360326	0.841412	3.10351	0.241676	0.356706	0.271655	0.33524	AGCGTGCCGGGTCAAGTTACCCGCGGCCCTGCCGGTGGCAGCCGCCCCGTGTCCCGGGCTGGCGGACGCCGACT|TGGTTGCGGCCCTCGGTGGCGGAGCCGCGTCGGGGTCCGGGTTCCTGGGGACCGGGCCGGTGGCCGGTGTCTTGGGGGGCGCCGCGCTGACCGGCAGTGCTGCTG
Rasa1	Del 1|0	44.8668	25.3089	53.9377	44.7962	50.2521	3.60941	36.4524	36.8171	41.242	30.0191	4.65664	35.9863	38.6858	AGCGTGCCGGGTCAAGTTACCCGCGGCCCTGCCGGTGGCAGCCGCCCCGTGTCCCGGGCTGGCGGACGCCGACT|TGGTTGCGGCCCTCGGTGGCGGAGCCGCGTCGGGGTCCGGGTTCCTGGGGACCGGGCCGGTGGCCGGTGTCTTGGGGGGCGCCGCGCTGACCGGCAGTGCTGCTG
Rasa1	Ins 1A	54.9166	16.3494	35.6515	23.5336	33.9628	95.8934	63.1872	62.3415	55.6545	69.7392	94.9866	63.7421	60.979	AGCGTGCCGGGTCAAGTTACCCGCGGCCCTGCCGGTGGCAGCCGCCCCGTGTCCCGGGCTGGCGGACGCCGACT|{A}TGGTTGCGGCCCTCGGTGGCGGAGCCGCGTCGGGGTCCGGGTTCCTGGGGACCGGGCCGGTGGCCGGTGTCTTGGGGGGCGCCGCGCTGACCGGCAGTGCTGCTG
Rb1	WT	1.06255	45.396	6.33474	22.0115	11.8828	0.999444	1.22433	1.09175	0.623791	0.646056	0.764719	1.09145	0.813276	TACAGAAACAGCTGCAATCCCCATTAATGGTTCACCTCGAACACCCAGAAGAGGTCAGAACAGGAGCGCTCGGATAGCAAAACAACTAGAAAATGAT|ACGAGGATTATCGAGGTTCTCTGTAAAGAACACGAGTGTAATATAGATGAGGTAATTTCTCTTACACTTTATTTAAAACAGCTGAAGTAGATATATATGCTAAGTCTGCCTGTCA
Rb1	Del 2|0	31.2669	5.72423	10.6897	18.7234	10.8634	8.22491	9.32995	12.7116	5.71858	31.0283	24.7637	6.14692	5.0193	TACAGAAACAGCTGCAATCCCCATTAATGGTTCACCTCGAACACCCAGAAGAGGTCAGAACAGGAGCGCTCGGATAGCAAAACAACTAGAAAAT--T|ACGAGGATTATCGAGGTTCTCTGTAAAGAACACGAGTGTAATATAGATGAGGTAATTTCTCTTACACTTTATTTAAAACAGCTGAAGTAGATATATATGCTAAGTCTGCCTGTCA
Rb1	Ins 1 T	20.3177	9.84062	14.3366	13.9863	18.6589	0.457821	0.581112	14.3288	24.0086	37.1159	49.1103	48.1751	60.8768	TACAGAAACAGCTGCAATCCCCATTAATGGTTCACCTCGAACACCCAGAAGAGGTCAGAACAGGAGCGCTCGGATAGCAAAACAACTAGAAAATGAT{T}|ACGAGGATTATCGAGGTTCTCTGTAAAGAACACGAGTGTAATATAGATGAGGTAATTTCTCTTACACTTTATTTAAAACAGCTGAAGTAGATATATATGCTAAGTCTGCCTGTCA
Rb1	Del 1|0	37.6307	28.2243	48.1803	34.2485	46.1641	80.708	79.3417	54.3225	61.5405	2.0415	2.322	3.56077	2.76436	TACAGAAACAGCTGCAATCCCCATTAATGGTTCACCTCGAACACCCAGAAGAGGTCAGAACAGGAGCGCTCGGATAGCAAAACAACTAGAAAATG-T|ACGAGGATTATCGAGGTTCTCTGTAAAGAACACGAGTGTAATATAGATGAGGTAATTTCTCTTACACTTTATTTAAAACAGCTGAAGTAGATATATATGCTAAGTCTGCCTGTCA
Rb1	Del 6|21	3.91067	5.65583	10.6897	5.7701	6.82157	3.80636	3.21497	6.93012	3.66792	4.00571	4.10882	4.91528	3.97264	TACAGAAACAGCTGCAATCCCCATTAATGGTTCACCTCGAACACCCAGAAGAGGTCAGAACAGGAGCGCTCGGATAGCAAAACAACTAGAA------|---------------------TGTAAAGAACACGAGTGTAATATAGATGAGGTAATTTCTCTTACACTTTATTTAAAACAGCTGAAGTAGATATATATGCTAAGTCTGCCTGTCA
Rb1	Del 1|2	5.81147	5.15895	9.76896	5.26028	5.60918	5.80348	6.30794	10.6152	4.44062	25.1626	18.9305	36.1104	26.5537	TACAGAAACAGCTGCAATCCCCATTAATGGTTCACCTCGAACACCCAGAAGAGGTCAGAACAGGAGCGCTCGGATAGCAAAACAACTAGAAAATGA-|--GAGGATTATCGAGGTTCTCTGTAAAGAACACGAGTGTAATATAGATGAGGTAATTTCTCTTACACTTTATTTAAAACAGCTGAAGTAGATATATATGCTAAGTCTGCCTGTCA
Rps6ka3	WT	100	100	100	100	100	100	100	100	100	100	100	100	100	GAGAGTCATTCTGGGCTAACAATGGGTTGTCTCTATATTTACCTTAACAGGAAGAAGGCAGTATCAAAGAAATTGCAATCACACATCATGTGAAGGAAGGACATG|AAAAGGCAGATCCTTCCCAGTTTGAACTTTTAAAAGTATTAGGGCAGGGATCATTTGGAAAGGTAAGTCATAGTTGTTTGC
Runx3	WT	91.5533	94.1117	91.7866	91.5908	92.5963	92.8017	90.4435	93.18	93.3144	90.942	92.1739	92.6329	92.0082	GACAGCCCCAACTTCCTCTGCTCCGTGCTGCCCTCGCACTGGCGCTGCAACAAGACGCTGCCGGTCGCCT|TCAAGGTGAGTGCAGGGGCCCGAGCCGGGAGGACACCGGGGAACCTGGGCGCCCCCATTTGCAGGAGCCCATACCGGGGAGGACTTGGGGAGCACCTAGAAGTAGGACATGAAAGGGGATGTCACCCAG
Runx3	Del 1|0	8.44671	5.8883	8.21336	8.40924	7.4037	7.19826	9.55646	6.82003	6.68556	9.058	7.82615	7.36712	7.99178	GACAGCCCCAACTTCCTCTGCTCCGTGCTGCCCTCGCACTGGCGCTGCAACAAGACGCTGCCGGTCGCC-|TCAAGGTGAGTGCAGGGGCCCGAGCCGGGAGGACACCGGGGAACCTGGGCGCCCCCATTTGCAGGAGCCCATACCGGGGAGGACTTGGGGAGCACCTAGAAGTAGGACATGAAAGGGGATGTCACCCAG
Setd5	WT	100	100	100	100	100	100	100	100	100	100	100	100	100	GCCCTGGTTTTAGTAGGTAATCGCTCAGAAGGAAAGTTTTAACTCCTGGGAAAGCCCCTTCTATGCTAATTTATTCTATCGGGCGCCTTTGCCTTTCTCATTCTTAGGAATAAGGATCTTTCTCCTGTG|TACTGATGCTGCAGCCCGCCCTGCTGGCCTGGGTCAGGGGTGCGTGGATGACCTGCATTTTCTGCTTTCTCATGTTACTTGTGTAACGTCTTCACC
Smad4	WT	26.9629	96.072	99.4663	99.168	96.2779	32.4071	23.4591	41.6877	25.5049	45.4088	39.0536	40.7289	39.7699	AGTACGTTCACGACTTTGAAGGACAGCCGTCCTTACCCACTGAAGGACATTCGATTCAAACCATCCAACACCCGCCAAGTAATCGCGCATCAACGGAGACGTACAGCG|CCCCGGCTCTGTTAGCCCCGGCAGAGTCTAACGCCACCAGCACCACCAACTTCCCCAACATTCCTGTGGCTTCCACAAGTGAGTGTTGCAGTCAGATCGAGTCGAAAGTTTTC
Smad4	Del 2|0	36.9614	1.92348	0.295387	0.384926	1.86418	33.7581	37.7641	28.678	36.4996	27.1207	29.7661	28.8339	29.0089	AGTACGTTCACGACTTTGAAGGACAGCCGTCCTTACCCACTGAAGGACATTCGATTCAAACCATCCAACACCCGCCAAGTAATCGCGCATCAACGGAGACGTACAG--|CCCCGGCTCTGTTAGCCCCGGCAGAGTCTAACGCCACCAGCACCACCAACTTCCCCAACATTCCTGTGGCTTCCACAAGTGAGTGTTGCAGTCAGATCGAGTCGAAAGTTTTC
Smad4	Del 1|0	36.0757	2.00451	0.238363	0.447032	1.85797	33.8348	38.7769	29.6343	37.9955	27.4705	31.1803	30.4372	31.2213	AGTACGTTCACGACTTTGAAGGACAGCCGTCCTTACCCACTGAAGGACATTCGATTCAAACCATCCAACACCCGCCAAGTAATCGCGCATCAACGGAGACGTACAGC-|CCCCGGCTCTGTTAGCCCCGGCAGAGTCTAACGCCACCAGCACCACCAACTTCCCCAACATTCCTGTGGCTTCCACAAGTGAGTGTTGCAGTCAGATCGAGTCGAAAGTTTTC
Tet2	WT	67.936	85.5691	59.7376	75.0267	59.9252	58.435	19.9551	58.7472	53.7263	57.3342	58.6577	54.6241	58.7247	CACCGTCACAATCACTTCTTGCTCCCCGTCTTGTTCTTCAGCCTCCTTTAGAAGGAAAAGGCGCTCTAAATGATGTAGCTTTGGAAGAACACCATGACTACCCCAAC|CGAAGCAACCGAACTCTTTTAAGGGAAGGGAAAATAGACCATCAACCCAAGACATCATCTAGCCAGAGTCTGAATCCATCTGTACATACACCCAACCCCCCCTTGATGCTTCCAGAACAGCAT
Tet2	Del 2|4	32.064	14.4309	40.2624	24.9733	40.0748	41.565	80.0449	41.2528	46.2737	42.6658	41.3423	45.3759	41.2753	CACCGTCACAATCACTTCTTGCTCCCCGTCTTGTTCTTCAGCCTCCTTTAGAAGGAAAAGGCGCTCTAAATGATGTAGCTTTGGAAGAACACCATGACTACCCCA--|----GCAACCGAACTCTTTTAAGGGAAGGGAAAATAGACCATCAACCCAAGACATCATCTAGCCAGAGTCTGAATCCATCTGTACATACACCCAACCCCCCCTTGATGCTTCCAGAACAGCAT
Tsc1	WT	100	100	100	100	100	100	100	100	100	100	100	100	100	TACTCTGCGACACAGAACATGCCCAGCATTTTCACTGTGCTTCCATTTCAGGAAGAAAGAGCAGATTCCTCAAGGCCTTACCTTCACAGACAGTCAAACGACCGAGG|ATTAGGTAAACTCCCTGGGTAATGATGGGCCTTGCTTGCCTCTTGGCATTGAACTCTGTAGCTTAAAAGCTAAGCTGGGTGGAAGAAGGATTTTCTGGGATAGCACCTATGCT
Tsc2	WT	0.0320102	53.881	8.61579	28.6023	11.9231	0.0841574	0.0634628	0.271862	0.0539021	0.0285334	0.0813158	0.0844195	0.0717044	CTAAGGTCCCTGGAGGCTACACCCTTCTCACTGTCCCCTTTTTGTCATGGCAGCATGCAGTGGAGGCACTTTGGAAGGCTGTCTCAGACTTGCTACAGCCAGAGCGGCCAC|CAGAGGCCCGGCATGCAGTTCTCACCTTATTGAAGGCCATTGTACAGGGACAGGTAAGGGGTGGAGCTGTGTGAGCCTGTGGGATGAAGGCAGACCGTCACCGTTTGAGCTCCTGC
Tsc2	Del 1|0	25.5122	12.0931	22.2589	18.6363	21.4432	20.3591	19.6735	27.1409	23.7939	28.4288	25.2116	24.1474	23.8261	CTAAGGTCCCTGGAGGCTACACCCTTCTCACTGTCCCCTTTTTGTCATGGCAGCATGCAGTGGAGGCACTTTGGAAGGCTGTCTCAGACTTGCTACAGCCAGAGCGGCCA-|CAGAGGCCCGGCATGCAGTTCTCACCTTATTGAAGGCCATTGTACAGGGACAGGTAAGGGGTGGAGCTGTGTGAGCCTGTGGGATGAAGGCAGACCGTCACCGTTTGAGCTCCTGC
Tsc2	Del 3|0	45.8387	22.6559	45.7885	34.1034	43.6329	57.8021	57.4165	32.1855	24.5101	42.0107	46.8823	49.301	48.5696	CTAAGGTCCCTGGAGGCTACACCCTTCTCACTGTCCCCTTTTTGTCATGGCAGCATGCAGTGGAGGCACTTTGGAAGGCTGTCTCAGACTTGCTACAGCCAGAGCGGC---|CAGAGGCCCGGCATGCAGTTCTCACCTTATTGAAGGCCATTGTACAGGGACAGGTAAGGGGTGGAGCTGTGTGAGCCTGTGGGATGAAGGCAGACCGTCACCGTTTGAGCTCCTGC
Tsc2	Del 0|3	24.6479	11.0708	22.9466	18.2017	22.7068	18.6409	19.4715	14.5748	49.1356	21.4571	23.9956	23.678	24.8833	CTAAGGTCCCTGGAGGCTACACCCTTCTCACTGTCCCCTTTTTGTCATGGCAGCATGCAGTGGAGGCACTTTGGAAGGCTGTCTCAGACTTGCTACAGCCAGAGCGGCCAC|---AGGCCCGGCATGCAGTTCTCACCTTATTGAAGGCCATTGTACAGGGACAGGTAAGGGGTGGAGCTGTGTGAGCCTGTGGGATGAAGGCAGACCGTCACCGTTTGAGCTCCTGC
Tsc2	Del 2|0	3.87324	0.256764	0.313225	0.387708	0.206747	3.02265	3.27122	12.4452	2.4256	7.96081	3.75901	2.72169	2.57584	CTAAGGTCCCTGGAGGCTACACCCTTCTCACTGTCCCCTTTTTGTCATGGCAGCATGCAGTGGAGGCACTTTGGAAGGCTGTCTCAGACTTGCTACAGCCAGAGCGGCC--|CAGAGGCCCGGCATGCAGTTCTCACCTTATTGAAGGCCATTGTACAGGGACAGGTAAGGGGTGGAGCTGTGTGAGCCTGTGGGATGAAGGCAGACCGTCACCGTTTGAGCTCCTGC
Tsc2	Del 1|0	0.0960307	0.0425314	0.0769968	0.0686208	0.0872135	0.0911705	0.103848	13.3817	0.0808532	0.114134	0.0702273	0.0675356	0.0735429	CTAAGGTCCCTGGAGGCTACACCCTTCTCACTGTCCCCTTTTTGTCATGGCAGCATGCAGTGGAGGCACTTTGGAAGGCTGTCTCAGACTTGCTACAGCCAGAGCGGCC-C|CAGAGGCCCGGCATGCAGTTCTCACCTTATTGAAGGCCATTGTACAGGGACAGGTAAGGGGTGGAGCTGTGTGAGCCTGTGGGATGAAGGCAGACCGTCACCGTTTGAGCTCCTGC
