# Supplementary material for: Extrachromosomal circular DNA harboring targeted tumor suppressor gene mutations supports intratumor heterogeneity in mouse liver cancer induced by multiplexed CRISPR/Cas9
Source: Research Square preprint supplement (doi:10.21203/rs.3.rs-1333557/v1), 2022-02-10
Supplement: Supplementary file 3 [file d4cba69223fd600dc9a23282.xlsx]

## Sheet: Mutation Type Reads
Target Gene	Mutation Type	1C3-1		1C3-2		1C3-3		6C7-2		6C7-4
		gDNA	circDNA	gDNA	circDNA	gDNA	circDNA	gDNA	circDNA	gDNA	circDNA	Reference
Apc	WT	377	47	66	171	62	231	50	285	——	——	CATGGCATAAAGCAGTTACTACATAAGAACTTGTTTCTGTTTAGAATTTAACTTAGATAGTAATTTCCCCGGAGTGAAACTACGCTCAAAAATGTCCCTTCGCTCCTACG|GAAGTCGGGAAGGATCTGTATCCAGCCGTTCAGGAGAATGCAGTCCTGTCCCCATGGGGTCATTCCCAAGAAGAACATTTGTAAATGGAAGCAGAGAGAGTACTGGGTATC
Apc	Ins 1 A	12357	506	452	701	479	1172	392	1164	625	1368	CATGGCATAAAGCAGTTACTACATAAGAACTTGTTTCTGTTTAGAATTTAACTTAGATAGTAATTTCCCCGGAGTGAAACTACGCTCAAAAATGTCCCTTCGCTCCTACG|{A}GAAGTCGGGAAGGATCTGTATCCAGCCGTTCAGGAGAATGCAGTCCTGTCCCCATGGGGTCATTCCCAAGAAGAACATTTGTAAATGGAAGCAGAGAGAGTACTGGGTATC
Apc	Del 0|5	212	213	8093	2884	5517	713	187	554	273	559	CATGGCATAAAGCAGTTACTACATAAGAACTTGTTTCTGTTTAGAATTTAACTTAGATAGTAATTTCCCCGGAGTGAAACTACGCTCAAAAATGTCCCTTCGCTCCTACG|-----CGGGAAGGATCTGTATCCAGCCGTTCAGGAGAATGCAGTCCTGTCCCCATGGGGTCATTCCCAAGAAGAACATTTGTAAATGGAAGCAGAGAGAGTACTGGGTATC
Apc	Del 3|3	230	155	9480	3057	6321	941	203	822	296	579	CATGGCATAAAGCAGTTACTACATAAGAACTTGTTTCTGTTTAGAATTTAACTTAGATAGTAATTTCCCCGGAGTGAAACTACGCTCAAAAATGTCCCTTCGCTCCT---|---GTCGGGAAGGATCTGTATCCAGCCGTTCAGGAGAATGCAGTCCTGTCCCCATGGGGTCATTCCCAAGAAGAACATTTGTAAATGGAAGCAGAGAGAGTACTGGGTATC
Apc	Del 1|0	6346	98	74	187	119	217	5367	480	5433	563	CATGGCATAAAGCAGTTACTACATAAGAACTTGTTTCTGTTTAGAATTTAACTTAGATAGTAATTTCCCCGGAGTGAAACTACGCTCAAAAATGTCCCTTCGCTCCTAC-|GAAGTCGGGAAGGATCTGTATCCAGCCGTTCAGGAGAATGCAGTCCTGTCCCCATGGGGTCATTCCCAAGAAGAACATTTGTAAATGGAAGCAGAGAGAGTACTGGGTATC
Apc	Del 0|2	——	——	——	——	——	——	3706	142	4647	138	CATGGCATAAAGCAGTTACTACATAAGAACTTGTTTCTGTTTAGAATTTAACTTAGATAGTAATTTCCCCGGAGTGAAACTACGCTCAAAAATGTCCCTTCGCTCCTACG|--AGTCGGGAAGGATCTGTATCCAGCCGTTCAGGAGAATGCAGTCCTGTCCCCATGGGGTCATTCCCAAGAAGAACATTTGTAAATGGAAGCAGAGAGAGTACTGGGTATC
Apc	Del 4|1	——	——	——	——	——	——	2860	112	5127	140	CATGGCATAAAGCAGTTACTACATAAGAACTTGTTTCTGTTTAGAATTTAACTTAGATAGTAATTTCCCCGGAGTGAAACTACGCTCAAAAATGTCCCTTCGCTCC----|-AAGTCGGGAAGGATCTGTATCCAGCCGTTCAGGAGAATGCAGTCCTGTCCCCATGGGGTCATTCCCAAGAAGAACATTTGTAAATGGAAGCAGAGAGAGTACTGGGTATC
Apob	WT	——	——	15	312	——	——	——	——	——	——	TCCGAAGACCCTGTAGAGCAAGCAGCAGGGGCTAGGCCCGTGGCCAGGCCACAGCCAGGAAGCCACCCCACCATCCATCCGCCATGGGCCCACGAAAGCCTGCCCTGC|GGACGCCGTTACTGCTGCTGTTCCTGCTACTGTTCTTGGACACCAGCGTCTGGGCTCGTGAGTTAGGGTGGAAGCCTGGGAGAAAGCCA
Apob	Del 0|1	15970	6002	87	2582	401	729	2949	1020	7515	791	TCCGAAGACCCTGTAGAGCAAGCAGCAGGGGCTAGGCCCGTGGCCAGGCCACAGCCAGGAAGCCACCCCACCATCCATCCGCCATGGGCCCACGAAAGCCTGCCCTGC|-GACGCCGTTACTGCTGCTGTTCCTGCTACTGTTCTTGGACACCAGCGTCTGGGCTCGTGAGTTAGGGTGGAAGCCTGGGAGAAAGCCA
Apob	Del 0|2	547	725	2088	4090	5145	210	——	——	——	——	TCCGAAGACCCTGTAGAGCAAGCAGCAGGGGCTAGGCCCGTGGCCAGGCCACAGCCAGGAAGCCACCCCACCATCCATCCGCCATGGGCCCACGAAAGCCTGCCCTGC|G--CGCCGTTACTGCTGCTGTTCCTGCTACTGTTCTTGGACACCAGCGTCTGGGCTCGTGAGTTAGGGTGGAAGCCTGGGAGAAAGCCA
Apob	Ins 1 G	6595	883	14	485	——	——	29	114	——	——	TCCGAAGACCCTGTAGAGCAAGCAGCAGGGGCTAGGCCCGTGGCCAGGCCACAGCCAGGAAGCCACCCCACCATCCATCCGCCATGGGCCCACGAAAGCCTGCCCTGC|{G}GGACGCCGTTACTGCTGCTGTTCCTGCTACTGTTCTTGGACACCAGCGTCTGGGCTCGTGAGTTAGGGTGGAAGCCTGGGAGAAAGCCA
Apob	Del 0|12	——	——	1423	864	3919	29	——	——	——	——	TCCGAAGACCCTGTAGAGCAAGCAGCAGGGGCTAGGCCCGTGGCCAGGCCACAGCCAGGAAGCCACCCCACCATCCATCCGCCATGGGCCCACGAAAGCCTGCCCTGC|G------------GCTGCTGTTCCTGCTACTGTTCTTGGACACCAGCGTCTGGGCTCGTGAGTTAGGGTGGAAGCCTGGGAGAAAGCCA
Apob	Del 0|6	——	——	——	——	——	——	781	157	2041	38	TCCGAAGACCCTGTAGAGCAAGCAGCAGGGGCTAGGCCCGTGGCCAGGCCACAGCCAGGAAGCCACCCCACCATCCATCCGCCATGGGCCCACGAAAGCCTGCCCTGC|------CGTTACTGCTGCTGTTCCTGCTACTGTTCTTGGACACCAGCGTCTGGGCTCGTGAGTTAGGGTGGAAGCCTGGGAGAAAGCCA
Apob	Del 0|9	——	——	——	——	——	——	1439	254	2184	55	TCCGAAGACCCTGTAGAGCAAGCAGCAGGGGCTAGGCCCGTGGCCAGGCCACAGCCAGGAAGCCACCCCACCATCCATCCGCCATGGGCCCACGAAAGCCTGCCCTGC|G---------ACTGCTGCTGTTCCTGCTACTGTTCTTGGACACCAGCGTCTGGGCTCGTGAGTTAGGGTGGAAGCCTGGGAGAAAGCCA
Arid1a	Del 11|16	15334	331	40	363	201	55	53	18	73	99	TATGCAGAGGAACCCCCAGATGCCCCAGTACACTTCCCCTCAGCCTGGCTCGGCCTTATCCCCACGTCAGCCGTCTGGAGGACAG----------- | ----------------CAGAACTCCATGGGGAGCTACGGCCCCCAGGGCAGTCAGTATGGCCCACAAGGTAAGTGTGCTACCCCTTTAGAAGGAAAGAGAGGTACTGTGTTAACGGCTG
Arid1a	Del 24|25	8179	262	60	250	108	47	66	1	——	——	TATGCAGAGGAACCCCCAGATGCCCCAGTACACTTCCCCTCAGCCTGGCTCGGCCTTATCCCCACGTCAGCC------------------------ | -------------------------ATGGGGAGCTACGGCCCCCAGGGCAGTCAGTATGGCCCACAAGGTAAGTGTGCTACCCCTTTAGAAGGAAAGAGAGGTACTGTGTTAACGGCTG
Arid1a	Del 0|4	——	——	866	21	1534	6	733	6	991	34	TATGCAGAGGAACCCCCAGATGCCCCAGTACACTTCCCCTCAGCCTGGCTCGGCCTTATCCCCACGTCAGCCGTCTGGAGGACAGATGCACTCGGG|----GGCTCCTACCAGCAGAACTCCATTAGGGGAGCTACGGCCCCCAGGGCAGTCAGTATGGCCCACAAGGTAAGTGTGCTACCCCTTTAGAAGGAAAGAGAGGTACTGTGTTAACGGCTG
Arid1a	Del 10|9	——	——	1752	1480	3910	60	46	25	76	187	TATGCAGAGGAACCCCCAGATGCCCCAGTACACTTCCCCTCAGCCTGGCTCGGCCTTATCCCCACGTCAGCCGTCTGGAGGACAGA---------- | ---------CTACCAGCAGAACTCCATGGGGAGCTACGGCCCCCAGGGCAGTCAGTATGGCCCACAAGGTAAGTGTGCTACCCCTTTAGAAGGAAAGAGAGGTACTGTGTTAACGGCTG
Arid1a	Del 0|2	——	——	——	——	——	——	449	13	969	17	TATGCAGAGGAACCCCCAGATGCCCCAGTACACTTCCCCTCAGCCTGGCTCGGCCTTATCCCCACGTCAGCCGTCTGGAGGACAGATGCACTCGGG|--TGGGCTCCTACCAGCAGAACTCCATTAGGGGAGCTACGGCCCCCAGGGCAGTCAGTATGGCCCACAAGGTAAGTGTGCTACCCCTTTAGAAGGAAAGAGAGGTACTGTGTTAACGGCTG
Arid1a	Del 1|2	——	——	——	——	——	——	649	1	2192	34	TATGCAGAGGAACCCCCAGATGCCCCAGTACACTTCCCCTCAGCCTGGCTCGGCCTTATCCCCACGTCAGCCGTCTGGAGGACAGATGCACTCGG-|--TGGGCTCCTACCAGCAGAACTCCATTAGGGGAGCTACGGCCCCCAGGGCAGTCAGTATGGCCCACAAGGTAAGTGTGCTACCCCTTTAGAAGGAAAGAGAGGTACTGTGTTAACGGCTG
Arid1b	WT	4342	835	3763	39	4769	5	128	28	456	11	CTTGGGCAAGGACCTAGGCGCCCAGTACGCCGCTGCCAGCCCGGCCTGGGCGGCCGCGCAACAAAGGAGTCACCCGGCGATGAGCCCCGGCACCCCCG|GACCGACCATGGGCAGATCCCAGGTAACCCCCGCGCCCGGCCGGGCCTGCTTCCGCCCGGGCCTCGCGCCGCGAGCCCGACTTTCTTTCTTCGCCGGGTACTTTTCCCGGCGGTTG
Arid1b	Del 23|24	24537	19260	3578	377	9196	186	1855	1	4723	137	CTTGGGCAAGGACCTAGGCGCCCAGTACGCCGCTGCCAGCCCGGCCTGGGCGGCCGCGCAACAAAGGAGTCACCC----------------------- | ------------------------TAACCCCCGCGCCCGGCCGGGCCTGCTTCCGCCCGGGCCTCGCGCCGCGAGCCCGACTTTCTTTCTTCGCCGGGTACTTTTCCCGGCGGTTG
Arid1b	Del 34|25	——	——	——	——	——	——	——	——	236	34	CTTGGGCAAGGACCTAGGCGCCCAGTACGCCGCTGCCAGCCCGGCCTGGGCGGCCGCGCAACAAAGGAGTCACCC----------------------- | ------------------------TAACCCCCGCGCCCGGCCGGGCCTGCTTCCGCCCGGGCCTCGCGCCGCGAGCCCGACTTTCTTTCTTCGCCGGGTACTTTTCCCGGCGGTTG
Arid2	WT	368	1688	13	42	——	——	27	2177	209	703	CAGCTTAACATAGGGCTTCCTGTGGTATATAATGTCTTTATTCCTCTCTCTCTCTCTTTTAGGCTAAATGCTCATTTTGAAGTAAATCCAGAC|TGTTCCGTCTCTCGGGCAGAAATGTATTCAGAGTACCTCTCAACTTGCAGTAAATTAGCTCGCGGTGGCATCCTCACATCAACTGGGTTTTATAAGTGTCTTAGGTAACTCGCACAGCTC
Arid2	Del 0|3	839	4384	2013	2521	5092	275	6747	9763	12128	6501	CAGCTTAACATAGGGCTTCCTGTGGTATATAATGTCTTTATTCCTCTCTCTCTCTCTTTTAGGCTAAATGCTCATTTTGAAGTAAATCCAGAC|---TCCGTCTCTCGGGCAGAAATGTATTCAGAGTACCTCTCAACTTGCAGTAAATTAGCTCGCGGTGGCATCCTCACATCAACTGGGTTTTATAAGTGTCTTAGGTAACTCGCACAGCTC
Arid2	Ins 2 AG	9306	3585	22	98	40	128	24	2575	82	584	CAGCTTAACATAGGGCTTCCTGTGGTATATAATGTCTTTATTCCTCTCTCTCTCTCTTTTAGGCTAAATGCTCATTTTGAAGTAAATCCAGAC|{AG}TGTTCCGTCTCTCGGGCAGAAATGTATTCAGAGTACCTCTCAACTTGCAGTAAATTAGCTCGCGGTGGCATCCTCACATCAACTGGGTTTTATAAGTGTCTTAGGTAACTCGCACAGCTC
Arid2	Del 0|2	9351	3694	——	——	30	123	38	2374	124	1229	CAGCTTAACATAGGGCTTCCTGTGGTATATAATGTCTTTATTCCTCTCTCTCTCTCTTTTAGGCTAAATGCTCATTTTGAAGTAAATCCAGAC|--TTCCGTCTCTCGGGCAGAAATGTATTCAGAGTACCTCTCAACTTGCAGTAAATTAGCTCGCGGTGGCATCCTCACATCAACTGGGTTTTATAAGTGTCTTAGGTAACTCGCACAGCTC
Arid2	Ins 1 T	8828	4970	45	79	52	111	13979	10680	29906	8779	CAGCTTAACATAGGGCTTCCTGTGGTATATAATGTCTTTATTCCTCTCTCTCTCTCTTTTAGGCTAAATGCTCATTTTGAAGTAAATCCAGAC|{T}TGTTCCGTCTCTCGGGCAGAAATGTATTCAGAGTACCTCTCAACTTGCAGTAAATTAGCTCGCGGTGGCATCCTCACATCAACTGGGTTTTATAAGTGTCTTAGGTAACTCGCACAGCTC
Arid2	Del 0|6	292	1859	——	——	——	——	——	——	——	——	CAGCTTAACATAGGGCTTCCTGTGGTATATAATGTCTTTATTCCTCTCTCTCTCTCTTTTAGGCTAAATGCTCATTTTGAAGTAAATCCAGAC|T------TCTCTCGGGCAGAAATGTATTCAGAGTACCTCTCAACTTGCAGTAAATTAGCTCGCGGTGGCATCCTCACATCAACTGGGTTTTATAAGTGTCTTAGGTAACTCGCACAGCTC
Atm	WT	148526	96445	20159	62101	45729	63241	112174	75825	115511	118058	TCTGTCATTCATTGGTGAAGAAATCAAAGTAGAAAAACATTGAGCGACTGCTCTAAAGTCCTATTATTCCCATTTTCTTAAACATCATGTTTTTCCTTTCTGCAGGTTTTAGAGAAAGTCTCCGAATC|GTTTGGATGTAGAAGTTTAGAAGACTTCATGATTTCTCACCTAGACTACCTGGTTTTGGAATGGCTGAACCTTCAAGATACTG
Atm	Del 3|0	3586	21619	18970	39773	40928	24971	2920	23082	6855	27410	TCTGTCATTCATTGGTGAAGAAATCAAAGTAGAAAAACATTGAGCGACTGCTCTAAAGTCCTATTATTCCCATTTTCTTAAACATCATGTTTTTCCTTTCTGCAGGTTTTAGAGAAAGTCTCCGA---|GTTTGGATGTAGAAGTTTAGAAGACTTCATGATTTCTCACCTAGACTACCTGGTTTTGGAATGGCTGAACCTTCAAGATACTG
Atm	Del 4|0	465	2838	——	——	394	2280	511	2971	393	5935	TCTGTCATTCATTGGTGAAGAAATCAAAGTAGAAAAACATTGAGCGACTGCTCTAAAGTCCTATTATTCCCATTTTCTTAAACATCATGTTTTTCCTTTCTGCAGGTTTTAGAGAAAGTCTCCG----|GTTTGGATGTAGAAGTTTAGAAGACTTCATGATTTCTCACCTAGACTACCTGGTTTTGGAATGGCTGAACCTTCAAGATACTG
Atm	Del 5|0	——	——	——	——	17	242	——	——	——	——	TCTGTCATTCATTGGTGAAGAAATCAAAGTAGAAAAACATTGAGCGACTGCTCTAAAGTCCTATTATTCCCATTTTCTTAAACATCATGTTTTTCCTTTCTGCAGGTTTTAGAGAAAGTCTCC-----|GTTTGGATGTAGAAGTTTAGAAGACTTCATGATTTCTCACCTAGACTACCTGGTTTTGGAATGGCTGAACCTTCAAGATACTG
Atm	Ins 1 C	——	——	——	——	49	269	60	692	10	640	TCTGTCATTCATTGGTGAAGAAATCAAAGTAGAAAAACATTGAGCGACTGCTCTAAAGTCCTATTATTCCCATTTTCTTAAACATCATGTTTTTCCTTTCTGCAGGTTTTAGAGAAAGTCTCCGAATC{C}|GTTTGGATGTAGAAGTTTAGAAGACTTCATGATTTCTCACCTAGACTACCTGGTTTTGGAATGGCTGAACCTTCAAGATACTG
Axin1	WT	343	2163	——	——	——	——	——	——	——	——	GTTCTGAGGCCCGTCATCTGGTCCCTGCCTCAGCCAATAGGCGGCAGGAGCCCGAGCTGCAGCCTAGAGTCACGCTTCTGCCTCCCAGCCACACAGTGGCCAAGAGCAGG|GACCGGCTTCCTAGAGTGGCTGAAAGTGCTCGGACGGACAGCCAAGCCCATCATGGCGGACAGCGGGACAGTGGGTCGTGATCAGGCACTTGGAGCCAGGCAGGTGAGGTAA
Axin1	Del 1|0	94636	10524	14953	1913	21241	54	11265	1	10647	2524	GTTCTGAGGCCCGTCATCTGGTCCCTGCCTCAGCCAATAGGCGGCAGGAGCCCGAGCTGCAGCCTAGAGTCACGCTTCTGCCTCCCAGCCACACAGTGGCCAAGAGCAG-|GACCGGCTTCCTAGAGTGGCTGAAAGTGCTCGGACGGACAGCCAAGCCCATCATGGCGGACAGCGGGACAGTGGGTCGTGATCAGGCACTTGGAGCCAGGCAGGTGAGGTAA
Axin1	Del 3|0	263	970	——	——	——	——	——	——	——	——	GTTCTGAGGCCCGTCATCTGGTCCCTGCCTCAGCCAATAGGCGGCAGGAGCCCGAGCTGCAGCCTAGAGTCACGCTTCTGCCTCCCAGCCACACAGTGGCCAAGAGC---|GACCGGCTTCCTAGAGTGGCTGAAAGTGCTCGGACGGACAGCCAAGCCCATCATGGCGGACAGCGGGACAGTGGGTCGTGATCAGGCACTTGGAGCCAGGCAGGTGAGGTAA
Axin1	Del 12|0	——	——	13543	1972	19989	9	214	19	547	1119	GTTCTGAGGCCCGTCATCTGGTCCCTGCCTCAGCCAATAGGCGGCAGGAGCCCGAGCTGCAGCCTAGAGTCACGCTTCTGCCTCCCAGCCACACAGTG------------|GACCGGCTTCCTAGAGTGGCTGAAAGTGCTCGGACGGACAGCCAAGCCCATCATGGCGGACAGCGGGACAGTGGGTCGTGATCAGGCACTTGGAGCCAGGCAGGTGAGGTAA
Axin1	Ins 1 G	——	——	——	——	——	——	5642	0	5182	852	GTTCTGAGGCCCGTCATCTGGTCCCTGCCTCAGCCAATAGGCGGCAGGAGCCCGAGCTGCAGCCTAGAGTCACGCTTCTGCCTCCCAGCCACACAGTGGCCAAGAGCAGG{G}|GACCGGCTTCCTAGAGTGGCTGAAAGTGCTCGGACGGACAGCCAAGCCCATCATGGCGGACAGCGGGACAGTGGGTCGTGATCAGGCACTTGGAGCCAGGCAGGTGAGGTAA
Cdkn2a	WT	——	——	91	314	333	1299	137	1584	238	1825	CAGGTGATGATGATGGGCAACGTTCACGTAGCAGCTCTTCTGCTCAACTACGGTGCAGATTCGAACTGCGAGGACCCCACTACCTTCTCCCGCCC|GGTGCACGACGCAGCGCGGGAAGGCTTCCTGGACACGCTGGTGGTGCTGCACGGGTCAGGGGCTCGGCTGGATGTGCGCGATGCCTGGGGTCGCCTGCCGCTCGACTTGGCCCAAGA
Cdkn2a	Del 0|1	11904	2918	446	781	2827	6893	3426	10452	8143	9430	CAGGTGATGATGATGGGCAACGTTCACGTAGCAGCTCTTCTGCTCAACTACGGTGCAGATTCGAACTGCGAGGACCCCACTACCTTCTCCCGCCC|-GTGCACGACGCAGCGCGGGAAGGCTTCCTGGACACGCTGGTGGTGCTGCACGGGTCAGGGGCTCGGCTGGATGTGCGCGATGCCTGGGGTCGCCTGCCGCTCGACTTGGCCCAAGA
Cdkn2a	Del 0|5	1758	1055	9007	6680	19493	4808	575	6220	2407	5654	CAGGTGATGATGATGGGCAACGTTCACGTAGCAGCTCTTCTGCTCAACTACGGTGCAGATTCGAACTGCGAGGACCCCACTACCTTCTCCCGCCC|-----ACGACGCAGCGCGGGAAGGCTTCCTGGACACGCTGGTGGTGCTGCACGGGTCAGGGGCTCGGCTGGATGTGCGCGATGCCTGGGGTCGCCTGCCGCTCGACTTGGCCCAAGA
Cdkn2a	Del 0|7	1960	1038	9312	7374	20721	4992	2236	7976	17265	8067	CAGGTGATGATGATGGGCAACGTTCACGTAGCAGCTCTTCTGCTCAACTACGGTGCAGATTCGAACTGCGAGGACCCCACTACCTTCTCCCGCCC|-------GACGCAGCGCGGGAAGGCTTCCTGGACACGCTGGTGGTGCTGCACGGGTCAGGGGCTCGGCTGGATGTGCGCGATGCCTGGGGTCGCCTGCCGCTCGACTTGGCCCAAGA
Cdkn2a	Ins 1 G	5395	1354	164	391	1056	2208	609	3440	400	3059	CAGGTGATGATGATGGGCAACGTTCACGTAGCAGCTCTTCTGCTCAACTACGGTGCAGATTCGAACTGCGAGGACCCCACTACCTTCTCCCGCCC|{G}GGTGCACGACGCAGCGCGGGAAGGCTTCCTGGACACGCTGGTGGTGCTGCACGGGTCAGGGGCTCGGCTGGATGTGCGCGATGCCTGGGGTCGCCTGCCGCTCGACTTGGCCCAAGA
Cdkn2a	Del 2|36	651	1348	371	1304	1379	6163	652	6899	1100	7813	CAGGTGATGATGATGGGCAACGTTCACGTAGCAGCTCTTCTGCTCAACTACGGTGCAGATTCGAACTGCGAGGACCCCACTACCTTCTCCCGC--|------------------------------------GCTGGTGGTGCTGCACGGGTCAGGGGCTCGGCTGGATGTGCGCGATGCCTGGGGTCGCCTGCCGCTCGACTTGGCCCAAGA
Cdkn2a	Del 0|6	——	——	240	1205	926	4656	380	5918	810	5738	CAGGTGATGATGATGGGCAACGTTCACGTAGCAGCTCTTCTGCTCAACTACGGTGCAGATTCGAACTGCGAGGACCCCACTACCTTCTCCCGCCC|------CGACGCAGCGCGGGAAGGCTTCCTGGACACGCTGGTGGTGCTGCACGGGTCAGGGGCTCGGCTGGATGTGCGCGATGCCTGGGGTCGCCTGCCGCTCGACTTGGCCCAAGA
Cdkn2a	Ins 26bp	——	——	——	——	——	——	2586	6596	11827	2365	CAGGTGATGATGATGGGCAACGTTCACGTAGCAGCTCTTCTGCTCAACTACGGTGCAGATTCGAACTGCGAGGACCCCACTACCTTCTCCCGCCC| {TGGCAATCCTGCTGATTGGCCCGATT}GGTGCACGACGCAGCGCGGGAAGGCTTCCTGGACACGCTGGTGGTGCTGCACGGGTCAGGGGCTCGGCTGGATGTGCGCGATGCCTGGGGTCGCCTGCCGCTCGACTTGGCCCAAGA
Cdkn2a	Del 0|3	——	——	——	——	——	——	1096	1429	6106	1031	CAGGTGATGATGATGGGCAACGTTCACGTAGCAGCTCTTCTGCTCAACTACGGTGCAGATTCGAACTGCGAGGACCCCACTACCTTCTCCCGCCC|---GCACGACGCAGCGCGGGAAGGCTTCCTGGACACGCTGGTGGTGCTGCACGGGTCAGGGGCTCGGCTGGATGTGCGCGATGCCTGGGGTCGCCTGCCGCTCGACTTGGCCCAAGA
Chd1	WT	221	0	——	——	——	——	——	——	——	——	AGCGACTCTGATTCTGGCTCTGACTCAGGAAGTCAATCAGAGTCTGAATCAGACACATCCCGAGAGAACAAGGTTCAAGCAAAACCACCAAAAGT|CGACGGAGCCGAGGTAAGTTAGTGCAATTGAACTGGCTTAAGACAGAAGTTAAATCTTATAACTGACTGGACAGTGTCATGGCCTGGGCATATAGCGCAGCAGTACAGCAC
Chd1	Ins 1 T	556	30	——	——	——	——	8756	1	15822	9	AGCGACTCTGATTCTGGCTCTGACTCAGGAAGTCAATCAGAGTCTGAATCAGACACATCCCGAGAGAACAAGGTTCAAGCAAAACCACCAAAAGT{T}|CGACGGAGCCGAGGTAAGTTAGTGCAATTGAACTGGCTTAAGACAGAAGTTAAATCTTATAACTGACTGGACAGTGTCATGGCCTGGGCATATAGCGCAGCAGTACAGCAC
Chd1	Del 29|13	96	13	18245	130	17943	32	99	5	125	1	AGCGACTCTGATTCTGGCTCTGACTCAGGAAGTCAATCAGAGTCTGAATCAGACACATCCCGAGAG----------------------------- | -------------GTAAGTTAGTGCAATTGAACTGGCTTAAGACAGAAGTTAAATCTTATAACTGACTGGACAGTGTCATGGCCTGGGCATATAGCGCAGCAGTACAGCAC
Chd1	Del 18|23	63	6	18040	125	17177	22	119	5	95	2	AGCGACTCTGATTCTGGCTCTGACTCAGGAAGTCAATCAGAGTCTGAATCAGACACATCCCGAGAGAACAAGGTTCA------------------ | -----------------------GCAATTGAACTGGCTTAAGACAGAAGTTAAATCTTATAACTGACTGGACAGTGTCATGGCCTGGGCATATAGCGCAGCAGTACAGCAC
Col1a1	WT	1889	2214	609	2139	1292	9142	664	5544	1689	3453	AGTCCAAGACCTTCTCCCAGCATGAAGAGGATGCTAAACCCGTGGTAATAAGGCCAAGGCTGTGGCCCTGATGCGTCTGTGACTTCTCTCCACTTAGGGTCCTTCCGGTGA|ACGTGGTGCTCCCGGACCTGCTGGTCCCAAAGGTTCTCCTGGTGAAGCTGGTCGCCCCGGTGAAGCTGGTCTCCCTGGTGCCAAGGTGAGAAGATCCTCTGTCCTGTATGG
Col1a1	Ins 1 T	78578	13311	2026	769	2401	7077	767	7050	2345	4620	AGTCCAAGACCTTCTCCCAGCATGAAGAGGATGCTAAACCCGTGGTAATAAGGCCAAGGCTGTGGCCCTGATGCGTCTGTGACTTCTCTCCACTTAGGGTCCTTCCGGTGA{T}|ACGTGGTGCTCCCGGACCTGCTGGTCCCAAAGGTTCTCCTGGTGAAGCTGGTCGCCCCGGTGAAGCTGGTCTCCCTGGTGCCAAGGTGAGAAGATCCTCTGTCCTGTATGG
Col1a1	Del 1|3	5913	6218	1818	5866	3030	17516	1723	8021	4342	5672	AGTCCAAGACCTTCTCCCAGCATGAAGAGGATGCTAAACCCGTGGTAATAAGGCCAAGGCTGTGGCCCTGATGCGTCTGTGACTTCTCTCCACTTAGGGTCCTTCCGGTG-|---TGGTGCTCCCGGACCTGCTGGTCCCAAAGGTTCTCCTGGTGAAGCTGGTCGCCCCGGTGAAGCTGGTCTCCCTGGTGCCAAGGTGAGAAGATCCTCTGTCCTGTATGG
Col1a1	Del 6|2	1525	12771	46339	39751	40388	18835	3841	12871	7868	10047	AGTCCAAGACCTTCTCCCAGCATGAAGAGGATGCTAAACCCGTGGTAATAAGGCCAAGGCTGTGGCCCTGATGCGTCTGTGACTTCTCTCCACTTAGGGTCCTTC------ | --GTGGTGCTCCCGGACCTGCTGGTCCCAAAGGTTCTCCTGGTGAAGCTGGTCGCCCCGGTGAAGCTGGTCTCCCTGGTGCCAAGGTGAGAAGATCCTCTGTCCTGTATGG
Col1a1	Del 9|4	1708	9347	48295	37052	43487	21271	3966	9118	8540	4653	AGTCCAAGACCTTCTCCCAGCATGAAGAGGATGCTAAACCCGTGGTAATAAGGCCAAGGCTGTGGCCCTGATGCGTCTGTGACTTCTCTCCACTTAGGGTCC--------- | ----GGTGCTCCCGGACCTGCTGGTCCCAAAGGTTCTCCTGGTGAAGCTGGTCGCCCCGGTGAAGCTGGTCTCCCTGGTGCCAAGGTGAGAAGATCCTCTGTCCTGTATGG
Col1a1	Del 1|0	5844	5716	1721	6598	3260	19408	32659	22871	70451	13910	AGTCCAAGACCTTCTCCCAGCATGAAGAGGATGCTAAACCCGTGGTAATAAGGCCAAGGCTGTGGCCCTGATGCGTCTGTGACTTCTCTCCACTTAGGGTCCTTCCGGTG-|ACGTGGTGCTCCCGGACCTGCTGGTCCCAAAGGTTCTCCTGGTGAAGCTGGTCGCCCCGGTGAAGCTGGTCTCCCTGGTGCCAAGGTGAGAAGATCCTCTGTCCTGTATGG
Col1a1	Del 4|0	——	——	——	——	——	——	1	419	——	——	AGTCCAAGACCTTCTCCCAGCATGAAGAGGATGCTAAACCCGTGGTAATAAGGCCAAGGCTGTGGCCCTGATGCGTCTGTGACTTCTCTCCACTTAGGGTCCTTCCG----|ACGTGGTGCTCCCGGACCTGCTGGTCCCAAAGGTTCTCCTGGTGAAGCTGGTCGCCCCGGTGAAGCTGGTCTCCCTGGTGCCAAGGTGAGAAGATCCTCTGTCCTGTATGG
Col1a1	Del 2|0	——	——	——	——	——	——	——	——	17073	2550	AGTCCAAGACCTTCTCCCAGCATGAAGAGGATGCTAAACCCGTGGTAATAAGGCCAAGGCTGTGGCCCTGATGCGTCTGTGACTTCTCTCCACTTAGGGTCCTTCCGGT--|ACGTGGTGCTCCCGGACCTGCTGGTCCCAAAGGTTCTCCTGGTGAAGCTGGTCGCCCCGGTGAAGCTGGTCTCCCTGGTGCCAAGGTGAGAAGATCCTCTGTCCTGTATGG
Dlc1	WT	1422	311	728	7248	4441	2074	1456	377	11894	413	ACGAAAGCATGCTGACAGACCTCAGCGAGCACCAGGAGGTGGCCTCTGTCCGAAGCCTCAGCAGCACCAGCAGCAGCGTCCCCACCCACGCAGCCCACAGTGGAGATGCCACTACGCCCCGAAC|CAATTCCGTCATCAGCGTCTGCTCCTCCGGACACTTTGTAGGCAATGATGACTCTTTTTCCAGCCTGCCGTCTCCCAAGGAACTGTCCAGCTTCAGT
Dlc1	Del 1|0	15668	678	5003	5638	22487	2153	20159	497	47972	391	ACGAAAGCATGCTGACAGACCTCAGCGAGCACCAGGAGGTGGCCTCTGTCCGAAGCCTCAGCAGCACCAGCAGCAGCGTCCCCACCCACGCAGCCCACAGTGGAGATGCCACTACGCCCCGAA-|CAATTCCGTCATCAGCGTCTGCTCCTCCGGACACTTTGTAGGCAATGATGACTCTTTTTCCAGCCTGCCGTCTCCCAAGGAACTGTCCAGCTTCAGT
Dlc1	Del 0|16	6759	199	367	147	278	417	——	——	——	——	ACGAAAGCATGCTGACAGACCTCAGCGAGCACCAGGAGGTGGCCTCTGTCCGAAGCCTCAGCAGCACCAGCAGCAGCGTCCCCACCCACGCAGCCCACAGTGGAGATGCCACTACGCCCCGAAC|----------------GTCTGCTCCTCCGGACACTTTGTAGGCAATGATGACTCTTTTTCCAGCCTGCCGTCTCCCAAGGAACTGTCCAGCTTCAGT
Dlc1	Del 4|34	513	184	4632	5141	22248	859	141	47	——	——	ACGAAAGCATGCTGACAGACCTCAGCGAGCACCAGGAGGTGGCCTCTGTCCGAAGCCTCAGCAGCACCAGCAGCAGCGTCCCCACCCACGCAGCCCACAGTGGAGATGCCACTACGCCCC---- | ----------------------------------TTTGTAGGCAATGATGACTCTTTTTCCAGCCTGCCGTCTCCCAAGGAACTGTCCAGCTTCAGT
Fbxw7	WT	92722	67418	57759	64920	63272	80992	5137	20147	28364	46044	GTGTGAGTATGCCTTCCCTATTTCCTTTTCCATAGTTGGCACTCTATGTGCTTTCATTCCTGGAACCCAAAGACCTGCTGCAAGCGGCTCAGACTTGTCGA|TACTGGAGAATTTTGGCTGAGGATAACCTTCTCTGGAGAGAGAAATGTAAAGAAGAGGGTAAGTTCAGAATCACACACAGATGTGTTTCTACTCTGGAAACAAGTTAACAGAATAACTTGGCTGTGAGTGAGAGT
Fbxw7	Del 12|11	38	1933	38028	41878	42097	8788	1668	3222	8180	15031	GTGTGAGTATGCCTTCCCTATTTCCTTTTCCATAGTTGGCACTCTATGTGCTTTCATTCCTGGAACCCAAAGACCTGCTGCAAGCGGCT------------|-----------TTTGGCTGAGGATAACCTTCTCTGGAGAGAGAAATGTAAAGAAGAGGGTAAGTTCAGAATCACACACAGATGTGTTTCTACTCTGGAAACAAGTTAACAGAATAACTTGGCTGTGAGTGAGAGT
Fbxw7	Del 2|0	0	1460	——	——	259	2617	——	——	——	——	GTGTGAGTATGCCTTCCCTATTTCCTTTTCCATAGTTGGCACTCTATGTGCTTTCATTCCTGGAACCCAAAGACCTGCTGCAAGCGGCTCAGACTTGTC--|TACTGGAGAATTTTGGCTGAGGATAACCTTCTCTGGAGAGAGAAATGTAAAGAAGAGGGTAAGTTCAGAATCACACACAGATGTGTTTCTACTCTGGAAACAAGTTAACAGAATAACTTGGCTGTGAGTGAGAGT
Fbxw7	Ins 1 A	——	——	——	——	13	433	——	——	27	849	GTGTGAGTATGCCTTCCCTATTTCCTTTTCCATAGTTGGCACTCTATGTGCTTTCATTCCTGGAACCCAAAGACCTGCTGCAAGCGGCTCAGACTTGTCGA{A}|TACTGGAGAATTTTGGCTGAGGATAACCTTCTCTGGAGAGAGAAATGTAAAGAAGAGGGTAAGTTCAGAATCACACACAGATGTGTTTCTACTCTGGAAACAAGTTAACAGAATAACTTGGCTGTGAGTGAGAGT
Fbxw7	Del 3|0	——	——	——	——	——	——	19270	15926	41160	3161	GTGTGAGTATGCCTTCCCTATTTCCTTTTCCATAGTTGGCACTCTATGTGCTTTCATTCCTGGAACCCAAAGACCTGCTGCAAGCGGCTCAGACTTGT---|TACTGGAGAATTTTGGCTGAGGATAACCTTCTCTGGAGAGAGAAATGTAAAGAAGAGGGTAAGTTCAGAATCACACACAGATGTGTTTCTACTCTGGAAACAAGTTAACAGAATAACTTGGCTGTGAGTGAGAGT
Fbxw7	Del 0|2	——	——	——	——	——	——	263	1164	1216	1752	GTGTGAGTATGCCTTCCCTATTTCCTTTTCCATAGTTGGCACTCTATGTGCTTTCATTCCTGGAACCCAAAGACCTGCTGCAAGCGGCTCAGACTTGTCGA|--CTGGAGAATTTTGGCTGAGGATAACCTTCTCTGGAGAGAGAAATGTAAAGAAGAGGGTAAGTTCAGAATCACACACAGATGTGTTTCTACTCTGGAAACAAGTTAACAGAATAACTTGGCTGTGAGTGAGAGT
Fbxw7	Del 0|5	——	——	——	——	——	——	20023	24117	38817	7308	GTGTGAGTATGCCTTCCCTATTTCCTTTTCCATAGTTGGCACTCTATGTGCTTTCATTCCTGGAACCCAAAGACCTGCTGCAAGCGGCTCAGACTTGTCGA|-----GAGAATTTTGGCTGAGGATAACCTTCTCTGGAGAGAGAAATGTAAAGAAGAGGGTAAGTTCAGAATCACACACAGATGTGTTTCTACTCTGGAAACAAGTTAACAGAATAACTTGGCTGTGAGTGAGAGT
Hic1	WT	1471	336	66	18	76	0	76	0	——	——	CTACGCTCCTTACGGGCGGCCCGGCCGGGGCTTGAGGGCTGCCACGCCCGTCATCCAGGCTTGCTACTCGTCCCCGGCCGGGCCACCGCCGCCGCCTGCCGCCGAGCCGCCGTCG|GGCCCCGATGCAGCCGTCAACACCCACTGCGCTGAGCTATATGCTTCAGGCCCGGGCCCAGCAGCCTCACTCTGCGCCCCGGAGCGTCGCTGCTCCCCGCTTTG
Hic1	Del 1|0	432	281	26754	44	32565	2	1494	0	1743	0	CTACGCTCCTTACGGGCGGCCCGGCCGGGGCTTGAGGGCTGCCACGCCCGTCATCCAGGCTTGCTACTCGTCCCCGGCCGGGCCACCGCCGCCGCCTGCCGCCGAGCCGCCGTC-|GGCCCCGATGCAGCCGTCAACACCCACTGCGCTGAGCTATATGCTTCAGGCCCGGGCCCAGCAGCCTCACTCTGCGCCCCGGAGCGTCGCTGCTCCCCGCTTTG
Hic1	Ins 1 G	——	——	——	——	——	——	138	0	570	0	CTACGCTCCTTACGGGCGGCCCGGCCGGGGCTTGAGGGCTGCCACGCCCGTCATCCAGGCTTGCTACTCGTCCCCGGCCGGGCCACCGCCGCCGCCTGCCGCCGAGCCGCCGTCG|{G}GGCCCCGATGCAGCCGTCAACACCCACTGCGCTGAGCTATATGCTTCAGGCCCGGGCCCAGCAGCCTCACTCTGCGCCCCGGAGCGTCGCTGCTCCCCGCTTTG
Hnf1a	WT	23076	892	16325	56508	48719	1366	12428	42	20181	3	GCCCTACCTGATGGTTGGAGAGGGTCCCCTGGACAAGGGGGAGTCCTGCGGTGGGAGTCGAGGGGACCTGACCGAGTTGCCTAATGGCCTTGG|AGAAACGCGTGGCTCTGAAGATGACACGGATGACGATGGGGAAGACTTCGCGCCACCCATTCTGAAAGAGCTGGAGAACCTCAGCCCAGAGGAGGCAGCCCACCAGAAAGCCGTGGTGGAGTCA
Keap1	WT	7171	15	10587	21	2030	113	1012	0	9455	0	CTTCTACGTGCAGGCACTGCTGCGGGCCGTGCGCTGCCATGCGCTCACGCCGCGCTTCCTGCAGACGCAGCTGCAGAAGTGTGAGATCCTGCAGGCCGACG|CGCGCTGCAAGGACTACCTGGTGCAGATATTCCAGGAGCTCACGCTGCACAAGCCCACGCAGGCAGTGCCCTGCCGCGCGCCCAAAGTGGGCCGCCTCATCTACACAGCGGGCGGTTACTTCCGACAGTCGCT
Keap1	Del 2|1	——	——	——	——	5236	320	4316	0	13340	0	CTTCTACGTGCAGGCACTGCTGCGGGCCGTGCGCTGCCATGCGCTCACGCCGCGCTTCCTGCAGACGCAGCTGCAGAAGTGTGAGATCCTGCAGGCCGA--|-GCGCTGCAAGGACTACCTGGTGCAGATATTCCAGGAGCTCACGCTGCACAAGCCCACGCAGGCAGTGCCCTGCCGCGCGCCCAAAGTGGGCCGCCTCATCTACACAGCGGGCGGTTACTTCCGACAGTCGCT
Keap1	Del 8|9	——	——	——	——	——	——	658	0	——	——	CTTCTACGTGCAGGCACTGCTGCGGGCCGTGCGCTGCCATGCGCTCACGCCGCGCTTCCTGCAGACGCAGCTGCAGAAGTGTGAGATCCTGCA--------|---------AGGACTACCTGGTGCAGATATTCCAGGAGCTCACGCTGCACAAGCCCACGCAGGCAGTGCCCTGCCGCGCGCCCAAAGTGGGCCGCCTCATCTACACAGCGGGCGGTTACTTCCGACAGTCGCT
Kmt2a	WT	——	——	630	4265	1596	319	850	1	228	12	AGTTGCTGGCTCAGAAGATGCCGAGCCTCTTGCTCCTCCCATCAAACCAATTAAGCCTGTCACCAGAAACAAGGCACCTCAGGAGCCTCCGGTGAAGAAAGGGCGGCGATCA|AGGCGGTGCGGACAATGTCCTGGCTGCCAGGTGCCTGAGGACTGTGGCATTTGCACTAATTGCCTGGACAAGCCCAAGTTTGGTGGCCGCAATATA
Kmt2a	Del 6|0	18208	0	19315	9972	19046	332	760	3	130	16	AGTTGCTGGCTCAGAAGATGCCGAGCCTCTTGCTCCTCCCATCAAACCAATTAAGCCTGTCACCAGAAACAAGGCACCTCAGGAGCCTCCGGTGAAGAAAGGGCGG------|AGGCGGTGCGGACAATGTCCTGGCTGCCAGGTGCCTGAGGACTGTGGCATTTGCACTAATTGCCTGGACAAGCCCAAGTTTGGTGGCCGCAATATA
Kmt2a	Ins 1 A	17709	12	——	——	712	50	270	0	938	1	AGTTGCTGGCTCAGAAGATGCCGAGCCTCTTGCTCCTCCCATCAAACCAATTAAGCCTGTCACCAGAAACAAGGCACCTCAGGAGCCTCCGGTGAAGAAAGGGCGGCGATCA{A}|AGGCGGTGCGGACAATGTCCTGGCTGCCAGGTGCCTGAGGACTGTGGCATTTGCACTAATTGCCTGGACAAGCCCAAGTTTGGTGGCCGCAATATA
Kmt2a	Del 7|0	19661	6	——	——	716	99	230	0	——	——	AGTTGCTGGCTCAGAAGATGCCGAGCCTCTTGCTCCTCCCATCAAACCAATTAAGCCTGTCACCAGAAACAAGGCACCTCAGGAGCCTCCGGTGAAGAAAGGGC-------A|AGGCGGTGCGGACAATGTCCTGGCTGCCAGGTGCCTGAGGACTGTGGCATTTGCACTAATTGCCTGGACAAGCCCAAGTTTGGTGGCCGCAATATA
Kmt2a	Del 4|0	340	64	451	1700	2727	312	160	0	180	0	AGTTGCTGGCTCAGAAGATGCCGAGCCTCTTGCTCCTCCCATCAAACCAATTAAGCCTGTCACCAGAAACAAGGCACCTCAGGAGCCTCCGGTGAAGAAAGGGCGGCG----|AGGCGGTGCGGACAATGTCCTGGCTGCCAGGTGCCTGAGGACTGTGGCATTTGCACTAATTGCCTGGACAAGCCCAAGTTTGGTGGCCGCAATATA
Kmt2a	Del 3|0	0	85	329	1971	1506	218	——	——	1878	0	AGTTGCTGGCTCAGAAGATGCCGAGCCTCTTGCTCCTCCCATCAAACCAATTAAGCCTGTCACCAGAAACAAGGCACCTCAGGAGCCTCCGGTGAAGAAAGGGCGGCGA---|AGGCGGTGCGGACAATGTCCTGGCTGCCAGGTGCCTGAGGACTGTGGCATTTGCACTAATTGCCTGGACAAGCCCAAGTTTGGTGGCCGCAATATA
Kmt2a	Del 20|2	——	——	18574	11177	18299	406	750	0	139	1	AGTTGCTGGCTCAGAAGATGCCGAGCCTCTTGCTCCTCCCATCAAACCAATTAAGCCTGTCACCAGAAACAAGGCACCTCAGGAGCCTCCGG--------------------|--GCGGTGCGGACAATGTCCTGGCTGCCAGGTGCCTGAGGACTGTGGCATTTGCACTAATTGCCTGGACAAGCCCAAGTTTGGTGGCCGCAATATA
Kmt2a	Del 3|0 Ins 2 GA	——	——	——	——	——	——	——	——	2831	16	AGTTGCTGGCTCAGAAGATGCCGAGCCTCTTGCTCCTCCCATCAAACCAATTAAGCCTGTCACCAGAAACAAGGCACCTCAGGAGCCTCCGGTGAAGAAAGGGCGGCGA---{GA}|AGGCGGTGCGGACAATGTCCTGGCTGCCAGGTGCCTGAGGACTGTGGCATTTGCACTAATTGCCTGGACAAGCCCAAGTTTGGTGGCCGCAATATA
Kmt2a	Del 1|0	——	——	——	——	——	——	——	——	3050	1	AGTTGCTGGCTCAGAAGATGCCGAGCCTCTTGCTCCTCCCATCAAACCAATTAAGCCTGTCACCAGAAACAAGGCACCTCAGGAGCCTCCGGTGAAGAAAGGGCGGCGAT-A|AGGCGGTGCGGACAATGTCCTGGCTGCCAGGTGCCTGAGGACTGTGGCATTTGCACTAATTGCCTGGACAAGCCCAAGTTTGGTGGCCGCAATATA
Kmt2c	WT	38113	62902	202	4441	1268	4088	3009	2860	8285	2451	CTCATGCCAAACCAGGATCCTTTTTTGCAAGCAGCACAAAACCGAGTACCAGGTTTACCTGGCCCTTTGATAAGGCCACCTGATACATGCTCCCAGACTCCCAGGCCACCTGGGCCTGGC|CGTATAGACACATTCACTCATGCTTCCTCATCTGCTGTTCGTGATCCATATGATCAGCCTCCAGTGACTCCCAGGCCTCATTCTGAGTCTTTCG
Kmt2c	Del 43|35	2	2443	196	1187	721	1801	109	299	247	325	CTCATGCCAAACCAGGATCCTTTTTTGCAAGCAGCACAAAACCGAGTACCAGGTTTACCTGGCCCTTTGATAAGGCC------------------------------------------- | -------------------------CCTCATCTGCTGTTCGTGATCCATATGATCAGCCTCCAGTGACTCCCAGGCCTCATTCTGAGTCTTTCG
Kmt2c	Del 0|5	26	7474	4318	9340	10983	4554	216	514	950	226	CTCATGCCAAACCAGGATCCTTTTTTGCAAGCAGCACAAAACCGAGTACCAGGTTTACCTGGCCCTTTGATAAGGCCACCTGATACATGCTCCCAGACTCCCAGGCCACCTGGGCCTGGC|-----AGACACATTCACTCATGCTTCCTCATCTGCTGTTCGTGATCCATATGATCAGCCTCCAGTGACTCCCAGGCCTCATTCTGAGTCTTTCG
Kmt2c	Del 0|2	——	——	——	——	——	——	3053	631	8949	909	CTCATGCCAAACCAGGATCCTTTTTTGCAAGCAGCACAAAACCGAGTACCAGGTTTACCTGGCCCTTTGATAAGGCCACCTGATACATGCTCCCAGACTCCCAGGCCACCTGGGCCTGGC|C--ATAGACACATTCACTCATGCTTCCTCATCTGCTGTTCGTGATCCATATGATCAGCCTCCAGTGACTCCCAGGCCTCATTCTGAGTCTTTCG
Kmt2c	Del 0|1	——	——	——	——	——	——	4653	3878	8813	576	CTCATGCCAAACCAGGATCCTTTTTTGCAAGCAGCACAAAACCGAGTACCAGGTTTACCTGGCCCTTTGATAAGGCCACCTGATACATGCTCCCAGACTCCCAGGCCACCTGGGCCTGGC|C-TATAGACACATTCACTCATGCTTCCTCATCTGCTGTTCGTGATCCATATGATCAGCCTCCAGTGACTCCCAGGCCTCATTCTGAGTCTTTCG
Lkb1	WT	15644	595	17572	17425	15466	17329	19331	276	24046	373	ATCGACTCCACCGAGGTAATCTACCAGCCGCGCCGCAAACGCGCCAAGCTCATCGGCAAGTACCTGATGGGGGACCTGCTCGGGGAGGGCTCGTACG|GCAAGGTGAAGGAGGTGCTGGACTCCGAGACCTTATGCCGCAGGGCGGTCAAGATCCTCAAGAAGAAAAAGCTGCGCAGGATCCCCAATGGAGAGGCCAACGTCAAGAAGTA
Lkb1	Del 10|0	443	169	26365	8774	17824	3167	2178	80	1453	37	ATCGACTCCACCGAGGTAATCTACCAGCCGCGCCGCAAACGCGCCAAGCTCATCGGCAAGTACCTGATGGGGGACCTGCTCGGGGAG----------|GCAAGGTGAAGGAGGTGCTGGACTCCGAGACCTTATGCCGCAGGGCGGTCAAGATCCTCAAGAAGAAAAAGCTGCGCAGGATCCCCAATGGAGAGGCCAACGTCAAGAAGTA
Lkb1	Ins 1 G	19459	320	490	910	990	1271	1287	36	1057	28	ATCGACTCCACCGAGGTAATCTACCAGCCGCGCCGCAAACGCGCCAAGCTCATCGGCAAGTACCTGATGGGGGACCTGCTCGGGGAGGGCTCGTACG{G}|GCAAGGTGAAGGAGGTGCTGGACTCCGAGACCTTATGCCGCAGGGCGGTCAAGATCCTCAAGAAGAAAAAGCTGCGCAGGATCCCCAATGGAGAGGCCAACGTCAAGAAGTA
Lkb1	Del 8|14	498	233	22274	7684	15747	2841	2153	39	1637	117	ATCGACTCCACCGAGGTAATCTACCAGCCGCGCCGCAAACGCGCCAAGCTCATCGGCAAGTACCTGATGGGGGACCTGCTCGGGGAGGG-------- | --------------GTGCTGGACTCCGAGACCTTATGCCGCAGGGCGGTCAAGATCCTCAAGAAGAAAAAGCTGCGCAGGATCCCCAATGGAGAGGCCAACGTCAAGAAGTA
Lkb1	Del 5|2	18936	340	485	1290	1218	1418	1598	53	1499	71	ATCGACTCCACCGAGGTAATCTACCAGCCGCGCCGCAAACGCGCCAAGCTCATCGGCAAGTACCTGATGGGGGACCTGCTCGGGGAGGGCTC-----|--AAGGTGAAGGAGGTGCTGGACTCCGAGACCTTATGCCGCAGGGCGGTCAAGATCCTCAAGAAGAAAAAGCTGCGCAGGATCCCCAATGGAGAGGCCAACGTCAAGAAGTA
Lkb1	Del 4|0	2899	125	3206	3365	2740	2888	23925	375	23786	257	ATCGACTCCACCGAGGTAATCTACCAGCCGCGCCGCAAACGCGCCAAGCTCATCGGCAAGTACCTGATGGGGGACCTGCTCGGGGAGGGCTCG----|GCAAGGTGAAGGAGGTGCTGGACTCCGAGACCTTATGCCGCAGGGCGGTCAAGATCCTCAAGAAGAAAAAGCTGCGCAGGATCCCCAATGGAGAGGCCAACGTCAAGAAGTA
Lkb1	Del 2|0	——	——	28	110	152	23	——	——	——	——	ATCGACTCCACCGAGGTAATCTACCAGCCGCGCCGCAAACGCGCCAAGCTCATCGGCAAGTACCTGATGGGGGACCTGCTCGGGGAGGGCTCGT--G|GCAAGGTGAAGGAGGTGCTGGACTCCGAGACCTTATGCCGCAGGGCGGTCAAGATCCTCAAGAAGAAAAAGCTGCGCAGGATCCCCAATGGAGAGGCCAACGTCAAGAAGTA
Lkb1	Del 1|0	——	——	——	——	——	——	21098	400	21964	38	ATCGACTCCACCGAGGTAATCTACCAGCCGCGCCGCAAACGCGCCAAGCTCATCGGCAAGTACCTGATGGGGGACCTGCTCGGGGAGGGCTCGTAC-|GCAAGGTGAAGGAGGTGCTGGACTCCGAGACCTTATGCCGCAGGGCGGTCAAGATCCTCAAGAAGAAAAAGCTGCGCAGGATCCCCAATGGAGAGGCCAACGTCAAGAAGTA
Lkb1	Del 1|0	——	——	——	——	——	——	10212	101	9565	31	ATCGACTCCACCGAGGTAATCTACCAGCCGCGCCGCAAACGCGCCAAGCTCATCGGCAAGTACCTGATGGGGGACCTGCTCGGGGAGGGCTCGTA-G|GCAAGGTGAAGGAGGTGCTGGACTCCGAGACCTTATGCCGCAGGGCGGTCAAGATCCTCAAGAAGAAAAAGCTGCGCAGGATCCCCAATGGAGAGGCCAACGTCAAGAAGTA
Mlh1	WT	——	——	——	——	——	——	——	——	160	1	ATGTGCTAAAACCTGGCCTTTTTTACTCTTTTCTCTCTTGAAACAGACCTTGCTTCCAGGACTTGCTGGGCCTTCTGGGGAGGCAGCTAGACCCACGA|CAGGGGTGGCTTCCTCATCCACTAGTGGAAGTGGCGACAAGGTCTACGCTTACCAGATGGTCCGTACGGACTCCCGGGAGCAGAAGCTTGACGCCTTTCTGCAGCCTGTAAG
Mlh1	Del 2|0	461	23	——	——	——	——	——	——	——	——	ATGTGCTAAAACCTGGCCTTTTTTACTCTTTTCTCTCTTGAAACAGACCTTGCTTCCAGGACTTGCTGGGCCTTCTGGGGAGGCAGCTAGACCCAC--|CAGGGGTGGCTTCCTCATCCACTAGTGGAAGTGGCGACAAGGTCTACGCTTACCAGATGGTCCGTACGGACTCCCGGGAGCAGAAGCTTGACGCCTTTCTGCAGCCTGTAAG
Mlh1	Del 8|0	460	21	——	——	——	——	——	——	——	——	ATGTGCTAAAACCTGGCCTTTTTTACTCTTTTCTCTCTTGAAACAGACCTTGCTTCCAGGACTTGCTGGGCCTTCTGGGGAGGCAGCTAG--------|CAGGGGTGGCTTCCTCATCCACTAGTGGAAGTGGCGACAAGGTCTACGCTTACCAGATGGTCCGTACGGACTCCCGGGAGCAGAAGCTTGACGCCTTTCTGCAGCCTGTAAG
Mlh1	Del 1|3	469	17	——	——	——	——	——	——	——	——	ATGTGCTAAAACCTGGCCTTTTTTACTCTTTTCTCTCTTGAAACAGACCTTGCTTCCAGGACTTGCTGGGCCTTCTGGGGAGGCAGCTAGACCCACG-|---GGGTGGCTTCCTCATCCACTAGTGGAAGTGGCGACAAGGTCTACGCTTACCAGATGGTCCGTACGGACTCCCGGGAGCAGAAGCTTGACGCCTTTCTGCAGCCTGTAAG
Mlh1	Del 4|0	51	42	——	——	——	——	30	0	——	——	ATGTGCTAAAACCTGGCCTTTTTTACTCTTTTCTCTCTTGAAACAGACCTTGCTTCCAGGACTTGCTGGGCCTTCTGGGGAGGCAGCTAGACCC----|CAGGGGTGGCTTCCTCATCCACTAGTGGAAGTGGCGACAAGGTCTACGCTTACCAGATGGTCCGTACGGACTCCCGGGAGCAGAAGCTTGACGCCTTTCTGCAGCCTGTAAG
Mlh1	Del 1|0	36	16	110	1	160	0	20	3	——	——	ATGTGCTAAAACCTGGCCTTTTTTACTCTTTTCTCTCTTGAAACAGACCTTGCTTCCAGGACTTGCTGGGCCTTCTGGGGAGGCAGCTAGACCCACG-|CAGGGGTGGCTTCCTCATCCACTAGTGGAAGTGGCGACAAGGTCTACGCTTACCAGATGGTCCGTACGGACTCCCGGGAGCAGAAGCTTGACGCCTTTCTGCAGCCTGTAAG
Mlh1	Del 18|5	——	——	1250	1	1490	4	——	——	——	——	ATGTGCTAAAACCTGGCCTTTTTTACTCTTTTCTCTCTTGAAACAGACCTTGCTTCCAGGACTTGCTGGGCCTTCT------------------ | -----GTGGCTTCCTCATCCACTAGTGGAAGTGGCGACAAGGTCTACGCTTACCAGATGGTCCGTACGGACTCCCGGGAGCAGAAGCTTGACGCCTTTCTGCAGCCTGTAAG
Mlh1	Del 28|5	——	——	1390	3	950	8	——	——	——	——	ATGTGCTAAAACCTGGCCTTTTTTACTCTTTTCTCTCTTGAAACAGACCTTGCTTCCAGGACTTGCTGGG---------------------------- | -----GTGGCTTCCTCATCCACTAGTGGAAGTGGCGACAAGGTCTACGCTTACCAGATGGTCCGTACGGACTCCCGGGAGCAGAAGCTTGACGCCTTTCTGCAGCCTGTAAG
Mlh1	Del 3|0	——	——	——	——	——	——	170	0	780	1	ATGTGCTAAAACCTGGCCTTTTTTACTCTTTTCTCTCTTGAAACAGACCTTGCTTCCAGGACTTGCTGGGCCTTCTGGGGAGGCAGCTAGACCCA---|CAGGGGTGGCTTCCTCATCCACTAGTGGAAGTGGCGACAAGGTCTACGCTTACCAGATGGTCCGTACGGACTCCCGGGAGCAGAAGCTTGACGCCTTTCTGCAGCCTGTAAG
Mlh1	Del 0|1	——	——	——	——	——	——	260	0	290	0	ATGTGCTAAAACCTGGCCTTTTTTACTCTTTTCTCTCTTGAAACAGACCTTGCTTCCAGGACTTGCTGGGCCTTCTGGGGAGGCAGCTAGACCCACGA|CA-GGGTGGCTTCCTCATCCACTAGTGGAAGTGGCGACAAGGTCTACGCTTACCAGATGGTCCGTACGGACTCCCGGGAGCAGAAGCTTGACGCCTTTCTGCAGCCTGTAAG
Mst1	WT	457	3827	54	938	429	1479	167	760	456	832	TGGGGTCAATCAAGCCTAAGGAGGGAGTGATAGGCCTGCCCCCACTTAGAAGTGCATTGGCCCTGTTTCCAGCTGTTTGTGTTCTGTGCAACGGTGAGGATTA|CCGTGGCGAGGTAGACGTTACAGAGTCAGGGCGGGAGTGTCAACGCTGGGACCTGCAGCACCCCCACTCGCACCCTTTCCAGCCTGAAAAGTATGTAGGCA
Mst1	Del 1|0	8223	5654	1046	4576	3362	2657	1665	1515	4401	761	TGGGGTCAATCAAGCCTAAGGAGGGAGTGATAGGCCTGCCCCCACTTAGAAGTGCATTGGCCCTGTTTCCAGCTGTTTGTGTTCTGTGCAACGGTGAGGATT-|CCGTGGCGAGGTAGACGTTACAGAGTCAGGGCGGGAGTGTCAACGCTGGGACCTGCAGCACCCCCACTCGCACCCTTTCCAGCCTGAAAAGTATGTAGGCA
Mst1	Del 31|23	66	1059	443	3165	2644	642	97	301	404	135	TGGGGTCAATCAAGCCTAAGGAGGGAGTGATAGGCCTGCCCCCACTTAGAAGTGCATTGGCCCTGTTTCCAG------------------------------- | -----------------------AGTCAGGGCGGGAGTGTCAACGCTGGGACCTGCAGCACCCCCACTCGCACCCTTTCCAGCCTGAAAAGTATGTAGGCA
Mst1	Del 3|0	3849	2001	——	——	135	744	48	207	——	——	TGGGGTCAATCAAGCCTAAGGAGGGAGTGATAGGCCTGCCCCCACTTAGAAGTGCATTGGCCCTGTTTCCAGCTGTTTGTGTTCTGTGCAACGGTGAGGA---|CCGTGGCGAGGTAGACGTTACAGAGTCAGGGCGGGAGTGTCAACGCTGGGACCTGCAGCACCCCCACTCGCACCCTTTCCAGCCTGAAAAGTATGTAGGCA
Mst1	Del 4|6	——	——	——	——	44	157	——	——	——	——	TGGGGTCAATCAAGCCTAAGGAGGGAGTGATAGGCCTGCCCCCACTTAGAAGTGCATTGGCCCTGTTTCCAGCTGTTTGTGTTCTGTGCAACGGTGAGG----|------CGAGGTAGACGTTACAGAGTCAGGGCGGGAGTGTCAACGCTGGGACCTGCAGCACCCCCACTCGCACCCTTTCCAGCCTGAAAAGTATGTAGGCA
Mst1	Ins 1 A	——	——	——	——	——	——	1195	596	2615	87	TGGGGTCAATCAAGCCTAAGGAGGGAGTGATAGGCCTGCCCCCACTTAGAAGTGCATTGGCCCTGTTTCCAGCTGTTTGTGTTCTGTGCAACGGTGAGGATTA{A}|CCGTGGCGAGGTAGACGTTACAGAGTCAGGGCGGGAGTGTCAACGCTGGGACCTGCAGCACCCCCACTCGCACCCTTTCCAGCCTGAAAAGTATGTAGGCA
Mst1	Del 5|1	——	——	——	——	——	——	774	416	1292	571	TGGGGTCAATCAAGCCTAAGGAGGGAGTGATAGGCCTGCCCCCACTTAGAAGTGCATTGGCCCTGTTTCCAGCTGTTTGTGTTCTGTGCAACGGTGAG-----|-CGTGGCGAGGTAGACGTTACAGAGTCAGGGCGGGAGTGTCAACGCTGGGACCTGCAGCACCCCCACTCGCACCCTTTCCAGCCTGAAAAGTATGTAGGCA
Msx1	WT	43525	5723	165	71	718	43	4596	607	6456	2202	TCATGGCCGATCACAGGAAGCCCGGGGCCAAGGAGAGCGTCCTGGTGGCCTCCGAAGGGGCTCAGGCAGCGGGTGGCTCGGTGCAGCACTTGGGCACCCGGCCCGGGT|CTCTGGGCGCCCCGGATGCGCCCTCCTCGCCGCGGCCTCTCGGCCATTTCTCAGTCGGAGGACTCCTCAAGCTGCCAGAAGATGCTCTGGTGAAGGCCGAAAGCCCCGAGAAACTAGA
Msx1	Del 0|2	358	303	1018	89	3793	35	2276	5323	6494	7253	TCATGGCCGATCACAGGAAGCCCGGGGCCAAGGAGAGCGTCCTGGTGGCCTCCGAAGGGGCTCAGGCAGCGGGTGGCTCGGTGCAGCACTTGGGCACCCGGCCCGGGT|--CTGGGCGCCCCGGATGCGCCCTCCTCGCCGCGGCCTCTCGGCCATTTCTCAGTCGGAGGACTCCTCAAGCTGCCAGAAGATGCTCTGGTGAAGGCCGAAAGCCCCGAGAAACTAGA
Msx1	Del 19|22	575	710	2572	202	6961	161	314	18844	743	19282	TCATGGCCGATCACAGGAAGCCCGGGGCCAAGGAGAGCGTCCTGGTGGCCTCCGAAGGGGCTCAGGCAGCGGGTGGCTCGGTGCAGCAC------------------- | ----------------------CTCCTCGCCGCGGCCTCTCGGCCATTTCTCAGTCGGAGGACTCCTCAAGCTGCCAGAAGATGCTCTGGTGAAGGCCGAAAGCCCCGAGAAACTAGA
Msx1	Del 0|3	——	——	——	——	——	——	2732	47	6614	0	TCATGGCCGATCACAGGAAGCCCGGGGCCAAGGAGAGCGTCCTGGTGGCCTCCGAAGGGGCTCAGGCAGCGGGTGGCTCGGTGCAGCACTTGGGCACCCGGCCCGGGT|---TGGGCGCCCCGGATGCGCCCTCCTCGCCGCGGCCTCTCGGCCATTTCTCAGTCGGAGGACTCCTCAAGCTGCCAGAAGATGCTCTGGTGAAGGCCGAAAGCCCCGAGAAACTAGA
Nf1	WT	24356	13132	10221	18053	22384	5101	11673	40348	15958	36868	GACTGTGTGGAGGGATTATGTTTTAAATGTAGGATGTGTGGCTGTGGCTATTGGCCTGACTGTGTGTTTCTTTAGGTGTATGGTGCTACTTACCTACAAAAGCTCTTGGACCCTTT|ATTACGAGTCATCATCACATCTTCGGATTGGCAACATGTTAGCTTTGAAGTGGATCCTACCAGGTTTGTCATCTTGTCACAGTTGCTCCCTCACTC
Nf1	Del 22|13	277	1083	9337	4096	19353	948	49	571	165	1899	GACTGTGTGGAGGGATTATGTTTTAAATGTAGGATGTGTGGCTGTGGCTATTGGCCTGACTGTGTGTTTCTTTAGGTGTATGGTGCTACTTACC----------------------|-------------ATCATCACATCTTCGGATTGGCAACATGTTAGCTTTGAAGTGGATCCTACCAGGTTTGTCATCTTGTCACAGTTGCTCCCTCACTC
Nf1	Ins 1 A	——	——	40	426	——	——	58	1215	77	1365	GACTGTGTGGAGGGATTATGTTTTAAATGTAGGATGTGTGGCTGTGGCTATTGGCCTGACTGTGTGTTTCTTTAGGTGTATGGTGCTACTTACCTACAAAAGCTCTTGGACCCTTT|{A}ATTACGAGTCATCATCACATCTTCGGATTGGCAACATGTTAGCTTTGAAGTGGATCCTACCAGGTTTGTCATCTTGTCACAGTTGCTCCCTCACTC
Nf1	Del 2|3	——	——	——	——	——	——	5669	730	5809	580	GACTGTGTGGAGGGATTATGTTTTAAATGTAGGATGTGTGGCTGTGGCTATTGGCCTGACTGTGTGTTTCTTTAGGTGTATGGTGCTACTTACCTACAAAAGCTCTTGGACCCT--|---ACGAGTCATCATCACATCTTCGGATTGGCAACATGTTAGCTTTGAAGTGGATCCTACCAGGTTTGTCATCTTGTCACAGTTGCTCCCTCACTC
Nf1	Del 0|2	——	——	——	——	——	——	——	——	19	523	GACTGTGTGGAGGGATTATGTTTTAAATGTAGGATGTGTGGCTGTGGCTATTGGCCTGACTGTGTGTTTCTTTAGGTGTATGGTGCTACTTACCTACAAAAGCTCTTGGACCCTTT|--TACGAGTCATCATCACATCTTCGGATTGGCAACATGTTAGCTTTGAAGTGGATCCTACCAGGTTTGTCATCTTGTCACAGTTGCTCCCTCACTC
Nf1	Del 0|3	——	——	——	——	——	——	——	——	8	159	GACTGTGTGGAGGGATTATGTTTTAAATGTAGGATGTGTGGCTGTGGCTATTGGCCTGACTGTGTGTTTCTTTAGGTGTATGGTGCTACTTACCTACAAAAGCTCTTGGACCCTTT|---ACGAGTCATCATCACATCTTCGGATTGGCAACATGTTAGCTTTGAAGTGGATCCTACCAGGTTTGTCATCTTGTCACAGTTGCTCCCTCACTC
Notch3	WT	73713	36546	25370	38695	26701	23773	415	6257	1606	13779	CATACGCTGTGAGAGCCAGGTGGATGAGTGCCGCAGCCAGCCCTGTCGATATGGGGGCAAATGTCTAGACTTGGTGGACAAGTACCTCTGCCGTTGTCC|TCCCGGAACCACAGGTGGGGCCTGGGGCTGGGCTATAACAGTACGTGGGGGTGTGTGGGGGTCTGTGATGAATTTGTAACTGGTGCTTGACAATAGTAGGTACTCTTGCCATACTTCTTCCCTCCCT
Notch3	Del 0|2	9798	9010	23547	11738	25254	9890	198	549	432	4238	CATACGCTGTGAGAGCCAGGTGGATGAGTGCCGCAGCCAGCCCTGTCGATATGGGGGCAAATGTCTAGACTTGGTGGACAAGTACCTCTGCCGTTGTCC|--CCGGAACCACAGGTGGGGCCTGGGGCTGGGCTATAACAGTACGTGGGGGTGTGTGGGGGTCTGTGATGAATTTGTAACTGGTGCTTGACAATAGTAGGTACTCTTGCCATACTTCTTCCCTCCCT
Notch3	Del 1|0	——	——	——	——	63	511	23401	18771	22534	15270	CATACGCTGTGAGAGCCAGGTGGATGAGTGCCGCAGCCAGCCCTGTCGATATGGGGGCAAATGTCTAGACTTGGTGGACAAGTACCTCTGCCGTTGTC-|TCCCGGAACCACAGGTGGGGCCTGGGGCTGGGCTATAACAGTACGTGGGGGTGTGTGGGGGTCTGTGATGAATTTGTAACTGGTGCTTGACAATAGTAGGTACTCTTGCCATACTTCTTCCCTCCCT
Notch3	Del 6|5	——	——	——	——	50	442	——	——	——	——	CATACGCTGTGAGAGCCAGGTGGATGAGTGCCGCAGCCAGCCCTGTCGATATGGGGGCAAATGTCTAGACTTGGTGGACAAGTACCTCTGCCG------ | -----GAACCACAGGTGGGGCCTGGGGCTGGGCTATAACAGTACGTGGGGGTGTGTGGGGGTCTGTGATGAATTTGTAACTGGTGCTTGACAATAGTAGGTACTCTTGCCATACTTCTTCCCTCCCT
Notch3	Del 0|1	——	——	——	——	——	——	8142	6735	7503	6043	CATACGCTGTGAGAGCCAGGTGGATGAGTGCCGCAGCCAGCCCTGTCGATATGGGGGCAAATGTCTAGACTTGGTGGACAAGTACCTCTGCCGTTGTCC|-CCCGGAACCACAGGTGGGGCCTGGGGCTGGGCTATAACAGTACGTGGGGGTGTGTGGGGGTCTGTGATGAATTTGTAACTGGTGCTTGACAATAGTAGGTACTCTTGCCATACTTCTTCCCTCCCT
Notch3	Del 11|0	——	——	——	——	——	——	——	——	41	467	CATACGCTGTGAGAGCCAGGTGGATGAGTGCCGCAGCCAGCCCTGTCGATATGGGGGCAAATGTCTAGACTTGGTGGACAAGTACCTC-----------|TCCCGGAACCACAGGTGGGGCCTGGGGCTGGGCTATAACAGTACGTGGGGGTGTGTGGGGGTCTGTGATGAATTTGTAACTGGTGCTTGACAATAGTAGGTACTCTTGCCATACTTCTTCCCTCCCT
P53	WT	——	——	44	182	47	582	47202	48	64	7255	AGCCATAGGGGTTTGTTTGTTTGTATGTTTTTTAATTGACAAGTTATGCATCCATACAGTACACAATCTCTTCTCTCTACAGATGACTGCCATGGAGGAGTCACAGTCGGATATCAGCCTCGAGCTCCCTCTGA|GCCAGGAGACATTTTCAGGCTTATGGAAACTGTGAGTGGATCTTTTTGGGGCCCTTAAGATACATCCCGCCATACCTGTATCCTCCCCTTGCCTGAGAGAA
P53	Del 1|0	721	199	223	5457	278	7284	6331	10498	60623	14285	AGCCATAGGGGTTTGTTTGTTTGTATGTTTTTTAATTGACAAGTTATGCATCCATACAGTACACAATCTCTTCTCTCTACAGATGACTGCCATGGAGGAGTCACAGTCGGATATCAGCCTCGAGCTCCCTCTG-|GCCAGGAGACATTTTCAGGCTTATGGAAACTGTGAGTGGATCTTTTTGGGGCCCTTAAGATACATCCCGCCATACCTGTATCCTCCCCTTGCCTGAGAGAA
P53	Del 11|0	69	111	36776	40580	49776	78040	614	110	1289	14486	AGCCATAGGGGTTTGTTTGTTTGTATGTTTTTTAATTGACAAGTTATGCATCCATACAGTACACAATCTCTTCTCTCTACAGATGACTGCCATGGAGGAGTCACAGTCGGATATCAGCCTCGA-----------|GCCAGGAGACATTTTCAGGCTTATGGAAACTGTGAGTGGATCTTTTTGGGGCCCTTAAGATACATCCCGCCATACCTGTATCCTCCCCTTGCCTGAGAGAA
P53	Ins 1 A	738	171	161	5798	149	6602	11803	12233	1233	5114	AGCCATAGGGGTTTGTTTGTTTGTATGTTTTTTAATTGACAAGTTATGCATCCATACAGTACACAATCTCTTCTCTCTACAGATGACTGCCATGGAGGAGTCACAGTCGGATATCAGCCTCGAGCTCCCTCTGA{T}|GCCAGGAGACATTTTCAGGCTTATGGAAACTGTGAGTGGATCTTTTTGGGGCCCTTAAGATACATCCCGCCATACCTGTATCCTCCCCTTGCCTGAGAGAA
P53	Del 2|0	138	88	——	——	——	——	——	——	87194	22617	AGCCATAGGGGTTTGTTTGTTTGTATGTTTTTTAATTGACAAGTTATGCATCCATACAGTACACAATCTCTTCTCTCTACAGATGACTGCCATGGAGGAGTCACAGTCGGATATCAGCCTCGAGCTCCCTCT--|GCCAGGAGACATTTTCAGGCTTATGGAAACTGTGAGTGGATCTTTTTGGGGCCCTTAAGATACATCCCGCCATACCTGTATCCTCCCCTTGCCTGAGAGAA
P53	Del 0|5	——	——	39725	44309	50843	82313	708	266	——	——	AGCCATAGGGGTTTGTTTGTTTGTATGTTTTTTAATTGACAAGTTATGCATCCATACAGTACACAATCTCTTCTCTCTACAGATGACTGCCATGGAGGAGTCACAGTCGGATATCAGCCTCGAGCTCCCTCTGA|-----GAGACATTTTCAGGCTTATGGAAACTGTGAGTGGATCTTTTTGGGGCCCTTAAGATACATCCCGCCATACCTGTATCCTCCCCTTGCCTGAGAGAA
Pik3r1	WT	2661	13377	7178	16356	17904	25350	25789	39571	47246	44716	AGTGTGTGGTTACTCAAAGTTGAAAAGTAAGTATGGTCTTATACTGTGTTCATTTTAGGGAAGAAGTGAATGAAAAACTCCGAGACACTGCTGATGGGACCTTTT|TGGTACGAGACGCATCTACTAAAATGCACGGCGATTACACTCTTACACTAAGGTGAGCCAGGAAGTCAGCTGTAATTGCGATGTCTCAGTTGTCATGA
Pik3r1	Ins 1 T	59042	36942	612	11947	2915	23645	11840	28274	25033	32027	AGTGTGTGGTTACTCAAAGTTGAAAAGTAAGTATGGTCTTATACTGTGTTCATTTTAGGGAAGAAGTGAATGAAAAACTCCGAGACACTGCTGATGGGACCTTTT|{T}TGGTACGAGACGCATCTACTAAAATGCACGGCGATTACACTCTTACACTAAGGTGAGCCAGGAAGTCAGCTGTAATTGCGATGTCTCAGTTGTCATGA
Pik3r1	Del 3|0	1222	7919	13321	20331	31193	15835	534	13049	3095	14509	AGTGTGTGGTTACTCAAAGTTGAAAAGTAAGTATGGTCTTATACTGTGTTCATTTTAGGGAAGAAGTGAATGAAAAACTCCGAGACACTGCTGATGGGACCT---|TGGTACGAGACGCATCTACTAAAATGCACGGCGATTACACTCTTACACTAAGGTGAGCCAGGAAGTCAGCTGTAATTGCGATGTCTCAGTTGTCATGA
Pik3r1	Del 1|0	21414	16814	363	5673	1682	14555	460	12341	1939	10486	AGTGTGTGGTTACTCAAAGTTGAAAAGTAAGTATGGTCTTATACTGTGTTCATTTTAGGGAAGAAGTGAATGAAAAACTCCGAGACACTGCTGATGGGACCTTT-|TGGTACGAGACGCATCTACTAAAATGCACGGCGATTACACTCTTACACTAAGGTGAGCCAGGAAGTCAGCTGTAATTGCGATGTCTCAGTTGTCATGA
Pik3r1	Del 0|3	——	——	——	——	139	1599	83	2852	231	1728	AGTGTGTGGTTACTCAAAGTTGAAAAGTAAGTATGGTCTTATACTGTGTTCATTTTAGGGAAGAAGTGAATGAAAAACTCCGAGACACTGCTGATGGGACCTTTT|---TACGAGACGCATCTACTAAAATGCACGGCGATTACACTCTTACACTAAGGTGAGCCAGGAAGTCAGCTGTAATTGCGATGTCTCAGTTGTCATGA
Pten	Del 4|0	4659	0	——	——	——	——	834	0	1298	0	CTTTTGTCTCCCTCCTCCCTCTGCCCCCTGGGCCTATCAGGGAGTCACAATTCCCAGTCAGAGGCGCTATGTATATTATTATAGCTACCTGCTAAAAAATCACCTGGATTAC----|CCGTGGCACTGCTGTTTCACAAGATGATGTTTGAAACTATTCCAATGTTCAGTGGCGGAACTTGCAGTAAGTGCTCTAAATTCTTAGCTGTCTGTGTGTCGGA
Pten	Del 1|0	3303	53	512	50	2790	10	2564	0	2368	0	CTTTTGTCTCCCTCCTCCCTCTGCCCCCTGGGCCTATCAGGGAGTCACAATTCCCAGTCAGAGGCGCTATGTATATTATTATAGCTACCTGCTAAAAAATCACCTGGATTACAGA-|CCGTGGCACTGCTGTTTCACAAGATGATGTTTGAAACTATTCCAATGTTCAGTGGCGGAACTTGCAGTAAGTGCTCTAAATTCTTAGCTGTCTGTGTGTCGGA
Pten	Del 44|15	——	——	454	244	2609	120	——	——	——	——	CTTTTGTCTCCCTCCTCCCTCTGCCCCCTGGGCCTATCAGGGAGTCACAATTCCCAGTCAGAGGCGCTATGT-------------------------------------------- | ---------------TTCACAAGATGATGTTTGAAACTATTCCAATGTTCAGTGGCGGAACTTGCAGTAAGTGCTCTAAATTCTTAGCTGTCTGTGTGTCGGA
Pten	Del 9|1	——	——	——	——	——	——	1511	0	1175	0	CTTTTGTCTCCCTCCTCCCTCTGCCCCCTGGGCCTATCAGGGAGTCACAATTCCCAGTCAGAGGCGCTATGTATATTATTATAGCTACCTGCTAAAAAATCACCTGG---------|-CGTGGCACTGCTGTTTCACAAGATGATGTTTGAAACTATTCCAATGTTCAGTGGCGGAACTTGCAGTAAGTGCTCTAAATTCTTAGCTGTCTGTGTGTCGGA
Rasa1	WT	15	2	——	——	93	0	——	——	111	0	AGCGTGCCGGGTCAAGTTACCCGCGGCCCTGCCGGTGGCAGCCGCCCCGTGTCCCGGGCTGGCGGACGCCGACT|TGGTTGCGGCCCTCGGTGGCGGAGCCGCGTCGGGGTCCGGGTTCCTGGGGACCGGGCCGGTGGCCGGTGTCTTGGGGGGCGCCGCGCTGACCGGCAGTGCTGCTG
Rasa1	Del 1|0	1224	0	1238	20	23076	8	5129	0	16978	0	AGCGTGCCGGGTCAAGTTACCCGCGGCCCTGCCGGTGGCAGCCGCCCCGTGTCCCGGGCTGGCGGACGCCGACT|TGGTTGCGGCCCTCGGTGGCGGAGCCGCGTCGGGGTCCGGGTTCCTGGGGACCGGGCCGGTGGCCGGTGTCTTGGGGGGCGCCGCGCTGACCGGCAGTGCTGCTG
Rasa1	Ins 1 A	708	0	——	——	426	0	165	0	604	0	AGCGTGCCGGGTCAAGTTACCCGCGGCCCTGCCGGTGGCAGCCGCCCCGTGTCCCGGGCTGGCGGACGCCGACT|{A}TGGTTGCGGCCCTCGGTGGCGGAGCCGCGTCGGGGTCCGGGTTCCTGGGGACCGGGCCGGTGGCCGGTGTCTTGGGGGGCGCCGCGCTGACCGGCAGTGCTGCTG
Rasa1	Ins 1 T	151	0	——	——	——	——	——	——	——	——	AGCGTGCCGGGTCAAGTTACCCGCGGCCCTGCCGGTGGCAGCCGCCCCGTGTCCCGGGCTGGCGGACGCCGACT|{T}TGGTTGCGGCCCTCGGTGGCGGAGCCGCGTCGGGGTCCGGGTTCCTGGGGACCGGGCCGGTGGCCGGTGTCTTGGGGGGCGCCGCGCTGACCGGCAGTGCTGCTG
Rasa1	Del 12|22	——	——	68	0	12543	16	161	0	874	0	AGCGTGCCGGGTCAAGTTACCCGCGGCCCTGCCGGTGGCAGCCGCCCCGTGTCCCGGGCTGG------------|----------------------AGCCGCGTCGGGGTCCGGGTTCCTGGGGACCGGGCCGGTGGCCGGTGTCTTGGGGGGCGCCGCGCTGACCGGCAGTGCTGCTG
Rasa1	Del 0|3	——	——	——	——	——	——	3290	0	7588	0	AGCGTGCCGGGTCAAGTTACCCGCGGCCCTGCCGGTGGCAGCCGCCCCGTGTCCCGGGCTGGCGGACGCCGACT|---TTGCGGCCCTCGGTGGCGGAGCCGCGTCGGGGTCCGGGTTCCTGGGGACCGGGCCGGTGGCCGGTGTCTTGGGGGGCGCCGCGCTGACCGGCAGTGCTGCTG
Rb1	WT	770	2484	15	691	429	967	42	1653	163	2653	TACAGAAACAGCTGCAATCCCCATTAATGGTTCACCTCGAACACCCAGAAGAGGTCAGAACAGGAGCGCTCGGATAGCAAAACAACTAGAAAATGAT|ACGAGGATTATCGAGGTTCTCTGTAAAGAACACGAGTGTAATATAGATGAGGTAATTTCTCTTACACTTTATTTAAAACAGCTGAAGTAGATATATATGCTAAGTCTGCCTGTCA
Rb1	Del 2|0	18379	16245	1449	7526	6652	4092	2005	10975	5432	14361	TACAGAAACAGCTGCAATCCCCATTAATGGTTCACCTCGAACACCCAGAAGAGGTCAGAACAGGAGCGCTCGGATAGCAAAACAACTAGAAAAT--T|ACGAGGATTATCGAGGTTCTCTGTAAAGAACACGAGTGTAATATAGATGAGGTAATTTCTCTTACACTTTATTTAAAACAGCTGAAGTAGATATATATGCTAAGTCTGCCTGTCA
Rb1	Del 22|5	5142	12548	1348	5493	6262	3659	301	8227	1053	9270	TACAGAAACAGCTGCAATCCCCATTAATGGTTCACCTCGAACACCCAGAAGAGGTCAGAACAGGAGCGCTCGGAT----------------------|-----GATTATCGAGGTTCTCTGTAAAGAACACGAGTGTAATATAGATGAGGTAATTTCTCTTACACTTTATTTAAAACAGCTGAAGTAGATATATATGCTAAGTCTGCCTGTCA
Rb1	Ins 1 T	15085	9397	47	2886	785	1612	179	4945	748	5211	TACAGAAACAGCTGCAATCCCCATTAATGGTTCACCTCGAACACCCAGAAGAGGTCAGAACAGGAGCGCTCGGATAGCAAAACAACTAGAAAATGAT{T}|ACGAGGATTATCGAGGTTCTCTGTAAAGAACACGAGTGTAATATAGATGAGGTAATTTCTCTTACACTTTATTTAAAACAGCTGAAGTAGATATATATGCTAAGTCTGCCTGTCA
Rb1	Del 1|0	12309	3314	16	827	216	623	2978	1815	7076	5260	TACAGAAACAGCTGCAATCCCCATTAATGGTTCACCTCGAACACCCAGAAGAGGTCAGAACAGGAGCGCTCGGATAGCAAAACAACTAGAAAATG-T|ACGAGGATTATCGAGGTTCTCTGTAAAGAACACGAGTGTAATATAGATGAGGTAATTTCTCTTACACTTTATTTAAAACAGCTGAAGTAGATATATATGCTAAGTCTGCCTGTCA
Rb1	Del 6|21	——	——	——	——	——	——	1016	344	3550	2792	TACAGAAACAGCTGCAATCCCCATTAATGGTTCACCTCGAACACCCAGAAGAGGTCAGAACAGGAGCGCTCGGATAGCAAAACAACTAGAA------|---------------------TGTAAAGAACACGAGTGTAATATAGATGAGGTAATTTCTCTTACACTTTATTTAAAACAGCTGAAGTAGATATATATGCTAAGTCTGCCTGTCA
Rb1	Del 1|2	——	——	——	——	——	——	1041	199	2419	1732	TACAGAAACAGCTGCAATCCCCATTAATGGTTCACCTCGAACACCCAGAAGAGGTCAGAACAGGAGCGCTCGGATAGCAAAACAACTAGAAAATGA-|--GAGGATTATCGAGGTTCTCTGTAAAGAACACGAGTGTAATATAGATGAGGTAATTTCTCTTACACTTTATTTAAAACAGCTGAAGTAGATATATATGCTAAGTCTGCCTGTCA
Rps6ka3	WT	9160	6033	1141	8372	4649	7605	5022	8049	7989	13903	GAGAGTCATTCTGGGCTAACAATGGGTTGTCTCTATATTTACCTTAACAGGAAGAAGGCAGTATCAAAGAAATTGCAATCACACATCATGTGAAGGAAGGACATG|AAAAGGCAGATCCTTCCCAGTTTGAACTTTTAAAAGTATTAGGGCAGGGATCATTTGGAAAGGTAAGTCATAGTTGTTTGC
Rps6ka3	Del 0|5	1135	1352	230	1949	1012	1587	433	1744	927	3255	GAGAGTCATTCTGGGCTAACAATGGGTTGTCTCTATATTTACCTTAACAGGAAGAAGGCAGTATCAAAGAAATTGCAATCACACATCATGTGAAGGAAGGACATG|-----GCAGATCCTTCCCAGTTTGAACTTTTAAAAGTATTAGGGCAGGGATCATTTGGAAAGGTAAGTCATAGTTGTTTGC
Rps6ka3	Del 5|6	845	1860	4408	3856	8049	1834	553	2678	1683	4172	GAGAGTCATTCTGGGCTAACAATGGGTTGTCTCTATATTTACCTTAACAGGAAGAAGGCAGTATCAAAGAAATTGCAATCACACATCATGTGAAGGAAGG----- | ------CAGATCCTTCCCAGTTTGAACTTTTAAAAGTATTAGGGCAGGGATCATTTGGAAAGGTAAGTCATAGTTGTTTGC
Rps6ka3	Del 9|0	——	——	——	——	310	625	130	707	356	1339	GAGAGTCATTCTGGGCTAACAATGGGTTGTCTCTATATTTACCTTAACAGGAAGAAGGCAGTATCAAAGAAATTGCAATCACACATCATGTGAAGG---------|AAAAGGCAGATCCTTCCCAGTTTGAACTTTTAAAAGTATTAGGGCAGGGATCATTTGGAAAGGTAAGTCATAGTTGTTTGC
Runx3	WT	6052	5046	1457	5587	2961	1152	1717	9031	2674	3976	GACAGCCCCAACTTCCTCTGCTCCGTGCTGCCCTCGCACTGGCGCTGCAACAAGACGCTGCCGGTCGCCT|TCAAGGTGAGTGCAGGGGCCCGAGCCGGGAGGACACCGGGGAACCTGGGCGCCCCCATTTGCAGGAGCCCATACCGGGGAGGACTTGGGGAGCACCTAGAAGTAGGACATGAAAGGGGATGTCACCCAG
Runx3	Del 1|0	1627	1486	3312	6609	4240	809	4224	6176	5617	5329	GACAGCCCCAACTTCCTCTGCTCCGTGCTGCCCTCGCACTGGCGCTGCAACAAGACGCTGCCGGTCGCC-|TCAAGGTGAGTGCAGGGGCCCGAGCCGGGAGGACACCGGGGAACCTGGGCGCCCCCATTTGCAGGAGCCCATACCGGGGAGGACTTGGGGAGCACCTAGAAGTAGGACATGAAAGGGGATGTCACCCAG
Runx3	Del 8|13	657	403	444	1026	570	235	328	1252	420	592	GACAGCCCCAACTTCCTCTGCTCCGTGCTGCCCTCGCACTGGCGCTGCAACAAGACGCTGCC-------- | -------------AGGGGCCCGAGCCGGGAGGACACCGGGGAACCTGGGCGCCCCCATTTGCAGGAGCCCATACCGGGGAGGACTTGGGGAGCACCTAGAAGTAGGACATGAAAGGGGATGTCACCCAG
Runx3	Del 1|0	220	280	——	——	289	129	183	1592	181	430	GACAGCCCCAACTTCCTCTGCTCCGTGCTGCCCTCGCACTGGCGCTGCAACAAGACGCTGCCGGTCGC-T|TCAAGGTGAGTGCAGGGGCCCGAGCCGGGAGGACACCGGGGAACCTGGGCGCCCCCATTTGCAGGAGCCCATACCGGGGAGGACTTGGGGAGCACCTAGAAGTAGGACATGAAAGGGGATGTCACCCAG
Runx3	Del 3|0	2	259	——	——	——	——	——	——	——	——	GACAGCCCCAACTTCCTCTGCTCCGTGCTGCCCTCGCACTGGCGCTGCAACAAGACGCTGCCGGTCG---|TCAAGGTGAGTGCAGGGGCCCGAGCCGGGAGGACACCGGGGAACCTGGGCGCCCCCATTTGCAGGAGCCCATACCGGGGAGGACTTGGGGAGCACCTAGAAGTAGGACATGAAAGGGGATGTCACCCAG
Runx3	Del 0|2	——	——	——	——	——	——	951	470	615	115	GACAGCCCCAACTTCCTCTGCTCCGTGCTGCCCTCGCACTGGCGCTGCAACAAGACGCTGCCGGTCGCCT|--AAGGTGAGTGCAGGGGCCCGAGCCGGGAGGACACCGGGGAACCTGGGCGCCCCCATTTGCAGGAGCCCATACCGGGGAGGACTTGGGGAGCACCTAGAAGTAGGACATGAAAGGGGATGTCACCCAG
Setd5	WT	109840	34235	12864	75869	42089	65227	22616	71383	46398	142039	GCCCTGGTTTTAGTAGGTAATCGCTCAGAAGGAAAGTTTTAACTCCTGGGAAAGCCCCTTCTATGCTAATTTATTCTATCGGGCGCCTTTGCCTTTCTCATTCTTAGGAATAAGGATCTTTCTCCTGTG|TACTGATGCTGCAGCCCGCCCTGCTGGCCTGGGTCAGGGGTGCGTGGATGACCTGCATTTTCTGCTTTCTCATGTTACTTGTGTAACGTCTTCACC
Setd5	Del 2|0	——	——	7016	995	1718	441	——	——	——	——	GCCCTGGTTTTAGTAGGTAATCGCTCAGAAGGAAAGTTTTAACTCCTGGGAAAGCCCCTTCTATGCTAATTTATTCTATCGGGCGCCTTTGCCTTTCTCATTCTTAGGAATAAGGATCTTTCTCCTG--|TACTGATGCTGCAGCCCGCCCTGCTGGCCTGGGTCAGGGGTGCGTGGATGACCTGCATTTTCTGCTTTCTCATGTTACTTGTGTAACGTCTTCACC
Setd5	Del 0|5	——	——	1923	248	452	131	——	——	——	——	GCCCTGGTTTTAGTAGGTAATCGCTCAGAAGGAAAGTTTTAACTCCTGGGAAAGCCCCTTCTATGCTAATTTATTCTATCGGGCGCCTTTGCCTTTCTCATTCTTAGGAATAAGGATCTTTCTCCTGTG|-----ATGCTGCAGCCCGCCCTGCTGGCCTGGGTCAGGGGTGCGTGGATGACCTGCATTTTCTGCTTTCTCATGTTACTTGTGTAACGTCTTCACC
Setd5	Del 37|24	——	——	292	1794	877	1790	410	1954	1048	3864	GCCCTGGTTTTAGTAGGTAATCGCTCAGAAGGAAAGTTTTAACTCCTGGGAAAGCCCCTTCTATGCTAATTTATTCTATCGGGCGCCTTTGC------------------------------------- | ------------------------TGGCCTGGGTCAGGGGTGCGTGGATGACCTGCATTTTCTGCTTTCTCATGTTACTTGTGTAACGTCTTCACC
Setd5	Del 38|21	——	——	163	984	544	837	221	1158	609	2308	GCCCTGGTTTTAGTAGGTAATCGCTCAGAAGGAAAGTTTTAACTCCTGGGAAAGCCCCTTCTATGCTAATTTATTCTATCGGGCGCCTTTG------------------------------------- | ---------------------TGCTGGCCTGGGTCAGGGGTGCGTGGATGACCTGCATTTTCTGCTTTCTCATGTTACTTGTGTAACGTCTTCACC
Setd5	Del 37|21	——	——	125	777	400	795	199	800	519	1540	GCCCTGGTTTTAGTAGGTAATCGCTCAGAAGGAAAGTTTTAACTCCTGGGAAAGCCCCTTCTATGCTAATTTATTCTATCGGGCGCCTTTGC------------------------------------ | ---------------------TGCTGGCCTGGGTCAGGGGTGCGTGGATGACCTGCATTTTCTGCTTTCTCATGTTACTTGTGTAACGTCTTCACC
Setd5	Del 3|0	——	——	——	——	——	——	3688	27	1514	71	GCCCTGGTTTTAGTAGGTAATCGCTCAGAAGGAAAGTTTTAACTCCTGGGAAAGCCCCTTCTATGCTAATTTATTCTATCGGGCGCCTTTGCCTTTCTCATTCTTAGGAATAAGGATCTTTCTCCT---|TACTGATGCTGCAGCCCGCCCTGCTGGCCTGGGTCAGGGGTGCGTGGATGACCTGCATTTTCTGCTTTCTCATGTTACTTGTGTAACGTCTTCACC
Setd5	Del 0|1	——	——	——	——	——	——	3476	16	1461	53	GCCCTGGTTTTAGTAGGTAATCGCTCAGAAGGAAAGTTTTAACTCCTGGGAAAGCCCCTTCTATGCTAATTTATTCTATCGGGCGCCTTTGCCTTTCTCATTCTTAGGAATAAGGATCTTTCTCCTGTG|-ACTGATGCTGCAGCCCGCCCTGCTGGCCTGGGTCAGGGGTGCGTGGATGACCTGCATTTTCTGCTTTCTCATGTTACTTGTGTAACGTCTTCACC
Setd5	Del 1|6	——	——	——	——	——	——	2747	28	1801	41	GCCCTGGTTTTAGTAGGTAATCGCTCAGAAGGAAAGTTTTAACTCCTGGGAAAGCCCCTTCTATGCTAATTTATTCTATCGGGCGCCTTTGCCTTTCTCATTCTTAGGAATAAGGATCTTTCTCCTGT-|------TGCTGCAGCCCGCCCTGCTGGCCTGGGTCAGGGGTGCGTGGATGACCTGCATTTTCTGCTTTCTCATGTTACTTGTGTAACGTCTTCACC
Smad4	WT	11260	149	115	145	214	21	——	——	——	——	AGTACGTTCACGACTTTGAAGGACAGCCGTCCTTACCCACTGAAGGACATTCGATTCAAACCATCCAACACCCGCCAAGTAATCGCGCATCAACGGAGACGTACAGCG|CCCCGGCTCTGTTAGCCCCGGCAGAGTCTAACGCCACCAGCACCACCAACTTCCCCAACATTCCTGTGGCTTCCACAAGTGAGTGTTGCAGTCAGATCGAGTCGAAAGTTTTC
Smad4	Del 39|50	802	1286	5147	3503	2212	378	319	5	188	46	AGTACGTTCACGACTTTGAAGGACAGCCGTCCTTACCCACTGAAGGACATTCGATTCAAACCATCCAAC--------------------------------------- | --------------------------------------------------TTCCCCAACATTCCTGTGGCTTCCACAAGTGAGTGTTGCAGTCAGATCGAGTCGAAAGTTTTC
Smad4	Del 16|0	——	——	2873	453	2184	37	50	1	——	——	AGTACGTTCACGACTTTGAAGGACAGCCGTCCTTACCCACTGAAGGACATTCGATTCAAACCATCCAACACCCGCCAAGTAATCGCGCATCA----------------|CCCCGGCTCTGTTAGCCCCGGCAGAGTCTAACGCCACCAGCACCACCAACTTCCCCAACATTCCTGTGGCTTCCACAAGTGAGTGTTGCAGTCAGATCGAGTCGAAAGTTTTC
Smad4	Del 2|0	——	——	——	——	——	——	201	1	121	1	AGTACGTTCACGACTTTGAAGGACAGCCGTCCTTACCCACTGAAGGACATTCGATTCAAACCATCCAACACCCGCCAAGTAATCGCGCATCAACGGAGACGTACAG--|CCCCGGCTCTGTTAGCCCCGGCAGAGTCTAACGCCACCAGCACCACCAACTTCCCCAACATTCCTGTGGCTTCCACAAGTGAGTGTTGCAGTCAGATCGAGTCGAAAGTTTTC
Smad4	Del 1|0	——	——	——	——	——	——	229	5	132	1	AGTACGTTCACGACTTTGAAGGACAGCCGTCCTTACCCACTGAAGGACATTCGATTCAAACCATCCAACACCCGCCAAGTAATCGCGCATCAACGGAGACGTACAGC-|CCCCGGCTCTGTTAGCCCCGGCAGAGTCTAACGCCACCAGCACCACCAACTTCCCCAACATTCCTGTGGCTTCCACAAGTGAGTGTTGCAGTCAGATCGAGTCGAAAGTTTTC
Tet2	WT	110568	9092	6574	11414	7303	11832	99869	33165	156577	13488	CACCGTCACAATCACTTCTTGCTCCCCGTCTTGTTCTTCAGCCTCCTTTAGAAGGAAAAGGCGCTCTAAATGATGTAGCTTTGGAAGAACACCATGACTACCCCAAC|CGAAGCAACCGAACTCTTTTAAGGGAAGGGAAAATAGACCATCAACCCAAGACATCATCTAGCCAGAGTCTGAATCCATCTGTACATACACCCAACCCCCCCTTGATGCTTCCAGAACAGCAT
Tet2	Del 2|4	65388	4888	89247	23033	49570	6475	1730	1610	1391	7640	CACCGTCACAATCACTTCTTGCTCCCCGTCTTGTTCTTCAGCCTCCTTTAGAAGGAAAAGGCGCTCTAAATGATGTAGCTTTGGAAGAACACCATGACTACCCCA--|----GCAACCGAACTCTTTTAAGGGAAGGGAAAATAGACCATCAACCCAAGACATCATCTAGCCAGAGTCTGAATCCATCTGTACATACACCCAACCCCCCCTTGATGCTTCCAGAACAGCAT
Tet2	Del 0|9	4017	1279	107971	27174	61259	4617	827	1621	680	2897	CACCGTCACAATCACTTCTTGCTCCCCGTCTTGTTCTTCAGCCTCCTTTAGAAGGAAAAGGCGCTCTAAATGATGTAGCTTTGGAAGAACACCATGACTACCCCAAC|---------CGAACTCTTTTAAGGGAAGGGAAAATAGACCATCAACCCAAGACATCATCTAGCCAGAGTCTGAATCCATCTGTACATACACCCAACCCCCCCTTGATGCTTCCAGAACAGCAT
Tet2	Del 1|0	——	——	409	513	507	909	217	326	617	1262	CACCGTCACAATCACTTCTTGCTCCCCGTCTTGTTCTTCAGCCTCCTTTAGAAGGAAAAGGCGCTCTAAATGATGTAGCTTTGGAAGAACACCATGACTACCCCAA-|CGAAGCAACCGAACTCTTTTAAGGGAAGGGAAAATAGACCATCAACCCAAGACATCATCTAGCCAGAGTCTGAATCCATCTGTACATACACCCAACCCCCCCTTGATGCTTCCAGAACAGCAT
Tet2	Del 0|7	——	——	——	——	436	789	——	——	——	——	CACCGTCACAATCACTTCTTGCTCCCCGTCTTGTTCTTCAGCCTCCTTTAGAAGGAAAAGGCGCTCTAAATGATGTAGCTTTGGAAGAACACCATGACTACCCCAAC|-------ACCGAACTCTTTTAAGGGAAGGGAAAATAGACCATCAACCCAAGACATCATCTAGCCAGAGTCTGAATCCATCTGTACATACACCCAACCCCCCCTTGATGCTTCCAGAACAGCAT
Tsc1	WT	57674	785	660	3141	1526	972	2432	136	1281	111	TACTCTGCGACACAGAACATGCCCAGCATTTTCACTGTGCTTCCATTTCAGGAAGAAAGAGCAGATTCCTCAAGGCCTTACCTTCACAGACAGTCAAACGACCGAGG|ATTAGGTAAACTCCCTGGGTAATGATGGGCCTTGCTTGCCTCTTGGCATTGAACTCTGTAGCTTAAAAGCTAAGCTGGGTGGAAGAAGGATTTTCTGGGATAGCACCTATGCT
Tsc1	Del 5|3	188	171	11341	18539	30310	632	256	40	355	58	TACTCTGCGACACAGAACATGCCCAGCATTTTCACTGTGCTTCCATTTCAGGAAGAAAGAGCAGATTCCTCAAGGCCTTACCTTCACAGACAGTCAAACGAC-----|---AGGTAAACTCCCTGGGTAATGATGGGCCTTGCTTGCCTCTTGGCATTGAACTCTGTAGCTTAAAAGCTAAGCTGGGTGGAAGAAGGATTTTCTGGGATAGCACCTATGCT
Tsc1	Del 1|0	——	——	——	——	——	——	14444	3	15323	9	TACTCTGCGACACAGAACATGCCCAGCATTTTCACTGTGCTTCCATTTCAGGAAGAAAGAGCAGATTCCTCAAGGCCTTACCTTCACAGACAGTCAAACGACCGAG-|ATTAGGTAAACTCCCTGGGTAATGATGGGCCTTGCTTGCCTCTTGGCATTGAACTCTGTAGCTTAAAAGCTAAGCTGGGTGGAAGAAGGATTTTCTGGGATAGCACCTATGCT
Tsc1	Del 0|2	——	——	——	——	——	——	28222	33	15700	23	TACTCTGCGACACAGAACATGCCCAGCATTTTCACTGTGCTTCCATTTCAGGAAGAAAGAGCAGATTCCTCAAGGCCTTACCTTCACAGACAGTCAAACGACCGAGG|--TAGGTAAACTCCCTGGGTAATGATGGGCCTTGCTTGCCTCTTGGCATTGAACTCTGTAGCTTAAAAGCTAAGCTGGGTGGAAGAAGGATTTTCTGGGATAGCACCTATGCT
Tsc1	Del 8|11	——	——	——	——	——	——	24747	0	13799	33	TACTCTGCGACACAGAACATGCCCAGCATTTTCACTGTGCTTCCATTTCAGGAAGAAAGAGCAGATTCCTCAAGGCCTTACCTTCACAGACAGTCAAAC--------|-----------TCCCTGGGTAATGATGGGCCTTGCTTGCCTCTTGGCATTGAACTCTGTAGCTTAAAAGCTAAGCTGGGTGGAAGAAGGATTTTCTGGGATAGCACCTATGCT
Tsc2	WT	150	24	——	——	——	——	——	——	——	——	CTAAGGTCCCTGGAGGCTACACCCTTCTCACTGTCCCCTTTTTGTCATGGCAGCATGCAGTGGAGGCACTTTGGAAGGCTGTCTCAGACTTGCTACAGCCAGAGCGGCCAC|CAGAGGCCCGGCATGCAGTTCTCACCTTATTGAAGGCCATTGTACAGGGACAGGTAAGGGGTGGAGCTGTGTGAGCCTGTGGGATGAAGGCAGACCGTCACCGTTTGAGCTCCTGC
Tsc2	Del 3|0	30197	612	64	1	22	6	——	——	15	0	CTAAGGTCCCTGGAGGCTACACCCTTCTCACTGTCCCCTTTTTGTCATGGCAGCATGCAGTGGAGGCACTTTGGAAGGCTGTCTCAGACTTGCTACAGCCAGAGCGGC---|CAGAGGCCCGGCATGCAGTTCTCACCTTATTGAAGGCCATTGTACAGGGACAGGTAAGGGGTGGAGCTGTGTGAGCCTGTGGGATGAAGGCAGACCGTCACCGTTTGAGCTCCTGC
Tsc2	Del 2|0	1945	688	420	26	1492	53	560	1	99	0	CTAAGGTCCCTGGAGGCTACACCCTTCTCACTGTCCCCTTTTTGTCATGGCAGCATGCAGTGGAGGCACTTTGGAAGGCTGTCTCAGACTTGCTACAGCCAGAGCGGCC--|CAGAGGCCCGGCATGCAGTTCTCACCTTATTGAAGGCCATTGTACAGGGACAGGTAAGGGGTGGAGCTGTGTGAGCCTGTGGGATGAAGGCAGACCGTCACCGTTTGAGCTCCTGC
Tsc2	Del 0|3	15901	328	20	4	——	——	——	——	——	——	CTAAGGTCCCTGGAGGCTACACCCTTCTCACTGTCCCCTTTTTGTCATGGCAGCATGCAGTGGAGGCACTTTGGAAGGCTGTCTCAGACTTGCTACAGCCAGAGCGGCCAC|---AGGCCCGGCATGCAGTTCTCACCTTATTGAAGGCCATTGTACAGGGACAGGTAAGGGGTGGAGCTGTGTGAGCCTGTGGGATGAAGGCAGACCGTCACCGTTTGAGCTCCTGC
Tsc2	Del 1|0	15304	727	43	1	23	5	480	0	104	0	CTAAGGTCCCTGGAGGCTACACCCTTCTCACTGTCCCCTTTTTGTCATGGCAGCATGCAGTGGAGGCACTTTGGAAGGCTGTCTCAGACTTGCTACAGCCAGAGCGGCCA-|CAGAGGCCCGGCATGCAGTTCTCACCTTATTGAAGGCCATTGTACAGGGACAGGTAAGGGGTGGAGCTGTGTGAGCCTGTGGGATGAAGGCAGACCGTCACCGTTTGAGCTCCTGC
Tsc2	Del 12|0	——	——	6	0	——	——	——	——	——	——	CTAAGGTCCCTGGAGGCTACACCCTTCTCACTGTCCCCTTTTTGTCATGGCAGCATGCAGTGGAGGCACTTTGGAAGGCTGTCTCAGACTTGCTACAGC------------|CAGAGGCCCGGCATGCAGTTCTCACCTTATTGAAGGCCATTGTACAGGGACAGGTAAGGGGTGGAGCTGTGTGAGCCTGTGGGATGAAGGCAGACCGTCACCGTTTGAGCTCCTGC
Tsc2	Del 1|0	——	——	——	——	——	——	400	0	75	0	CTAAGGTCCCTGGAGGCTACACCCTTCTCACTGTCCCCTTTTTGTCATGGCAGCATGCAGTGGAGGCACTTTGGAAGGCTGTCTCAGACTTGCTACAGCCAGAGCGGCC-C|CAGAGGCCCGGCATGCAGTTCTCACCTTATTGAAGGCCATTGTACAGGGACAGGTAAGGGGTGGAGCTGTGTGAGCCTGTGGGATGAAGGCAGACCGTCACCGTTTGAGCTCCTGC

## Sheet: MF and Read Ratio
Target Gene	1-C3-1					1-C3-2					1-C3-3					6-C7-2					6-C7-4
	gDNA	%	eccDNA	%	Ratio	gDNA	%	eccDNA	%	Ratio	gDNA	%	eccDNA	%	Ratio	gDNA	%	eccDNA	%	Ratio	gDNA	%	eccDNA	%	Ratio
Apc	19522	1.26074	1019	0.154468	0.122522	18165	1.87007	7000	0.738045	0.394662	12498	0.994342	3274	0.41733	0.419705	12765	1.52632	3559	0.492891	0.322928	16401	1.18406	3347	0.38083	0.321631
Apob	23112	1.49258	7610	1.15358	0.772876	3627	0.373396	8333	0.87859	2.35297	9465	0.753036	968	0.123389	0.163855	5198	0.621528	1545	0.213969	0.344263	11740	0.847561	884	0.100584	0.118674
Arid1a	23513	1.51848	593	0.0898915	0.0591983	2718	0.279815	2114	0.22289	0.796559	5753	0.457709	168	0.0214146	0.0467865	1996	0.238663	64	0.00886344	0.0371379	4301	0.310508	371	0.0422133	0.135949
Arid1b	28879	1.86502	20095	3.04616	1.63331	7341	0.755748	416	0.0438609	0.0580364	13965	1.11106	191	0.0243464	0.0219128	1983	0.237108	29	0.00401625	0.0169384	5415	0.390932	182	0.0207084	0.0529719
Arid2	28984	1.8718	20180	3.05904	1.63428	2093	0.215472	2740	0.288892	1.34074	5214	0.414826	637	0.0811971	0.195738	20815	2.48886	27569	3.81807	1.53406	42449	3.06458	17796	2.02488	0.660736
Atm	152577	9.85349	120902	18.3273	1.85998	39129	4.02829	101874	10.7411	2.66641	87117	6.93103	91003	11.6	1.67363	115665	13.8301	102570	14.2051	1.02711	122769	8.86322	152043	17.2998	1.95187
Axin1	95242	6.15077	13657	2.07023	0.336581	28496	2.93363	3885	0.409615	0.139627	41230	3.28026	63	0.00803048	0.00244812	17121	2.04717	20	0.00276983	0.001353	16376	1.18225	4495	0.511453	0.432608
Cdkn2a	21668	1.39933	7713	1.1692	0.83554	19631	2.02099	18049	1.903	0.941615	46735	3.71824	31019	3.95393	1.06339	11697	1.39862	50514	6.99575	5.0019	48296	3.4867	44982	5.11817	1.46791
Chd1	936	0.0604473	49	0.0074278	0.122881	36285	3.7355	255	0.0268859	0.0071974	35120	2.79415	54	0.00688327	0.00246346	8974	1.07303	11	0.0015234	0.00141973	16042	1.15814	12	0.00136539	0.00117895
Col1a1	95457	6.16466	49577	7.51526	1.21909	100808	10.3781	92175	9.71847	0.936442	93858	7.46735	93249	11.8863	1.59176	43621	5.21579	65894	9.12575	1.74964	112308	8.108	44905	5.10941	0.630169
Dlc1	24362	1.57331	1372	0.207978	0.132192	10730	1.10464	18174	1.91617	1.73466	49454	3.93456	5503	0.701456	0.178281	21756	2.60138	921	0.12755	0.0490319	59866	4.32198	804	0.0914812	0.0211665
Fbxw7	92760	5.99048	70811	10.7341	1.79186	95787	9.86117	106798	11.2602	1.14188	105641	8.4048	92830	11.8328	1.40787	46361	5.54341	64576	8.94321	1.6133	117764	8.50189	74145	8.43641	0.992298
Hic1	1903	0.122897	617	0.0935296	0.761043	26820	2.76109	62	0.00653697	0.00236753	32641	2.59692	2	0.000254936	9.81685e-05	1708	0.204227	0	0	0	2313	0.166985	0	0	0
Hnf1a	23076	1.49026	892	0.135216	0.0907334	16325	1.68064	56508	5.95792	3.54503	48719	3.87609	1366	0.174121	0.0449219	12428	1.48602	42	0.00581663	0.00391423	20181	1.45695	3	0.000341348	0.000234289
Keap1	7171	0.463106	15	0.00227382	0.00490992	10587	1.08992	21	0.00221413	0.00203146	7266	0.578083	433	0.0551936	0.0954769	5986	0.71575	0	0	0	22795	1.64567	0	0	0
Kmt2a	55918	3.61121	167	0.0253152	0.00701016	39299	4.04579	29085	3.06658	0.757967	44602	3.54854	1736	0.221284	0.0623593	3020	0.361103	4	0.000553965	0.00153409	9374	0.676749	47	0.00534778	0.00790216
Kmt2c	38141	2.46316	72819	11.0385	4.48142	4716	0.485507	14968	1.57815	3.25052	12972	1.03205	10443	1.33115	1.28981	11040	1.32006	8182	1.13314	0.858398	27244	1.96686	4487	0.510543	0.259572
Lkb1	57879	3.73785	1782	0.270129	0.0722686	70420	7.24967	39558	4.1708	0.575309	54137	4.30714	28937	3.68854	0.856377	81782	9.77872	1360	0.188348	0.019261	85007	6.13702	952	0.108321	0.0176504
Mlh1	1477	0.0953853	119	0.0180389	0.189116	2750	0.28311	5	0.000527175	0.00186209	2600	0.206856	12	0.00152962	0.00739458	480	0.0573939	3	0.000415474	0.00723899	1230	0.088799	2	0.000227565	0.0025627
Mst1	12595	0.813391	12541	1.90106	2.33721	1543	0.15885	8679	0.91507	5.76058	6614	0.52621	5679	0.72389	1.37567	3946	0.471826	3795	0.525574	1.11392	9168	0.661877	2386	0.271485	0.410175
Msx1	44458	2.87112	6736	1.02109	0.355644	3755	0.386573	362	0.0381675	0.0987328	11472	0.912713	239	0.0304648	0.0333783	9918	1.1859	24821	3.43749	2.89863	20307	1.46605	28737	3.26977	2.23033
Nf1	24633	1.59081	14215	2.15482	1.35454	19598	2.01759	22575	2.38019	1.17972	41737	3.3206	6049	0.771054	0.232203	17449	2.08639	42864	5.93629	2.84525	22036	1.59087	41394	4.70992	2.96059
Notch3	83511	5.39318	45556	6.90573	1.28046	48917	5.03595	50433	5.3174	1.05589	52068	4.14253	34616	4.41243	1.06515	32156	3.84491	32312	4.47493	1.16386	32116	2.31859	39797	4.52821	1.953
P53	1666	0.107591	569	0.0862534	0.801678	76929	7.91976	96326	10.1561	1.28238	101093	8.04297	174821	22.2841	2.77063	66658	7.97034	23155	3.20677	0.402338	150403	10.8582	63757	7.25444	0.668104
Pik3r1	84339	5.44665	75052	11.377	2.0888	21474	2.21073	54307	5.72586	2.59003	53833	4.28296	80984	10.3229	2.41022	38706	4.6281	96087	13.3072	2.87531	77544	5.59823	103466	11.7726	2.10292
Pten	7962	0.51419	53	0.00803415	0.0156249	966	0.0994487	294	0.0309979	0.311697	5399	0.429545	130	0.0165708	0.0385777	4909	0.586972	0	0	0	4841	0.349493	0	0	0
Rasa1	2098	0.13549	2	0.000303175	0.00223763	1306	0.134451	20	0.0021087	0.0156837	36138	2.87514	24	0.00305923	0.00106403	8745	1.04564	0	0	0	26155	1.88824	0	0	0
Rb1	51685	3.33784	43988	6.66804	1.99771	2875	0.295978	17423	1.83699	6.20651	14344	1.14121	10953	1.39616	1.2234	7562	0.904193	28158	3.89964	4.31284	20441	1.47572	41279	4.69683	3.18273
Rps6ka3	11140	0.719426	9245	1.40143	1.94798	5779	0.594942	14177	1.49475	2.51243	14020	1.11543	11651	1.48513	1.33144	6138	0.733924	13178	1.82504	2.48668	10955	0.790889	22669	2.57934	3.26132
Runx3	8558	0.55268	7474	1.13297	2.04995	5213	0.536673	13222	1.39406	2.5976	8060	0.641254	2325	0.296363	0.462161	7403	0.885181	18521	2.565	2.89771	9507	0.686351	10442	1.18812	1.73106
Setd5	109840	7.09352	34235	5.18961	0.731598	22383	2.30431	80667	8.50512	3.69097	46080	3.66613	68426	8.72212	2.37911	33357	3.98852	75366	10.4375	2.6169	53350	3.85157	149916	17.0578	4.4288
Smad4	12062	0.77897	1435	0.217528	0.279251	8135	0.83749	4101	0.432389	0.516291	4619	0.367488	436	0.055576	0.151232	799	0.0955369	12	0.0016619	0.0173953	441	0.0318377	48	0.00546156	0.171544
Tet2	179973	11.6227	15259	2.31308	0.199013	204201	21.0223	62134	6.5511	0.311626	119075	9.47361	24622	3.13852	0.33129	102643	12.2731	36722	5.08568	0.414376	159265	11.498	25287	2.87722	0.250236
Tsc1	57862	3.73675	956	0.144918	0.0387817	12001	1.23549	21680	2.28583	1.85014	31836	2.53287	1604	0.204459	0.080722	70101	8.38202	212	0.0293602	0.00350275	46458	3.354	234	0.0266251	0.00793831
Tsc2	63497	4.10067	2379	0.360627	0.0879436	553	0.0569308	32	0.00337392	0.0592635	1537	0.122284	64	0.00815795	0.0667132	1440	0.172182	1	0.000138491	0.000804332	293	0.0211529	0	0	0
	1548456	100	659684	100		971355	100	948452	100		1256912	100	784511	100		836326	100	722067	100		1385151	100	878869	100
