# Supplementary material for: Extrachromosomal circular DNA harboring targeted tumor suppressor gene mutations supports intratumor heterogeneity in mouse liver cancer induced by multiplexed CRISPR/Cas9
Source: Research Square preprint supplement (doi:10.21203/rs.3.rs-1333557/v1), 2022-02-10
Supplement: Supplementary file 4 [file ec4e147072572330489d2fc6.xlsx]

## Sheet: Reads
Target Gene	Type	1-C3	1C3-1	1C3-2	1C3-3	1C3-4	6C7	6C7-1	6C7-2	6C7-3	6C7-4	6C7-5	6C7-6	6C7-7	6C7-8	Reference
Apc	Ins 1 A	40077	10895	8395	2954	1410	0	0	0	0	0	0	0	0	0	CATGGCATAAAGCAGTTACTACATAAGAACTTGTTTCTGTTTAGAATTTAACTTAGATAGTAATTTCCCCGGAGTGAAACTACGCTCAAAAATGTCCCTTCGCTCCTACG|{A}GAAGTCGGGAAGGATCTGTATCCAGCCGTTCAGGAGAATGCAGTCCTGTCCCCATGGGGTCATTCCCAAGAAGAACATTTGTAAATGGAAGCAGAGAGAGTACTGGGTATC
Apc	Del 1|0	20559	20434	16528	9142	9360	8241	29524	9785	8349	16119	14215	16470	24251	17286	CATGGCATAAAGCAGTTACTACATAAGAACTTGTTTCTGTTTAGAATTTAACTTAGATAGTAATTTCCCCGGAGTGAAACTACGCTCAAAAATGTCCCTTCGCTCCTAC-|GAAGTCGGGAAGGATCTGTATCCAGCCGTTCAGGAGAATGCAGTCCTGTCCCCATGGGGTCATTCCCAAGAAGAACATTTGTAAATGGAAGCAGAGAGAGTACTGGGTATC
Apc	Del 0|3	4	5394	4765	2985	3658	0	0	0	0	0	0	0	0	0	CATGGCATAAAGCAGTTACTACATAAGAACTTGTTTCTGTTTAGAATTTAACTTAGATAGTAATTTCCCCGGAGTGAAACTACGCTCAAAAATGTCCCTTCGCTCCTACG|---GTCGGGAAGGATCTGTATCCAGCCGTTCAGGAGAATGCAGTCCTGTCCCCATGGGGTCATTCCCAAGAAGAACATTTGTAAATGGAAGCAGAGAGAGTACTGGGTATC
Apc	Del 0|5	33329	275	318	1627	4762	0	0	0	0	0	0	0	0	0	CATGGCATAAAGCAGTTACTACATAAGAACTTGTTTCTGTTTAGAATTTAACTTAGATAGTAATTTCCCCGGAGTGAAACTACGCTCAAAAATGTCCCTTCGCTCCTACG|-----CGGGAAGGATCTGTATCCAGCCGTTCAGGAGAATGCAGTCCTGTCCCCATGGGGTCATTCCCAAGAAGAACATTTGTAAATGGAAGCAGAGAGAGTACTGGGTATC
Apc	Del 3|3	32813	264	249	1430	4196	0	0	0	0	0	0	0	0	0	CATGGCATAAAGCAGTTACTACATAAGAACTTGTTTCTGTTTAGAATTTAACTTAGATAGTAATTTCCCCGGAGTGAAACTACGCTCAAAAATGTCCCTTCGCTCCT---|---GTCGGGAAGGATCTGTATCCAGCCGTTCAGGAGAATGCAGTCCTGTCCCCATGGGGTCATTCCCAAGAAGAACATTTGTAAATGGAAGCAGAGAGAGTACTGGGTATC
Apc	Del 0|2	0	0	0	0	0	8191	29535	9622	8305	16024	13982	15383	22596	17175	CATGGCATAAAGCAGTTACTACATAAGAACTTGTTTCTGTTTAGAATTTAACTTAGATAGTAATTTCCCCGGAGTGAAACTACGCTCAAAAATGTCCCTTCGCTCCTACG|--AGTCGGGAAGGATCTGTATCCAGCCGTTCAGGAGAATGCAGTCCTGTCCCCATGGGGTCATTCCCAAGAAGAACATTTGTAAATGGAAGCAGAGAGAGTACTGGGTATC
Apc	Del 4|1	0	0	0	0	0	7335	28514	8226	7472	14162	13613	13853	11924	13694	CATGGCATAAAGCAGTTACTACATAAGAACTTGTTTCTGTTTAGAATTTAACTTAGATAGTAATTTCCCCGGAGTGAAACTACGCTCAAAAATGTCCCTTCGCTCC----|-AAGTCGGGAAGGATCTGTATCCAGCCGTTCAGGAGAATGCAGTCCTGTCCCCATGGGGTCATTCCCAAGAAGAACATTTGTAAATGGAAGCAGAGAGAGTACTGGGTATC
Apob	Del 0|1	27692	12273	853	549	2916	20698	29644	21677	20951	41437	47605	39554	49676	48428	TCCGAAGACCCTGTAGAGCAAGCAGCAGGGGCTAGGCCCGTGGCCAGGCCACAGCCAGGAAGCCACCCCACCATCCATCCGCCATGGGCCCACGAAAGCCTGCCCTGC|-GACGCCGTTACTGCTGCTGTTCCTGCTACTGTTCTTGGACACCAGCGTCTGGGCTCGTGAGTTAGGGTGGAAGCCTGGGAGAAAGCCA
Apob	Del 0|12	25525	41	8	449	9692	0	0	0	0	0	0	0	0	0	TCCGAAGACCCTGTAGAGCAAGCAGCAGGGGCTAGGCCCGTGGCCAGGCCACAGCCAGGAAGCCACCCCACCATCCATCCGCCATGGGCCCACGAAAGCCTGCCCTGC|G------------GCTGCTGTTCCTGCTACTGTTCTTGGACACCAGCGTCTGGGCTCGTGAGTTAGGGTGGAAGCCTGGGAGAAAGCCA
Apob	Del 0|2	20837	80	5	451	9606	0	0	0	0	0	0	0	0	0	TCCGAAGACCCTGTAGAGCAAGCAGCAGGGGCTAGGCCCGTGGCCAGGCCACAGCCAGGAAGCCACCCCACCATCCATCCGCCATGGGCCCACGAAAGCCTGCCCTGC|G--CGCCGTTACTGCTGCTGTTCCTGCTACTGTTCTTGGACACCAGCGTCTGGGCTCGTGAGTTAGGGTGGAAGCCTGGGAGAAAGCCA
Apob	Ins 1 G	14044	5576	363	382	667	0	0	0	0	0	0	0	0	0	TCCGAAGACCCTGTAGAGCAAGCAGCAGGGGCTAGGCCCGTGGCCAGGCCACAGCCAGGAAGCCACCCCACCATCCATCCGCCATGGGCCCACGAAAGCCTGCCCTGC|{G}GGACGCCGTTACTGCTGCTGTTCCTGCTACTGTTCTTGGACACCAGCGTCTGGGCTCGTGAGTTAGGGTGGAAGCCTGGGAGAAAGCCA
Apob	Del 19|91	395	4134	441	566	1165	0	0	0	0	0	0	0	0	0	TCCGAAGACCCTGTAGAGCAAGCAGCAGGGGCTAGGCCCGTGGCCAGGCCACAGCCAGGAAGCCACCCCACCATCCATCCGCCATGGGC------------------- | -------------------------------------------------------------------------------------------TGGGAGAAAGCCA
Apob	Del 0|6	0	0	0	0	0	4806	30894	5332	5504	10561	11975	9465	8411	10963	TCCGAAGACCCTGTAGAGCAAGCAGCAGGGGCTAGGCCCGTGGCCAGGCCACAGCCAGGAAGCCACCCCACCATCCATCCGCCATGGGCCCACGAAAGCCTGCCCTGC|------CGTTACTGCTGCTGTTCCTGCTACTGTTCTTGGACACCAGCGTCTGGGCTCGTGAGTTAGGGTGGAAGCCTGGGAGAAAGCCA
Apob	Del 0|9	0	0	0	0	0	9034	32266	10943	10724	22163	13824	18248	16579	22640	TCCGAAGACCCTGTAGAGCAAGCAGCAGGGGCTAGGCCCGTGGCCAGGCCACAGCCAGGAAGCCACCCCACCATCCATCCGCCATGGGCCCACGAAAGCCTGCCCTGC|G---------ACTGCTGCTGTTCCTGCTACTGTTCTTGGACACCAGCGTCTGGGCTCGTGAGTTAGGGTGGAAGCCTGGGAGAAAGCCA
Arid1a	Del 11|16	868	3306	2894	1075	300	0	0	0	0	0	0	0	0	0	TATGCAGAGGAACCCCCAGATGCCCCAGTACACTTCCCCTCAGCCTGGCTCGGCCTTATCCCCACGTCAGCCGTCTGGAGGACAG----------- | ----------------CAGAACTCCATGGGGAGCTACGGCCCCCAGGGCAGTCAGTATGGCCCACAAGGTAAGTGTGCTACCCCTTTAGAAGGAAAGAGAGGTACTGTGTTAACGGCTG
Arid1a	Del 24|25	795	1259	2401	932	237	0	0	0	0	0	0	0	0	0	TATGCAGAGGAACCCCCAGATGCCCCAGTACACTTCCCCTCAGCCTGGCTCGGCCTTATCCCCACGTCAGCC------------------------ | -------------------------ATGGGGAGCTACGGCCCCCAGGGCAGTCAGTATGGCCCACAAGGTAAGTGTGCTACCCCTTTAGAAGGAAAGAGAGGTACTGTGTTAACGGCTG
Arid1a	Del 10|9	1945	3	14	1445	6261	0	0	0	0	0	0	0	0	0	TATGCAGAGGAACCCCCAGATGCCCCAGTACACTTCCCCTCAGCCTGGCTCGGCCTTATCCCCACGTCAGCCGTCTGGAGGACAGA---------- | ---------CTACCAGCAGAACTCCATGGGGAGCTACGGCCCCCAGGGCAGTCAGTATGGCCCACAAGGTAAGTGTGCTACCCCTTTAGAAGGAAAGAGAGGTACTGTGTTAACGGCTG
Arid1a	Del 0|4	3658	5	185	1158	5169	3587	12185	6447	3723	6873	11771	7776	6642	4514	TATGCAGAGGAACCCCCAGATGCCCCAGTACACTTCCCCTCAGCCTGGCTCGGCCTTATCCCCACGTCAGCCGTCTGGAGGACAGATGCACTCGGG|----GGCTCCTACCAGCAGAACTCCATTAGGGGAGCTACGGCCCCCAGGGCAGTCAGTATGGCCCACAAGGTAAGTGTGCTACCCCTTTAGAAGGAAAGAGAGGTACTGTGTTAACGGCTG
Arid1a	Del 1|2	0	0	0	0	0	4436	14690	8238	4852	8850	15306	9567	9464	11203	TATGCAGAGGAACCCCCAGATGCCCCAGTACACTTCCCCTCAGCCTGGCTCGGCCTTATCCCCACGTCAGCCGTCTGGAGGACAGATGCACTCGG-|--TGGGCTCCTACCAGCAGAACTCCATTAGGGGAGCTACGGCCCCCAGGGCAGTCAGTATGGCCCACAAGGTAAGTGTGCTACCCCTTTAGAAGGAAAGAGAGGTACTGTGTTAACGGCTG
Arid1a	Del 0|2	0	0	0	0	0	4211	12898	3836	4516	8363	5961	9027	12690	11320	TATGCAGAGGAACCCCCAGATGCCCCAGTACACTTCCCCTCAGCCTGGCTCGGCCTTATCCCCACGTCAGCCGTCTGGAGGACAGATGCACTCGGG|--TGGGCTCCTACCAGCAGAACTCCATTAGGGGAGCTACGGCCCCCAGGGCAGTCAGTATGGCCCACAAGGTAAGTGTGCTACCCCTTTAGAAGGAAAGAGAGGTACTGTGTTAACGGCTG
Arid1b	WT	10321	4765	9667	10333	8792	0	0	0	0	0	0	0	0	0	CTTGGGCAAGGACCTAGGCGCCCAGTACGCCGCTGCCAGCCCGGCCTGGGCGGCCGCGCAACAAAGGAGTCACCCGGCGATGAGCCCCGGCACCCCCG|GACCGACCATGGGCAGATCCCAGGTAACCCCCGCGCCCGGCCGGGCCTGCTTCCGCCCGGGCCTCGCGCCGCGAGCCCGACTTTCTTTCTTCGCCGGGTACTTTTCCCGGCGGTTG
Arid1b	Del 23|24	2475	116584	173569	142835	194685	33452	93787	19575	14195	4985	89069	76440	98909	115833	CTTGGGCAAGGACCTAGGCGCCCAGTACGCCGCTGCCAGCCCGGCCTGGGCGGCCGCGCAACAAAGGAGTCACCC----------------------- | ------------------------TAACCCCCGCGCCCGGCCGGGCCTGCTTCCGCCCGGGCCTCGCGCCGCGAGCCCGACTTTCTTTCTTCGCCGGGTACTTTTCCCGGCGGTTG
Arid1b	Del 1|0	1594	1654	338	2	0	0	0	0	0	0	0	0	0	0	CTTGGGCAAGGACCTAGGCGCCCAGTACGCCGCTGCCAGCCCGGCCTGGGCGGCCGCGCAACAAAGGAGTCACCCGGCGATGAGCCCCGGCACCCCC-|GACCGACCATGGGCAGATCCCAGGTAACCCCCGCGCCCGGCCGGGCCTGCTTCCGCCCGGGCCTCGCGCCGCGAGCCCGACTTTCTTTCTTCGCCGGGTACTTTTCCCGGCGGTTG
Arid1b	Del 24|23	0	0	0	0	0	1227	84	8	11	45096	60	59	126	75	CTTGGGCAAGGACCTAGGCGCCCAGTACGCCGCTGCCAGCCCGGCCTGGGCGGCCGCGCAACAAAGGAGTCACC------------------------ | -----------------------GTAACCCCCGCGCCCGGCCGGGCCTGCTTCCGCCCGGGCCTCGCGCCGCGAGCCCGACTTTCTTTCTTCGCCGGGTACTTTTCCCGGCGGTTG
Arid2	Del 0|3	6529	36	145	4645	24131	4119	17382	5577	8034	8533	15934	10797	8124	10958	CAGCTTAACATAGGGCTTCCTGTGGTATATAATGTCTTTATTCCTCTCTCTCTCTCTTTTAGGCTAAATGCTCATTTTGAAGTAAATCCAGAC|---TCCGTCTCTCGGGCAGAAATGTATTCAGAGTACCTCTCAACTTGCAGTAAATTAGCTCGCGGTGGCATCCTCACATCAACTGGGTTTTATAAGTGTCTTAGGTAACTCGCACAGCTC
Arid2	Ins 2 AG	4052	6248	8754	3383	1074	0	0	0	0	0	0	0	0	0	CAGCTTAACATAGGGCTTCCTGTGGTATATAATGTCTTTATTCCTCTCTCTCTCTCTTTTAGGCTAAATGCTCATTTTGAAGTAAATCCAGAC|{AG}TGTTCCGTCTCTCGGGCAGAAATGTATTCAGAGTACCTCTCAACTTGCAGTAAATTAGCTCGCGGTGGCATCCTCACATCAACTGGGTTTTATAAGTGTCTTAGGTAACTCGCACAGCTC
Arid2	Del 0|2	3924	6165	8937	3590	1991	0	0	0	0	0	0	0	0	0	CAGCTTAACATAGGGCTTCCTGTGGTATATAATGTCTTTATTCCTCTCTCTCTCTCTTTTAGGCTAAATGCTCATTTTGAAGTAAATCCAGAC|--TTCCGTCTCTCGGGCAGAAATGTATTCAGAGTACCTCTCAACTTGCAGTAAATTAGCTCGCGGTGGCATCCTCACATCAACTGGGTTTTATAAGTGTCTTAGGTAACTCGCACAGCTC
Arid2	Ins 1 T	3765	6362	9043	6637	1122	12714	59603	18137	18196	25407	44828	32958	32606	33024	CAGCTTAACATAGGGCTTCCTGTGGTATATAATGTCTTTATTCCTCTCTCTCTCTCTTTTAGGCTAAATGCTCATTTTGAAGTAAATCCAGAC|{T}TGTTCCGTCTCTCGGGCAGAAATGTATTCAGAGTACCTCTCAACTTGCAGTAAATTAGCTCGCGGTGGCATCCTCACATCAACTGGGTTTTATAAGTGTCTTAGGTAACTCGCACAGCTC
Atm	WT	133388	59415	87660	71436	74501	42588	97720	51295	48277	79958	78005	58555	92651	79695	TCTGTCATTCATTGGTGAAGAAATCAAAGTAGAAAAACATTGAGCGACTGCTCTAAAGTCCTATTATTCCCATTTTCTTAAACATCATGTTTTTCCTTTCTGCAGGTTTTAGAGAAAGTCTCCGAATC|GTTTGGATGTAGAAGTTTAGAAGACTTCATGATTTCTCACCTAGACTACCTGGTTTTGGAATGGCTGAACCTTCAAGATACTG
Atm	Del 8|0	10	41670	61739	51343	55027	0	0	0	0	0	0	0	0	0	TCTGTCATTCATTGGTGAAGAAATCAAAGTAGAAAAACATTGAGCGACTGCTCTAAAGTCCTATTATTCCCATTTTCTTAAACATCATGTTTTTCCTTTCTGCAGGTTTTAGAGAAAGTC--------|GTTTGGATGTAGAAGTTTAGAAGACTTCATGATTTCTCACCTAGACTACCTGGTTTTGGAATGGCTGAACCTTCAAGATACTG
Atm	Del 0|6	18	25363	37549	31552	33927	0	0	0	0	0	0	0	0	0	TCTGTCATTCATTGGTGAAGAAATCAAAGTAGAAAAACATTGAGCGACTGCTCTAAAGTCCTATTATTCCCATTTTCTTAAACATCATGTTTTTCCTTTCTGCAGGTTTTAGAGAAAGTCTCCGAATC|------ATGTAGAAGTTTAGAAGACTTCATGATTTCTCACCTAGACTACCTGGTTTTGGAATGGCTGAACCTTCAAGATACTG
Atm	Del 3|0	42236	506	793	1578	2966	0	0	0	0	0	0	0	0	0	TCTGTCATTCATTGGTGAAGAAATCAAAGTAGAAAAACATTGAGCGACTGCTCTAAAGTCCTATTATTCCCATTTTCTTAAACATCATGTTTTTCCTTTCTGCAGGTTTTAGAGAAAGTCTCCGA---|GTTTGGATGTAGAAGTTTAGAAGACTTCATGATTTCTCACCTAGACTACCTGGTTTTGGAATGGCTGAACCTTCAAGATACTG
Axin1	Del 1|0	52865	55643	49993	31856	32544	24647	55596	36299	32301	54437	85190	71378	97671	60781	GTTCTGAGGCCCGTCATCTGGTCCCTGCCTCAGCCAATAGGCGGCAGGAGCCCGAGCTGCAGCCTAGAGTCACGCTTCTGCCTCCCAGCCACACAGTGGCCAAGAGCAG-|GACCGGCTTCCTAGAGTGGCTGAAAGTGCTCGGACGGACAGCCAAGCCCATCATGGCGGACAGCGGGACAGTGGGTCGTGATCAGGCACTTGGAGCCAGGCAGGTGAGGTAA
Axin1	Del 12|0	11750	11	32	7082	25518	0	0	0	0	0	0	0	0	0	GTTCTGAGGCCCGTCATCTGGTCCCTGCCTCAGCCAATAGGCGGCAGGAGCCCGAGCTGCAGCCTAGAGTCACGCTTCTGCCTCCCAGCCACACAGTG------------|GACCGGCTTCCTAGAGTGGCTGAAAGTGCTCGGACGGACAGCCAAGCCCATCATGGCGGACAGCGGGACAGTGGGTCGTGATCAGGCACTTGGAGCCAGGCAGGTGAGGTAA
Axin1	Ins 1 G	0	0	0	0	0	11124	24800	16716	14722	24017	39589	39361	27275	28748	GTTCTGAGGCCCGTCATCTGGTCCCTGCCTCAGCCAATAGGCGGCAGGAGCCCGAGCTGCAGCCTAGAGTCACGCTTCTGCCTCCCAGCCACACAGTGGCCAAGAGCAGG{G}|GACCGGCTTCCTAGAGTGGCTGAAAGTGCTCGGACGGACAGCCAAGCCCATCATGGCGGACAGCGGGACAGTGGGTCGTGATCAGGCACTTGGAGCCAGGCAGGTGAGGTAA
Cdkn2a	WT	4067	615	612	443	537	0	0	0	0	0	0	0	0	0	CAGGTGATGATGATGGGCAACGTTCACGTAGCAGCTCTTCTGCTCAACTACGGTGCAGATTCGAACTGCGAGGACCCCACTACCTTCTCCCGCCC|GGTGCACGACGCAGCGCGGGAAGGCTTCCTGGACACGCTGGTGGTGCTGCACGGGTCAGGGGCTCGGCTGGATGTGCGCGATGCCTGGGGTCGCCTGCCGCTCGACTTGGCCCAAGA
Cdkn2a	Del 0|1	13120	34107	39119	20451	16246	6412	34734	10834	7709	14565	18539	13896	15504	926	CAGGTGATGATGATGGGCAACGTTCACGTAGCAGCTCTTCTGCTCAACTACGGTGCAGATTCGAACTGCGAGGACCCCACTACCTTCTCCCGCCC|-GTGCACGACGCAGCGCGGGAAGGCTTCCTGGACACGCTGGTGGTGCTGCACGGGTCAGGGGCTCGGCTGGATGTGCGCGATGCCTGGGGTCGCCTGCCGCTCGACTTGGCCCAAGA
Cdkn2a	Del 0|5	7305	67	98	4457	16937	0	0	0	0	0	0	0	0	0	CAGGTGATGATGATGGGCAACGTTCACGTAGCAGCTCTTCTGCTCAACTACGGTGCAGATTCGAACTGCGAGGACCCCACTACCTTCTCCCGCCC|-----ACGACGCAGCGCGGGAAGGCTTCCTGGACACGCTGGTGGTGCTGCACGGGTCAGGGGCTCGGCTGGATGTGCGCGATGCCTGGGGTCGCCTGCCGCTCGACTTGGCCCAAGA
Cdkn2a	Del 0|7	6835	116	143	4311	14895	10278	35185	19262	14104	24252	36047	20997	25905	24717	CAGGTGATGATGATGGGCAACGTTCACGTAGCAGCTCTTCTGCTCAACTACGGTGCAGATTCGAACTGCGAGGACCCCACTACCTTCTCCCGCCC|-------GACGCAGCGCGGGAAGGCTTCCTGGACACGCTGGTGGTGCTGCACGGGTCAGGGGCTCGGCTGGATGTGCGCGATGCCTGGGGTCGCCTGCCGCTCGACTTGGCCCAAGA
Cdkn2a	Ins 1 G	5185	7469	9460	3461	881	0	0	0	0	0	0	0	0	0	CAGGTGATGATGATGGGCAACGTTCACGTAGCAGCTCTTCTGCTCAACTACGGTGCAGATTCGAACTGCGAGGACCCCACTACCTTCTCCCGCCC|{G}GGTGCACGACGCAGCGCGGGAAGGCTTCCTGGACACGCTGGTGGTGCTGCACGGGTCAGGGGCTCGGCTGGATGTGCGCGATGCCTGGGGTCGCCTGCCGCTCGACTTGGCCCAAGA
Cdkn2a	Del 1|1	68	7420	8099	6079	7513	0	0	0	0	0	0	0	0	0	CAGGTGATGATGATGGGCAACGTTCACGTAGCAGCTCTTCTGCTCAACTACGGTGCAGATTCGAACTGCGAGGACCCCACTACCTTCTCCCGCC-|-GTGCACGACGCAGCGCGGGAAGGCTTCCTGGACACGCTGGTGGTGCTGCACGGGTCAGGGGCTCGGCTGGATGTGCGCGATGCCTGGGGTCGCCTGCCGCTCGACTTGGCCCAAGA
Cdkn2a	Del 1|0	39	3737	3985	3024	3609	0	0	0	0	0	0	0	0	0	CAGGTGATGATGATGGGCAACGTTCACGTAGCAGCTCTTCTGCTCAACTACGGTGCAGATTCGAACTGCGAGGACCCCACTACCTTCTCCCGCC-|GGTGCACGACGCAGCGCGGGAAGGCTTCCTGGACACGCTGGTGGTGCTGCACGGGTCAGGGGCTCGGCTGGATGTGCGCGATGCCTGGGGTCGCCTGCCGCTCGACTTGGCCCAAGA
Cdkn2a	Del 0|3	0	0	0	0	0	10205	30987	10310	13959	24662	15268	19876	33491	25829	CAGGTGATGATGATGGGCAACGTTCACGTAGCAGCTCTTCTGCTCAACTACGGTGCAGATTCGAACTGCGAGGACCCCACTACCTTCTCCCGCCC|---GCACGACGCAGCGCGGGAAGGCTTCCTGGACACGCTGGTGGTGCTGCACGGGTCAGGGGCTCGGCTGGATGTGCGCGATGCCTGGGGTCGCCTGCCGCTCGACTTGGCCCAAGA
Cdkn2a	Ins 26bp	0	0	0	0	0	8458	29367	16344	12233	20739	29912	17774	22749	11361	CAGGTGATGATGATGGGCAACGTTCACGTAGCAGCTCTTCTGCTCAACTACGGTGCAGATTCGAACTGCGAGGACCCCACTACCTTCTCCCGCCC| {TGGCAATCCTGCTGATTGGCCCGATT}GGTGCACGACGCAGCGCGGGAAGGCTTCCTGGACACGCTGGTGGTGCTGCACGGGTCAGGGGCTCGGCTGGATGTGCGCGATGCCTGGGGTCGCCTGCCGCTCGACTTGGCCCAAGA
Chd1	Ins 1 T	4096	1280	4269	2276	1650	7482	30851	15089	13568	24923	21011	20047	25864	20132	AGCGACTCTGATTCTGGCTCTGACTCAGGAAGTCAATCAGAGTCTGAATCAGACACATCCCGAGAGAACAAGGTTCAAGCAAAACCACCAAAAGT{T}|CGACGGAGCCGAGGTAAGTTAGTGCAATTGAACTGGCTTAAGACAGAAGTTAAATCTTATAACTGACTGGACAGTGTCATGGCCTGGGCATATAGCGCAGCAGTACAGCAC
Chd1	Del 0|2	1346	355	993	5	216	0	0	0	0	0	0	0	0	0	AGCGACTCTGATTCTGGCTCTGACTCAGGAAGTCAATCAGAGTCTGAATCAGACACATCCCGAGAGAACAAGGTTCAAGCAAAACCACCAAAAGT|--ACGGAGCCGAGGTAAGTTAGTGCAATTGAACTGGCTTAAGACAGAAGTTAAATCTTATAACTGACTGGACAGTGTCATGGCCTGGGCATATAGCGCAGCAGTACAGCAC
Chd1	Del 29|13	1302	4	4	783	3725	0	0	0	0	0	0	0	0	0	AGCGACTCTGATTCTGGCTCTGACTCAGGAAGTCAATCAGAGTCTGAATCAGACACATCCCGAGAG----------------------------- | -------------GTAAGTTAGTGCAATTGAACTGGCTTAAGACAGAAGTTAAATCTTATAACTGACTGGACAGTGTCATGGCCTGGGCATATAGCGCAGCAGTACAGCAC
Chd1	Del 18|23	1141	3	8	803	3780	0	0	0	0	0	0	0	0	0	AGCGACTCTGATTCTGGCTCTGACTCAGGAAGTCAATCAGAGTCTGAATCAGACACATCCCGAGAGAACAAGGTTCA------------------ | -----------------------GCAATTGAACTGGCTTAAGACAGAAGTTAAATCTTATAACTGACTGGACAGTGTCATGGCCTGGGCATATAGCGCAGCAGTACAGCAC
Chd1	Del 0|4	1	157	353	241	665	0	0	0	0	0	0	0	0	0	AGCGACTCTGATTCTGGCTCTGACTCAGGAAGTCAATCAGAGTCTGAATCAGACACATCCCGAGAGAACAAGGTTCAAGCAAAACCACCAAAAGT|----GGAGCCGAGGTAAGTTAGTGCAATTGAACTGGCTTAAGACAGAAGTTAAATCTTATAACTGACTGGACAGTGTCATGGCCTGGGCATATAGCGCAGCAGTACAGCAC
Col1a1	Ins 1 T	4628	940	972	573	184	0	0	0	0	0	0	0	0	0	AGTCCAAGACCTTCTCCCAGCATGAAGAGGATGCTAAACCCGTGGTAATAAGGCCAAGGCTGTGGCCCTGATGCGTCTGTGACTTCTCTCCACTTAGGGTCCTTCCGGTGA{T}|ACGTGGTGCTCCCGGACCTGCTGGTCCCAAAGGTTCTCCTGGTGAAGCTGGTCGCCCCGGTGAAGCTGGTCTCCCTGGTGCCAAGGTGAGAAGATCCTCTGTCCTGTATGG
Col1a1	Del 6|2	3892	4	11	294	1075	0	0	0	0	0	0	0	0	0	AGTCCAAGACCTTCTCCCAGCATGAAGAGGATGCTAAACCCGTGGTAATAAGGCCAAGGCTGTGGCCCTGATGCGTCTGTGACTTCTCTCCACTTAGGGTCCTTC------ | --GTGGTGCTCCCGGACCTGCTGGTCCCAAAGGTTCTCCTGGTGAAGCTGGTCGCCCCGGTGAAGCTGGTCTCCCTGGTGCCAAGGTGAGAAGATCCTCTGTCCTGTATGG
Col1a1	Del 9|4	3569	6	12	332	1238	0	0	0	0	0	0	0	0	0	AGTCCAAGACCTTCTCCCAGCATGAAGAGGATGCTAAACCCGTGGTAATAAGGCCAAGGCTGTGGCCCTGATGCGTCTGTGACTTCTCTCCACTTAGGGTCC--------- | ----GGTGCTCCCGGACCTGCTGGTCCCAAAGGTTCTCCTGGTGAAGCTGGTCGCCCCGGTGAAGCTGGTCTCCCTGGTGCCAAGGTGAGAAGATCCTCTGTCCTGTATGG
Col1a1	Del 1|0	87	3971	4421	2766	3742	13064	36329	25305	16415	29015	25017	22576	27553	26444	AGTCCAAGACCTTCTCCCAGCATGAAGAGGATGCTAAACCCGTGGTAATAAGGCCAAGGCTGTGGCCCTGATGCGTCTGTGACTTCTCTCCACTTAGGGTCCTTCCGGTG-|ACGTGGTGCTCCCGGACCTGCTGGTCCCAAAGGTTCTCCTGGTGAAGCTGGTCGCCCCGGTGAAGCTGGTCTCCCTGGTGCCAAGGTGAGAAGATCCTCTGTCCTGTATGG
Col1a1	Del 4|0	5	1940	2169	1383	1859	0	0	0	0	0	0	0	0	0	AGTCCAAGACCTTCTCCCAGCATGAAGAGGATGCTAAACCCGTGGTAATAAGGCCAAGGCTGTGGCCCTGATGCGTCTGTGACTTCTCTCCACTTAGGGTCCTTCCG----|ACGTGGTGCTCCCGGACCTGCTGGTCCCAAAGGTTCTCCTGGTGAAGCTGGTCGCCCCGGTGAAGCTGGTCTCCCTGGTGCCAAGGTGAGAAGATCCTCTGTCCTGTATGG
Col1a1	Del 0|4	1	1000	1103	699	972	0	0	0	0	0	0	0	0	0	AGTCCAAGACCTTCTCCCAGCATGAAGAGGATGCTAAACCCGTGGTAATAAGGCCAAGGCTGTGGCCCTGATGCGTCTGTGACTTCTCTCCACTTAGGGTCCTTCCGGTGA|----GGTGCTCCCGGACCTGCTGGTCCCAAAGGTTCTCCTGGTGAAGCTGGTCGCCCCGGTGAAGCTGGTCTCCCTGGTGCCAAGGTGAGAAGATCCTCTGTCCTGTATGG
Col1a1	Del 0|5	0	835	925	594	848	0	0	0	0	0	0	0	0	0	AGTCCAAGACCTTCTCCCAGCATGAAGAGGATGCTAAACCCGTGGTAATAAGGCCAAGGCTGTGGCCCTGATGCGTCTGTGACTTCTCTCCACTTAGGGTCCTTCCGGTGA|-----GTGCTCCCGGACCTGCTGGTCCCAAAGGTTCTCCTGGTGAAGCTGGTCGCCCCGGTGAAGCTGGTCTCCCTGGTGCCAAGGTGAGAAGATCCTCTGTCCTGTATGG
Col1a1	Del 0|3	0	778	880	594	742	0	0	0	0	0	0	0	0	0	AGTCCAAGACCTTCTCCCAGCATGAAGAGGATGCTAAACCCGTGGTAATAAGGCCAAGGCTGTGGCCCTGATGCGTCTGTGACTTCTCTCCACTTAGGGTCCTTCCGGTGA|---TGGTGCTCCCGGACCTGCTGGTCCCAAAGGTTCTCCTGGTGAAGCTGGTCGCCCCGGTGAAGCTGGTCTCCCTGGTGCCAAGGTGAGAAGATCCTCTGTCCTGTATGG
Col1a1	Del 2|0	0	0	0	0	0	3330	17138	4	3929	7352	6644	5470	5431	6454	AGTCCAAGACCTTCTCCCAGCATGAAGAGGATGCTAAACCCGTGGTAATAAGGCCAAGGCTGTGGCCCTGATGCGTCTGTGACTTCTCTCCACTTAGGGTCCTTCCGGT--|ACGTGGTGCTCCCGGACCTGCTGGTCCCAAAGGTTCTCCTGGTGAAGCTGGTCGCCCCGGTGAAGCTGGTCTCCCTGGTGCCAAGGTGAGAAGATCCTCTGTCCTGTATGG
Dlc1	WT	1781	6959	5327	3538	4875	1328	7513	3	1191	3016	3584	3325	3777	3687	ACGAAAGCATGCTGACAGACCTCAGCGAGCACCAGGAGGTGGCCTCTGTCCGAAGCCTCAGCAGCACCAGCAGCAGCGTCCCCACCCACGCAGCCCACAGTGGAGATGCCACTACGCCCCGAAC|CAATTCCGTCATCAGCGTCTGCTCCTCCGGACACTTTGTAGGCAATGATGACTCTTTTTCCAGCCTGCCGTCTCCCAAGGAACTGTCCAGCTTCAGT
Dlc1	Del 1|0	288	147	128	88	81	7896	22936	14482	7224	18228	21397	19031	22947	20942	ACGAAAGCATGCTGACAGACCTCAGCGAGCACCAGGAGGTGGCCTCTGTCCGAAGCCTCAGCAGCACCAGCAGCAGCGTCCCCACCCACGCAGCCCACAGTGGAGATGCCACTACGCCCCGAA-|CAATTCCGTCATCAGCGTCTGCTCCTCCGGACACTTTGTAGGCAATGATGACTCTTTTTCCAGCCTGCCGTCTCCCAAGGAACTGTCCAGCTTCAGT
Dlc1	Del 0|16	239	20	17	23	76	0	0	0	0	0	0	0	0	0	ACGAAAGCATGCTGACAGACCTCAGCGAGCACCAGGAGGTGGCCTCTGTCCGAAGCCTCAGCAGCACCAGCAGCAGCGTCCCCACCCACGCAGCCCACAGTGGAGATGCCACTACGCCCCGAAC|----------------GTCTGCTCCTCCGGACACTTTGTAGGCAATGATGACTCTTTTTCCAGCCTGCCGTCTCCCAAGGAACTGTCCAGCTTCAGT
Dlc1	Del 4|34	2	2223	1733	1199	1542	0	0	0	0	0	0	0	0	0	ACGAAAGCATGCTGACAGACCTCAGCGAGCACCAGGAGGTGGCCTCTGTCCGAAGCCTCAGCAGCACCAGCAGCAGCGTCCCCACCCACGCAGCCCACAGTGGAGATGCCACTACGCCCC---- | ----------------------------------TTTGTAGGCAATGATGACTCTTTTTCCAGCCTGCCGTCTCCCAAGGAACTGTCCAGCTTCAGT
Dlc1	Del 0|2	0	0	0	0	0	0	0	0	0	0	0	0	0	0	ACGAAAGCATGCTGACAGACCTCAGCGAGCACCAGGAGGTGGCCTCTGTCCGAAGCCTCAGCAGCACCAGCAGCAGCGTCCCCACCCACGCAGCCCACAGTGGAGATGCCACTACGCCCCGAAC|--ATTCCGTCATCAGCGTCTGCTCCTCCGGACACTTTGTAGGCAATGATGACTCTTTTTCCAGCCTGCCGTCTCCCAAGGAACTGTCCAGCTTCAGT
Fbxw7	WT	38296	15751	12488	8396	8629	0	0	0	0	0	0	0	0	0	GTGTGAGTATGCCTTCCCTATTTCCTTTTCCATAGTTGGCACTCTATGTGCTTTCATTCCTGGAACCCAAAGACCTGCTGCAAGCGGCTCAGACTTGTCGA|TACTGGAGAATTTTGGCTGAGGATAACCTTCTCTGGAGAGAGAAATGTAAAGAAGAGGGTAAGTTCAGAATCACACACAGATGTGTTTCTACTCTGGAAACAAGTTAACAGAATAACTTGGCTGTGAGTGAGAGT
Fbxw7	Del 12|11	6813	35	74	1451	4671	0	0	0	0	0	0	0	0	0	GTGTGAGTATGCCTTCCCTATTTCCTTTTCCATAGTTGGCACTCTATGTGCTTTCATTCCTGGAACCCAAAGACCTGCTGCAAGCGGCT------------|-----------TTTGGCTGAGGATAACCTTCTCTGGAGAGAGAAATGTAAAGAAGAGGGTAAGTTCAGAATCACACACAGATGTGTTTCTACTCTGGAAACAAGTTAACAGAATAACTTGGCTGTGAGTGAGAGT
Fbxw7	Del 1|0	24	7374	10187	6573	7507	0	0	0	0	0	0	0	0	0	GTGTGAGTATGCCTTCCCTATTTCCTTTTCCATAGTTGGCACTCTATGTGCTTTCATTCCTGGAACCCAAAGACCTGCTGCAAGCGGCTCAGACTTGTCG-|TACTGGAGAATTTTGGCTGAGGATAACCTTCTCTGGAGAGAGAAATGTAAAGAAGAGGGTAAGTTCAGAATCACACACAGATGTGTTTCTACTCTGGAAACAAGTTAACAGAATAACTTGGCTGTGAGTGAGAGT
Fbxw7	Del 3|0	11	2922	4254	2690	3148	39783	85988	31395	29606	48451	63744	57301	65109	55778	GTGTGAGTATGCCTTCCCTATTTCCTTTTCCATAGTTGGCACTCTATGTGCTTTCATTCCTGGAACCCAAAGACCTGCTGCAAGCGGCTCAGACTTGT---|TACTGGAGAATTTTGGCTGAGGATAACCTTCTCTGGAGAGAGAAATGTAAAGAAGAGGGTAAGTTCAGAATCACACACAGATGTGTTTCTACTCTGGAAACAAGTTAACAGAATAACTTGGCTGTGAGTGAGAGT
Fbxw7	Del 8|9	1	1064	1563	1048	1200	0	0	0	0	0	0	0	0	0	GTGTGAGTATGCCTTCCCTATTTCCTTTTCCATAGTTGGCACTCTATGTGCTTTCATTCCTGGAACCCAAAGACCTGCTGCAAGCGGCTCAGA-------- | ---------ATTTTGGCTGAGGATAACCTTCTCTGGAGAGAGAAATGTAAAGAAGAGGGTAAGTTCAGAATCACACACAGATGTGTTTCTACTCTGGAAACAAGTTAACAGAATAACTTGGCTGTGAGTGAGAGT
Fbxw7	Del 0|5	0	0	0	0	0	39394	86122	31061	30853	47872	63940	58824	63203	56961	GTGTGAGTATGCCTTCCCTATTTCCTTTTCCATAGTTGGCACTCTATGTGCTTTCATTCCTGGAACCCAAAGACCTGCTGCAAGCGGCTCAGACTTGTCGA|-----GAGAATTTTGGCTGAGGATAACCTTCTCTGGAGAGAGAAATGTAAAGAAGAGGGTAAGTTCAGAATCACACACAGATGTGTTTCTACTCTGGAAACAAGTTAACAGAATAACTTGGCTGTGAGTGAGAGT
Hic1	WT	3414	1122	283	192	183	232	415	385	227	509	912	591	883	787	CTACGCTCCTTACGGGCGGCCCGGCCGGGGCTTGAGGGCTGCCACGCCCGTCATCCAGGCTTGCTACTCGTCCCCGGCCGGGCCACCGCCGCCGCCTGCCGCCGAGCCGCCGTCG|GGCCCCGATGCAGCCGTCAACACCCACTGCGCTGAGCTATATGCTTCAGGCCCGGGCCCAGCAGCCTCACTCTGCGCCCCGGAGCGTCGCTGCTCCCCGCTTTG
Hic1	Del 1|0	2632	371	394	393	945	4198	7191	11353	5650	16123	6543	9683	11898	5572	CTACGCTCCTTACGGGCGGCCCGGCCGGGGCTTGAGGGCTGCCACGCCCGTCATCCAGGCTTGCTACTCGTCCCCGGCCGGGCCACCGCCGCCGCCTGCCGCCGAGCCGCCGTC-|GGCCCCGATGCAGCCGTCAACACCCACTGCGCTGAGCTATATGCTTCAGGCCCGGGCCCAGCAGCCTCACTCTGCGCCCCGGAGCGTCGCTGCTCCCCGCTTTG
Hic1	Del 0|3	0	81	0	17	13	0	0	0	0	0	0	0	0	0	CTACGCTCCTTACGGGCGGCCCGGCCGGGGCTTGAGGGCTGCCACGCCCGTCATCCAGGCTTGCTACTCGTCCCCGGCCGGGCCACCGCCGCCGCCTGCCGCCGAGCCGCCGTCG|---CCCGATGCAGCCGTCAACACCCACTGCGCTGAGCTATATGCTTCAGGCCCGGGCCCAGCAGCCTCACTCTGCGCCCCGGAGCGTCGCTGCTCCCCGCTTTG
Hic1	Ins 1 G	0	0	0	0	0	1198	1307	4017	1197	5013	1722	2760	3699	2089	CTACGCTCCTTACGGGCGGCCCGGCCGGGGCTTGAGGGCTGCCACGCCCGTCATCCAGGCTTGCTACTCGTCCCCGGCCGGGCCACCGCCGCCGCCTGCCGCCGAGCCGCCGTCG|{G}GGCCCCGATGCAGCCGTCAACACCCACTGCGCTGAGCTATATGCTTCAGGCCCGGGCCCAGCAGCCTCACTCTGCGCCCCGGAGCGTCGCTGCTCCCCGCTTTG
Hnf1a	WT	23268	24035	23751	16724	31437	41778	89302	40405	41880	82977	79837	77774	62531	83335	GCCCTACCTGATGGTTGGAGAGGGTCCCCTGGACAAGGGGGAGTCCTGCGGTGGGAGTCGAGGGGACCTGACCGAGTTGCCTAATGGCCTTGG|AGAAACGCGTGGCTCTGAAGATGACACGGATGACGATGGGGAAGACTTCGCGCCACCCATTCTGAAAGAGCTGGAGAACCTCAGCCCAGAGGAGGCAGCCCACCAGAAAGCCGTGGTGGAGTCA
Keap1	WT	1660	46928	35255	12806	4669	3220	91	4573	1694	2406	3109	4418	3934	4463	CTTCTACGTGCAGGCACTGCTGCGGGCCGTGCGCTGCCATGCGCTCACGCCGCGCTTCCTGCAGACGCAGCTGCAGAAGTGTGAGATCCTGCAGGCCGACG|CGCGCTGCAAGGACTACCTGGTGCAGATATTCCAGGAGCTCACGCTGCACAAGCCCACGCAGGCAGTGCCCTGCCGCGCGCCCAAAGTGGGCCGCCTCATCTACACAGCGGGCGGTTACTTCCGACAGTCGCT
Keap1	Del 2|1	600	36	16	5440	28813	0	0	0	0	0	0	0	0	0	CTTCTACGTGCAGGCACTGCTGCGGGCCGTGCGCTGCCATGCGCTCACGCCGCGCTTCCTGCAGACGCAGCTGCAGAAGTGTGAGATCCTGCAGGCCGA--|-GCGCTGCAAGGACTACCTGGTGCAGATATTCCAGGAGCTCACGCTGCACAAGCCCACGCAGGCAGTGCCCTGCCGCGCGCCCAAAGTGGGCCGCCTCATCTACACAGCGGGCGGTTACTTCCGACAGTCGCT
Keap1	Del 8|9	0	0	0	0	0	3492	17104	4963	1887	5199	3382	4719	6777	4783	CTTCTACGTGCAGGCACTGCTGCGGGCCGTGCGCTGCCATGCGCTCACGCCGCGCTTCCTGCAGACGCAGCTGCAGAAGTGTGAGATCCTGCA--------|---------AGGACTACCTGGTGCAGATATTCCAGGAGCTCACGCTGCACAAGCCCACGCAGGCAGTGCCCTGCCGCGCGCCCAAAGTGGGCCGCCTCATCTACACAGCGGGCGGTTACTTCCGACAGTCGCT
Kmt2a	WT	11319	393	507	482	362	0	0	0	0	0	0	0	0	0	AGTTGCTGGCTCAGAAGATGCCGAGCCTCTTGCTCCTCCCATCAAACCAATTAAGCCTGTCACCAGAAACAAGGCACCTCAGGAGCCTCCGGTGAAGAAAGGGCGGCGATCA|AGGCGGTGCGGACAATGTCCTGGCTGCCAGGTGCCTGAGGACTGTGGCATTTGCACTAATTGCCTGGACAAGCCCAAGTTTGGTGGCCGCAATATA
Kmt2a	Del 6|0	43853	66990	93967	82171	123336	0	0	0	0	0	0	0	0	0	AGTTGCTGGCTCAGAAGATGCCGAGCCTCTTGCTCCTCCCATCAAACCAATTAAGCCTGTCACCAGAAACAAGGCACCTCAGGAGCCTCCGGTGAAGAAAGGGCGG------|AGGCGGTGCGGACAATGTCCTGGCTGCCAGGTGCCTGAGGACTGTGGCATTTGCACTAATTGCCTGGACAAGCCCAAGTTTGGTGGCCGCAATATA
Kmt2a	Del 20|2	27953	97	533	45178	114946	0	0	0	0	0	0	0	0	0	AGTTGCTGGCTCAGAAGATGCCGAGCCTCTTGCTCCTCCCATCAAACCAATTAAGCCTGTCACCAGAAACAAGGCACCTCAGGAGCCTCCGG--------------------|--GCGGTGCGGACAATGTCCTGGCTGCCAGGTGCCTGAGGACTGTGGCATTTGCACTAATTGCCTGGACAAGCCCAAGTTTGGTGGCCGCAATATA
Kmt2a	Ins 1 A	23578	59934	83708	36957	7361	4877	27031	5933	5030	10986	11838	3579	3736	8556	AGTTGCTGGCTCAGAAGATGCCGAGCCTCTTGCTCCTCCCATCAAACCAATTAAGCCTGTCACCAGAAACAAGGCACCTCAGGAGCCTCCGGTGAAGAAAGGGCGGCGATCA{A}|AGGCGGTGCGGACAATGTCCTGGCTGCCAGGTGCCTGAGGACTGTGGCATTTGCACTAATTGCCTGGACAAGCCCAAGTTTGGTGGCCGCAATATA
Kmt2a	Del 7|0	16673	64829	90356	33173	5487	0	0	0	0	0	0	0	0	0	AGTTGCTGGCTCAGAAGATGCCGAGCCTCTTGCTCCTCCCATCAAACCAATTAAGCCTGTCACCAGAAACAAGGCACCTCAGGAGCCTCCGGTGAAGAAAGGGC-------A|AGGCGGTGCGGACAATGTCCTGGCTGCCAGGTGCCTGAGGACTGTGGCATTTGCACTAATTGCCTGGACAAGCCCAAGTTTGGTGGCCGCAATATA
Kmt2a	Del 4|0	10719	904	1183	1198	889	0	0	0	0	0	0	0	0	0	AGTTGCTGGCTCAGAAGATGCCGAGCCTCTTGCTCCTCCCATCAAACCAATTAAGCCTGTCACCAGAAACAAGGCACCTCAGGAGCCTCCGGTGAAGAAAGGGCGGCG----|AGGCGGTGCGGACAATGTCCTGGCTGCCAGGTGCCTGAGGACTGTGGCATTTGCACTAATTGCCTGGACAAGCCCAAGTTTGGTGGCCGCAATATA
Kmt2a	Del 3|0	0	0	0	0	0	5487	36705	6700	6006	12468	14368	13240	4241	9588	AGTTGCTGGCTCAGAAGATGCCGAGCCTCTTGCTCCTCCCATCAAACCAATTAAGCCTGTCACCAGAAACAAGGCACCTCAGGAGCCTCCGGTGAAGAAAGGGCGGCGA---|AGGCGGTGCGGACAATGTCCTGGCTGCCAGGTGCCTGAGGACTGTGGCATTTGCACTAATTGCCTGGACAAGCCCAAGTTTGGTGGCCGCAATATA
Kmt2a	Del 1|0	0	0	0	0	0	10533	129	14028	12290	13116	27243	25342	25935	18957	AGTTGCTGGCTCAGAAGATGCCGAGCCTCTTGCTCCTCCCATCAAACCAATTAAGCCTGTCACCAGAAACAAGGCACCTCAGGAGCCTCCGGTGAAGAAAGGGCGGCGAT-A|AGGCGGTGCGGACAATGTCCTGGCTGCCAGGTGCCTGAGGACTGTGGCATTTGCACTAATTGCCTGGACAAGCCCAAGTTTGGTGGCCGCAATATA
Kmt2a	Del 3|0 Ins 2GA	0	0	0	0	0	11022	31381	14479	12527	25912	26948	25259	43320	19945	AGTTGCTGGCTCAGAAGATGCCGAGCCTCTTGCTCCTCCCATCAAACCAATTAAGCCTGTCACCAGAAACAAGGCACCTCAGGAGCCTCCGGTGAAGAAAGGGCGGCGA---{GA}|AGGCGGTGCGGACAATGTCCTGGCTGCCAGGTGCCTGAGGACTGTGGCATTTGCACTAATTGCCTGGACAAGCCCAAGTTTGGTGGCCGCAATATA
Kmt2c	WT	47189	53457	57954	29779	13058	20416	58215	19372	5357	60505	28586	51336	28227	45140	CTCATGCCAAACCAGGATCCTTTTTTGCAAGCAGCACAAAACCGAGTACCAGGTTTACCTGGCCCTTTGATAAGGCCACCTGATACATGCTCCCAGACTCCCAGGCCACCTGGGCCTGGC|CGTATAGACACATTCACTCATGCTTCCTCATCTGCTGTTCGTGATCCATATGATCAGCCTCCAGTGACTCCCAGGCCTCATTCTGAGTCTTTCG
Kmt2c	Del 43|35	16753	2552	3995	8387	22270	0	0	0	0	0	0	0	0	0	CTCATGCCAAACCAGGATCCTTTTTTGCAAGCAGCACAAAACCGAGTACCAGGTTTACCTGGCCCTTTGATAAGGCC------------------------------------------- | -------------------------CCTCATCTGCTGTTCGTGATCCATATGATCAGCCTCCAGTGACTCCCAGGCCTCATTCTGAGTCTTTCG
Kmt2c	Del 0|5	15539	1210	1367	6569	26963	0	0	0	0	0	0	0	0	0	CTCATGCCAAACCAGGATCCTTTTTTGCAAGCAGCACAAAACCGAGTACCAGGTTTACCTGGCCCTTTGATAAGGCCACCTGATACATGCTCCCAGACTCCCAGGCCACCTGGGCCTGGC|-----AGACACATTCACTCATGCTTCCTCATCTGCTGTTCGTGATCCATATGATCAGCCTCCAGTGACTCCCAGGCCTCATTCTGAGTCTTTCG
Kmt2c	Del 1|0	700	11619	13196	10018	14236	0	0	0	0	0	0	0	0	0	CTCATGCCAAACCAGGATCCTTTTTTGCAAGCAGCACAAAACCGAGTACCAGGTTTACCTGGCCCTTTGATAAGGCCACCTGATACATGCTCCCAGACTCCCAGGCCACCTGGGCCTGG-|CGTATAGACACATTCACTCATGCTTCCTCATCTGCTGTTCGTGATCCATATGATCAGCCTCCAGTGACTCCCAGGCCTCATTCTGAGTCTTTCG
Kmt2c	Del 0|2	4	9076	10113	8077	12272	0	0	0	0	0	0	0	0	0	CTCATGCCAAACCAGGATCCTTTTTTGCAAGCAGCACAAAACCGAGTACCAGGTTTACCTGGCCCTTTGATAAGGCCACCTGATACATGCTCCCAGACTCCCAGGCCACCTGGGCCTGGC|C--ATAGACACATTCACTCATGCTTCCTCATCTGCTGTTCGTGATCCATATGATCAGCCTCCAGTGACTCCCAGGCCTCATTCTGAGTCTTTCG
Kmt2c	Del 0|5	14	7186	8040	6951	11512	0	0	0	0	0	0	0	0	0	CTCATGCCAAACCAGGATCCTTTTTTGCAAGCAGCACAAAACCGAGTACCAGGTTTACCTGGCCCTTTGATAAGGCCACCTGATACATGCTCCCAGACTCCCAGGCCACCTGGGCCTGGC|C-----GACACATTCACTCATGCTTCCTCATCTGCTGTTCGTGATCCATATGATCAGCCTCCAGTGACTCCCAGGCCTCATTCTGAGTCTTTCG
Kmt2c	Del 0|3	8	4071	4557	3795	5849	0	0	0	0	0	0	0	0	0	CTCATGCCAAACCAGGATCCTTTTTTGCAAGCAGCACAAAACCGAGTACCAGGTTTACCTGGCCCTTTGATAAGGCCACCTGATACATGCTCCCAGACTCCCAGGCCACCTGGGCCTGGC|---ATAGACACATTCACTCATGCTTCCTCATCTGCTGTTCGTGATCCATATGATCAGCCTCCAGTGACTCCCAGGCCTCATTCTGAGTCTTTCG
Kmt2c	Del 0|1	0	0	0	0	0	25804	658	23962	33956	22315	41489	25392	48463	50416	CTCATGCCAAACCAGGATCCTTTTTTGCAAGCAGCACAAAACCGAGTACCAGGTTTACCTGGCCCTTTGATAAGGCCACCTGATACATGCTCCCAGACTCCCAGGCCACCTGGGCCTGGC|C-TATAGACACATTCACTCATGCTTCCTCATCTGCTGTTCGTGATCCATATGATCAGCCTCCAGTGACTCCCAGGCCTCATTCTGAGTCTTTCG
Kmt2c	Del 0|2	0	0	0	0	0	25000	79489	22903	25760	20571	41365	44748	61882	46875	CTCATGCCAAACCAGGATCCTTTTTTGCAAGCAGCACAAAACCGAGTACCAGGTTTACCTGGCCCTTTGATAAGGCCACCTGATACATGCTCCCAGACTCCCAGGCCACCTGGGCCTGGC|--TATAGACACATTCACTCATGCTTCCTCATCTGCTGTTCGTGATCCATATGATCAGCCTCCAGTGACTCCCAGGCCTCATTCTGAGTCTTTCG
Lkb1	Del 10|0	6680	55	68	2373	5764	0	0	0	0	0	0	0	0	0	ATCGACTCCACCGAGGTAATCTACCAGCCGCGCCGCAAACGCGCCAAGCTCATCGGCAAGTACCTGATGGGGGACCTGCTCGGGGAG----------|GCAAGGTGAAGGAGGTGCTGGACTCCGAGACCTTATGCCGCAGGGCGGTCAAGATCCTCAAGAAGAAAAAGCTGCGCAGGATCCCCAATGGAGAGGCCAACGTCAAGAAGTA
Lkb1	Ins 1 G	4322	3743	4763	1757	368	0	0	0	0	0	0	0	0	0	ATCGACTCCACCGAGGTAATCTACCAGCCGCGCCGCAAACGCGCCAAGCTCATCGGCAAGTACCTGATGGGGGACCTGCTCGGGGAGGGCTCGTACG{G}|GCAAGGTGAAGGAGGTGCTGGACTCCGAGACCTTATGCCGCAGGGCGGTCAAGATCCTCAAGAAGAAAAAGCTGCGCAGGATCCCCAATGGAGAGGCCAACGTCAAGAAGTA
Lkb1	Del 8|14	3963	47	62	1966	4822	0	0	0	0	0	0	0	0	0	ATCGACTCCACCGAGGTAATCTACCAGCCGCGCCGCAAACGCGCCAAGCTCATCGGCAAGTACCTGATGGGGGACCTGCTCGGGGAGGG-------- | --------------GTGCTGGACTCCGAGACCTTATGCCGCAGGGCGGTCAAGATCCTCAAGAAGAAAAAGCTGCGCAGGATCCCCAATGGAGAGGCCAACGTCAAGAAGTA
Lkb1	Del 1|0	2805	268	260	1698	185	21767	44924	23922	20497	34200	26310	35589	47630	41267	ATCGACTCCACCGAGGTAATCTACCAGCCGCGCCGCAAACGCGCCAAGCTCATCGGCAAGTACCTGATGGGGGACCTGCTCGGGGAGGGCTCGTAC-|GCAAGGTGAAGGAGGTGCTGGACTCCGAGACCTTATGCCGCAGGGCGGTCAAGATCCTCAAGAAGAAAAAGCTGCGCAGGATCCCCAATGGAGAGGCCAACGTCAAGAAGTA
Lkb1	Del 5|2	2526	4013	4891	1850	434	0	0	0	0	0	0	0	0	0	ATCGACTCCACCGAGGTAATCTACCAGCCGCGCCGCAAACGCGCCAAGCTCATCGGCAAGTACCTGATGGGGGACCTGCTCGGGGAGGGCTC----- | --AAGGTGAAGGAGGTGCTGGACTCCGAGACCTTATGCCGCAGGGCGGTCAAGATCCTCAAGAAGAAAAAGCTGCGCAGGATCCCCAATGGAGAGGCCAACGTCAAGAAGTA
Lkb1	Del 4|0	16	4413	4571	2997	3412	21060	43633	23505	19780	32618	26364	32622	35341	38735	ATCGACTCCACCGAGGTAATCTACCAGCCGCGCCGCAAACGCGCCAAGCTCATCGGCAAGTACCTGATGGGGGACCTGCTCGGGGAGGGCTCG----|GCAAGGTGAAGGAGGTGCTGGACTCCGAGACCTTATGCCGCAGGGCGGTCAAGATCCTCAAGAAGAAAAAGCTGCGCAGGATCCCCAATGGAGAGGCCAACGTCAAGAAGTA
Lkb1	Del 2|0	1	2098	2191	1337	1673	0	0	0	0	0	0	0	0	0	ATCGACTCCACCGAGGTAATCTACCAGCCGCGCCGCAAACGCGCCAAGCTCATCGGCAAGTACCTGATGGGGGACCTGCTCGGGGAGGGCTCGT--G|GCAAGGTGAAGGAGGTGCTGGACTCCGAGACCTTATGCCGCAGGGCGGTCAAGATCCTCAAGAAGAAAAAGCTGCGCAGGATCCCCAATGGAGAGGCCAACGTCAAGAAGTA
Lkb1	Del 2|0	12	1131	1278	798	975	0	0	0	0	0	0	0	0	0	ATCGACTCCACCGAGGTAATCTACCAGCCGCGCCGCAAACGCGCCAAGCTCATCGGCAAGTACCTGATGGGGGACCTGCTCGGGGAGGGCTCGTA--|GCAAGGTGAAGGAGGTGCTGGACTCCGAGACCTTATGCCGCAGGGCGGTCAAGATCCTCAAGAAGAAAAAGCTGCGCAGGATCCCCAATGGAGAGGCCAACGTCAAGAAGTA
Lkb1	Del 1|0	0	0	0	0	0	11019	43703	12183	10397	17194	14030	18389	18461	20500	ATCGACTCCACCGAGGTAATCTACCAGCCGCGCCGCAAACGCGCCAAGCTCATCGGCAAGTACCTGATGGGGGACCTGCTCGGGGAGGGCTCGTA-G|GCAAGGTGAAGGAGGTGCTGGACTCCGAGACCTTATGCCGCAGGGCGGTCAAGATCCTCAAGAAGAAAAAGCTGCGCAGGATCCCCAATGGAGAGGCCAACGTCAAGAAGTA
Mlh1	WT	810	104	88	94	102	0	0	0	0	0	0	0	0	0	ATGTGCTAAAACCTGGCCTTTTTTACTCTTTTCTCTCTTGAAACAGACCTTGCTTCCAGGACTTGCTGGGCCTTCTGGGGAGGCAGCTAGACCCACGA|CAGGGGTGGCTTCCTCATCCACTAGTGGAAGTGGCGACAAGGTCTACGCTTACCAGATGGTCCGTACGGACTCCCGGGAGCAGAAGCTTGACGCCTTTCTGCAGCCTGTAAG
Mlh1	Del 18|5	3201	63	50	448	1440	0	0	0	0	0	0	0	0	0	ATGTGCTAAAACCTGGCCTTTTTTACTCTTTTCTCTCTTGAAACAGACCTTGCTTCCAGGACTTGCTGGGCCTTCT------------------ | -----GTGGCTTCCTCATCCACTAGTGGAAGTGGCGACAAGGTCTACGCTTACCAGATGGTCCGTACGGACTCCCGGGAGCAGAAGCTTGACGCCTTTCTGCAGCCTGTAAG
Mlh1	Del 28|5	3061	69	87	473	1589	0	0	0	0	0	0	0	0	0	ATGTGCTAAAACCTGGCCTTTTTTACTCTTTTCTCTCTTGAAACAGACCTTGCTTCCAGGACTTGCTGGG---------------------------- | -----GTGGCTTCCTCATCCACTAGTGGAAGTGGCGACAAGGTCTACGCTTACCAGATGGTCCGTACGGACTCCCGGGAGCAGAAGCTTGACGCCTTTCTGCAGCCTGTAAG
Mlh1	Del 2|0	2539	1484	1464	743	437	0	0	0	0	0	0	0	0	0	ATGTGCTAAAACCTGGCCTTTTTTACTCTTTTCTCTCTTGAAACAGACCTTGCTTCCAGGACTTGCTGGGCCTTCTGGGGAGGCAGCTAGACCCAC--|CAGGGGTGGCTTCCTCATCCACTAGTGGAAGTGGCGACAAGGTCTACGCTTACCAGATGGTCCGTACGGACTCCCGGGAGCAGAAGCTTGACGCCTTTCTGCAGCCTGTAAG
Mlh1	Del 8|0	2052	938	918	440	203	0	0	0	0	0	0	0	0	0	ATGTGCTAAAACCTGGCCTTTTTTACTCTTTTCTCTCTTGAAACAGACCTTGCTTCCAGGACTTGCTGGGCCTTCTGGGGAGGCAGCTAG--------|CAGGGGTGGCTTCCTCATCCACTAGTGGAAGTGGCGACAAGGTCTACGCTTACCAGATGGTCCGTACGGACTCCCGGGAGCAGAAGCTTGACGCCTTTCTGCAGCCTGTAAG
Mlh1	Del 1|3	2015	1109	1186	469	3618	0	0	0	0	0	0	0	0	0	ATGTGCTAAAACCTGGCCTTTTTTACTCTTTTCTCTCTTGAAACAGACCTTGCTTCCAGGACTTGCTGGGCCTTCTGGGGAGGCAGCTAGACCCACG-|---GGGTGGCTTCCTCATCCACTAGTGGAAGTGGCGACAAGGTCTACGCTTACCAGATGGTCCGTACGGACTCCCGGGAGCAGAAGCTTGACGCCTTTCTGCAGCCTGTAAG
Mlh1	Ins 1 A	1138	270	323	218	292	0	0	0	0	0	0	0	0	0	ATGTGCTAAAACCTGGCCTTTTTTACTCTTTTCTCTCTTGAAACAGACCTTGCTTCCAGGACTTGCTGGGCCTTCTGGGGAGGCAGCTAGACCCACGA{A}|CAGGGGTGGCTTCCTCATCCACTAGTGGAAGTGGCGACAAGGTCTACGCTTACCAGATGGTCCGTACGGACTCCCGGGAGCAGAAGCTTGACGCCTTTCTGCAGCCTGTAAG
Mlh1	Del 4|0	9	3672	4862	3027	250	0	0	0	0	0	0	0	0	0	ATGTGCTAAAACCTGGCCTTTTTTACTCTTTTCTCTCTTGAAACAGACCTTGCTTCCAGGACTTGCTGGGCCTTCTGGGGAGGCAGCTAGACCC----|CAGGGGTGGCTTCCTCATCCACTAGTGGAAGTGGCGACAAGGTCTACGCTTACCAGATGGTCCGTACGGACTCCCGGGAGCAGAAGCTTGACGCCTTTCTGCAGCCTGTAAG
Mlh1	Del 1|0	17	3571	4743	2978	3583	0	0	0	0	0	0	0	0	0	ATGTGCTAAAACCTGGCCTTTTTTACTCTTTTCTCTCTTGAAACAGACCTTGCTTCCAGGACTTGCTGGGCCTTCTGGGGAGGCAGCTAGACCCACG-|CAGGGGTGGCTTCCTCATCCACTAGTGGAAGTGGCGACAAGGTCTACGCTTACCAGATGGTCCGTACGGACTCCCGGGAGCAGAAGCTTGACGCCTTTCTGCAGCCTGTAAG
Mlh1	Del 5|0	67	2678	2617	2103	2545	0	0	0	0	0	0	0	0	0	ATGTGCTAAAACCTGGCCTTTTTTACTCTTTTCTCTCTTGAAACAGACCTTGCTTCCAGGACTTGCTGGGCCTTCTGGGGAGGCAGCTAGACC-----|CAGGGGTGGCTTCCTCATCCACTAGTGGAAGTGGCGACAAGGTCTACGCTTACCAGATGGTCCGTACGGACTCCCGGGAGCAGAAGCTTGACGCCTTTCTGCAGCCTGTAAG
Mlh1	Del 3|0	0	0	0	0	0	5213	42942	8751	7316	16901	17455	14743	23004	18518	ATGTGCTAAAACCTGGCCTTTTTTACTCTTTTCTCTCTTGAAACAGACCTTGCTTCCAGGACTTGCTGGGCCTTCTGGGGAGGCAGCTAGACCCA---|CAGGGGTGGCTTCCTCATCCACTAGTGGAAGTGGCGACAAGGTCTACGCTTACCAGATGGTCCGTACGGACTCCCGGGAGCAGAAGCTTGACGCCTTTCTGCAGCCTGTAAG
Mlh1	Del 0|1	0	0	0	0	0	4695	183	8344	6175	7832	14397	14130	13392	17451	ATGTGCTAAAACCTGGCCTTTTTTACTCTTTTCTCTCTTGAAACAGACCTTGCTTCCAGGACTTGCTGGGCCTTCTGGGGAGGCAGCTAGACCCACGA|CA-GGGTGGCTTCCTCATCCACTAGTGGAAGTGGCGACAAGGTCTACGCTTACCAGATGGTCCGTACGGACTCCCGGGAGCAGAAGCTTGACGCCTTTCTGCAGCCTGTAAG
Mst1	WT	224	74	50	30	53	0	0	0	0	0	0	0	0	0	TGGGGTCAATCAAGCCTAAGGAGGGAGTGATAGGCCTGCCCCCACTTAGAAGTGCATTGGCCCTGTTTCCAGCTGTTTGTGTTCTGTGCAACGGTGAGGATTA|CCGTGGCGAGGTAGACGTTACAGAGTCAGGGCGGGAGTGTCAACGCTGGGACCTGCAGCACCCCCACTCGCACCCTTTCCAGCCTGAAAAGTATGTAGGCA
Mst1	Del 1|0	2575	3077	2305	1393	2054	4596	12773	6943	5407	10091	18146	12505	13635	0	TGGGGTCAATCAAGCCTAAGGAGGGAGTGATAGGCCTGCCCCCACTTAGAAGTGCATTGGCCCTGTTTCCAGCTGTTTGTGTTCTGTGCAACGGTGAGGATT-|CCGTGGCGAGGTAGACGTTACAGAGTCAGGGCGGGAGTGTCAACGCTGGGACCTGCAGCACCCCCACTCGCACCCTTTCCAGCCTGAAAAGTATGTAGGCA
Mst1	Del 31|23	807	54	67	169	533	0	0	0	0	0	0	0	0	0	TGGGGTCAATCAAGCCTAAGGAGGGAGTGATAGGCCTGCCCCCACTTAGAAGTGCATTGGCCCTGTTTCCAG------------------------------- | -----------------------AGTCAGGGCGGGAGTGTCAACGCTGGGACCTGCAGCACCCCCACTCGCACCCTTTCCAGCCTGAAAAGTATGTAGGCA
Mst1	Del 3|0	593	528	413	144	51	0	0	0	0	0	0	0	0	0	TGGGGTCAATCAAGCCTAAGGAGGGAGTGATAGGCCTGCCCCCACTTAGAAGTGCATTGGCCCTGTTTCCAGCTGTTTGTGTTCTGTGCAACGGTGAGGA---|CCGTGGCGAGGTAGACGTTACAGAGTCAGGGCGGGAGTGTCAACGCTGGGACCTGCAGCACCCCCACTCGCACCCTTTCCAGCCTGAAAAGTATGTAGGCA
Mst1	Del 7|0	13	995	867	588	685	0	0	0	0	0	0	0	0	0	TGGGGTCAATCAAGCCTAAGGAGGGAGTGATAGGCCTGCCCCCACTTAGAAGTGCATTGGCCCTGTTTCCAGCTGTTTGTGTTCTGTGCAACGGT-------A|CCGTGGCGAGGTAGACGTTACAGAGTCAGGGCGGGAGTGTCAACGCTGGGACCTGCAGCACCCCCACTCGCACCCTTTCCAGCCTGAAAAGTATGTAGGCA
Mst1	Ins 1A	0	0	0	0	0	3059	12198	4569	3728	10015	12271	10813	19416	7469	TGGGGTCAATCAAGCCTAAGGAGGGAGTGATAGGCCTGCCCCCACTTAGAAGTGCATTGGCCCTGTTTCCAGCTGTTTGTGTTCTGTGCAACGGTGAGGATTA{A}|CCGTGGCGAGGTAGACGTTACAGAGTCAGGGCGGGAGTGTCAACGCTGGGACCTGCAGCACCCCCACTCGCACCCTTTCCAGCCTGAAAAGTATGTAGGCA
Mst1	Del 5|1	0	0	0	0	0	1459	15855	2209	1744	4756	6556	5706	1209	3155	TGGGGTCAATCAAGCCTAAGGAGGGAGTGATAGGCCTGCCCCCACTTAGAAGTGCATTGGCCCTGTTTCCAGCTGTTTGTGTTCTGTGCAACGGTGAG-----|-CGTGGCGAGGTAGACGTTACAGAGTCAGGGCGGGAGTGTCAACGCTGGGACCTGCAGCACCCCCACTCGCACCCTTTCCAGCCTGAAAAGTATGTAGGCA
Msx1	WT	44069	57165	66000	22516	4857	17364	1823	22777	32078	36098	32164	18314	42160	42239	TCATGGCCGATCACAGGAAGCCCGGGGCCAAGGAGAGCGTCCTGGTGGCCTCCGAAGGGGCTCAGGCAGCGGGTGGCTCGGTGCAGCACTTGGGCACCCGGCCCGGGT|CTCTGGGCGCCCCGGATGCGCCCTCCTCGCCGCGGCCTCTCGGCCATTTCTCAGTCGGAGGACTCCTCAAGCTGCCAGAAGATGCTCTGGTGAAGGCCGAAAGCCCCGAGAAACTAGA
Msx1	Del 0|2	18354	596	1523	5588	20096	15929	51642	21218	714	33490	28205	39354	27755	44278	TCATGGCCGATCACAGGAAGCCCGGGGCCAAGGAGAGCGTCCTGGTGGCCTCCGAAGGGGCTCAGGCAGCGGGTGGCTCGGTGCAGCACTTGGGCACCCGGCCCGGGT|--CTGGGCGCCCCGGATGCGCCCTCCTCGCCGCGGCCTCTCGGCCATTTCTCAGTCGGAGGACTCCTCAAGCTGCCAGAAGATGCTCTGGTGAAGGCCGAAAGCCCCGAGAAACTAGA
Msx1	Del 19|22	10966	31	72	4363	16985	0	0	0	0	0	0	0	0	0	TCATGGCCGATCACAGGAAGCCCGGGGCCAAGGAGAGCGTCCTGGTGGCCTCCGAAGGGGCTCAGGCAGCGGGTGGCTCGGTGCAGCAC------------------- | ----------------------CTCCTCGCCGCGGCCTCTCGGCCATTTCTCAGTCGGAGGACTCCTCAAGCTGCCAGAAGATGCTCTGGTGAAGGCCGAAAGCCCCGAGAAACTAGA
Msx1	Del 0|3	0	0	0	0	0	17755	73314	23204	23341	36425	39923	36495	58153	45052	TCATGGCCGATCACAGGAAGCCCGGGGCCAAGGAGAGCGTCCTGGTGGCCTCCGAAGGGGCTCAGGCAGCGGGTGGCTCGGTGCAGCACTTGGGCACCCGGCCCGGGT|---TGGGCGCCCCGGATGCGCCCTCCTCGCCGCGGCCTCTCGGCCATTTCTCAGTCGGAGGACTCCTCAAGCTGCCAGAAGATGCTCTGGTGAAGGCCGAAAGCCCCGAGAAACTAGA
Nf1	WT	63860	31561	39022	24490	29949	18377	669734	27828	23913	54690	50935	47258	53682	40904	GACTGTGTGGAGGGATTATGTTTTAAATGTAGGATGTGTGGCTGTGGCTATTGGCCTGACTGTGTGTTTCTTTAGGTGTATGGTGCTACTTACCTACAAAAGCTCTTGGACCCTTT|ATTACGAGTCATCATCACATCTTCGGATTGGCAACATGTTAGCTTTGAAGTGGATCCTACCAGGTTTGTCATCTTGTCACAGTTGCTCCCTCACTC
Nf1	Del 22|13	10818	13	27	878	4140	5	0	1	4	0	0	0	0	0	GACTGTGTGGAGGGATTATGTTTTAAATGTAGGATGTGTGGCTGTGGCTATTGGCCTGACTGTGTGTTTCTTTAGGTGTATGGTGCTACTTACC----------------------|-------------ATCATCACATCTTCGGATTGGCAACATGTTAGCTTTGAAGTGGATCCTACCAGGTTTGTCATCTTGTCACAGTTGCTCCCTCACTC
Nf1	Ins 1 A	40	27432	32551	23497	28727	0	0	0	0	0	0	0	0	0	GACTGTGTGGAGGGATTATGTTTTAAATGTAGGATGTGTGGCTGTGGCTATTGGCCTGACTGTGTGTTTCTTTAGGTGTATGGTGCTACTTACCTACAAAAGCTCTTGGACCCTTT|{A}ATTACGAGTCATCATCACATCTTCGGATTGGCAACATGTTAGCTTTGAAGTGGATCCTACCAGGTTTGTCATCTTGTCACAGTTGCTCCCTCACTC
Nf1	Del 0|2	9	11101	13141	9611	11321	0	0	0	0	0	0	0	0	0	GACTGTGTGGAGGGATTATGTTTTAAATGTAGGATGTGTGGCTGTGGCTATTGGCCTGACTGTGTGTTTCTTTAGGTGTATGGTGCTACTTACCTACAAAAGCTCTTGGACCCTTT|--TACGAGTCATCATCACATCTTCGGATTGGCAACATGTTAGCTTTGAAGTGGATCCTACCAGGTTTGTCATCTTGTCACAGTTGCTCCCTCACTC
Nf1	Del 0|3	4	5203	6144	4574	5554	0	0	0	0	0	0	0	0	0	GACTGTGTGGAGGGATTATGTTTTAAATGTAGGATGTGTGGCTGTGGCTATTGGCCTGACTGTGTGTTTCTTTAGGTGTATGGTGCTACTTACCTACAAAAGCTCTTGGACCCTTT|---ACGAGTCATCATCACATCTTCGGATTGGCAACATGTTAGCTTTGAAGTGGATCCTACCAGGTTTGTCATCTTGTCACAGTTGCTCCCTCACTC
Nf1	Del 2|3	0	0	0	0	0	7833	211939	14647	10349	29168	22822	20343	32502	21215	GACTGTGTGGAGGGATTATGTTTTAAATGTAGGATGTGTGGCTGTGGCTATTGGCCTGACTGTGTGTTTCTTTAGGTGTATGGTGCTACTTACCTACAAAAGCTCTTGGACCCT--|---ACGAGTCATCATCACATCTTCGGATTGGCAACATGTTAGCTTTGAAGTGGATCCTACCAGGTTTGTCATCTTGTCACAGTTGCTCCCTCACTC
Notch3	WT	27845	19774	25440	12328	11865	0	0	0	0	0	0	0	0	0	CATACGCTGTGAGAGCCAGGTGGATGAGTGCCGCAGCCAGCCCTGTCGATATGGGGGCAAATGTCTAGACTTGGTGGACAAGTACCTCTGCCGTTGTCC|TCCCGGAACCACAGGTGGGGCCTGGGGCTGGGCTATAACAGTACGTGGGGGTGTGTGGGGGTCTGTGATGAATTTGTAACTGGTGCTTGACAATAGTAGGTACTCTTGCCATACTTCTTCCCTCCCT
Notch3	Del 0|2	6575	17	21	2697	8732	0	0	0	0	0	0	0	0	0	CATACGCTGTGAGAGCCAGGTGGATGAGTGCCGCAGCCAGCCCTGTCGATATGGGGGCAAATGTCTAGACTTGGTGGACAAGTACCTCTGCCGTTGTCC|--CCGGAACCACAGGTGGGGCCTGGGGCTGGGCTATAACAGTACGTGGGGGTGTGTGGGGGTCTGTGATGAATTTGTAACTGGTGCTTGACAATAGTAGGTACTCTTGCCATACTTCTTCCCTCCCT
Notch3	Del 1|0	126	7807	7447	6474	7856	27551	83924	35030	27818	52754	53386	34280	55303	46009	CATACGCTGTGAGAGCCAGGTGGATGAGTGCCGCAGCCAGCCCTGTCGATATGGGGGCAAATGTCTAGACTTGGTGGACAAGTACCTCTGCCGTTGTC-|TCCCGGAACCACAGGTGGGGCCTGGGGCTGGGCTATAACAGTACGTGGGGGTGTGTGGGGGTCTGTGATGAATTTGTAACTGGTGCTTGACAATAGTAGGTACTCTTGCCATACTTCTTCCCTCCCT
Notch3	Del 3|0	0	3146	3045	2769	3178	0	0	0	0	0	0	0	0	0	CATACGCTGTGAGAGCCAGGTGGATGAGTGCCGCAGCCAGCCCTGTCGATATGGGGGCAAATGTCTAGACTTGGTGGACAAGTACCTCTGCCGTT---C|TCCCGGAACCACAGGTGGGGCCTGGGGCTGGGCTATAACAGTACGTGGGGGTGTGTGGGGGTCTGTGATGAATTTGTAACTGGTGCTTGACAATAGTAGGTACTCTTGCCATACTTCTTCCCTCCCT
Notch3	Del 0|1	1227	1981	2005	1656	2064	8767	30000	11728	9469	17903	17675	11546	19285	15566	CATACGCTGTGAGAGCCAGGTGGATGAGTGCCGCAGCCAGCCCTGTCGATATGGGGGCAAATGTCTAGACTTGGTGGACAAGTACCTCTGCCGTTGTCC|-CCCGGAACCACAGGTGGGGCCTGGGGCTGGGCTATAACAGTACGTGGGGGTGTGTGGGGGTCTGTGATGAATTTGTAACTGGTGCTTGACAATAGTAGGTACTCTTGCCATACTTCTTCCCTCCCT
P53	WT	2499	727	1278	862	1032	0	0	0	0	0	0	0	0	0	AGCCATAGGGGTTTGTTTGTTTGTATGTTTTTTAATTGACAAGTTATGCATCCATACAGTACACAATCTCTTCTCTCTACAGATGACTGCCATGGAGGAGTCACAGTCGGATATCAGCCTCGAGCTCCCTCTGA|GCCAGGAGACATTTTCAGGCTTATGGAAACTGTGAGTGGATCTTTTTGGGGCCCTTAAGATACATCCCGCCATACCTGTATCCTCCCCTTGCCTGAGAGAA
P53	Del 1|0	13195	23541	39552	27626	32763	18152	63208	15704	20332	24835	38330	35614	32850	32984	AGCCATAGGGGTTTGTTTGTTTGTATGTTTTTTAATTGACAAGTTATGCATCCATACAGTACACAATCTCTTCTCTCTACAGATGACTGCCATGGAGGAGTCACAGTCGGATATCAGCCTCGAGCTCCCTCTG-|GCCAGGAGACATTTTCAGGCTTATGGAAACTGTGAGTGGATCTTTTTGGGGCCCTTAAGATACATCCCGCCATACCTGTATCCTCCCCTTGCCTGAGAGAA
P53	Del 11|0	11909	70	113	156	290	0	0	0	0	0	0	0	0	0	AGCCATAGGGGTTTGTTTGTTTGTATGTTTTTTAATTGACAAGTTATGCATCCATACAGTACACAATCTCTTCTCTCTACAGATGACTGCCATGGAGGAGTCACAGTCGGATATCAGCCTCGA-----------|GCCAGGAGACATTTTCAGGCTTATGGAAACTGTGAGTGGATCTTTTTGGGGCCCTTAAGATACATCCCGCCATACCTGTATCCTCCCCTTGCCTGAGAGAA
P53	Del 0|5	10272	57	84	117	240	0	0	0	0	0	0	0	0	0	AGCCATAGGGGTTTGTTTGTTTGTATGTTTTTTAATTGACAAGTTATGCATCCATACAGTACACAATCTCTTCTCTCTACAGATGACTGCCATGGAGGAGTCACAGTCGGATATCAGCCTCGAGCTCCCTCTGA|-----GAGACATTTTCAGGCTTATGGAAACTGTGAGTGGATCTTTTTGGGGCCCTTAAGATACATCCCGCCATACCTGTATCCTCCCCTTGCCTGAGAGAA
P53	Ins 1 A	6370	13657	23208	15533	18744	25039	62265	32141	26315	51049	47637	49157	57605	59419	AGCCATAGGGGTTTGTTTGTTTGTATGTTTTTTAATTGACAAGTTATGCATCCATACAGTACACAATCTCTTCTCTCTACAGATGACTGCCATGGAGGAGTCACAGTCGGATATCAGCCTCGAGCTCCCTCTGA{T}|GCCAGGAGACATTTTCAGGCTTATGGAAACTGTGAGTGGATCTTTTTGGGGCCCTTAAGATACATCCCGCCATACCTGTATCCTCCCCTTGCCTGAGAGAA
Pik3r1	WT	48449	131521	150395	95430	114482	38349	88631	35956	40418	58529	56329	55442	65929	54647	AGTGTGTGGTTACTCAAAGTTGAAAAGTAAGTATGGTCTTATACTGTGTTCATTTTAGGGAAGAAGTGAATGAAAAACTCCGAGACACTGCTGATGGGACCTTTT|TGGTACGAGACGCATCTACTAAAATGCACGGCGATTACACTCTTACACTAAGGTGAGCCAGGAAGTCAGCTGTAATTGCGATGTCTCAGTTGTCATGA
Pik3r1	Ins 1 T	79775	3445	3983	1483	1311	18118	43153	17499	18480	38981	27473	26111	45946	33273	AGTGTGTGGTTACTCAAAGTTGAAAAGTAAGTATGGTCTTATACTGTGTTCATTTTAGGGAAGAAGTGAATGAAAAACTCCGAGACACTGCTGATGGGACCTTTT|{T}TGGTACGAGACGCATCTACTAAAATGCACGGCGATTACACTCTTACACTAAGGTGAGCCAGGAAGTCAGCTGTAATTGCGATGTCTCAGTTGTCATGA
Pik3r1	Del 3|0	38722	89	113	341	1130	0	0	0	0	0	0	0	0	0	AGTGTGTGGTTACTCAAAGTTGAAAAGTAAGTATGGTCTTATACTGTGTTCATTTTAGGGAAGAAGTGAATGAAAAACTCCGAGACACTGCTGATGGGACCT---|TGGTACGAGACGCATCTACTAAAATGCACGGCGATTACACTCTTACACTAAGGTGAGCCAGGAAGTCAGCTGTAATTGCGATGTCTCAGTTGTCATGA
Pik3r1	Del 1|0	28418	2202	2308	1295	1212	0	0	0	0	0	0	0	0	0	AGTGTGTGGTTACTCAAAGTTGAAAAGTAAGTATGGTCTTATACTGTGTTCATTTTAGGGAAGAAGTGAATGAAAAACTCCGAGACACTGCTGATGGGACCTTT-|TGGTACGAGACGCATCTACTAAAATGCACGGCGATTACACTCTTACACTAAGGTGAGCCAGGAAGTCAGCTGTAATTGCGATGTCTCAGTTGTCATGA
Pten	Del 4|0	4322	3719	6953	2389	482	5289	13096	4904	6048	11154	10756	8800	11589	11593	CTTTTGTCTCCCTCCTCCCTCTGCCCCCTGGGCCTATCAGGGAGTCACAATTCCCAGTCAGAGGCGCTATGTATATTATTATAGCTACCTGCTAAAAAATCACCTGGATTAC----|CCGTGGCACTGCTGTTTCACAAGATGATGTTTGAAACTATTCCAATGTTCAGTGGCGGAACTTGCAGTAAGTGCTCTAAATTCTTAGCTGTCTGTGTGTCGGA
Pten	Del 1|0	3089	3041	2800	1963	631	10671	40497	14535	12981	22981	21163	15717	27390	21909	CTTTTGTCTCCCTCCTCCCTCTGCCCCCTGGGCCTATCAGGGAGTCACAATTCCCAGTCAGAGGCGCTATGTATATTATTATAGCTACCTGCTAAAAAATCACCTGGATTACAGA-|CCGTGGCACTGCTGTTTCACAAGATGATGTTTGAAACTATTCCAATGTTCAGTGGCGGAACTTGCAGTAAGTGCTCTAAATTCTTAGCTGTCTGTGTGTCGGA
Pten	Del 44|15	2849	6	17	1436	4246	0	0	0	0	0	0	0	0	0	CTTTTGTCTCCCTCCTCCCTCTGCCCCCTGGGCCTATCAGGGAGTCACAATTCCCAGTCAGAGGCGCTATGT-------------------------------------------- | ---------------TTCACAAGATGATGTTTGAAACTATTCCAATGTTCAGTGGCGGAACTTGCAGTAAGTGCTCTAAATTCTTAGCTGTCTGTGTGTCGGA
Pten	Del 1|0	2493	2	7	953	2793	0	0	0	0	0	0	0	0	0	CTTTTGTCTCCCTCCTCCCTCTGCCCCCTGGGCCTATCAGGGAGTCACAATTCCCAGTCAGAGGCGCTATGTATATTATTATAGCTACCTGCTAAAAAATCACCTGGATTACAG-C|CCGTGGCACTGCTGTTTCACAAGATGATGTTTGAAACTATTCCAATGTTCAGTGGCGGAACTTGCAGTAAGTGCTCTAAATTCTTAGCTGTCTGTGTGTCGGA
Pten	Del 9|0	0	0	0	0	0	5069	11856	6591	6442	11085	11282	8965	11646	10391	CTTTTGTCTCCCTCCTCCCTCTGCCCCCTGGGCCTATCAGGGAGTCACAATTCCCAGTCAGAGGCGCTATGTATATTATTATAGCTACCTGCTAAAAAATCACCTGG--------- | -CGTGGCACTGCTGTTTCACAAGATGATGTTTGAAACTATTCCAATGTTCAGTGGCGGAACTTGCAGTAAGTGCTCTAAATTCTTAGCTGTCTGTGTGTCGGA
Rasa1	Del 1|0	3177	17605	24377	14967	15166	31935	49874	19265	27119	58214	50207	50955	69926	69391	AGCGTGCCGGGTCAAGTTACCCGCGGCCCTGCCGGTGGCAGCCGCCCCGTGTCCCGGGCTGGCGGACGCCGACT|TGGTTGCGGCCCTCGGTGGCGGAGCCGCGTCGGGGTCCGGGTTCCTGGGGACCGGGCCGGTGGCCGGTGTCTTGGGGGGCGCCGCGCTGACCGGCAGTGCTGCTG
Rasa1	Ins 1 A	837	8865	10256	18	977	0	0	0	0	0	0	0	0	0	AGCGTGCCGGGTCAAGTTACCCGCGGCCCTGCCGGTGGCAGCCGCCCCGTGTCCCGGGCTGGCGGACGCCGACT|{A}TGGTTGCGGCCCTCGGTGGCGGAGCCGCGTCGGGGTCCGGGTTCCTGGGGACCGGGCCGGTGGCCGGTGTCTTGGGGGGCGCCGCGCTGACCGGCAGTGCTGCTG
Rasa1	Del 12|22	525	51	37	3728	14889	0	0	0	0	0	0	0	0	0	AGCGTGCCGGGTCAAGTTACCCGCGGCCCTGCCGGTGGCAGCCGCCCCGTGTCCCGGGCTGG------------|----------------------AGCCGCGTCGGGGTCCGGGTTCCTGGGGACCGGGCCGGTGGCCGGTGTCTTGGGGGGCGCCGCGCTGACCGGCAGTGCTGCTG
Rasa1	Del 0|3	0	0	0	0	0	17561	27768	11781	14953	16470	26924	26748	25388	18692	AGCGTGCCGGGTCAAGTTACCCGCGGCCCTGCCGGTGGCAGCCGCCCCGTGTCCCGGGCTGGCGGACGCCGACT|---TTGCGGCCCTCGGTGGCGGAGCCGCGTCGGGGTCCGGGTTCCTGGGGACCGGGCCGGTGGCCGGTGTCTTGGGGGGCGCCGCGCTGACCGGCAGTGCTGCTG
Rb1	WT	1485	21919	29962	21141	21579	157	162	6829	0	5	174	229	129	108	TACAGAAACAGCTGCAATCCCCATTAATGGTTCACCTCGAACACCCAGAAGAGGTCAGAACAGGAGCGCTCGGATAGCAAAACAACTAGAAAATGAT|ACGAGGATTATCGAGGTTCTCTGTAAAGAACACGAGTGTAATATAGATGAGGTAATTTCTCTTACACTTTATTTAAAACAGCTGAAGTAGATATATATGCTAAGTCTGCCTGTCA
Rb1	Del 2|0	44843	3271	5320	4275	6630	8896	29194	6643	8195	13049	20586	15629	15109	15448	TACAGAAACAGCTGCAATCCCCATTAATGGTTCACCTCGAACACCCAGAAGAGGTCAGAACAGGAGCGCTCGGATAGCAAAACAACTAGAAAAT--T|ACGAGGATTATCGAGGTTCTCTGTAAAGAACACGAGTGTAATATAGATGAGGTAATTTCTCTTACACTTTATTTAAAACAGCTGAAGTAGATATATATGCTAAGTCTGCCTGTCA
Rb1	Del 22|5	28797	76	123	1557	4177	0	0	0	0	0	0	0	0	0	TACAGAAACAGCTGCAATCCCCATTAATGGTTCACCTCGAACACCCAGAAGAGGTCAGAACAGGAGCGCTCGGAT----------------------|-----GATTATCGAGGTTCTCTGTAAAGAACACGAGTGTAATATAGATGAGGTAATTTCTCTTACACTTTATTTAAAACAGCTGAAGTAGATATATATGCTAAGTCTGCCTGTCA
Rb1	Ins 1 T	14735	27879	39287	27869	25866	0	0	0	0	0	0	0	0	0	TACAGAAACAGCTGCAATCCCCATTAATGGTTCACCTCGAACACCCAGAAGAGGTCAGAACAGGAGCGCTCGGATAGCAAAACAACTAGAAAATGAT{T}|ACGAGGATTATCGAGGTTCTCTGTAAAGAACACGAGTGTAATATAGATGAGGTAATTTCTCTTACACTTTATTTAAAACAGCTGAAGTAGATATATATGCTAAGTCTGCCTGTCA
Rb1	Del 1|0	14642	3351	5539	2403	1125	18906	31243	13764	17481	25995	37723	29761	28894	31576	TACAGAAACAGCTGCAATCCCCATTAATGGTTCACCTCGAACACCCAGAAGAGGTCAGAACAGGAGCGCTCGGATAGCAAAACAACTAGAAAATG-T|ACGAGGATTATCGAGGTTCTCTGTAAAGAACACGAGTGTAATATAGATGAGGTAATTTCTCTTACACTTTATTTAAAACAGCTGAAGTAGATATATATGCTAAGTCTGCCTGTCA
Rb1	Del 5|0	0	4236	6382	4752	4829	0	0	0	0	0	0	0	0	0	TACAGAAACAGCTGCAATCCCCATTAATGGTTCACCTCGAACACCCAGAAGAGGTCAGAACAGGAGCGCTCGGATAGCAAAACAACTAGAA-----T|ACGAGGATTATCGAGGTTCTCTGTAAAGAACACGAGTGTAATATAGATGAGGTAATTTCTCTTACACTTTATTTAAAACAGCTGAAGTAGATATATATGCTAAGTCTGCCTGTCA
Rb1	Del 6|21	0	0	0	0	0	8485	30646	6641	8916	13672	22901	14485	25139	11511	TACAGAAACAGCTGCAATCCCCATTAATGGTTCACCTCGAACACCCAGAAGAGGTCAGAACAGGAGCGCTCGGATAGCAAAACAACTAGAA------|---------------------TGTAAAGAACACGAGTGTAATATAGATGAGGTAATTTCTCTTACACTTTATTTAAAACAGCTGAAGTAGATATATATGCTAAGTCTGCCTGTCA
Rb1	Del 1|2	0	0	0	0	0	9081	29602	6546	8214	12140	18644	14994	14340	15682	TACAGAAACAGCTGCAATCCCCATTAATGGTTCACCTCGAACACCCAGAAGAGGTCAGAACAGGAGCGCTCGGATAGCAAAACAACTAGAAAATGA-|--GAGGATTATCGAGGTTCTCTGTAAAGAACACGAGTGTAATATAGATGAGGTAATTTCTCTTACACTTTATTTAAAACAGCTGAAGTAGATATATATGCTAAGTCTGCCTGTCA
Rps6ka3	WT	8025	45738	25972	22145	8883	26019	95380	39631	33600	56205	70002	55705	66042	53446	GAGAGTCATTCTGGGCTAACAATGGGTTGTCTCTATATTTACCTTAACAGGAAGAAGGCAGTATCAAAGAAATTGCAATCACACATCATGTGAAGGAAGGACATG|AAAAGGCAGATCCTTCCCAGTTTGAACTTTTAAAAGTATTAGGGCAGGGATCATTTGGAAAGGTAAGTCATAGTTGTTTGC
Rps6ka3	Del 5|6	5700	146	66	7037	26113	0	0	0	0	0	0	0	0	0	GAGAGTCATTCTGGGCTAACAATGGGTTGTCTCTATATTTACCTTAACAGGAAGAAGGCAGTATCAAAGAAATTGCAATCACACATCATGTGAAGGAAGG----- | ------CAGATCCTTCCCAGTTTGAACTTTTAAAAGTATTAGGGCAGGGATCATTTGGAAAGGTAAGTCATAGTTGTTTGC
Runx3	WT	6970	23155	14893	5158	2595	0	0	0	0	0	0	0	0	0	GACAGCCCCAACTTCCTCTGCTCCGTGCTGCCCTCGCACTGGCGCTGCAACAAGACGCTGCCGGTCGCCT|TCAAGGTGAGTGCAGGGGCCCGAGCCGGGAGGACACCGGGGAACCTGGGCGCCCCCATTTGCAGGAGCCCATACCGGGGAGGACTTGGGGAGCACCTAGAAGTAGGACATGAAAGGGGATGTCACCCAG
Runx3	Del 1|0	5824	292	1147	4213	25991	19322	80827	40341	30654	74379	40626	47984	59988	68041	GACAGCCCCAACTTCCTCTGCTCCGTGCTGCCCTCGCACTGGCGCTGCAACAAGACGCTGCCGGTCGCC-|TCAAGGTGAGTGCAGGGGCCCGAGCCGGGAGGACACCGGGGAACCTGGGCGCCCCCATTTGCAGGAGCCCATACCGGGGAGGACTTGGGGAGCACCTAGAAGTAGGACATGAAAGGGGATGTCACCCAG
Runx3	Del 0|2	0	0	0	0	0	3887	26053	7039	5491	11349	9950	7464	10818	967	GACAGCCCCAACTTCCTCTGCTCCGTGCTGCCCTCGCACTGGCGCTGCAACAAGACGCTGCCGGTCGCCT|--AAGGTGAGTGCAGGGGCCCGAGCCGGGAGGACACCGGGGAACCTGGGCGCCCCCATTTGCAGGAGCCCATACCGGGGAGGACTTGGGGAGCACCTAGAAGTAGGACATGAAAGGGGATGTCACCCAG
Setd5	WT	8950	7115	9167	4481	1300	3279	370	112	5121	243	2330	436	169	213	GCCCTGGTTTTAGTAGGTAATCGCTCAGAAGGAAAGTTTTAACTCCTGGGAAAGCCCCTTCTATGCTAATTTATTCTATCGGGCGCCTTTGCCTTTCTCATTCTTAGGAATAAGGATCTTTCTCCTGTG|TACTGATGCTGCAGCCCGCCCTGCTGGCCTGGGTCAGGGGTGCGTGGATGACCTGCATTTTCTGCTTTCTCATGTTACTTGTGTAACGTCTTCACC
Setd5	Del 0|2	2139	395	394	2461	5002	0	0	0	0	0	0	0	0	0	GCCCTGGTTTTAGTAGGTAATCGCTCAGAAGGAAAGTTTTAACTCCTGGGAAAGCCCCTTCTATGCTAATTTATTCTATCGGGCGCCTTTGCCTTTCTCATTCTTAGGAATAAGGATCTTTCTCCTG--|TACTGATGCTGCAGCCCGCCCTGCTGGCCTGGGTCAGGGGTGCGTGGATGACCTGCATTTTCTGCTTTCTCATGTTACTTGTGTAACGTCTTCACC
Setd5	Del 5|0	1938	414	367	1375	2787	0	0	0	0	0	0	0	0	0	GCCCTGGTTTTAGTAGGTAATCGCTCAGAAGGAAAGTTTTAACTCCTGGGAAAGCCCCTTCTATGCTAATTTATTCTATCGGGCGCCTTTGCCTTTCTCATTCTTAGGAATAAGGATCTTTCTCCTGTG|-----ATGCTGCAGCCCGCCCTGCTGGCCTGGGTCAGGGGTGCGTGGATGACCTGCATTTTCTGCTTTCTCATGTTACTTGTGTAACGTCTTCACC
Setd5	Ins 1 A	4	2734	2200	2054	1854	0	0	0	0	0	0	0	0	0	GCCCTGGTTTTAGTAGGTAATCGCTCAGAAGGAAAGTTTTAACTCCTGGGAAAGCCCCTTCTATGCTAATTTATTCTATCGGGCGCCTTTGCCTTTCTCATTCTTAGGAATAAGGATCTTTCTCCTGTG|{A}TACTGATGCTGCAGCCCGCCCTGCTGGCCTGGGTCAGGGGTGCGTGGATGACCTGCATTTTCTGCTTTCTCATGTTACTTGTGTAACGTCTTCACC
Setd5	Del 8|0	0	853	810	735	676	0	0	0	0	0	0	0	0	0	GCCCTGGTTTTAGTAGGTAATCGCTCAGAAGGAAAGTTTTAACTCCTGGGAAAGCCCCTTCTATGCTAATTTATTCTATCGGGCGCCTTTGCCTTTCTCATTCTTAGGAATAAGGATCTT--------G|TACTGATGCTGCAGCCCGCCCTGCTGGCCTGGGTCAGGGGTGCGTGGATGACCTGCATTTTCTGCTTTCTCATGTTACTTGTGTAACGTCTTCACC
Setd5	Del 0|25	0	631	654	502	557	0	0	0	0	0	0	0	0	0	GCCCTGGTTTTAGTAGGTAATCGCTCAGAAGGAAAGTTTTAACTCCTGGGAAAGCCCCTTCTATGCTAATTTATTCTATCGGGCGCCTTTGCCTTTCTCATTCTTAGGAATAAGGATCTTTCTCCTG-G|TACTGATGCTGCAGCCCGCCCTGCTGGCCTGGGTCAGGGGTGCGTGGATGACCTGCATTTTCTGCTTTCTCATGTTACTTGTGTAACGTCTTCACC
Setd5	Del 0|3	0	0	0	0	0	11619	20245	7161	8546	14790	19380	16396	15963	23672	GCCCTGGTTTTAGTAGGTAATCGCTCAGAAGGAAAGTTTTAACTCCTGGGAAAGCCCCTTCTATGCTAATTTATTCTATCGGGCGCCTTTGCCTTTCTCATTCTTAGGAATAAGGATCTTTCTCCTGTG|------------------------GGCCTGGGTCAGGGGTGCGTGGATGACCTGCATTTTCTGCTTTCTCATGTTACTTGTGTAACGTCTTCACC
Setd5	Del 6|1	0	0	0	0	0	11969	20780	7275	8399	7316	20958	20207	26074	24238	GCCCTGGTTTTAGTAGGTAATCGCTCAGAAGGAAAGTTTTAACTCCTGGGAAAGCCCCTTCTATGCTAATTTATTCTATCGGGCGCCTTTGCCTTTCTCATTCTTAGGAATAAGGATCTTTCTCCTGTG|-ACTGATGCTGCAGCCCGCCCTGCTGGCCTGGGTCAGGGGTGCGTGGATGACCTGCATTTTCTGCTTTCTCATGTTACTTGTGTAACGTCTTCACC
Setd5	Del 0|1	0	0	0	0	0	11952	21264	7463	8472	15126	19784	16182	29387	24298	GCCCTGGTTTTAGTAGGTAATCGCTCAGAAGGAAAGTTTTAACTCCTGGGAAAGCCCCTTCTATGCTAATTTATTCTATCGGGCGCCTTTGCCTTTCTCATTCTTAGGAATAAGGATCTTTCTCCTGTG|-ACTGATGCTGCAGCCCGCCCTGCTGGCCTGGGTCAGGGGTGCGTGGATGACCTGCATTTTCTGCTTTCTCATGTTACTTGTGTAACGTCTTCACC
Smad4	WT	32063	16744	18202	7191	3294	599	432	127	458	182	424	208	30	152	AGTACGTTCACGACTTTGAAGGACAGCCGTCCTTACCCACTGAAGGACATTCGATTCAAACCATCCAACACCCGCCAAGTAATCGCGCATCAACGGAGACGTACAGCG|CCCCGGCTCTGTTAGCCCCGGCAGAGTCTAACGCCACCAGCACCACCAACTTCCCCAACATTCCTGTGGCTTCCACAAGTGAGTGTTGCAGTCAGATCGAGTCGAAAGTTTTC
Smad4	Del 16|0	15012	24	35	1848	6186	0	0	0	0	0	0	0	0	0	AGTACGTTCACGACTTTGAAGGACAGCCGTCCTTACCCACTGAAGGACATTCGATTCAAACCATCCAACACCCGCCAAGTAATCGCGCATCA----------------|CCCCGGCTCTGTTAGCCCCGGCAGAGTCTAACGCCACCAGCACCACCAACTTCCCCAACATTCCTGTGGCTTCCACAAGTGAGTGTTGCAGTCAGATCGAGTCGAAAGTTTTC
Smad4	Del 2|0	1495	19482	20987	18000	18767	7887	72201	34531	30530	55199	35356	43196	44218	49658	AGTACGTTCACGACTTTGAAGGACAGCCGTCCTTACCCACTGAAGGACATTCGATTCAAACCATCCAACACCCGCCAAGTAATCGCGCATCAACGGAGACGTACAG--|CCCCGGCTCTGTTAGCCCCGGCAGAGTCTAACGCCACCAGCACCACCAACTTCCCCAACATTCCTGTGGCTTCCACAAGTGAGTGTTGCAGTCAGATCGAGTCGAAAGTTTTC
Smad4	Del 8|0	12	17175	18840	15671	17292	0	0	0	0	0	0	0	0	0	AGTACGTTCACGACTTTGAAGGACAGCCGTCCTTACCCACTGAAGGACATTCGATTCAAACCATCCAACACCCGCCAAGTAATCGCGCATCAACGGAGAC--------|CCCCGGCTCTGTTAGCCCCGGCAGAGTCTAACGCCACCAGCACCACCAACTTCCCCAACATTCCTGTGGCTTCCACAAGTGAGTGTTGCAGTCAGATCGAGTCGAAAGTTTTC
Smad4	Del 39|50	2185	503	809	3685	11169	0	0	0	0	0	0	0	0	0	AGTACGTTCACGACTTTGAAGGACAGCCGTCCTTACCCACTGAAGGACATTCGATTCAAACCATCCAAC--------------------------------------- | --------------------------------------------------TTCCCCAACATTCCTGTGGCTTCCACAAGTGAGTGTTGCAGTCAGATCGAGTCGAAAGTTTTC
Smad4	Del 1|0	0	0	0	0	0	8191	73970	37034	31358	57074	35841	44513	72591	56084	AGTACGTTCACGACTTTGAAGGACAGCCGTCCTTACCCACTGAAGGACATTCGATTCAAACCATCCAACACCCGCCAAGTAATCGCGCATCAACGGAGACGTACAGC-|CCCCGGCTCTGTTAGCCCCGGCAGAGTCTAACGCCACCAGCACCACCAACTTCCCCAACATTCCTGTGGCTTCCACAAGTGAGTGTTGCAGTCAGATCGAGTCGAAAGTTTTC
Tet2	WT	17363	42443	101326	25475	3813	37685	68029	37099	31335	67796	70555	66866	69166	67518	CACCGTCACAATCACTTCTTGCTCCCCGTCTTGTTCTTCAGCCTCCTTTAGAAGGAAAAGGCGCTCTAAATGATGTAGCTTTGGAAGAACACCATGACTACCCCAAC|CGAAGCAACCGAACTCTTTTAAGGGAAGGGAAAATAGACCATCAACCCAAGACATCATCTAGCCAGAGTCTGAATCCATCTGTACATACACCCAACCCCCCCTTGATGCTTCCAGAACAGCAT
Tet2	Del 2|4	18713	16563	171	36714	29488	0	0	0	0	0	0	0	0	0	CACCGTCACAATCACTTCTTGCTCCCCGTCTTGTTCTTCAGCCTCCTTTAGAAGGAAAAGGCGCTCTAAATGATGTAGCTTTGGAAGAACACCATGACTACCCCA--|----GCAACCGAACTCTTTTAAGGGAAGGGAAAATAGACCATCAACCCAAGACATCATCTAGCCAGAGTCTGAATCCATCTGTACATACACCCAACCCCCCCTTGATGCTTCCAGAACAGCAT
Tet2	Del 0|9	13867	7	179	20856	28877	0	0	0	0	0	0	0	0	0	CACCGTCACAATCACTTCTTGCTCCCCGTCTTGTTCTTCAGCCTCCTTTAGAAGGAAAAGGCGCTCTAAATGATGTAGCTTTGGAAGAACACCATGACTACCCCAAC|---------CGAACTCTTTTAAGGGAAGGGAAAATAGACCATCAACCCAAGACATCATCTAGCCAGAGTCTGAATCCATCTGTACATACACCCAACCCCCCCTTGATGCTTCCAGAACAGCAT
Tsc1	WT	99338	70770	76176	37290	17510	144	188	307	131	70	175	29097	154	158	TACTCTGCGACACAGAACATGCCCAGCATTTTCACTGTGCTTCCATTTCAGGAAGAAAGAGCAGATTCCTCAAGGCCTTACCTTCACAGACAGTCAAACGACCGAGG|ATTAGGTAAACTCCCTGGGTAATGATGGGCCTTGCTTGCCTCTTGGCATTGAACTCTGTAGCTTAAAAGCTAAGCTGGGTGGAAGAAGGATTTTCTGGGATAGCACCTATGCT
Tsc1	Del 5|3	33695	4724	5047	14380	29982	0	0	0	0	0	0	0	0	0	TACTCTGCGACACAGAACATGCCCAGCATTTTCACTGTGCTTCCATTTCAGGAAGAAAGAGCAGATTCCTCAAGGCCTTACCTTCACAGACAGTCAAACGAC-----|---AGGTAAACTCCCTGGGTAATGATGGGCCTTGCTTGCCTCTTGGCATTGAACTCTGTAGCTTAAAAGCTAAGCTGGGTGGAAGAAGGATTTTCTGGGATAGCACCTATGCT
Tsc1	Del 1|0	1026	16994	15754	15009	14807	14007	44920	10336	17594	31707	35651	29838	31359	31151	TACTCTGCGACACAGAACATGCCCAGCATTTTCACTGTGCTTCCATTTCAGGAAGAAAGAGCAGATTCCTCAAGGCCTTACCTTCACAGACAGTCAAACGACCGAG-|ATTAGGTAAACTCCCTGGGTAATGATGGGCCTTGCTTGCCTCTTGGCATTGAACTCTGTAGCTTAAAAGCTAAGCTGGGTGGAAGAAGGATTTTCTGGGATAGCACCTATGCT
Tsc1	Del 4|0	5	5951	5751	5822	6129	0	0	0	0	0	0	0	0	0	TACTCTGCGACACAGAACATGCCCAGCATTTTCACTGTGCTTCCATTTCAGGAAGAAAGAGCAGATTCCTCAAGGCCTTACCTTCACAGACAGTCAAACGACC----|ATTAGGTAAACTCCCTGGGTAATGATGGGCCTTGCTTGCCTCTTGGCATTGAACTCTGTAGCTTAAAAGCTAAGCTGGGTGGAAGAAGGATTTTCTGGGATAGCACCTATGCT
Tsc1	Del 11|0	5	4598	4957	4937	5330	0	0	0	0	0	0	0	0	0	TACTCTGCGACACAGAACATGCCCAGCATTTTCACTGTGCTTCCATTTCAGGAAGAAAGAGCAGATTCCTCAAGGCCTTACCTTCACAGACAGTCA-----------|ATTAGGTAAACTCCCTGGGTAATGATGGGCCTTGCTTGCCTCTTGGCATTGAACTCTGTAGCTTAAAAGCTAAGCTGGGTGGAAGAAGGATTTTCTGGGATAGCACCTATGCT
Tsc1	Del 0|2	0	0	0	0	0	15188	46251	21389	18609	32782	34512	17732	45010	30776	TACTCTGCGACACAGAACATGCCCAGCATTTTCACTGTGCTTCCATTTCAGGAAGAAAGAGCAGATTCCTCAAGGCCTTACCTTCACAGACAGTCAAACGACCGAGG|--TAGGTAAACTCCCTGGGTAATGATGGGCCTTGCTTGCCTCTTGGCATTGAACTCTGTAGCTTAAAAGCTAAGCTGGGTGGAAGAAGGATTTTCTGGGATAGCACCTATGCT
Tsc1	Del 8|11	0	0	0	0	0	11477	40526	17135	14504	25000	35301	17732	13380	21620	TACTCTGCGACACAGAACATGCCCAGCATTTTCACTGTGCTTCCATTTCAGGAAGAAAGAGCAGATTCCTCAAGGCCTTACCTTCACAGACAGTCAAAC--------|-----------TCCCTGGGTAATGATGGGCCTTGCTTGCCTCTTGGCATTGAACTCTGTAGCTTAAAAGCTAAGCTGGGTGGAAGAAGGATTTTCTGGGATAGCACCTATGCT
Tsc2	Del 3|0	33288	11061	11663	5137	7897	0	0	0	0	0	0	0	0	0	CTAAGGTCCCTGGAGGCTACACCCTTCTCACTGTCCCCTTTTTGTCATGGCAGCATGCAGTGGAGGCACTTTGGAAGGCTGTCTCAGACTTGCTACAGCCAGAGCGGC---|CAGAGGCCCGGCATGCAGTTCTCACCTTATTGAAGGCCATTGTACAGGGACAGGTAAGGGGTGGAGCTGTGTGAGCCTGTGGGATGAAGGCAGACCGTCACCGTTTGAGCTCCTGC
Tsc2	Del 2|0	31322	136	120	563	2223	13099	21336	11659	11726	17702	24515	21279	29436	25980	CTAAGGTCCCTGGAGGCTACACCCTTCTCACTGTCCCCTTTTTGTCATGGCAGCATGCAGTGGAGGCACTTTGGAAGGCTGTCTCAGACTTGCTACAGCCAGAGCGGCC--|CAGAGGCCCGGCATGCAGTTCTCACCTTATTGAAGGCCATTGTACAGGGACAGGTAAGGGGTGGAGCTGTGTGAGCCTGTGGGATGAAGGCAGACCGTCACCGTTTGAGCTCCTGC
Tsc2	Del 0|3	19151	1298	2809	771	195	0	0	0	0	0	0	0	0	0	CTAAGGTCCCTGGAGGCTACACCCTTCTCACTGTCCCCTTTTTGTCATGGCAGCATGCAGTGGAGGCACTTTGGAAGGCTGTCTCAGACTTGCTACAGCCAGAGCGGCCAC|---AGGCCCGGCATGCAGTTCTCACCTTATTGAAGGCCATTGTACAGGGACAGGTAAGGGGTGGAGCTGTGTGAGCCTGTGGGATGAAGGCAGACCGTCACCGTTTGAGCTCCTGC
Tsc2	Del 1|0	16242	20699	20893	10952	17229	12808	20311	12364	10924	17779	24548	21507	17928	26333	CTAAGGTCCCTGGAGGCTACACCCTTCTCACTGTCCCCTTTTTGTCATGGCAGCATGCAGTGGAGGCACTTTGGAAGGCTGTCTCAGACTTGCTACAGCCAGAGCGGCCA-|CAGAGGCCCGGCATGCAGTTCTCACCTTATTGAAGGCCATTGTACAGGGACAGGTAAGGGGTGGAGCTGTGTGAGCCTGTGGGATGAAGGCAGACCGTCACCGTTTGAGCTCCTGC
Tsc2	Del 12|0	562	3841	3734	2065	3499	0	0	0	0	0	0	0	0	0	CTAAGGTCCCTGGAGGCTACACCCTTCTCACTGTCCCCTTTTTGTCATGGCAGCATGCAGTGGAGGCACTTTGGAAGGCTGTCTCAGACTTGCTACAGC------------|CAGAGGCCCGGCATGCAGTTCTCACCTTATTGAAGGCCATTGTACAGGGACAGGTAAGGGGTGGAGCTGTGTGAGCCTGTGGGATGAAGGCAGACCGTCACCGTTTGAGCTCCTGC
Tsc2	Del 1|0	0	0	0	0	0	12443	21825	11939	10965	18022	24692	15953	28083	27048	CTAAGGTCCCTGGAGGCTACACCCTTCTCACTGTCCCCTTTTTGTCATGGCAGCATGCAGTGGAGGCACTTTGGAAGGCTGTCTCAGACTTGCTACAGCCAGAGCGGCC-C|CAGAGGCCCGGCATGCAGTTCTCACCTTATTGAAGGCCATTGTACAGGGACAGGTAAGGGGTGGAGCTGTGTGAGCCTGTGGGATGAAGGCAGACCGTCACCGTTTGAGCTCCTGC

## Sheet: MF
Target Gene	Type	1-C3	1C3-1	1C3-2	1C3-3	1C3-4	6C7	6C7-1	6C7-2	6C7-3	6C7-4	6C7-5	6C7-6	6C7-7	6C7-8	Reference
Apc	Ins 1 A	31.611	29.2389	27.7475	16.2862	6.02925	0	0	0	0	0	0	0	0	0	CATGGCATAAAGCAGTTACTACATAAGAACTTGTTTCTGTTTAGAATTTAACTTAGATAGTAATTTCCCCGGAGTGAAACTACGCTCAAAAATGTCCCTTCGCTCCTACG|{A}GAAGTCGGGAAGGATCTGTATCCAGCCGTTCAGGAGAATGCAGTCCTGTCCCCATGGGGTCATTCCCAAGAAGAACATTTGTAAATGGAAGCAGAGAGAGTACTGGGTATC
Apc	Del 1|0	16.216	54.8387	54.629	50.4025	40.0239	34.6741	33.7136	35.4106	34.6058	34.8105	33.999	36.0347	41.2635	35.8966	CATGGCATAAAGCAGTTACTACATAAGAACTTGTTTCTGTTTAGAATTTAACTTAGATAGTAATTTCCCCGGAGTGAAACTACGCTCAAAAATGTCCCTTCGCTCCTAC-|GAAGTCGGGAAGGATCTGTATCCAGCCGTTCAGGAGAATGCAGTCCTGTCCCCATGGGGTCATTCCCAAGAAGAACATTTGTAAATGGAAGCAGAGAGAGTACTGGGTATC
Apc	Del 0|3	0.00315502	14.4759	15.7495	16.4572	15.6418	0	0	0	0	0	0	0	0	0	CATGGCATAAAGCAGTTACTACATAAGAACTTGTTTCTGTTTAGAATTTAACTTAGATAGTAATTTCCCCGGAGTGAAACTACGCTCAAAAATGTCCCTTCGCTCCTACG|---GTCGGGAAGGATCTGTATCCAGCCGTTCAGGAGAATGCAGTCCTGTCCCCATGGGGTCATTCCCAAGAAGAACATTTGTAAATGGAAGCAGAGAGAGTACTGGGTATC
Apc	Del 0|5	26.2884	0.738017	1.05107	8.97012	20.3626	0	0	0	0	0	0	0	0	0	CATGGCATAAAGCAGTTACTACATAAGAACTTGTTTCTGTTTAGAATTTAACTTAGATAGTAATTTCCCCGGAGTGAAACTACGCTCAAAAATGTCCCTTCGCTCCTACG|-----CGGGAAGGATCTGTATCCAGCCGTTCAGGAGAATGCAGTCCTGTCCCCATGGGGTCATTCCCAAGAAGAACATTTGTAAATGGAAGCAGAGAGAGTACTGGGTATC
Apc	Del 3|3	25.8814	0.708497	0.823004	7.884	17.9424	0	0	0	0	0	0	0	0	0	CATGGCATAAAGCAGTTACTACATAAGAACTTGTTTCTGTTTAGAATTTAACTTAGATAGTAATTTCCCCGGAGTGAAACTACGCTCAAAAATGTCCCTTCGCTCCT---|---GTCGGGAAGGATCTGTATCCAGCCGTTCAGGAGAATGCAGTCCTGTCCCCATGGGGTCATTCCCAAGAAGAACATTTGTAAATGGAAGCAGAGAGAGTACTGGGTATC
Apc	Del 0|2	0	0	0	0	0	34.4638	33.7261	34.8207	34.4234	34.6053	33.4418	33.6564	38.4475	35.6661	CATGGCATAAAGCAGTTACTACATAAGAACTTGTTTCTGTTTAGAATTTAACTTAGATAGTAATTTCCCCGGAGTGAAACTACGCTCAAAAATGTCCCTTCGCTCCTACG|--AGTCGGGAAGGATCTGTATCCAGCCGTTCAGGAGAATGCAGTCCTGTCCCCATGGGGTCATTCCCAAGAAGAACATTTGTAAATGGAAGCAGAGAGAGTACTGGGTATC
Apc	Del 4|1	0	0	0	0	0	30.8621	32.5603	29.7688	30.9707	30.5842	32.5592	30.3089	20.2889	28.4373	CATGGCATAAAGCAGTTACTACATAAGAACTTGTTTCTGTTTAGAATTTAACTTAGATAGTAATTTCCCCGGAGTGAAACTACGCTCAAAAATGTCCCTTCGCTCC----|-AAGTCGGGAAGGATCTGTATCCAGCCGTTCAGGAGAATGCAGTCCTGTCCCCATGGGGTCATTCCCAAGAAGAACATTTGTAAATGGAAGCAGAGAGAGTACTGGGTATC
Apob	Del 0|1	31.2929	55.5239	51.0778	22.9036	12.1268	59.9282	31.9426	57.1169	56.3517	55.8744	64.8534	58.8015	66.531	59.0362	TCCGAAGACCCTGTAGAGCAAGCAGCAGGGGCTAGGCCCGTGGCCAGGCCACAGCCAGGAAGCCACCCCACCATCCATCCGCCATGGGCCCACGAAAGCCTGCCCTGC|-GACGCCGTTACTGCTGCTGTTCCTGCTACTGTTCTTGGACACCAGCGTCTGGGCTCGTGAGTTAGGGTGGAAGCCTGGGAGAAAGCCA
Apob	Del 0|12	28.8441	0.185487	0.479042	18.7317	40.3061	0	0	0	0	0	0	0	0	0	TCCGAAGACCCTGTAGAGCAAGCAGCAGGGGCTAGGCCCGTGGCCAGGCCACAGCCAGGAAGCCACCCCACCATCCATCCGCCATGGGCCCACGAAAGCCTGCCCTGC|G------------GCTGCTGTTCCTGCTACTGTTCTTGGACACCAGCGTCTGGGCTCGTGAGTTAGGGTGGAAGCCTGGGAGAAAGCCA
Apob	Del 0|2	23.5465	0.361925	0.299401	18.8152	39.9484	0	0	0	0	0	0	0	0	0	TCCGAAGACCCTGTAGAGCAAGCAGCAGGGGCTAGGCCCGTGGCCAGGCCACAGCCAGGAAGCCACCCCACCATCCATCCGCCATGGGCCCACGAAAGCCTGCCCTGC|G--CGCCGTTACTGCTGCTGTTCCTGCTACTGTTCTTGGACACCAGCGTCTGGGCTCGTGAGTTAGGGTGGAAGCCTGGGAGAAAGCCA
Apob	Ins 1 G	15.8702	25.2262	21.7365	15.9366	2.77385	0	0	0	0	0	0	0	0	0	TCCGAAGACCCTGTAGAGCAAGCAGCAGGGGCTAGGCCCGTGGCCAGGCCACAGCCAGGAAGCCACCCCACCATCCATCCGCCATGGGCCCACGAAAGCCTGCCCTGC|{G}GGACGCCGTTACTGCTGCTGTTCCTGCTACTGTTCTTGGACACCAGCGTCTGGGCTCGTGAGTTAGGGTGGAAGCCTGGGAGAAAGCCA
Apob	Del 19|91	0.446363	18.7025	26.4072	23.6128	4.84488	0	0	0	0	0	0	0	0	0	TCCGAAGACCCTGTAGAGCAAGCAGCAGGGGCTAGGCCCGTGGCCAGGCCACAGCCAGGAAGCCACCCCACCATCCATCCGCCATGGGC------------------- | -------------------------------------------------------------------------------------------TGGGAGAAAGCCA
Apob	Del 0|6	0	0	0	0	0	13.9151	33.2895	14.0493	14.8041	14.2406	16.3138	14.0708	11.2648	13.3645	TCCGAAGACCCTGTAGAGCAAGCAGCAGGGGCTAGGCCCGTGGCCAGGCCACAGCCAGGAAGCCACCCCACCATCCATCCGCCATGGGCCCACGAAAGCCTGCCCTGC|------CGTTACTGCTGCTGTTCCTGCTACTGTTCTTGGACACCAGCGTCTGGGCTCGTGAGTTAGGGTGGAAGCCTGGGAGAAAGCCA
Apob	Del 0|9	0	0	0	0	0	26.1567	34.7679	28.8338	28.8442	29.885	18.8328	27.1277	22.2042	27.5993	TCCGAAGACCCTGTAGAGCAAGCAGCAGGGGCTAGGCCCGTGGCCAGGCCACAGCCAGGAAGCCACCCCACCATCCATCCGCCATGGGCCCACGAAAGCCTGCCCTGC|G---------ACTGCTGCTGTTCCTGCTACTGTTCTTGGACACCAGCGTCTGGGCTCGTGAGTTAGGGTGGAAGCCTGGGAGAAAGCCA
Arid1a	Del 11|16	11.9461	72.2939	52.6756	23.3189	2.50689	0	0	0	0	0	0	0	0	0	TATGCAGAGGAACCCCCAGATGCCCCAGTACACTTCCCCTCAGCCTGGCTCGGCCTTATCCCCACGTCAGCCGTCTGGAGGACAG----------- | ----------------CAGAACTCCATGGGGAGCTACGGCCCCCAGGGCAGTCAGTATGGCCCACAAGGTAAGTGTGCTACCCCTTTAGAAGGAAAGAGAGGTACTGTGTTAACGGCTG
Arid1a	Del 24|25	10.9414	27.5312	43.7022	20.2169	1.98045	0	0	0	0	0	0	0	0	0	TATGCAGAGGAACCCCCAGATGCCCCAGTACACTTCCCCTCAGCCTGGCTCGGCCTTATCCCCACGTCAGCC------------------------ | -------------------------ATGGGGAGCTACGGCCCCCAGGGCAGTCAGTATGGCCCACAAGGTAAGTGTGCTACCCCTTTAGAAGGAAAGAGAGGTACTGTGTTAACGGCTG
Arid1a	Del 10|9	26.7685	0.0656024	0.254823	31.3449	52.3189	0	0	0	0	0	0	0	0	0	TATGCAGAGGAACCCCCAGATGCCCCAGTACACTTCCCCTCAGCCTGGCTCGGCCTTATCCCCACGTCAGCCGTCTGGAGGACAGA---------- | ---------CTACCAGCAGAACTCCATGGGGAGCTACGGCCCCCAGGGCAGTCAGTATGGCCCACAAGGTAAGTGTGCTACCCCTTTAGAAGGAAAGAGAGGTACTGTGTTAACGGCTG
Arid1a	Del 0|4	50.3441	0.109337	3.36731	25.1193	43.1938	29.3199	30.6364	34.8091	28.4394	28.5352	35.6287	29.4881	23.0657	16.6956	TATGCAGAGGAACCCCCAGATGCCCCAGTACACTTCCCCTCAGCCTGGCTCGGCCTTATCCCCACGTCAGCCGTCTGGAGGACAGATGCACTCGGG|----GGCTCCTACCAGCAGAACTCCATTAGGGGAGCTACGGCCCCCAGGGCAGTCAGTATGGCCCACAAGGTAAGTGTGCTACCCCTTTAGAAGGAAAGAGAGGTACTGTGTTAACGGCTG
Arid1a	Del 1|2	0	0	0	0	0	36.2596	36.9346	44.4792	37.0636	36.7433	46.3285	36.2799	32.8657	41.4358	TATGCAGAGGAACCCCCAGATGCCCCAGTACACTTCCCCTCAGCCTGGCTCGGCCTTATCCCCACGTCAGCCGTCTGGAGGACAGATGCACTCGG-|--TGGGCTCCTACCAGCAGAACTCCATTAGGGGAGCTACGGCCCCCAGGGCAGTCAGTATGGCCCACAAGGTAAGTGTGCTACCCCTTTAGAAGGAAAGAGAGGTACTGTGTTAACGGCTG
Arid1a	Del 0|2	0	0	0	0	0	34.4205	32.429	20.7116	34.497	34.7214	18.0429	34.2321	44.0686	41.8686	TATGCAGAGGAACCCCCAGATGCCCCAGTACACTTCCCCTCAGCCTGGCTCGGCCTTATCCCCACGTCAGCCGTCTGGAGGACAGATGCACTCGGG|--TGGGCTCCTACCAGCAGAACTCCATTAGGGGAGCTACGGCCCCCAGGGCAGTCAGTATGGCCCACAAGGTAAGTGTGCTACCCCTTTAGAAGGAAAGAGAGGTACTGTGTTAACGGCTG
Arid1b	WT	71.7234	3.87389	5.266	6.7461	4.32088	0	0	0	0	0	0	0	0	0	CTTGGGCAAGGACCTAGGCGCCCAGTACGCCGCTGCCAGCCCGGCCTGGGCGGCCGCGCAACAAAGGAGTCACCCGGCGATGAGCCCCGGCACCCCCG|GACCGACCATGGGCAGATCCCAGGTAACCCCCGCGCCCGGCCGGGCCTGCTTCCGCCCGGGCCTCGCGCCGCGAGCCCGACTTTCTTTCTTCGCCGGGTACTTTTCCCGGCGGTTG
Arid1b	Del 23|24	17.1994	94.7814	94.5499	93.2526	95.6791	96.4618	99.9105	99.9591	99.9226	9.95387	99.9327	99.9229	99.8728	99.9353	CTTGGGCAAGGACCTAGGCGCCCAGTACGCCGCTGCCAGCCCGGCCTGGGCGGCCGCGCAACAAAGGAGTCACCC----------------------- | ------------------------TAACCCCCGCGCCCGGCCGGGCCTGCTTCCGCCCGGGCCTCGCGCCGCGAGCCCGACTTTCTTTCTTCGCCGGGTACTTTTCCCGGCGGTTG
Arid1b	Del 1|0	11.0771	1.34468	0.184122	0.00130574	0	0	0	0	0	0	0	0	0	0	CTTGGGCAAGGACCTAGGCGCCCAGTACGCCGCTGCCAGCCCGGCCTGGGCGGCCGCGCAACAAAGGAGTCACCCGGCGATGAGCCCCGGCACCCCC-|GACCGACCATGGGCAGATCCCAGGTAACCCCCGCGCCCGGCCGGGCCTGCTTCCGCCCGGGCCTCGCGCCGCGAGCCCGACTTTCTTTCTTCGCCGGGTACTTTTCCCGGCGGTTG
Arid1b	Del 24|23	0	0	0	0	0	3.53816	0.0894845	0.0408518	0.0774321	90.0461	0.0673182	0.0771252	0.127228	0.0647065	CTTGGGCAAGGACCTAGGCGCCCAGTACGCCGCTGCCAGCCCGGCCTGGGCGGCCGCGCAACAAAGGAGTCACC------------------------ | -----------------------GTAACCCCCGCGCCCGGCCGGGCCTGCTTCCGCCCGGGCCTCGCGCCGCGAGCCCGACTTTCTTTCTTCGCCGGGTACTTTTCCCGGCGGTTG
Arid2	Del 0|3	35.7362	0.191377	0.539455	25.4451	85.2144	24.4698	22.5784	23.5178	30.6291	25.1414	26.2236	24.676	19.946	24.9147	CAGCTTAACATAGGGCTTCCTGTGGTATATAATGTCTTTATTCCTCTCTCTCTCTCTTTTAGGCTAAATGCTCATTTTGAAGTAAATCCAGAC|---TCCGTCTCTCGGGCAGAAATGTATTCAGAGTACCTCTCAACTTGCAGTAAATTAGCTCGCGGTGGCATCCTCACATCAACTGGGTTTTATAAGTGTCTTAGGTAACTCGCACAGCTC
Arid2	Ins 2 AG	22.1784	33.2146	32.5682	18.5319	3.79264	0	0	0	0	0	0	0	0	0	CAGCTTAACATAGGGCTTCCTGTGGTATATAATGTCTTTATTCCTCTCTCTCTCTCTTTTAGGCTAAATGCTCATTTTGAAGTAAATCCAGAC|{AG}TGTTCCGTCTCTCGGGCAGAAATGTATTCAGAGTACCTCTCAACTTGCAGTAAATTAGCTCGCGGTGGCATCCTCACATCAACTGGGTTTTATAAGTGTCTTAGGTAACTCGCACAGCTC
Arid2	Del 0|2	21.4778	32.7734	33.249	19.6658	7.03086	0	0	0	0	0	0	0	0	0	CAGCTTAACATAGGGCTTCCTGTGGTATATAATGTCTTTATTCCTCTCTCTCTCTCTTTTAGGCTAAATGCTCATTTTGAAGTAAATCCAGAC|--TTCCGTCTCTCGGGCAGAAATGTATTCAGAGTACCTCTCAACTTGCAGTAAATTAGCTCGCGGTGGCATCCTCACATCAACTGGGTTTTATAAGTGTCTTAGGTAACTCGCACAGCTC
Arid2	Ins 1 T	20.6076	33.8206	33.6434	36.3572	3.96214	75.5302	77.4216	76.4822	69.3709	74.8586	73.7764	75.324	80.054	75.0853	CAGCTTAACATAGGGCTTCCTGTGGTATATAATGTCTTTATTCCTCTCTCTCTCTCTTTTAGGCTAAATGCTCATTTTGAAGTAAATCCAGAC|{T}TGTTCCGTCTCTCGGGCAGAAATGTATTCAGAGTACCTCTCAACTTGCAGTAAATTAGCTCGCGGTGGCATCCTCACATCAACTGGGTTTTATAAGTGTCTTAGGTAACTCGCACAGCTC
Atm	WT	75.9388	46.8004	46.692	45.819	44.7666	100	100	100	100	100	100	100	100	100	TCTGTCATTCATTGGTGAAGAAATCAAAGTAGAAAAACATTGAGCGACTGCTCTAAAGTCCTATTATTCCCATTTTCTTAAACATCATGTTTTTCCTTTCTGCAGGTTTTAGAGAAAGTCTCCGAATC|GTTTGGATGTAGAAGTTTAGAAGACTTCATGATTTCTCACCTAGACTACCTGGTTTTGGAATGGCTGAACCTTCAAGATACTG
Atm	Del 8|0	0.00569307	32.8229	32.8852	32.9314	33.0649	0	0	0	0	0	0	0	0	0	TCTGTCATTCATTGGTGAAGAAATCAAAGTAGAAAAACATTGAGCGACTGCTCTAAAGTCCTATTATTCCCATTTTCTTAAACATCATGTTTTTCCTTTCTGCAGGTTTTAGAGAAAGTC--------|GTTTGGATGTAGAAGTTTAGAAGACTTCATGATTTCTCACCTAGACTACCTGGTTTTGGAATGGCTGAACCTTCAAGATACTG
Atm	Del 0|6	0.0102475	19.9781	20.0004	20.2374	20.3862	0	0	0	0	0	0	0	0	0	TCTGTCATTCATTGGTGAAGAAATCAAAGTAGAAAAACATTGAGCGACTGCTCTAAAGTCCTATTATTCCCATTTTCTTAAACATCATGTTTTTCCTTTCTGCAGGTTTTAGAGAAAGTCTCCGAATC|------ATGTAGAAGTTTAGAAGACTTCATGATTTCTCACCTAGACTACCTGGTTTTGGAATGGCTGAACCTTCAAGATACTG
Atm	Del 3|0	24.0453	0.39857	0.42239	1.01213	1.78223	0	0	0	0	0	0	0	0	0	TCTGTCATTCATTGGTGAAGAAATCAAAGTAGAAAAACATTGAGCGACTGCTCTAAAGTCCTATTATTCCCATTTTCTTAAACATCATGTTTTTCCTTTCTGCAGGTTTTAGAGAAAGTCTCCGA---|GTTTGGATGTAGAAGTTTAGAAGACTTCATGATTTCTCACCTAGACTACCTGGTTTTGGAATGGCTGAACCTTCAAGATACTG
Axin1	Del 1|0	81.8154	99.9802	99.936	81.8121	56.0504	68.9022	69.1527	68.4693	68.6919	69.3872	68.2727	64.4561	78.1706	67.8897	GTTCTGAGGCCCGTCATCTGGTCCCTGCCTCAGCCAATAGGCGGCAGGAGCCCGAGCTGCAGCCTAGAGTCACGCTTCTGCCTCCCAGCCACACAGTGGCCAAGAGCAG-|GACCGGCTTCCTAGAGTGGCTGAAAGTGCTCGGACGGACAGCCAAGCCCATCATGGCGGACAGCGGGACAGTGGGTCGTGATCAGGCACTTGGAGCCAGGCAGGTGAGGTAA
Axin1	Del 12|0	18.1846	0.019765	0.063968	18.1879	43.9496	0	0	0	0	0	0	0	0	0	GTTCTGAGGCCCGTCATCTGGTCCCTGCCTCAGCCAATAGGCGGCAGGAGCCCGAGCTGCAGCCTAGAGTCACGCTTCTGCCTCCCAGCCACACAGTG------------|GACCGGCTTCCTAGAGTGGCTGAAAGTGCTCGGACGGACAGCCAAGCCCATCATGGCGGACAGCGGGACAGTGGGTCGTGATCAGGCACTTGGAGCCAGGCAGGTGAGGTAA
Axin1	Ins 1 G	0	0	0	0	0	31.0978	30.8473	31.5307	31.3081	30.6128	31.7273	35.5439	21.8294	32.1103	GTTCTGAGGCCCGTCATCTGGTCCCTGCCTCAGCCAATAGGCGGCAGGAGCCCGAGCTGCAGCCTAGAGTCACGCTTCTGCCTCCCAGCCACACAGTGGCCAAGAGCAGG{G}|GACCGGCTTCCTAGAGTGGCTGAAAGTGCTCGGACGGACAGCCAAGCCCATCATGGCGGACAGCGGGACAGTGGGTCGTGATCAGGCACTTGGAGCCAGGCAGGTGAGGTAA
Cdkn2a	WT	11.1063	1.14887	0.994863	1.04912	0.885875	0	0	0	0	0	0	0	0	0	CAGGTGATGATGATGGGCAACGTTCACGTAGCAGCTCTTCTGCTCAACTACGGTGCAGATTCGAACTGCGAGGACCCCACTACCTTCTCCCGCCC|GGTGCACGACGCAGCGCGGGAAGGCTTCCTGGACACGCTGGTGGTGCTGCACGGGTCAGGGGCTCGGCTGGATGTGCGCGATGCCTGGGGTCGCCTGCCGCTCGACTTGGCCCAAGA
Cdkn2a	Del 0|1	35.8284	63.7145	63.5916	48.4322	26.8006	18.1371	26.6625	19.0907	16.0587	17.2944	18.5825	19.1555	15.8773	1.47375	CAGGTGATGATGATGGGCAACGTTCACGTAGCAGCTCTTCTGCTCAACTACGGTGCAGATTCGAACTGCGAGGACCCCACTACCTTCTCCCGCCC|-GTGCACGACGCAGCGCGGGAAGGCTTCCTGGACACGCTGGTGGTGCTGCACGGGTCAGGGGCTCGGCTGGATGTGCGCGATGCCTGGGGTCGCCTGCCGCTCGACTTGGCCCAAGA
Cdkn2a	Del 0|5	19.9487	0.125161	0.159308	10.5551	27.9405	0	0	0	0	0	0	0	0	0	CAGGTGATGATGATGGGCAACGTTCACGTAGCAGCTCTTCTGCTCAACTACGGTGCAGATTCGAACTGCGAGGACCCCACTACCTTCTCCCGCCC|-----ACGACGCAGCGCGGGAAGGCTTCCTGGACACGCTGGTGGTGCTGCACGGGTCAGGGGCTCGGCTGGATGTGCGCGATGCCTGGGGTCGCCTGCCGCTCGACTTGGCCCAAGA
Cdkn2a	Del 0|7	18.6652	0.216697	0.23246	10.2093	24.5719	29.0725	27.0087	33.9419	29.3803	28.7967	36.1315	28.9442	26.5287	39.3376	CAGGTGATGATGATGGGCAACGTTCACGTAGCAGCTCTTCTGCTCAACTACGGTGCAGATTCGAACTGCGAGGACCCCACTACCTTCTCCCGCCC|-------GACGCAGCGCGGGAAGGCTTCCTGGACACGCTGGTGGTGCTGCACGGGTCAGGGGCTCGGCTGGATGTGCGCGATGCCTGGGGTCGCCTGCCGCTCGACTTGGCCCAAGA
Cdkn2a	Ins 1 G	14.1593	13.9527	15.3781	8.19637	1.45336	0	0	0	0	0	0	0	0	0	CAGGTGATGATGATGGGCAACGTTCACGTAGCAGCTCTTCTGCTCAACTACGGTGCAGATTCGAACTGCGAGGACCCCACTACCTTCTCCCGCCC|{G}GGTGCACGACGCAGCGCGGGAAGGCTTCCTGGACACGCTGGTGGTGCTGCACGGGTCAGGGGCTCGGCTGGATGTGCGCGATGCCTGGGGTCGCCTGCCGCTCGACTTGGCCCAAGA
Cdkn2a	Del 1|1	0.185696	13.8611	13.1657	14.3963	12.394	0	0	0	0	0	0	0	0	0	CAGGTGATGATGATGGGCAACGTTCACGTAGCAGCTCTTCTGCTCAACTACGGTGCAGATTCGAACTGCGAGGACCCCACTACCTTCTCCCGCC-|-GTGCACGACGCAGCGCGGGAAGGCTTCCTGGACACGCTGGTGGTGCTGCACGGGTCAGGGGCTCGGCTGGATGTGCGCGATGCCTGGGGTCGCCTGCCGCTCGACTTGGCCCAAGA
Cdkn2a	Del 1|0	0.106502	6.981	6.47799	7.16146	5.95368	0	0	0	0	0	0	0	0	0	CAGGTGATGATGATGGGCAACGTTCACGTAGCAGCTCTTCTGCTCAACTACGGTGCAGATTCGAACTGCGAGGACCCCACTACCTTCTCCCGCC-|GGTGCACGACGCAGCGCGGGAAGGCTTCCTGGACACGCTGGTGGTGCTGCACGGGTCAGGGGCTCGGCTGGATGTGCGCGATGCCTGGGGTCGCCTGCCGCTCGACTTGGCCCAAGA
Cdkn2a	Del 0|3	0	0	0	0	0	28.866	23.7862	18.1674	29.0782	29.2835	15.3038	27.3989	34.2973	41.1074	CAGGTGATGATGATGGGCAACGTTCACGTAGCAGCTCTTCTGCTCAACTACGGTGCAGATTCGAACTGCGAGGACCCCACTACCTTCTCCCGCCC|---GCACGACGCAGCGCGGGAAGGCTTCCTGGACACGCTGGTGGTGCTGCACGGGTCAGGGGCTCGGCTGGATGTGCGCGATGCCTGGGGTCGCCTGCCGCTCGACTTGGCCCAAGA
Cdkn2a	Ins 26bp	0	0	0	0	0	23.9244	22.5427	28.8	25.4828	24.6254	29.9822	24.5013	23.2967	18.0813	CAGGTGATGATGATGGGCAACGTTCACGTAGCAGCTCTTCTGCTCAACTACGGTGCAGATTCGAACTGCGAGGACCCCACTACCTTCTCCCGCCC| {TGGCAATCCTGCTGATTGGCCCGATT}GGTGCACGACGCAGCGCGGGAAGGCTTCCTGGACACGCTGGTGGTGCTGCACGGGTCAGGGGCTCGGCTGGATGTGCGCGATGCCTGGGGTCGCCTGCCGCTCGACTTGGCCCAAGA
Chd1	Ins 1 T	51.9401	71.1506	75.8664	55.4041	16.4408	100	100	100	100	100	100	100	100	100	AGCGACTCTGATTCTGGCTCTGACTCAGGAAGTCAATCAGAGTCTGAATCAGACACATCCCGAGAGAACAAGGTTCAAGCAAAACCACCAAAAGT{T}|CGACGGAGCCGAGGTAAGTTAGTGCAATTGAACTGGCTTAAGACAGAAGTTAAATCTTATAACTGACTGGACAGTGTCATGGCCTGGGCATATAGCGCAGCAGTACAGCAC
Chd1	Del 0|2	17.0682	19.7332	17.6471	0.121714	2.15225	0	0	0	0	0	0	0	0	0	AGCGACTCTGATTCTGGCTCTGACTCAGGAAGTCAATCAGAGTCTGAATCAGACACATCCCGAGAGAACAAGGTTCAAGCAAAACCACCAAAAGT|--ACGGAGCCGAGGTAAGTTAGTGCAATTGAACTGGCTTAAGACAGAAGTTAAATCTTATAACTGACTGGACAGTGTCATGGCCTGGGCATATAGCGCAGCAGTACAGCAC
Chd1	Del 29|13	16.5103	0.222346	0.0710858	19.0604	37.1164	0	0	0	0	0	0	0	0	0	AGCGACTCTGATTCTGGCTCTGACTCAGGAAGTCAATCAGAGTCTGAATCAGACACATCCCGAGAG----------------------------- | -------------GTAAGTTAGTGCAATTGAACTGGCTTAAGACAGAAGTTAAATCTTATAACTGACTGGACAGTGTCATGGCCTGGGCATATAGCGCAGCAGTACAGCAC
Chd1	Del 18|23	14.4687	0.166759	0.142172	19.5472	37.6644	0	0	0	0	0	0	0	0	0	AGCGACTCTGATTCTGGCTCTGACTCAGGAAGTCAATCAGAGTCTGAATCAGACACATCCCGAGAGAACAAGGTTCA------------------ | -----------------------GCAATTGAACTGGCTTAAGACAGAAGTTAAATCTTATAACTGACTGGACAGTGTCATGGCCTGGGCATATAGCGCAGCAGTACAGCAC
Chd1	Del 0|4	0.0126807	8.72707	6.27333	5.8666	6.62615	0	0	0	0	0	0	0	0	0	AGCGACTCTGATTCTGGCTCTGACTCAGGAAGTCAATCAGAGTCTGAATCAGACACATCCCGAGAGAACAAGGTTCAAGCAAAACCACCAAAAGT|----GGAGCCGAGGTAAGTTAGTGCAATTGAACTGGCTTAAGACAGAAGTTAAATCTTATAACTGACTGGACAGTGTCATGGCCTGGGCATATAGCGCAGCAGTACAGCAC
Col1a1	Ins 1 T	37.9905	9.92189	9.26332	7.91983	1.72608	0	0	0	0	0	0	0	0	0	AGTCCAAGACCTTCTCCCAGCATGAAGAGGATGCTAAACCCGTGGTAATAAGGCCAAGGCTGTGGCCCTGATGCGTCTGTGACTTCTCTCCACTTAGGGTCCTTCCGGTGA{T}|ACGTGGTGCTCCCGGACCTGCTGGTCCCAAAGGTTCTCCTGGTGAAGCTGGTCGCCCCGGTGAAGCTGGTCTCCCTGGTGCCAAGGTGAGAAGATCCTCTGTCCTGTATGG
Col1a1	Del 6|2	31.9488	0.0422208	0.104832	4.06358	10.0844	0	0	0	0	0	0	0	0	0	AGTCCAAGACCTTCTCCCAGCATGAAGAGGATGCTAAACCCGTGGTAATAAGGCCAAGGCTGTGGCCCTGATGCGTCTGTGACTTCTCTCCACTTAGGGTCCTTC------ | --GTGGTGCTCCCGGACCTGCTGGTCCCAAAGGTTCTCCTGGTGAAGCTGGTCGCCCCGGTGAAGCTGGTCTCCCTGGTGCCAAGGTGAGAAGATCCTCTGTCCTGTATGG
Col1a1	Del 9|4	29.2973	0.0633312	0.114362	4.5888	11.6135	0	0	0	0	0	0	0	0	0	AGTCCAAGACCTTCTCCCAGCATGAAGAGGATGCTAAACCCGTGGTAATAAGGCCAAGGCTGTGGCCCTGATGCGTCTGTGACTTCTCTCCACTTAGGGTCC--------- | ----GGTGCTCCCGGACCTGCTGGTCCCAAAGGTTCTCCTGGTGAAGCTGGTCGCCCCGGTGAAGCTGGTCTCCCTGGTGCCAAGGTGAGAAGATCCTCTGTCCTGTATGG
Col1a1	Del 1|0	0.714168	41.9147	42.1329	38.2308	35.1032	79.6877	67.9466	99.9842	80.6872	79.7839	79.0152	80.4963	83.5344	80.3818	AGTCCAAGACCTTCTCCCAGCATGAAGAGGATGCTAAACCCGTGGTAATAAGGCCAAGGCTGTGGCCCTGATGCGTCTGTGACTTCTCTCCACTTAGGGTCCTTCCGGTG-|ACGTGGTGCTCCCGGACCTGCTGGTCCCAAAGGTTCTCCTGGTGAAGCTGGTCGCCCCGGTGAAGCTGGTCTCCCTGGTGCCAAGGTGAGAAGATCCTCTGTCCTGTATGG
Col1a1	Del 4|0	0.0410442	20.4771	20.6709	19.1154	17.439	0	0	0	0	0	0	0	0	0	AGTCCAAGACCTTCTCCCAGCATGAAGAGGATGCTAAACCCGTGGTAATAAGGCCAAGGCTGTGGCCCTGATGCGTCTGTGACTTCTCTCCACTTAGGGTCCTTCCG----|ACGTGGTGCTCCCGGACCTGCTGGTCCCAAAGGTTCTCCTGGTGAAGCTGGTCGCCCCGGTGAAGCTGGTCTCCCTGGTGCCAAGGTGAGAAGATCCTCTGTCCTGTATGG
Col1a1	Del 0|4	0.00820883	10.5552	10.5118	9.66137	9.1182	0	0	0	0	0	0	0	0	0	AGTCCAAGACCTTCTCCCAGCATGAAGAGGATGCTAAACCCGTGGTAATAAGGCCAAGGCTGTGGCCCTGATGCGTCTGTGACTTCTCTCCACTTAGGGTCCTTCCGGTGA|----GGTGCTCCCGGACCTGCTGGTCCCAAAGGTTCTCCTGGTGAAGCTGGTCGCCCCGGTGAAGCTGGTCTCCCTGGTGCCAAGGTGAGAAGATCCTCTGTCCTGTATGG
Col1a1	Del 0|5	0	8.8136	8.8154	8.21009	7.95497	0	0	0	0	0	0	0	0	0	AGTCCAAGACCTTCTCCCAGCATGAAGAGGATGCTAAACCCGTGGTAATAAGGCCAAGGCTGTGGCCCTGATGCGTCTGTGACTTCTCTCCACTTAGGGTCCTTCCGGTGA|-----GTGCTCCCGGACCTGCTGGTCCCAAAGGTTCTCCTGGTGAAGCTGGTCGCCCCGGTGAAGCTGGTCTCCCTGGTGCCAAGGTGAGAAGATCCTCTGTCCTGTATGG
Col1a1	Del 0|3	0	8.21195	8.38654	8.21009	6.9606	0	0	0	0	0	0	0	0	0	AGTCCAAGACCTTCTCCCAGCATGAAGAGGATGCTAAACCCGTGGTAATAAGGCCAAGGCTGTGGCCCTGATGCGTCTGTGACTTCTCTCCACTTAGGGTCCTTCCGGTGA|---TGGTGCTCCCGGACCTGCTGGTCCCAAAGGTTCTCCTGGTGAAGCTGGTCGCCCCGGTGAAGCTGGTCTCCCTGGTGCCAAGGTGAGAAGATCCTCTGTCCTGTATGG
Col1a1	Del 2|0	0	0	0	0	0	20.3123	32.0534	0.0158047	19.3128	20.2161	20.9848	19.5037	16.4656	19.6182	AGTCCAAGACCTTCTCCCAGCATGAAGAGGATGCTAAACCCGTGGTAATAAGGCCAAGGCTGTGGCCCTGATGCGTCTGTGACTTCTCTCCACTTAGGGTCCTTCCGGT--|ACGTGGTGCTCCCGGACCTGCTGGTCCCAAAGGTTCTCCTGGTGAAGCTGGTCGCCCCGGTGAAGCTGGTCTCCCTGGTGCCAAGGTGAGAAGATCCTCTGTCCTGTATGG
Dlc1	WT	77.0996	74.4358	73.9348	72.9785	74.1558	14.3972	24.674	0.0207111	14.1533	14.1969	14.3469	14.873	14.1334	14.9702	ACGAAAGCATGCTGACAGACCTCAGCGAGCACCAGGAGGTGGCCTCTGTCCGAAGCCTCAGCAGCACCAGCAGCAGCGTCCCCACCCACGCAGCCCACAGTGGAGATGCCACTACGCCCCGAAC|CAATTCCGTCATCAGCGTCTGCTCCTCCGGACACTTTGTAGGCAATGATGACTCTTTTTCCAGCCTGCCGTCTCCCAAGGAACTGTCCAGCTTCAGT
Dlc1	Del 1|0	12.4675	1.57236	1.77654	1.81518	1.23213	85.6028	75.326	99.9793	85.8467	85.8031	85.6531	85.127	85.8666	85.0298	ACGAAAGCATGCTGACAGACCTCAGCGAGCACCAGGAGGTGGCCTCTGTCCGAAGCCTCAGCAGCACCAGCAGCAGCGTCCCCACCCACGCAGCCCACAGTGGAGATGCCACTACGCCCCGAA-|CAATTCCGTCATCAGCGTCTGCTCCTCCGGACACTTTGTAGGCAATGATGACTCTTTTTCCAGCCTGCCGTCTCCCAAGGAACTGTCCAGCTTCAGT
Dlc1	Del 0|16	10.3463	0.213927	0.235947	0.474422	1.15607	0	0	0	0	0	0	0	0	0	ACGAAAGCATGCTGACAGACCTCAGCGAGCACCAGGAGGTGGCCTCTGTCCGAAGCCTCAGCAGCACCAGCAGCAGCGTCCCCACCCACGCAGCCCACAGTGGAGATGCCACTACGCCCCGAAC|----------------GTCTGCTCCTCCGGACACTTTGTAGGCAATGATGACTCTTTTTCCAGCCTGCCGTCTCCCAAGGAACTGTCCAGCTTCAGT
Dlc1	Del 4|34	0.0865801	23.7779	24.0527	24.7318	23.456	0	0	0	0	0	0	0	0	0	ACGAAAGCATGCTGACAGACCTCAGCGAGCACCAGGAGGTGGCCTCTGTCCGAAGCCTCAGCAGCACCAGCAGCAGCGTCCCCACCCACGCAGCCCACAGTGGAGATGCCACTACGCCCC---- | ----------------------------------TTTGTAGGCAATGATGACTCTTTTTCCAGCCTGCCGTCTCCCAAGGAACTGTCCAGCTTCAGT
Dlc1	Del 0|2	0	0	0	0	0	0	0	0	0	0	0	0	0	0	ACGAAAGCATGCTGACAGACCTCAGCGAGCACCAGGAGGTGGCCTCTGTCCGAAGCCTCAGCAGCACCAGCAGCAGCGTCCCCACCCACGCAGCCCACAGTGGAGATGCCACTACGCCCCGAAC|--ATTCCGTCATCAGCGTCTGCTCCTCCGGACACTTTGTAGGCAATGATGACTCTTTTTCCAGCCTGCCGTCTCCCAAGGAACTGTCCAGCTTCAGT
Fbxw7	WT	84.8289	58.0233	43.7163	41.651	34.3033	0	0	0	0	0	0	0	0	0	GTGTGAGTATGCCTTCCCTATTTCCTTTTCCATAGTTGGCACTCTATGTGCTTTCATTCCTGGAACCCAAAGACCTGCTGCAAGCGGCTCAGACTTGTCGA|TACTGGAGAATTTTGGCTGAGGATAACCTTCTCTGGAGAGAGAAATGTAAAGAAGAGGGTAAGTTCAGAATCACACACAGATGTGTTTCTACTCTGGAAACAAGTTAACAGAATAACTTGGCTGTGAGTGAGAGT
Fbxw7	Del 12|11	15.0914	0.128932	0.259049	7.19813	18.5689	0	0	0	0	0	0	0	0	0	GTGTGAGTATGCCTTCCCTATTTCCTTTTCCATAGTTGGCACTCTATGTGCTTTCATTCCTGGAACCCAAAGACCTGCTGCAAGCGGCT------------|-----------TTTGGCTGAGGATAACCTTCTCTGGAGAGAGAAATGTAAAGAAGAGGGTAAGTTCAGAATCACACACAGATGTGTTTCTACTCTGGAAACAAGTTAACAGAATAACTTGGCTGTGAGTGAGAGT
Fbxw7	Del 1|0	0.053162	27.1642	35.6613	32.6074	29.843	0	0	0	0	0	0	0	0	0	GTGTGAGTATGCCTTCCCTATTTCCTTTTCCATAGTTGGCACTCTATGTGCTTTCATTCCTGGAACCCAAAGACCTGCTGCAAGCGGCTCAGACTTGTCG-|TACTGGAGAATTTTGGCTGAGGATAACCTTCTCTGGAGAGAGAAATGTAAAGAAGAGGGTAAGTTCAGAATCACACACAGATGTGTTTCTACTCTGGAAACAAGTTAACAGAATAACTTGGCTGTGAGTGAGAGT
Fbxw7	Del 3|0	0.0243659	10.764	14.8918	13.3446	12.5144	50.2457	49.9611	50.2674	48.9687	50.3006	49.9232	49.3442	50.7427	49.4753	GTGTGAGTATGCCTTCCCTATTTCCTTTTCCATAGTTGGCACTCTATGTGCTTTCATTCCTGGAACCCAAAGACCTGCTGCAAGCGGCTCAGACTTGT---|TACTGGAGAATTTTGGCTGAGGATAACCTTCTCTGGAGAGAGAAATGTAAAGAAGAGGGTAAGTTCAGAATCACACACAGATGTGTTTCTACTCTGGAAACAAGTTAACAGAATAACTTGGCTGTGAGTGAGAGT
Fbxw7	Del 8|9	0.00221508	3.91955	5.47154	5.19893	4.77042	0	0	0	0	0	0	0	0	0	GTGTGAGTATGCCTTCCCTATTTCCTTTTCCATAGTTGGCACTCTATGTGCTTTCATTCCTGGAACCCAAAGACCTGCTGCAAGCGGCTCAGA-------- | ---------ATTTTGGCTGAGGATAACCTTCTCTGGAGAGAGAAATGTAAAGAAGAGGGTAAGTTCAGAATCACACACAGATGTGTTTCTACTCTGGAAACAAGTTAACAGAATAACTTGGCTGTGAGTGAGAGT
Fbxw7	Del 0|5	0	0	0	0	0	49.7543	50.0389	49.7326	51.0313	49.6994	50.0768	50.6558	49.2573	50.5247	GTGTGAGTATGCCTTCCCTATTTCCTTTTCCATAGTTGGCACTCTATGTGCTTTCATTCCTGGAACCCAAAGACCTGCTGCAAGCGGCTCAGACTTGTCGA|-----GAGAATTTTGGCTGAGGATAACCTTCTCTGGAGAGAGAAATGTAAAGAAGAGGGTAAGTTCAGAATCACACACAGATGTGTTTCTACTCTGGAAACAAGTTAACAGAATAACTTGGCTGTGAGTGAGAGT
Hic1	WT	56.4671	71.2834	41.8021	31.8937	16.0386	4.12225	4.65612	2.44367	3.20893	2.35158	9.93789	4.53429	5.35801	9.31581	CTACGCTCCTTACGGGCGGCCCGGCCGGGGCTTGAGGGCTGCCACGCCCGTCATCCAGGCTTGCTACTCGTCCCCGGCCGGGCCACCGCCGCCGCCTGCCGCCGAGCCGCCGTCG|GGCCCCGATGCAGCCGTCAACACCCACTGCGCTGAGCTATATGCTTCAGGCCCGGGCCCAGCAGCCTCACTCTGCGCCCCGGAGCGTCGCTGCTCCCCGCTTTG
Hic1	Del 1|0	43.5329	23.5705	58.1979	65.2824	82.8221	74.5913	80.6799	72.0597	79.8699	74.4883	71.2978	74.2903	72.1966	65.9564	CTACGCTCCTTACGGGCGGCCCGGCCGGGGCTTGAGGGCTGCCACGCCCGTCATCCAGGCTTGCTACTCGTCCCCGGCCGGGCCACCGCCGCCGCCTGCCGCCGAGCCGCCGTC-|GGCCCCGATGCAGCCGTCAACACCCACTGCGCTGAGCTATATGCTTCAGGCCCGGGCCCAGCAGCCTCACTCTGCGCCCCGGAGCGTCGCTGCTCCCCGCTTTG
Hic1	Del 0|3	0	5.14612	0	2.82392	1.13935	0	0	0	0	0	0	0	0	0	CTACGCTCCTTACGGGCGGCCCGGCCGGGGCTTGAGGGCTGCCACGCCCGTCATCCAGGCTTGCTACTCGTCCCCGGCCGGGCCACCGCCGCCGCCTGCCGCCGAGCCGCCGTCG|---CCCGATGCAGCCGTCAACACCCACTGCGCTGAGCTATATGCTTCAGGCCCGGGCCCAGCAGCCTCACTCTGCGCCCCGGAGCGTCGCTGCTCCCCGCTTTG
Hic1	Ins 1 G	0	0	0	0	0	21.2864	14.664	25.4967	16.9211	23.1601	18.7643	21.1754	22.4454	24.7277	CTACGCTCCTTACGGGCGGCCCGGCCGGGGCTTGAGGGCTGCCACGCCCGTCATCCAGGCTTGCTACTCGTCCCCGGCCGGGCCACCGCCGCCGCCTGCCGCCGAGCCGCCGTCG|{G}GGCCCCGATGCAGCCGTCAACACCCACTGCGCTGAGCTATATGCTTCAGGCCCGGGCCCAGCAGCCTCACTCTGCGCCCCGGAGCGTCGCTGCTCCCCGCTTTG
Hnf1a	WT	100	100	100	100	100	100	100	100	100	100	100	100	100	100	GCCCTACCTGATGGTTGGAGAGGGTCCCCTGGACAAGGGGGAGTCCTGCGGTGGGAGTCGAGGGGACCTGACCGAGTTGCCTAATGGCCTTGG|AGAAACGCGTGGCTCTGAAGATGACACGGATGACGATGGGGAAGACTTCGCGCCACCCATTCTGAAAGAGCTGGAGAACCTCAGCCCAGAGGAGGCAGCCCACCAGAAAGCCGTGGTGGAGTCA
Keap1	WT	73.4513	99.9233	99.9546	70.1852	13.9448	47.9738	0.529224	47.9551	47.3052	31.6371	47.8971	48.3529	36.7286	48.2695	CTTCTACGTGCAGGCACTGCTGCGGGCCGTGCGCTGCCATGCGCTCACGCCGCGCTTCCTGCAGACGCAGCTGCAGAAGTGTGAGATCCTGCAGGCCGACG|CGCGCTGCAAGGACTACCTGGTGCAGATATTCCAGGAGCTCACGCTGCACAAGCCCACGCAGGCAGTGCCCTGCCGCGCGCCCAAAGTGGGCCGCCTCATCTACACAGCGGGCGGTTACTTCCGACAGTCGCT
Keap1	Del 2|1	26.5487	0.0766545	0.045363	29.8148	86.0552	0	0	0	0	0	0	0	0	0	CTTCTACGTGCAGGCACTGCTGCGGGCCGTGCGCTGCCATGCGCTCACGCCGCGCTTCCTGCAGACGCAGCTGCAGAAGTGTGAGATCCTGCAGGCCGA--|-GCGCTGCAAGGACTACCTGGTGCAGATATTCCAGGAGCTCACGCTGCACAAGCCCACGCAGGCAGTGCCCTGCCGCGCGCCCAAAGTGGGCCGCCTCATCTACACAGCGGGCGGTTACTTCCGACAGTCGCT
Keap1	Del 8|9	0	0	0	0	0	52.0262	99.4708	52.0449	52.6948	68.3629	52.1029	51.6471	63.2714	51.7305	CTTCTACGTGCAGGCACTGCTGCGGGCCGTGCGCTGCCATGCGCTCACGCCGCGCTTCCTGCAGACGCAGCTGCAGAAGTGTGAGATCCTGCA--------|---------AGGACTACCTGGTGCAGATATTCCAGGAGCTCACGCTGCACAAGCCCACGCAGGCAGTGCCCTGCCGCGCGCCCAAAGTGGGCCGCCTCATCTACACAGCGGGCGGTTACTTCCGACAGTCGCT
Kmt2a	WT	8.44103	0.203472	0.187601	0.242018	0.143434	0	0	0	0	0	0	0	0	0	AGTTGCTGGCTCAGAAGATGCCGAGCCTCTTGCTCCTCCCATCAAACCAATTAAGCCTGTCACCAGAAACAAGGCACCTCAGGAGCCTCCGGTGAAGAAAGGGCGGCGATCA|AGGCGGTGCGGACAATGTCCTGGCTGCCAGGTGCCTGAGGACTGTGGCATTTGCACTAATTGCCTGGACAAGCCCAAGTTTGGTGGCCGCAATATA
Kmt2a	Del 6|0	32.7029	34.6834	34.7699	41.259	48.869	0	0	0	0	0	0	0	0	0	AGTTGCTGGCTCAGAAGATGCCGAGCCTCTTGCTCCTCCCATCAAACCAATTAAGCCTGTCACCAGAAACAAGGCACCTCAGGAGCCTCCGGTGAAGAAAGGGCGG------|AGGCGGTGCGGACAATGTCCTGGCTGCCAGGTGCCTGAGGACTGTGGCATTTGCACTAATTGCCTGGACAAGCCCAAGTTTGGTGGCCGCAATATA
Kmt2a	Del 20|2	20.8457	0.0502208	0.197222	22.6844	45.5446	0	0	0	0	0	0	0	0	0	AGTTGCTGGCTCAGAAGATGCCGAGCCTCTTGCTCCTCCCATCAAACCAATTAAGCCTGTCACCAGAAACAAGGCACCTCAGGAGCCTCCGG--------------------|--GCGGTGCGGACAATGTCCTGGCTGCCAGGTGCCTGAGGACTGTGGCATTTGCACTAATTGCCTGGACAAGCCCAAGTTTGGTGGCCGCAATATA
Kmt2a	Ins 1 A	17.5831	31.0303	30.9738	18.5565	2.91662	15.2793	28.3802	14.4215	14.0295	17.5827	14.7244	5.30851	4.83737	14.9984	AGTTGCTGGCTCAGAAGATGCCGAGCCTCTTGCTCCTCCCATCAAACCAATTAAGCCTGTCACCAGAAACAAGGCACCTCAGGAGCCTCCGGTGAAGAAAGGGCGGCGATCA{A}|AGGCGGTGCGGACAATGTCCTGGCTGCCAGGTGCCTGAGGACTGTGGCATTTGCACTAATTGCCTGGACAAGCCCAAGTTTGGTGGCCGCAATATA
Kmt2a	Del 7|0	12.4337	33.5646	33.4337	16.6565	2.17409	0	0	0	0	0	0	0	0	0	AGTTGCTGGCTCAGAAGATGCCGAGCCTCTTGCTCCTCCCATCAAACCAATTAAGCCTGTCACCAGAAACAAGGCACCTCAGGAGCCTCCGGTGAAGAAAGGGC-------A|AGGCGGTGCGGACAATGTCCTGGCTGCCAGGTGCCTGAGGACTGTGGCATTTGCACTAATTGCCTGGACAAGCCCAAGTTTGGTGGCCGCAATATA
Kmt2a	Del 4|0	7.99359	0.468037	0.437736	0.601529	0.352245	0	0	0	0	0	0	0	0	0	AGTTGCTGGCTCAGAAGATGCCGAGCCTCTTGCTCCTCCCATCAAACCAATTAAGCCTGTCACCAGAAACAAGGCACCTCAGGAGCCTCCGGTGAAGAAAGGGCGGCG----|AGGCGGTGCGGACAATGTCCTGGCTGCCAGGTGCCTGAGGACTGTGGCATTTGCACTAATTGCCTGGACAAGCCCAAGTTTGGTGGCCGCAATATA
Kmt2a	Del 3|0	0	0	0	0	0	17.1904	38.5371	16.2859	16.7517	19.9545	17.8713	19.6381	5.49125	16.8075	AGTTGCTGGCTCAGAAGATGCCGAGCCTCTTGCTCCTCCCATCAAACCAATTAAGCCTGTCACCAGAAACAAGGCACCTCAGGAGCCTCCGGTGAAGAAAGGGCGGCGA---|AGGCGGTGCGGACAATGTCCTGGCTGCCAGGTGCCTGAGGACTGTGGCATTTGCACTAATTGCCTGGACAAGCCCAAGTTTGGTGGCCGCAATATA
Kmt2a	Del 1|0	0	0	0	0	0	32.9992	0.135439	34.0982	34.2789	20.9916	33.8856	37.5883	33.5806	33.2311	AGTTGCTGGCTCAGAAGATGCCGAGCCTCTTGCTCCTCCCATCAAACCAATTAAGCCTGTCACCAGAAACAAGGCACCTCAGGAGCCTCCGGTGAAGAAAGGGCGGCGAT-A|AGGCGGTGCGGACAATGTCCTGGCTGCCAGGTGCCTGAGGACTGTGGCATTTGCACTAATTGCCTGGACAAGCCCAAGTTTGGTGGCCGCAATATA
Kmt2a	Del 3|0 Ins 2GA	0	0	0	0	0	34.5312	32.9473	35.1945	34.9399	41.4711	33.5187	37.4651	56.0907	34.963	AGTTGCTGGCTCAGAAGATGCCGAGCCTCTTGCTCCTCCCATCAAACCAATTAAGCCTGTCACCAGAAACAAGGCACCTCAGGAGCCTCCGGTGAAGAAAGGGCGGCGA---{GA}|AGGCGGTGCGGACAATGTCCTGGCTGCCAGGTGCCTGAGGACTGTGGCATTTGCACTAATTGCCTGGACAAGCCCAAGTTTGGTGGCCGCAATATA
Kmt2c	WT	58.834	59.9489	58.4084	40.4738	12.3003	28.6661	42.0744	29.2465	8.23229	58.5206	25.6515	42.2602	20.3699	31.6925	CTCATGCCAAACCAGGATCCTTTTTTGCAAGCAGCACAAAACCGAGTACCAGGTTTACCTGGCCCTTTGATAAGGCCACCTGATACATGCTCCCAGACTCCCAGGCCACCTGGGCCTGGC|CGTATAGACACATTCACTCATGCTTCCTCATCTGCTGTTCGTGATCCATATGATCAGCCTCCAGTGACTCCCAGGCCTCATTCTGAGTCTTTCG
Kmt2c	Del 43|35	20.8872	2.86192	4.02632	11.3991	20.9778	0	0	0	0	0	0	0	0	0	CTCATGCCAAACCAGGATCCTTTTTTGCAAGCAGCACAAAACCGAGTACCAGGTTTACCTGGCCCTTTGATAAGGCC------------------------------------------- | -------------------------CCTCATCTGCTGTTCGTGATCCATATGATCAGCCTCCAGTGACTCCCAGGCCTCATTCTGAGTCTTTCG
Kmt2c	Del 0|5	19.3736	1.35694	1.37772	8.92818	25.3985	0	0	0	0	0	0	0	0	0	CTCATGCCAAACCAGGATCCTTTTTTGCAAGCAGCACAAAACCGAGTACCAGGTTTACCTGGCCCTTTGATAAGGCCACCTGATACATGCTCCCAGACTCCCAGGCCACCTGGGCCTGGC|-----AGACACATTCACTCATGCTTCCTCATCTGCTGTTCGTGATCCATATGATCAGCCTCCAGTGACTCCCAGGCCTCATTCTGAGTCTTTCG
Kmt2c	Del 1|0	0.872742	13.03	13.2995	13.6159	13.4099	0	0	0	0	0	0	0	0	0	CTCATGCCAAACCAGGATCCTTTTTTGCAAGCAGCACAAAACCGAGTACCAGGTTTACCTGGCCCTTTGATAAGGCCACCTGATACATGCTCCCAGACTCCCAGGCCACCTGGGCCTGG-|CGTATAGACACATTCACTCATGCTTCCTCATCTGCTGTTCGTGATCCATATGATCAGCCTCCAGTGACTCCCAGGCCTCATTCTGAGTCTTTCG
Kmt2c	Del 0|2	0.0049871	10.1782	10.1923	10.9778	11.5599	0	0	0	0	0	0	0	0	0	CTCATGCCAAACCAGGATCCTTTTTTGCAAGCAGCACAAAACCGAGTACCAGGTTTACCTGGCCCTTTGATAAGGCCACCTGATACATGCTCCCAGACTCCCAGGCCACCTGGGCCTGGC|C--ATAGACACATTCACTCATGCTTCCTCATCTGCTGTTCGTGATCCATATGATCAGCCTCCAGTGACTCCCAGGCCTCATTCTGAGTCTTTCG
Kmt2c	Del 0|5	0.0174548	8.05867	8.10304	9.44737	10.844	0	0	0	0	0	0	0	0	0	CTCATGCCAAACCAGGATCCTTTTTTGCAAGCAGCACAAAACCGAGTACCAGGTTTACCTGGCCCTTTGATAAGGCCACCTGATACATGCTCCCAGACTCCCAGGCCACCTGGGCCTGGC|C-----GACACATTCACTCATGCTTCCTCATCTGCTGTTCGTGATCCATATGATCAGCCTCCAGTGACTCCCAGGCCTCATTCTGAGTCTTTCG
Kmt2c	Del 0|3	0.00997419	4.56539	4.59273	5.15793	5.50961	0	0	0	0	0	0	0	0	0	CTCATGCCAAACCAGGATCCTTTTTTGCAAGCAGCACAAAACCGAGTACCAGGTTTACCTGGCCCTTTGATAAGGCCACCTGATACATGCTCCCAGACTCCCAGGCCACCTGGGCCTGGC|---ATAGACACATTCACTCATGCTTCCTCATCTGCTGTTCGTGATCCATATGATCAGCCTCCAGTGACTCCCAGGCCTCATTCTGAGTCTTTCG
Kmt2c	Del 0|1	0	0	0	0	0	36.2314	0.475564	36.1762	52.1814	21.5831	37.2299	20.9029	34.9732	35.3968	CTCATGCCAAACCAGGATCCTTTTTTGCAAGCAGCACAAAACCGAGTACCAGGTTTACCTGGCCCTTTGATAAGGCCACCTGATACATGCTCCCAGACTCCCAGGCCACCTGGGCCTGGC|C-TATAGACACATTCACTCATGCTTCCTCATCTGCTGTTCGTGATCCATATGATCAGCCTCCAGTGACTCCCAGGCCTCATTCTGAGTCTTTCG
Kmt2c	Del 0|2	0	0	0	0	0	35.1025	57.45	34.5774	39.5863	19.8963	37.1186	36.8369	44.6569	32.9107	CTCATGCCAAACCAGGATCCTTTTTTGCAAGCAGCACAAAACCGAGTACCAGGTTTACCTGGCCCTTTGATAAGGCCACCTGATACATGCTCCCAGACTCCCAGGCCACCTGGGCCTGGC|--TATAGACACATTCACTCATGCTTCCTCATCTGCTGTTCGTGATCCATATGATCAGCCTCCAGTGACTCCCAGGCCTCATTCTGAGTCTTTCG
Lkb1	Del 10|0	32.8659	0.348808	0.376023	16.0598	32.6887	0	0	0	0	0	0	0	0	0	ATCGACTCCACCGAGGTAATCTACCAGCCGCGCCGCAAACGCGCCAAGCTCATCGGCAAGTACCTGATGGGGGACCTGCTCGGGGAG----------|GCAAGGTGAAGGAGGTGCTGGACTCCGAGACCTTATGCCGCAGGGCGGTCAAGATCCTCAAGAAGAAAAAGCTGCGCAGGATCCCCAATGGAGAGGCCAACGTCAAGAAGTA
Lkb1	Ins 1 G	21.2645	23.738	26.3382	11.8909	2.087	0	0	0	0	0	0	0	0	0	ATCGACTCCACCGAGGTAATCTACCAGCCGCGCCGCAAACGCGCCAAGCTCATCGGCAAGTACCTGATGGGGGACCTGCTCGGGGAGGGCTCGTACG{G}|GCAAGGTGAAGGAGGTGCTGGACTCCGAGACCTTATGCCGCAGGGCGGTCAAGATCCTCAAGAAGAAAAAGCTGCGCAGGATCCCCAATGGAGAGGCCAACGTCAAGAAGTA
Lkb1	Del 8|14	19.4982	0.298072	0.342845	13.3054	27.3465	0	0	0	0	0	0	0	0	0	ATCGACTCCACCGAGGTAATCTACCAGCCGCGCCGCAAACGCGCCAAGCTCATCGGCAAGTACCTGATGGGGGACCTGCTCGGGGAGGG-------- | --------------GTGCTGGACTCCGAGACCTTATGCCGCAGGGCGGTCAAGATCCTCAAGAAGAAAAAGCTGCGCAGGATCCCCAATGGAGAGGCCAACGTCAAGAAGTA
Lkb1	Del 1|0	13.8007	1.69964	1.43774	11.4916	1.04917	40.4245	33.9664	40.1309	40.4488	40.7085	39.4429	41.0958	46.9576	41.0609	ATCGACTCCACCGAGGTAATCTACCAGCCGCGCCGCAAACGCGCCAAGCTCATCGGCAAGTACCTGATGGGGGACCTGCTCGGGGAGGGCTCGTAC-|GCAAGGTGAAGGAGGTGCTGGACTCCGAGACCTTATGCCGCAGGGCGGTCAAGATCCTCAAGAAGAAAAAGCTGCGCAGGATCCCCAATGGAGAGGCCAACGTCAAGAAGTA
Lkb1	Del 5|2	12.428	25.4503	27.046	12.5203	2.46129	0	0	0	0	0	0	0	0	0	ATCGACTCCACCGAGGTAATCTACCAGCCGCGCCGCAAACGCGCCAAGCTCATCGGCAAGTACCTGATGGGGGACCTGCTCGGGGAGGGCTC----- | --AAGGTGAAGGAGGTGCTGGACTCCGAGACCTTATGCCGCAGGGCGGTCAAGATCCTCAAGAAGAAAAAGCTGCGCAGGATCCCCAATGGAGAGGCCAACGTCAAGAAGTA
Lkb1	Del 4|0	0.0787208	27.9871	25.2765	20.2829	19.3501	39.1115	32.9903	39.4313	39.0338	38.8254	39.5239	37.6697	34.8421	38.5415	ATCGACTCCACCGAGGTAATCTACCAGCCGCGCCGCAAACGCGCCAAGCTCATCGGCAAGTACCTGATGGGGGACCTGCTCGGGGAGGGCTCG----|GCAAGGTGAAGGAGGTGCTGGACTCCGAGACCTTATGCCGCAGGGCGGTCAAGATCCTCAAGAAGAAAAAGCTGCGCAGGATCCCCAATGGAGAGGCCAACGTCAAGAAGTA
Lkb1	Del 2|0	0.00492005	13.3054	12.1157	9.04846	9.48789	0	0	0	0	0	0	0	0	0	ATCGACTCCACCGAGGTAATCTACCAGCCGCGCCGCAAACGCGCCAAGCTCATCGGCAAGTACCTGATGGGGGACCTGCTCGGGGAGGGCTCGT--G|GCAAGGTGAAGGAGGTGCTGGACTCCGAGACCTTATGCCGCAGGGCGGTCAAGATCCTCAAGAAGAAAAAGCTGCGCAGGATCCCCAATGGAGAGGCCAACGTCAAGAAGTA
Lkb1	Del 2|0	0.0590406	7.17275	7.06702	5.40065	5.52941	0	0	0	0	0	0	0	0	0	ATCGACTCCACCGAGGTAATCTACCAGCCGCGCCGCAAACGCGCCAAGCTCATCGGCAAGTACCTGATGGGGGACCTGCTCGGGGAGGGCTCGTA--|GCAAGGTGAAGGAGGTGCTGGACTCCGAGACCTTATGCCGCAGGGCGGTCAAGATCCTCAAGAAGAAAAAGCTGCGCAGGATCCCCAATGGAGAGGCCAACGTCAAGAAGTA
Lkb1	Del 1|0	0	0	0	0	0	20.4639	33.0432	20.4378	20.5174	20.4661	21.0332	21.2344	18.2004	20.3976	ATCGACTCCACCGAGGTAATCTACCAGCCGCGCCGCAAACGCGCCAAGCTCATCGGCAAGTACCTGATGGGGGACCTGCTCGGGGAGGGCTCGTA-G|GCAAGGTGAAGGAGGTGCTGGACTCCGAGACCTTATGCCGCAGGGCGGTCAAGATCCTCAAGAAGAAAAAGCTGCGCAGGATCCCCAATGGAGAGGCCAACGTCAAGAAGTA
Mlh1	WT	5.43296	0.745092	0.538622	0.85509	0.725514	0	0	0	0	0	0	0	0	0	ATGTGCTAAAACCTGGCCTTTTTTACTCTTTTCTCTCTTGAAACAGACCTTGCTTCCAGGACTTGCTGGGCCTTCTGGGGAGGCAGCTAGACCCACGA|CAGGGGTGGCTTCCTCATCCACTAGTGGAAGTGGCGACAAGGTCTACGCTTACCAGATGGTCCGTACGGACTCCCGGGAGCAGAAGCTTGACGCCTTTCTGCAGCCTGTAAG
Mlh1	Del 18|5	21.4703	0.451354	0.306035	4.07532	10.2425	0	0	0	0	0	0	0	0	0	ATGTGCTAAAACCTGGCCTTTTTTACTCTTTTCTCTCTTGAAACAGACCTTGCTTCCAGGACTTGCTGGGCCTTCT------------------ | -----GTGGCTTCCTCATCCACTAGTGGAAGTGGCGACAAGGTCTACGCTTACCAGATGGTCCGTACGGACTCCCGGGAGCAGAAGCTTGACGCCTTTCTGCAGCCTGTAAG
Mlh1	Del 28|5	20.5312	0.49434	0.532501	4.30274	11.3024	0	0	0	0	0	0	0	0	0	ATGTGCTAAAACCTGGCCTTTTTTACTCTTTTCTCTCTTGAAACAGACCTTGCTTCCAGGACTTGCTGGG---------------------------- | -----GTGGCTTCCTCATCCACTAGTGGAAGTGGCGACAAGGTCTACGCTTACCAGATGGTCCGTACGGACTCCCGGGAGCAGAAGCTTGACGCCTTTCTGCAGCCTGTAAG
Mlh1	Del 2|0	17.03	10.6319	8.96071	6.75885	3.10833	0	0	0	0	0	0	0	0	0	ATGTGCTAAAACCTGGCCTTTTTTACTCTTTTCTCTCTTGAAACAGACCTTGCTTCCAGGACTTGCTGGGCCTTCTGGGGAGGCAGCTAGACCCAC--|CAGGGGTGGCTTCCTCATCCACTAGTGGAAGTGGCGACAAGGTCTACGCTTACCAGATGGTCCGTACGGACTCCCGGGAGCAGAAGCTTGACGCCTTTCTGCAGCCTGTAAG
Mlh1	Del 8|0	13.7635	6.72016	5.6188	4.00255	1.44391	0	0	0	0	0	0	0	0	0	ATGTGCTAAAACCTGGCCTTTTTTACTCTTTTCTCTCTTGAAACAGACCTTGCTTCCAGGACTTGCTGGGCCTTCTGGGGAGGCAGCTAG--------|CAGGGGTGGCTTCCTCATCCACTAGTGGAAGTGGCGACAAGGTCTACGCTTACCAGATGGTCCGTACGGACTCCCGGGAGCAGAAGCTTGACGCCTTTCTGCAGCCTGTAAG
Mlh1	Del 1|3	13.5153	7.94526	7.25915	4.26635	25.7344	0	0	0	0	0	0	0	0	0	ATGTGCTAAAACCTGGCCTTTTTTACTCTTTTCTCTCTTGAAACAGACCTTGCTTCCAGGACTTGCTGGGCCTTCTGGGGAGGCAGCTAGACCCACG-|---GGGTGGCTTCCTCATCCACTAGTGGAAGTGGCGACAAGGTCTACGCTTACCAGATGGTCCGTACGGACTCCCGGGAGCAGAAGCTTGACGCCTTTCTGCAGCCTGTAAG
Mlh1	Ins 1 A	7.63297	1.93437	1.97699	1.98308	2.07696	0	0	0	0	0	0	0	0	0	ATGTGCTAAAACCTGGCCTTTTTTACTCTTTTCTCTCTTGAAACAGACCTTGCTTCCAGGACTTGCTGGGCCTTCTGGGGAGGCAGCTAGACCCACGA{A}|CAGGGGTGGCTTCCTCATCCACTAGTGGAAGTGGCGACAAGGTCTACGCTTACCAGATGGTCCGTACGGACTCCCGGGAGCAGAAGCTTGACGCCTTTCTGCAGCCTGTAAG
Mlh1	Del 4|0	0.0603662	26.3075	29.7588	27.5357	1.77822	0	0	0	0	0	0	0	0	0	ATGTGCTAAAACCTGGCCTTTTTTACTCTTTTCTCTCTTGAAACAGACCTTGCTTCCAGGACTTGCTGGGCCTTCTGGGGAGGCAGCTAGACCC----|CAGGGGTGGCTTCCTCATCCACTAGTGGAAGTGGCGACAAGGTCTACGCTTACCAGATGGTCCGTACGGACTCCCGGGAGCAGAAGCTTGACGCCTTTCTGCAGCCTGTAAG
Mlh1	Del 1|0	0.114025	25.5839	29.0305	27.09	25.4855	0	0	0	0	0	0	0	0	0	ATGTGCTAAAACCTGGCCTTTTTTACTCTTTTCTCTCTTGAAACAGACCTTGCTTCCAGGACTTGCTGGGCCTTCTGGGGAGGCAGCTAGACCCACG-|CAGGGGTGGCTTCCTCATCCACTAGTGGAAGTGGCGACAAGGTCTACGCTTACCAGATGGTCCGTACGGACTCCCGGGAGCAGAAGCTTGACGCCTTTCTGCAGCCTGTAAG
Mlh1	Del 5|0	0.449393	19.1861	16.0179	19.1304	18.1023	0	0	0	0	0	0	0	0	0	ATGTGCTAAAACCTGGCCTTTTTTACTCTTTTCTCTCTTGAAACAGACCTTGCTTCCAGGACTTGCTGGGCCTTCTGGGGAGGCAGCTAGACC-----|CAGGGGTGGCTTCCTCATCCACTAGTGGAAGTGGCGACAAGGTCTACGCTTACCAGATGGTCCGTACGGACTCCCGGGAGCAGAAGCTTGACGCCTTTCTGCAGCCTGTAAG
Mlh1	Del 3|0	0	0	0	0	0	52.614	99.5757	51.1904	54.2287	68.3338	54.8003	51.0615	63.2047	51.4832	ATGTGCTAAAACCTGGCCTTTTTTACTCTTTTCTCTCTTGAAACAGACCTTGCTTCCAGGACTTGCTGGGCCTTCTGGGGAGGCAGCTAGACCCA---|CAGGGGTGGCTTCCTCATCCACTAGTGGAAGTGGCGACAAGGTCTACGCTTACCAGATGGTCCGTACGGACTCCCGGGAGCAGAAGCTTGACGCCTTTCTGCAGCCTGTAAG
Mlh1	Del 0|1	0	0	0	0	0	47.386	0.424348	48.8096	45.7713	31.6662	45.1997	48.9385	36.7953	48.5168	ATGTGCTAAAACCTGGCCTTTTTTACTCTTTTCTCTCTTGAAACAGACCTTGCTTCCAGGACTTGCTGGGCCTTCTGGGGAGGCAGCTAGACCCACGA|CA-GGGTGGCTTCCTCATCCACTAGTGGAAGTGGCGACAAGGTCTACGCTTACCAGATGGTCCGTACGGACTCCCGGGAGCAGAAGCTTGACGCCTTTCTGCAGCCTGTAAG
Mst1	WT	5.31814	1.56514	1.35062	1.29088	1.56991	0	0	0	0	0	0	0	0	0	TGGGGTCAATCAAGCCTAAGGAGGGAGTGATAGGCCTGCCCCCACTTAGAAGTGCATTGGCCCTGTTTCCAGCTGTTTGTGTTCTGTGCAACGGTGAGGATTA|CCGTGGCGAGGTAGACGTTACAGAGTCAGGGCGGGAGTGTCAACGCTGGGACCTGCAGCACCCCCACTCGCACCCTTTCCAGCCTGAAAAGTATGTAGGCA
Mst1	Del 1|0	61.1349	65.0804	62.2636	59.9398	60.8412	50.4279	31.2864	50.6013	49.7013	40.588	49.0791	43.085	39.7986	0	TGGGGTCAATCAAGCCTAAGGAGGGAGTGATAGGCCTGCCCCCACTTAGAAGTGCATTGGCCCTGTTTCCAGCTGTTTGTGTTCTGTGCAACGGTGAGGATT-|CCGTGGCGAGGTAGACGTTACAGAGTCAGGGCGGGAGTGTCAACGCTGGGACCTGCAGCACCCCCACTCGCACCCTTTCCAGCCTGAAAAGTATGTAGGCA
Mst1	Del 31|23	19.1595	1.14213	1.80983	7.27194	15.7879	0	0	0	0	0	0	0	0	0	TGGGGTCAATCAAGCCTAAGGAGGGAGTGATAGGCCTGCCCCCACTTAGAAGTGCATTGGCCCTGTTTCCAG------------------------------- | -----------------------AGTCAGGGCGGGAGTGTCAACGCTGGGACCTGCAGCACCCCCACTCGCACCCTTTCCAGCCTGAAAAGTATGTAGGCA
Mst1	Del 3|0	14.0788	11.1675	11.1561	6.19621	1.51066	0	0	0	0	0	0	0	0	0	TGGGGTCAATCAAGCCTAAGGAGGGAGTGATAGGCCTGCCCCCACTTAGAAGTGCATTGGCCCTGTTTCCAGCTGTTTGTGTTCTGTGCAACGGTGAGGA---|CCGTGGCGAGGTAGACGTTACAGAGTCAGGGCGGGAGTGTCAACGCTGGGACCTGCAGCACCCCCACTCGCACCCTTTCCAGCCTGAAAAGTATGTAGGCA
Mst1	Del 7|0	0.308642	21.0448	23.4198	25.3012	20.2903	0	0	0	0	0	0	0	0	0	TGGGGTCAATCAAGCCTAAGGAGGGAGTGATAGGCCTGCCCCCACTTAGAAGTGCATTGGCCCTGTTTCCAGCTGTTTGTGTTCTGTGCAACGGT-------A|CCGTGGCGAGGTAGACGTTACAGAGTCAGGGCGGGAGTGTCAACGCTGGGACCTGCAGCACCCCCACTCGCACCCTTTCCAGCCTGAAAAGTATGTAGGCA
Mst1	Ins 1A	0	0	0	0	0	33.5637	29.878	33.2993	34.2679	40.2824	33.1891	37.2554	56.6725	70.3031	TGGGGTCAATCAAGCCTAAGGAGGGAGTGATAGGCCTGCCCCCACTTAGAAGTGCATTGGCCCTGTTTCCAGCTGTTTGTGTTCTGTGCAACGGTGAGGATTA{A}|CCGTGGCGAGGTAGACGTTACAGAGTCAGGGCGGGAGTGTCAACGCTGGGACCTGCAGCACCCCCACTCGCACCCTTTCCAGCCTGAAAAGTATGTAGGCA
Mst1	Del 5|1	0	0	0	0	0	16.0083	38.8355	16.0994	16.0309	19.1296	17.7319	19.6596	3.5289	29.6969	TGGGGTCAATCAAGCCTAAGGAGGGAGTGATAGGCCTGCCCCCACTTAGAAGTGCATTGGCCCTGTTTCCAGCTGTTTGTGTTCTGTGCAACGGTGAG-----|-CGTGGCGAGGTAGACGTTACAGAGTCAGGGCGGGAGTGTCAACGCTGGGACCTGCAGCACCCCCACTCGCACCCTTTCCAGCCTGAAAAGTATGTAGGCA
Msx1	WT	60.0485	98.9151	97.6404	69.3504	11.5814	34.015	1.43794	33.8948	57.1464	34.0505	32.0704	19.4493	32.92	32.1041	TCATGGCCGATCACAGGAAGCCCGGGGCCAAGGAGAGCGTCCTGGTGGCCTCCGAAGGGGCTCAGGCAGCGGGTGGCTCGGTGCAGCACTTGGGCACCCGGCCCGGGT|CTCTGGGCGCCCCGGATGCGCCCTCCTCGCCGCGGCCTCTCGGCCATTTCTCAGTCGGAGGACTCCTCAAGCTGCCAGAAGATGCTCTGGTGAAGGCCGAAAGCCCCGAGAAACTAGA
Msx1	Del 0|2	25.0092	1.03128	2.25313	17.2113	47.9184	31.204	40.7339	31.5749	1.27198	31.5905	28.1229	41.7935	21.6721	33.6538	TCATGGCCGATCACAGGAAGCCCGGGGCCAAGGAGAGCGTCCTGGTGGCCTCCGAAGGGGCTCAGGCAGCGGGTGGCTCGGTGCAGCACTTGGGCACCCGGCCCGGGT|--CTGGGCGCCCCGGATGCGCCCTCCTCGCCGCGGCCTCTCGGCCATTTCTCAGTCGGAGGACTCCTCAAGCTGCCAGAAGATGCTCTGGTGAAGGCCGAAAGCCCCGAGAAACTAGA
Msx1	Del 19|22	14.9423	0.0536406	0.106517	13.4383	40.5003	0	0	0	0	0	0	0	0	0	TCATGGCCGATCACAGGAAGCCCGGGGCCAAGGAGAGCGTCCTGGTGGCCTCCGAAGGGGCTCAGGCAGCGGGTGGCTCGGTGCAGCAC------------------- | ----------------------CTCCTCGCCGCGGCCTCTCGGCCATTTCTCAGTCGGAGGACTCCTCAAGCTGCCAGAAGATGCTCTGGTGAAGGCCGAAAGCCCCGAGAAACTAGA
Msx1	Del 0|3	0	0	0	0	0	34.781	57.8282	34.5303	41.5816	34.359	39.8068	38.7573	45.4079	34.2421	TCATGGCCGATCACAGGAAGCCCGGGGCCAAGGAGAGCGTCCTGGTGGCCTCCGAAGGGGCTCAGGCAGCGGGTGGCTCGGTGCAGCACTTGGGCACCCGGCCCGGGT|---TGGGCGCCCCGGATGCGCCCTCCTCGCCGCGGCCTCTCGGCCATTTCTCAGTCGGAGGACTCCTCAAGCTGCCAGAAGATGCTCTGGTGAAGGCCGAAAGCCCCGAGAAACTAGA
Nf1	WT	85.4532	41.9081	42.9356	38.8422	37.5814	70.1011	75.9617	65.5146	69.7864	65.2174	69.0579	69.9072	62.2877	65.8478	GACTGTGTGGAGGGATTATGTTTTAAATGTAGGATGTGTGGCTGTGGCTATTGGCCTGACTGTGTGTTTCTTTAGGTGTATGGTGCTACTTACCTACAAAAGCTCTTGGACCCTTT|ATTACGAGTCATCATCACATCTTCGGATTGGCAACATGTTAGCTTTGAAGTGGATCCTACCAGGTTTGTCATCTTGTCACAGTTGCTCCCTCACTC
Nf1	Del 22|13	14.4759	0.017262	0.0297079	1.39255	5.19507	0.019073	0	0.00235427	0.0116734	0	0	0	0	0	GACTGTGTGGAGGGATTATGTTTTAAATGTAGGATGTGTGGCTGTGGCTATTGGCCTGACTGTGTGTTTCTTTAGGTGTATGGTGCTACTTACC----------------------|-------------ATCATCACATCTTCGGATTGGCAACATGTTAGCTTTGAAGTGGATCCTACCAGGTTTGTCATCTTGTCACAGTTGCTCCCTCACTC
Nf1	Ins 1 A	0.0535253	36.4254	35.8156	37.2672	36.048	0	0	0	0	0	0	0	0	0	GACTGTGTGGAGGGATTATGTTTTAAATGTAGGATGTGTGGCTGTGGCTATTGGCCTGACTGTGTGTTTCTTTAGGTGTATGGTGCTACTTACCTACAAAAGCTCTTGGACCCTTT|{A}ATTACGAGTCATCATCACATCTTCGGATTGGCAACATGTTAGCTTTGAAGTGGATCCTACCAGGTTTGTCATCTTGTCACAGTTGCTCCCTCACTC
Nf1	Del 0|2	0.0120432	14.7404	14.4589	15.2435	14.2061	0	0	0	0	0	0	0	0	0	GACTGTGTGGAGGGATTATGTTTTAAATGTAGGATGTGTGGCTGTGGCTATTGGCCTGACTGTGTGTTTCTTTAGGTGTATGGTGCTACTTACCTACAAAAGCTCTTGGACCCTTT|--TACGAGTCATCATCACATCTTCGGATTGGCAACATGTTAGCTTTGAAGTGGATCCTACCAGGTTTGTCATCTTGTCACAGTTGCTCCCTCACTC
Nf1	Del 0|3	0.00535253	6.90878	6.76019	7.25456	6.96942	0	0	0	0	0	0	0	0	0	GACTGTGTGGAGGGATTATGTTTTAAATGTAGGATGTGTGGCTGTGGCTATTGGCCTGACTGTGTGTTTCTTTAGGTGTATGGTGCTACTTACCTACAAAAGCTCTTGGACCCTTT|---ACGAGTCATCATCACATCTTCGGATTGGCAACATGTTAGCTTTGAAGTGGATCCTACCAGGTTTGTCATCTTGTCACAGTTGCTCCCTCACTC
Nf1	Del 2|3	0	0	0	0	0	29.8798	24.0383	34.483	30.2019	34.7826	30.9421	30.0928	37.7123	34.1522	GACTGTGTGGAGGGATTATGTTTTAAATGTAGGATGTGTGGCTGTGGCTATTGGCCTGACTGTGTGTTTCTTTAGGTGTATGGTGCTACTTACCTACAAAAGCTCTTGGACCCT--|---ACGAGTCATCATCACATCTTCGGATTGGCAACATGTTAGCTTTGAAGTGGATCCTACCAGGTTTGTCATCTTGTCACAGTTGCTCCCTCACTC
Notch3	WT	77.838	60.4248	67.0214	47.5544	35.2129	0	0	0	0	0	0	0	0	0	CATACGCTGTGAGAGCCAGGTGGATGAGTGCCGCAGCCAGCCCTGTCGATATGGGGGCAAATGTCTAGACTTGGTGGACAAGTACCTCTGCCGTTGTCC|TCCCGGAACCACAGGTGGGGCCTGGGGCTGGGCTATAACAGTACGTGGGGGTGTGTGGGGGTCTGTGATGAATTTGTAACTGGTGCTTGACAATAGTAGGTACTCTTGCCATACTTCTTCCCTCCCT
Notch3	Del 0|2	18.3798	0.0519481	0.0553243	10.4035	25.9148	0	0	0	0	0	0	0	0	0	CATACGCTGTGAGAGCCAGGTGGATGAGTGCCGCAGCCAGCCCTGTCGATATGGGGGCAAATGTCTAGACTTGGTGGACAAGTACCTCTGCCGTTGTCC|--CCGGAACCACAGGTGGGGCCTGGGGCTGGGCTATAACAGTACGTGGGGGTGTGTGGGGGTCTGTGATGAATTTGTAACTGGTGCTTGACAATAGTAGGTACTCTTGCCATACTTCTTCCCTCCCT
Notch3	Del 1|0	0.352221	23.8564	19.6191	24.973	23.315	75.8605	73.6667	74.9177	74.6051	74.6621	75.127	74.8047	74.1446	74.7203	CATACGCTGTGAGAGCCAGGTGGATGAGTGCCGCAGCCAGCCCTGTCGATATGGGGGCAAATGTCTAGACTTGGTGGACAAGTACCTCTGCCGTTGTC-|TCCCGGAACCACAGGTGGGGCCTGGGGCTGGGCTATAACAGTACGTGGGGGTGTGTGGGGGTCTGTGATGAATTTGTAACTGGTGCTTGACAATAGTAGGTACTCTTGCCATACTTCTTCCCTCCCT
Notch3	Del 3|0	0	9.61345	8.02202	10.6812	9.43167	0	0	0	0	0	0	0	0	0	CATACGCTGTGAGAGCCAGGTGGATGAGTGCCGCAGCCAGCCCTGTCGATATGGGGGCAAATGTCTAGACTTGGTGGACAAGTACCTCTGCCGTT---C|TCCCGGAACCACAGGTGGGGCCTGGGGCTGGGCTATAACAGTACGTGGGGGTGTGTGGGGGTCTGTGATGAATTTGTAACTGGTGCTTGACAATAGTAGGTACTCTTGCCATACTTCTTCCCTCCCT
Notch3	Del 0|1	3.42996	6.05348	5.28215	6.3879	6.12554	24.1395	26.3333	25.0823	25.3949	25.3379	24.873	25.1953	25.8554	25.2797	CATACGCTGTGAGAGCCAGGTGGATGAGTGCCGCAGCCAGCCCTGTCGATATGGGGGCAAATGTCTAGACTTGGTGGACAAGTACCTCTGCCGTTGTCC|-CCCGGAACCACAGGTGGGGCCTGGGGCTGGGCTATAACAGTACGTGGGGGTGTGTGGGGGTCTGTGATGAATTTGTAACTGGTGCTTGACAATAGTAGGTACTCTTGCCATACTTCTTCCCTCCCT
P53	WT	5.6481	1.91054	1.98957	1.94609	1.94464	0	0	0	0	0	0	0	0	0	AGCCATAGGGGTTTGTTTGTTTGTATGTTTTTTAATTGACAAGTTATGCATCCATACAGTACACAATCTCTTCTCTCTACAGATGACTGCCATGGAGGAGTCACAGTCGGATATCAGCCTCGAGCTCCCTCTGA|GCCAGGAGACATTTTCAGGCTTATGGAAACTGTGAGTGGATCTTTTTGGGGCCCTTAAGATACATCCCGCCATACCTGTATCCTCCCCTTGCCTGAGAGAA
P53	Del 1|0	29.8226	61.8653	61.5739	62.3696	61.7366	42.0273	50.3758	32.8227	43.5869	32.7276	44.5869	42.012	36.3164	35.6958	AGCCATAGGGGTTTGTTTGTTTGTATGTTTTTTAATTGACAAGTTATGCATCCATACAGTACACAATCTCTTCTCTCTACAGATGACTGCCATGGAGGAGTCACAGTCGGATATCAGCCTCGAGCTCCCTCTG-|GCCAGGAGACATTTTCAGGCTTATGGAAACTGTGAGTGGATCTTTTTGGGGCCCTTAAGATACATCCCGCCATACCTGTATCCTCCCCTTGCCTGAGAGAA
P53	Del 11|0	26.916	0.183959	0.175917	0.352192	0.546458	0	0	0	0	0	0	0	0	0	AGCCATAGGGGTTTGTTTGTTTGTATGTTTTTTAATTGACAAGTTATGCATCCATACAGTACACAATCTCTTCTCTCTACAGATGACTGCCATGGAGGAGTCACAGTCGGATATCAGCCTCGA-----------|GCCAGGAGACATTTTCAGGCTTATGGAAACTGTGAGTGGATCTTTTTGGGGCCCTTAAGATACATCCCGCCATACCTGTATCCTCCCCTTGCCTGAGAGAA
P53	Del 0|5	23.2162	0.149795	0.13077	0.264144	0.452241	0	0	0	0	0	0	0	0	0	AGCCATAGGGGTTTGTTTGTTTGTATGTTTTTTAATTGACAAGTTATGCATCCATACAGTACACAATCTCTTCTCTCTACAGATGACTGCCATGGAGGAGTCACAGTCGGATATCAGCCTCGAGCTCCCTCTGA|-----GAGACATTTTCAGGCTTATGGAAACTGTGAGTGGATCTTTTTGGGGCCCTTAAGATACATCCCGCCATACCTGTATCCTCCCCTTGCCTGAGAGAA
P53	Ins 1 A	14.3971	35.8904	36.1298	35.068	35.3201	57.9727	49.6242	67.1773	56.4131	67.2724	55.4131	57.988	63.6836	64.3042	AGCCATAGGGGTTTGTTTGTTTGTATGTTTTTTAATTGACAAGTTATGCATCCATACAGTACACAATCTCTTCTCTCTACAGATGACTGCCATGGAGGAGTCACAGTCGGATATCAGCCTCGAGCTCCCTCTGA{T}|GCCAGGAGACATTTTCAGGCTTATGGAAACTGTGAGTGGATCTTTTTGGGGCCCTTAAGATACATCCCGCCATACCTGTATCCTCCCCTTGCCTGAGAGAA
Pik3r1	WT	24.7993	95.821	95.9158	96.8351	96.9078	67.914	67.2548	67.2641	68.6237	60.0236	67.2168	67.9828	58.9309	62.1554	AGTGTGTGGTTACTCAAAGTTGAAAAGTAAGTATGGTCTTATACTGTGTTCATTTTAGGGAAGAAGTGAATGAAAAACTCCGAGACACTGCTGATGGGACCTTTT|TGGTACGAGACGCATCTACTAAAATGCACGGCGATTACACTCTTACACTAAGGTGAGCCAGGAAGTCAGCTGTAATTGCGATGTCTCAGTTGTCATGA
Pik3r1	Ins 1 T	40.834	2.50989	2.54019	1.50484	1.10975	32.086	32.7452	32.7359	31.3763	39.9764	32.7832	32.0172	41.0691	37.8446	AGTGTGTGGTTACTCAAAGTTGAAAAGTAAGTATGGTCTTATACTGTGTTCATTTTAGGGAAGAAGTGAATGAAAAACTCCGAGACACTGCTGATGGGACCTTTT|{T}TGGTACGAGACGCATCTACTAAAATGCACGGCGATTACACTCTTACACTAAGGTGAGCCAGGAAGTCAGCTGTAATTGCGATGTCTCAGTTGTCATGA
Pik3r1	Del 3|0	19.8204	0.0648419	0.0720668	0.346021	0.956533	0	0	0	0	0	0	0	0	0	AGTGTGTGGTTACTCAAAGTTGAAAAGTAAGTATGGTCTTATACTGTGTTCATTTTAGGGAAGAAGTGAATGAAAAACTCCGAGACACTGCTGATGGGACCT---|TGGTACGAGACGCATCTACTAAAATGCACGGCGATTACACTCTTACACTAAGGTGAGCCAGGAAGTCAGCTGTAATTGCGATGTCTCAGTTGTCATGA
Pik3r1	Del 1|0	14.5462	1.60429	1.47195	1.31407	1.02594	0	0	0	0	0	0	0	0	0	AGTGTGTGGTTACTCAAAGTTGAAAAGTAAGTATGGTCTTATACTGTGTTCATTTTAGGGAAGAAGTGAATGAAAAACTCCGAGACACTGCTGATGGGACCTTT-|TGGTACGAGACGCATCTACTAAAATGCACGGCGATTACACTCTTACACTAAGGTGAGCCAGGAAGTCAGCTGTAATTGCGATGTCTCAGTTGTCATGA
Pten	Del 4|0	33.8901	54.9498	71.1159	35.4398	5.91266	25.151	20.0095	18.8398	23.7447	24.6661	24.8976	26.2828	22.8919	26.412	CTTTTGTCTCCCTCCTCCCTCTGCCCCCTGGGCCTATCAGGGAGTCACAATTCCCAGTCAGAGGCGCTATGTATATTATTATAGCTACCTGCTAAAAAATCACCTGGATTAC----|CCGTGGCACTGCTGTTTCACAAGATGATGTTTGAAACTATTCCAATGTTCAGTGGCGGAACTTGCAGTAAGTGCTCTAAATTCTTAGCTGTCTGTGTGTCGGA
Pten	Del 1|0	24.2218	44.932	28.6386	29.1203	7.74043	50.7442	61.8757	55.8394	50.9638	50.8204	48.9873	46.9416	54.1037	49.9146	CTTTTGTCTCCCTCCTCCCTCTGCCCCCTGGGCCTATCAGGGAGTCACAATTCCCAGTCAGAGGCGCTATGTATATTATTATAGCTACCTGCTAAAAAATCACCTGGATTACAGA-|CCGTGGCACTGCTGTTTCACAAGATGATGTTTGAAACTATTCCAATGTTCAGTGGCGGAACTTGCAGTAAGTGCTCTAAATTCTTAGCTGTCTGTGTGTCGGA
Pten	Del 44|15	22.3398	0.0886525	0.173877	21.3025	52.0854	0	0	0	0	0	0	0	0	0	CTTTTGTCTCCCTCCTCCCTCTGCCCCCTGGGCCTATCAGGGAGTCACAATTCCCAGTCAGAGGCGCTATGT-------------------------------------------- | ---------------TTCACAAGATGATGTTTGAAACTATTCCAATGTTCAGTGGCGGAACTTGCAGTAAGTGCTCTAAATTCTTAGCTGTCTGTGTGTCGGA
Pten	Del 1|0	19.5483	0.0295508	0.0715966	14.1374	34.2615	0	0	0	0	0	0	0	0	0	CTTTTGTCTCCCTCCTCCCTCTGCCCCCTGGGCCTATCAGGGAGTCACAATTCCCAGTCAGAGGCGCTATGTATATTATTATAGCTACCTGCTAAAAAATCACCTGGATTACAG-C|CCGTGGCACTGCTGTTTCACAAGATGATGTTTGAAACTATTCCAATGTTCAGTGGCGGAACTTGCAGTAAGTGCTCTAAATTCTTAGCTGTCTGTGTGTCGGA
Pten	Del 9|0	0	0	0	0	0	24.1048	18.1149	25.3208	25.2915	24.5135	26.1151	26.7756	23.0044	23.6735	CTTTTGTCTCCCTCCTCCCTCTGCCCCCTGGGCCTATCAGGGAGTCACAATTCCCAGTCAGAGGCGCTATGTATATTATTATAGCTACCTGCTAAAAAATCACCTGG--------- | -CGTGGCACTGCTGTTTCACAAGATGATGTTTGAAACTATTCCAATGTTCAGTGGCGGAACTTGCAGTAAGTGCTCTAAATTCTTAGCTGTCTGTGTGTCGGA
Rasa1	Del 1|0	69.9934	66.3814	70.3115	79.9818	48.8721	64.5204	64.2359	62.0531	64.4585	77.9471	65.0932	65.5766	73.3638	78.7791	AGCGTGCCGGGTCAAGTTACCCGCGGCCCTGCCGGTGGCAGCCGCCCCGTGTCCCGGGCTGGCGGACGCCGACT|TGGTTGCGGCCCTCGGTGGCGGAGCCGCGTCGGGGTCCGGGTTCCTGGGGACCGGGCCGGTGGCCGGTGTCTTGGGGGGCGCCGCGCTGACCGGCAGTGCTGCTG
Rasa1	Ins 1 A	18.4402	33.4263	29.5818	0.0961898	3.14836	0	0	0	0	0	0	0	0	0	AGCGTGCCGGGTCAAGTTACCCGCGGCCCTGCCGGTGGCAGCCGCCCCGTGTCCCGGGCTGGCGGACGCCGACT|{A}TGGTTGCGGCCCTCGGTGGCGGAGCCGCGTCGGGGTCCGGGTTCCTGGGGACCGGGCCGGTGGCCGGTGTCTTGGGGGGCGCCGCGCTGACCGGCAGTGCTGCTG
Rasa1	Del 12|22	11.5664	0.1923	0.106721	19.922	47.9795	0	0	0	0	0	0	0	0	0	AGCGTGCCGGGTCAAGTTACCCGCGGCCCTGCCGGTGGCAGCCGCCCCGTGTCCCGGGCTGG------------|----------------------AGCCGCGTCGGGGTCCGGGTTCCTGGGGACCGGGCCGGTGGCCGGTGTCTTGGGGGGCGCCGCGCTGACCGGCAGTGCTGCTG
Rasa1	Del 0|3	0	0	0	0	0	35.4796	35.7641	37.9469	35.5415	22.0529	34.9068	34.4234	26.6362	21.2209	AGCGTGCCGGGTCAAGTTACCCGCGGCCCTGCCGGTGGCAGCCGCCCCGTGTCCCGGGCTGGCGGACGCCGACT|---TTGCGGCCCTCGGTGGCGGAGCCGCGTCGGGGTCCGGGTTCCTGGGGACCGGGCCGGTGGCCGGTGTCTTGGGGGGCGCCGCGCTGACCGGCAGTGCTGCTG
Rb1	WT	1.42103	36.0914	34.593	34.1	33.609	0.344865	0.134054	16.8938	0	0.00770879	0.173951	0.304935	0.154286	0.145308	TACAGAAACAGCTGCAATCCCCATTAATGGTTCACCTCGAACACCCAGAAGAGGTCAGAACAGGAGCGCTCGGATAGCAAAACAACTAGAAAATGAT|ACGAGGATTATCGAGGTTCTCTGTAAAGAACACGAGTGTAATATAGATGAGGTAATTTCTCTTACACTTTATTTAAAACAGCTGAAGTAGATATATATGCTAAGTCTGCCTGTCA
Rb1	Del 2|0	42.9111	5.38596	6.14227	6.89549	10.3261	19.5409	24.1578	16.4337	19.1445	20.1184	20.5802	20.8115	18.0706	20.7844	TACAGAAACAGCTGCAATCCCCATTAATGGTTCACCTCGAACACCCAGAAGAGGTCAGAACAGGAGCGCTCGGATAGCAAAACAACTAGAAAAT--T|ACGAGGATTATCGAGGTTCTCTGTAAAGAACACGAGTGTAATATAGATGAGGTAATTTCTCTTACACTTTATTTAAAACAGCTGAAGTAGATATATATGCTAAGTCTGCCTGTCA
Rb1	Del 22|5	27.5564	0.12514	0.142011	2.51141	6.50562	0	0	0	0	0	0	0	0	0	TACAGAAACAGCTGCAATCCCCATTAATGGTTCACCTCGAACACCCAGAAGAGGTCAGAACAGGAGCGCTCGGAT----------------------|-----GATTATCGAGGTTCTCTGTAAAGAACACGAGTGTAATATAGATGAGGTAATTTCTCTTACACTTTATTTAAAACAGCTGAAGTAGATATATATGCTAAGTCTGCCTGTCA
Rb1	Ins 1 T	14.1002	45.905	45.3592	44.9522	40.286	0	0	0	0	0	0	0	0	0	TACAGAAACAGCTGCAATCCCCATTAATGGTTCACCTCGAACACCCAGAAGAGGTCAGAACAGGAGCGCTCGGATAGCAAAACAACTAGAAAATGAT{T}|ACGAGGATTATCGAGGTTCTCTGTAAAGAACACGAGTGTAATATAGATGAGGTAATTTCTCTTACACTTTATTTAAAACAGCTGAAGTAGATATATATGCTAAGTCTGCCTGTCA
Rb1	Del 1|0	14.0112	5.51768	6.39511	3.87599	1.75217	41.5288	25.8534	34.0499	40.8377	40.078	37.7124	39.6296	34.5577	42.4837	TACAGAAACAGCTGCAATCCCCATTAATGGTTCACCTCGAACACCCAGAAGAGGTCAGAACAGGAGCGCTCGGATAGCAAAACAACTAGAAAATG-T|ACGAGGATTATCGAGGTTCTCTGTAAAGAACACGAGTGTAATATAGATGAGGTAATTTCTCTTACACTTTATTTAAAACAGCTGAAGTAGATATATATGCTAAGTCTGCCTGTCA
Rb1	Del 5|0	0	6.97491	7.36841	7.66489	7.5211	0	0	0	0	0	0	0	0	0	TACAGAAACAGCTGCAATCCCCATTAATGGTTCACCTCGAACACCCAGAAGAGGTCAGAACAGGAGCGCTCGGATAGCAAAACAACTAGAA-----T|ACGAGGATTATCGAGGTTCTCTGTAAAGAACACGAGTGTAATATAGATGAGGTAATTTCTCTTACACTTTATTTAAAACAGCTGAAGTAGATATATATGCTAAGTCTGCCTGTCA
Rb1	Del 6|21	0	0	0	0	0	18.6381	25.3593	16.4288	20.8289	21.0789	22.8946	19.2881	30.0666	15.4874	TACAGAAACAGCTGCAATCCCCATTAATGGTTCACCTCGAACACCCAGAAGAGGTCAGAACAGGAGCGCTCGGATAGCAAAACAACTAGAA------|---------------------TGTAAAGAACACGAGTGTAATATAGATGAGGTAATTTCTCTTACACTTTATTTAAAACAGCTGAAGTAGATATATATGCTAAGTCTGCCTGTCA
Rb1	Del 1|2	0	0	0	0	0	19.9473	24.4954	16.1938	19.1889	18.7169	18.6388	19.9659	17.1509	21.0992	TACAGAAACAGCTGCAATCCCCATTAATGGTTCACCTCGAACACCCAGAAGAGGTCAGAACAGGAGCGCTCGGATAGCAAAACAACTAGAAAATGA-|--GAGGATTATCGAGGTTCTCTGTAAAGAACACGAGTGTAATATAGATGAGGTAATTTCTCTTACACTTTATTTAAAACAGCTGAAGTAGATATATATGCTAAGTCTGCCTGTCA
Rps6ka3	WT	58.4699	99.6818	99.7465	75.8858	25.3829	100	100	100	100	100	100	100	100	100	GAGAGTCATTCTGGGCTAACAATGGGTTGTCTCTATATTTACCTTAACAGGAAGAAGGCAGTATCAAAGAAATTGCAATCACACATCATGTGAAGGAAGGACATG|AAAAGGCAGATCCTTCCCAGTTTGAACTTTTAAAAGTATTAGGGCAGGGATCATTTGGAAAGGTAAGTCATAGTTGTTTGC
Rps6ka3	Del 5|6	41.5301	0.318194	0.253476	24.1142	74.6171	0	0	0	0	0	0	0	0	0	GAGAGTCATTCTGGGCTAACAATGGGTTGTCTCTATATTTACCTTAACAGGAAGAAGGCAGTATCAAAGAAATTGCAATCACACATCATGTGAAGGAAGG----- | ------CAGATCCTTCCCAGTTTGAACTTTTAAAAGTATTAGGGCAGGGATCATTTGGAAAGGTAAGTCATAGTTGTTTGC
Runx3	WT	54.4787	98.7546	92.8491	55.0422	9.07787	0	0	0	0	0	0	0	0	0	GACAGCCCCAACTTCCTCTGCTCCGTGCTGCCCTCGCACTGGCGCTGCAACAAGACGCTGCCGGTCGCCT|TCAAGGTGAGTGCAGGGGCCCGAGCCGGGAGGACACCGGGGAACCTGGGCGCCCCCATTTGCAGGAGCCCATACCGGGGAGGACTTGGGGAGCACCTAGAAGTAGGACATGAAAGGGGATGTCACCCAG
Runx3	Del 1|0	45.5213	1.24536	7.15087	44.9578	90.9221	83.2522	75.6241	85.1435	84.8084	86.7616	80.3266	86.5387	84.7216	98.5987	GACAGCCCCAACTTCCTCTGCTCCGTGCTGCCCTCGCACTGGCGCTGCAACAAGACGCTGCCGGTCGCC-|TCAAGGTGAGTGCAGGGGCCCGAGCCGGGAGGACACCGGGGAACCTGGGCGCCCCCATTTGCAGGAGCCCATACCGGGGAGGACTTGGGGAGCACCTAGAAGTAGGACATGAAAGGGGATGTCACCCAG
Runx3	Del 0|2	0	0	0	0	0	16.7478	24.3759	14.8565	15.1916	13.2384	19.6734	13.4613	15.2784	1.40129	GACAGCCCCAACTTCCTCTGCTCCGTGCTGCCCTCGCACTGGCGCTGCAACAAGACGCTGCCGGTCGCCT|--AAGGTGAGTGCAGGGGCCCGAGCCGGGAGGACACCGGGGAACCTGGGCGCCCCCATTTGCAGGAGCCCATACCGGGGAGGACTTGGGGAGCACCTAGAAGTAGGACATGAAAGGGGATGTCACCCAG
Setd5	WT	68.6824	58.5983	67.4441	38.6027	10.6767	8.44689	0.590498	0.508836	16.7693	0.648432	3.73087	0.819225	0.236057	0.294114	GCCCTGGTTTTAGTAGGTAATCGCTCAGAAGGAAAGTTTTAACTCCTGGGAAAGCCCCTTCTATGCTAATTTATTCTATCGGGCGCCTTTGCCTTTCTCATTCTTAGGAATAAGGATCTTTCTCCTGTG|TACTGATGCTGCAGCCCGCCCTGCTGGCCTGGGTCAGGGGTGCGTGGATGACCTGCATTTTCTGCTTTCTCATGTTACTTGTGTAACGTCTTCACC
Setd5	Del 0|2	16.4147	3.25317	2.89876	21.2009	41.0808	0	0	0	0	0	0	0	0	0	GCCCTGGTTTTAGTAGGTAATCGCTCAGAAGGAAAGTTTTAACTCCTGGGAAAGCCCCTTCTATGCTAATTTATTCTATCGGGCGCCTTTGCCTTTCTCATTCTTAGGAATAAGGATCTTTCTCCTG--|TACTGATGCTGCAGCCCGCCCTGCTGGCCTGGGTCAGGGGTGCGTGGATGACCTGCATTTTCTGCTTTCTCATGTTACTTGTGTAACGTCTTCACC
Setd5	Del 5|0	14.8722	3.40965	2.70012	11.8453	22.8893	0	0	0	0	0	0	0	0	0	GCCCTGGTTTTAGTAGGTAATCGCTCAGAAGGAAAGTTTTAACTCCTGGGAAAGCCCCTTCTATGCTAATTTATTCTATCGGGCGCCTTTGCCTTTCTCATTCTTAGGAATAAGGATCTTTCTCCTGTG|-----ATGCTGCAGCCCGCCCTGCTGGCCTGGGTCAGGGGTGCGTGGATGACCTGCATTTTCTGCTTTCTCATGTTACTTGTGTAACGTCTTCACC
Setd5	Ins 1 A	0.030696	22.5169	16.186	17.6947	15.2267	0	0	0	0	0	0	0	0	0	GCCCTGGTTTTAGTAGGTAATCGCTCAGAAGGAAAGTTTTAACTCCTGGGAAAGCCCCTTCTATGCTAATTTATTCTATCGGGCGCCTTTGCCTTTCTCATTCTTAGGAATAAGGATCTTTCTCCTGTG|{A}TACTGATGCTGCAGCCCGCCCTGCTGGCCTGGGTCAGGGGTGCGTGGATGACCTGCATTTTCTGCTTTCTCATGTTACTTGTGTAACGTCTTCACC
Setd5	Del 8|0	0	7.0252	5.95939	6.33184	5.55191	0	0	0	0	0	0	0	0	0	GCCCTGGTTTTAGTAGGTAATCGCTCAGAAGGAAAGTTTTAACTCCTGGGAAAGCCCCTTCTATGCTAATTTATTCTATCGGGCGCCTTTGCCTTTCTCATTCTTAGGAATAAGGATCTT--------G|TACTGATGCTGCAGCCCGCCCTGCTGGCCTGGGTCAGGGGTGCGTGGATGACCTGCATTTTCTGCTTTCTCATGTTACTTGTGTAACGTCTTCACC
Setd5	Del 0|25	0	5.19684	4.81165	4.3246	4.57457	0	0	0	0	0	0	0	0	0	GCCCTGGTTTTAGTAGGTAATCGCTCAGAAGGAAAGTTTTAACTCCTGGGAAAGCCCCTTCTATGCTAATTTATTCTATCGGGCGCCTTTGCCTTTCTCATTCTTAGGAATAAGGATCTTTCTCCTG-G|TACTGATGCTGCAGCCCGCCCTGCTGGCCTGGGTCAGGGGTGCGTGGATGACCTGCATTTTCTGCTTTCTCATGTTACTTGTGTAACGTCTTCACC
Setd5	Del 0|3	0	0	0	0	0	29.9312	32.3098	32.5337	27.9848	39.4663	31.0318	30.8074	22.2969	32.6867	GCCCTGGTTTTAGTAGGTAATCGCTCAGAAGGAAAGTTTTAACTCCTGGGAAAGCCCCTTCTATGCTAATTTATTCTATCGGGCGCCTTTGCCTTTCTCATTCTTAGGAATAAGGATCTTTCTCCTGTG|------------------------GGCCTGGGTCAGGGGTGCGTGGATGACCTGCATTTTCTGCTTTCTCATGTTACTTGTGTAACGTCTTCACC
Setd5	Del 6|1	0	0	0	0	0	30.8328	33.1636	33.0517	27.5034	19.5223	33.5586	37.9681	36.4198	33.4682	GCCCTGGTTTTAGTAGGTAATCGCTCAGAAGGAAAGTTTTAACTCCTGGGAAAGCCCCTTCTATGCTAATTTATTCTATCGGGCGCCTTTGCCTTTCTCATTCTTAGGAATAAGGATCTTTCTCCTGTG|-ACTGATGCTGCAGCCCGCCCTGCTGGCCTGGGTCAGGGGTGCGTGGATGACCTGCATTTTCTGCTTTCTCATGTTACTTGTGTAACGTCTTCACC
Setd5	Del 0|1	0	0	0	0	0	30.789	33.9361	33.9058	27.7425	40.3629	31.6787	30.4053	41.0473	33.551	GCCCTGGTTTTAGTAGGTAATCGCTCAGAAGGAAAGTTTTAACTCCTGGGAAAGCCCCTTCTATGCTAATTTATTCTATCGGGCGCCTTTGCCTTTCTCATTCTTAGGAATAAGGATCTTTCTCCTGTG|-ACTGATGCTGCAGCCCGCCCTGCTGGCCTGGGTCAGGGGTGCGTGGATGACCTGCATTTTCTGCTTTCTCATGTTACTTGTGTAACGTCTTCACC
Smad4	WT	63.1572	31.0488	30.9174	15.4995	5.8087	3.59177	0.294673	0.177147	0.73461	0.161843	0.592005	0.236587	0.0256764	0.14354	AGTACGTTCACGACTTTGAAGGACAGCCGTCCTTACCCACTGAAGGACATTCGATTCAAACCATCCAACACCCGCCAAGTAATCGCGCATCAACGGAGACGTACAGCG|CCCCGGCTCTGTTAGCCCCGGCAGAGTCTAACGCCACCAGCACCACCAACTTCCCCAACATTCCTGTGGCTTCCACAAGTGAGTGTTGCAGTCAGATCGAGTCGAAAGTTTTC
Smad4	Del 16|0	29.5704	0.0445038	0.05945	3.98319	10.9085	0	0	0	0	0	0	0	0	0	AGTACGTTCACGACTTTGAAGGACAGCCGTCCTTACCCACTGAAGGACATTCGATTCAAACCATCCAACACCCGCCAAGTAATCGCGCATCA----------------|CCCCGGCTCTGTTAGCCCCGGCAGAGTCTAACGCCACCAGCACCACCAACTTCCCCAACATTCCTGTGGCTTCCACAAGTGAGTGTTGCAGTCAGATCGAGTCGAAAGTTTTC
Smad4	Del 2|0	2.94483	36.1259	35.6479	38.7973	33.0941	47.2927	49.2493	48.1658	48.9687	49.0854	49.3654	49.1327	37.8452	46.8941	AGTACGTTCACGACTTTGAAGGACAGCCGTCCTTACCCACTGAAGGACATTCGATTCAAACCATCCAACACCCGCCAAGTAATCGCGCATCAACGGAGACGTACAG--|CCCCGGCTCTGTTAGCCCCGGCAGAGTCTAACGCCACCAGCACCACCAACTTCCCCAACATTCCTGTGGCTTCCACAAGTGAGTGTTGCAGTCAGATCGAGTCGAAAGTTTTC
Smad4	Del 8|0	0.0236374	31.848	32.0011	33.7773	30.4931	0	0	0	0	0	0	0	0	0	AGTACGTTCACGACTTTGAAGGACAGCCGTCCTTACCCACTGAAGGACATTCGATTCAAACCATCCAACACCCGCCAAGTAATCGCGCATCAACGGAGAC--------|CCCCGGCTCTGTTAGCCCCGGCAGAGTCTAACGCCACCAGCACCACCAACTTCCCCAACATTCCTGTGGCTTCCACAAGTGAGTGTTGCAGTCAGATCGAGTCGAAAGTTTTC
Smad4	Del 39|50	4.30398	0.932725	1.37414	7.94267	19.6956	0	0	0	0	0	0	0	0	0	AGTACGTTCACGACTTTGAAGGACAGCCGTCCTTACCCACTGAAGGACATTCGATTCAAACCATCCAAC--------------------------------------- | --------------------------------------------------TTCCCCAACATTCCTGTGGCTTCCACAAGTGAGTGTTGCAGTCAGATCGAGTCGAAAGTTTTC
Smad4	Del 1|0	0	0	0	0	0	49.1155	50.456	51.6571	50.2967	50.7527	50.0426	50.6307	62.1291	52.9624	AGTACGTTCACGACTTTGAAGGACAGCCGTCCTTACCCACTGAAGGACATTCGATTCAAACCATCCAACACCCGCCAAGTAATCGCGCATCAACGGAGACGTACAGC-|CCCCGGCTCTGTTAGCCCCGGCAGAGTCTAACGCCACCAGCACCACCAACTTCCCCAACATTCCTGTGGCTTCCACAAGTGAGTGTTGCAGTCAGATCGAGTCGAAAGTTTTC
Tet2	WT	34.7656	71.9214	99.6558	30.6761	6.13239	100	100	100	100	100	100	100	100	100	CACCGTCACAATCACTTCTTGCTCCCCGTCTTGTTCTTCAGCCTCCTTTAGAAGGAAAAGGCGCTCTAAATGATGTAGCTTTGGAAGAACACCATGACTACCCCAAC|CGAAGCAACCGAACTCTTTTAAGGGAAGGGAAAATAGACCATCAACCCAAGACATCATCTAGCCAGAGTCTGAATCCATCTGTACATACACCCAACCCCCCCTTGATGCTTCCAGAACAGCAT
Tet2	Del 2|4	37.4687	28.0667	0.168181	44.2098	47.4251	0	0	0	0	0	0	0	0	0	CACCGTCACAATCACTTCTTGCTCCCCGTCTTGTTCTTCAGCCTCCTTTAGAAGGAAAAGGCGCTCTAAATGATGTAGCTTTGGAAGAACACCATGACTACCCCA--|----GCAACCGAACTCTTTTAAGGGAAGGGAAAATAGACCATCAACCCAAGACATCATCTAGCCAGAGTCTGAATCCATCTGTACATACACCCAACCCCCCCTTGATGCTTCCAGAACAGCAT
Tet2	Del 0|9	27.7657	0.0118618	0.176049	25.1141	46.4425	0	0	0	0	0	0	0	0	0	CACCGTCACAATCACTTCTTGCTCCCCGTCTTGTTCTTCAGCCTCCTTTAGAAGGAAAAGGCGCTCTAAATGATGTAGCTTTGGAAGAACACCATGACTACCCCAAC|---------CGAACTCTTTTAAGGGAAGGGAAAATAGACCATCAACCCAAGACATCATCTAGCCAGAGTCTGAATCCATCTGTACATACACCCAACCCCCCCTTGATGCTTCCAGAACAGCAT
Tsc1	WT	74.0947	68.6841	70.7397	48.1547	23.7398	0.352803	0.142548	0.624403	0.257681	0.0781608	0.165659	30.8234	0.171296	0.188758	TACTCTGCGACACAGAACATGCCCAGCATTTTCACTGTGCTTCCATTTCAGGAAGAAAGAGCAGATTCCTCAAGGCCTTACCTTCACAGACAGTCAAACGACCGAGG|ATTAGGTAAACTCCCTGGGTAATGATGGGCCTTGCTTGCCTCTTGGCATTGAACTCTGTAGCTTAAAAGCTAAGCTGGGTGGAAGAAGGATTTTCTGGGATAGCACCTATGCT
Tsc1	Del 5|3	25.1326	4.58476	4.68682	18.5697	40.6491	0	0	0	0	0	0	0	0	0	TACTCTGCGACACAGAACATGCCCAGCATTTTCACTGTGCTTCCATTTCAGGAAGAAAGAGCAGATTCCTCAAGGCCTTACCTTCACAGACAGTCAAACGAC-----|---AGGTAAACTCCCTGGGTAATGATGGGCCTTGCTTGCCTCTTGGCATTGAACTCTGTAGCTTAAAAGCTAAGCTGGGTGGAAGAAGGATTTTCTGGGATAGCACCTATGCT
Tsc1	Del 1|0	0.765278	16.4931	14.6297	19.382	20.0751	34.3174	34.06	21.0222	34.608	35.4035	33.748	31.6084	34.8809	37.2152	TACTCTGCGACACAGAACATGCCCAGCATTTTCACTGTGCTTCCATTTCAGGAAGAAAGAGCAGATTCCTCAAGGCCTTACCTTCACAGACAGTCAAACGACCGAG-|ATTAGGTAAACTCCCTGGGTAATGATGGGCCTTGCTTGCCTCTTGGCATTGAACTCTGTAGCTTAAAAGCTAAGCTGGGTGGAAGAAGGATTTTCTGGGATAGCACCTATGCT
Tsc1	Del 4|0	0.00372942	5.7756	5.34058	7.51827	8.30961	0	0	0	0	0	0	0	0	0	TACTCTGCGACACAGAACATGCCCAGCATTTTCACTGTGCTTCCATTTCAGGAAGAAAGAGCAGATTCCTCAAGGCCTTACCTTCACAGACAGTCAAACGACC----|ATTAGGTAAACTCCCTGGGTAATGATGGGCCTTGCTTGCCTCTTGGCATTGAACTCTGTAGCTTAAAAGCTAAGCTGGGTGGAAGAAGGATTTTCTGGGATAGCACCTATGCT
Tsc1	Del 11|0	0.00372942	4.46247	4.60324	6.37542	7.22633	0	0	0	0	0	0	0	0	0	TACTCTGCGACACAGAACATGCCCAGCATTTTCACTGTGCTTCCATTTCAGGAAGAAAGAGCAGATTCCTCAAGGCCTTACCTTCACAGACAGTCA-----------|ATTAGGTAAACTCCCTGGGTAATGATGGGCCTTGCTTGCCTCTTGGCATTGAACTCTGTAGCTTAAAAGCTAAGCTGGGTGGAAGAAGGATTTTCTGGGATAGCACCTATGCT
Tsc1	Del 0|2	0	0	0	0	0	37.2109	35.0692	43.5028	36.6045	36.6038	32.6698	18.7841	50.0651	36.7672	TACTCTGCGACACAGAACATGCCCAGCATTTTCACTGTGCTTCCATTTCAGGAAGAAAGAGCAGATTCCTCAAGGCCTTACCTTCACAGACAGTCAAACGACCGAGG|--TAGGTAAACTCCCTGGGTAATGATGGGCCTTGCTTGCCTCTTGGCATTGAACTCTGTAGCTTAAAAGCTAAGCTGGGTGGAAGAAGGATTTTCTGGGATAGCACCTATGCT
Tsc1	Del 8|11	0	0	0	0	0	28.1189	30.7283	34.8506	28.5298	27.9146	33.4166	18.7841	14.8827	25.8288	TACTCTGCGACACAGAACATGCCCAGCATTTTCACTGTGCTTCCATTTCAGGAAGAAAGAGCAGATTCCTCAAGGCCTTACCTTCACAGACAGTCAAAC--------|-----------TCCCTGGGTAATGATGGGCCTTGCTTGCCTCTTGGCATTGAACTCTGTAGCTTAAAAGCTAAGCTGGGTGGAAGAAGGATTTTCTGGGATAGCACCTATGCT
Tsc2	Del 3|0	33.101	29.8663	29.7381	26.3598	25.4389	0	0	0	0	0	0	0	0	0	CTAAGGTCCCTGGAGGCTACACCCTTCTCACTGTCCCCTTTTTGTCATGGCAGCATGCAGTGGAGGCACTTTGGAAGGCTGTCTCAGACTTGCTACAGCCAGAGCGGC---|CAGAGGCCCGGCATGCAGTTCTCACCTTATTGAAGGCCATTGTACAGGGACAGGTAAGGGGTGGAGCTGTGTGAGCCTGTGGGATGAAGGCAGACCGTCACCGTTTGAGCTCCTGC
Tsc2	Del 2|0	31.146	0.36722	0.305974	2.88896	7.16103	34.1565	33.6148	32.4203	34.8832	33.086	33.2384	36.2264	39.0155	32.7365	CTAAGGTCCCTGGAGGCTACACCCTTCTCACTGTCCCCTTTTTGTCATGGCAGCATGCAGTGGAGGCACTTTGGAAGGCTGTCTCAGACTTGCTACAGCCAGAGCGGCC--|CAGAGGCCCGGCATGCAGTTCTCACCTTATTGAAGGCCATTGTACAGGGACAGGTAAGGGGTGGAGCTGTGTGAGCCTGTGGGATGAAGGCAGACCGTCACCGTTTGAGCTCCTGC
Tsc2	Del 0|3	19.0434	3.50479	7.16234	3.95628	0.628161	0	0	0	0	0	0	0	0	0	CTAAGGTCCCTGGAGGCTACACCCTTCTCACTGTCCCCTTTTTGTCATGGCAGCATGCAGTGGAGGCACTTTGGAAGGCTGTCTCAGACTTGCTACAGCCAGAGCGGCCAC|---AGGCCCGGCATGCAGTTCTCACCTTATTGAAGGCCATTGTACAGGGACAGGTAAGGGGTGGAGCTGTGTGAGCCTGTGGGATGAAGGCAGACCGTCACCGTTTGAGCTCCTGC
Tsc2	Del 1|0	16.1507	55.8904	53.2726	56.1987	55.5004	33.3977	31.9999	34.3807	32.4974	33.2299	33.2832	36.6145	23.7624	33.1813	CTAAGGTCCCTGGAGGCTACACCCTTCTCACTGTCCCCTTTTTGTCATGGCAGCATGCAGTGGAGGCACTTTGGAAGGCTGTCTCAGACTTGCTACAGCCAGAGCGGCCA-|CAGAGGCCCGGCATGCAGTTCTCACCTTATTGAAGGCCATTGTACAGGGACAGGTAAGGGGTGGAGCTGTGTGAGCCTGTGGGATGAAGGCAGACCGTCACCGTTTGAGCTCCTGC
Tsc2	Del 12|0	0.558843	10.3713	9.5209	10.5963	11.2715	0	0	0	0	0	0	0	0	0	CTAAGGTCCCTGGAGGCTACACCCTTCTCACTGTCCCCTTTTTGTCATGGCAGCATGCAGTGGAGGCACTTTGGAAGGCTGTCTCAGACTTGCTACAGC------------|CAGAGGCCCGGCATGCAGTTCTCACCTTATTGAAGGCCATTGTACAGGGACAGGTAAGGGGTGGAGCTGTGTGAGCCTGTGGGATGAAGGCAGACCGTCACCGTTTGAGCTCCTGC
Tsc2	Del 1|0	0	0	0	0	0	32.4459	34.3852	33.1989	32.6194	33.6841	33.4784	27.1591	37.2222	34.0822	CTAAGGTCCCTGGAGGCTACACCCTTCTCACTGTCCCCTTTTTGTCATGGCAGCATGCAGTGGAGGCACTTTGGAAGGCTGTCTCAGACTTGCTACAGCCAGAGCGGCC-C|CAGAGGCCCGGCATGCAGTTCTCACCTTATTGAAGGCCATTGTACAGGGACAGGTAAGGGGTGGAGCTGTGTGAGCCTGTGGGATGAAGGCAGACCGTCACCGTTTGAGCTCCTGC
