# Supplementary material for: Extrachromosomal circular DNA harboring targeted tumor suppressor gene mutations supports intratumor heterogeneity in mouse liver cancer induced by multiplexed CRISPR/Cas9
Source: Research Square preprint supplement (doi:10.21203/rs.3.rs-1333557/v1), 2022-02-10
Supplement: Supplementary file 5 [file f48f6b5b3b1f4a489b337823.xlsx]

## Sheet: sgRNA Location
Gene Name	Assembly	Chr	Gene Location	sgRNA Location	sgRNA Sequence (5' to 3'+strand)
Apc	GRCm39 (GCF_000001635.27)	18	NC_000084.7 (34353350..34455243)	34402161...34402183	CCTACGGAAGTCGGGAAGGATCT
Apob	GRCm39 (GCF_000001635.27)	12	NC_000078.7 (8027629..8066839)	8027798...8027820	CCCTGCGGACGCCGTTACTGCTG
Arid1a	GRCm39 (GCF_000001635.27)	4	NC_000070.7 (133406319..133484682)	133480462...133480486	GGACAGATGCACTCGGGCGTGGG
Arid1b	GRCm39 (GCF_000001635.27)	17	NC_000083.7 (5044481..5397931)	5046739...5046761	CCCCCGGACCGACCATGGGCAGA
Arid2	GRCm39 (GCF_000001635.27)	15	NC_000081.7 (96185403..96303344)	96266559...96266581	CCAGACTGTTCCGTCTCTCGGG
Atm	GRCm39 (GCF_000001635.27)	9	NC_000075.7 (53348422..53448125)	53406053…53406075	GAGAAAGTCTCCGAATCGTTTGG
Axin1	GRCm39 (GCF_000001635.27)	17	NC_000083.7 (26350208..26414785)	26350297...26350319	CAGTGGCCAAGAGCAGGGACCGG
Cdkn2a (Arf)	GRCm39 (GCF_000001635.27)	4	NC_000070.7 (89192710..89212856)	89195114...89195136	CCGCCCGGTGCACGACGCAGCGG
Chd1	GRCm39 (GCF_000001635.27)	17	NC_000083.7 (15925229..15992874)	15945703...15945725	GCAAAACCACCAAAAGTCGACGG
Col1a1	GRCm39 (GCF_000001635.27)	11	NC_000077.7 (94827050..94843868)	94834166...94834188	TAGGGTCCTTCCGGTGAACGTGG
Dlc1	GRCm39 (GCF_000001635.27)	8	NC_000074.7 (37034893..37420343)	37051815...37051837	CCGAACCAATTCCGTCATCAGCG
Fbxw7	GRCm39 (GCF_000001635.27)	3	NC_000069.7 (84721901..84886505)	84874796...84874818	CGGCTCAGACTTGTCGATACTGG
Hic1	GRCm39 (GCF_000001635.27)	11	NC_000077.7 (75052203..75061081)	75057776...75057798	CCGTCGGGCCCCGATGCAGCCGT
Hnf1a	GRCm39 (GCF_000001635.27)	5	NC_000071.7 (115087039..115109121)	115108693...115108715	CCTTGGAGAAACGCGTGGCTCTG
Keap1	GRCm39 (GCF_000001635.27)	9	NC_000075.7 (21141026..21150628)	21145109...21145131	CCGACGCGCGCTGCAAGGACTAG
Kmt2a (Mll1)	GRCm39 (GCF_000001635.27)	9	NC_000075.7 (44714652..44793492)	44756793...44756815	AGAAAGGGCGGCGATCAAGGCGG
Kmt2c (Mll3)	GRCm39 (GCF_000001635.27)	5	NC_000071.7 (25476793..25703853)	25519264...25519286	CCTGGCCGTATAGACACATTCAG
Mlh1	GRCm39 (GCF_000001635.27)	9	NC_000075.7 (111057296..111100854)	111070618...111070640	GGCAGCTAGACCCACGACAGGGG
Mst1	GRCm39 (GCF_000001635.27)	9	NC_000075.7 (107957607..107962226)	107959214...107959236	TGCAACGGTGAGGATTACCGTGG
Msx1	GRCm39 (GCF_000001635.27)	5	NC_000071.7 (37977835..37981929)	37981357...37981379	CCGGGTCTCTGGGCGCCCCGGAT
Nf1	GRCm39 (GCF_000001635.27)	11	NC_000077.7 (79223541..79472435)	79344960...79344982	CCCTTTATTACGAGTCATCATCA
Notch3	GRCm39 (GCF_000001635.27)	17	NC_000083.7 (32339794..32385869)	32372735...32372757	TACCTCTGCCGTTGTCCTCCCGG
P53	GRCm39 (GCF_000001635.27)	11	NC_000077.7 (69471174..69482699)	69477752...69477774	CCTCGAGCTCCCTCTGAGCCAGG
Pik3r1	GRCm39 (GCF_000001635.27)	13	NC_000079.7 (101817269..101904725)	101825942...101825964	CCTTTTTGGTACGAGACGCATCT
Pten	GRCm39 (GCF_000001635.27)	19	NC_000085.7 (32734977..32803560)	32789155...32789177	TCACCTGGATTACAGACCCGTGG
Rasa1	GRCm39 (GCF_000001635.27)	13	NC_000079.7 (85362818..85437605)	85436844...85436866	CCGACTTGGTTGCGGCCCTCGGT
Rb1	GRCm39 (GCF_000001635.27)	14	NC_000080.7 (73430298..73563446)	73517607...73517629	AACAACTAGAAAATGATACGAGG
Rps6ka3	GRCm39 (GCF_000001635.27)	X	NC_000086.8 (158038652..158151240)	158094498...158094520	TGTGAAGGAAGGACATGAAAAGG
Runx3	GRCm39 (GCF_000001635.27)	4	NC_000070.7 (134847956..134905301)	134880346...134880368	GACGCTGCCGGTCGCCTTCAAGG
Setd5	GRCm39 (GCF_000001635.27)	6	NC_000072.7 (113054326..113130393)	113055572...113055594	CCTGTGTACTGATGCTGCAGCCCG
Smad4	GRCm39 (GCF_000001635.27)	18	NC_000084.7 (73767861..73836862)	73795801...73795823	AACGGAGACGTACAGCGCCCCGG
Stk11(Lkb1)	GRCm39 (GCF_000001635.27)	10	NC_000076.7 (79951602..79966513)	79952616...79952638	CGGGGAGGGCTCGTACGGCAAGG
Tet2	GRCm39 (GCF_000001635.27)	3	NC_000069.7 (133169438..133250882)	133193165...133193187	CCCAACCGAAGCAACCGAACTCT
Tsc1	GRCm39 (GCF_000001635.27)	2	NC_000068.8 (28531005..28581184)	28565239..28565261	CAGTCAAACGACCGAGGATTAGG
Tsc2	GRCm39 (GCF_000001635.27)	17	NC_000083.7 (24814790..24851607)	24848890...24848912	ACAGCCAGAGCGGCCACCAGAGG

## Sheet: Target site PCR primers
Target Gene	In-Primer-F (5' to 3')	In-Primer-R (5' to 3')	Reference
Apc	CATGGCATAAAGCAGTTACT	GATACCCAGTACTCTCTCTG	CATGGCATAAAGCAGTTACTACATAAGAACTTGTTTCTGTTTAGAATTTAACTTAGATAGTAATTTCCCCGGAGTGAAACTACGCTCAAAAATGTCCCTTCGCTCCTACG|GAAGTCGGGAAGGATCTGTATCCAGCCGTTCAGGAGAATGCAGTCCTGTCCCCATGGGGTCATTCCCAAGAAGAACATTTGTAAATGGAAGCAGAGAGAGTACTGGGTATC
Apob	TCCGAAGACCCTGTAGAGCA	TGGCTTTCTCCCAGGCTTC	TCCGAAGACCCTGTAGAGCAAGCAGCAGGGGCTAGGCCCGTGGCCAGGCCACAGCCAGGAAGCCACCCCACCATCCATCCGCCATGGGCCCACGAAAGCCTGCCCTGC|GGACGCCGTTACTGCTGCTGTTCCTGCTACTGTTCTTGGACACCAGCGTCTGGGCTCGTGAGTTAGGGTGGAAGCCTGGGAGAAAGCCA
Arid1a	TATGCAGAGGAACCCCCAGA	CAGCCGTTAACACAGTACCT	TATGCAGAGGAACCCCCAGATGCCCCAGTACACTTCCCCTCAGCCTGGCTCGGCCTTATCCCCACGTCAGCCGTCTGGAGGACAGATGCACTCGGG|CGTGGGCTCCTACCAGCAGAACTCCATTAGGGGAGCTACGGCCCCCAGGGCAGTCAGTATGGCCCACAAGGTAAGTGTGCTACCCCTTTAGAAGGAAAGAGAGGTACTGTGTTAACGGCTG
Arid1b	CTTGGGCAAGGACCTAGGC	CAACCGCCGGGAAAAGTAC	CTTGGGCAAGGACCTAGGCGCCCAGTACGCCGCTGCCAGCCCGGCCTGGGCGGCCGCGCAACAAAGGAGTCACCCGGCGATGAGCCCCGGCACCCCCG|GACCGACCATGGGCAGATCCCAGGTAACCCCCGCGCCCGGCCGGGCCTGCTTCCGCCCGGGCCTCGCGCCGCGAGCCCGACTTTCTTTCTTCGCCGGGTACTTTTCCCGGCGGTTG
Arid2	CAGCTTAACATAGGGCTTCC	GAGCTGTGCGAGTTACCTAA	CAGCTTAACATAGGGCTTCCTGTGGTATATAATGTCTTTATTCCTCTCTCTCTCTCTTTTAGGCTAAATGCTCATTTTGAAGTAAATCCAGAC|TGTTCCGTCTCTCGGGCAGAAATGTATTCAGAGTACCTCTCAACTTGCAGTAAATTAGCTCGCGGTGGCATCCTCACATCAACTGGGTTTTATAAGTGTCTTAGGTAACTCGCACAGCTC
Atm	TCTGTCATTCATTGGTGAAG	CAGTATCTTGAAGGTTCAGC	TCTGTCATTCATTGGTGAAGAAATCAAAGTAGAAAAACATTGAGCGACTGCTCTAAAGTCCTATTATTCCCATTTTCTTAAACATCATGTTTTTCCTTTCTGCAGGTTTTAGAGAAAGTCTCCGAATC|GTTTGGATGTAGAAGTTTAGAAGACTTCATGATTTCTCACCTAGACTACCTGGTTTTGGAATGGCTGAACCTTCAAGATACTG
Axin1	GTTCTGAGGCCCGTCATCT	TTACCTCACCTGCCTGGCTC	GTTCTGAGGCCCGTCATCTGGTCCCTGCCTCAGCCAATAGGCGGCAGGAGCCCGAGCTGCAGCCTAGAGTCACGCTTCTGCCTCCCAGCCACACAGTGGCCAAGAGCAGG|GACCGGCTTCCTAGAGTGGCTGAAAGTGCTCGGACGGACAGCCAAGCCCATCATGGCGGACAGCGGGACAGTGGGTCGTGATCAGGCACTTGGAGCCAGGCAGGTGAGGTAA
Cdkn2a	CAGGTGATGATGATGGGCAA	TCTTGGGCCAAGTCGAGC	CAGGTGATGATGATGGGCAACGTTCACGTAGCAGCTCTTCTGCTCAACTACGGTGCAGATTCGAACTGCGAGGACCCCACTACCTTCTCCCGCCC|GGTGCACGACGCAGCGCGGGAAGGCTTCCTGGACACGCTGGTGGTGCTGCACGGGTCAGGGGCTCGGCTGGATGTGCGCGATGCCTGGGGTCGCCTGCCGCTCGACTTGGCCCAAGA
Chd1	AGCGACTCTGATTCTGGCT	GTGCTGTACTGCTGCGCTA	AGCGACTCTGATTCTGGCTCTGACTCAGGAAGTCAATCAGAGTCTGAATCAGACACATCCCGAGAGAACAAGGTTCAAGCAAAACCACCAAAAGT|CGACGGAGCCGAGGTAAGTTAGTGCAATTGAACTGGCTTAAGACAGAAGTTAAATCTTATAACTGACTGGACAGTGTCATGGCCTGGGCATATAGCGCAGCAGTACAGCAC
Col1a1	AGTCCAAGACCTTCTCCCA	CCATACAGGACAGAGGATCT	AGTCCAAGACCTTCTCCCAGCATGAAGAGGATGCTAAACCCGTGGTAATAAGGCCAAGGCTGTGGCCCTGATGCGTCTGTGACTTCTCTCCACTTAGGGTCCTTCCGGTGA|ACGTGGTGCTCCCGGACCTGCTGGTCCCAAAGGTTCTCCTGGTGAAGCTGGTCGCCCCGGTGAAGCTGGTCTCCCTGGTGCCAAGGTGAGAAGATCCTCTGTCCTGTATGG
Dlc1	ACGAAAGCATGCTGACAGAC	ACTGAAGCTGGACAGTTCCT	ACGAAAGCATGCTGACAGACCTCAGCGAGCACCAGGAGGTGGCCTCTGTCCGAAGCCTCAGCAGCACCAGCAGCAGCGTCCCCACCCACGCAGCCCACAGTGGAGATGCCACTACGCCCCGAAC|CAATTCCGTCATCAGCGTCTGCTCCTCCGGACACTTTGTAGGCAATGATGACTCTTTTTCCAGCCTGCCGTCTCCCAAGGAACTGTCCAGCTTCAGT
Fbxw7	GTGTGAGTATGCCTTCCCTA	ACTCTCACTCACAGCCAAG	GTGTGAGTATGCCTTCCCTATTTCCTTTTCCATAGTTGGCACTCTATGTGCTTTCATTCCTGGAACCCAAAGACCTGCTGCAAGCGGCTCAGACTTGTCGA|TACTGGAGAATTTTGGCTGAGGATAACCTTCTCTGGAGAGAGAAATGTAAAGAAGAGGGTAAGTTCAGAATCACACACAGATGTGTTTCTACTCTGGAAACAAGTTAACAGAATAACTTGGCTGTGAGTGAGAGT
Hic1	CTACGCTCCTTACGGGCGGC	CAAAGCGGGGAGCAGCGACG	CTACGCTCCTTACGGGCGGCCCGGCCGGGGCTTGAGGGCTGCCACGCCCGTCATCCAGGCTTGCTACTCGTCCCCGGCCGGGCCACCGCCGCCGCCTGCCGCCGAGCCGCCGTCG|GGCCCCGATGCAGCCGTCAACACCCACTGCGCTGAGCTATATGCTTCAGGCCCGGGCCCAGCAGCCTCACTCTGCGCCCCGGAGCGTCGCTGCTCCCCGCTTTG
Hnf1a	GCCCTACCTGATGGTTGGAG	TGACTCCACCACGGCTTTCT	GCCCTACCTGATGGTTGGAGAGGGTCCCCTGGACAAGGGGGAGTCCTGCGGTGGGAGTCGAGGGGACCTGACCGAGTTGCCTAATGGCCTTGG|AGAAACGCGTGGCTCTGAAGATGACACGGATGACGATGGGGAAGACTTCGCGCCACCCATTCTGAAAGAGCTGGAGAACCTCAGCCCAGAGGAGGCAGCCCACCAGAAAGCCGTGGTGGAGTCA
Keap1	CTTCTACGTGCAGGCACTG	AGCGACTGTCGGAAGTAACC	CTTCTACGTGCAGGCACTGCTGCGGGCCGTGCGCTGCCATGCGCTCACGCCGCGCTTCCTGCAGACGCAGCTGCAGAAGTGTGAGATCCTGCAGGCCGACG|CGCGCTGCAAGGACTACCTGGTGCAGATATTCCAGGAGCTCACGCTGCACAAGCCCACGCAGGCAGTGCCCTGCCGCGCGCCCAAAGTGGGCCGCCTCATCTACACAGCGGGCGGTTACTTCCGACAGTCGCT
Kmt2a	AGTTGCTGGCTCAGAAGATG	TATATTGCGGCCACCAAACT	AGTTGCTGGCTCAGAAGATGCCGAGCCTCTTGCTCCTCCCATCAAACCAATTAAGCCTGTCACCAGAAACAAGGCACCTCAGGAGCCTCCGGTGAAGAAAGGGCGGCGATCA|AGGCGGTGCGGACAATGTCCTGGCTGCCAGGTGCCTGAGGACTGTGGCATTTGCACTAATTGCCTGGACAAGCCCAAGTTTGGTGGCCGCAATATA
Kmt2c	CTCATGCCAAACCAGGATC	CGAAAGACTCAGAATGAGGC	CTCATGCCAAACCAGGATCCTTTTTTGCAAGCAGCACAAAACCGAGTACCAGGTTTACCTGGCCCTTTGATAAGGCCACCTGATACATGCTCCCAGACTCCCAGGCCACCTGGGCCTGGC|CGTATAGACACATTCACTCATGCTTCCTCATCTGCTGTTCGTGATCCATATGATCAGCCTCCAGTGACTCCCAGGCCTCATTCTGAGTCTTTCG
Lkb1	ATCGACTCCACCGAGGTAAT	TACTTCTTGACGTTGGCCTC	ATCGACTCCACCGAGGTAATCTACCAGCCGCGCCGCAAACGCGCCAAGCTCATCGGCAAGTACCTGATGGGGGACCTGCTCGGGGAGGGCTCGTACG|GCAAGGTGAAGGAGGTGCTGGACTCCGAGACCTTATGCCGCAGGGCGGTCAAGATCCTCAAGAAGAAAAAGCTGCGCAGGATCCCCAATGGAGAGGCCAACGTCAAGAAGTA
Mlh1	ATGTGCTAAAACCTGGCCTT	CTTACAGGCTGCAGAAAGGC	ATGTGCTAAAACCTGGCCTTTTTTACTCTTTTCTCTCTTGAAACAGACCTTGCTTCCAGGACTTGCTGGGCCTTCTGGGGAGGCAGCTAGACCCACGA|CAGGGGTGGCTTCCTCATCCACTAGTGGAAGTGGCGACAAGGTCTACGCTTACCAGATGGTCCGTACGGACTCCCGGGAGCAGAAGCTTGACGCCTTTCTGCAGCCTGTAAG
Mst1	TGGGGTCAATCAAGCCTAAG	TGCCTACATACTTTTCAGGC	TGGGGTCAATCAAGCCTAAGGAGGGAGTGATAGGCCTGCCCCCACTTAGAAGTGCATTGGCCCTGTTTCCAGCTGTTTGTGTTCTGTGCAACGGTGAGGATTA|CCGTGGCGAGGTAGACGTTACAGAGTCAGGGCGGGAGTGTCAACGCTGGGACCTGCAGCACCCCCACTCGCACCCTTTCCAGCCTGAAAAGTATGTAGGCA
Msx1	TCATGGCCGATCACAGGAAG	TCTAGTTTCTCGGGGCTTTC	TCATGGCCGATCACAGGAAGCCCGGGGCCAAGGAGAGCGTCCTGGTGGCCTCCGAAGGGGCTCAGGCAGCGGGTGGCTCGGTGCAGCACTTGGGCACCCGGCCCGGGT|CTCTGGGCGCCCCGGATGCGCCCTCCTCGCCGCGGCCTCTCGGCCATTTCTCAGTCGGAGGACTCCTCAAGCTGCCAGAAGATGCTCTGGTGAAGGCCGAAAGCCCCGAGAAACTAGA
Nf1	GACTGTGTGGAGGGATTATG	GAGTGAGGGAGCAACTGTGA	GACTGTGTGGAGGGATTATGTTTTAAATGTAGGATGTGTGGCTGTGGCTATTGGCCTGACTGTGTGTTTCTTTAGGTGTATGGTGCTACTTACCTACAAAAGCTCTTGGACCCTTT|ATTACGAGTCATCATCACATCTTCGGATTGGCAACATGTTAGCTTTGAAGTGGATCCTACCAGGTTTGTCATCTTGTCACAGTTGCTCCCTCACTC
Notch3	CATACGCTGTGAGAGCCAG	AGGGAGGGAAGAAGTATGGCA	CATACGCTGTGAGAGCCAGGTGGATGAGTGCCGCAGCCAGCCCTGTCGATATGGGGGCAAATGTCTAGACTTGGTGGACAAGTACCTCTGCCGTTGTCC|TCCCGGAACCACAGGTGGGGCCTGGGGCTGGGCTATAACAGTACGTGGGGGTGTGTGGGGGTCTGTGATGAATTTGTAACTGGTGCTTGACAATAGTAGGTACTCTTGCCATACTTCTTCCCTCCCT
P53	AGCCATAGGGGTTTGTTTG	TTCTCTCAGGCAAGGGGA	AGCCATAGGGGTTTGTTTGTTTGTATGTTTTTTAATTGACAAGTTATGCATCCATACAGTACACAATCTCTTCTCTCTACAGATGACTGCCATGGAGGAGTCACAGTCGGATATCAGCCTCGAGCTCCCTCTGA|GCCAGGAGACATTTTCAGGCTTATGGAAACTGTGAGTGGATCTTTTTGGGGCCCTTAAGATACATCCCGCCATACCTGTATCCTCCCCTTGCCTGAGAGAA
Pik3r1	AGTGTGTGGTTACTCAAAGT	TCATGACAACTGAGACATCG	AGTGTGTGGTTACTCAAAGTTGAAAAGTAAGTATGGTCTTATACTGTGTTCATTTTAGGGAAGAAGTGAATGAAAAACTCCGAGACACTGCTGATGGGACCTTTT|TGGTACGAGACGCATCTACTAAAATGCACGGCGATTACACTCTTACACTAAGGTGAGCCAGGAAGTCAGCTGTAATTGCGATGTCTCAGTTGTCATGA
Pten	CTTTTGTCTCCCTCCTCCCT	TCCGACACACAGACAGCTAAG	CTTTTGTCTCCCTCCTCCCTCTGCCCCCTGGGCCTATCAGGGAGTCACAATTCCCAGTCAGAGGCGCTATGTATATTATTATAGCTACCTGCTAAAAAATCACCTGGATTACAGAC|CCGTGGCACTGCTGTTTCACAAGATGATGTTTGAAACTATTCCAATGTTCAGTGGCGGAACTTGCAGTAAGTGCTCTAAATTCTTAGCTGTCTGTGTGTCGGA
Rasa1	AGCGTGCCGGGTCAAGTTA	CAGCAGCACTGCCGGTCA	AGCGTGCCGGGTCAAGTTACCCGCGGCCCTGCCGGTGGCAGCCGCCCCGTGTCCCGGGCTGGCGGACGCCGACT|TGGTTGCGGCCCTCGGTGGCGGAGCCGCGTCGGGGTCCGGGTTCCTGGGGACCGGGCCGGTGGCCGGTGTCTTGGGGGGCGCCGCGCTGACCGGCAGTGCTGCTG
Rb1	TACAGAAACAGCTGCAATCC	TGACAGGCAGACTTAGCATA	TACAGAAACAGCTGCAATCCCCATTAATGGTTCACCTCGAACACCCAGAAGAGGTCAGAACAGGAGCGCTCGGATAGCAAAACAACTAGAAAATGAT|ACGAGGATTATCGAGGTTCTCTGTAAAGAACACGAGTGTAATATAGATGAGGTAATTTCTCTTACACTTTATTTAAAACAGCTGAAGTAGATATATATGCTAAGTCTGCCTGTCA
Rps6ka3	GAGAGTCATTCTGGGCTAAC	GCAAACAACTATGACTTACC	GAGAGTCATTCTGGGCTAACAATGGGTTGTCTCTATATTTACCTTAACAGGAAGAAGGCAGTATCAAAGAAATTGCAATCACACATCATGTGAAGGAAGGACATG|AAAAGGCAGATCCTTCCCAGTTTGAACTTTTAAAAGTATTAGGGCAGGGATCATTTGGAAAGGTAAGTCATAGTTGTTTGC
Runx3	GACAGCCCCAACTTCCTCT	CTGGGTGACATCCCCTTTCA	GACAGCCCCAACTTCCTCTGCTCCGTGCTGCCCTCGCACTGGCGCTGCAACAAGACGCTGCCGGTCGCCT|TCAAGGTGAGTGCAGGGGCCCGAGCCGGGAGGACACCGGGGAACCTGGGCGCCCCCATTTGCAGGAGCCCATACCGGGGAGGACTTGGGGAGCACCTAGAAGTAGGACATGAAAGGGGATGTCACCCAG
Setd5	GCCCTGGTTTTAGTAGGTAAT	GGTGAAGACGTTACACAAGT	GCCCTGGTTTTAGTAGGTAATCGCTCAGAAGGAAAGTTTTAACTCCTGGGAAAGCCCCTTCTATGCTAATTTATTCTATCGGGCGCCTTTGCCTTTCTCATTCTTAGGAATAAGGATCTTTCTCCTGTG|TACTGATGCTGCAGCCCGCCCTGCTGGCCTGGGTCAGGGGTGCGTGGATGACCTGCATTTTCTGCTTTCTCATGTTACTTGTGTAACGTCTTCACC
Smad4	AGTACGTTCACGACTTTGAA	GAAAACTTTCGACTCGATCT	AGTACGTTCACGACTTTGAAGGACAGCCGTCCTTACCCACTGAAGGACATTCGATTCAAACCATCCAACACCCGCCAAGTAATCGCGCATCAACGGAGACGTACAGCG|CCCCGGCTCTGTTAGCCCCGGCAGAGTCTAACGCCACCAGCACCACCAACTTCCCCAACATTCCTGTGGCTTCCACAAGTGAGTGTTGCAGTCAGATCGAGTCGAAAGTTTTC
Tet2	CACCGTCACAATCACTTCTTG	ATGCTGTTCTGGAAGCATCA	CACCGTCACAATCACTTCTTGCTCCCCGTCTTGTTCTTCAGCCTCCTTTAGAAGGAAAAGGCGCTCTAAATGATGTAGCTTTGGAAGAACACCATGACTACCCCAAC|CGAAGCAACCGAACTCTTTTAAGGGAAGGGAAAATAGACCATCAACCCAAGACATCATCTAGCCAGAGTCTGAATCCATCTGTACATACACCCAACCCCCCCTTGATGCTTCCAGAACAGCAT
Tsc1	TACTCTGCGACACAGAACAT	AGCATAGGTGCTATCCCAGA	TACTCTGCGACACAGAACATGCCCAGCATTTTCACTGTGCTTCCATTTCAGGAAGAAAGAGCAGATTCCTCAAGGCCTTACCTTCACAGACAGTCAAACGACCGAGG|ATTAGGTAAACTCCCTGGGTAATGATGGGCCTTGCTTGCCTCTTGGCATTGAACTCTGTAGCTTAAAAGCTAAGCTGGGTGGAAGAAGGATTTTCTGGGATAGCACCTATGCT
Tsc2	CTAAGGTCCCTGGAGGCTAC	GCAGGAGCTCAAACGGTGA	CTAAGGTCCCTGGAGGCTACACCCTTCTCACTGTCCCCTTTTTGTCATGGCAGCATGCAGTGGAGGCACTTTGGAAGGCTGTCTCAGACTTGCTACAGCCAGAGCGGCCAC|CAGAGGCCCGGCATGCAGTTCTCACCTTATTGAAGGCCATTGTACAGGGACAGGTAAGGGGTGGAGCTGTGTGAGCCTGTGGGATGAAGGCAGACCGTCACCGTTTGAGCTCCTGC

## Sheet: eccDNA junction PCR primers
Target Gene	Chr	Gene Location	sgRNA Location	Detected Circle Start	Detected Circle End	Out-Primer-F (5' to 3')	Out-Primer-R (5' to 3')	Reference
Atm	9	NC_000075.7 (53348422..53448125)	53406053…53406075	53405976	53406186	TCATGTTTTTCCTTTCTGCA	TGGGAATAATAGGACTTTAG	TCATGTTTTTCCTTTCTGCAGGTTTTAGAGAAAGTCTCCGAATCGTTTGGATGTAGAAGTTTAGAAGACTTCATGATTTCTCACCTAGACTACCTGGTTTTGGAATGGCTGAACCTTCAAGATACTGTCTGTCATTCATTGGTGAAGAAATCAAAGTAGAAAAACATTGAGCGACTGCTCTAAAGTCCTATTATTCCCA
Rb1	14	NC_000080.7 (73430298..73563446)	73517607...73517629	73517498	73517709	ACCCAGAAGAGGTCAGAACA	AGGTGAACCATTAATGGGGA	ACCCAGAAGAGGTCAGAACAGGAGCGCTCGGATAGCAAAACAACTAGAAAATGATACGAGGATTATCGAGGTTCTCTGTAAAGAACACGAGTGTAATATAGATGAGGTAATTTCTCTTACACTTTATTTAAAACAGCTGAAGTAGATATATATGCTAAGTCTGCCTGTCATACAGAAACAGCTGCAATCCCCATTAATGGTTCACCT
Kmt2c	5	NC_000071.7 (25476793..25703853)	25519264...25519286	25519187	25519400	CAGGCCTCATTCTGAGTCT	TCATATGGATCACGAACAGC	CAGGCCTCATTCTGAGTCTTTCGCTCATGCCAAACCAGGATCCTTTTTTGCAAGCAGCACAAAACCGAGTACCAGGTTTACCTGGCCCTTTGATAAGGCCACCTGATACATGCTCCCAGACTCCCAGGCCACCTGGGCCTGGCCGTATAGACACATTCACTCATGCTTCCTCATCTGCTGTTCGTGATCCATATGA
